# Supplementary material for: Positive selection in noncoding genomic regions of vocal learning birds is associated with genes implicated in vocal learning and speech functions in humans
Source: HighWire-hosted journal article supplement (doi:10.1101/gr.275989.121), 2021-10-19
Supplement: Supplemental_Figure_S1.pdf [file Supplemental_Figure_S1.pdf]

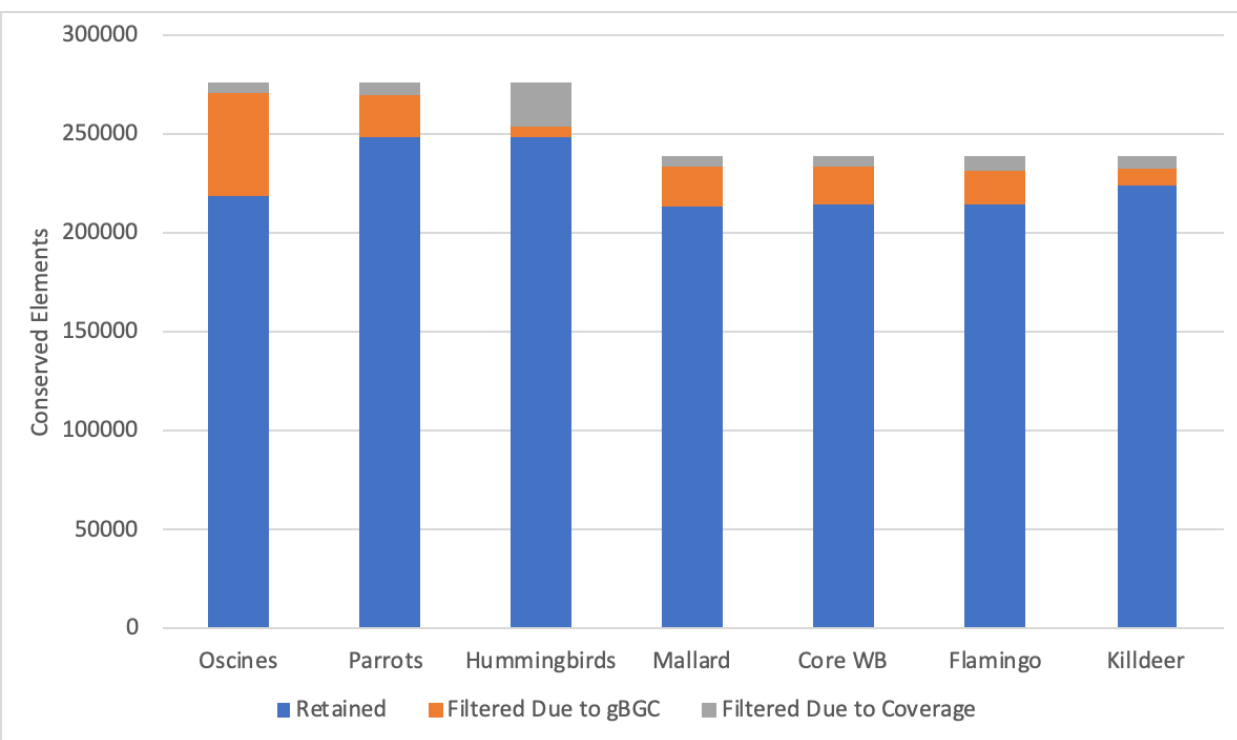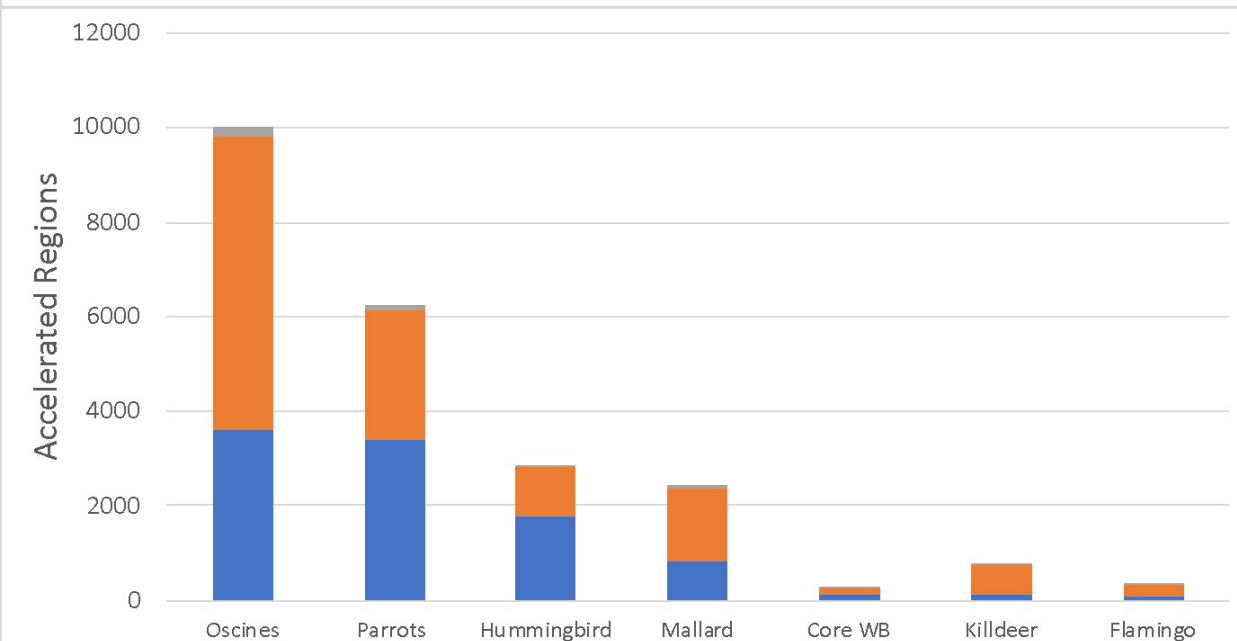

**Supplemental Figure S1. Data Filtering.** (A) Total evolutionary conserved elements (ECE) greater than 100 bp identified in the lineages shown (listed), broken down by the fraction filtered out due to gBGC or not present in 1 or more species of the lineage tested. (B) Among the ECEs, the total ARs in each lineage retained filtered for gBGC and target species coverage. Core WB, core waterbirds.
