# Supplementary material for: Positive selection in noncoding genomic regions of vocal learning birds is associated with genes implicated in vocal learning and speech functions in humans
Source: HighWire-hosted journal article supplement (doi:10.1101/gr.275989.121), 2021-10-19
Supplement: Supplemental_Figure_S3.pdf [file Supplemental_Figure_S3.pdf]

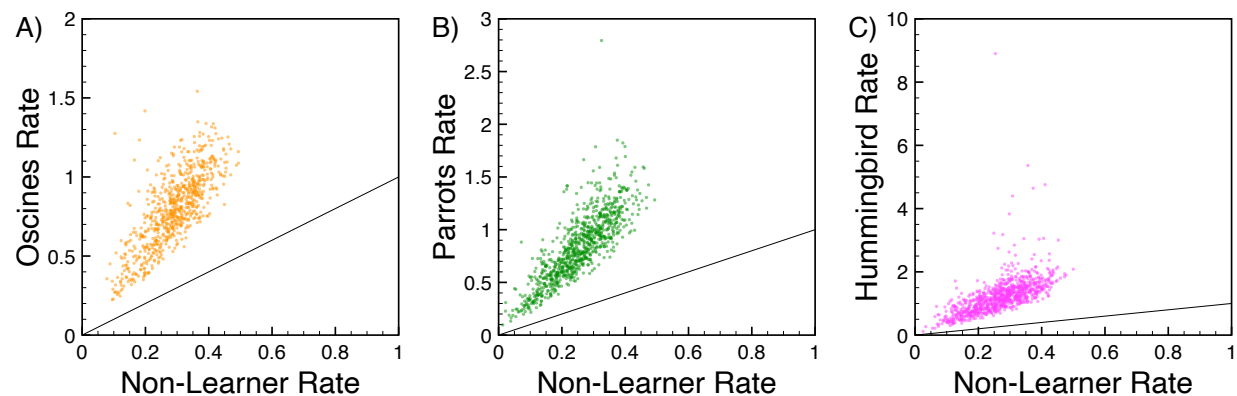

**Supplemental Figure S3. Distributions of Acceleration Rates:** (A-C) PhyloP estimates for acceleration rate distribution in vocal learners (Oscines A, Parrots B, Hummingbirds C) plotted against the background species vocal non-learner rates, relative to the neutral model estimated from 4-fold degenerate sites by PhyloFit. These can be taken as the average rate for molecular evolution across the group in question at the site. For reference we show a 1:1 line in each figure that would be consistent with the absence of a rate change in the vocal learning lineage.
