# Supplementary material for: Positive selection in noncoding genomic regions of vocal learning birds is associated with genes implicated in vocal learning and speech functions in humans
Source: HighWire-hosted journal article supplement (doi:10.1101/gr.275989.121), 2021-10-19
Supplement: Supplemental_Figure_S4.pdf [file Supplemental_Figure_S4.pdf]

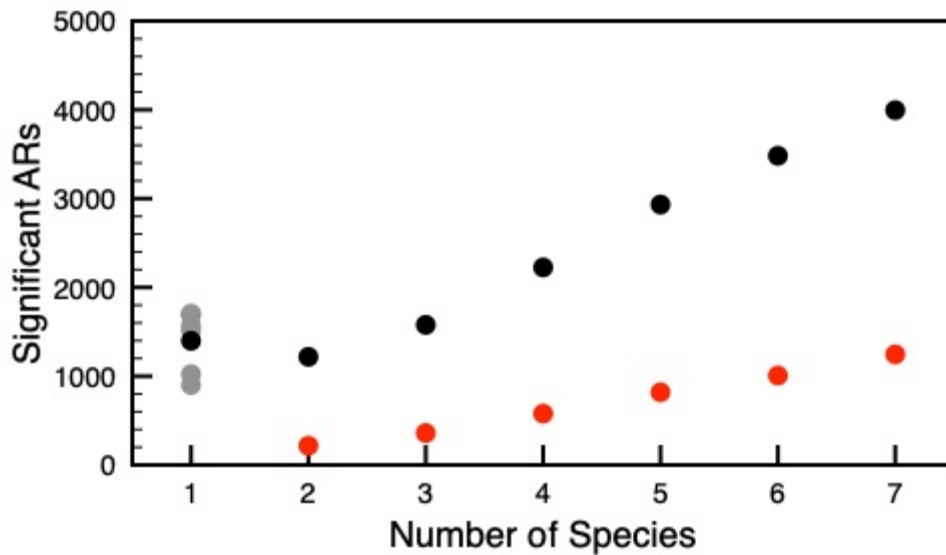

**Supplemental Figure S4. Significant ARs across downsamplings.** The number of ARs significant at  $p < 0.05$  after multiple tests correction for 1 to 7 oscine songbirds, added in the following order, White Throated Sparrow, Bowerbird, American Crow, Tibetan Ground Tit, Collared Flycatcher, Zebra Finch, Medium Ground Finch (black). Grey, the number of ARs observed for each of the other single oscine songbird tests. Red, the number of ARs in the multispecies test not found in any of the individual species tests.
