# Supplementary material for: Positive selection in noncoding genomic regions of vocal learning birds is associated with genes implicated in vocal learning and speech functions in humans
Source: HighWire-hosted journal article supplement (doi:10.1101/gr.275989.121), 2021-10-19
Supplement: Supplemental_Figure_S12.pdf [file Supplemental_Figure_S12.pdf]

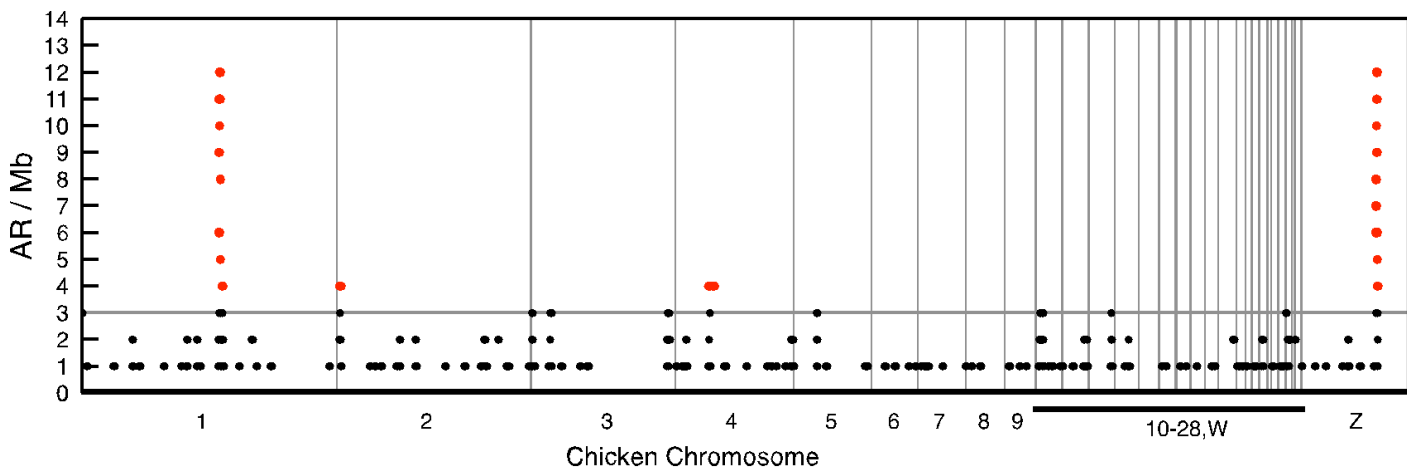

**Supplemental Figure S12. Genomic distribution of ARs on the oscine branch of vocal learning origin.** Density of ARs per 1Mb in 100kb sliding windows, significant enrichments over independence are red. Although, GC biased gene conversion was not identified in the oscine branch of origin for the ARs comprising the hotspot on Chromosome 1 it resides in a region of very high GC biased gene conversion in oscines overall (Supplementary Fig. S2) and should be interpreted with caution.
