# Supplementary material for: Positive selection in noncoding genomic regions of vocal learning birds is associated with genes implicated in vocal learning and speech functions in humans
Source: HighWire-hosted journal article supplement (doi:10.1101/gr.275989.121), 2021-10-19
Supplement: Supplemental_Figure_S13.pdf [file Supplemental_Figure_S13.pdf]

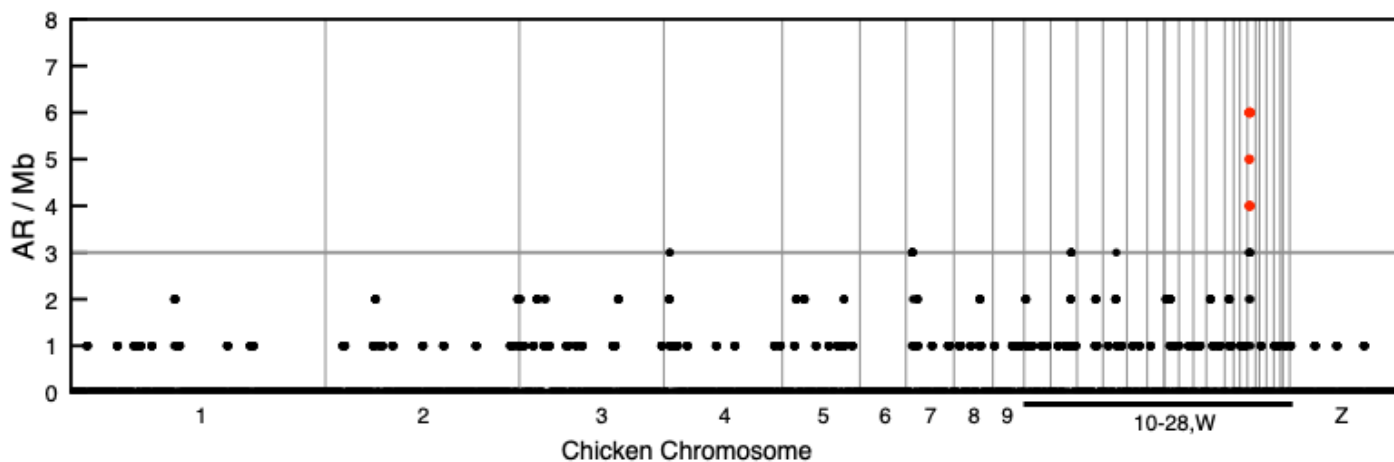

**Supplemental Figure S13. Genomic distribution of ARs on the parrot branch of vocal learning origin.** Density of ARs per 1Mb in 100kb sliding windows, significant enrichments over independence are red.
