# Supplementary material for: Positive selection in noncoding genomic regions of vocal learning birds is associated with genes implicated in vocal learning and speech functions in humans
Source: HighWire-hosted journal article supplement (doi:10.1101/gr.275989.121), 2021-10-19
Supplement: Supplemental_Figure_S16.pdf [file Supplemental_Figure_S16.pdf]

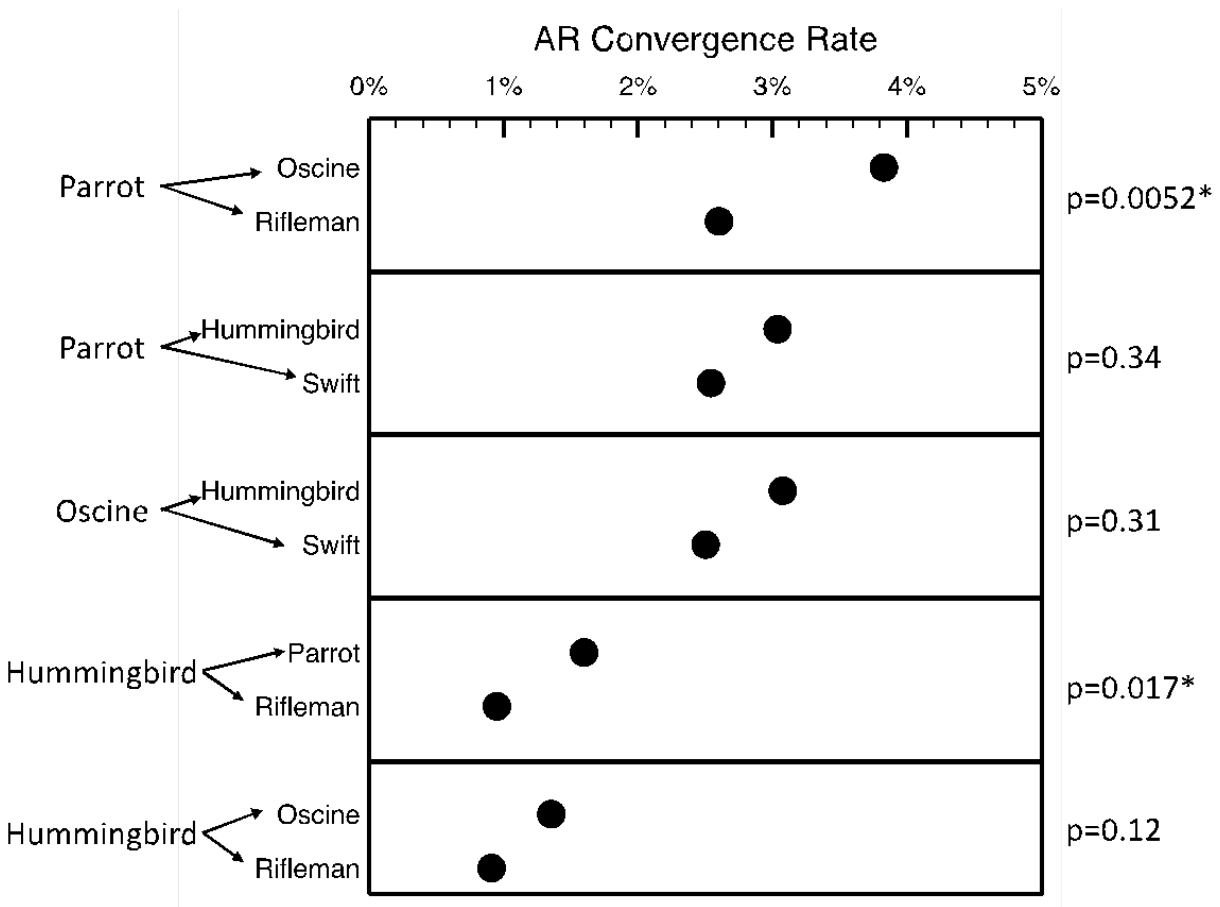

**Supplementary Figure S16.** Convergence between vocal learners compared to baseline expectations given by the rate of convergence with a similarly divergent non-learner. Dots indicate the rate of convergence as a percentage of convergent ARs per AR. Fisher's exact test p-values are given to the right to indicate statistical support for the two convergence tests being different.
