# Supplementary material for: Positive selection in noncoding genomic regions of vocal learning birds is associated with genes implicated in vocal learning and speech functions in humans
Source: HighWire-hosted journal article supplement (doi:10.1101/gr.275989.121), 2021-10-19
Supplement: Supplemental_Figure_S20.pdf [file Supplemental_Figure_S20.pdf]

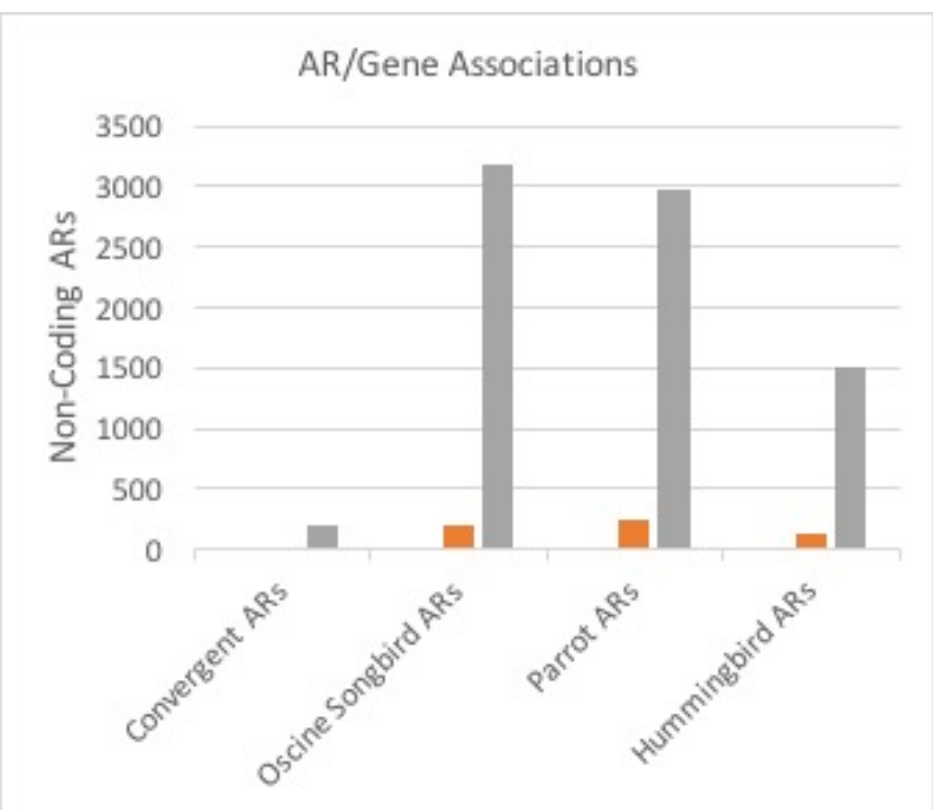

**Supplemental Figure S20. Gene Associations:** Our methodology for associating ARs with genes allows each AR to be associated with one or more genes. Most ARs are associated with 2 genes (grey), a small fraction (6-8%) of non-coding ARs are associated with only 1 gene (orange), 6 parrot ARs are not associated with any ARs (blue).
