# Supplementary material for: Positive selection in noncoding genomic regions of vocal learning birds is associated with genes implicated in vocal learning and speech functions in humans
Source: HighWire-hosted journal article supplement (doi:10.1101/gr.275989.121), 2021-10-19
Supplement: Supplemental_Table_S1.xlsx [file Supplemental_Table_S1.xlsx]

## Sheet: Sheet1
Supplemental Table S1: Metadata for the 33 genome sequences aligned for this study. (Romanov et al. 2011; Cai et al. 2013; Seabury et al. 2013; Shapiro et al. 2013; Doyle et al. 2014; Jarvis et al. 2014; Zhang et al. 2014; Koepfli et al. 2015; Korlach et al. 2017)
Species	Species Name	Vocal learner	Order	Family	Citation
Golden Eagle	Aquila chrysaetos		Accipitriformes	Accipitridae	Doyle et al. 2014
Mallard	Anas platyrhynchos		Anseriformes	Anatidae	Jarvis et al. 2014, Zhang et al. 2014
Anna's Hummingbird	Calypte anna	yes	Caprimulgiformes	Trochilidae	Korlach et al. 2017
Chimney Swift	Chaetura pelagica		Caprimulgiformes	Apodidae	Jarvis et al. 2014, Zhang et al. 2014
Chuck-Will's-Widow	Antrostomus carolinensis		Caprimulgiformes	Caprimulgidae	Jarvis et al. 2014, Zhang et al. 2014
Red-Legged Seriema	Cariama cristata		Cariamiformes	Cariamidae	Jarvis et al. 2014, Zhang et al. 2014
Killdeer	Charadrius vociferus		Charadriformes	Charadriidae	Jarvis et al. 2014, Zhang et al. 2014
Rock Dove	Columba livia		Columbiformes	Columbidae	Shapiro et al. 2013
Common Cuckoo	Cuculus canorus		Cuculiformes	Cuculidae	Jarvis et al. 2014, Zhang et al. 2014
Peregrine Falcon	Falco peregrinus		Falconiformes	Falconidae	Jarvis et al. 2014, Zhang et al. 2014
Greater Prairie Chicken	Tympanuchus cupido		Galliformes	Phasianidae	Revive & Restore Heath Hen De-extinction Team https://www.ncbi.nlm.nih.gov/bioproject/330991
Chicken	Gallus gallus		Galliformes	Phasianidae	Jarvis et al. 2014, Zhang et al. 2014
Hoatzin	Opisthocomus hoazin		Opisthocomiformes	Opisthocomidae	Jarvis et al. 2014, Zhang et al. 2014
American Crow	Corvus brachyrhynchos	yes	Passeriformes	Corvidae	Jarvis et al. 2014, Zhang et al. 2014
Zebra Finch	Taeniopygia guttata	yes	Passeriformes	Estrildidae	Korlach et al. 2017
Collared Flycatcher	Ficedula albicollis	yes	Passeriformes	Muscicapidae	Jarvis et al. 2014, Zhang et al. 2014
Tibetan Ground Jay	Pseudopodoces humilis	yes	Passeriformes	Paridae	Cai et al. 2011
White Throated Sparrow	Zonotrichia albicollis	yes	Passeriformes	Passerellidae	Romanov et al. 2011
Bowerbird	Ptilonorhynchus violaceus	yes	Passeriformes	Ptilonorhynchidae	unpublished
Medium Ground Finch	Geospiza fortis	yes	Passeriformes	Thraupidae	Jarvis et al. 2014, Zhang et al. 2014
Rifleman	Acanthisitta chloris		Passeriformes	Acanthisittidae	Jarvis et al. 2014, Zhang et al. 2014
Blue Crowned Manakin	Lepidothrix coronata		Passeriformes	Pipridae	https://www.ncbi.nlm.nih.gov/bioproject/338288
Golden Collared Manakin	Manacus vitellinus		Passeriformes	Pipridae	Jarvis et al. 2014, Zhang et al. 2014
Crested Ibis	Nipponia nippon		Pelecaniformes	Threskiornithidae	Jarvis et al. 2014, Zhang et al. 2014
American Flamingo	Phoenicopterus ruber ruber		Phoenicopteriformes	Phoenicopteridae	Jarvis et al. 2014, Zhang et al. 2014
Downy Woodpecker	Picoides pubescens		Piciformes	Picidae	Jarvis et al. 2014, Zhang et al. 2014
Scarlet Macaw	Ara macao	yes	Psittaciformes	Psittacidae	Seabury et al. 2013
Budgerigar	Melopsittacus undulatus	yes	Psittaciformes	Psittaculidae	Jarvis et al. 2014, Zhang et al. 2014
Kea	Nestor notabilis	yes	Psittaciformes	Strigopidae	Jarvis et al. 2014, Zhang et al. 2014
Kakapo	Strigops habroptila	yes	Psittaciformes	Strigopidae	Koepfli et al. 2015
Emperor Penguin	Aptenodytes forsteri		Sphenisciformes	Spheniscidae	Jarvis et al. 2014, Zhang et al. 2014
Ostrich	Struthio camelus australis		Struthioniformes	Struthionidae	Jarvis et al. 2014, Zhang et al. 2014
Tinamous	Tinamus guttatus		Tinamiformes	Tinamidae	Jarvis et al. 2014, Zhang et al. 2014
