# Supplementary material for: Positive selection in noncoding genomic regions of vocal learning birds is associated with genes implicated in vocal learning and speech functions in humans
Source: HighWire-hosted journal article supplement (doi:10.1101/gr.275989.121), 2021-10-19
Supplement: Supplemental_Table_S2.xlsx [file Supplemental_Table_S2.xlsx]

## Sheet: Sheet1
Supplemental Table S2: Numbers of accelerated regions observed in each lineage.
Test	Species	Cons. Elements	Acc. p≤0.05	Acc. q≤0.05	Exonic Acc. q≤0.05	Assoc. genes
Hummingbird	1	248283	45443	1795	158	1594
Oscine Songbirds	7	218598	41171	3608	226	2293
Parrots	4	249145	68121	3400	180	2006
VL Clade Convergent	12 (7,4,1)	259142	30710	223	7	297
American Flamingo	1	215056	11354	105	24	170
Killdeer	1	223975	11463	133	34	184
Core Waterbirds	2	214212	16725	147	34	236
Mallard	1	213531	20347	858	86	944
Waterbird Convergent	5 (1,1,2,1)	231254	7015	4	1	6
