# Supplementary material for: Positive selection in noncoding genomic regions of vocal learning birds is associated with genes implicated in vocal learning and speech functions in humans
Source: HighWire-hosted journal article supplement (doi:10.1101/gr.275989.121), 2021-10-19
Supplement: Supplemental_Table_S3.xlsx [file Supplemental_Table_S3.xlsx]

## Sheet: Legend
Supplemental Table S3: Locations and degree of acceleration for accelerated regions identified in this study. One tab per test.
Vocal Learning Clade tests		Species included in the test
Oscine Songbird		Zebra Finch, Medium Ground Finch, White Throated Sparrow, Collared Flycatcher, Tibetan Ground Tit, American Crow, Satin Bowerbird
Parrot		Scarlet Macaw, Budgerigar, Kea, Kakapo
Hummingbird		Anna's Hummingbird
Waterbird control groups at non-waterbird conserved elements
Mallard
Core Waterbirds		Emperor Penguin, Crested Ibis
Killdeer
American Flamingo
Vocal Learning branch of origin tests
Oscine Branch		Zebra Finch, Medium Ground Finch, White Throated Sparrow, Collared Flycatcher, Tibetan Ground Tit, American Crow, Satin Bowerbird
Parrot Branch		Scarlet Macaw, Budgerigar, Kea, Kakapo
Non-learners at vocal non-learner conserved elements
Manakins		Blue Crowned Manakin, Golden Collared Manakin
Blue Crowned Manakin
Golden Collared Manakin
Rifleman
Peregrine Falcon
Red Legged Seriema
Downy Woodpecker
Golden Eagle
Crested Ibis
Emperor Pengiun
Killdeer_NVL
Hoatzin
Chimney Swift
Chuck Will's Widow
Common Cuckoo
American Flamingo NVL
Rock Dove
Chicken
Greater Prairie Chicken
Mallard NVL
Ostrich
White Throated Tinamous

## Sheet: Oscine Songbird
Chicken Chromosome	Start	End	Unique ID	Null Scale (neutral)	Alt Scale (accelerated)	Alt Subscale (Degree of Acceleration)	lnl-Ratio (Significance)	p-value	FDR q-value
NC_006088.4	364404	364631	NC_006088.4.1-90000000.670	0.34061	0.20589	5.07075	46.9014	0	0
NC_006088.4	992401	992563	NC_006088.4.1-90000000.2393	0.21979	0.142	4.00339	20.2129	0	0
NC_006088.4	1198373	1198512	NC_006088.4.1-90000000.3212	0.31513	0.25069	3.01823	11.5609	0	0.037518
NC_006088.4	1812651	1812758	NC_006088.4.1-90000000.5321	0.54836	0.36755	3.9704	25.8782	0	0
NC_006088.4	3920147	3920273	NC_006088.4.1-90000000.13156	0.37834	0.27424	2.97532	14.596	0	0.00998135
NC_006088.4	4589358	4589458	NC_006088.4.1-90000000.16229	0.40587	0.30085	2.92759	12.1878	0	0.0268987
NC_006088.4	5009180	5009282	NC_006088.4.1-90000000.18195	0.6454	0.43325	3.76715	26.8975	0	0
NC_006088.4	5058480	5058797	NC_006088.4.1-90000000.18325	0.31433	0.24167	2.67566	23.888	0	0
NC_006088.4	5115920	5116123	NC_006088.4.1-90000000.18539	0.40507	0.33577	2.11909	11.2741	0	0.0413202
NC_006088.4	5188938	5189064	NC_006088.4.1-90000000.18757	0.26	0.18061	3.41661	14.1194	0	0.0127202
NC_006088.4	5420896	5421082	NC_006088.4.1-90000000.19564	0.39903	0.32387	2.28078	12.0012	0	0.0302964
NC_006088.4	5704312	5704597	NC_006088.4.1-90000000.20854	0.3017	0.24718	2.21456	13.8026	0	0.0146699
NC_006088.4	5706840	5707135	NC_006088.4.1-90000000.20875	0.35587	0.26606	2.76105	28.2889	0	0
NC_006088.4	6759088	6759219	NC_006088.4.1-90000000.25676	0.48684	0.39089	2.36498	11.487	0	0.0380056
NC_006088.4	7319062	7319245	NC_006088.4.1-90000000.28695	0.4766	0.39139	2.206	13.3925	0	0.015854
NC_006088.4	7645945	7646126	NC_006088.4.1-90000000.29940	0.47972	0.38313	2.37104	15.4703	0	0.00604209
NC_006088.4	8615831	8616070	NC_006088.4.1-90000000.33439	0.30739	0.24174	2.49119	15.7612	0	0.00529183
NC_006088.4	8629272	8629443	NC_006088.4.1-90000000.33492	0.4852	0.38501	2.20681	12.1962	0	0.0268987
NC_006088.4	9351659	9351789	NC_006088.4.1-90000000.36384	0.38437	0.25171	3.92644	26.43	0	0
NC_006088.4	9507276	9507464	NC_006088.4.1-90000000.36762	0.35113	0.28323	2.29178	11.8324	0	0.031507
NC_006088.4	10134055	10134156	NC_006088.4.1-90000000.38362	0.51002	0.39553	2.57435	11.6979	0	0.0348432
NC_006088.4	10666407	10666524	NC_006088.4.1-90000000.40037	0.59247	0.47215	2.38329	12.3188	0	0.0268336
NC_006088.4	10678881	10679029	NC_006088.4.1-90000000.40086	0.36986	0.2871	2.56842	12.7086	0	0.0228238
NC_006088.4	10898770	10898970	NC_006088.4.1-90000000.40690	0.45236	0.35807	2.39769	16.8295	0	0.00374665
NC_006088.4	11132022	11132193	NC_006088.4.1-90000000.41644	0.39351	0.30596	2.59928	15.7598	0	0.00529183
NC_006088.4	11452031	11452168	NC_006088.4.1-90000000.42564	0.54954	0.42127	2.60378	16.5211	0	0.00529183
NC_006088.4	11837040	11837171	NC_006088.4.1-90000000.43828	0.5181	0.40099	2.637	15.6974	0	0.00529183
NC_006088.4	11994544	11994732	NC_006088.4.1-90000000.44376	0.42828	0.35418	2.14789	11.3931	0	0.0391986
NC_006088.4	12249029	12249177	NC_006088.4.1-90000000.45308	0.5549	0.44411	2.27646	13.2348	0	0.0169766
NC_006088.4	13436867	13437025	NC_006088.4.1-90000000.49454	0.44491	0.31071	3.51389	29.9594	0	0
NC_006088.4	13505350	13505521	NC_006088.4.1-90000000.49814	0.36568	0.25679	3.28995	23.7981	0	0
NC_006088.4	13801905	13802122	NC_006088.4.1-90000000.50957	0.27846	0.21784	2.50488	13.5997	0	0.015854
NC_006088.4	14479911	14480012	NC_006088.4.1-90000000.53460	0.35306	0.2535	3.16131	12.6388	0	0.0233309
NC_006088.4	14808357	14808490	NC_006088.4.1-90000000.54685	0.41559	0.32945	2.43222	11.3744	0	0.039693
NC_006088.4	15454085	15454190	NC_006088.4.1-90000000.57172	0.54878	0.43013	2.62859	11.8992	0	0.031507
NC_006088.4	15492634	15492737	NC_006088.4.1-90000000.57369	0.58971	0.43065	2.88128	16.1857	0	0.00529183
NC_006088.4	15649273	15649431	NC_006088.4.1-90000000.57818	0.43656	0.32348	2.95294	20.356	0	0
NC_006088.4	16099141	16099368	NC_006088.4.1-90000000.59871	0.38627	0.30879	2.36797	16.6263	0	0.00529183
NC_006088.4	16504234	16504418	NC_006088.4.1-90000000.61138	0.3562	0.26322	2.91831	20.1887	0	0
NC_006088.4	17055453	17055643	NC_006088.4.1-90000000.62358	0.46645	0.37813	2.26523	14.8515	0	0.00758223
NC_006088.4	17130032	17130196	NC_006088.4.1-90000000.62604	0.42894	0.33082	2.55098	15.0144	0	0.00667579
NC_006088.4	17341841	17341945	NC_006088.4.1-90000000.63381	0.54561	0.39777	3.04818	15.9734	0	0.00529183
NC_006088.4	17364887	17365028	NC_006088.4.1-90000000.63461	0.37707	0.29361	2.54642	11.81	0	0.0331198
NC_006088.4	17373697	17373921	NC_006088.4.1-90000000.63498	0.28687	0.22957	2.35608	12.1449	0	0.0280475
NC_006088.4	17557087	17557273	NC_006088.4.1-90000000.64093	0.51383	0.39928	2.55439	20.0379	0	0
NC_006088.4	18363069	18363446	NC_006088.4.1-90000000.65278	0.43516	0.36052	2.12033	22.3221	0	0
NC_006088.4	18545767	18546095	NC_006088.4.1-90000000.65576	0.39279	0.3099	2.39704	23.6378	0	0
NC_006088.4	18613950	18614066	NC_006088.4.1-90000000.65709	0.45698	0.30714	3.91636	24.6831	0	0
NC_006088.4	18620548	18620663	NC_006088.4.1-90000000.65718	0.46118	0.30996	3.91623	24.6783	0	0
NC_006088.4	19067298	19067596	NC_006088.4.1-90000000.67006	0.40217	0.33517	2.17584	16.5798	0	0.00529183
NC_006088.4	19212488	19212695	NC_006088.4.1-90000000.67569	0.51596	0.42518	2.17217	15.1372	0	0.00667579
NC_006088.4	19372027	19372216	NC_006088.4.1-90000000.68023	0.4507	0.34555	2.68767	21.8906	0	0
NC_006088.4	19449432	19449694	NC_006088.4.1-90000000.68245	0.37876	0.27104	3.21476	35.6397	0	0
NC_006088.4	19483797	19484074	NC_006088.4.1-90000000.68332	0.39774	0.31604	2.41305	21.27	0	0
NC_006088.4	19676985	19677143	NC_006088.4.1-90000000.68825	0.37419	0.28667	2.6775	14.8203	0	0.00758223
NC_006088.4	19858753	19858934	NC_006088.4.1-90000000.69287	0.34301	0.26542	2.59643	14.2502	0	0.0120389
NC_006088.4	19913054	19913179	NC_006088.4.1-90000000.69470	0.43525	0.34096	2.52238	11.3938	0	0.0391986
NC_006088.4	19915557	19915946	NC_006088.4.1-90000000.69479	0.37366	0.32257	1.84414	12.6723	0	0.0233309
NC_006088.4	19931033	19931168	NC_006088.4.1-90000000.69545	0.37293	0.29308	2.62481	11.4085	0	0.0391986
NC_006088.4	19968841	19969088	NC_006088.4.1-90000000.69664	0.29005	0.23833	2.17742	11.0581	0	0.0475966
NC_006088.4	20592645	20592796	NC_006088.4.1-90000000.72153	0.44619	0.33837	2.85259	17.445	0	0.00257932
NC_006088.4	20750757	20750937	NC_006088.4.1-90000000.73154	0.37982	0.29925	2.43819	14.4388	0	0.0120389
NC_006088.4	20931911	20932106	NC_006088.4.1-90000000.73970	0.31819	0.22679	3.14913	21.6265	0	0
NC_006088.4	20935869	20935969	NC_006088.4.1-90000000.73983	0.35168	0.24392	3.57252	14.7208	0	0.00998135
NC_006088.4	20973436	20973581	NC_006088.4.1-90000000.74190	0.48139	0.36736	2.68533	17.1758	0	0.00257932
NC_006088.4	21001872	21001980	NC_006088.4.1-90000000.74305	0.4778	0.36686	2.59619	12.0285	0	0.0298894
NC_006088.4	21135855	21135960	NC_006088.4.1-90000000.74763	0.30786	0.2107	3.5198	14.195	0	0.0120389
NC_006088.4	21878176	21878365	NC_006088.4.1-90000000.76288	0.45888	0.36433	2.33391	15.377	0	0.00604209
NC_006088.4	22294539	22294646	NC_006088.4.1-90000000.77643	0.38881	0.26457	3.49049	17.3476	0	0.00257932
NC_006088.4	22295231	22295431	NC_006088.4.1-90000000.77649	0.42037	0.3046	2.92861	21.5322	0	0
NC_006088.4	22295435	22295581	NC_006088.4.1-90000000.77650	0.37192	0.26252	3.11411	16.646	0	0.00529183
NC_006088.4	22295678	22295797	NC_006088.4.1-90000000.77652	0.45562	0.34387	2.70658	12.0504	0	0.0298894
NC_006088.4	22296134	22296259	NC_006088.4.1-90000000.77654	0.44331	0.33951	2.74905	14.2612	0	0.0120389
NC_006088.4	22296909	22297083	NC_006088.4.1-90000000.77657	0.35532	0.27842	3.79439	19.4373	0	0
NC_006088.4	22300374	22300501	NC_006088.4.1-90000000.77667	0.46841	0.32156	3.49423	25.3256	0	0
NC_006088.4	22858391	22858521	NC_006088.4.1-90000000.79394	0.49952	0.38712	2.51908	13.0995	0	0.0183368
NC_006088.4	22863051	22863186	NC_006088.4.1-90000000.79399	0.4941	0.37563	2.69992	17.5162	0	0.00257932
NC_006088.4	23061406	23061713	NC_006088.4.1-90000000.80130	0.25801	0.21382	2.12746	11.0347	0	0.048906
NC_006088.4	23301539	23301705	NC_006088.4.1-90000000.80855	0.36368	0.2683	2.92987	18.7657	0	0
NC_006088.4	23336309	23336502	NC_006088.4.1-90000000.80988	0.34406	0.27232	2.44444	13.4989	0	0.015854
NC_006088.4	23486788	23486902	NC_006088.4.1-90000000.81553	0.58157	0.45415	2.52026	13.5928	0	0.015854
NC_006088.4	23508279	23508386	NC_006088.4.1-90000000.81615	0.49283	0.38748	2.48528	11.4932	0	0.037518
NC_006088.4	23533938	23534083	NC_006088.4.1-90000000.81736	0.24591	0.16822	3.47358	14.9459	0	0.00667579
NC_006088.4	23763654	23763896	NC_006088.4.1-90000000.82556	0.48858	0.41623	2.00255	12.4962	0	0.025365
NC_006088.4	24016516	24016699	NC_006088.4.1-90000000.83140	0.39801	0.32164	2.31712	12.8429	0	0.0204559
NC_006088.4	24258855	24259022	NC_006088.4.1-90000000.83692	0.38224	0.28019	2.99234	20.656	0	0
NC_006088.4	24268367	24268567	NC_006088.4.1-90000000.83728	0.46321	0.37648	2.25859	14.4359	0	0.0120389
NC_006088.4	24647943	24648093	NC_006088.4.1-90000000.85104	0.498	0.39908	2.30263	12.8104	0	0.0217041
NC_006088.4	25017557	25017738	NC_006088.4.1-90000000.86716	0.39358	0.30018	2.76069	18.1752	0	0
NC_006088.4	25242352	25242523	NC_006088.4.1-90000000.87547	0.36113	0.19431	5.79435	53.6994	0	0
NC_006088.4	25269217	25269331	NC_006088.4.1-90000000.87642	0.56302	0.43814	2.54195	13.3631	0	0.015854
NC_006088.4	25269751	25269943	NC_006088.4.1-90000000.87645	0.36621	0.2692	3.00724	21.1905	0	0
NC_006088.4	25386850	25387022	NC_006088.4.1-90000000.88129	0.308	0.22044	3.18584	19.2341	0	0
NC_006088.4	25390522	25390868	NC_006088.4.1-90000000.88146	0.35373	0.30317	1.9653	12.5823	0	0.0250665
NC_006088.4	25406545	25406715	NC_006088.4.1-90000000.88203	0.60357	0.42209	3.25571	30.7561	0	0
NC_006088.4	25420223	25420326	NC_006088.4.1-90000000.88285	0.38086	0.28668	2.83175	11.191	0	0.0434679
NC_006088.4	25454548	25454851	NC_006088.4.1-90000000.88469	0.21774	0.17536	2.31528	11.5595	0	0.037518
NC_006088.4	25463718	25463840	NC_006088.4.1-90000000.88509	0.4845	0.37108	2.68852	14.8545	0	0.00758223
NC_006088.4	25464215	25464367	NC_006088.4.1-90000000.88513	0.37355	0.25251	3.62133	23.1978	0	0
NC_006088.4	25487066	25487201	NC_006088.4.1-90000000.88609	0.39721	0.31066	2.57565	11.4129	0	0.0391986
NC_006088.4	25491072	25491174	NC_006088.4.1-90000000.88630	0.50024	0.36838	2.9283	15.4433	0	0.00604209
NC_006088.4	25505266	25505541	NC_006088.4.1-90000000.88683	0.40945	0.34074	2.08553	14.5606	0	0.00998135
NC_006088.4	25514131	25514236	NC_006088.4.1-90000000.88716	0.28024	0.19355	3.4424	12.6823	0	0.0233309
NC_006088.4	25528899	25529006	NC_006088.4.1-90000000.88795	0.48022	0.33322	3.40267	21.055	0	0
NC_006088.4	25547496	25547890	NC_006088.4.1-90000000.88883	0.22662	0.1832	2.28011	14.7872	0	0.00941222
NC_006088.4	25601641	25601781	NC_006088.4.1-90000000.89151	0.41255	0.31989	2.93461	15.7379	0	0.00529183
NC_006088.4	25602654	25602872	NC_006088.4.1-90000000.89160	0.45198	0.35581	2.48164	20.6288	0	0
NC_006088.4	25603967	25604718	NC_006088.4.1-90000000.89167	0.22473	0.19774	1.73547	12.0217	0	0.0298894
NC_006088.4	25606025	25607122	NC_006088.4.1-90000000.89169	0.17608	0.15425	1.7659	14.8462	0	0.00758223
NC_006088.4	25630751	25630974	NC_006088.4.1-90000000.89268	0.32783	0.24756	2.75482	19.5924	0	0
NC_006088.4	25672298	25672425	NC_006088.4.1-90000000.89435	0.41833	0.29028	3.47252	22.9887	0	0
NC_006088.4	25725130	25725264	NC_006088.4.1-90000000.89684	0.40479	0.30262	2.84672	15.6264	0	0.00529183
NC_006088.4	25732220	25732328	NC_006088.4.1-90000000.89722	0.54403	0.39555	3.08845	19.2081	0	0
NC_006088.4	25817817	25817997	NC_006088.4.1-90000000.90074	0.36656	0.28684	2.54341	14.3089	0	0.0120389
NC_006088.4	25835694	25835808	NC_006088.4.1-90000000.90171	0.47619	0.3437	3.04317	17.1925	0	0.00257932
NC_006088.4	25839502	25839620	NC_006088.4.1-90000000.90187	0.39336	0.30246	2.63038	11.1427	0	0.0448666
NC_006088.4	25840081	25840201	NC_006088.4.1-90000000.90193	0.35943	0.27001	2.80073	12.0782	0	0.029537
NC_006088.4	25842654	25843250	NC_006088.4.1-90000000.90203	0.27165	0.21772	2.34255	29.6543	0	0
NC_006088.4	25845202	25845360	NC_006088.4.1-90000000.90210	0.52449	0.38601	2.98509	24.8275	0	0
NC_006088.4	25845689	25845907	NC_006088.4.1-90000000.90215	0.38556	0.3122	2.28384	14.1997	0	0.0120389
NC_006088.4	26030114	26030214	NC_006088.4.1-90000000.90892	0.4885	0.35388	3.27794	16.9552	0	0.00374665
NC_006088.4	26038489	26038782	NC_006088.4.1-90000000.90935	0.14605	0.10979	2.80081	12.158	0	0.0280475
NC_006088.4	26164612	26164805	NC_006088.4.1-90000000.91483	0.45696	0.32401	3.33799	28.7763	0	0
NC_006088.4	26193550	26193795	NC_006088.4.1-90000000.91592	0.49483	0.40356	2.22914	18.7954	0	0
NC_006088.4	26200229	26200373	NC_006088.4.1-90000000.91609	0.39917	0.31296	2.4288	11.1049	0	0.045665
NC_006088.4	26329605	26329777	NC_006088.4.1-90000000.92091	0.33908	0.26729	2.46674	12.1741	0	0.0268987
NC_006088.4	26418795	26418901	NC_006088.4.1-90000000.92514	0.51488	0.40207	2.56126	11.8398	0	0.031507
NC_006088.4	26444205	26444308	NC_006088.4.1-90000000.92583	0.40695	0.29096	3.17207	14.108	0	0.0127202
NC_006088.4	26648291	26648419	NC_006088.4.1-90000000.93281	0.45954	0.36868	2.48228	11.0677	0	0.047139
NC_006088.4	26648422	26648673	NC_006088.4.1-90000000.93282	0.40839	0.34066	2.30884	15.3695	0	0.00604209
NC_006088.4	26706071	26706228	NC_006088.4.1-90000000.93619	0.34087	0.25509	2.84801	15.4422	0	0.00604209
NC_006088.4	26721103	26721205	NC_006088.4.1-90000000.93682	0.40643	0.29697	3.00301	13.3949	0	0.015854
NC_006088.4	26749834	26750034	NC_006088.4.1-90000000.93817	0.36868	0.30097	2.22686	11.5808	0	0.037518
NC_006088.4	27332493	27332670	NC_006088.4.1-90000000.95586	0.32731	0.24793	2.73303	15.4491	0	0.00604209
NC_006088.4	27581718	27581878	NC_006088.4.1-90000000.96361	0.44966	0.32445	3.1139	24.4965	0	0
NC_006088.4	27601679	27601810	NC_006088.4.1-90000000.96414	0.43368	0.31327	3.24365	19.1869	0	0
NC_006088.4	28649121	28649295	NC_006088.4.1-90000000.98856	0.39614	0.31396	2.40852	13.5087	0	0.015854
NC_006088.4	29025643	29025756	NC_006088.4.1-90000000.100141	0.3876	0.29716	2.75338	11.0794	0	0.046137
NC_006088.4	29163304	29163710	NC_006088.4.1-90000000.100686	0.32993	0.27167	2.1723	19.8272	0	0
NC_006088.4	29180212	29180367	NC_006088.4.1-90000000.100795	0.48698	0.38539	2.43638	14.6865	0	0.00998135
NC_006088.4	29181914	29182097	NC_006088.4.1-90000000.100811	0.42408	0.33347	2.49683	16.4925	0	0.00529183
NC_006088.4	29348616	29348940	NC_006088.4.1-90000000.101723	0.30044	0.24792	2.1478	14.2077	0	0.0120389
NC_006088.4	29363740	29364075	NC_006088.4.1-90000000.101805	0.19016	0.13521	3.21602	24.3659	0	0
NC_006088.4	29840876	29841054	NC_006088.4.1-90000000.103997	0.59905	0.45212	2.83043	28.4324	0	0
NC_006088.4	29871908	29872025	NC_006088.4.1-90000000.104170	0.53664	0.41913	2.5358	13.5191	0	0.015854
NC_006088.4	29881389	29881561	NC_006088.4.1-90000000.104224	0.3931	0.31606	2.33225	12.073	0	0.029537
NC_006088.4	30048005	30048205	NC_006088.4.1-90000000.104819	0.48186	0.39097	2.27188	15.467	0	0.00604209
NC_006088.4	30408700	30408880	NC_006088.4.1-90000000.106207	0.47991	0.39536	2.15498	12.1344	0	0.0291028
NC_006088.4	30706584	30706694	NC_006088.4.1-90000000.107294	0.33681	0.23128	3.69743	16.2993	0	0.00529183
NC_006088.4	31607856	31608084	NC_006088.4.1-90000000.110395	0.46327	0.38324	2.13088	14.7798	0	0.00941222
NC_006088.4	31694090	31694204	NC_006088.4.1-90000000.110657	0.43103	0.31891	2.95574	15.0626	0	0.00667579
NC_006088.4	32052424	32052543	NC_006088.4.1-90000000.111699	0.51215	0.40246	2.5003	13.3072	0	0.015854
NC_006088.4	32175807	32175951	NC_006088.4.1-90000000.112044	0.44422	0.3564	2.38177	11.7053	0	0.0348432
NC_006088.4	32574615	32574739	NC_006088.4.1-90000000.112735	0.52808	0.4091	2.42273	12.089	0	0.0291028
NC_006088.4	32710713	32710824	NC_006088.4.1-90000000.113082	0.51707	0.40384	2.53183	11.7086	0	0.0348432
NC_006088.4	32830650	32830766	NC_006088.4.1-90000000.113572	0.53913	0.41304	2.7124	15.1576	0	0.00667579
NC_006088.4	32846760	32847041	NC_006088.4.1-90000000.113641	0.34551	0.28223	2.22455	15.7561	0	0.00529183
NC_006088.4	33099534	33099813	NC_006088.4.1-90000000.114434	0.26531	0.21572	2.24318	11.6625	0	0.035391
NC_006088.4	33120341	33120677	NC_006088.4.1-90000000.114592	0.28804	0.24363	1.99148	11.2519	0	0.0417833
NC_006088.4	33463494	33463619	NC_006088.4.1-90000000.115632	0.48013	0.33948	3.39181	23.7022	0	0
NC_006088.4	33701676	33701883	NC_006088.4.1-90000000.116577	0.344	0.27381	2.39659	13.9462	0	0.0138965
NC_006088.4	34054388	34054598	NC_006088.4.1-90000000.117887	0.49876	0.38363	2.58624	20.395	0	0
NC_006088.4	34094582	34094682	NC_006088.4.1-90000000.118153	0.57325	0.43947	2.57152	11.7406	0	0.0339651
NC_006088.4	34114211	34114319	NC_006088.4.1-90000000.118277	0.34911	0.24522	3.29566	14.3581	0	0.0120389
NC_006088.4	34135473	34135659	NC_006088.4.1-90000000.118394	0.37617	0.29596	2.55436	15.5289	0	0.00604209
NC_006088.4	34160832	34161071	NC_006088.4.1-90000000.118527	0.29566	0.22956	2.58058	15.9388	0	0.00529183
NC_006088.4	34173755	34173963	NC_006088.4.1-90000000.118585	0.35623	0.27734	2.65628	17.7614	0	0.00137049
NC_006088.4	34239096	34239360	NC_006088.4.1-90000000.118931	0.403	0.30748	2.71724	23.4566	0	0
NC_006088.4	34313899	34314058	NC_006088.4.1-90000000.119370	0.4052	0.31572	2.59719	13.0419	0	0.0189173
NC_006088.4	35014263	35014421	NC_006088.4.1-90000000.122095	0.48316	0.38254	2.45589	13.7102	0	0.0152815
NC_006088.4	35191300	35191499	NC_006088.4.1-90000000.122833	0.42102	0.33404	2.42184	16.1465	0	0.00529183
NC_006088.4	35755955	35756083	NC_006088.4.1-90000000.124813	0.3958	0.24628	4.13165	27.738	0	0
NC_006088.4	35971348	35971567	NC_006088.4.1-90000000.125641	0.32153	0.22936	3.18768	25.6603	0	0
NC_006088.4	37000467	37000718	NC_006088.4.1-90000000.129426	0.34285	0.25963	2.8598	23.973	0	0
NC_006088.4	37059469	37059709	NC_006088.4.1-90000000.129591	0.45118	0.36346	2.33041	18.7087	0	0
NC_006088.4	37127153	37127362	NC_006088.4.1-90000000.129712	0.37818	0.30357	2.38824	14.6229	0	0.00998135
NC_006088.4	37311358	37311524	NC_006088.4.1-90000000.130144	0.4886	0.38233	2.50616	15.914	0	0.00529183
NC_006088.4	37406888	37407002	NC_006088.4.1-90000000.130390	0.43749	0.32405	2.73222	12.838	0	0.0211308
NC_006088.4	38517771	38517942	NC_006088.4.1-90000000.133960	0.32682	0.24973	2.70649	14.7944	0	0.00941222
NC_006088.4	38658436	38658620	NC_006088.4.1-90000000.134416	0.34468	0.27467	2.38896	12.4577	0	0.025365
NC_006088.4	38703457	38703566	NC_006088.4.1-90000000.134664	0.56576	0.44693	2.63734	12.8446	0	0.0204559
NC_006088.4	38704072	38704214	NC_006088.4.1-90000000.134668	0.41241	0.27088	3.91725	31.3078	0	0
NC_006088.4	38854098	38854316	NC_006088.4.1-90000000.135250	0.47592	0.3934	2.06142	12.1519	0	0.0280475
NC_006088.4	38862171	38862281	NC_006088.4.1-90000000.135293	0.56068	0.41665	2.93269	18.5009	0	0
NC_006088.4	38872182	38872373	NC_006088.4.1-90000000.135350	0.40612	0.31315	2.60533	18.1134	0	0
NC_006088.4	39014048	39014174	NC_006088.4.1-90000000.135989	0.56857	0.45039	2.4261	12.6587	0	0.0233309
NC_006088.4	39039927	39040032	NC_006088.4.1-90000000.136071	0.50062	0.38718	2.61277	11.8076	0	0.0331198
NC_006088.4	39329629	39329867	NC_006088.4.1-90000000.137197	0.25073	0.19315	2.6494	14.3203	0	0.0120389
NC_006088.4	39401261	39401403	NC_006088.4.1-90000000.137576	0.48913	0.38827	2.45145	13.9285	0	0.0138965
NC_006088.4	39724699	39724935	NC_006088.4.1-90000000.138698	0.35401	0.27022	2.69758	21.6165	0	0
NC_006088.4	39974637	39974805	NC_006088.4.1-90000000.139646	0.32656	0.24416	2.84396	16.2282	0	0.00529183
NC_006088.4	40385984	40386110	NC_006088.4.1-90000000.140822	0.55018	0.43365	2.514	13.8746	0	0.0138965
NC_006088.4	40594580	40594685	NC_006088.4.1-90000000.141319	0.50274	0.3853	2.57835	11.5781	0	0.037518
NC_006088.4	40726835	40726999	NC_006088.4.1-90000000.141641	0.55877	0.41978	2.7905	23.6158	0	0
NC_006088.4	40796073	40796313	NC_006088.4.1-90000000.141909	0.40361	0.32693	2.28205	16.9716	0	0.00374665
NC_006088.4	40809737	40810132	NC_006088.4.1-90000000.141978	0.44213	0.37245	2.00889	19.8422	0	0
NC_006088.4	40948030	40948138	NC_006088.4.1-90000000.142661	0.40747	0.30689	2.79934	12.0823	0	0.029537
NC_006088.4	40993815	40994129	NC_006088.4.1-90000000.142864	0.38011	0.30588	2.30899	20.894	0	0
NC_006088.4	41179643	41179800	NC_006088.4.1-90000000.143478	0.51876	0.38349	2.94795	24.5868	0	0
NC_006088.4	41180664	41180774	NC_006088.4.1-90000000.143486	0.56048	0.41505	2.77661	15.9634	0	0.00529183
NC_006088.4	41720749	41720860	NC_006088.4.1-90000000.144532	0.39813	0.28667	2.98621	13.6423	0	0.015854
NC_006088.4	41720880	41721026	NC_006088.4.1-90000000.144534	0.47364	0.34554	2.91917	19.9093	0	0
NC_006088.4	41780340	41780830	NC_006088.4.1-90000000.144685	0.2071	0.17626	1.94256	11.0397	0	0.048906
NC_006088.4	42206177	42206328	NC_006088.4.1-90000000.145866	0.48248	0.33685	3.54364	27.9027	0	0
NC_006088.4	43466045	43466191	NC_006088.4.1-90000000.148848	0.32632	0.24119	2.9165	14.366	0	0.0120389
NC_006088.4	43549114	43549232	NC_006088.4.1-90000000.149163	0.42334	0.32329	2.72426	12.7104	0	0.0228238
NC_006088.4	43567271	43567502	NC_006088.4.1-90000000.149246	0.36505	0.30534	2.06444	11.2071	0	0.0430531
NC_006088.4	43605749	43605862	NC_006088.4.1-90000000.149452	0.5625	0.37779	3.38652	23.7837	0	0
NC_006088.4	44404331	44404527	NC_006088.4.1-90000000.151885	0.31802	0.25118	2.36605	11.4017	0	0.0391986
NC_006088.4	44438041	44438238	NC_006088.4.1-90000000.152040	0.37724	0.29786	2.41783	14.6535	0	0.00998135
NC_006088.4	44443773	44443894	NC_006088.4.1-90000000.152074	0.37633	0.28512	2.67361	11.0646	0	0.0475966
NC_006088.4	44448669	44448810	NC_006088.4.1-90000000.152086	0.45002	0.36744	2.40116	11.1239	0	0.0452923
NC_006088.4	44668981	44669091	NC_006088.4.1-90000000.152898	0.48599	0.37201	2.54963	11.1237	0	0.0452923
NC_006088.4	44736859	44737012	NC_006088.4.1-90000000.153156	0.34208	0.25979	2.72985	14.0968	0	0.0127202
NC_006088.4	44901206	44901415	NC_006088.4.1-90000000.153726	0.36481	0.28205	2.60366	17.5402	0	0.00257932
NC_006088.4	44909392	44909510	NC_006088.4.1-90000000.153769	0.5449	0.42997	2.48582	13.1875	0	0.0169766
NC_006088.4	45623186	45623306	NC_006088.4.1-90000000.156631	0.36551	0.27426	3.0293	13.7092	0	0.0152815
NC_006088.4	46301121	46301390	NC_006088.4.1-90000000.159499	0.2704	0.22199	2.17594	11.1927	0	0.0430531
NC_006088.4	46423288	46423484	NC_006088.4.1-90000000.160066	0.50522	0.40623	2.43123	18.9432	0	0
NC_006088.4	46439348	46439620	NC_006088.4.1-90000000.160152	0.44171	0.37882	1.89816	11.4497	0	0.038365
NC_006088.4	46484397	46484567	NC_006088.4.1-90000000.160397	0.4499	0.34886	2.58284	17.8487	0	0.00137049
NC_006088.4	46502489	46502829	NC_006088.4.1-90000000.160498	0.43513	0.34671	2.4892	30.0893	0	0
NC_006088.4	46504359	46504557	NC_006088.4.1-90000000.160504	0.23791	0.17958	2.7704	13.113	0	0.0183368
NC_006088.4	46508353	46508645	NC_006088.4.1-90000000.160529	0.36545	0.31162	1.95276	11.3717	0	0.039693
NC_006088.4	46523202	46523355	NC_006088.4.1-90000000.160631	0.35268	0.26591	3.41182	18.0523	0	0.00137049
NC_006088.4	46579010	46579204	NC_006088.4.1-90000000.160936	0.26656	0.18976	3.28095	19.9619	0	0
NC_006088.4	46650356	46650507	NC_006088.4.1-90000000.161366	0.51949	0.40971	2.51916	14.4295	0	0.0120389
NC_006088.4	46925531	46925699	NC_006088.4.1-90000000.162567	0.45688	0.35462	2.56166	17.3771	0	0.00257932
NC_006088.4	46963334	46963561	NC_006088.4.1-90000000.162736	0.33302	0.26388	2.45693	15.119	0	0.00667579
NC_006088.4	47109664	47109934	NC_006088.4.1-90000000.163143	0.4052	0.29575	3.01217	34.5014	0	0
NC_006088.4	48526934	48527202	NC_006088.4.1-90000000.168580	0.40547	0.34162	2.02857	13.2439	0	0.0169766
NC_006088.4	48534824	48534947	NC_006088.4.1-90000000.168630	0.46487	0.35894	2.59169	13.0985	0	0.0183368
NC_006088.4	49113156	49113302	NC_006088.4.1-90000000.171049	0.19094	0.1331	3.3354	11.6907	0	0.0348432
NC_006088.4	50158128	50158332	NC_006088.4.1-90000000.176723	0.26153	0.18328	3.32875	22.1112	0	0
NC_006088.4	52340596	52340871	NC_006088.4.1-90000000.190033	0.37727	0.304	2.31385	17.6997	0	0.00137049
NC_006088.4	52556331	52556528	NC_006088.4.1-90000000.190925	0.1758	0.12611	3.06405	11.7477	0	0.0339651
NC_006088.4	52614277	52614437	NC_006088.4.1-90000000.191200	0.41188	0.31941	2.58914	15.1957	0	0.00604209
NC_006088.4	52838202	52838369	NC_006088.4.1-90000000.192137	0.2852	0.2193	2.59874	11.6481	0	0.035929
NC_006088.4	52855589	52855718	NC_006088.4.1-90000000.192218	0.50449	0.38636	2.71733	15.7759	0	0.00529183
NC_006088.4	52940017	52940313	NC_006088.4.1-90000000.192661	0.32989	0.27504	2.09459	12.4629	0	0.025365
NC_006088.4	53252565	53252744	NC_006088.4.1-90000000.194383	0.30205	0.23123	2.65802	13.7459	0	0.0152815
NC_006088.4	53887911	53888043	NC_006088.4.1-90000000.197369	0.36614	0.28323	2.59962	11.2685	0	0.0413202
NC_006088.4	54013951	54014199	NC_006088.4.1-90000000.197973	0.37857	0.29656	2.50338	20.2241	0	0
NC_006088.4	54036838	54037070	NC_006088.4.1-90000000.198179	0.36241	0.29232	2.28503	14.5708	0	0.00998135
NC_006088.4	54135083	54135212	NC_006088.4.1-90000000.198775	0.21754	0.137	4.21798	16.208	0	0.00529183
NC_006088.4	54151351	54151819	NC_006088.4.1-90000000.198883	0.2425	0.2082	1.88935	11.0689	0	0.0466281
NC_006088.4	54167336	54167518	NC_006088.4.1-90000000.198991	0.33467	0.23341	3.44176	25.5848	0	0
NC_006088.4	54551486	54551600	NC_006088.4.1-90000000.200613	0.43295	0.31988	2.94953	15.0318	0	0.00667579
NC_006088.4	54996016	54996128	NC_006088.4.1-90000000.202192	0.25207	0.17036	3.65247	12.8888	0	0.0198822
NC_006088.4	55032191	55032451	NC_006088.4.1-90000000.202312	0.36023	0.27132	2.78529	25.6639	0	0
NC_006088.4	55374044	55374298	NC_006088.4.1-90000000.203656	0.20306	0.14395	3.22299	20.083	0	0
NC_006088.4	55388756	55388876	NC_006088.4.1-90000000.203685	0.49311	0.33298	3.68528	26.7289	0	0
NC_006088.4	55459958	55460084	NC_006088.4.1-90000000.203840	0.56585	0.45702	2.2863	11.9139	0	0.031249
NC_006088.4	55742378	55742620	NC_006088.4.1-90000000.204771	0.42029	0.34109	2.25885	16.3744	0	0.00529183
NC_006088.4	56064284	56064397	NC_006088.4.1-90000000.206458	0.41973	0.31259	2.84081	13.4994	0	0.015854
NC_006088.4	56229564	56229766	NC_006088.4.1-90000000.207552	0.43635	0.34799	2.33559	15.8524	0	0.00529183
NC_006088.4	56315546	56315769	NC_006088.4.1-90000000.207821	0.35319	0.28123	2.40026	16.0207	0	0.00529183
NC_006088.4	57153875	57153982	NC_006088.4.1-90000000.211286	0.45719	0.24837	5.76596	42.0758	0	0
NC_006088.4	57220530	57220685	NC_006088.4.1-90000000.211658	0.34233	0.26797	2.63886	12.8229	0	0.0217041
NC_006088.4	57616412	57616566	NC_006088.4.1-90000000.213468	0.26919	0.20312	2.77667	11.9748	0	0.0302964
NC_006088.4	57811290	57811417	NC_006088.4.1-90000000.214326	0.4285	0.33839	2.45524	11.2661	0	0.0413202
NC_006088.4	57998867	57998980	NC_006088.4.1-90000000.214858	0.4161	0.30618	3.37591	16.9761	0	0.00374665
NC_006088.4	58713483	58713857	NC_006088.4.1-90000000.216579	0.3197	0.27255	1.92052	12.3893	0	0.0263269
NC_006088.4	58897183	58897321	NC_006088.4.1-90000000.217102	0.4755	0.3581	2.76678	17.6503	0	0.00137049
NC_006088.4	60005650	60005759	NC_006088.4.1-90000000.220997	0.50091	0.37899	2.75108	14.1859	0	0.0120389
NC_006088.4	60577188	60577316	NC_006088.4.1-90000000.223686	0.27188	0.19267	3.2181	14.2273	0	0.0120389
NC_006088.4	61195025	61195208	NC_006088.4.1-90000000.226716	0.19526	0.13499	3.45341	15.1118	0	0.00667579
NC_006088.4	61394772	61394956	NC_006088.4.1-90000000.227477	0.52129	0.41213	2.36937	15.8405	0	0.00529183
NC_006088.4	61613537	61613769	NC_006088.4.1-90000000.228495	0.29947	0.233	2.42841	13.654	0	0.015854
NC_006088.4	62274775	62274942	NC_006088.4.1-90000000.231734	0.46042	0.37134	2.61028	13.2146	0	0.0169766
NC_006088.4	62791403	62791583	NC_006088.4.1-90000000.233528	0.3278	0.25515	2.47621	12.4502	0	0.025365
NC_006088.4	62906079	62906265	NC_006088.4.1-90000000.233981	0.17344	0.11902	3.48355	14.1907	0	0.0120389
NC_006088.4	63354892	63355178	NC_006088.4.1-90000000.235739	0.38854	0.32892	2.00656	12.8192	0	0.0217041
NC_006088.4	63366820	63367030	NC_006088.4.1-90000000.235799	0.34196	0.2625	2.94063	20.0759	0	0
NC_006088.4	63558018	63558207	NC_006088.4.1-90000000.236713	0.33375	0.26483	2.43159	11.7918	0	0.0334751
NC_006088.4	63658859	63659294	NC_006088.4.1-90000000.237124	0.36656	0.32225	1.73541	11.2381	0	0.0421582
NC_006088.4	63660983	63661094	NC_006088.4.1-90000000.237130	0.42208	0.30578	3.06204	15.6793	0	0.00529183
NC_006088.4	63780128	63780407	NC_006088.4.1-90000000.237507	0.24016	0.19314	2.32421	11.9733	0	0.0302964
NC_006088.4	63817921	63818066	NC_006088.4.1-90000000.237634	0.53471	0.39711	2.87604	22.1043	0	0
NC_006088.4	64261296	64261415	NC_006088.4.1-90000000.239166	0.42459	0.30975	2.90718	14.9417	0	0.00667579
NC_006088.4	64307581	64307690	NC_006088.4.1-90000000.239273	0.46598	0.32992	3.28408	19.0049	0	0
NC_006088.4	66202338	66202986	NC_006088.4.1-90000000.247367	0.09296	0.07156	2.62017	15.0698	0	0.00667579
NC_006088.4	66255249	66255457	NC_006088.4.1-90000000.247672	0.20121	0.15092	2.80171	11.9256	0	0.031249
NC_006088.4	66869307	66869489	NC_006088.4.1-90000000.249828	0.38944	0.29599	3.22879	22.3415	0	0
NC_006088.4	68787904	68788127	NC_006088.4.1-90000000.256648	0.53433	0.41504	3.42982	30.7521	0	0
NC_006088.4	68823618	68823768	NC_006088.4.1-90000000.256737	0.40673	0.28529	3.39226	24.2661	0	0
NC_006088.4	68914794	68915021	NC_006088.4.1-90000000.257248	0.36191	0.27891	2.59926	19.273	0	0
NC_006088.4	68915028	68915262	NC_006088.4.1-90000000.257249	0.45106	0.36748	2.15692	14.724	0	0.00998135
NC_006088.4	69430817	69430937	NC_006088.4.1-90000000.258898	0.53414	0.42693	2.35545	11.5256	0	0.037518
NC_006088.4	69897236	69897510	NC_006088.4.1-90000000.260012	0.31136	0.24724	3.07633	22.5081	0	0
NC_006088.4	69916639	69916785	NC_006088.4.1-90000000.260090	0.45551	0.3672	2.40882	11.9584	0	0.031249
NC_006088.4	69944598	69944729	NC_006088.4.1-90000000.260166	0.25167	0.18515	3.26989	11.2492	0	0.0417833
NC_006088.4	69946726	69946967	NC_006088.4.1-90000000.260172	0.3682	0.27498	2.85851	25.5775	0	0
NC_006088.4	69953577	69953946	NC_006088.4.1-90000000.260211	0.34877	0.2691	2.61074	30.7598	0	0
NC_006088.4	69961023	69961199	NC_006088.4.1-90000000.260247	0.32881	0.26011	2.61616	12.9777	0	0.0193234
NC_006088.4	69993073	69993352	NC_006088.4.1-90000000.260377	0.18081	0.13911	2.65224	12.7566	0	0.0222074
NC_006088.4	69994077	69994344	NC_006088.4.1-90000000.260388	0.23764	0.17856	2.82025	17.8724	0	0.00137049
NC_006088.4	70026003	70026298	NC_006088.4.1-90000000.260556	0.19088	0.14442	2.75328	15.7816	0	0.00529183
NC_006088.4	70038444	70038746	NC_006088.4.1-90000000.260609	0.25742	0.15536	4.68043	52.6436	0	0
NC_006088.4	70040755	70041129	NC_006088.4.1-90000000.260617	0.21134	0.14451	3.5684	34.3634	0	0
NC_006088.4	70047303	70047493	NC_006088.4.1-90000000.260646	0.40363	0.31313	2.5654	17.2061	0	0.00257932
NC_006088.4	70048572	70048744	NC_006088.4.1-90000000.260656	0.27881	0.2124	2.69778	12.484	0	0.025365
NC_006088.4	70052572	70052703	NC_006088.4.1-90000000.260663	0.47429	0.37639	2.40292	11.8428	0	0.031507
NC_006088.4	70052705	70052828	NC_006088.4.1-90000000.260664	0.45327	0.34305	2.75299	15.3349	0	0.00604209
NC_006088.4	70067294	70067527	NC_006088.4.1-90000000.260741	0.4274	0.3563	2.11723	13.662	0	0.015854
NC_006088.4	70084009	70084228	NC_006088.4.1-90000000.260831	0.39842	0.34068	2.31604	11.2381	0	0.0421582
NC_006088.4	70084230	70084335	NC_006088.4.1-90000000.260832	0.41134	0.31048	2.94513	12.0762	0	0.029537
NC_006088.4	70085891	70086002	NC_006088.4.1-90000000.260848	0.39463	0.28362	3.97674	18.2826	0	0
NC_006088.4	70090514	70090667	NC_006088.4.1-90000000.260881	0.38431	0.26905	3.39643	23.8899	0	0
NC_006088.4	70098505	70098637	NC_006088.4.1-90000000.260933	0.25018	0.17776	3.71117	14.2299	0	0.0120389
NC_006088.4	70122549	70122790	NC_006088.4.1-90000000.261078	0.43912	0.37097	1.9906	11.868	0	0.031507
NC_006088.4	70125639	70125773	NC_006088.4.1-90000000.261099	0.15874	0.10064	4.14435	12.3414	0	0.0268336
NC_006088.4	70125780	70125893	NC_006088.4.1-90000000.261100	0.36479	0.25197	3.49796	16.289	0	0.00529183
NC_006088.4	70126712	70126873	NC_006088.4.1-90000000.261109	0.3331	0.25934	2.54501	12.0283	0	0.0298894
NC_006088.4	70144158	70144356	NC_006088.4.1-90000000.261206	0.35574	0.27821	2.5341	15.6648	0	0.00529183
NC_006088.4	70146987	70147184	NC_006088.4.1-90000000.261234	0.19146	0.12308	4.02223	21.1405	0	0
NC_006088.4	70147602	70147768	NC_006088.4.1-90000000.261237	0.39364	0.2888	3.05421	20.8182	0	0
NC_006088.4	70170465	70170596	NC_006088.4.1-90000000.261327	0.40074	0.29496	2.93764	15.11	0	0.00667579
NC_006088.4	70172667	70172784	NC_006088.4.1-90000000.261333	0.35562	0.26738	3.24403	13.1732	0	0.0169766
NC_006088.4	70173215	70173550	NC_006088.4.1-90000000.261334	0.32618	0.27222	2.19207	14.1579	0	0.0120389
NC_006088.4	70540890	70541162	NC_006088.4.1-90000000.262252	0.41164	0.33159	2.31388	20.4892	0	0
NC_006088.4	70543129	70543307	NC_006088.4.1-90000000.262261	0.25574	0.18171	3.23526	17.0657	0	0.00257932
NC_006088.4	70575692	70575914	NC_006088.4.1-90000000.262398	0.45227	0.38211	1.99065	11.3998	0	0.0391986
NC_006088.4	70613353	70613820	NC_006088.4.1-90000000.262582	0.29173	0.22747	2.54051	30.5942	0	0
NC_006088.4	70634047	70634191	NC_006088.4.1-90000000.262673	0.36437	0.26295	3.2358	19.15	0	0
NC_006088.4	70698615	70698814	NC_006088.4.1-90000000.262876	0.3142	0.21821	3.41144	25.8255	0	0
NC_006088.4	70752767	70753120	NC_006088.4.1-90000000.263031	0.27756	0.22771	2.19043	14.6068	0	0.00998135
NC_006088.4	71053294	71053469	NC_006088.4.1-90000000.264246	0.42561	0.33535	2.31609	12.7046	0	0.0228238
NC_006088.4	71053473	71053590	NC_006088.4.1-90000000.264247	0.41382	0.29982	2.90971	13.4086	0	0.015854
NC_006088.4	71069321	71069576	NC_006088.4.1-90000000.264301	0.45495	0.33096	2.93257	33.0917	0	0
NC_006088.4	71135998	71136124	NC_006088.4.1-90000000.264453	0.39444	0.29498	2.82596	15.1007	0	0.00667579
NC_006088.4	71306753	71306894	NC_006088.4.1-90000000.265187	0.41105	0.30913	2.63236	12.4652	0	0.025365
NC_006088.4	71306899	71307011	NC_006088.4.1-90000000.265188	0.38661	0.23648	4.12669	22.5012	0	0
NC_006088.4	71697634	71698023	NC_006088.4.1-90000000.266720	0.24341	0.17685	2.95842	29.5679	0	0
NC_006088.4	71876670	71876783	NC_006088.4.1-90000000.267376	0.39295	0.30227	2.69897	11.2554	0	0.0417833
NC_006088.4	71880180	71880321	NC_006088.4.1-90000000.267392	0.37868	0.29572	2.54217	11.5542	0	0.037518
NC_006088.4	72042520	72042876	NC_006088.4.1-90000000.267961	0.36475	0.31154	1.95782	13.6181	0	0.015854
NC_006088.4	72117999	72118129	NC_006088.4.1-90000000.268223	0.43067	0.32201	3.0446	16.7772	0	0.00496012
NC_006088.4	72568481	72568612	NC_006088.4.1-90000000.270070	0.38356	0.29276	2.69217	12.7879	0	0.0222074
NC_006088.4	72819194	72819351	NC_006088.4.1-90000000.270554	0.322	0.24178	2.75887	13.6706	0	0.015854
NC_006088.4	74568346	74568512	NC_006088.4.1-90000000.274284	0.36276	0.28473	2.49647	13.1144	0	0.0183368
NC_006088.4	80216007	80216142	NC_006088.4.1-90000000.289224	0.20097	0.13365	3.74417	13.1773	0	0.0169766
NC_006088.4	80404903	80405075	NC_006088.4.1-90000000.290113	0.21098	0.15554	2.92797	12.0269	0	0.0298894
NC_006088.4	81016419	81016526	NC_006088.4.1-90000000.293508	0.38151	0.278	3.04367	13.3656	0	0.015854
NC_006088.4	81041254	81041377	NC_006088.4.1-90000000.293621	0.41269	0.31225	2.88362	14.3867	0	0.0120389
NC_006088.4	81176227	81176380	NC_006088.4.1-90000000.294369	0.39553	0.30565	2.58418	14.3654	0	0.0120389
NC_006088.4	81202194	81202347	NC_006088.4.1-90000000.294524	0.3623	0.26635	3.06575	17.3458	0	0.00257932
NC_006088.4	81303706	81303883	NC_006088.4.1-90000000.295033	0.42191	0.33472	2.43691	14.6402	0	0.00998135
NC_006088.4	81362681	81362861	NC_006088.4.1-90000000.295409	0.15977	0.11064	3.4129	12.5714	0	0.0250665
NC_006088.4	81625178	81625288	NC_006088.4.1-90000000.296866	0.56537	0.43544	2.69078	14.6997	0	0.00998135
NC_006088.4	81807392	81807562	NC_006088.4.1-90000000.297932	0.41694	0.32846	2.52536	14.4183	0	0.0120389
NC_006088.4	81860481	81860790	NC_006088.4.1-90000000.298246	0.29417	0.23324	2.43015	18.5801	0	0
NC_006088.4	81922650	81923007	NC_006088.4.1-90000000.298589	0.21444	0.17107	2.38667	14.7388	0	0.00998135
NC_006088.4	81965251	81965405	NC_006088.4.1-90000000.298832	0.31159	0.22777	2.98529	15.6311	0	0.00529183
NC_006088.4	82043441	82043644	NC_006088.4.1-90000000.299393	0.24922	0.16381	3.84991	26.3035	0	0
NC_006088.4	82188905	82189043	NC_006088.4.1-90000000.300345	0.35062	0.22613	4.00832	26.7069	0	0
NC_006088.4	82643885	82644116	NC_006088.4.1-90000000.303035	0.36235	0.29743	2.24906	12.375	0	0.0263269
NC_006088.4	82666575	82666717	NC_006088.4.1-90000000.303160	0.47554	0.38124	2.38104	12.4231	0	0.0263269
NC_006088.4	82693899	82694149	NC_006088.4.1-90000000.303300	0.23137	0.18291	2.47526	12.0405	0	0.0298894
NC_006088.4	82711078	82711279	NC_006088.4.1-90000000.303408	0.42466	0.34791	2.24759	13.2908	0	0.016492
NC_006088.4	82753401	82753548	NC_006088.4.1-90000000.303682	0.40568	0.32031	2.45217	12.1528	0	0.0280475
NC_006088.4	82880684	82880804	NC_006088.4.1-90000000.304574	0.48651	0.35009	3.38363	21.2417	0	0
NC_006088.4	82885787	82885972	NC_006088.4.1-90000000.304619	0.23457	0.17501	2.83684	12.9449	0	0.0193234
NC_006088.4	82897315	82897433	NC_006088.4.1-90000000.304695	0.40658	0.30242	2.88007	14.3994	0	0.0120389
NC_006088.4	82915055	82915283	NC_006088.4.1-90000000.304810	0.32153	0.24445	2.71447	18.6196	0	0
NC_006088.4	83671363	83671581	NC_006088.4.1-90000000.308220	0.40673	0.32869	2.3119	16.044	0	0.00529183
NC_006088.4	83671732	83671833	NC_006088.4.1-90000000.308224	0.34841	0.24274	3.38183	14.6282	0	0.00998135
NC_006088.4	83674629	83674785	NC_006088.4.1-90000000.308235	0.33191	0.22717	3.55393	24.4646	0	0
NC_006088.4	83829800	83829961	NC_006088.4.1-90000000.308903	0.32269	0.2473	2.96151	15.08	0	0.00667579
NC_006088.4	83848231	83848362	NC_006088.4.1-90000000.308991	0.38225	0.29391	2.84815	13.4907	0	0.015854
NC_006088.4	84012251	84012371	NC_006088.4.1-90000000.309673	0.48409	0.3836	2.46504	11.1822	0	0.0434679
NC_006088.4	84339463	84339675	NC_006088.4.1-90000000.310856	0.35662	0.25042	3.2989	29.7488	0	0
NC_006088.4	84393278	84393548	NC_006088.4.1-90000000.311078	0.23774	0.18047	2.72835	16.886	0	0.00374665
NC_006088.4	84509939	84510096	NC_006088.4.1-90000000.311649	0.50379	0.37198	2.92106	22.5519	0	0
NC_006088.4	84529490	84529644	NC_006088.4.1-90000000.311756	0.45869	0.35505	2.57756	16.4784	0	0.00529183
NC_006088.4	84703095	84703213	NC_006088.4.1-90000000.312451	0.27233	0.18634	3.63537	14.6628	0	0.00998135
NC_006088.4	84733912	84734037	NC_006088.4.1-90000000.312572	0.3362	0.24459	3.14822	13.5169	0	0.015854
NC_006088.4	84771865	84772005	NC_006088.4.1-90000000.312707	0.23278	0.16648	3.16695	11.7516	0	0.0339651
NC_006088.4	85119802	85119904	NC_006088.4.1-90000000.313738	0.42725	0.31001	3.09341	15.0581	0	0.00667579
NC_006088.4	85217546	85217646	NC_006088.4.1-90000000.314035	0.45194	0.3327	3.01712	13.9787	0	0.013461
NC_006088.4	85217665	85217809	NC_006088.4.1-90000000.314036	0.37371	0.23453	4.31857	31.7683	0	0
NC_006088.4	85225813	85225948	NC_006088.4.1-90000000.314069	0.33536	0.20734	4.42162	28.8553	0	0
NC_006088.4	85790207	85790334	NC_006088.4.1-90000000.316025	0.45337	0.34421	2.64256	13.3592	0	0.015854
NC_006088.4	85993136	85993295	NC_006088.4.1-90000000.316648	0.29878	0.21688	3.03969	15.5729	0	0.00529183
NC_006088.4	86135809	86135948	NC_006088.4.1-90000000.317181	0.54815	0.44342	2.21912	11.2528	0	0.0417833
NC_006088.4	86454742	86455013	NC_006088.4.1-90000000.318645	0.2981	0.23395	2.545	17.8757	0	0.00137049
NC_006088.4	87025610	87025727	NC_006088.4.1-90000000.320578	0.44409	0.32806	2.74919	13.2444	0	0.0169766
NC_006088.4	87214471	87214607	NC_006088.4.1-90000000.321361	0.38325	0.30088	2.50185	11.2035	0	0.0430531
NC_006088.4	87848970	87849114	NC_006088.4.1-90000000.323080	0.50924	0.39355	2.39527	12.9835	0	0.0193234
NC_006088.4	87957743	87958008	NC_006088.4.1-90000000.323379	0.38703	0.28553	2.93267	31.4486	0	0
NC_006088.4	88276766	88277190	NC_006088.4.1-90000000.324099	0.2267	0.18485	2.24613	16.1616	0	0.00529183
NC_006088.4	88922438	88922631	NC_006088.4.1-90000000.326064	0.37663	0.2853	2.8139	18.7575	0	0
NC_006088.4	88927441	88927551	NC_006088.4.1-90000000.326073	0.48054	0.36147	2.69544	12.9854	0	0.0193234
NC_006088.4	89908446	89908590	NC_006088.4.1-90000000.328891	0.4316	0.32677	2.62595	14.4115	0	0.0120389
NC_006088.4	90950738	90950959	NC_006088.4.90000001-180000000.1986	0.4809	0.40216	2.09445	13.3681	0	0.015854
NC_006088.4	90959273	90959375	NC_006088.4.90000001-180000000.2012	0.48595	0.37081	2.70993	12.0097	0	0.0298894
NC_006088.4	91173159	91173502	NC_006088.4.90000001-180000000.2690	0.4563	0.38743	2.18126	19.39	0	0
NC_006088.4	93021624	93021753	NC_006088.4.90000001-180000000.10578	0.41797	0.31999	2.8195	14.6342	0	0.00998135
NC_006088.4	93184405	93184567	NC_006088.4.90000001-180000000.11190	0.36813	0.28736	2.51086	13.2402	0	0.0169766
NC_006088.4	94016895	94017039	NC_006088.4.90000001-180000000.13428	0.52771	0.38887	2.95763	22.3434	0	0
NC_006088.4	94026945	94027069	NC_006088.4.90000001-180000000.13453	0.5445	0.43206	2.38532	12.278	0	0.0268987
NC_006088.4	94091956	94092072	NC_006088.4.90000001-180000000.13624	0.57562	0.41755	3.11262	21.8045	0	0
NC_006088.4	94228755	94229008	NC_006088.4.90000001-180000000.13904	0.41155	0.33231	2.29956	18.2462	0	0
NC_006088.4	94597930	94598064	NC_006088.4.90000001-180000000.14711	0.57936	0.37302	4.23486	33.7157	0	0
NC_006088.4	95074855	95074994	NC_006088.4.90000001-180000000.15849	0.37516	0.28472	2.77264	13.663	0	0.015854
NC_006088.4	95762759	95763077	NC_006088.4.90000001-180000000.17325	0.32691	0.2752	2.01889	12.4035	0	0.0263269
NC_006088.4	95882789	95882953	NC_006088.4.90000001-180000000.17648	0.34029	0.26865	2.43173	11.1513	0	0.0438115
NC_006088.4	97077286	97077446	NC_006088.4.90000001-180000000.22021	0.4581	0.369	2.31678	12.5237	0	0.025365
NC_006088.4	97222908	97223081	NC_006088.4.90000001-180000000.22607	0.40182	0.28941	3.14384	24.2341	0	0
NC_006088.4	97384727	97384988	NC_006088.4.90000001-180000000.23072	0.48413	0.35803	2.90563	37.0702	0	0
NC_006088.4	97406448	97406585	NC_006088.4.90000001-180000000.23181	0.34455	0.25509	2.91319	14.6707	0	0.00998135
NC_006088.4	97579086	97579256	NC_006088.4.90000001-180000000.23757	0.51494	0.43073	2.13515	11.259	0	0.0413202
NC_006088.4	97884908	97885107	NC_006088.4.90000001-180000000.24750	0.42802	0.29097	3.63433	38.6335	0	0
NC_006088.4	98720654	98720856	NC_006088.4.90000001-180000000.28004	0.43756	0.36275	2.1079	11.9478	0	0.031249
NC_006088.4	98778054	98778195	NC_006088.4.90000001-180000000.28208	0.48672	0.37006	2.68439	16.5229	0	0.00529183
NC_006088.4	98909553	98909722	NC_006088.4.90000001-180000000.28663	0.51633	0.42291	2.20147	12.0001	0	0.0302964
NC_006088.4	99022752	99022875	NC_006088.4.90000001-180000000.29027	0.44481	0.33775	2.64328	12.8633	0	0.0204559
NC_006088.4	99071819	99071930	NC_006088.4.90000001-180000000.29272	0.44543	0.2975	3.91269	24.0535	0	0
NC_006088.4	99098022	99098142	NC_006088.4.90000001-180000000.29360	0.53331	0.40543	2.89544	17.6914	0	0.00137049
NC_006088.4	99179585	99179697	NC_006088.4.90000001-180000000.29579	0.54187	0.43135	2.40498	11.2794	0	0.0413202
NC_006088.4	101285985	101286105	NC_006088.4.90000001-180000000.32991	0.4569	0.30732	3.86832	24.1607	0	0
NC_006088.4	102325250	102325488	NC_006088.4.90000001-180000000.34370	0.22015	0.17174	2.83546	13.2829	0	0.016492
NC_006088.4	102423422	102423542	NC_006088.4.90000001-180000000.34645	0.45683	0.3215	3.13481	17.8249	0	0.00137049
NC_006088.4	102441829	102442012	NC_006088.4.90000001-180000000.34704	0.41897	0.33973	2.34919	11.6037	0	0.037518
NC_006088.4	102823252	102823365	NC_006088.4.90000001-180000000.35661	0.52219	0.42504	2.52441	11.1524	0	0.0438115
NC_006088.4	103710077	103710270	NC_006088.4.90000001-180000000.38599	0.39743	0.24052	4.58413	49.4796	0	0
NC_006088.4	104047637	104047768	NC_006088.4.90000001-180000000.39705	0.2543	0.17845	3.3222	13.6099	0	0.015854
NC_006088.4	105945981	105946096	NC_006088.4.90000001-180000000.47206	0.52659	0.3549	4.26064	27.5742	0	0
NC_006088.4	106318818	106319005	NC_006088.4.90000001-180000000.49007	0.37607	0.29378	2.55084	14.9068	0	0.00667579
NC_006088.4	106341632	106341739	NC_006088.4.90000001-180000000.49095	0.4761	0.3232	4.58035	27.0375	0	0
NC_006088.4	106388126	106388313	NC_006088.4.90000001-180000000.49275	0.42158	0.35423	3.5463	15.5006	0	0.00604209
NC_006088.4	106879985	106880399	NC_006088.4.90000001-180000000.51181	0.24309	0.194	2.39518	19.2577	0	0
NC_006088.4	106928549	106928680	NC_006088.4.90000001-180000000.51330	0.47447	0.25217	7.68346	67.3187	0	0
NC_006088.4	107093909	107094035	NC_006088.4.90000001-180000000.51763	0.53624	0.41809	2.67177	13.8261	0	0.0138965
NC_006088.4	107139333	107139480	NC_006088.4.90000001-180000000.51882	0.38574	0.32223	3.17528	12.4245	0	0.0259477
NC_006088.4	108034661	108034783	NC_006088.4.90000001-180000000.55458	0.49638	0.38397	2.5636	13.8583	0	0.0138965
NC_006088.4	108122769	108122874	NC_006088.4.90000001-180000000.55754	0.5716	0.44258	2.6018	13.4458	0	0.015854
NC_006088.4	108547613	108547996	NC_006088.4.90000001-180000000.57293	0.24755	0.20479	2.12427	13.5283	0	0.015854
NC_006088.4	111064763	111064893	NC_006088.4.90000001-180000000.67294	0.50978	0.41269	2.28397	11.3482	0	0.0401207
NC_006088.4	111147793	111148234	NC_006088.4.90000001-180000000.67712	0.28669	0.24602	1.89255	12.2702	0	0.0268987
NC_006088.4	112219913	112220055	NC_006088.4.90000001-180000000.71463	0.34897	0.26881	2.62531	11.9566	0	0.031249
NC_006088.4	112478155	112478257	NC_006088.4.90000001-180000000.72950	0.49155	0.36303	3.11654	15.872	0	0.00529183
NC_006088.4	112497904	112498078	NC_006088.4.90000001-180000000.73111	0.36121	0.28281	2.52763	13.8876	0	0.0138965
NC_006088.4	113940580	113940694	NC_006088.4.90000001-180000000.78154	0.61552	0.48716	2.40762	12.9657	0	0.0193234
NC_006088.4	114068011	114068280	NC_006088.4.90000001-180000000.78485	0.27952	0.22895	2.18981	11.5264	0	0.037518
NC_006088.4	114984351	114984604	NC_006088.4.90000001-180000000.80849	0.51318	0.42696	2.07621	16.0269	0	0.00529183
NC_006088.4	115340172	115340276	NC_006088.4.90000001-180000000.81640	0.3661	0.24617	3.97955	18.3234	0	0
NC_006088.4	115737791	115738022	NC_006088.4.90000001-180000000.82627	0.26444	0.18711	3.27766	23.4558	0	0
NC_006088.4	116733426	116733595	NC_006088.4.90000001-180000000.84722	0.28276	0.19155	3.70673	23.3392	0	0
NC_006088.4	117171645	117171782	NC_006088.4.90000001-180000000.85436	0.56874	0.40533	2.99259	22.9483	0	0
NC_006088.4	117789938	117790095	NC_006088.4.90000001-180000000.86663	0.44005	0.32025	3.16168	23.164	0	0
NC_006088.4	117796324	117796446	NC_006088.4.90000001-180000000.86691	0.38104	0.28098	2.98653	14.7391	0	0.00998135
NC_006088.4	117796456	117796615	NC_006088.4.90000001-180000000.86692	0.32413	0.24117	2.99514	15.2822	0	0.00604209
NC_006088.4	117826792	117827023	NC_006088.4.90000001-180000000.86810	0.3114	0.25306	2.2378	11.6526	0	0.035929
NC_006088.4	118703641	118703758	NC_006088.4.90000001-180000000.90271	0.58776	0.43443	2.77594	16.0013	0	0.00529183
NC_006088.4	119102455	119102612	NC_006088.4.90000001-180000000.91669	0.37024	0.28058	2.73743	15.2189	0	0.00604209
NC_006088.4	119605634	119605774	NC_006088.4.90000001-180000000.93467	0.37772	0.29572	2.51583	11.5505	0	0.037518
NC_006088.4	120355561	120355739	NC_006088.4.90000001-180000000.95867	0.42799	0.34544	2.45303	14.2708	0	0.0120389
NC_006088.4	121114302	121114434	NC_006088.4.90000001-180000000.99085	0.48848	0.39415	2.31519	11.6891	0	0.0348432
NC_006088.4	122280881	122281157	NC_006088.4.90000001-180000000.102660	0.32352	0.26785	2.11754	12.4148	0	0.0263269
NC_006088.4	122574067	122574223	NC_006088.4.90000001-180000000.103458	0.39133	0.31326	2.4561	11.977	0	0.0302964
NC_006088.4	123843594	123843735	NC_006088.4.90000001-180000000.107506	0.34098	0.2604	2.66872	12.4799	0	0.025365
NC_006088.4	125453077	125453288	NC_006088.4.90000001-180000000.113894	0.34714	0.28281	2.23761	12.1248	0	0.0291028
NC_006088.4	125464008	125464147	NC_006088.4.90000001-180000000.113951	0.31994	0.23699	2.88296	13.2597	0	0.016492
NC_006088.4	125517724	125517952	NC_006088.4.90000001-180000000.114228	0.47647	0.35406	2.91146	31.5632	0	0
NC_006088.4	125544256	125544440	NC_006088.4.90000001-180000000.114338	0.31961	0.23416	3.05325	18.8357	0	0
NC_006088.4	125608650	125608768	NC_006088.4.90000001-180000000.114585	0.57696	0.44394	2.61767	14.2822	0	0.0120389
NC_006088.4	126247855	126248187	NC_006088.4.90000001-180000000.115911	0.39151	0.30999	2.35142	22.2169	0	0
NC_006088.4	126429405	126429599	NC_006088.4.90000001-180000000.116264	0.46292	0.37038	2.35049	15.9984	0	0.00529183
NC_006088.4	126537457	126537558	NC_006088.4.90000001-180000000.116548	0.43283	0.29611	3.52511	19.675	0	0
NC_006088.4	126545215	126545380	NC_006088.4.90000001-180000000.116575	0.3848	0.2826	2.9773	20.5278	0	0
NC_006088.4	126697642	126697750	NC_006088.4.90000001-180000000.116878	0.41263	0.28976	3.32788	17.7162	0	0.00137049
NC_006088.4	127055360	127055559	NC_006088.4.90000001-180000000.117593	0.39416	0.32364	2.19544	11.603	0	0.037518
NC_006088.4	128125592	128125708	NC_006088.4.90000001-180000000.118831	0.6021	0.46328	2.75654	15.3165	0	0.00604209
NC_006088.4	129335915	129336080	NC_006088.4.90000001-180000000.122448	0.39405	0.29327	2.74023	17.1425	0	0.00257932
NC_006088.4	129408579	129409111	NC_006088.4.90000001-180000000.122734	0.12171	0.09775	2.32935	12.0698	0	0.029537
NC_006088.4	129409160	129409299	NC_006088.4.90000001-180000000.122736	0.41635	0.32786	2.47009	11.8538	0	0.031507
NC_006088.4	129529643	129530028	NC_006088.4.90000001-180000000.123191	0.32476	0.28062	1.92629	12.0983	0	0.0291028
NC_006088.4	129607339	129608377	NC_006088.4.90000001-180000000.123522	0.16223	0.14321	1.71615	11.6423	0	0.0365004
NC_006088.4	129694143	129694302	NC_006088.4.90000001-180000000.123825	0.40136	0.32025	2.38203	11.9489	0	0.031249
NC_006088.4	129729150	129729254	NC_006088.4.90000001-180000000.123989	0.46403	0.35198	2.73504	12.4209	0	0.0263269
NC_006088.4	129832568	129832728	NC_006088.4.90000001-180000000.124533	0.28921	0.20669	3.1645	17.0154	0	0.00257932
NC_006088.4	129836344	129836447	NC_006088.4.90000001-180000000.124548	0.61531	0.47541	2.77874	14.4758	0	0.0120389
NC_006088.4	129836453	129836610	NC_006088.4.90000001-180000000.124549	0.20705	0.14206	3.60092	15.0088	0	0.00667579
NC_006088.4	129880095	129880313	NC_006088.4.90000001-180000000.124755	0.3195	0.24336	2.6956	17.862	0	0.00137049
NC_006088.4	129936561	129936661	NC_006088.4.90000001-180000000.125079	0.43986	0.30957	3.331	17.1793	0	0.00257932
NC_006088.4	129941806	129942109	NC_006088.4.90000001-180000000.125107	0.40163	0.32413	2.29614	20.1893	0	0
NC_006088.4	129948370	129948583	NC_006088.4.90000001-180000000.125155	0.44924	0.36699	2.16373	13.5199	0	0.015854
NC_006088.4	130775196	130775531	NC_006088.4.90000001-180000000.127828	0.41398	0.35371	1.9181	13.648	0	0.015854
NC_006088.4	131680750	131680947	NC_006088.4.90000001-180000000.130575	0.39141	0.3214	2.18067	11.7555	0	0.0334751
NC_006088.4	131713081	131713198	NC_006088.4.90000001-180000000.130691	0.45315	0.34881	2.83612	13.9884	0	0.013461
NC_006088.4	132744327	132744443	NC_006088.4.90000001-180000000.134511	0.51287	0.3984	2.56607	13.2661	0	0.016492
NC_006088.4	132759071	132759228	NC_006088.4.90000001-180000000.134612	0.48408	0.39493	2.23182	11.6085	0	0.037518
NC_006088.4	132800910	132801204	NC_006088.4.90000001-180000000.134877	0.40158	0.34372	1.90261	11.5215	0	0.037518
NC_006088.4	132987592	132988132	NC_006088.4.90000001-180000000.136011	0.21708	0.17964	2.1252	16.9921	0	0.00374665
NC_006088.4	133006607	133006717	NC_006088.4.90000001-180000000.136102	0.41139	0.27175	3.83159	22.301	0	0
NC_006088.4	133260334	133260446	NC_006088.4.90000001-180000000.137295	0.41596	0.29928	3.09587	16.2452	0	0.00529183
NC_006088.4	134189625	134189863	NC_006088.4.90000001-180000000.141696	0.42002	0.32253	2.63089	23.5645	0	0
NC_006088.4	134240536	134240817	NC_006088.4.90000001-180000000.141927	0.32557	0.26584	2.07947	11.1734	0	0.0438115
NC_006088.4	134358544	134358668	NC_006088.4.90000001-180000000.142461	0.32333	0.24586	2.99656	11.296	0	0.0409955
NC_006088.4	134364188	134364293	NC_006088.4.90000001-180000000.142488	0.38638	0.28131	3.05442	13.4246	0	0.015854
NC_006088.4	134379390	134379514	NC_006088.4.90000001-180000000.142547	0.52336	0.40199	2.75105	14.9997	0	0.00667579
NC_006088.4	134395413	134395663	NC_006088.4.90000001-180000000.142617	0.43877	0.32823	2.87984	31.1644	0	0
NC_006088.4	134397594	134397974	NC_006088.4.90000001-180000000.142623	0.33939	0.27997	2.15701	17.7206	0	0.00137049
NC_006088.4	134418291	134418545	NC_006088.4.90000001-180000000.142709	0.34038	0.28253	2.10959	12.1133	0	0.0291028
NC_006088.4	134446618	134446943	NC_006088.4.90000001-180000000.142842	0.35992	0.28655	2.38004	21.7087	0	0
NC_006088.4	134451870	134452164	NC_006088.4.90000001-180000000.142856	0.32549	0.27356	2.02376	11.3665	0	0.039693
NC_006088.4	134530801	134530940	NC_006088.4.90000001-180000000.143185	0.3827	0.29791	2.54504	12.003	0	0.0302964
NC_006088.4	134613421	134613603	NC_006088.4.90000001-180000000.143513	0.42362	0.34077	2.34119	13.9088	0	0.0138965
NC_006088.4	134641235	134641380	NC_006088.4.90000001-180000000.143641	0.41378	0.29861	3.17868	21.2658	0	0
NC_006088.4	134674817	134674924	NC_006088.4.90000001-180000000.143784	0.40785	0.30184	2.82963	12.0883	0	0.0291028
NC_006088.4	134721207	134721430	NC_006088.4.90000001-180000000.143972	0.40201	0.33056	2.1711	13.2621	0	0.016492
NC_006088.4	134895102	134895302	NC_006088.4.90000001-180000000.144828	0.28274	0.17381	4.37101	32.7241	0	0
NC_006088.4	134968692	134968844	NC_006088.4.90000001-180000000.145220	0.49438	0.3821	2.61414	17.705	0	0.00137049
NC_006088.4	134987733	134987862	NC_006088.4.90000001-180000000.145315	0.43114	0.29802	3.47587	23.4195	0	0
NC_006088.4	135010765	135010935	NC_006088.4.90000001-180000000.145467	0.38419	0.30957	2.27239	11.0442	0	0.0484856
NC_006088.4	135034399	135034611	NC_006088.4.90000001-180000000.145638	0.28349	0.1898	3.71569	28.6352	0	0
NC_006088.4	135083083	135083728	NC_006088.4.90000001-180000000.145925	0.19988	0.16646	2.07984	16.7703	0	0.00496012
NC_006088.4	135285102	135285209	NC_006088.4.90000001-180000000.146691	0.47687	0.35702	2.6903	12.4302	0	0.0259477
NC_006088.4	135896200	135896310	NC_006088.4.90000001-180000000.148863	0.39552	0.26256	3.83699	21.2654	0	0
NC_006088.4	136463834	136464037	NC_006088.4.90000001-180000000.150806	0.23819	0.18025	2.76171	12.4839	0	0.025365
NC_006088.4	137786676	137786777	NC_006088.4.90000001-180000000.156335	0.52578	0.40695	2.56896	11.802	0	0.0331198
NC_006088.4	138143623	138143891	NC_006088.4.90000001-180000000.157174	0.46005	0.39177	1.94177	12.8574	0	0.0204559
NC_006088.4	138317121	138317272	NC_006088.4.90000001-180000000.157577	0.47256	0.38669	2.31302	11.0453	0	0.0484856
NC_006088.4	138717595	138717709	NC_006088.4.90000001-180000000.159220	0.49013	0.38302	2.52569	12.3055	0	0.0268987
NC_006088.4	138773636	138773746	NC_006088.4.90000001-180000000.159490	0.44195	0.33256	2.75678	12.2464	0	0.0268987
NC_006088.4	139516033	139516214	NC_006088.4.90000001-180000000.162063	0.16872	0.11472	3.58188	14.1761	0	0.0120389
NC_006088.4	139567239	139567447	NC_006088.4.90000001-180000000.162220	0.39302	0.3131	2.32012	14.2216	0	0.0120389
NC_006088.4	139595486	139595899	NC_006088.4.90000001-180000000.162309	0.24096	0.20272	2.02059	12.1749	0	0.0268987
NC_006088.4	139638073	139638299	NC_006088.4.90000001-180000000.162452	0.30717	0.2314	2.77859	18.7642	0	0
NC_006088.4	139711395	139711583	NC_006088.4.90000001-180000000.162697	0.407	0.29836	2.9385	21.7558	0	0
NC_006088.4	139723810	139724087	NC_006088.4.90000001-180000000.162742	0.25664	0.20634	2.32435	12.8769	0	0.0198822
NC_006088.4	139766295	139766753	NC_006088.4.90000001-180000000.162940	0.34605	0.28879	2.0811	20.2532	0	0
NC_006088.4	139783483	139783668	NC_006088.4.90000001-180000000.163002	0.31278	0.23287	2.89233	17.01	0	0.00257932
NC_006088.4	139928289	139928515	NC_006088.4.90000001-180000000.163542	0.13504	0.08972	3.75105	15.3836	0	0.00604209
NC_006088.4	140038117	140038343	NC_006088.4.90000001-180000000.163657	0.1406	0.09532	3.5764	14.5539	0	0.00998135
NC_006088.4	140436444	140436767	NC_006088.4.90000001-180000000.164758	0.41614	0.35992	1.84472	12.1221	0	0.0291028
NC_006088.4	141191302	141191498	NC_006088.4.90000001-180000000.167264	0.48094	0.39044	2.24857	15.0208	0	0.00667579
NC_006088.4	141211089	141211238	NC_006088.4.90000001-180000000.167320	0.45998	0.34735	2.80524	17.9164	0	0.00137049
NC_006088.4	141737441	141737541	NC_006088.4.90000001-180000000.168343	0.4719	0.32405	3.55877	20.2046	0	0
NC_006088.4	141738224	141738361	NC_006088.4.90000001-180000000.168347	0.32141	0.21784	3.19657	13.8416	0	0.0138965
NC_006088.4	142392906	142393055	NC_006088.4.90000001-180000000.169475	0.46017	0.36069	2.46818	14.03	0	0.0127202
NC_006088.4	142439451	142439616	NC_006088.4.90000001-180000000.169575	0.40469	0.31387	2.57526	14.7733	0	0.00941222
NC_006088.4	142458064	142458176	NC_006088.4.90000001-180000000.169610	0.47886	0.29546	4.54175	34.1919	0	0
NC_006088.4	143329290	143329491	NC_006088.4.90000001-180000000.172154	0.5134	0.41319	2.413	17.5391	0	0.00257932
NC_006088.4	143391336	143391595	NC_006088.4.90000001-180000000.172380	0.30747	0.24744	2.29851	12.9274	0	0.0193234
NC_006088.4	144135089	144135621	NC_006088.4.90000001-180000000.174978	0.16002	0.12894	2.2495	14.4195	0	0.0120389
NC_006088.4	144199818	144199965	NC_006088.4.90000001-180000000.175117	0.42595	0.33495	2.45319	12.3186	0	0.0268336
NC_006088.4	144199999	144200110	NC_006088.4.90000001-180000000.175119	0.32475	0.22568	3.38009	13.8684	0	0.0138965
NC_006088.4	144348959	144349217	NC_006088.4.90000001-180000000.175654	0.27452	0.19576	3.20065	25.9116	0	0
NC_006088.4	144372732	144372854	NC_006088.4.90000001-180000000.175805	0.36919	0.27935	2.81926	12.3246	0	0.0268336
NC_006088.4	144372876	144373115	NC_006088.4.90000001-180000000.175806	0.39622	0.31931	2.34279	17.1762	0	0.00257932
NC_006088.4	145205925	145206030	NC_006088.4.90000001-180000000.178778	0.39751	0.27077	3.52956	18.0898	0	0.00137049
NC_006088.4	145400782	145400944	NC_006088.4.90000001-180000000.179590	0.38374	0.28482	2.90275	18.5479	0	0
NC_006088.4	145743510	145743641	NC_006088.4.90000001-180000000.181070	0.44749	0.32713	3.01574	18.6172	0	0
NC_006088.4	146283395	146283503	NC_006088.4.90000001-180000000.182719	0.39657	0.29811	2.82997	12.3261	0	0.0268336
NC_006088.4	146312264	146312412	NC_006088.4.90000001-180000000.182876	0.34283	0.2483	3.10312	17.837	0	0.00137049
NC_006088.4	146707164	146707297	NC_006088.4.90000001-180000000.184663	0.40465	0.2834	3.20029	18.8	0	0
NC_006088.4	146911627	146911762	NC_006088.4.90000001-180000000.185363	0.56367	0.45876	2.21088	11.415	0	0.0391986
NC_006088.4	147734577	147734960	NC_006088.4.90000001-180000000.187307	0.36056	0.30268	2.04391	17.0178	0	0.00257932
NC_006088.4	149167308	149167449	NC_006088.4.90000001-180000000.188970	0.45757	0.33955	2.79622	15.9257	0	0.00529183
NC_006088.4	151260227	151260362	NC_006088.4.90000001-180000000.190712	0.52548	0.39282	2.84835	13.8119	0	0.0146699
NC_006088.4	152711810	152711988	NC_006088.4.90000001-180000000.192501	0.39739	0.30703	2.48998	13.413	0	0.015854
NC_006088.4	152749044	152749168	NC_006088.4.90000001-180000000.192643	0.35929	0.2666	2.91386	13.5073	0	0.015854
NC_006088.4	152759938	152760090	NC_006088.4.90000001-180000000.192693	0.35428	0.26158	2.9476	16.8279	0	0.00374665
NC_006088.4	152848623	152849192	NC_006088.4.90000001-180000000.192958	0.2325	0.19842	1.90136	13.1123	0	0.0183368
NC_006088.4	152873974	152874074	NC_006088.4.90000001-180000000.192984	0.56669	0.42603	2.60401	11.3845	0	0.0391986
NC_006088.4	152940212	152940459	NC_006088.4.90000001-180000000.193298	0.3731	0.313	2.05251	11.4692	0	0.038365
NC_006088.4	152942072	152942523	NC_006088.4.90000001-180000000.193306	0.26154	0.2193	2.04101	14.7753	0	0.00941222
NC_006088.4	152975930	152976168	NC_006088.4.90000001-180000000.193487	0.2424	0.1935	2.36079	11.3279	0	0.0406108
NC_006088.4	153006495	153006847	NC_006088.4.90000001-180000000.193625	0.33984	0.29266	1.87751	11.3143	0	0.0409955
NC_006088.4	153147952	153148054	NC_006088.4.90000001-180000000.193969	0.5312	0.36225	4.27346	26.8691	0	0
NC_006088.4	153340039	153340139	NC_006088.4.90000001-180000000.194498	0.33082	0.18948	5.11903	25.1357	0	0
NC_006088.4	153602550	153602708	NC_006088.4.90000001-180000000.195367	0.30397	0.22226	3.01104	16.074	0	0.00529183
NC_006088.4	153628570	153628734	NC_006088.4.90000001-180000000.195462	0.17265	0.11968	3.42171	12.2477	0	0.0268987
NC_006088.4	153672568	153672689	NC_006088.4.90000001-180000000.195604	0.47682	0.36892	2.64535	13.7066	0	0.0152815
NC_006088.4	153701146	153701357	NC_006088.4.90000001-180000000.195721	0.34755	0.26801	2.61848	18.065	0	0.00137049
NC_006088.4	154688649	154688844	NC_006088.4.90000001-180000000.198091	0.43783	0.35006	2.35851	15.9256	0	0.00529183
NC_006088.4	155290408	155290518	NC_006088.4.90000001-180000000.199737	0.50578	0.3701	3.06916	17.736	0	0.00137049
NC_006088.4	155320630	155320827	NC_006088.4.90000001-180000000.199853	0.40626	0.32707	2.30717	13.7077	0	0.0152815
NC_006088.4	156298370	156298545	NC_006088.4.90000001-180000000.203579	0.31501	0.24746	2.48406	11.761	0	0.0334751
NC_006088.4	156309026	156309206	NC_006088.4.90000001-180000000.203637	0.3232	0.25277	2.49962	12.1357	0	0.0291028
NC_006088.4	156363644	156363790	NC_006088.4.90000001-180000000.203852	0.27008	0.15759	4.95051	28.6987	0	0
NC_006088.4	156405532	156406102	NC_006088.4.90000001-180000000.203997	0.12718	0.10086	2.41083	14.5815	0	0.00998135
NC_006088.4	156517843	156517953	NC_006088.4.90000001-180000000.204351	0.47477	0.34315	3.07873	17.4267	0	0.00257932
NC_006088.4	156527638	156527958	NC_006088.4.90000001-180000000.204387	0.42512	0.34752	2.21691	20.8238	0	0
NC_006088.4	156743428	156743738	NC_006088.4.90000001-180000000.205224	0.13578	0.10158	2.82833	12.3378	0	0.0268336
NC_006088.4	156806416	156806517	NC_006088.4.90000001-180000000.205482	0.52647	0.41326	2.49371	11.039	0	0.048906
NC_006088.4	156856617	156856762	NC_006088.4.90000001-180000000.205650	0.31559	0.24464	2.62367	11.2135	0	0.0430531
NC_006088.4	159074328	159074442	NC_006088.4.90000001-180000000.209237	0.3758	0.26817	3.16331	15.2324	0	0.00604209
NC_006088.4	159222094	159222451	NC_006088.4.90000001-180000000.210014	0.3951	0.30707	2.56016	31.1501	0	0
NC_006088.4	159239227	159239347	NC_006088.4.90000001-180000000.210112	0.47519	0.37817	2.44472	11.279	0	0.0413202
NC_006088.4	159245292	159245507	NC_006088.4.90000001-180000000.210159	0.38516	0.30989	2.31812	14.9062	0	0.00667579
NC_006088.4	159259077	159259284	NC_006088.4.90000001-180000000.210239	0.29397	0.22555	2.68553	13.8876	0	0.0138965
NC_006088.4	159268324	159268533	NC_006088.4.90000001-180000000.210296	0.28654	0.22054	2.63019	14.4841	0	0.0120389
NC_006088.4	159408066	159408201	NC_006088.4.90000001-180000000.210833	0.51273	0.3857	2.81052	19.1735	0	0
NC_006088.4	161631245	161631506	NC_006088.4.90000001-180000000.214204	0.43028	0.36803	1.91038	11.1208	0	0.0452923
NC_006088.4	162655697	162655809	NC_006088.4.90000001-180000000.216385	0.47284	0.35736	2.84859	13.4655	0	0.015854
NC_006088.4	163004985	163005101	NC_006088.4.90000001-180000000.217505	0.51233	0.32434	4.58108	35.1172	0	0
NC_006088.4	163082740	163082955	NC_006088.4.90000001-180000000.217717	0.33229	0.26988	2.25901	12.1787	0	0.0268987
NC_006088.4	163103604	163103835	NC_006088.4.90000001-180000000.217743	0.38853	0.28998	2.86116	26.179	0	0
NC_006088.4	163178765	163178935	NC_006088.4.90000001-180000000.217954	0.25152	0.14991	4.71214	30.1991	0	0
NC_006088.4	163376215	163376345	NC_006088.4.90000001-180000000.218468	0.49636	0.31955	4.04469	34.0319	0	0
NC_006088.4	163426704	163426841	NC_006088.4.90000001-180000000.218567	0.302	0.22946	2.72966	11.0828	0	0.046137
NC_006088.4	163515534	163515907	NC_006088.4.90000001-180000000.218956	0.28887	0.20376	3.28047	40.3179	0	0
NC_006088.4	163720754	163720896	NC_006088.4.90000001-180000000.219654	0.45329	0.35286	2.58264	14.1452	0	0.0120389
NC_006088.4	163860137	163860299	NC_006088.4.90000001-180000000.219923	0.36953	0.28761	2.46091	11.8037	0	0.0331198
NC_006088.4	163964962	163965089	NC_006088.4.90000001-180000000.220068	0.588	0.4414	2.67546	17.079	0	0.00257932
NC_006088.4	163965147	163965253	NC_006088.4.90000001-180000000.220070	0.49023	0.34019	3.30419	18.2621	0	0
NC_006088.4	164936201	164936467	NC_006088.4.90000001-180000000.221905	0.31508	0.23271	2.92655	26.1549	0	0
NC_006088.4	164968628	164969032	NC_006088.4.90000001-180000000.222010	0.23514	0.19849	1.99238	11.3101	0	0.0409955
NC_006088.4	165003676	165003937	NC_006088.4.90000001-180000000.222149	0.32355	0.24952	2.60148	20.6159	0	0
NC_006088.4	165174071	165174287	NC_006088.4.90000001-180000000.222663	0.43418	0.35484	2.25792	15.08	0	0.00667579
NC_006088.4	165199652	165199830	NC_006088.4.90000001-180000000.222731	0.48806	0.40188	2.17802	12.3789	0	0.0263269
NC_006088.4	165209711	165209821	NC_006088.4.90000001-180000000.222759	0.51536	0.39229	2.71672	13.9228	0	0.0138965
NC_006088.4	165386897	165387133	NC_006088.4.90000001-180000000.223486	0.33091	0.26749	2.26426	12.9795	0	0.0193234
NC_006088.4	165407450	165407658	NC_006088.4.90000001-180000000.223582	0.44056	0.36147	2.23249	14.0241	0	0.0127202
NC_006088.4	165454850	165455128	NC_006088.4.90000001-180000000.223853	0.3734	0.31038	2.14231	14.7784	0	0.00941222
NC_006088.4	167033568	167033804	NC_006088.4.90000001-180000000.230602	0.34964	0.2591	2.90913	25.0336	0	0
NC_006088.4	167034099	167034322	NC_006088.4.90000001-180000000.230608	0.24291	0.1765	3.04317	18.2621	0	0
NC_006088.4	167197266	167197398	NC_006088.4.90000001-180000000.231453	0.3943	0.29958	2.73893	11.4336	0	0.038365
NC_006088.4	167266441	167266912	NC_006088.4.90000001-180000000.231820	0.32756	0.27985	1.91742	15.8668	0	0.00529183
NC_006088.4	167301923	167302075	NC_006088.4.90000001-180000000.231980	0.34608	0.26891	2.79111	11.7355	0	0.0344687
NC_006088.4	167500687	167500822	NC_006088.4.90000001-180000000.232875	0.42914	0.33808	2.43781	11.7185	0	0.0344687
NC_006088.4	169544654	169544815	NC_006088.4.90000001-180000000.239858	0.34136	0.26214	2.58968	12.548	0	0.0250665
NC_006088.4	169598740	169599048	NC_006088.4.90000001-180000000.240167	0.43552	0.36755	2.01071	13.4068	0	0.015854
NC_006088.4	169661173	169661280	NC_006088.4.90000001-180000000.240522	0.32987	0.20101	4.51176	23.1386	0	0
NC_006088.4	169824136	169824337	NC_006088.4.90000001-180000000.241266	0.38968	0.30581	2.49321	15.3776	0	0.00604209
NC_006088.4	169929418	169929541	NC_006088.4.90000001-180000000.241621	0.31687	0.22495	3.27267	15.1946	0	0.00604209
NC_006088.4	169944235	169944523	NC_006088.4.90000001-180000000.241706	0.31695	0.26009	2.17879	13.9409	0	0.0138965
NC_006088.4	170487790	170487909	NC_006088.4.90000001-180000000.243729	0.41134	0.31303	2.75188	13.2146	0	0.0169766
NC_006088.4	170823597	170823765	NC_006088.4.90000001-180000000.245235	0.43274	0.33323	2.7042	17.4244	0	0.00257932
NC_006088.4	171040678	171040909	NC_006088.4.90000001-180000000.246289	0.29619	0.22946	2.59339	16.0692	0	0.00529183
NC_006088.4	172360975	172361100	NC_006088.4.90000001-180000000.249838	0.56955	0.45239	2.41775	13.4761	0	0.015854
NC_006088.4	172398905	172399051	NC_006088.4.90000001-180000000.250094	0.27681	0.19977	3.09764	14.3716	0	0.0120389
NC_006088.4	172644623	172644756	NC_006088.4.90000001-180000000.250845	0.54902	0.438	2.32223	12.599	0	0.0250665
NC_006088.4	172856251	172856565	NC_006088.4.90000001-180000000.251667	0.27956	0.22729	2.24282	14.6424	0	0.00998135
NC_006088.4	172937790	172937924	NC_006088.4.90000001-180000000.252165	0.44336	0.31112	3.58654	24.8871	0	0
NC_006088.4	172940595	172940788	NC_006088.4.90000001-180000000.252174	0.32368	0.24411	2.82106	17.0186	0	0.00257932
NC_006088.4	173192282	173192728	NC_006088.4.90000001-180000000.253283	0.25991	0.22346	1.87984	11.0902	0	0.045665
NC_006088.4	173243846	173244054	NC_006088.4.90000001-180000000.253440	0.38208	0.30381	2.42715	15.4275	0	0.00604209
NC_006088.4	173284452	173284605	NC_006088.4.90000001-180000000.253560	0.34235	0.26647	2.5632	11.7123	0	0.0348432
NC_006088.4	173361576	173361805	NC_006088.4.90000001-180000000.253750	0.42303	0.29532	3.29821	33.9163	0	0
NC_006088.4	173605278	173605427	NC_006088.4.90000001-180000000.254261	0.38917	0.29141	2.83745	15.5641	0	0.00604209
NC_006088.4	175877421	175877571	NC_006088.4.90000001-180000000.262751	0.25982	0.18941	3.0059	12.9615	0	0.0193234
NC_006088.4	176014674	176014906	NC_006088.4.90000001-180000000.263291	0.43131	0.32108	2.94007	29.6724	0	0
NC_006088.4	177571208	177571308	NC_006088.4.90000001-180000000.268662	0.39436	0.2691	3.54732	17.4761	0	0.00257932
NC_006088.4	177708857	177709140	NC_006088.4.90000001-180000000.269122	0.33429	0.27104	2.29653	15.9322	0	0.00529183
NC_006088.4	178085236	178085373	NC_006088.4.90000001-180000000.270348	0.57083	0.45756	2.55118	13.0573	0	0.0189173
NC_006088.4	178110010	178110160	NC_006088.4.90000001-180000000.270439	0.554	0.4581	2.13769	11.7179	0	0.0344687
NC_006088.4	178111690	178112154	NC_006088.4.90000001-180000000.270449	0.25876	0.22186	1.89778	12.037	0	0.0298894
NC_006088.4	178115366	178115472	NC_006088.4.90000001-180000000.270467	0.50957	0.38817	2.71849	14.2311	0	0.0120389
NC_006088.4	178130521	178130736	NC_006088.4.90000001-180000000.270523	0.38919	0.31366	2.31394	14.9719	0	0.00667579
NC_006088.4	178132602	178132715	NC_006088.4.90000001-180000000.270537	0.49597	0.35475	3.31434	20.228	0	0
NC_006088.4	178137910	178138023	NC_006088.4.90000001-180000000.270551	0.49398	0.37858	2.57568	12.3598	0	0.0263269
NC_006088.4	178197561	178197756	NC_006088.4.90000001-180000000.270818	0.34513	0.25593	2.9107	20.4886	0	0
NC_006088.4	178220113	178220254	NC_006088.4.90000001-180000000.270895	0.47752	0.35709	2.95082	19.6932	0	0
NC_006088.4	178300530	178300652	NC_006088.4.90000001-180000000.271236	0.49114	0.39015	2.40784	11.2628	0	0.0413202
NC_006088.4	178363450	178363662	NC_006088.4.90000001-180000000.271527	0.37734	0.30658	2.29854	13.6942	0	0.0152815
NC_006088.4	178446593	178446732	NC_006088.4.90000001-180000000.271890	0.49989	0.38166	2.74839	17.4105	0	0.00257932
NC_006088.4	178452355	178452484	NC_006088.4.90000001-180000000.271905	0.37713	0.29187	2.61972	11.4069	0	0.0391986
NC_006088.4	179105371	179105596	NC_006088.4.90000001-180000000.274337	0.29308	0.22774	2.56936	15.0963	0	0.00667579
NC_006088.4	179254140	179254358	NC_006088.4.90000001-180000000.274675	0.44374	0.35661	2.31808	15.513	0	0.00604209
NC_006088.4	179813023	179813216	NC_006088.4.90000001-180000000.276711	0.40556	0.31763	2.53529	16.8951	0	0.00374665
NC_006088.4	179823959	179824146	NC_006088.4.90000001-180000000.276761	0.40657	0.33037	2.2387	12.0698	0	0.029537
NC_006088.4	179852222	179852338	NC_006088.4.90000001-180000000.276872	0.44309	0.33535	2.71164	13.2597	0	0.016492
NC_006088.4	179949227	179949335	NC_006088.4.90000001-180000000.277316	0.48232	0.3671	2.73151	13.5434	0	0.015854
NC_006088.4	181886103	181886292	NC_006088.4.180000001-196202544.5397	0.41357	0.3357	2.30976	13.2118	0	0.0169766
NC_006088.4	182791329	182791537	NC_006088.4.180000001-196202544.8090	0.35143	0.276	2.49575	15.4985	0	0.00604209
NC_006088.4	182867949	182868070	NC_006088.4.180000001-196202544.8364	0.56278	0.44192	2.45235	11.4467	0	0.038365
NC_006088.4	183107575	183107683	NC_006088.4.180000001-196202544.8595	0.49029	0.35314	3.06041	16.266	0	0.00529183
NC_006088.4	183848216	183848337	NC_006088.4.180000001-196202544.10273	0.40072	0.29031	3.12199	16.2735	0	0.00529183
NC_006088.4	184078364	184078617	NC_006088.4.180000001-196202544.10780	0.35307	0.28885	2.24724	14.2322	0	0.0120389
NC_006088.4	184641366	184641511	NC_006088.4.180000001-196202544.11843	0.43559	0.34309	2.4543	13.0323	0	0.0189173
NC_006088.4	184732499	184732800	NC_006088.4.180000001-196202544.12115	0.31698	0.25385	2.38137	18.1383	0	0
NC_006088.4	184879092	184879335	NC_006088.4.180000001-196202544.12623	0.47229	0.40277	1.90699	11.4626	0	0.038365
NC_006088.4	185100406	185100630	NC_006088.4.180000001-196202544.13749	0.4212	0.34453	2.20963	14.3121	0	0.0120389
NC_006088.4	186519998	186520535	NC_006088.4.180000001-196202544.18935	0.31111	0.23935	2.60845	39.2513	0	0
NC_006088.4	186725225	186725484	NC_006088.4.180000001-196202544.19955	0.31637	0.24356	2.63781	19.8937	0	0
NC_006088.4	186735152	186735411	NC_006088.4.180000001-196202544.20013	0.31637	0.24356	2.63781	19.8937	0	0
NC_006088.4	186785839	186786019	NC_006088.4.180000001-196202544.20256	0.36887	0.29885	2.26657	11.2388	0	0.0421582
NC_006088.4	186899369	186899551	NC_006088.4.180000001-196202544.20779	0.4878	0.38278	2.52627	18.4863	0	0
NC_006088.4	187427788	187427913	NC_006088.4.180000001-196202544.22344	0.50066	0.40088	2.37276	11.442	0	0.038365
NC_006088.4	187530417	187530521	NC_006088.4.180000001-196202544.22703	0.49227	0.38256	2.60313	12.0006	0	0.0302964
NC_006088.4	187558895	187559049	NC_006088.4.180000001-196202544.22788	0.48166	0.3895	2.27852	12.4367	0	0.0259477
NC_006088.4	187591777	187591907	NC_006088.4.180000001-196202544.22905	0.45902	0.34377	3.11868	18.4285	0	0
NC_006088.4	188831941	188832078	NC_006088.4.180000001-196202544.26245	0.49633	0.39767	2.40712	12.5044	0	0.025365
NC_006088.4	189207067	189207181	NC_006088.4.180000001-196202544.27738	0.34207	0.25356	2.88283	12.2924	0	0.0268987
NC_006088.4	190185019	190185120	NC_006088.4.180000001-196202544.31219	0.43593	0.33087	2.73569	11.052	0	0.0484856
NC_006088.4	190205792	190205955	NC_006088.4.180000001-196202544.31292	0.40365	0.31524	2.52117	13.6714	0	0.015854
NC_006088.4	190606547	190606721	NC_006088.4.180000001-196202544.32755	0.54898	0.44516	2.25983	15.5869	0	0.00529183
NC_006088.4	190742847	190742969	NC_006088.4.180000001-196202544.33195	0.59787	0.45817	2.57791	15.6953	0	0.00529183
NC_006088.4	190919320	190919423	NC_006088.4.180000001-196202544.33689	0.50933	0.35167	3.39311	19.5413	0	0
NC_006088.4	190983316	190983451	NC_006088.4.180000001-196202544.33844	0.48139	0.38615	2.34017	12.1616	0	0.0280475
NC_006088.4	190998300	190998434	NC_006088.4.180000001-196202544.33901	0.35813	0.26141	2.98121	15.7352	0	0.00529183
NC_006088.4	191200376	191200575	NC_006088.4.180000001-196202544.34327	0.41362	0.36385	4.23727	15.4493	0	0.00604209
NC_006088.4	191538511	191538685	NC_006088.4.180000001-196202544.35101	0.32432	0.23865	2.95899	17.5303	0	0.00257932
NC_006088.4	192021590	192021710	NC_006088.4.180000001-196202544.36653	0.32235	0.22976	3.19009	13.8952	0	0.0138965
NC_006088.4	192047203	192047442	NC_006088.4.180000001-196202544.36794	0.15734	0.11395	3.06903	13.2395	0	0.0169766
NC_006088.4	192073962	192074076	NC_006088.4.180000001-196202544.36926	0.41073	0.30894	2.77204	13.2217	0	0.0169766
NC_006088.4	192196267	192196527	NC_006088.4.180000001-196202544.37557	0.36283	0.2835	2.52698	21.106	0	0
NC_006088.4	192216191	192216427	NC_006088.4.180000001-196202544.37662	0.20953	0.15748	2.80098	14.4899	0	0.0117396
NC_006088.4	192346919	192347078	NC_006088.4.180000001-196202544.38425	0.43667	0.29714	3.57336	31.829	0	0
NC_006088.4	192508055	192508556	NC_006088.4.180000001-196202544.39379	0.26286	0.21279	2.27927	22.6199	0	0
NC_006088.4	192537736	192537967	NC_006088.4.180000001-196202544.39549	0.38588	0.30371	2.47591	18.9187	0	0
NC_006088.4	192578278	192578380	NC_006088.4.180000001-196202544.39845	0.50342	0.36328	3.22503	18.2641	0	0
NC_006088.4	192615733	192616119	NC_006088.4.180000001-196202544.40055	0.27977	0.21365	2.68586	26.7852	0	0
NC_006088.4	193741420	193741559	NC_006088.4.180000001-196202544.44486	0.35716	0.22663	4.29718	27.373	0	0
NC_006088.4	193748057	193748204	NC_006088.4.180000001-196202544.44507	0.28479	0.20249	3.28949	15.2976	0	0.00604209
NC_006088.4	193838885	193839207	NC_006088.4.180000001-196202544.44870	0.28147	0.22276	2.44758	18.9936	0	0
NC_006088.4	193840254	193840383	NC_006088.4.180000001-196202544.44883	0.22703	0.15825	3.35255	12.6198	0	0.0246964
NC_006088.4	193875502	193875682	NC_006088.4.180000001-196202544.45045	0.33781	0.25569	3.29582	19.1603	0	0
NC_006088.4	193945384	193945493	NC_006088.4.180000001-196202544.45332	0.40815	0.29591	3.08421	15.3282	0	0.00604209
NC_006088.4	193947894	193948191	NC_006088.4.180000001-196202544.45348	0.28769	0.22279	2.61839	21.0591	0	0
NC_006088.4	193979492	193979736	NC_006088.4.180000001-196202544.45509	0.38455	0.31245	2.2653	15.7637	0	0.00529183
NC_006088.4	193984452	193984553	NC_006088.4.180000001-196202544.45535	0.42223	0.30294	3.12264	14.8077	0	0.00852012
NC_006088.4	194019893	194020093	NC_006088.4.180000001-196202544.45716	0.21997	0.13823	4.31694	27.4216	0	0
NC_006088.4	194035957	194036173	NC_006088.4.180000001-196202544.45786	0.35899	0.25577	3.22189	29.3087	0	0
NC_006088.4	194052848	194053228	NC_006088.4.180000001-196202544.45840	0.24679	0.19667	2.69992	21.2802	0	0
NC_006088.4	194092310	194092468	NC_006088.4.180000001-196202544.46036	0.24783	0.1641	3.75966	19.1438	0	0
NC_006088.4	194105866	194106031	NC_006088.4.180000001-196202544.46096	0.38269	0.29305	2.66566	15.4059	0	0.00604209
NC_006088.4	194114555	194114679	NC_006088.4.180000001-196202544.46167	0.31297	0.22159	3.26448	13.6909	0	0.0152815
NC_006088.4	194124818	194125045	NC_006088.4.180000001-196202544.46203	0.32131	0.25058	2.52806	16.4689	0	0.00529183
NC_006089.4	229344	229444	NC_006089.4.1-90000000.482	0.58228	0.34842	4.31689	31.4034	0	0
NC_006089.4	2211514	2211805	NC_006089.4.1-90000000.5833	0.3625	0.21803	4.2158	47.7213	0	0
NC_006089.4	2218892	2219180	NC_006089.4.1-90000000.5861	0.36118	0.22062	4.08881	44.9081	0	0
NC_006089.4	2475831	2476041	NC_006089.4.1-90000000.6846	0.43192	0.25331	5.05493	68.731	0	0
NC_006089.4	2869934	2870052	NC_006089.4.1-90000000.8625	0.4307	0.29601	3.55372	20.7688	0	0
NC_006089.4	3341582	3341773	NC_006089.4.1-90000000.10242	0.39528	0.32489	2.2999	11.947	0	0.031249
NC_006089.4	5390630	5390777	NC_006089.4.1-90000000.18476	0.41398	0.32674	2.39549	11.2856	0	0.0409955
NC_006089.4	5557499	5557622	NC_006089.4.1-90000000.19276	0.46923	0.35541	2.7365	15.1849	0	0.00604209
NC_006089.4	6008272	6008388	NC_006089.4.1-90000000.21842	0.63052	0.46093	3.09777	23.4153	0	0
NC_006089.4	6019896	6020042	NC_006089.4.1-90000000.21920	0.4328	0.34512	2.39018	12.0172	0	0.0298894
NC_006089.4	6253944	6254078	NC_006089.4.1-90000000.23197	0.15679	0.10267	3.86768	11.4877	0	0.0380056
NC_006089.4	6645888	6646020	NC_006089.4.1-90000000.25047	0.28414	0.19906	3.31553	14.9801	0	0.00667579
NC_006089.4	6816586	6816692	NC_006089.4.1-90000000.25791	0.38667	0.27991	3.06984	14.4648	0	0.0120389
NC_006089.4	7337935	7338089	NC_006089.4.1-90000000.27858	0.18871	0.11955	4.19816	17.3895	0	0.00257932
NC_006089.4	7734403	7734511	NC_006089.4.1-90000000.29582	0.5268	0.3926	3.18305	17.6545	0	0.00137049
NC_006089.4	8172661	8172955	NC_006089.4.1-90000000.31407	0.3039	0.25492	2.04616	11.4921	0	0.037518
NC_006089.4	8269553	8269981	NC_006089.4.1-90000000.31935	0.32636	0.25736	2.45869	28.2177	0	0
NC_006089.4	8294537	8294683	NC_006089.4.1-90000000.32039	0.36085	0.24827	3.61867	21.8184	0	0
NC_006089.4	8453183	8453465	NC_006089.4.1-90000000.32803	0.30216	0.2232	2.97851	26.3261	0	0
NC_006089.4	9007707	9007818	NC_006089.4.1-90000000.35314	0.39923	0.28306	3.28538	16.6998	0	0.00529183
NC_006089.4	9019686	9019866	NC_006089.4.1-90000000.35375	0.45343	0.31597	3.38452	31.7804	0	0
NC_006089.4	9086711	9087240	NC_006089.4.1-90000000.35680	0.19619	0.1642	2.05739	13.4078	0	0.015854
NC_006089.4	9164571	9164749	NC_006089.4.1-90000000.36022	0.42677	0.31872	2.82211	21.7418	0	0
NC_006089.4	9193824	9194144	NC_006089.4.1-90000000.36142	0.32054	0.22075	3.52448	44.8423	0	0
NC_006089.4	9260588	9260789	NC_006089.4.1-90000000.36344	0.31013	0.24406	2.45866	12.9001	0	0.0198822
NC_006089.4	9539441	9539704	NC_006089.4.1-90000000.37377	0.22635	0.15189	3.7814	30.4541	0	0
NC_006089.4	9779592	9779693	NC_006089.4.1-90000000.38009	0.52039	0.39045	2.80942	12.5348	0	0.025365
NC_006089.4	9992156	9992297	NC_006089.4.1-90000000.38947	0.50264	0.37298	2.87665	20.2849	0	0
NC_006089.4	10736362	10736504	NC_006089.4.1-90000000.42296	0.43087	0.31763	3.0705	19.5782	0	0
NC_006089.4	10736643	10737102	NC_006089.4.1-90000000.42299	0.35035	0.29533	2.00872	19.1778	0	0
NC_006089.4	12546324	12546435	NC_006089.4.1-90000000.48390	0.53354	0.41992	2.484	12.4053	0	0.0263269
NC_006089.4	12701383	12701491	NC_006089.4.1-90000000.49009	0.51963	0.36206	3.30846	20.5858	0	0
NC_006089.4	12701596	12701711	NC_006089.4.1-90000000.49011	0.47135	0.35788	2.64023	13.278	0	0.016492
NC_006089.4	12746156	12746275	NC_006089.4.1-90000000.49222	0.58254	0.43188	2.80383	17.4297	0	0.00257932
NC_006089.4	12824922	12825129	NC_006089.4.1-90000000.49629	0.49396	0.40528	2.12596	13.2684	0	0.016492
NC_006089.4	13064886	13064995	NC_006089.4.1-90000000.50365	0.2331	0.12471	5.6407	20.5725	0	0
NC_006089.4	13350225	13350397	NC_006089.4.1-90000000.51448	0.40896	0.31772	2.92196	18.3658	0	0
NC_006089.4	13385748	13386037	NC_006089.4.1-90000000.51621	0.38538	0.32537	2.00824	12.8664	0	0.0204559
NC_006089.4	13441134	13441277	NC_006089.4.1-90000000.51960	0.43367	0.33565	2.56921	14.2165	0	0.0120389
NC_006089.4	13501276	13501382	NC_006089.4.1-90000000.52323	0.49861	0.3839	2.63041	12.6841	0	0.0233309
NC_006089.4	13520252	13520572	NC_006089.4.1-90000000.52468	0.25309	0.20024	2.44812	15.8329	0	0.00529183
NC_006089.4	13534429	13534602	NC_006089.4.1-90000000.52558	0.37263	0.28881	2.58979	15.0351	0	0.00667579
NC_006089.4	13556803	13557215	NC_006089.4.1-90000000.52697	0.25852	0.21025	2.24517	17.7133	0	0.00137049
NC_006089.4	13663888	13664065	NC_006089.4.1-90000000.53363	0.48518	0.39642	2.29543	13.0907	0	0.0183368
NC_006089.4	13690294	13690641	NC_006089.4.1-90000000.53508	0.3756	0.29717	2.43981	26.8658	0	0
NC_006089.4	13789182	13789302	NC_006089.4.1-90000000.54035	0.51307	0.40118	2.52213	12.4977	0	0.025365
NC_006089.4	13844638	13845034	NC_006089.4.1-90000000.54398	0.21338	0.1745	2.20961	13.2999	0	0.016492
NC_006089.4	13884454	13884584	NC_006089.4.1-90000000.54614	0.3793	0.27812	2.98359	16.1745	0	0.00529183
NC_006089.4	13948223	13948401	NC_006089.4.1-90000000.55116	0.39778	0.30296	2.71874	18.5522	0	0
NC_006089.4	14502964	14503129	NC_006089.4.1-90000000.57245	0.39504	0.31003	2.50317	13.3263	0	0.015854
NC_006089.4	14554913	14555164	NC_006089.4.1-90000000.57517	0.34049	0.24935	2.99064	27.3132	0	0
NC_006089.4	14660761	14660880	NC_006089.4.1-90000000.58062	0.18799	0.12285	3.88172	11.9396	0	0.031249
NC_006089.4	14693091	14693336	NC_006089.4.1-90000000.58249	0.1443	0.10525	3.01139	12.2417	0	0.0268987
NC_006089.4	14890094	14890298	NC_006089.4.1-90000000.59291	0.31343	0.2536	2.28719	11.0421	0	0.0484856
NC_006089.4	15081436	15081572	NC_006089.4.1-90000000.60343	0.41953	0.33256	2.43314	11.3063	0	0.0409955
NC_006089.4	15273202	15273318	NC_006089.4.1-90000000.61381	0.42648	0.31631	2.89723	14.8213	0	0.00758223
NC_006089.4	15648133	15648239	NC_006089.4.1-90000000.62989	0.51817	0.38596	2.87806	15.5401	0	0.00604209
NC_006089.4	15648328	15648508	NC_006089.4.1-90000000.62991	0.54339	0.45062	2.23045	13.3708	0	0.015854
NC_006089.4	15707486	15707649	NC_006089.4.1-90000000.63329	0.31397	0.23108	2.93861	15.7386	0	0.00529183
NC_006089.4	15812680	15812914	NC_006089.4.1-90000000.63897	0.23298	0.17554	2.76679	14.6941	0	0.00998135
NC_006089.4	15833979	15834107	NC_006089.4.1-90000000.64022	0.35367	0.25888	2.86805	13.1311	0	0.0176987
NC_006089.4	16331014	16331322	NC_006089.4.1-90000000.66123	0.35235	0.27555	2.5477	24.0375	0	0
NC_006089.4	16738277	16738408	NC_006089.4.1-90000000.67620	0.43702	0.34483	2.54503	12.3423	0	0.0268336
NC_006089.4	17006962	17007151	NC_006089.4.1-90000000.68772	0.27027	0.20346	2.77606	14.2129	0	0.0120389
NC_006089.4	17055112	17055213	NC_006089.4.1-90000000.69050	0.4901	0.37141	2.7645	13.0045	0	0.0193234
NC_006089.4	17121191	17121358	NC_006089.4.1-90000000.69462	0.4719	0.39084	2.12138	11.0636	0	0.0475966
NC_006089.4	17255750	17255938	NC_006089.4.1-90000000.70031	0.40117	0.32601	2.25009	11.8468	0	0.031507
NC_006089.4	17449874	17449996	NC_006089.4.1-90000000.70687	0.41405	0.30544	2.88893	13.804	0	0.0146699
NC_006089.4	17465571	17465769	NC_006089.4.1-90000000.70763	0.46591	0.36679	2.38549	16.4627	0	0.00529183
NC_006089.4	17481621	17481916	NC_006089.4.1-90000000.70835	0.38801	0.26299	3.50752	47.2458	0	0
NC_006089.4	17730703	17730865	NC_006089.4.1-90000000.71909	0.44686	0.36016	2.32086	12.8634	0	0.0204559
NC_006089.4	17732685	17732813	NC_006089.4.1-90000000.71918	0.31016	0.21965	3.38502	15.2963	0	0.00604209
NC_006089.4	17783230	17783683	NC_006089.4.1-90000000.72161	0.19714	0.16266	2.14709	13.7168	0	0.0152815
NC_006089.4	18965259	18965365	NC_006089.4.1-90000000.76094	0.47106	0.36069	2.69882	12.1952	0	0.0268987
NC_006089.4	19944031	19944142	NC_006089.4.1-90000000.79120	0.32573	0.23241	3.11227	12.3014	0	0.0268987
NC_006089.4	20121231	20121351	NC_006089.4.1-90000000.79941	0.29371	0.1933	3.83161	17.4989	0	0.00257932
NC_006089.4	20194982	20195104	NC_006089.4.1-90000000.80327	0.37932	0.27249	3.18148	16.353	0	0.00529183
NC_006089.4	20388868	20388985	NC_006089.4.1-90000000.80963	0.23781	0.16401	3.43163	11.8417	0	0.031507
NC_006089.4	21578568	21578786	NC_006089.4.1-90000000.84902	0.56555	0.4742	2.04802	14.4684	0	0.0120389
NC_006089.4	22195746	22195999	NC_006089.4.1-90000000.87378	0.31202	0.243	2.62093	18.6536	0	0
NC_006089.4	22196086	22196232	NC_006089.4.1-90000000.87380	0.35248	0.23625	3.69972	23.862	0	0
NC_006089.4	22309183	22309306	NC_006089.4.1-90000000.87945	0.48284	0.38319	2.37701	11.131	0	0.0452923
NC_006089.4	22332532	22332785	NC_006089.4.1-90000000.88042	0.38202	0.31232	2.20855	15.0933	0	0.00667579
NC_006089.4	22365380	22365502	NC_006089.4.1-90000000.88172	0.56563	0.43783	2.45352	11.7754	0	0.0334751
NC_006089.4	22765551	22765712	NC_006089.4.1-90000000.89632	0.34971	0.26834	2.67488	14.4879	0	0.0117396
NC_006089.4	22771631	22771754	NC_006089.4.1-90000000.89655	0.44721	0.34181	2.64804	13.1064	0	0.0183368
NC_006089.4	22775080	22775303	NC_006089.4.1-90000000.89670	0.3909	0.31831	2.22306	13.7324	0	0.0152815
NC_006089.4	22802743	22802936	NC_006089.4.1-90000000.89802	0.43055	0.34419	2.40436	16.073	0	0.00529183
NC_006089.4	23590640	23590753	NC_006089.4.1-90000000.92138	0.27142	0.19418	3.1594	11.6766	0	0.0348432
NC_006089.4	24065994	24066128	NC_006089.4.1-90000000.94068	0.42091	0.32134	2.71975	15.1424	0	0.00667579
NC_006089.4	24091795	24091959	NC_006089.4.1-90000000.94267	0.32014	0.25381	4.44574	17.7828	0	0.00137049
NC_006089.4	24117051	24117413	NC_006089.4.1-90000000.94416	0.25174	0.19525	2.58265	21.5802	0	0
NC_006089.4	24490913	24491119	NC_006089.4.1-90000000.96458	0.29087	0.2269	2.52639	13.0844	0	0.0189173
NC_006089.4	24572837	24572984	NC_006089.4.1-90000000.96736	0.36815	0.27206	2.99916	17.0826	0	0.00257932
NC_006089.4	24964445	24964632	NC_006089.4.1-90000000.98108	0.38145	0.28642	2.78977	19.6705	0	0
NC_006089.4	25214017	25214228	NC_006089.4.1-90000000.99115	0.38626	0.31849	2.1502	11.6418	0	0.0365004
NC_006089.4	25249138	25249269	NC_006089.4.1-90000000.99269	0.53926	0.43032	2.39991	13.1829	0	0.0169766
NC_006089.4	25550024	25550221	NC_006089.4.1-90000000.100164	0.42938	0.35146	2.23045	12.8032	0	0.0217041
NC_006089.4	25586157	25586268	NC_006089.4.1-90000000.100280	0.42725	0.32657	2.68679	11.8266	0	0.0320494
NC_006089.4	25733835	25734046	NC_006089.4.1-90000000.100651	0.40046	0.31997	2.37341	15.8535	0	0.00529183
NC_006089.4	25758363	25758574	NC_006089.4.1-90000000.100725	0.29375	0.2274	2.58183	14.6089	0	0.00998135
NC_006089.4	25795407	25795516	NC_006089.4.1-90000000.100849	0.19539	0.12775	3.90402	11.6029	0	0.037518
NC_006089.4	25982447	25982553	NC_006089.4.1-90000000.101457	0.40201	0.19834	7.14756	48.2122	0	0
NC_006089.4	25993980	25994203	NC_006089.4.1-90000000.101491	0.30535	0.22994	2.79517	19.2707	0	0
NC_006089.4	26038856	26039079	NC_006089.4.1-90000000.101649	0.30148	0.22463	2.86912	19.8284	0	0
NC_006089.4	26045437	26045591	NC_006089.4.1-90000000.101676	0.46168	0.36964	2.36654	13.0756	0	0.0189173
NC_006089.4	26261364	26261516	NC_006089.4.1-90000000.102310	0.49853	0.40833	2.25646	11.6023	0	0.037518
NC_006089.4	26376689	26376805	NC_006089.4.1-90000000.102745	0.31364	0.21739	3.39597	15.2927	0	0.00604209
NC_006089.4	27274151	27274279	NC_006089.4.1-90000000.105453	0.47151	0.35954	2.72869	15.2287	0	0.00604209
NC_006089.4	27279217	27279345	NC_006089.4.1-90000000.105475	0.4547	0.32114	3.23277	21.0321	0	0
NC_006089.4	27401168	27401338	NC_006089.4.1-90000000.106139	0.36611	0.26257	3.13992	22.7142	0	0
NC_006089.4	27401500	27401692	NC_006089.4.1-90000000.106143	0.36504	0.22734	4.34545	42.0009	0	0
NC_006089.4	27423485	27423594	NC_006089.4.1-90000000.106212	0.38166	0.27724	3.06343	13.8157	0	0.0138965
NC_006089.4	27457583	27457744	NC_006089.4.1-90000000.106341	0.32216	0.22029	3.51808	23.1257	0	0
NC_006089.4	27551992	27552465	NC_006089.4.1-90000000.106752	0.36798	0.3143	1.92447	17.3001	0	0.00257932
NC_006089.4	27559797	27559909	NC_006089.4.1-90000000.106793	0.45569	0.33307	3.0768	16.3244	0	0.00529183
NC_006089.4	27579405	27579754	NC_006089.4.1-90000000.106870	0.31636	0.25313	2.35253	20.525	0	0
NC_006089.4	27644249	27644376	NC_006089.4.1-90000000.107052	0.46164	0.33146	3.15932	19.5102	0	0
NC_006089.4	27679625	27679742	NC_006089.4.1-90000000.107162	0.53176	0.38257	3.14559	20.3686	0	0
NC_006089.4	27902252	27902361	NC_006089.4.1-90000000.107596	0.52865	0.40599	2.69683	13.3183	0	0.015854
NC_006089.4	27981915	27982029	NC_006089.4.1-90000000.107881	0.47583	0.35353	2.8625	14.799	0	0.00941222
NC_006089.4	28091292	28091419	NC_006089.4.1-90000000.108312	0.41382	0.30516	3.02563	15.6357	0	0.00529183
NC_006089.4	28130396	28130812	NC_006089.4.1-90000000.108476	0.29972	0.25595	1.88142	11.6038	0	0.037518
NC_006089.4	28132940	28133241	NC_006089.4.1-90000000.108488	0.27162	0.21783	2.28579	13.8963	0	0.0138965
NC_006089.4	28138724	28138857	NC_006089.4.1-90000000.108524	0.45912	0.34286	2.95205	16.066	0	0.00529183
NC_006089.4	28219639	28219980	NC_006089.4.1-90000000.109001	0.15287	0.11208	2.88243	15.7743	0	0.00529183
NC_006089.4	28250293	28250439	NC_006089.4.1-90000000.109178	0.29055	0.21741	2.74535	11.2736	0	0.0413202
NC_006089.4	28275705	28275938	NC_006089.4.1-90000000.109301	0.34657	0.26758	2.52201	17.5968	0	0.00137049
NC_006089.4	28303324	28303508	NC_006089.4.1-90000000.109428	0.44298	0.34369	2.51748	17.118	0	0.00257932
NC_006089.4	28318612	28318783	NC_006089.4.1-90000000.109513	0.40583	0.32678	2.28583	11.5343	0	0.037518
NC_006089.4	28339498	28339870	NC_006089.4.1-90000000.109610	0.26147	0.1955	2.75895	25.0887	0	0
NC_006089.4	28476479	28476630	NC_006089.4.1-90000000.110085	0.56276	0.4458	2.49564	16.5529	0	0.00529183
NC_006089.4	28715958	28716081	NC_006089.4.1-90000000.110922	0.51881	0.40672	2.58506	13.6163	0	0.015854
NC_006089.4	28763888	28764313	NC_006089.4.1-90000000.111134	0.42215	0.29766	3.38202	69.4588	0	0
NC_006089.4	29288216	29288325	NC_006089.4.1-90000000.112763	0.36007	0.27244	2.84246	11.0478	0	0.0484856
NC_006089.4	29288372	29288522	NC_006089.4.1-90000000.112765	0.41321	0.31517	2.7254	15.7534	0	0.00529183
NC_006089.4	29288539	29288657	NC_006089.4.1-90000000.112766	0.40569	0.30861	2.81929	13.2728	0	0.016492
NC_006089.4	29578295	29578425	NC_006089.4.1-90000000.114087	0.32097	0.23623	2.96975	13.2369	0	0.0169766
NC_006089.4	29627184	29627296	NC_006089.4.1-90000000.114363	0.47198	0.34244	3.10017	17.3938	0	0.00257932
NC_006089.4	29639329	29639506	NC_006089.4.1-90000000.114407	0.36454	0.25858	3.17264	22.7928	0	0
NC_006089.4	29660927	29661278	NC_006089.4.1-90000000.114504	0.2681	0.2212	2.143	13.9636	0	0.0138965
NC_006089.4	29679608	29679763	NC_006089.4.1-90000000.114571	0.50915	0.38497	2.78762	21.1366	0	0
NC_006089.4	29734605	29734887	NC_006089.4.1-90000000.114830	0.42153	0.3359	2.40203	21.4581	0	0
NC_006089.4	29746456	29746575	NC_006089.4.1-90000000.114884	0.43733	0.34419	2.47207	11.1542	0	0.0438115
NC_006089.4	29774504	29774634	NC_006089.4.1-90000000.115034	0.39482	0.29608	2.81324	14.8286	0	0.00758223
NC_006089.4	29783097	29783374	NC_006089.4.1-90000000.115077	0.36332	0.26868	3.11927	32.3611	0	0
NC_006089.4	29798602	29798775	NC_006089.4.1-90000000.115173	0.5029	0.40569	2.29517	14.4757	0	0.0120389
NC_006089.4	29881887	29882064	NC_006089.4.1-90000000.115520	0.40432	0.30186	2.89621	19.8102	0	0
NC_006089.4	30083283	30083416	NC_006089.4.1-90000000.116226	0.52602	0.39719	2.78627	17.9263	0	0.00137049
NC_006089.4	30114095	30114585	NC_006089.4.1-90000000.116362	0.25711	0.21981	1.92717	12.0754	0	0.029537
NC_006089.4	30278696	30278955	NC_006089.4.1-90000000.116894	0.43348	0.30824	3.28797	42.7442	0	0
NC_006089.4	30304684	30305665	NC_006089.4.1-90000000.116977	0.14147	0.11811	2.07097	18.5411	0	0
NC_006089.4	30323527	30323689	NC_006089.4.1-90000000.117034	0.39993	0.24684	4.54549	40.4253	0	0
NC_006089.4	30422667	30422819	NC_006089.4.1-90000000.117445	0.37571	0.28206	2.81445	15.9496	0	0.00529183
NC_006089.4	31355296	31355505	NC_006089.4.1-90000000.120423	0.41792	0.34143	2.26105	13.8395	0	0.0138965
NC_006089.4	32318056	32318484	NC_006089.4.1-90000000.124639	0.17511	0.14325	2.20789	11.9802	0	0.0302964
NC_006089.4	32452427	32452813	NC_006089.4.1-90000000.125485	0.29092	0.21303	3.04215	36.7691	0	0
NC_006089.4	32476613	32476757	NC_006089.4.1-90000000.125625	0.56471	0.4546	2.3217	13.4212	0	0.015854
NC_006089.4	32567612	32568175	NC_006089.4.1-90000000.126078	0.29682	0.25734	1.82189	14.2818	0	0.0120389
NC_006089.4	32675581	32675712	NC_006089.4.1-90000000.126710	0.24207	0.17486	3.1172	11.1796	0	0.0434679
NC_006089.4	32675931	32676042	NC_006089.4.1-90000000.126712	0.51645	0.35684	3.52628	15.091	0	0.00667579
NC_006089.4	32885059	32885233	NC_006089.4.1-90000000.127941	0.35012	0.25678	2.98559	19.484	0	0
NC_006089.4	32892696	32892983	NC_006089.4.1-90000000.127995	0.4086	0.33643	2.16122	16.8264	0	0.00374665
NC_006089.4	32980822	32980953	NC_006089.4.1-90000000.128417	0.36362	0.26975	2.94218	13.4168	0	0.015854
NC_006089.4	33032095	33032218	NC_006089.4.1-90000000.128559	0.45782	0.35087	2.65159	13.6355	0	0.015854
NC_006089.4	33297274	33297396	NC_006089.4.1-90000000.129820	0.42496	0.30122	3.21697	18.5106	0	0
NC_006089.4	33351169	33351320	NC_006089.4.1-90000000.130155	0.48955	0.36279	2.88642	14.347	0	0.0120389
NC_006089.4	33382484	33382585	NC_006089.4.1-90000000.130338	0.52732	0.40924	2.76146	13.0208	0	0.0193234
NC_006089.4	33412479	33412635	NC_006089.4.1-90000000.130548	0.40313	0.28756	3.39773	24.3084	0	0
NC_006089.4	33443668	33443839	NC_006089.4.1-90000000.130724	0.32115	0.25531	2.42736	11.5501	0	0.037518
NC_006089.4	33468260	33468469	NC_006089.4.1-90000000.130911	0.34099	0.2728	2.38777	13.32	0	0.015854
NC_006089.4	33511395	33511595	NC_006089.4.1-90000000.131248	0.27139	0.21512	2.41757	11.1943	0	0.0430531
NC_006089.4	34722039	34722145	NC_006089.4.1-90000000.136547	0.44577	0.32868	2.98289	15.1138	0	0.00667579
NC_006089.4	34988110	34988450	NC_006089.4.1-90000000.137628	0.25325	0.21015	2.10753	11.8205	0	0.0325817
NC_006089.4	35064347	35064493	NC_006089.4.1-90000000.137915	0.38396	0.28832	2.67223	13.5268	0	0.015854
NC_006089.4	35131349	35131457	NC_006089.4.1-90000000.138326	0.3965	0.30271	2.7424	11.1434	0	0.0443492
NC_006089.4	35131635	35131968	NC_006089.4.1-90000000.138328	0.16267	0.10302	4.14746	32.2892	0	0
NC_006089.4	35134930	35135046	NC_006089.4.1-90000000.138347	0.35267	0.23054	3.92078	21.0819	0	0
NC_006089.4	35206354	35206825	NC_006089.4.1-90000000.138709	0.19773	0.1589	2.31675	16.9707	0	0.00374665
NC_006089.4	35416952	35417350	NC_006089.4.1-90000000.139939	0.27879	0.23699	1.95443	12.022	0	0.0298894
NC_006089.4	35463607	35463753	NC_006089.4.1-90000000.140141	0.5604	0.40869	2.98915	11.6206	0	0.037518
NC_006089.4	35466479	35466705	NC_006089.4.1-90000000.140149	0.40553	0.32617	2.34083	15.3648	0	0.00604209
NC_006089.4	35497969	35498123	NC_006089.4.1-90000000.140250	0.36999	0.28532	2.61437	13.1328	0	0.0176987
NC_006089.4	36127703	36127916	NC_006089.4.1-90000000.141480	0.34986	0.26535	2.82655	20.617	0	0
NC_006089.4	36384381	36384582	NC_006089.4.1-90000000.142234	0.36989	0.30152	2.21167	11.3445	0	0.0401207
NC_006089.4	36400757	36401066	NC_006089.4.1-90000000.142318	0.1735	0.13219	2.6843	14.2782	0	0.0120389
NC_006089.4	36418902	36419094	NC_006089.4.1-90000000.142407	0.41905	0.32775	2.50955	16.6876	0	0.00529183
NC_006089.4	37425078	37425179	NC_006089.4.1-90000000.146307	0.43988	0.2824	4.07468	22.9352	0	0
NC_006089.4	37897306	37897866	NC_006089.4.1-90000000.148830	0.14565	0.11098	2.69155	21.4177	0	0
NC_006089.4	38014530	38014896	NC_006089.4.1-90000000.149399	0.34379	0.16988	6.84125	137.34	0	0
NC_006089.4	38527895	38528070	NC_006089.4.1-90000000.150972	0.51632	0.38417	2.75083	23.4554	0	0
NC_006089.4	38529975	38530082	NC_006089.4.1-90000000.150976	0.26832	0.18337	3.33963	11.5407	0	0.037518
NC_006089.4	38564424	38564599	NC_006089.4.1-90000000.151057	0.40324	0.31487	2.36299	12.4014	0	0.0263269
NC_006089.4	38691364	38691468	NC_006089.4.1-90000000.151483	0.27912	0.19734	3.3044	11.7843	0	0.0334751
NC_006089.4	38740316	38740429	NC_006089.4.1-90000000.151643	0.43378	0.31857	2.93466	14.2407	0	0.0120389
NC_006089.4	38865656	38865759	NC_006089.4.1-90000000.152244	0.47861	0.3665	2.74344	12.6356	0	0.0233309
NC_006089.4	39058834	39059095	NC_006089.4.1-90000000.152823	0.41037	0.34657	1.99574	11.7627	0	0.0334751
NC_006089.4	39127862	39128032	NC_006089.4.1-90000000.153274	0.4388	0.32744	2.82883	20.3879	0	0
NC_006089.4	39270603	39270785	NC_006089.4.1-90000000.154031	0.51946	0.42415	2.1322	12.7939	0	0.0217041
NC_006089.4	39435895	39436029	NC_006089.4.1-90000000.154975	0.46399	0.34289	2.94062	15.3764	0	0.00604209
NC_006089.4	39477361	39477478	NC_006089.4.1-90000000.155210	0.22738	0.15704	3.44127	11.5324	0	0.037518
NC_006089.4	40245499	40245639	NC_006089.4.1-90000000.158967	0.30283	0.21518	3.22006	16.2045	0	0.00529183
NC_006089.4	42007347	42007463	NC_006089.4.1-90000000.165434	0.51838	0.3757	3.10247	20.0922	0	0
NC_006089.4	42650848	42650961	NC_006089.4.1-90000000.167538	0.44436	0.32637	2.96412	15.579	0	0.00529183
NC_006089.4	43667530	43667725	NC_006089.4.1-90000000.171971	0.51033	0.41222	2.19913	14.2265	0	0.0120389
NC_006089.4	44100548	44100777	NC_006089.4.1-90000000.173142	0.38874	0.31435	2.19209	13.6159	0	0.015854
NC_006089.4	44100782	44100918	NC_006089.4.1-90000000.173143	0.48486	0.37364	2.49434	13.8773	0	0.0138965
NC_006089.4	44679055	44679165	NC_006089.4.1-90000000.174927	0.52953	0.40777	2.69279	12.2126	0	0.0268987
NC_006089.4	45150480	45150749	NC_006089.4.1-90000000.176336	0.44135	0.37596	2.04535	12.8569	0	0.0204559
NC_006089.4	45278760	45278883	NC_006089.4.1-90000000.176836	0.38304	0.2832	2.7991	12.9453	0	0.0193234
NC_006089.4	45387962	45388169	NC_006089.4.1-90000000.177163	0.45314	0.37174	2.12938	12.5052	0	0.025365
NC_006089.4	45744178	45744292	NC_006089.4.1-90000000.178674	0.53552	0.39138	2.93291	17.6237	0	0.00137049
NC_006089.4	45852889	45853021	NC_006089.4.1-90000000.178922	0.35184	0.23972	3.45802	19.0366	0	0
NC_006089.4	47420107	47420243	NC_006089.4.1-90000000.184235	0.32641	0.23807	3.03251	14.9692	0	0.00667579
NC_006089.4	47721987	47722197	NC_006089.4.1-90000000.185316	0.30259	0.23399	2.58617	15.144	0	0.00667579
NC_006089.4	47730057	47730179	NC_006089.4.1-90000000.185374	0.42824	0.30592	3.17692	18.6381	0	0
NC_006089.4	47748294	47748632	NC_006089.4.1-90000000.185477	0.27979	0.23413	2.06123	12.3087	0	0.0268987
NC_006089.4	48332606	48332751	NC_006089.4.1-90000000.187612	0.34592	0.28061	3.15299	11.2097	0	0.0430531
NC_006089.4	48356118	48356270	NC_006089.4.1-90000000.187677	0.44007	0.32529	3.27515	20.2158	0	0
NC_006089.4	48422963	48423146	NC_006089.4.1-90000000.187846	0.43074	0.34098	2.69866	16.9809	0	0.00374665
NC_006089.4	48461837	48461989	NC_006089.4.1-90000000.187969	0.36342	0.25328	3.71355	24.7623	0	0
NC_006089.4	48467058	48467172	NC_006089.4.1-90000000.187996	0.57165	0.43467	2.76231	16.4043	0	0.00529183
NC_006089.4	48469041	48469202	NC_006089.4.1-90000000.188019	0.34541	0.25909	2.87745	16.9687	0	0.00374665
NC_006089.4	48509187	48509289	NC_006089.4.1-90000000.188181	0.34875	0.2356	3.63434	16.7967	0	0.00374665
NC_006089.4	48621653	48621777	NC_006089.4.1-90000000.188510	0.54064	0.42961	2.45451	12.2483	0	0.0268987
NC_006089.4	48633700	48633933	NC_006089.4.1-90000000.188564	0.38522	0.31525	2.29298	13.9143	0	0.0138965
NC_006089.4	48634431	48634566	NC_006089.4.1-90000000.188571	0.46225	0.35919	2.64265	13.7365	0	0.0152815
NC_006089.4	48634816	48635002	NC_006089.4.1-90000000.188575	0.42697	0.30943	3.31361	26.5057	0	0
NC_006089.4	48657055	48657158	NC_006089.4.1-90000000.188641	0.46387	0.35904	2.78158	12.0672	0	0.029537
NC_006089.4	48683412	48683627	NC_006089.4.1-90000000.188722	0.46392	0.37816	2.35595	16.9844	0	0.00374665
NC_006089.4	48686666	48686842	NC_006089.4.1-90000000.188736	0.29514	0.23098	2.83925	12.4743	0	0.025365
NC_006089.4	48711390	48711543	NC_006089.4.1-90000000.188832	0.22075	0.12464	5.42081	28.4954	0	0
NC_006089.4	48713849	48714055	NC_006089.4.1-90000000.188841	0.33356	0.25316	2.75304	18.6075	0	0
NC_006089.4	48714568	48715501	NC_006089.4.1-90000000.188850	0.15915	0.12241	2.62659	36.6144	0	0
NC_006089.4	48725719	48725821	NC_006089.4.1-90000000.188889	0.40306	0.2777	3.79951	15.6391	0	0.00529183
NC_006089.4	48730653	48730916	NC_006089.4.1-90000000.188916	0.45752	0.31923	3.65833	50.1241	0	0
NC_006089.4	48748503	48748603	NC_006089.4.1-90000000.188979	0.28617	0.10561	10.2741	42.6655	0	0
NC_006089.4	48748605	48748829	NC_006089.4.1-90000000.188980	0.28601	0.20741	3.64223	24.4905	0	0
NC_006089.4	48749785	48749903	NC_006089.4.1-90000000.188984	0.55383	0.43993	2.56951	13.3423	0	0.015854
NC_006089.4	48755381	48755544	NC_006089.4.1-90000000.189007	0.41595	0.3122	2.88071	19.0767	0	0
NC_006089.4	48764827	48765193	NC_006089.4.1-90000000.189043	0.29653	0.24582	2.14196	14.244	0	0.0120389
NC_006089.4	48767269	48767636	NC_006089.4.1-90000000.189048	0.31882	0.23214	3.05247	37.7923	0	0
NC_006089.4	48767656	48767942	NC_006089.4.1-90000000.189050	0.31041	0.22946	2.93407	27.4549	0	0
NC_006089.4	48773129	48773655	NC_006089.4.1-90000000.189060	0.23092	0.13336	5.15333	94.0746	0	0
NC_006089.4	48773660	48773760	NC_006089.4.1-90000000.189061	0.39441	0.29287	3.00166	12.3125	0	0.0268987
NC_006089.4	48781403	48781606	NC_006089.4.1-90000000.189103	0.39736	0.3055	2.63723	19.5623	0	0
NC_006089.4	48791763	48792005	NC_006089.4.1-90000000.189143	0.2634	0.18415	3.37514	25.9787	0	0
NC_006089.4	48798704	48798906	NC_006089.4.1-90000000.189171	0.22925	0.16878	2.97278	13.903	0	0.0138965
NC_006089.4	48799085	48799303	NC_006089.4.1-90000000.189173	0.42997	0.31712	2.94605	27.9263	0	0
NC_006089.4	48817683	48818301	NC_006089.4.1-90000000.189285	0.12794	0.09764	2.68273	21.0646	0	0
NC_006089.4	48818581	48818760	NC_006089.4.1-90000000.189290	0.34746	0.26337	2.7439	16.3198	0	0.00529183
NC_006089.4	48822201	48822312	NC_006089.4.1-90000000.189307	0.56001	0.4338	2.87627	15.2802	0	0.00604209
NC_006089.4	48828657	48828954	NC_006089.4.1-90000000.189326	0.33884	0.27443	2.27816	16.6039	0	0.00529183
NC_006089.4	48836436	48836539	NC_006089.4.1-90000000.189366	0.34261	0.25984	3.15148	11.2193	0	0.0421582
NC_006089.4	48836544	48836681	NC_006089.4.1-90000000.189367	0.35338	0.22513	4.21961	27.9582	0	0
NC_006089.4	48850957	48851148	NC_006089.4.1-90000000.189440	0.23815	0.14118	4.81411	33.5505	0	0
NC_006089.4	48851559	48851733	NC_006089.4.1-90000000.189445	0.43044	0.31925	2.99625	22.8847	0	0
NC_006089.4	48859031	48859213	NC_006089.4.1-90000000.189471	0.22029	0.14972	3.57813	18.9648	0	0
NC_006089.4	48861407	48861544	NC_006089.4.1-90000000.189475	0.30552	0.18515	5.46201	32.564	0	0
NC_006089.4	48861650	48861760	NC_006089.4.1-90000000.189478	0.4021	0.29541	3.44432	15.7883	0	0.00529183
NC_006089.4	48869506	48869716	NC_006089.4.1-90000000.189507	0.45055	0.34799	2.59012	21.8679	0	0
NC_006089.4	48881333	48881629	NC_006089.4.1-90000000.189547	0.35639	0.30137	2.2449	14.0521	0	0.0127202
NC_006089.4	49007333	49007509	NC_006089.4.1-90000000.190045	0.3692	0.27628	3.24849	21.117	0	0
NC_006089.4	49019155	49019397	NC_006089.4.1-90000000.190097	0.32306	0.24085	2.88171	22.3423	0	0
NC_006089.4	49023587	49023794	NC_006089.4.1-90000000.190110	0.47265	0.37631	2.52654	20.4408	0	0
NC_006089.4	49510157	49510764	NC_006089.4.1-90000000.191495	0.16762	0.11807	3.1874	36.8109	0	0
NC_006089.4	49515424	49515585	NC_006089.4.1-90000000.191507	0.22225	0.15094	3.46845	15.3132	0	0.00604209
NC_006089.4	49523185	49523391	NC_006089.4.1-90000000.191539	0.4228	0.30365	3.06606	27.2652	0	0
NC_006089.4	49563860	49564342	NC_006089.4.1-90000000.191689	0.33324	0.26438	2.37939	29.2858	0	0
NC_006089.4	49667148	49667294	NC_006089.4.1-90000000.192136	0.53957	0.41368	2.56023	17.209	0	0.00257932
NC_006089.4	49676676	49676983	NC_006089.4.1-90000000.192162	0.19448	0.15196	2.47614	12.4303	0	0.0259477
NC_006089.4	49680158	49680314	NC_006089.4.1-90000000.192188	0.34125	0.2307	3.49852	22.9636	0	0
NC_006089.4	49703735	49704122	NC_006089.4.1-90000000.192256	0.28746	0.22101	2.57284	25.0693	0	0
NC_006089.4	49705288	49705433	NC_006089.4.1-90000000.192271	0.25441	0.18643	2.93207	11.6577	0	0.035391
NC_006089.4	49706210	49706650	NC_006089.4.1-90000000.192274	0.27506	0.22573	2.1536	17.3566	0	0.00257932
NC_006089.4	49723487	49724173	NC_006089.4.1-90000000.192371	0.26005	0.20378	2.44814	36.0995	0	0
NC_006089.4	49761201	49761378	NC_006089.4.1-90000000.192508	0.32599	0.25729	2.40439	11.1834	0	0.0434679
NC_006089.4	49776460	49776613	NC_006089.4.1-90000000.192571	0.36491	0.25327	3.40621	21.152	0	0
NC_006089.4	49776670	49776898	NC_006089.4.1-90000000.192574	0.40781	0.32629	2.2703	14.6334	0	0.00998135
NC_006089.4	49781381	49781694	NC_006089.4.1-90000000.192603	0.14437	0.09428	4.08152	24.0285	0	0
NC_006089.4	49790397	49790689	NC_006089.4.1-90000000.192645	0.26599	0.20192	2.66516	19.225	0	0
NC_006089.4	49790768	49790994	NC_006089.4.1-90000000.192647	0.35237	0.27767	2.38515	14.7934	0	0.00941222
NC_006089.4	49814137	49814780	NC_006089.4.1-90000000.192747	0.13915	0.111	2.31109	16.2549	0	0.00529183
NC_006089.4	49818963	49819174	NC_006089.4.1-90000000.192765	0.35744	0.28718	2.26699	12.4238	0	0.0259477
NC_006089.4	49827025	49827436	NC_006089.4.1-90000000.192797	0.31673	0.27198	1.85819	11.3291	0	0.0406108
NC_006089.4	49829549	49829743	NC_006089.4.1-90000000.192810	0.30111	0.23468	2.50559	12.5784	0	0.0250665
NC_006089.4	50247590	50247774	NC_006089.4.1-90000000.194009	0.4706	0.3844	2.18608	12.2081	0	0.0268987
NC_006089.4	50344545	50344700	NC_006089.4.1-90000000.194406	0.42022	0.32833	2.45597	13.3707	0	0.015854
NC_006089.4	50359365	50359467	NC_006089.4.1-90000000.194434	0.37456	0.2667	3.16134	13.2903	0	0.016492
NC_006089.4	50360996	50361280	NC_006089.4.1-90000000.194443	0.33213	0.26403	2.33836	16.9619	0	0.00374665
NC_006089.4	50365005	50365128	NC_006089.4.1-90000000.194462	0.41211	0.30472	2.85275	13.9282	0	0.0138965
NC_006089.4	50365247	50365353	NC_006089.4.1-90000000.194465	0.47018	0.32117	3.49052	20.4624	0	0
NC_006089.4	50405774	50405940	NC_006089.4.1-90000000.194627	0.46324	0.35985	2.51332	16.8408	0	0.00374665
NC_006089.4	50425782	50425924	NC_006089.4.1-90000000.194679	0.28165	0.19459	3.35555	15.8107	0	0.00529183
NC_006089.4	50430397	50430664	NC_006089.4.1-90000000.194708	0.31739	0.22215	3.25761	30.7443	0	0
NC_006089.4	50431572	50431818	NC_006089.4.1-90000000.194712	0.31558	0.24887	2.32729	13.3244	0	0.015854
NC_006089.4	50449915	50450262	NC_006089.4.1-90000000.194782	0.40419	0.33409	2.12675	17.7712	0	0.00137049
NC_006089.4	50455406	50455715	NC_006089.4.1-90000000.194803	0.20254	0.15973	2.40064	12.269	0	0.0268987
NC_006089.4	50521079	50521275	NC_006089.4.1-90000000.195128	0.24053	0.14793	4.30877	28.2669	0	0
NC_006089.4	50569519	50569648	NC_006089.4.1-90000000.195347	0.4143	0.31587	2.61811	11.9141	0	0.031249
NC_006089.4	50575363	50575588	NC_006089.4.1-90000000.195379	0.30786	0.22146	3.10964	22.5401	0	0
NC_006089.4	50670647	50670837	NC_006089.4.1-90000000.195717	0.21027	0.14808	3.11679	13.8661	0	0.0138965
NC_006089.4	50699876	50700165	NC_006089.4.1-90000000.195852	0.3566	0.29031	2.16122	14.4767	0	0.0120389
NC_006089.4	50729064	50729465	NC_006089.4.1-90000000.196010	0.3119	0.24472	2.46132	24.8312	0	0
NC_006089.4	50736084	50736325	NC_006089.4.1-90000000.196040	0.33211	0.23245	3.28982	29.7884	0	0
NC_006089.4	50977318	50977522	NC_006089.4.1-90000000.197362	0.39331	0.3233	2.13134	11.2338	0	0.0421582
NC_006089.4	51169243	51169378	NC_006089.4.1-90000000.198292	0.42323	0.31629	2.77266	14.5303	0	0.00998135
NC_006089.4	53217501	53217740	NC_006089.4.1-90000000.203193	0.39109	0.32744	2.06506	11.8722	0	0.031507
NC_006089.4	55099596	55099864	NC_006089.4.1-90000000.205362	0.38062	0.28455	2.69414	23.3948	0	0
NC_006089.4	56774642	56774790	NC_006089.4.1-90000000.208152	0.47387	0.3767	2.31559	11.9007	0	0.031507
NC_006089.4	56816860	56816982	NC_006089.4.1-90000000.208362	0.42902	0.32068	2.73376	13.3143	0	0.015854
NC_006089.4	57154286	57154405	NC_006089.4.1-90000000.209249	0.4465	0.30707	3.32561	20.0681	0	0
NC_006089.4	58642166	58642452	NC_006089.4.1-90000000.213282	0.2498	0.20426	2.21169	11.4825	0	0.0380056
NC_006089.4	58670392	58670580	NC_006089.4.1-90000000.213395	0.37626	0.30576	2.23581	11.429	0	0.038365
NC_006089.4	58993343	58993501	NC_006089.4.1-90000000.214698	0.36334	0.27525	2.76789	15.3075	0	0.00604209
NC_006089.4	59907849	59907958	NC_006089.4.1-90000000.217582	0.40818	0.30506	2.89248	13.08	0	0.0189173
NC_006089.4	60555038	60555186	NC_006089.4.1-90000000.220548	0.4025	0.25793	4.09028	32.6606	0	0
NC_006089.4	60562915	60563352	NC_006089.4.1-90000000.220576	0.13549	0.10483	2.58975	14.7636	0	0.00998135
NC_006089.4	60736260	60736553	NC_006089.4.1-90000000.221170	0.3732	0.26666	3.2504	40.4236	0	0
NC_006089.4	61262452	61262603	NC_006089.4.1-90000000.224010	0.30889	0.22097	3.1795	17.3651	0	0.00257932
NC_006089.4	61273052	61273160	NC_006089.4.1-90000000.224065	0.4398	0.31889	3.09287	15.5041	0	0.00604209
NC_006089.4	61393851	61394014	NC_006089.4.1-90000000.224738	0.39211	0.31398	2.33179	11.4182	0	0.0391986
NC_006089.4	62104586	62104726	NC_006089.4.1-90000000.228450	0.42933	0.33914	2.46476	12.3212	0	0.0268336
NC_006089.4	63560196	63560300	NC_006089.4.1-90000000.234621	0.32351	0.16989	6.0294	30.9958	0	0
NC_006089.4	63818842	63818973	NC_006089.4.1-90000000.235716	0.31246	0.22747	3.06459	13.5576	0	0.015854
NC_006089.4	64080648	64081040	NC_006089.4.1-90000000.236968	0.26645	0.21719	2.22335	16.8396	0	0.00374665
NC_006089.4	64096506	64096688	NC_006089.4.1-90000000.237059	0.4721	0.35154	2.90487	24.9852	0	0
NC_006089.4	64137292	64137808	NC_006089.4.1-90000000.237228	0.29859	0.24752	2.11187	21.2004	0	0
NC_006089.4	64148091	64148400	NC_006089.4.1-90000000.237293	0.23954	0.1925	2.33297	12.8418	0	0.0204559
NC_006089.4	64184286	64184398	NC_006089.4.1-90000000.237441	0.59138	0.42643	3.03055	20.9365	0	0
NC_006089.4	64203969	64204132	NC_006089.4.1-90000000.237528	0.48492	0.39149	2.32579	13.7395	0	0.0152815
NC_006089.4	64432266	64432535	NC_006089.4.1-90000000.238298	0.33402	0.26335	2.45242	18.1689	0	0
NC_006089.4	64445720	64446093	NC_006089.4.1-90000000.238368	0.19551	0.15904	2.2362	12.1601	0	0.0280475
NC_006089.4	64997080	64997263	NC_006089.4.1-90000000.241147	0.56138	0.42319	2.57558	21.2385	0	0
NC_006089.4	65065072	65065207	NC_006089.4.1-90000000.241635	0.23387	0.16637	3.19937	12.2573	0	0.0268987
NC_006089.4	65389460	65389678	NC_006089.4.1-90000000.243227	0.40636	0.31414	2.58839	20.3062	0	0
NC_006089.4	65524003	65524104	NC_006089.4.1-90000000.243854	0.35086	0.25734	2.99845	11.17	0	0.0438115
NC_006089.4	65972669	65972806	NC_006089.4.1-90000000.245149	0.59739	0.46967	2.50688	16.8321	0	0.00374665
NC_006089.4	65989087	65989224	NC_006089.4.1-90000000.245231	0.33047	0.23572	3.18591	16.2969	0	0.00529183
NC_006089.4	66039534	66039656	NC_006089.4.1-90000000.245467	0.35517	0.26731	2.79725	11.7771	0	0.0334751
NC_006089.4	66870142	66870293	NC_006089.4.1-90000000.248589	0.36574	0.2784	2.73536	14.4487	0	0.0120389
NC_006089.4	66938690	66938801	NC_006089.4.1-90000000.248876	0.43055	0.28791	3.49077	18.7138	0	0
NC_006089.4	67315620	67315763	NC_006089.4.1-90000000.250824	0.46242	0.37169	2.34681	11.8224	0	0.0320494
NC_006089.4	67362192	67362422	NC_006089.4.1-90000000.251127	0.35923	0.27347	2.69386	20.887	0	0
NC_006089.4	67721469	67721749	NC_006089.4.1-90000000.252839	0.2241	0.17501	2.55622	14.4903	0	0.0117396
NC_006089.4	68352290	68352408	NC_006089.4.1-90000000.255777	0.47289	0.34862	2.83599	14.3519	0	0.0120389
NC_006089.4	68820937	68821087	NC_006089.4.1-90000000.257556	0.52111	0.42343	2.24592	12.4661	0	0.025365
NC_006089.4	68821091	68821193	NC_006089.4.1-90000000.257557	0.35526	0.23978	3.651	16.8997	0	0.00374665
NC_006089.4	68841419	68841608	NC_006089.4.1-90000000.257622	0.46501	0.36232	2.56309	19.301	0	0
NC_006089.4	69617599	69617703	NC_006089.4.1-90000000.260419	0.5356	0.40936	2.60548	12.551	0	0.0250665
NC_006089.4	69740428	69740577	NC_006089.4.1-90000000.261032	0.3551	0.26066	2.97654	16.7121	0	0.00529183
NC_006089.4	69740580	69740817	NC_006089.4.1-90000000.261033	0.37882	0.31664	2.06298	11.1689	0	0.0438115
NC_006089.4	69747661	69747799	NC_006089.4.1-90000000.261047	0.48118	0.35565	2.98997	20.4951	0	0
NC_006089.4	69803641	69803856	NC_006089.4.1-90000000.261258	0.36077	0.26983	2.83688	22.1903	0	0
NC_006089.4	69878382	69878542	NC_006089.4.1-90000000.261519	0.47449	0.35614	2.74283	19.4588	0	0
NC_006089.4	70038222	70038471	NC_006089.4.1-90000000.261949	0.40446	0.2957	3.04989	33.7941	0	0
NC_006089.4	72768698	72768839	NC_006089.4.1-90000000.266599	0.4511	0.33719	2.75103	15.9297	0	0.00529183
NC_006089.4	73142393	73142523	NC_006089.4.1-90000000.267145	0.34109	0.20765	4.38411	25.6682	0	0
NC_006089.4	75505030	75505169	NC_006089.4.1-90000000.270206	0.39612	0.29416	2.88621	16.8513	0	0.00374665
NC_006089.4	75616277	75616416	NC_006089.4.1-90000000.270588	0.4856	0.364	3.04376	20.0865	0	0
NC_006089.4	76185577	76185870	NC_006089.4.1-90000000.272556	0.25526	0.2088	2.20664	12.1249	0	0.0291028
NC_006089.4	76242298	76242458	NC_006089.4.1-90000000.272703	0.5114	0.42368	2.22071	11.9804	0	0.0302964
NC_006089.4	77156959	77157068	NC_006089.4.1-90000000.275262	0.45914	0.34638	2.65899	11.7428	0	0.0339651
NC_006089.4	77298307	77298495	NC_006089.4.1-90000000.275408	0.49432	0.36353	2.99669	29.3694	0	0
NC_006089.4	77435882	77435996	NC_006089.4.1-90000000.275559	0.48768	0.37061	2.6701	13.4875	0	0.015854
NC_006089.4	78168661	78168770	NC_006089.4.1-90000000.277166	0.34645	0.24342	3.29071	14.4505	0	0.0120389
NC_006089.4	78177993	78178155	NC_006089.4.1-90000000.277188	0.3565	0.24775	3.4083	24.4055	0	0
NC_006089.4	79520695	79520850	NC_006089.4.1-90000000.280555	0.32562	0.24073	2.9081	16.1214	0	0.00529183
NC_006089.4	79533330	79533599	NC_006089.4.1-90000000.280589	0.24629	0.19582	2.46587	13.4422	0	0.015854
NC_006089.4	79950732	79951011	NC_006089.4.1-90000000.281453	0.162	0.12122	2.82531	12.9039	0	0.0198822
NC_006089.4	79977429	79977679	NC_006089.4.1-90000000.281499	0.20615	0.14671	3.18001	18.9528	0	0
NC_006089.4	80358090	80358254	NC_006089.4.1-90000000.282396	0.53999	0.42622	2.35122	15.4605	0	0.00604209
NC_006089.4	80579130	80579672	NC_006089.4.1-90000000.282924	0.22653	0.19404	1.9032	12.4052	0	0.0263269
NC_006089.4	81266806	81266915	NC_006089.4.1-90000000.285269	0.37048	0.25149	3.64363	18.1416	0	0
NC_006089.4	81643049	81643236	NC_006089.4.1-90000000.286674	0.45514	0.35006	2.57504	17.8119	0	0.00137049
NC_006089.4	82260315	82260455	NC_006089.4.1-90000000.287530	0.51365	0.33162	3.6582	28.3844	0	0
NC_006089.4	83183841	83183957	NC_006089.4.1-90000000.288911	0.4953	0.34061	3.36046	19.7711	0	0
NC_006089.4	83747328	83747522	NC_006089.4.1-90000000.290715	0.43287	0.32622	3.14897	25.4409	0	0
NC_006089.4	85309308	85309462	NC_006089.4.1-90000000.296090	0.4994	0.36718	2.84795	20.4807	0	0
NC_006089.4	85369788	85369944	NC_006089.4.1-90000000.296329	0.47442	0.36094	2.71435	19.314	0	0
NC_006089.4	86700568	86700908	NC_006089.4.1-90000000.300310	0.21007	0.16443	2.50559	16.0672	0	0.00529183
NC_006089.4	86848038	86848256	NC_006089.4.1-90000000.300713	0.54816	0.42497	2.60502	27.038	0	0
NC_006089.4	86868757	86868910	NC_006089.4.1-90000000.300782	0.44247	0.30555	3.53276	28.6867	0	0
NC_006089.4	87162955	87163163	NC_006089.4.1-90000000.301749	0.33026	0.24438	2.94208	20.9144	0	0
NC_006089.4	87699524	87699629	NC_006089.4.1-90000000.303382	0.48746	0.33405	3.52337	21.8455	0	0
NC_006089.4	87742896	87743016	NC_006089.4.1-90000000.303512	0.38134	0.2653	3.38172	18.3282	0	0
NC_006089.4	87924218	87924637	NC_006089.4.1-90000000.304150	0.36123	0.28469	2.49497	32.2465	0	0
NC_006089.4	87924641	87924764	NC_006089.4.1-90000000.304151	0.47059	0.35102	2.86305	16.9185	0	0.00374665
NC_006089.4	88592793	88592973	NC_006089.4.1-90000000.306238	0.4693	0.37241	2.50117	16.867	0	0.00374665
NC_006089.4	88953583	88953742	NC_006089.4.1-90000000.307481	0.53301	0.413	2.60513	18.9972	0	0
NC_006089.4	89746978	89747098	NC_006089.4.1-90000000.310314	0.32838	0.23979	2.98155	12.5936	0	0.0250665
NC_006089.4	89830291	89830467	NC_006089.4.1-90000000.310615	0.45058	0.36381	2.44698	15.0233	0	0.00667579
NC_006089.4	89894705	89895070	NC_006089.4.1-90000000.310837	0.28632	0.2417	2.02193	12.64	0	0.0233309
NC_006089.4	90930152	90930280	NC_006089.4.90000001-149560735.2999	0.38122	0.28089	2.94957	14.6021	0	0.00998135
NC_006089.4	91047941	91048116	NC_006089.4.90000001-149560735.3504	0.41397	0.32443	3.13072	20.3296	0	0
NC_006089.4	91241566	91241693	NC_006089.4.90000001-149560735.4683	0.41044	0.31392	2.66244	12.9494	0	0.0193234
NC_006089.4	91262966	91263349	NC_006089.4.90000001-149560735.4809	0.21466	0.17232	2.32696	15.1686	0	0.00667579
NC_006089.4	91388169	91388284	NC_006089.4.90000001-149560735.5470	0.4326	0.34268	2.73784	11.3854	0	0.0391986
NC_006089.4	91482994	91483100	NC_006089.4.90000001-149560735.5979	0.46487	0.34338	2.94295	14.9606	0	0.00667579
NC_006089.4	91605694	91605812	NC_006089.4.90000001-149560735.6685	0.49039	0.37698	2.63762	14.0424	0	0.0127202
NC_006089.4	91790041	91790151	NC_006089.4.90000001-149560735.7798	0.45814	0.32458	3.0921	15.5707	0	0.00529183
NC_006089.4	91811315	91811431	NC_006089.4.90000001-149560735.7943	0.44498	0.3512	2.50427	11.0555	0	0.0480737
NC_006089.4	93035626	93035784	NC_006089.4.90000001-149560735.11221	0.41227	0.30486	2.92984	19.884	0	0
NC_006089.4	94782354	94782530	NC_006089.4.90000001-149560735.14415	0.45773	0.36089	2.45067	16.1971	0	0.00529183
NC_006089.4	95769829	95769935	NC_006089.4.90000001-149560735.16133	0.57028	0.43695	2.69094	14.3035	0	0.0120389
NC_006089.4	96023767	96023915	NC_006089.4.90000001-149560735.16843	0.36519	0.28654	2.46539	11.2979	0	0.0409955
NC_006089.4	96591031	96591150	NC_006089.4.90000001-149560735.18436	0.54855	0.42313	2.60619	15.1759	0	0.00667579
NC_006089.4	96767635	96767797	NC_006089.4.90000001-149560735.18648	0.49996	0.40429	2.28053	13.485	0	0.015854
NC_006089.4	96901936	96902041	NC_006089.4.90000001-149560735.19220	0.34942	0.2444	3.345	14.88	0	0.00667579
NC_006089.4	96945866	96946132	NC_006089.4.90000001-149560735.19506	0.32227	0.26104	2.32179	15.0733	0	0.00667579
NC_006089.4	97670524	97670694	NC_006089.4.90000001-149560735.22418	0.26701	0.19477	3.09447	15.1918	0	0.00604209
NC_006089.4	97705117	97705238	NC_006089.4.90000001-149560735.22605	0.41659	0.30982	2.87482	14.9304	0	0.00667579
NC_006089.4	97892825	97893070	NC_006089.4.90000001-149560735.23179	0.39751	0.32548	2.26108	15.241	0	0.00604209
NC_006089.4	97978815	97978936	NC_006089.4.90000001-149560735.23518	0.50096	0.39853	2.38772	11.2671	0	0.0413202
NC_006089.4	98079551	98079657	NC_006089.4.90000001-149560735.23901	0.46874	0.34135	3.00555	16.1778	0	0.00529183
NC_006089.4	98189233	98189345	NC_006089.4.90000001-149560735.24379	0.5983	0.42547	3.27239	23.3978	0	0
NC_006089.4	98245353	98245547	NC_006089.4.90000001-149560735.24664	0.29434	0.22819	2.5718	13.6619	0	0.015854
NC_006089.4	99009795	99009926	NC_006089.4.90000001-149560735.27580	0.41096	0.30552	2.90564	15.908	0	0.00529183
NC_006089.4	99197179	99197324	NC_006089.4.90000001-149560735.28556	0.41179	0.32238	2.50164	12.5992	0	0.0250665
NC_006089.4	99328811	99329058	NC_006089.4.90000001-149560735.29171	0.16017	0.11539	3.10871	14.6701	0	0.00998135
NC_006089.4	99666027	99666145	NC_006089.4.90000001-149560735.30355	0.44722	0.35009	2.5442	11.8124	0	0.0325817
NC_006089.4	102560400	102560502	NC_006089.4.90000001-149560735.40077	0.39158	0.29076	2.96074	12.4765	0	0.025365
NC_006089.4	102996430	102996969	NC_006089.4.90000001-149560735.41855	0.35305	0.29787	2.01156	22.4327	0	0
NC_006089.4	103770013	103770114	NC_006089.4.90000001-149560735.44927	0.47993	0.34608	3.06652	15.7761	0	0.00529183
NC_006089.4	103827447	103827688	NC_006089.4.90000001-149560735.45273	0.38376	0.29708	2.59761	21.3732	0	0
NC_006089.4	103942126	103942449	NC_006089.4.90000001-149560735.46039	0.25708	0.21155	2.17072	12.6127	0	0.0250665
NC_006089.4	104006514	104006713	NC_006089.4.90000001-149560735.46537	0.26278	0.19358	2.92849	16.3142	0	0.00529183
NC_006089.4	104012813	104013229	NC_006089.4.90000001-149560735.46592	0.1519	0.12256	2.29509	11.363	0	0.039693
NC_006089.4	104143517	104143634	NC_006089.4.90000001-149560735.47444	0.39003	0.29637	2.71781	12.3235	0	0.0268336
NC_006089.4	104160776	104161048	NC_006089.4.90000001-149560735.47553	0.25669	0.1943	2.73172	18.8035	0	0
NC_006089.4	105025691	105025808	NC_006089.4.90000001-149560735.51586	0.55273	0.40707	3.00671	19.1277	0	0
NC_006089.4	105279161	105279383	NC_006089.4.90000001-149560735.52891	0.47437	0.38668	2.26448	16.6282	0	0.00529183
NC_006089.4	105334604	105334795	NC_006089.4.90000001-149560735.53187	0.42338	0.34492	2.22275	12.3688	0	0.0263269
NC_006089.4	105477362	105477481	NC_006089.4.90000001-149560735.53809	0.42103	0.26503	4.30922	29.661	0	0
NC_006089.4	105497706	105497865	NC_006089.4.90000001-149560735.53868	0.32497	0.24724	2.69014	13.4379	0	0.015854
NC_006089.4	106071657	106071779	NC_006089.4.90000001-149560735.55289	0.61694	0.47577	2.66369	16.4314	0	0.00529183
NC_006089.4	106228713	106228819	NC_006089.4.90000001-149560735.55700	0.47759	0.37049	2.55145	11.7386	0	0.0339651
NC_006089.4	106897035	106897165	NC_006089.4.90000001-149560735.57859	0.49619	0.34212	3.22265	18.3868	0	0
NC_006089.4	106897768	106897879	NC_006089.4.90000001-149560735.57863	0.49909	0.3634	2.90034	15.5094	0	0.00604209
NC_006089.4	107000531	107000648	NC_006089.4.90000001-149560735.58376	0.30847	0.22568	3.01092	11.7289	0	0.0344687
NC_006089.4	107290680	107290860	NC_006089.4.90000001-149560735.59346	0.45994	0.38053	2.12535	11.4191	0	0.0391986
NC_006089.4	107370515	107370628	NC_006089.4.90000001-149560735.59746	0.43393	0.3311	2.68456	12.3303	0	0.0268336
NC_006089.4	107477521	107478046	NC_006089.4.90000001-149560735.60179	0.15732	0.12686	2.29592	14.6323	0	0.00998135
NC_006089.4	107658897	107659022	NC_006089.4.90000001-149560735.60944	0.48361	0.37496	2.58117	13.8267	0	0.0138965
NC_006089.4	108485154	108485423	NC_006089.4.90000001-149560735.64677	0.44138	0.36909	2.05707	14.1401	0	0.0120389
NC_006089.4	108595326	108595561	NC_006089.4.90000001-149560735.65475	0.26146	0.2091	2.37769	11.5506	0	0.037518
NC_006089.4	108636242	108636361	NC_006089.4.90000001-149560735.65767	0.41762	0.30038	3.16758	17.6255	0	0.00137049
NC_006089.4	108686642	108686775	NC_006089.4.90000001-149560735.66077	0.50197	0.37903	2.80142	17.8244	0	0.00137049
NC_006089.4	109909894	109910030	NC_006089.4.90000001-149560735.68545	0.32117	0.23966	2.85553	12.8469	0	0.0204559
NC_006089.4	110037771	110037944	NC_006089.4.90000001-149560735.69046	0.39745	0.31408	2.44991	14.2052	0	0.0120389
NC_006089.4	110767240	110767465	NC_006089.4.90000001-149560735.70596	0.41183	0.32884	2.38442	17.814	0	0.00137049
NC_006089.4	112084919	112085057	NC_006089.4.90000001-149560735.75022	0.37975	0.29762	2.50238	11.4304	0	0.038365
NC_006089.4	112367116	112367239	NC_006089.4.90000001-149560735.76183	0.33967	0.25378	3.09922	13.5078	0	0.015854
NC_006089.4	112496779	112497033	NC_006089.4.90000001-149560735.76545	0.39337	0.32373	2.16215	14.8043	0	0.00852012
NC_006089.4	112591471	112591690	NC_006089.4.90000001-149560735.77000	0.37985	0.3112	2.181	12.6348	0	0.0233309
NC_006089.4	112745247	112745441	NC_006089.4.90000001-149560735.77811	0.37177	0.29708	2.39513	13.4793	0	0.015854
NC_006089.4	112808505	112808622	NC_006089.4.90000001-149560735.78063	0.41154	0.29948	3.09129	16.1659	0	0.00529183
NC_006089.4	112958592	112958922	NC_006089.4.90000001-149560735.78677	0.38484	0.29317	2.70549	33.1916	0	0
NC_006089.4	113022853	113023063	NC_006089.4.90000001-149560735.78928	0.46779	0.3623	2.61054	22.8628	0	0
NC_006089.4	114441327	114441580	NC_006089.4.90000001-149560735.84057	0.24702	0.1914	2.46695	12.9698	0	0.0193234
NC_006089.4	114519412	114519531	NC_006089.4.90000001-149560735.84335	0.53507	0.40675	2.53772	12.7456	0	0.0222074
NC_006089.4	114683137	114683296	NC_006089.4.90000001-149560735.85052	0.4537	0.35132	2.57185	15.4056	0	0.00604209
NC_006089.4	115155944	115156053	NC_006089.4.90000001-149560735.86900	0.45952	0.35524	2.7172	12.2941	0	0.0268987
NC_006089.4	115162620	115162756	NC_006089.4.90000001-149560735.86949	0.27607	0.20525	2.87463	11.3924	0	0.0391986
NC_006089.4	115162778	115162956	NC_006089.4.90000001-149560735.86951	0.39312	0.31993	2.2319	11.2609	0	0.0413202
NC_006089.4	115827161	115827390	NC_006089.4.90000001-149560735.89248	0.15227	0.09874	3.78769	17.3411	0	0.00257932
NC_006089.4	116748197	116748308	NC_006089.4.90000001-149560735.92362	0.44163	0.3203	2.93302	13.9	0	0.0138965
NC_006089.4	117358882	117359015	NC_006089.4.90000001-149560735.94696	0.43953	0.34788	2.47706	11.7792	0	0.0334751
NC_006089.4	117390228	117390415	NC_006089.4.90000001-149560735.94849	0.28557	0.21391	2.80349	15.5416	0	0.00604209
NC_006089.4	117402327	117402644	NC_006089.4.90000001-149560735.94899	0.26302	0.21258	2.29594	14.4194	0	0.0120389
NC_006089.4	117529350	117529515	NC_006089.4.90000001-149560735.95531	0.37911	0.29557	2.52753	14.0211	0	0.0127202
NC_006089.4	117538710	117538874	NC_006089.4.90000001-149560735.95594	0.42925	0.33392	2.50679	15.3616	0	0.00604209
NC_006089.4	117690057	117690441	NC_006089.4.90000001-149560735.96193	0.28275	0.24167	1.92474	11.1882	0	0.0434679
NC_006089.4	117921983	117922098	NC_006089.4.90000001-149560735.96914	0.42446	0.29992	3.26483	18.5916	0	0
NC_006089.4	118111314	118111507	NC_006089.4.90000001-149560735.97625	0.3226	0.24832	2.64096	15.4808	0	0.00604209
NC_006089.4	118684402	118684584	NC_006089.4.90000001-149560735.99628	0.43682	0.3539	2.27603	12.68	0	0.0233309
NC_006089.4	119153259	119153425	NC_006089.4.90000001-149560735.101121	0.62394	0.41161	3.58175	37.5776	0	0
NC_006089.4	119204251	119204476	NC_006089.4.90000001-149560735.101303	0.29457	0.21007	3.20523	24.9055	0	0
NC_006089.4	119543399	119543529	NC_006089.4.90000001-149560735.102359	0.52035	0.40444	2.58727	15.4244	0	0.00604209
NC_006089.4	119543531	119543645	NC_006089.4.90000001-149560735.102360	0.45538	0.3384	2.9315	15.5698	0	0.00529183
NC_006089.4	119615016	119615212	NC_006089.4.90000001-149560735.102594	0.23699	0.14812	4.32368	28.598	0	0
NC_006089.4	119672726	119672945	NC_006089.4.90000001-149560735.102870	0.28806	0.23077	2.35972	11.9991	0	0.0302964
NC_006089.4	119684945	119685112	NC_006089.4.90000001-149560735.102930	0.4428	0.36132	2.24252	11.7961	0	0.0334751
NC_006089.4	119707121	119707236	NC_006089.4.90000001-149560735.103057	0.35097	0.25579	3.01233	12.8099	0	0.0217041
NC_006089.4	119881330	119881453	NC_006089.4.90000001-149560735.104072	0.4488	0.33815	2.64163	13.5089	0	0.015854
NC_006089.4	120540952	120541122	NC_006089.4.90000001-149560735.105655	0.42233	0.33279	2.46331	14.2993	0	0.0120389
NC_006089.4	120570976	120571086	NC_006089.4.90000001-149560735.105811	0.59081	0.46029	2.43094	12.1379	0	0.0291028
NC_006089.4	121157000	121157100	NC_006089.4.90000001-149560735.107015	0.51752	0.39475	2.75809	13.554	0	0.015854
NC_006089.4	121184106	121184228	NC_006089.4.90000001-149560735.107092	0.36624	0.27106	2.9171	13.2241	0	0.0169766
NC_006089.4	121218154	121218300	NC_006089.4.90000001-149560735.107199	0.41199	0.31381	2.69027	15.3748	0	0.00604209
NC_006089.4	121496506	121496663	NC_006089.4.90000001-149560735.108197	0.34936	0.26886	2.63032	13.5354	0	0.015854
NC_006089.4	122170233	122170533	NC_006089.4.90000001-149560735.110650	0.31258	0.2601	2.02781	11.1631	0	0.0438115
NC_006089.4	122281867	122281974	NC_006089.4.90000001-149560735.111011	0.61733	0.49343	2.35186	11.7438	0	0.0339651
NC_006089.4	122768213	122768337	NC_006089.4.90000001-149560735.111910	0.47095	0.36076	2.53676	12.3248	0	0.0268336
NC_006089.4	122837992	122838094	NC_006089.4.90000001-149560735.112097	0.57499	0.42912	2.83337	15.7962	0	0.00529183
NC_006089.4	122939225	122939534	NC_006089.4.90000001-149560735.112371	0.4331	0.36238	2.05667	16.9665	0	0.00374665
NC_006089.4	122951701	122951924	NC_006089.4.90000001-149560735.112400	0.3953	0.32957	2.1035	11.5806	0	0.037518
NC_006089.4	123627839	123628097	NC_006089.4.90000001-149560735.114210	0.19506	0.14882	2.69244	12.7577	0	0.0222074
NC_006089.4	124086482	124086609	NC_006089.4.90000001-149560735.115250	0.31973	0.22086	3.45735	17.2842	0	0.00257932
NC_006089.4	124103225	124103396	NC_006089.4.90000001-149560735.115301	0.44317	0.33202	3.0022	22.2491	0	0
NC_006089.4	124380316	124380577	NC_006089.4.90000001-149560735.115957	0.44633	0.34824	2.56577	25.7199	0	0
NC_006089.4	124556683	124556796	NC_006089.4.90000001-149560735.116370	0.53924	0.40084	2.96751	18.3075	0	0
NC_006089.4	124677439	124677790	NC_006089.4.90000001-149560735.116623	0.42741	0.36397	1.95429	15.9327	0	0.00529183
NC_006089.4	125293011	125293151	NC_006089.4.90000001-149560735.118351	0.40904	0.31859	2.56066	12.7077	0	0.0228238
NC_006089.4	125497715	125497976	NC_006089.4.90000001-149560735.118937	0.38093	0.29216	2.75888	25.2224	0	0
NC_006089.4	125671502	125671659	NC_006089.4.90000001-149560735.119816	0.1238	0.07441	4.57744	13.5724	0	0.015854
NC_006089.4	125780799	125781336	NC_006089.4.90000001-149560735.120365	0.3085	0.26729	1.84185	14.6529	0	0.00998135
NC_006089.4	125805059	125805260	NC_006089.4.90000001-149560735.120499	0.358	0.28562	2.36295	13.6606	0	0.015854
NC_006089.4	125997692	125997866	NC_006089.4.90000001-149560735.121447	0.27034	0.20496	2.72943	12.7175	0	0.0222074
NC_006089.4	126125573	126126060	NC_006089.4.90000001-149560735.121995	0.14536	0.11677	2.32536	13.1295	0	0.0183368
NC_006089.4	126175213	126175487	NC_006089.4.90000001-149560735.122238	0.29568	0.23043	2.54218	17.9317	0	0.00137049
NC_006089.4	126235539	126235736	NC_006089.4.90000001-149560735.122543	0.43457	0.3426	2.45996	17.3028	0	0.00257932
NC_006089.4	126266751	126266947	NC_006089.4.90000001-149560735.122709	0.38233	0.31214	2.22385	11.5419	0	0.037518
NC_006089.4	126654015	126654156	NC_006089.4.90000001-149560735.124303	0.41351	0.3206	2.66449	13.1771	0	0.0169766
NC_006089.4	127065870	127066184	NC_006089.4.90000001-149560735.126066	0.30368	0.25515	2.03129	11.8743	0	0.031507
NC_006089.4	127072784	127072925	NC_006089.4.90000001-149560735.126103	0.51246	0.41713	2.22366	11.2388	0	0.0421582
NC_006089.4	127074008	127074460	NC_006089.4.90000001-149560735.126113	0.33125	0.27373	2.14252	21.3729	0	0
NC_006089.4	127095483	127095746	NC_006089.4.90000001-149560735.126193	0.28622	0.23631	2.14854	11.0778	0	0.046137
NC_006089.4	127104677	127104804	NC_006089.4.90000001-149560735.126241	0.43341	0.33814	2.53727	12.9781	0	0.0193234
NC_006089.4	127106072	127106186	NC_006089.4.90000001-149560735.126256	0.42092	0.29618	3.34262	18.5251	0	0
NC_006089.4	127381898	127382003	NC_006089.4.90000001-149560735.127513	0.32194	0.22772	3.31634	12.9364	0	0.0193234
NC_006089.4	127388957	127389296	NC_006089.4.90000001-149560735.127540	0.43086	0.34935	2.28542	24.223	0	0
NC_006089.4	127813988	127814109	NC_006089.4.90000001-149560735.129381	0.46096	0.35583	2.63643	13.0644	0	0.0189173
NC_006089.4	127826792	127826975	NC_006089.4.90000001-149560735.129438	0.42542	0.33865	2.38476	15.0716	0	0.00667579
NC_006089.4	128251883	128252088	NC_006089.4.90000001-149560735.131195	0.37692	0.29862	2.4523	15.6704	0	0.00529183
NC_006089.4	128252143	128252418	NC_006089.4.90000001-149560735.131197	0.29099	0.23055	2.42878	16.0448	0	0.00529183
NC_006089.4	128311352	128311473	NC_006089.4.90000001-149560735.131338	0.44031	0.32643	2.91593	15.4382	0	0.00604209
NC_006089.4	128448714	128449082	NC_006089.4.90000001-149560735.131807	0.19021	0.15523	2.22149	11.3658	0	0.039693
NC_006089.4	128844295	128844541	NC_006089.4.90000001-149560735.133037	0.24031	0.19101	2.38984	11.9219	0	0.031249
NC_006089.4	128844807	128844949	NC_006089.4.90000001-149560735.133041	0.26155	0.19492	2.87137	11.1071	0	0.045665
NC_006089.4	128878929	128879207	NC_006089.4.90000001-149560735.133270	0.22547	0.17981	2.38551	12.4832	0	0.025365
NC_006089.4	128920116	128920245	NC_006089.4.90000001-149560735.133489	0.32832	0.21982	3.76151	20.2445	0	0
NC_006089.4	129082146	129082260	NC_006089.4.90000001-149560735.134129	0.35676	0.24373	3.40362	15.596	0	0.00529183
NC_006089.4	129273667	129274143	NC_006089.4.90000001-149560735.134818	0.29658	0.24075	2.24262	23.2189	0	0
NC_006089.4	129758692	129759025	NC_006089.4.90000001-149560735.136806	0.25312	0.19693	2.54577	18.7587	0	0
NC_006089.4	130066154	130066298	NC_006089.4.90000001-149560735.137775	0.46242	0.3095	3.73358	31.3643	0	0
NC_006089.4	130093908	130094076	NC_006089.4.90000001-149560735.137880	0.3464	0.24651	3.22421	21.893	0	0
NC_006089.4	130163583	130163795	NC_006089.4.90000001-149560735.138005	0.29263	0.22668	2.5077	12.5141	0	0.025365
NC_006089.4	130657615	130657866	NC_006089.4.90000001-149560735.139380	0.29863	0.24122	2.26799	12.7564	0	0.0222074
NC_006089.4	130718323	130718507	NC_006089.4.90000001-149560735.139670	0.35209	0.23653	3.43231	25.2716	0	0
NC_006089.4	130827645	130827996	NC_006089.4.90000001-149560735.140164	0.24904	0.1899	2.68896	22.9788	0	0
NC_006089.4	130875196	130875382	NC_006089.4.90000001-149560735.140395	0.47205	0.38172	2.28768	14.5137	0	0.0117396
NC_006089.4	130987205	130987687	NC_006089.4.90000001-149560735.140786	0.27161	0.21914	2.29125	22.9446	0	0
NC_006089.4	131042626	131042791	NC_006089.4.90000001-149560735.140971	0.29979	0.22045	2.9995	16.3825	0	0.00529183
NC_006089.4	131064374	131064519	NC_006089.4.90000001-149560735.141081	0.47314	0.37969	2.34897	12.2862	0	0.0268987
NC_006089.4	131103808	131103948	NC_006089.4.90000001-149560735.141261	0.40491	0.28096	3.41097	22.3255	0	0
NC_006089.4	131130553	131130658	NC_006089.4.90000001-149560735.141395	0.5463	0.42333	2.58859	13.465	0	0.015854
NC_006089.4	131156643	131157003	NC_006089.4.90000001-149560735.141549	0.29987	0.23914	2.39558	20.9161	0	0
NC_006089.4	131507541	131507653	NC_006089.4.90000001-149560735.142763	0.52472	0.36829	3.30224	22.1333	0	0
NC_006089.4	131752729	131752856	NC_006089.4.90000001-149560735.143363	0.45169	0.34117	2.78132	15.6481	0	0.00529183
NC_006089.4	131860421	131860610	NC_006089.4.90000001-149560735.143699	0.29781	0.22993	2.59937	13.2475	0	0.0169766
NC_006089.4	132032385	132032604	NC_006089.4.90000001-149560735.144241	0.38707	0.30096	2.57062	18.8746	0	0
NC_006089.4	132167475	132167646	NC_006089.4.90000001-149560735.144561	0.48833	0.40423	2.14412	11.3484	0	0.0401207
NC_006089.4	132187808	132187971	NC_006089.4.90000001-149560735.144639	0.39594	0.30117	2.92792	17.3977	0	0.00257932
NC_006089.4	132408143	132408713	NC_006089.4.90000001-149560735.145365	0.23239	0.19787	1.94027	14.007	0	0.013461
NC_006089.4	134851135	134851505	NC_006089.4.90000001-149560735.149061	0.32558	0.27925	1.89251	11.9161	0	0.031249
NC_006089.4	134905793	134905957	NC_006089.4.90000001-149560735.149249	0.49157	0.35406	3.05005	24.5085	0	0
NC_006089.4	134945431	134945538	NC_006089.4.90000001-149560735.149466	0.46011	0.34463	3.00181	14.9881	0	0.00667579
NC_006089.4	134945552	134945691	NC_006089.4.90000001-149560735.149467	0.39483	0.30184	2.67006	13.8002	0	0.0146699
NC_006089.4	134997450	134997717	NC_006089.4.90000001-149560735.149772	0.23173	0.18254	2.47677	12.9284	0	0.0193234
NC_006089.4	135014165	135014413	NC_006089.4.90000001-149560735.149859	0.31935	0.24222	2.87323	21.4583	0	0
NC_006089.4	135016365	135016680	NC_006089.4.90000001-149560735.149874	0.35592	0.25359	3.20376	39.4189	0	0
NC_006089.4	135083866	135084664	NC_006089.4.90000001-149560735.150319	0.20907	0.16947	2.26877	28.5373	0	0
NC_006089.4	135098140	135098405	NC_006089.4.90000001-149560735.150432	0.17441	0.13369	2.64985	12.1448	0	0.0280475
NC_006089.4	135164594	135164824	NC_006089.4.90000001-149560735.150875	0.54886	0.44308	2.513	24.1476	0	0
NC_006089.4	135349327	135349496	NC_006089.4.90000001-149560735.151742	0.42251	0.34176	2.27426	11.2355	0	0.0421582
NC_006089.4	135354967	135355069	NC_006089.4.90000001-149560735.151760	0.38026	0.27723	3.00679	12.7176	0	0.0222074
NC_006089.4	135435760	135435956	NC_006089.4.90000001-149560735.152191	0.49369	0.38131	2.5792	20.6073	0	0
NC_006089.4	135625951	135626097	NC_006089.4.90000001-149560735.153124	0.54554	0.43252	2.30402	12.3054	0	0.0268987
NC_006089.4	135845886	135846015	NC_006089.4.90000001-149560735.154054	0.38987	0.30061	2.63105	12.2306	0	0.0268987
NC_006089.4	135918022	135918206	NC_006089.4.90000001-149560735.154410	0.30536	0.20518	3.67241	25.728	0	0
NC_006089.4	136072539	136072856	NC_006089.4.90000001-149560735.155402	0.33872	0.24063	3.28339	40.2108	0	0
NC_006089.4	136170506	136170779	NC_006089.4.90000001-149560735.155960	0.27931	0.22603	2.29193	12.9453	0	0.0193234
NC_006089.4	136220727	136220827	NC_006089.4.90000001-149560735.156293	0.56618	0.40127	3.26548	21.0939	0	0
NC_006089.4	136244357	136244567	NC_006089.4.90000001-149560735.156421	0.48544	0.39905	2.17939	14.6263	0	0.00998135
NC_006089.4	136245699	136245804	NC_006089.4.90000001-149560735.156427	0.43083	0.32934	2.69987	11.3965	0	0.0391986
NC_006089.4	136463385	136463485	NC_006089.4.90000001-149560735.157487	0.49704	0.37964	2.69119	12.6436	0	0.0233309
NC_006089.4	136595640	136595763	NC_006089.4.90000001-149560735.158033	0.40959	0.28757	3.36927	20.9986	0	0
NC_006089.4	136792348	136792509	NC_006089.4.90000001-149560735.158869	0.47693	0.38103	2.36391	11.5027	0	0.037518
NC_006089.4	137141762	137141877	NC_006089.4.90000001-149560735.160373	0.41028	0.28704	3.29345	17.0921	0	0.00257932
NC_006089.4	137639280	137639404	NC_006089.4.90000001-149560735.162366	0.2691	0.18629	3.41944	14.1805	0	0.0120389
NC_006089.4	137762476	137762712	NC_006089.4.90000001-149560735.162769	0.50307	0.38962	2.8339	28.9283	0	0
NC_006089.4	137861972	137862116	NC_006089.4.90000001-149560735.163157	0.33696	0.2609	2.59282	11.3923	0	0.0391986
NC_006089.4	137968650	137968783	NC_006089.4.90000001-149560735.163597	0.3594	0.25891	3.11348	16.7882	0	0.00496012
NC_006089.4	138610086	138610193	NC_006089.4.90000001-149560735.165979	0.46466	0.34428	2.92716	13.961	0	0.0138965
NC_006089.4	138961848	138961967	NC_006089.4.90000001-149560735.167797	0.30725	0.21233	3.48704	16.0259	0	0.00529183
NC_006089.4	139153179	139153334	NC_006089.4.90000001-149560735.168765	0.54119	0.43947	2.38763	14.742	0	0.00998135
NC_006089.4	139588144	139588333	NC_006089.4.90000001-149560735.170608	0.3969	0.31183	2.55864	16.0556	0	0.00529183
NC_006089.4	140248931	140249132	NC_006089.4.90000001-149560735.173796	0.40365	0.32745	2.26042	13.2798	0	0.016492
NC_006089.4	140547514	140547716	NC_006089.4.90000001-149560735.174915	0.39385	0.32126	2.23915	12.6074	0	0.0250665
NC_006089.4	140642479	140642608	NC_006089.4.90000001-149560735.175207	0.43128	0.31719	3.06963	18.3573	0	0
NC_006089.4	140839586	140839830	NC_006089.4.90000001-149560735.175916	0.21994	0.15799	3.15576	19.0032	0	0
NC_006089.4	141522754	141522864	NC_006089.4.90000001-149560735.178035	0.20935	0.12317	4.85364	16.5939	0	0.00529183
NC_006089.4	142244243	142244399	NC_006089.4.90000001-149560735.180793	0.43988	0.33256	2.82726	18.6585	0	0
NC_006089.4	142757674	142757834	NC_006089.4.90000001-149560735.182234	0.30079	0.20413	3.48236	20.3683	0	0
NC_006089.4	142787154	142787368	NC_006089.4.90000001-149560735.182298	0.39223	0.31182	2.27275	13.2775	0	0.016492
NC_006089.4	142912130	142912409	NC_006089.4.90000001-149560735.182464	0.32472	0.26355	2.24554	14.9291	0	0.00667579
NC_006089.4	142965262	142965424	NC_006089.4.90000001-149560735.182721	0.28984	0.20858	3.16848	16.6124	0	0.00529183
NC_006089.4	143022282	143022584	NC_006089.4.90000001-149560735.182958	0.35953	0.30311	2.002	11.8864	0	0.031507
NC_006089.4	143061618	143061738	NC_006089.4.90000001-149560735.183120	0.35569	0.26211	3.05814	14.0088	0	0.013461
NC_006089.4	143240164	143240415	NC_006089.4.90000001-149560735.183661	0.22844	0.13652	4.68618	40.0918	0	0
NC_006089.4	143297217	143297472	NC_006089.4.90000001-149560735.183844	0.32613	0.2666	2.20826	13.0345	0	0.0189173
NC_006089.4	143586302	143586445	NC_006089.4.90000001-149560735.184600	0.3779	0.28267	2.78804	14.7191	0	0.00998135
NC_006089.4	144991640	144991756	NC_006089.4.90000001-149560735.188400	0.43514	0.3202	2.93622	14.8191	0	0.00758223
NC_006089.4	145109207	145109539	NC_006089.4.90000001-149560735.188864	0.27991	0.23429	2.05546	12.071	0	0.029537
NC_006089.4	145195429	145195562	NC_006089.4.90000001-149560735.189322	0.23251	0.16097	3.40562	12.4925	0	0.025365
NC_006089.4	145266010	145266206	NC_006089.4.90000001-149560735.189688	0.4607	0.37599	2.29945	14.7745	0	0.00941222
NC_006089.4	145460183	145460308	NC_006089.4.90000001-149560735.190550	0.38545	0.29046	2.88767	12.8632	0	0.0204559
NC_006089.4	146694484	146694603	NC_006089.4.90000001-149560735.194653	0.43253	0.33471	2.59789	11.6712	0	0.0348432
NC_006089.4	147298571	147298671	NC_006089.4.90000001-149560735.196501	0.45621	0.3235	3.25146	17.0568	0	0.00257932
NC_006089.4	148112026	148112164	NC_006089.4.90000001-149560735.199493	0.51951	0.42624	2.23112	11.1982	0	0.0430531
NC_006089.4	148638833	148638972	NC_006089.4.90000001-149560735.201130	0.24301	0.16059	3.90753	17.976	0	0.00137049
NC_006090.4	819907	820110	NC_006090.4.1-90000000.2866	0.26018	0.19906	2.66958	13.8787	0	0.0138965
NC_006090.4	827253	827368	NC_006090.4.1-90000000.2913	0.46254	0.35561	2.82306	13.6068	0	0.015854
NC_006090.4	847460	847572	NC_006090.4.1-90000000.3035	0.45347	0.34921	2.60658	11.7513	0	0.0339651
NC_006090.4	913868	913974	NC_006090.4.1-90000000.3326	0.49289	0.38531	2.55788	11.1529	0	0.0438115
NC_006090.4	1027137	1027353	NC_006090.4.1-90000000.3842	0.5481	0.45267	2.32681	18.4009	0	0
NC_006090.4	1288228	1288362	NC_006090.4.1-90000000.5122	0.29969	0.19554	3.9035	20.8509	0	0
NC_006090.4	1440146	1440542	NC_006090.4.1-90000000.6053	0.29296	0.2243	2.65782	27.4934	0	0
NC_006090.4	1475087	1475193	NC_006090.4.1-90000000.6261	0.46947	0.34441	2.79573	13.0301	0	0.0189173
NC_006090.4	1579387	1579598	NC_006090.4.1-90000000.6891	0.3036	0.24308	2.36261	11.5842	0	0.037518
NC_006090.4	4587536	4587669	NC_006090.4.1-90000000.18180	0.71375	0.47806	3.58359	32.9624	0	0
NC_006090.4	4951795	4951998	NC_006090.4.1-90000000.19884	0.26006	0.18205	3.33418	21.9203	0	0
NC_006090.4	4996167	4996269	NC_006090.4.1-90000000.20142	0.32385	0.2227	3.53312	14.3373	0	0.0120389
NC_006090.4	5152201	5152301	NC_006090.4.1-90000000.20767	0.54189	0.41244	2.89285	14.6816	0	0.00998135
NC_006090.4	5205849	5205996	NC_006090.4.1-90000000.21028	0.4164	0.32954	2.58139	13.0096	0	0.0193234
NC_006090.4	5254069	5254304	NC_006090.4.1-90000000.21277	0.37102	0.30641	2.13728	12.1141	0	0.0291028
NC_006090.4	5291784	5292015	NC_006090.4.1-90000000.21475	0.37547	0.29631	2.40197	16.7346	0	0.00496012
NC_006090.4	5306999	5307216	NC_006090.4.1-90000000.21549	0.20444	0.14994	2.93142	13.2454	0	0.0169766
NC_006090.4	5322953	5323197	NC_006090.4.1-90000000.21642	0.37485	0.29864	2.32903	16.2131	0	0.00529183
NC_006090.4	5325986	5326143	NC_006090.4.1-90000000.21675	0.34462	0.24008	3.2666	20.1429	0	0
NC_006090.4	5346122	5346232	NC_006090.4.1-90000000.21785	0.43667	0.27961	4.04575	25.5315	0	0
NC_006090.4	5364967	5365157	NC_006090.4.1-90000000.21887	0.30961	0.24197	2.45147	12.2313	0	0.0268987
NC_006090.4	5385475	5385865	NC_006090.4.1-90000000.22025	0.29784	0.22045	2.8273	31.3074	0	0
NC_006090.4	5392633	5392762	NC_006090.4.1-90000000.22070	0.46965	0.35066	2.89848	16.0895	0	0.00529183
NC_006090.4	5454703	5454881	NC_006090.4.1-90000000.22336	0.45222	0.36552	2.23529	13.3689	0	0.015854
NC_006090.4	5494882	5495069	NC_006090.4.1-90000000.22509	0.45152	0.35923	2.40971	16.7038	0	0.00529183
NC_006090.4	5501076	5501179	NC_006090.4.1-90000000.22536	0.44007	0.28814	3.93513	23.6373	0	0
NC_006090.4	5553559	5553703	NC_006090.4.1-90000000.22770	0.39192	0.2882	2.94303	17.6059	0	0.00137049
NC_006090.4	5594475	5594648	NC_006090.4.1-90000000.22946	0.35948	0.28566	2.43821	12.3384	0	0.0268336
NC_006090.4	5833647	5833906	NC_006090.4.1-90000000.23544	0.3544	0.27892	2.26859	14.5056	0	0.0117396
NC_006090.4	5875160	5875291	NC_006090.4.1-90000000.23662	0.54085	0.38449	2.92736	18.9757	0	0
NC_006090.4	5893326	5893590	NC_006090.4.1-90000000.23713	0.3585	0.28611	2.37405	18.0935	0	0.00137049
NC_006090.4	6195867	6196069	NC_006090.4.1-90000000.24516	0.40908	0.318	2.43817	16.1131	0	0.00529183
NC_006090.4	6273307	6273450	NC_006090.4.1-90000000.24752	0.39622	0.30715	2.55392	12.4122	0	0.0263269
NC_006090.4	6944467	6944615	NC_006090.4.1-90000000.26432	0.54463	0.40906	2.68481	18.3662	0	0
NC_006090.4	7305129	7305372	NC_006090.4.1-90000000.27946	0.44007	0.3604	2.19315	15.7265	0	0.00529183
NC_006090.4	10267096	10267221	NC_006090.4.1-90000000.40063	0.4852	0.33323	3.48344	25.1138	0	0
NC_006090.4	10502479	10502584	NC_006090.4.1-90000000.41327	0.32448	0.21443	3.78814	16.9045	0	0.00374665
NC_006090.4	10525034	10525167	NC_006090.4.1-90000000.41482	0.50639	0.39657	2.51192	14.0956	0	0.0127202
NC_006090.4	10621153	10621297	NC_006090.4.1-90000000.42073	0.39892	0.3157	2.5217	12.0034	0	0.0302964
NC_006090.4	10728380	10728509	NC_006090.4.1-90000000.42729	0.39483	0.27476	3.31267	17.6841	0	0.00137049
NC_006090.4	10729565	10729895	NC_006090.4.1-90000000.42734	0.20666	0.16431	2.39943	13.714	0	0.0152815
NC_006090.4	10762831	10762954	NC_006090.4.1-90000000.42925	0.48304	0.38129	2.47228	12.1136	0	0.0291028
NC_006090.4	10799299	10799546	NC_006090.4.1-90000000.43164	0.34342	0.28473	2.09107	11.2459	0	0.0421582
NC_006090.4	10918294	10918518	NC_006090.4.1-90000000.43839	0.37488	0.25866	3.51335	36.0122	0	0
NC_006090.4	10925564	10925744	NC_006090.4.1-90000000.43882	0.30904	0.23783	2.56902	13.0984	0	0.0183368
NC_006090.4	10933053	10933194	NC_006090.4.1-90000000.43933	0.32118	0.23711	2.93902	13.957	0	0.0138965
NC_006090.4	10977084	10977381	NC_006090.4.1-90000000.44225	0.17573	0.12911	2.96855	16.7466	0	0.00496012
NC_006090.4	10994771	10995056	NC_006090.4.1-90000000.44314	0.23802	0.18244	2.63906	17.1941	0	0.00257932
NC_006090.4	11004966	11005455	NC_006090.4.1-90000000.44362	0.28948	0.24848	1.89083	13.8322	0	0.0138965
NC_006090.4	11013007	11013111	NC_006090.4.1-90000000.44425	0.33871	0.20774	4.52017	23.3188	0	0
NC_006090.4	11026167	11026520	NC_006090.4.1-90000000.44512	0.24222	0.19476	2.33903	15.6748	0	0.00529183
NC_006090.4	11039580	11039801	NC_006090.4.1-90000000.44605	0.44808	0.37724	2.04794	11.9981	0	0.0302964
NC_006090.4	11053125	11053607	NC_006090.4.1-90000000.44688	0.26359	0.21992	2.07347	16.8638	0	0.00374665
NC_006090.4	11060495	11060734	NC_006090.4.1-90000000.44732	0.2799	0.22253	2.40784	13.1317	0	0.0176987
NC_006090.4	11060872	11061027	NC_006090.4.1-90000000.44735	0.28954	0.21578	2.85288	13.3273	0	0.015854
NC_006090.4	11083420	11083620	NC_006090.4.1-90000000.44877	0.15808	0.11176	3.26217	11.9878	0	0.0302964
NC_006090.4	11103520	11103680	NC_006090.4.1-90000000.44972	0.20777	0.14237	3.48045	14.3884	0	0.0120389
NC_006090.4	11109288	11109456	NC_006090.4.1-90000000.44986	0.37874	0.2989	2.40668	12.507	0	0.025365
NC_006090.4	11119461	11119597	NC_006090.4.1-90000000.45045	0.18566	0.12541	3.64428	11.9946	0	0.0302964
NC_006090.4	11152824	11153027	NC_006090.4.1-90000000.45249	0.15025	0.09878	3.85712	15.8729	0	0.00529183
NC_006090.4	11161677	11162117	NC_006090.4.1-90000000.45297	0.16047	0.12129	2.75356	19.7084	0	0
NC_006090.4	11175688	11176286	NC_006090.4.1-90000000.45368	0.25576	0.20708	2.28127	26.4109	0	0
NC_006090.4	11178075	11178276	NC_006090.4.1-90000000.45382	0.31648	0.25029	2.43112	12.6742	0	0.0233309
NC_006090.4	11181321	11181541	NC_006090.4.1-90000000.45397	0.29105	0.20887	3.19003	23.8053	0	0
NC_006090.4	11201512	11201741	NC_006090.4.1-90000000.45492	0.47524	0.37546	2.52553	23.0274	0	0
NC_006090.4	11209339	11209608	NC_006090.4.1-90000000.45517	0.34239	0.2802	2.20108	13.7624	0	0.0152815
NC_006090.4	11577394	11577568	NC_006090.4.1-90000000.46823	0.42584	0.32	2.83504	20.8812	0	0
NC_006090.4	11585268	11585466	NC_006090.4.1-90000000.46849	0.39053	0.30603	2.51954	17.1581	0	0.00257932
NC_006090.4	11586559	11586715	NC_006090.4.1-90000000.46854	0.35797	0.28212	2.44189	11.3395	0	0.0401207
NC_006090.4	11593055	11593276	NC_006090.4.1-90000000.46875	0.36075	0.27039	2.73988	20.0037	0	0
NC_006090.4	12646499	12646659	NC_006090.4.1-90000000.48804	0.27108	0.20708	2.68555	11.6121	0	0.037518
NC_006090.4	12986864	12986997	NC_006090.4.1-90000000.50294	0.56387	0.4486	2.37524	12.3912	0	0.0263269
NC_006090.4	13222673	13222784	NC_006090.4.1-90000000.51482	0.37154	0.27357	3.10936	12.3217	0	0.0268336
NC_006090.4	14862452	14862564	NC_006090.4.1-90000000.58480	0.5143	0.39752	2.80648	14.4801	0	0.0120389
NC_006090.4	16674366	16674480	NC_006090.4.1-90000000.65798	0.36942	0.27113	2.87612	12.0923	0	0.0291028
NC_006090.4	17080200	17080370	NC_006090.4.1-90000000.66862	0.2461	0.18348	2.87321	12.6354	0	0.0233309
NC_006090.4	17553386	17553572	NC_006090.4.1-90000000.68631	0.38213	0.27898	3.06409	24.036	0	0
NC_006090.4	18504959	18505124	NC_006090.4.1-90000000.72902	0.5057	0.40902	2.38039	14.8256	0	0.00758223
NC_006090.4	18784853	18785126	NC_006090.4.1-90000000.74255	0.32554	0.2657	2.15929	12.7907	0	0.0217041
NC_006090.4	19100457	19100558	NC_006090.4.1-90000000.75587	0.47839	0.34615	3.08022	16.4715	0	0.00529183
NC_006090.4	19744496	19744731	NC_006090.4.1-90000000.78589	0.32918	0.26703	2.24823	12.9319	0	0.0193234
NC_006090.4	19901986	19902142	NC_006090.4.1-90000000.79087	0.33479	0.26028	2.55754	11.8914	0	0.031507
NC_006090.4	19945655	19945841	NC_006090.4.1-90000000.79323	0.42668	0.33765	2.41762	15.5462	0	0.00604209
NC_006090.4	20166641	20166946	NC_006090.4.1-90000000.80566	0.33627	0.28006	2.09555	13.64	0	0.015854
NC_006090.4	20273610	20273737	NC_006090.4.1-90000000.81160	0.44725	0.33227	2.89835	16.6651	0	0.00529183
NC_006090.4	20315340	20315488	NC_006090.4.1-90000000.81358	0.38145	0.29965	2.48176	11.719	0	0.0344687
NC_006090.4	20321520	20321676	NC_006090.4.1-90000000.81377	0.23494	0.16557	3.35381	14.644	0	0.00998135
NC_006090.4	20652852	20653150	NC_006090.4.1-90000000.82738	0.41769	0.33829	2.2555	19.6769	0	0
NC_006090.4	20665798	20666071	NC_006090.4.1-90000000.82798	0.38837	0.30389	2.50109	22.5424	0	0
NC_006090.4	20700701	20700805	NC_006090.4.1-90000000.82989	0.49251	0.36875	2.83524	13.2898	0	0.016492
NC_006090.4	20867579	20867903	NC_006090.4.1-90000000.83624	0.43705	0.36244	2.11501	19.086	0	0
NC_006090.4	21217285	21217512	NC_006090.4.1-90000000.85168	0.34325	0.27528	2.33824	14.3526	0	0.0120389
NC_006090.4	21246840	21246962	NC_006090.4.1-90000000.85317	0.46851	0.36692	2.49698	12.0345	0	0.0298894
NC_006090.4	21292338	21292499	NC_006090.4.1-90000000.85652	0.29697	0.2169	2.99407	15.2515	0	0.00604209
NC_006090.4	21545880	21546638	NC_006090.4.1-90000000.87177	0.19099	0.16706	1.77267	11.256	0	0.0417833
NC_006090.4	21564329	21564622	NC_006090.4.1-90000000.87280	0.3036	0.24823	2.24128	14.6014	0	0.00998135
NC_006090.4	21569963	21570275	NC_006090.4.1-90000000.87309	0.35284	0.23671	3.68708	51.2179	0	0
NC_006090.4	21685985	21686145	NC_006090.4.1-90000000.87971	0.49346	0.40612	2.17858	11.1945	0	0.0430531
NC_006090.4	21746501	21746655	NC_006090.4.1-90000000.88232	0.40617	0.32079	2.44955	12.361	0	0.0263269
NC_006090.4	22367369	22367541	NC_006090.4.1-90000000.90889	0.43812	0.35938	2.23101	11.8984	0	0.031507
NC_006090.4	23195774	23195901	NC_006090.4.1-90000000.94435	0.29057	0.19719	3.60441	15.8687	0	0.00529183
NC_006090.4	23207034	23207163	NC_006090.4.1-90000000.94514	0.29057	0.19719	3.60441	15.8687	0	0.00529183
NC_006090.4	23392427	23392549	NC_006090.4.1-90000000.95482	0.45348	0.35008	2.62566	12.6891	0	0.0228238
NC_006090.4	23484737	23484917	NC_006090.4.1-90000000.96057	0.48586	0.40407	2.09763	11.5882	0	0.037518
NC_006090.4	23962501	23962661	NC_006090.4.1-90000000.97856	0.33009	0.25014	2.74798	14.5704	0	0.00998135
NC_006090.4	23963487	23963671	NC_006090.4.1-90000000.97864	0.25661	0.1645	4.1003	26.9477	0	0
NC_006090.4	24518757	24518882	NC_006090.4.1-90000000.99758	0.5212	0.4105	2.44658	12.9025	0	0.0198822
NC_006090.4	24687136	24687270	NC_006090.4.1-90000000.100536	0.4904	0.35999	2.99899	20.6998	0	0
NC_006090.4	25437258	25437548	NC_006090.4.1-90000000.103855	0.41114	0.29178	3.26661	44.591	0	0
NC_006090.4	25446759	25446941	NC_006090.4.1-90000000.103893	0.29739	0.23358	2.48517	11.5479	0	0.037518
NC_006090.4	25460552	25460683	NC_006090.4.1-90000000.103957	0.34333	0.25047	3.04689	15.1005	0	0.00667579
NC_006090.4	25495392	25495622	NC_006090.4.1-90000000.104085	0.35832	0.27563	2.6349	20.149	0	0
NC_006090.4	25629089	25629241	NC_006090.4.1-90000000.104503	0.44282	0.32974	2.91064	19.2999	0	0
NC_006090.4	25712380	25712590	NC_006090.4.1-90000000.104838	0.28782	0.22556	2.49958	13.3309	0	0.015854
NC_006090.4	25737625	25737769	NC_006090.4.1-90000000.104963	0.35869	0.26666	2.88096	15.6197	0	0.00529183
NC_006090.4	25813309	25813418	NC_006090.4.1-90000000.105414	0.25123	0.16205	4.01276	15.1357	0	0.00667579
NC_006090.4	25814836	25814993	NC_006090.4.1-90000000.105422	0.4026	0.30776	2.58201	14.0793	0	0.0127202
NC_006090.4	25826005	25826185	NC_006090.4.1-90000000.105481	0.32415	0.21435	3.84847	29.4381	0	0
NC_006090.4	25841233	25841412	NC_006090.4.1-90000000.105545	0.3392	0.25101	2.94535	18.4385	0	0
NC_006090.4	25905667	25905812	NC_006090.4.1-90000000.105833	0.41149	0.29822	3.23342	21.1945	0	0
NC_006090.4	25988332	25988565	NC_006090.4.1-90000000.106209	0.32152	0.25808	2.31978	13.3963	0	0.015854
NC_006090.4	26243671	26243831	NC_006090.4.1-90000000.107360	0.36833	0.28284	2.68312	13.531	0	0.015854
NC_006090.4	26586553	26586704	NC_006090.4.1-90000000.108744	0.37434	0.29694	2.40732	11.2759	0	0.0413202
NC_006090.4	26588562	26588793	NC_006090.4.1-90000000.108762	0.31633	0.23014	3.04848	24.9089	0	0
NC_006090.4	27068149	27068263	NC_006090.4.1-90000000.110770	0.5254	0.40282	2.67986	14.4861	0	0.0120389
NC_006090.4	27083050	27083187	NC_006090.4.1-90000000.110835	0.458	0.36472	2.62959	12.6868	0	0.0233309
NC_006090.4	27483387	27483579	NC_006090.4.1-90000000.112882	0.33791	0.26119	2.60843	15.542	0	0.00604209
NC_006090.4	27698411	27698612	NC_006090.4.1-90000000.113896	0.34611	0.28103	2.27519	11.7553	0	0.0334751
NC_006090.4	27913513	27913704	NC_006090.4.1-90000000.115097	0.36211	0.28013	2.59215	15.9939	0	0.00529183
NC_006090.4	28507537	28507685	NC_006090.4.1-90000000.117182	0.40724	0.28102	3.49771	24.695	0	0
NC_006090.4	28881137	28881529	NC_006090.4.1-90000000.118483	0.22693	0.18524	2.23198	14.7638	0	0.00998135
NC_006090.4	29133851	29133982	NC_006090.4.1-90000000.119407	0.56439	0.44144	2.5748	15.9627	0	0.00529183
NC_006090.4	29824797	29824911	NC_006090.4.1-90000000.121795	0.42013	0.25946	4.43052	29.3279	0	0
NC_006090.4	29849110	29849558	NC_006090.4.1-90000000.121888	0.29005	0.225	2.56763	30.7578	0	0
NC_006090.4	29900662	29900853	NC_006090.4.1-90000000.122111	0.39367	0.31785	2.40244	13.2952	0	0.016492
NC_006090.4	29922112	29922512	NC_006090.4.1-90000000.122235	0.21049	0.17085	2.25299	14.2259	0	0.0120389
NC_006090.4	30005325	30005481	NC_006090.4.1-90000000.122753	0.32513	0.24421	2.82296	14.9101	0	0.00667579
NC_006090.4	30007655	30007854	NC_006090.4.1-90000000.122771	0.20655	0.13925	3.64904	19.435	0	0
NC_006090.4	30162378	30162510	NC_006090.4.1-90000000.123728	0.4031	0.27133	3.66959	24.4235	0	0
NC_006090.4	30516843	30516952	NC_006090.4.1-90000000.125987	0.44753	0.34776	2.72365	11.8357	0	0.031507
NC_006090.4	30530723	30531064	NC_006090.4.1-90000000.126080	0.30663	0.2546	2.10533	14.5136	0	0.0117396
NC_006090.4	30577032	30577187	NC_006090.4.1-90000000.126423	0.5019	0.40036	2.30463	13.232	0	0.0169766
NC_006090.4	30605721	30605894	NC_006090.4.1-90000000.126658	0.43944	0.35989	2.20014	11.4595	0	0.038365
NC_006090.4	30634701	30634829	NC_006090.4.1-90000000.126839	0.47115	0.35148	2.84708	17.6721	0	0.00137049
NC_006090.4	30771352	30771502	NC_006090.4.1-90000000.127834	0.3612	0.27224	3.2465	16.7206	0	0.00529183
NC_006090.4	30780995	30781178	NC_006090.4.1-90000000.127920	0.3862	0.31188	2.29942	12.5846	0	0.0250665
NC_006090.4	30980466	30980645	NC_006090.4.1-90000000.129341	0.35526	0.26912	2.73622	17.7822	0	0.00137049
NC_006090.4	31323626	31323957	NC_006090.4.1-90000000.131237	0.37145	0.31488	1.96578	13.2942	0	0.016492
NC_006090.4	31398775	31398892	NC_006090.4.1-90000000.131488	0.39415	0.29067	2.97944	14.5868	0	0.00998135
NC_006090.4	31854223	31854377	NC_006090.4.1-90000000.133023	0.30317	0.23325	2.63689	11.152	0	0.0438115
NC_006090.4	31927428	31927557	NC_006090.4.1-90000000.133394	0.36541	0.27809	2.70553	12.5943	0	0.0250665
NC_006090.4	32034016	32034126	NC_006090.4.1-90000000.133845	0.23425	0.15174	3.96274	14.0123	0	0.013461
NC_006090.4	32818517	32818665	NC_006090.4.1-90000000.136491	0.48264	0.34489	3.25853	25.7686	0	0
NC_006090.4	32922938	32923058	NC_006090.4.1-90000000.136812	0.52532	0.41218	2.63441	13.5577	0	0.015854
NC_006090.4	33041374	33041519	NC_006090.4.1-90000000.137092	0.55242	0.44851	2.24311	12.5863	0	0.0250665
NC_006090.4	33593330	33593433	NC_006090.4.1-90000000.138641	0.4541	0.33744	3.27059	14.9064	0	0.00667579
NC_006090.4	33596562	33596688	NC_006090.4.1-90000000.138660	0.42303	0.31258	2.99988	16.5132	0	0.00529183
NC_006090.4	33640139	33640470	NC_006090.4.1-90000000.138844	0.11971	0.07611	4.0968	23.8904	0	0
NC_006090.4	33768677	33768818	NC_006090.4.1-90000000.139223	0.42957	0.31815	2.9949	18.6415	0	0
NC_006090.4	34228791	34229047	NC_006090.4.1-90000000.140599	0.22519	0.17556	2.53314	12.9417	0	0.0193234
NC_006090.4	36365158	36365270	NC_006090.4.1-90000000.148035	0.46707	0.3508	2.81836	13.3294	0	0.015854
NC_006090.4	36750903	36751104	NC_006090.4.1-90000000.149073	0.39637	0.3225	2.24775	12.8727	0	0.0198822
NC_006090.4	37675904	37676064	NC_006090.4.1-90000000.150699	0.5093	0.42219	2.26679	12.156	0	0.0280475
NC_006090.4	39236186	39236344	NC_006090.4.1-90000000.157235	0.35114	0.2754	2.50914	11.0354	0	0.048906
NC_006090.4	40484806	40484977	NC_006090.4.1-90000000.162746	0.36234	0.27931	2.58617	14.1861	0	0.0120389
NC_006090.4	41376875	41377042	NC_006090.4.1-90000000.166590	0.46157	0.35159	2.68621	19.2562	0	0
NC_006090.4	41713836	41713987	NC_006090.4.1-90000000.167666	0.4686	0.35043	2.84513	19.9963	0	0
NC_006090.4	41743556	41743739	NC_006090.4.1-90000000.167782	0.39891	0.31955	2.33499	13.3613	0	0.015854
NC_006090.4	41883914	41884182	NC_006090.4.1-90000000.168372	0.33054	0.26716	2.27513	15.0567	0	0.00667579
NC_006090.4	42437062	42437189	NC_006090.4.1-90000000.170466	0.39127	0.30389	2.6276	11.267	0	0.0413202
NC_006090.4	42450270	42450504	NC_006090.4.1-90000000.170522	0.42298	0.35288	2.08825	12.517	0	0.025365
NC_006090.4	43116410	43116595	NC_006090.4.1-90000000.172524	0.42096	0.34513	2.1858	11.8055	0	0.0331198
NC_006090.4	43237040	43237424	NC_006090.4.1-90000000.173064	0.31683	0.27282	1.86378	11.765	0	0.0334751
NC_006090.4	43245632	43245991	NC_006090.4.1-90000000.173108	0.32011	0.25874	2.27637	19.6247	0	0
NC_006090.4	43577944	43578059	NC_006090.4.1-90000000.174111	0.52113	0.40317	2.59552	13.8993	0	0.0138965
NC_006090.4	43632075	43632198	NC_006090.4.1-90000000.174252	0.54625	0.42242	2.6197	14.4212	0	0.0120389
NC_006090.4	43738086	43738222	NC_006090.4.1-90000000.174564	0.53747	0.41186	2.63274	17.5053	0	0.00257932
NC_006090.4	43782308	43782421	NC_006090.4.1-90000000.174685	0.49529	0.38574	2.5403	12.4455	0	0.025365
NC_006090.4	43974321	43974678	NC_006090.4.1-90000000.175523	0.31955	0.27439	1.88571	11.0313	0	0.048906
NC_006090.4	44009967	44010200	NC_006090.4.1-90000000.175689	0.29573	0.23662	2.37929	12.886	0	0.0198822
NC_006090.4	44132913	44133014	NC_006090.4.1-90000000.176319	0.31935	0.22015	3.5225	13.9152	0	0.0138965
NC_006090.4	44504929	44505089	NC_006090.4.1-90000000.177633	0.39209	0.31626	2.47664	12.0617	0	0.029537
NC_006090.4	46696584	46696725	NC_006090.4.1-90000000.184273	0.45842	0.35814	2.46634	13.0244	0	0.0193234
NC_006090.4	47408892	47408993	NC_006090.4.1-90000000.186442	0.5606	0.40156	3.3369	19.8091	0	0
NC_006090.4	48098607	48098815	NC_006090.4.1-90000000.189216	0.39976	0.3295	2.17571	12.1547	0	0.0280475
NC_006090.4	48103774	48103976	NC_006090.4.1-90000000.189246	0.40235	0.33129	2.19788	12.0615	0	0.029537
NC_006090.4	49260230	49260386	NC_006090.4.1-90000000.193353	0.34604	0.26297	2.76491	13.9079	0	0.0138965
NC_006090.4	49705610	49705729	NC_006090.4.1-90000000.194703	0.41328	0.31399	2.69905	12.7745	0	0.0222074
NC_006090.4	50899009	50899187	NC_006090.4.1-90000000.198514	0.46543	0.38218	2.1769	12.2214	0	0.0268987
NC_006090.4	50990509	50990728	NC_006090.4.1-90000000.198957	0.4528	0.38139	2.00203	11.0686	0	0.0466281
NC_006090.4	51031217	51031528	NC_006090.4.1-90000000.199239	0.36893	0.31497	1.92485	11.7445	0	0.0339651
NC_006090.4	51156000	51156199	NC_006090.4.1-90000000.199951	0.25107	0.17537	3.34502	19.6694	0	0
NC_006090.4	51156214	51156369	NC_006090.4.1-90000000.199953	0.25342	0.18511	2.97938	11.8249	0	0.0320494
NC_006090.4	51208782	51209145	NC_006090.4.1-90000000.200304	0.15741	0.12273	2.52961	13.0287	0	0.0189173
NC_006090.4	51268031	51268297	NC_006090.4.1-90000000.200748	0.25658	0.20107	2.50536	14.6144	0	0.00998135
NC_006090.4	51543873	51544001	NC_006090.4.1-90000000.202375	0.49359	0.38327	2.63585	14.246	0	0.0120389
NC_006090.4	51563419	51563533	NC_006090.4.1-90000000.202492	0.48032	0.37805	2.48	11.6753	0	0.0348432
NC_006090.4	51613663	51613926	NC_006090.4.1-90000000.202802	0.32001	0.24572	2.6598	21.5656	0	0
NC_006090.4	52780269	52780376	NC_006090.4.1-90000000.207505	0.54182	0.41416	2.65188	14.0546	0	0.0127202
NC_006090.4	52794656	52794767	NC_006090.4.1-90000000.207570	0.41414	0.30798	2.87471	12.8464	0	0.0204559
NC_006090.4	52868340	52868489	NC_006090.4.1-90000000.208014	0.31483	0.23384	2.86907	13.709	0	0.0152815
NC_006090.4	52917053	52917320	NC_006090.4.1-90000000.208370	0.28575	0.23575	2.14981	11.3487	0	0.0401207
NC_006090.4	52920349	52920501	NC_006090.4.1-90000000.208399	0.46771	0.36422	2.56407	15.4855	0	0.00604209
NC_006090.4	53637622	53637775	NC_006090.4.1-90000000.210603	0.3354	0.25664	2.6637	12.9963	0	0.0193234
NC_006090.4	53755840	53756010	NC_006090.4.1-90000000.210949	0.45423	0.36051	2.40871	15.2393	0	0.00604209
NC_006090.4	53851725	53851994	NC_006090.4.1-90000000.211316	0.41496	0.33618	2.29843	18.7034	0	0
NC_006090.4	54104075	54104221	NC_006090.4.1-90000000.212690	0.35596	0.25031	3.29042	20.2248	0	0
NC_006090.4	54111326	54111532	NC_006090.4.1-90000000.212745	0.43553	0.36584	2.20224	12.0313	0	0.0298894
NC_006090.4	54128890	54129098	NC_006090.4.1-90000000.212855	0.43522	0.36484	2.21836	12.2236	0	0.0268987
NC_006090.4	54183320	54183423	NC_006090.4.1-90000000.213148	0.50511	0.38319	2.75768	13.5576	0	0.015854
NC_006090.4	54303440	54303605	NC_006090.4.1-90000000.213635	0.42608	0.28812	3.97571	36.1321	0	0
NC_006090.4	54307612	54307843	NC_006090.4.1-90000000.213644	0.15993	0.11087	3.41253	16.0124	0	0.00529183
NC_006090.4	54532610	54532710	NC_006090.4.1-90000000.214617	0.38802	0.26967	3.40169	16.1866	0	0.00529183
NC_006090.4	56470908	56471011	NC_006090.4.1-90000000.222140	0.39678	0.28838	3.04431	13.3902	0	0.015854
NC_006090.4	56552276	56552791	NC_006090.4.1-90000000.222549	0.22634	0.19135	1.98976	13.6584	0	0.015854
NC_006090.4	56591963	56592290	NC_006090.4.1-90000000.222725	0.40774	0.3359	2.18332	19.2401	0	0
NC_006090.4	56807211	56807329	NC_006090.4.1-90000000.223525	0.43624	0.31888	2.99603	16.1155	0	0.00529183
NC_006090.4	56888714	56888959	NC_006090.4.1-90000000.223919	0.41956	0.33375	2.39207	19.8261	0	0
NC_006090.4	56934667	56934784	NC_006090.4.1-90000000.224180	0.32235	0.23064	3.18005	13.1795	0	0.0169766
NC_006090.4	57811676	57811799	NC_006090.4.1-90000000.226891	0.44149	0.27324	3.95793	25.3397	0	0
NC_006090.4	57902974	57903121	NC_006090.4.1-90000000.227165	0.53405	0.4046	2.69517	18.7926	0	0
NC_006090.4	57922427	57922573	NC_006090.4.1-90000000.227215	0.50032	0.40828	2.24144	11.1474	0	0.0438115
NC_006090.4	58946037	58946304	NC_006090.4.1-90000000.230312	0.25726	0.20693	2.31621	12.3062	0	0.0268987
NC_006090.4	58952028	58952159	NC_006090.4.1-90000000.230331	0.46118	0.30858	3.75883	30.0186	0	0
NC_006090.4	59478802	59479067	NC_006090.4.1-90000000.232478	0.35267	0.25254	3.15851	33.5549	0	0
NC_006090.4	59519972	59520264	NC_006090.4.1-90000000.232665	0.21725	0.16387	2.7747	18.2164	0	0
NC_006090.4	59656284	59656402	NC_006090.4.1-90000000.233243	0.59411	0.43803	2.75142	16.4074	0	0.00529183
NC_006090.4	59784949	59785079	NC_006090.4.1-90000000.233769	0.43537	0.34259	2.61203	12.3251	0	0.0268336
NC_006090.4	59790869	59791026	NC_006090.4.1-90000000.233797	0.43037	0.3438	2.52035	13.4861	0	0.015854
NC_006090.4	60302716	60302820	NC_006090.4.1-90000000.235901	0.37402	0.27172	3.13002	12.9815	0	0.0193234
NC_006090.4	60589587	60589720	NC_006090.4.1-90000000.236566	0.33838	0.25012	2.91533	14.3611	0	0.0120389
NC_006090.4	60639722	60639834	NC_006090.4.1-90000000.236721	0.45992	0.35147	2.68803	12.6366	0	0.0233309
NC_006090.4	60861257	60861425	NC_006090.4.1-90000000.237456	0.32702	0.24926	2.68845	13.9952	0	0.013461
NC_006090.4	60876862	60877030	NC_006090.4.1-90000000.237523	0.32702	0.24926	2.68845	13.9952	0	0.013461
NC_006090.4	60901780	60901916	NC_006090.4.1-90000000.237628	0.587	0.46274	2.47059	15.9764	0	0.00529183
NC_006090.4	60968154	60968335	NC_006090.4.1-90000000.237921	0.45164	0.35662	2.50414	16.6004	0	0.00529183
NC_006090.4	61100572	61100798	NC_006090.4.1-90000000.238327	0.39563	0.291	2.98616	28.2696	0	0
NC_006090.4	61610186	61610308	NC_006090.4.1-90000000.240062	0.40865	0.3004	2.97494	16.3815	0	0.00529183
NC_006090.4	61819280	61819384	NC_006090.4.1-90000000.240891	0.42968	0.28709	3.72055	21.3948	0	0
NC_006090.4	61955223	61955413	NC_006090.4.1-90000000.241635	0.45968	0.37052	2.31037	14.5844	0	0.00998135
NC_006090.4	62436986	62437135	NC_006090.4.1-90000000.242794	0.53781	0.40573	2.7549	20.1596	0	0
NC_006090.4	63161024	63161147	NC_006090.4.1-90000000.245156	0.47487	0.32733	3.49031	24.9314	0	0
NC_006090.4	63519114	63519217	NC_006090.4.1-90000000.246578	0.63834	0.51412	2.54112	12.0222	0	0.0298894
NC_006090.4	63591114	63591285	NC_006090.4.1-90000000.246808	0.54062	0.45469	2.09937	11.2895	0	0.0409955
NC_006090.4	64850360	64850647	NC_006090.4.1-90000000.250701	0.24199	0.1939	2.34766	12.7117	0	0.0228238
NC_006090.4	64877255	64877358	NC_006090.4.1-90000000.250832	0.38539	0.26414	3.48995	16.7004	0	0.00529183
NC_006090.4	64936235	64936378	NC_006090.4.1-90000000.251104	0.44619	0.35551	2.37151	11.8472	0	0.031507
NC_006090.4	64958153	64958451	NC_006090.4.1-90000000.251169	0.35158	0.29723	1.98718	11.9392	0	0.031249
NC_006090.4	65237153	65237337	NC_006090.4.1-90000000.252141	0.49081	0.35993	3.02275	29.3744	0	0
NC_006090.4	65241718	65241856	NC_006090.4.1-90000000.252165	0.50282	0.39581	2.42941	13.5777	0	0.015854
NC_006090.4	65528182	65528419	NC_006090.4.1-90000000.252892	0.32413	0.25694	2.48631	16.1659	0	0.00529183
NC_006090.4	65649093	65649218	NC_006090.4.1-90000000.253249	0.53946	0.41436	2.75245	16.1987	0	0.00529183
NC_006090.4	65959271	65959533	NC_006090.4.1-90000000.254378	0.37534	0.29932	2.37129	18.4789	0	0
NC_006090.4	66339883	66340226	NC_006090.4.1-90000000.256020	0.38842	0.28919	2.65606	30.2869	0	0
NC_006090.4	69121672	69121869	NC_006090.4.1-90000000.267471	0.45088	0.36618	2.32248	14.8706	0	0.00667579
NC_006090.4	69576735	69576853	NC_006090.4.1-90000000.269045	0.57534	0.45805	2.38986	12.3713	0	0.0263269
NC_006090.4	69614767	69614983	NC_006090.4.1-90000000.269171	0.46815	0.37082	2.43845	19.5024	0	0
NC_006090.4	70383772	70383915	NC_006090.4.1-90000000.270293	0.58038	0.46477	2.36913	14.7759	0	0.00941222
NC_006090.4	71227609	71227750	NC_006090.4.1-90000000.272343	0.33238	0.2493	2.82965	13.1892	0	0.0169766
NC_006090.4	71252277	71252404	NC_006090.4.1-90000000.272441	0.47434	0.36891	2.56111	12.3479	0	0.0263269
NC_006090.4	71282398	71282569	NC_006090.4.1-90000000.272550	0.45622	0.33833	2.76327	18.3817	0	0
NC_006090.4	71806315	71806594	NC_006090.4.1-90000000.274133	0.38455	0.31623	2.16507	16.0274	0	0.00529183
NC_006090.4	71895904	71896017	NC_006090.4.1-90000000.274596	0.31352	0.21825	3.20042	12.5985	0	0.0250665
NC_006090.4	72045947	72046141	NC_006090.4.1-90000000.275179	0.40297	0.32062	2.38508	15.4054	0	0.00604209
NC_006090.4	72108950	72109107	NC_006090.4.1-90000000.275478	0.3547	0.27582	2.48568	11.2763	0	0.0413202
NC_006090.4	72255591	72255736	NC_006090.4.1-90000000.276189	0.31828	0.23928	2.79505	12.692	0	0.0228238
NC_006090.4	72507091	72507202	NC_006090.4.1-90000000.277247	0.50269	0.37258	2.89895	12.0631	0	0.029537
NC_006090.4	72600282	72600463	NC_006090.4.1-90000000.277619	0.49677	0.39304	2.3937	13.6446	0	0.015854
NC_006090.4	72637857	72638014	NC_006090.4.1-90000000.277723	0.37203	0.29	2.55999	12.1767	0	0.0268987
NC_006090.4	73187643	73187796	NC_006090.4.1-90000000.279405	0.39807	0.29178	2.96456	18.7921	0	0
NC_006090.4	73238160	73238269	NC_006090.4.1-90000000.279502	0.45207	0.32614	3.01096	14.8709	0	0.00667579
NC_006090.4	73565695	73565807	NC_006090.4.1-90000000.280248	0.54431	0.40708	2.96642	17.1566	0	0.00257932
NC_006090.4	73666795	73666961	NC_006090.4.1-90000000.280362	0.47607	0.37464	2.50106	16.7142	0	0.00529183
NC_006090.4	73832752	73832854	NC_006090.4.1-90000000.280763	0.40721	0.3087	2.75809	11.255	0	0.0417833
NC_006090.4	73866243	73866416	NC_006090.4.1-90000000.280854	0.37733	0.29609	2.50828	14.2481	0	0.0120389
NC_006090.4	73994164	73994271	NC_006090.4.1-90000000.281228	0.45243	0.34318	2.68088	11.657	0	0.035929
NC_006090.4	74976731	74976941	NC_006090.4.1-90000000.284230	0.45237	0.36951	2.21714	15.0427	0	0.00667579
NC_006090.4	75045303	75045505	NC_006090.4.1-90000000.284412	0.3783	0.29665	2.50466	16.4358	0	0.00529183
NC_006090.4	75301153	75301338	NC_006090.4.1-90000000.285650	0.47519	0.37113	2.51036	18.318	0	0
NC_006090.4	75313122	75313234	NC_006090.4.1-90000000.285707	0.33363	0.24421	3.06877	11.9855	0	0.0302964
NC_006090.4	76219888	76220021	NC_006090.4.1-90000000.289474	0.3834	0.27739	3.1411	17.1406	0	0.00257932
NC_006090.4	76439654	76439838	NC_006090.4.1-90000000.290575	0.35436	0.26625	2.83758	18.9037	0	0
NC_006090.4	77368652	77368789	NC_006090.4.1-90000000.294059	0.53705	0.41211	2.55934	16.2276	0	0.00529183
NC_006090.4	77396706	77396978	NC_006090.4.1-90000000.294187	0.24688	0.18389	2.85616	20.1115	0	0
NC_006090.4	77505081	77505194	NC_006090.4.1-90000000.294748	0.26863	0.1752	3.75844	14.2326	0	0.0120389
NC_006090.4	77507240	77507477	NC_006090.4.1-90000000.294764	0.44476	0.36232	2.23465	16.3864	0	0.00529183
NC_006090.4	77553361	77553520	NC_006090.4.1-90000000.295021	0.37324	0.29395	2.45926	12.5403	0	0.025365
NC_006090.4	77583122	77583241	NC_006090.4.1-90000000.295199	0.27707	0.20154	3.0388	11.0704	0	0.0466281
NC_006090.4	77702515	77702650	NC_006090.4.1-90000000.295838	0.35079	0.2574	2.98508	14.9007	0	0.00667579
NC_006090.4	77718675	77718796	NC_006090.4.1-90000000.295924	0.44995	0.35296	2.46642	11.2667	0	0.0413202
NC_006090.4	77737329	77737572	NC_006090.4.1-90000000.296051	0.34066	0.27123	2.40505	15.5396	0	0.00604209
NC_006090.4	77944032	77944252	NC_006090.4.1-90000000.296619	0.29086	0.20915	3.11423	22.2893	0	0
NC_006090.4	78480595	78480775	NC_006090.4.1-90000000.298535	0.27475	0.21357	2.55114	11.4136	0	0.0391986
NC_006090.4	78982310	78982682	NC_006090.4.1-90000000.300109	0.3763	0.316	2.03469	16.2331	0	0.00529183
NC_006090.4	79735890	79736019	NC_006090.4.1-90000000.302099	0.45567	0.36164	2.40672	11.8835	0	0.031507
NC_006090.4	79825531	79825696	NC_006090.4.1-90000000.302346	0.47326	0.37919	2.33762	14.3747	0	0.0120389
NC_006090.4	80259428	80259574	NC_006090.4.1-90000000.303411	0.50298	0.41613	2.33556	11.3253	0	0.0406108
NC_006090.4	81106974	81107211	NC_006090.4.1-90000000.305867	0.35038	0.23374	3.57102	35.1344	0	0
NC_006090.4	82632338	82632457	NC_006090.4.1-90000000.310449	0.4173	0.31711	2.59545	11.4164	0	0.0391986
NC_006090.4	83952007	83952171	NC_006090.4.1-90000000.314307	0.42785	0.33864	2.44146	13.655	0	0.015854
NC_006090.4	84009111	84009213	NC_006090.4.1-90000000.314506	0.60698	0.41969	3.12116	18.8367	0	0
NC_006090.4	85203047	85203217	NC_006090.4.1-90000000.316154	0.48713	0.3874	2.30409	13.7121	0	0.0152815
NC_006090.4	85382179	85382512	NC_006090.4.1-90000000.316411	0.27942	0.23037	2.07953	11.8653	0	0.031507
NC_006090.4	85831593	85831789	NC_006090.4.1-90000000.317100	0.32867	0.25639	2.42764	12.5795	0	0.0250665
NC_006090.4	86210993	86211123	NC_006090.4.1-90000000.317964	0.5023	0.38863	2.46496	12.5796	0	0.0250665
NC_006090.4	86580855	86581145	NC_006090.4.1-90000000.318602	0.44313	0.35184	2.31034	21.5585	0	0
NC_006090.4	86850876	86851157	NC_006090.4.1-90000000.319258	0.48604	0.4061	2.03597	16.374	0	0.00529183
NC_006090.4	86882712	86882966	NC_006090.4.1-90000000.319354	0.36678	0.30005	2.11849	11.8005	0	0.0331198
NC_006090.4	86916209	86916321	NC_006090.4.1-90000000.319443	0.5488	0.41674	2.61226	13.7511	0	0.0152815
NC_006090.4	86926722	86926893	NC_006090.4.1-90000000.319472	0.41421	0.32856	2.33266	12.3172	0	0.0268336
NC_006090.4	87711028	87711128	NC_006090.4.1-90000000.322125	0.46537	0.33985	3.01585	14.5683	0	0.00998135
NC_006090.4	87736733	87737164	NC_006090.4.1-90000000.322260	0.28724	0.24301	1.98327	13.7629	0	0.0152815
NC_006090.4	87794684	87794881	NC_006090.4.1-90000000.322527	0.37237	0.26577	3.23006	26.3116	0	0
NC_006090.4	87871485	87871612	NC_006090.4.1-90000000.322864	0.44319	0.31179	3.3607	22.4138	0	0
NC_006090.4	88432749	88432981	NC_006090.4.1-90000000.324365	0.27501	0.21088	2.70308	15.2758	0	0.00604209
NC_006090.4	88803231	88803548	NC_006090.4.1-90000000.325541	0.25151	0.19748	2.4939	17.1378	0	0.00257932
NC_006090.4	89434773	89434938	NC_006090.4.1-90000000.327664	0.4638	0.36074	2.5554	17.2414	0	0.00257932
NC_006090.4	89451670	89451974	NC_006090.4.1-90000000.327693	0.46597	0.37602	2.27771	23.8468	0	0
NC_006090.4	89713713	89713892	NC_006090.4.1-90000000.328614	0.44922	0.34499	2.64433	19.3233	0	0
NC_006090.4	89728963	89729117	NC_006090.4.1-90000000.328636	0.4564	0.35715	2.52145	14.2918	0	0.0120389
NC_006090.4	89869445	89869645	NC_006090.4.1-90000000.328896	0.42697	0.31458	3.05105	26.114	0	0
NC_006090.4	90022915	90023150	NC_006090.4.90000001-111302122.54	0.43953	0.36335	2.15359	14.5834	0	0.00998135
NC_006090.4	90098216	90098404	NC_006090.4.90000001-111302122.168	0.39282	0.29592	2.69654	17.8876	0	0.00137049
NC_006090.4	91117750	91117858	NC_006090.4.90000001-111302122.1693	0.53694	0.37507	3.66258	22.3793	0	0
NC_006090.4	91492990	91493231	NC_006090.4.90000001-111302122.3079	0.48255	0.40309	2.06408	14.3546	0	0.0120389
NC_006090.4	91608818	91608958	NC_006090.4.90000001-111302122.3444	0.55681	0.45335	2.27454	12.4885	0	0.025365
NC_006090.4	92677496	92677684	NC_006090.4.90000001-111302122.6384	0.4507	0.31245	3.50323	34.9083	0	0
NC_006090.4	93397824	93398191	NC_006090.4.90000001-111302122.7929	0.19276	0.12544	3.95381	38.6431	0	0
NC_006090.4	93601467	93601583	NC_006090.4.90000001-111302122.8752	0.47828	0.37168	2.56791	12.4383	0	0.0259477
NC_006090.4	93691349	93691539	NC_006090.4.90000001-111302122.9152	0.31138	0.24957	2.34648	11.2157	0	0.0426839
NC_006090.4	93737693	93738030	NC_006090.4.90000001-111302122.9291	0.29737	0.24976	2.03258	12.2088	0	0.0268987
NC_006090.4	93825268	93825380	NC_006090.4.90000001-111302122.9684	0.54852	0.41858	2.63387	13.8589	0	0.0138965
NC_006090.4	93831831	93832046	NC_006090.4.90000001-111302122.9714	0.32251	0.25918	2.32518	12.4374	0	0.0259477
NC_006090.4	93966866	93967209	NC_006090.4.90000001-111302122.10235	0.20212	0.1539	2.71486	18.4706	0	0
NC_006090.4	93986041	93986176	NC_006090.4.90000001-111302122.10272	0.49895	0.38747	2.57367	15.49	0	0.00604209
NC_006090.4	94546832	94547006	NC_006090.4.90000001-111302122.11629	0.39181	0.31032	2.34609	11.8112	0	0.0331198
NC_006090.4	94660324	94660449	NC_006090.4.90000001-111302122.11926	0.43303	0.32454	2.89193	16.448	0	0.00529183
NC_006090.4	95014152	95014323	NC_006090.4.90000001-111302122.13306	0.44061	0.31246	3.15865	26.0238	0	0
NC_006090.4	95016964	95017081	NC_006090.4.90000001-111302122.13320	0.41634	0.28476	3.52858	21.1774	0	0
NC_006090.4	95075454	95075565	NC_006090.4.90000001-111302122.13579	0.48018	0.35557	2.84222	14.5465	0	0.00998135
NC_006090.4	95114775	95115000	NC_006090.4.90000001-111302122.13742	0.511	0.38414	2.7729	28.9177	0	0
NC_006090.4	95129933	95130064	NC_006090.4.90000001-111302122.13782	0.41009	0.31567	2.56261	11.7914	0	0.0334751
NC_006090.4	95757660	95757777	NC_006090.4.90000001-111302122.15631	0.44104	0.30264	3.23494	17.6894	0	0.00137049
NC_006090.4	95827208	95827339	NC_006090.4.90000001-111302122.15892	0.51549	0.40308	2.40452	12.2775	0	0.0268987
NC_006090.4	95879847	95879959	NC_006090.4.90000001-111302122.16069	0.45761	0.33484	3.07832	15.6624	0	0.00529183
NC_006090.4	95973229	95973366	NC_006090.4.90000001-111302122.16411	0.33967	0.24044	3.26173	16.843	0	0.00374665
NC_006090.4	95975162	95975742	NC_006090.4.90000001-111302122.16416	0.21856	0.17826	2.2199	20.405	0	0
NC_006090.4	96053601	96053772	NC_006090.4.90000001-111302122.16826	0.39439	0.26882	3.54911	27.8271	0	0
NC_006090.4	96247682	96247814	NC_006090.4.90000001-111302122.18064	0.36959	0.27546	2.85051	14.1501	0	0.0120389
NC_006090.4	98031160	98031360	NC_006090.4.90000001-111302122.23750	0.3285	0.26137	2.32673	11.4551	0	0.038365
NC_006090.4	98305138	98305239	NC_006090.4.90000001-111302122.24876	0.46141	0.35194	2.68791	12.0616	0	0.029537
NC_006090.4	98328041	98328537	NC_006090.4.90000001-111302122.25032	0.14892	0.11294	2.73442	20.306	0	0
NC_006090.4	98749790	98749930	NC_006090.4.90000001-111302122.26152	0.40424	0.3165	2.50682	12.2229	0	0.0268987
NC_006090.4	98749936	98750113	NC_006090.4.90000001-111302122.26153	0.34544	0.27557	2.38475	11.8337	0	0.031507
NC_006090.4	99223106	99223229	NC_006090.4.90000001-111302122.27200	0.43235	0.32817	2.65763	11.9316	0	0.031249
NC_006090.4	99461546	99461900	NC_006090.4.90000001-111302122.27753	0.26603	0.20144	2.76182	26.0716	0	0
NC_006090.4	99619002	99619187	NC_006090.4.90000001-111302122.28273	0.26476	0.18401	3.39452	21.1665	0	0
NC_006090.4	99659481	99659645	NC_006090.4.90000001-111302122.28515	0.34843	0.27142	2.51634	12.2162	0	0.0268987
NC_006090.4	99804298	99804400	NC_006090.4.90000001-111302122.29032	0.57992	0.4405	2.71441	15.4352	0	0.00604209
NC_006090.4	100579487	100579647	NC_006090.4.90000001-111302122.31192	0.40996	0.31835	2.54628	14.4553	0	0.0120389
NC_006090.4	100583627	100583770	NC_006090.4.90000001-111302122.31213	0.41812	0.32852	2.61776	13.6809	0	0.015854
NC_006090.4	100766180	100766289	NC_006090.4.90000001-111302122.31823	0.4174	0.31241	2.86617	12.8573	0	0.0204559
NC_006090.4	100913095	100913207	NC_006090.4.90000001-111302122.32155	0.49747	0.37201	2.84169	14.9454	0	0.00667579
NC_006090.4	101102084	101102379	NC_006090.4.90000001-111302122.33078	0.31996	0.26703	2.08657	12.3748	0	0.0263269
NC_006090.4	101195351	101195578	NC_006090.4.90000001-111302122.33387	0.2616	0.18674	3.18354	22.2115	0	0
NC_006090.4	101198972	101199078	NC_006090.4.90000001-111302122.33398	0.20385	0.13517	3.79844	11.27	0	0.0413202
NC_006090.4	101210236	101210340	NC_006090.4.90000001-111302122.33440	0.36811	0.27306	2.90776	11.5943	0	0.037518
NC_006090.4	101340803	101341275	NC_006090.4.90000001-111302122.33938	0.19332	0.15858	2.18347	14.0148	0	0.013461
NC_006090.4	101441988	101442266	NC_006090.4.90000001-111302122.34312	0.25929	0.20873	2.24577	11.5828	0	0.037518
NC_006090.4	102460487	102460627	NC_006090.4.90000001-111302122.39069	0.42576	0.2979	3.37634	23.8095	0	0
NC_006090.4	102561640	102561841	NC_006090.4.90000001-111302122.39466	0.51057	0.35498	3.42899	41.536	0	0
NC_006090.4	102570173	102570315	NC_006090.4.90000001-111302122.39500	0.14304	0.09074	4.84143	13.4859	0	0.015854
NC_006090.4	102570317	102570421	NC_006090.4.90000001-111302122.39501	0.34706	0.25626	3.36359	12.9739	0	0.0193234
NC_006090.4	102602609	102602753	NC_006090.4.90000001-111302122.39627	0.39221	0.3051	2.56111	12.4108	0	0.0263269
NC_006090.4	102714891	102715122	NC_006090.4.90000001-111302122.40203	0.33635	0.25939	2.59729	18.6376	0	0
NC_006090.4	102793289	102793620	NC_006090.4.90000001-111302122.40563	0.26886	0.21829	2.25894	14.3413	0	0.0120389
NC_006090.4	102841769	102842097	NC_006090.4.90000001-111302122.40834	0.20658	0.16684	2.2855	11.5325	0	0.037518
NC_006090.4	102900000	102900128	NC_006090.4.90000001-111302122.41116	0.3224	0.21924	3.5754	18.4926	0	0
NC_006090.4	103245384	103245621	NC_006090.4.90000001-111302122.42315	0.41916	0.33697	2.32617	17.4134	0	0.00257932
NC_006090.4	103490091	103490342	NC_006090.4.90000001-111302122.43056	0.35783	0.29871	2.06526	11.5067	0	0.037518
NC_006090.4	103520673	103520902	NC_006090.4.90000001-111302122.43134	0.2726	0.21186	2.54999	14.0098	0	0.013461
NC_006090.4	103601953	103602314	NC_006090.4.90000001-111302122.43353	0.22114	0.17995	2.24615	13.4251	0	0.015854
NC_006090.4	103637878	103638069	NC_006090.4.90000001-111302122.43528	0.47661	0.40131	2.11744	11.41	0	0.0391986
NC_006090.4	103779139	103779358	NC_006090.4.90000001-111302122.44121	0.3478	0.262	2.77644	20.961	0	0
NC_006090.4	103779515	103779640	NC_006090.4.90000001-111302122.44123	0.45665	0.3346	2.99955	17.4404	0	0.00257932
NC_006090.4	103950966	103951145	NC_006090.4.90000001-111302122.44878	0.39789	0.31574	2.39797	13.7912	0	0.0146699
NC_006090.4	104048467	104048804	NC_006090.4.90000001-111302122.45445	0.27743	0.22273	2.33747	17.2143	0	0.00257932
NC_006090.4	104066582	104066789	NC_006090.4.90000001-111302122.45526	0.41388	0.26741	4.01763	44.7581	0	0
NC_006090.4	104146304	104146491	NC_006090.4.90000001-111302122.45926	0.34363	0.26804	2.52926	14.3123	0	0.0120389
NC_006090.4	104196385	104196514	NC_006090.4.90000001-111302122.46221	0.40995	0.3139	2.54371	11.4859	0	0.0380056
NC_006090.4	104287507	104287756	NC_006090.4.90000001-111302122.46811	0.34797	0.26364	2.7622	23.4695	0	0
NC_006090.4	104356345	104356608	NC_006090.4.90000001-111302122.47250	0.27335	0.21253	2.55445	16.5847	0	0.00529183
NC_006090.4	104689810	104689946	NC_006090.4.90000001-111302122.48816	0.44882	0.35489	2.46046	12.9551	0	0.0193234
NC_006090.4	106657428	106657548	NC_006090.4.90000001-111302122.54878	0.52398	0.40231	2.41573	11.4963	0	0.037518
NC_006090.4	106853658	106853782	NC_006090.4.90000001-111302122.55768	0.4659	0.33974	3.01586	18.6545	0	0
NC_006090.4	108188860	108189058	NC_006090.4.90000001-111302122.61329	0.18386	0.1331	3.06735	12.5532	0	0.0250665
NC_006090.4	108457416	108457520	NC_006090.4.90000001-111302122.62310	0.3329	0.24142	3.05458	11.4371	0	0.038365
NC_006090.4	108666141	108666270	NC_006090.4.90000001-111302122.63048	0.46222	0.33983	2.94575	17.9255	0	0.00137049
NC_006090.4	109410731	109410881	NC_006090.4.90000001-111302122.65392	0.38661	0.2637	3.58928	25.2048	0	0
NC_006090.4	109424690	109424862	NC_006090.4.90000001-111302122.65462	0.25262	0.18408	3.03292	14.9559	0	0.00667579
NC_006090.4	109513076	109513457	NC_006090.4.90000001-111302122.65936	0.16484	0.13185	2.34991	12.1061	0	0.0291028
NC_006091.4	1929127	1929354	NC_006091.4.4.8350	0.30875	0.23594	2.62916	15.5616	0	0.00604209
NC_006091.4	4416339	4416518	NC_006091.4.4.20773	0.19426	0.13836	3.31229	13.7738	0	0.0152815
NC_006091.4	4437117	4437464	NC_006091.4.4.20892	0.13915	0.10343	2.88701	14.8785	0	0.00667579
NC_006091.4	4554379	4554621	NC_006091.4.4.21464	0.2425	0.16622	3.52224	26.5578	0	0
NC_006091.4	5390459	5390880	NC_006091.4.4.26564	0.28089	0.24111	1.88638	11.4286	0	0.038365
NC_006091.4	5397519	5397637	NC_006091.4.4.26614	0.26316	0.17928	3.59208	13.4061	0	0.015854
NC_006091.4	6274203	6274389	NC_006091.4.4.29916	0.44975	0.37211	2.24004	12.724	0	0.0222074
NC_006091.4	6796669	6796810	NC_006091.4.4.32064	0.50797	0.38933	2.77168	17.7764	0	0.00137049
NC_006091.4	7312621	7312751	NC_006091.4.4.33793	0.42738	0.31027	3.08419	17.9196	0	0.00137049
NC_006091.4	7428934	7429088	NC_006091.4.4.34254	0.46704	0.36368	2.63187	16.2893	0	0.00529183
NC_006091.4	7898361	7898481	NC_006091.4.4.35876	0.50714	0.39362	2.82036	15.5099	0	0.00604209
NC_006091.4	8022103	8022298	NC_006091.4.4.36231	0.45718	0.34251	2.82464	25.0748	0	0
NC_006091.4	8046495	8046641	NC_006091.4.4.36327	0.27166	0.20295	2.8561	11.3152	0	0.0409955
NC_006091.4	8233031	8233193	NC_006091.4.4.36904	0.26294	0.19135	5.59773	24.8986	0	0
NC_006091.4	8270473	8270845	NC_006091.4.4.37055	0.14119	0.11144	2.44719	11.0349	0	0.048906
NC_006091.4	8300466	8300604	NC_006091.4.4.37152	0.46639	0.32751	3.2336	23.0465	0	0
NC_006091.4	8422721	8422934	NC_006091.4.4.37722	0.31682	0.22871	3.08493	23.1863	0	0
NC_006091.4	8679029	8679137	NC_006091.4.4.38516	0.30182	0.19376	4.32795	19.7529	0	0
NC_006091.4	9647783	9647940	NC_006091.4.4.42036	0.45384	0.36092	2.28636	11.6938	0	0.0348432
NC_006091.4	13537381	13537500	NC_006091.4.4.58640	0.23547	0.15347	3.90941	15.5841	0	0.00529183
NC_006091.4	13574825	13574933	NC_006091.4.4.58846	0.42724	0.31878	2.75836	11.5543	0	0.037518
NC_006091.4	13597255	13597537	NC_006091.4.4.58981	0.24875	0.19318	2.56543	15.8289	0	0.00529183
NC_006091.4	13602226	13602793	NC_006091.4.4.59010	0.2059	0.17459	1.96655	13.5247	0	0.015854
NC_006091.4	13617652	13618119	NC_006091.4.4.59087	0.19626	0.13811	3.2926	36.7436	0	0
NC_006091.4	13621290	13621453	NC_006091.4.4.59104	0.12838	0.07819	4.55916	14.1707	0	0.0120389
NC_006091.4	13621773	13621929	NC_006091.4.4.59111	0.38794	0.30333	2.51046	12.9341	0	0.0193234
NC_006091.4	13622667	13622838	NC_006091.4.4.59118	0.31487	0.23141	2.95739	17.1558	0	0.00257932
NC_006091.4	13630291	13630493	NC_006091.4.4.59151	0.35824	0.26875	2.87586	19.347	0	0
NC_006091.4	13643827	13644369	NC_006091.4.4.59219	0.11274	0.08895	2.44727	13.1126	0	0.0183368
NC_006091.4	13670039	13670151	NC_006091.4.4.59319	0.35823	0.26872	2.80775	11.2537	0	0.0417833
NC_006091.4	13873281	13873499	NC_006091.4.4.59971	0.44138	0.35779	2.35207	15.6895	0	0.00529183
NC_006091.4	13886036	13886251	NC_006091.4.4.60027	0.24501	0.15952	3.74985	23.3387	0	0
NC_006091.4	13890666	13890795	NC_006091.4.4.60056	0.38861	0.27877	3.08091	16.8273	0	0.00374665
NC_006091.4	14350491	14350703	NC_006091.4.4.62372	0.2665	0.20592	2.5984	13.519	0	0.015854
NC_006091.4	14434793	14434974	NC_006091.4.4.62703	0.43901	0.3601	2.44658	13.6179	0	0.015854
NC_006091.4	14479983	14480091	NC_006091.4.4.62952	0.50591	0.39571	2.52229	11.0828	0	0.046137
NC_006091.4	14506616	14506787	NC_006091.4.4.63107	0.29998	0.2274	2.74099	12.2599	0	0.0268987
NC_006091.4	14508847	14509009	NC_006091.4.4.63122	0.37837	0.29987	2.42805	12.1694	0	0.0280475
NC_006091.4	14525229	14525449	NC_006091.4.4.63204	0.46562	0.34087	3.02465	32.6839	0	0
NC_006091.4	14577164	14577305	NC_006091.4.4.63437	0.4111	0.29567	3.12222	19.8664	0	0
NC_006091.4	14616053	14616433	NC_006091.4.4.63641	0.2416	0.1997	2.1389	13.1669	0	0.0169766
NC_006091.4	14670439	14670586	NC_006091.4.4.63887	0.46815	0.36633	2.51698	14.8807	0	0.00667579
NC_006091.4	14807219	14807424	NC_006091.4.4.64382	0.47719	0.39191	2.15314	12.8422	0	0.0204559
NC_006091.4	14818015	14818245	NC_006091.4.4.64411	0.4055	0.29141	3.16704	32.8334	0	0
NC_006091.4	14896361	14896461	NC_006091.4.4.64633	0.561	0.41207	2.98608	16.6884	0	0.00529183
NC_006091.4	14968074	14968293	NC_006091.4.4.64838	0.41822	0.29505	3.30746	35.4147	0	0
NC_006091.4	15027095	15027268	NC_006091.4.4.65068	0.44031	0.32384	2.95898	23.4174	0	0
NC_006091.4	15095714	15095867	NC_006091.4.4.65328	0.41626	0.33469	2.67902	12.5625	0	0.0250665
NC_006091.4	15466849	15466975	NC_006091.4.4.66663	0.35333	0.26619	2.75161	11.6756	0	0.0348432
NC_006091.4	15587957	15588097	NC_006091.4.4.67400	0.35173	0.27129	2.70678	12.194	0	0.0268987
NC_006091.4	15891764	15892125	NC_006091.4.4.68584	0.28727	0.23064	2.33036	18.3377	0	0
NC_006091.4	16020650	16020850	NC_006091.4.4.69269	0.31305	0.22953	2.97612	19.533	0	0
NC_006091.4	16032849	16032955	NC_006091.4.4.69340	0.61735	0.4912	2.42566	11.8724	0	0.031507
NC_006091.4	16146089	16146322	NC_006091.4.4.69844	0.38103	0.31262	2.17835	13.5438	0	0.015854
NC_006091.4	16247524	16247703	NC_006091.4.4.70294	0.52021	0.4125	2.74617	20.7135	0	0
NC_006091.4	16259390	16259736	NC_006091.4.4.70348	0.4002	0.33235	2.11771	18.5236	0	0
NC_006091.4	16293747	16293893	NC_006091.4.4.70496	0.41345	0.30586	2.83073	16.1085	0	0.00529183
NC_006091.4	16877260	16877499	NC_006091.4.4.73160	0.35323	0.27958	2.4349	17.0043	0	0.00257932
NC_006091.4	17183330	17183588	NC_006091.4.4.74740	0.41411	0.35376	2.18071	13.1527	0	0.0169766
NC_006091.4	17201772	17202043	NC_006091.4.4.74842	0.29578	0.24363	2.17263	11.7461	0	0.0339651
NC_006091.4	17857661	17857922	NC_006091.4.4.77796	0.16079	0.11773	2.98553	13.6847	0	0.015854
NC_006091.4	17870930	17871405	NC_006091.4.4.77898	0.22016	0.18354	2.07704	14.003	0	0.013461
NC_006091.4	17986003	17986132	NC_006091.4.4.78683	0.35582	0.26897	2.76887	12.4882	0	0.025365
NC_006091.4	17986706	17986923	NC_006091.4.4.78691	0.40623	0.33345	2.19142	12.8392	0	0.0204559
NC_006091.4	18052244	18052362	NC_006091.4.4.79119	0.54359	0.43766	2.3126	11.0479	0	0.0484856
NC_006091.4	18093779	18094053	NC_006091.4.4.79317	0.33525	0.24373	3.0743	30.8647	0	0
NC_006091.4	18186396	18186927	NC_006091.4.4.79597	0.15357	0.11014	3.0469	27.1424	0	0
NC_006091.4	18289374	18289532	NC_006091.4.4.80194	0.38212	0.27562	3.01311	19.2843	0	0
NC_006091.4	18354864	18355078	NC_006091.4.4.80574	0.31381	0.25143	2.28142	11.0172	0	0.049937
NC_006091.4	18410707	18410977	NC_006091.4.4.80874	0.29218	0.23335	2.30164	13.4159	0	0.015854
NC_006091.4	18426815	18427079	NC_006091.4.4.80965	0.32664	0.26109	2.29189	13.4844	0	0.015854
NC_006091.4	18548947	18549148	NC_006091.4.4.81623	0.29985	0.22936	2.60375	14.3938	0	0.0120389
NC_006091.4	18644533	18644960	NC_006091.4.4.82127	0.2786	0.23578	1.93604	12.1315	0	0.0291028
NC_006091.4	20048129	20048425	NC_006091.4.4.84083	0.34978	0.29417	1.98463	11.4957	0	0.037518
NC_006091.4	20260658	20260833	NC_006091.4.4.84865	0.40445	0.28315	3.26204	25.1087	0	0
NC_006091.4	20891997	20892109	NC_006091.4.4.86881	0.52448	0.41814	2.42604	11.2901	0	0.0409955
NC_006091.4	21418149	21418315	NC_006091.4.4.88147	0.39799	0.30933	2.55424	14.7937	0	0.00941222
NC_006091.4	21525102	21525236	NC_006091.4.4.88523	0.45257	0.34542	2.70368	15.9582	0	0.00529183
NC_006091.4	24311455	24311589	NC_006091.4.4.94735	0.43508	0.33802	2.56182	12.8836	0	0.0198822
NC_006091.4	24441256	24441380	NC_006091.4.4.95092	0.43589	0.33452	2.6266	12.87	0	0.0198822
NC_006091.4	24660592	24660697	NC_006091.4.4.95404	0.33702	0.24492	3.05291	11.7792	0	0.0334751
NC_006091.4	25808848	25809034	NC_006091.4.4.98160	0.4631	0.38311	2.11301	11.1164	0	0.0452923
NC_006091.4	25831908	25832128	NC_006091.4.4.98218	0.2433	0.14646	4.58742	32.2038	0	0
NC_006091.4	25834824	25834958	NC_006091.4.4.98239	0.48725	0.37211	2.65129	14.5679	0	0.00998135
NC_006091.4	25834967	25835094	NC_006091.4.4.98240	0.39629	0.2931	2.89498	14.0294	0	0.0127202
NC_006091.4	25845618	25845730	NC_006091.4.4.98300	0.51111	0.36313	3.29514	21.3711	0	0
NC_006091.4	25887150	25887301	NC_006091.4.4.98394	0.38693	0.25745	3.75856	25.2944	0	0
NC_006091.4	25907237	25907642	NC_006091.4.4.98444	0.35543	0.29989	1.98692	14.4517	0	0.0120389
NC_006091.4	25947661	25948076	NC_006091.4.4.98558	0.28333	0.24386	1.88003	11.1499	0	0.0438115
NC_006091.4	25950544	25950664	NC_006091.4.4.98566	0.52802	0.4192	2.54794	13.0257	0	0.0189173
NC_006091.4	26103612	26103802	NC_006091.4.4.99081	0.30014	0.22489	3.12468	17.998	0	0.00137049
NC_006091.4	26148875	26149079	NC_006091.4.4.99216	0.4774	0.37325	2.5527	21.6813	0	0
NC_006091.4	26234361	26234528	NC_006091.4.4.99458	0.46087	0.37688	2.1863	11.3839	0	0.0391986
NC_006091.4	26410929	26411103	NC_006091.4.4.99974	0.33252	0.24951	2.80319	16.1127	0	0.00529183
NC_006091.4	26425608	26425737	NC_006091.4.4.100014	0.40296	0.31058	2.61255	12.2914	0	0.0268987
NC_006091.4	26479963	26480345	NC_006091.4.4.100143	0.31018	0.25646	2.13415	16.2383	0	0.00529183
NC_006091.4	26493717	26493910	NC_006091.4.4.100164	0.25836	0.1944	2.78667	14.2909	0	0.0120389
NC_006091.4	26513633	26513755	NC_006091.4.4.100230	0.52664	0.41323	2.49446	12.5369	0	0.025365
NC_006091.4	26516985	26517087	NC_006091.4.4.100242	0.42508	0.28207	3.78787	19.2849	0	0
NC_006091.4	26533156	26533360	NC_006091.4.4.100288	0.54166	0.44697	2.13462	13.8697	0	0.0138965
NC_006091.4	26550405	26550562	NC_006091.4.4.100341	0.18639	0.1248	3.79627	14.8602	0	0.00758223
NC_006091.4	26553759	26553977	NC_006091.4.4.100357	0.3204	0.2564	2.34578	13.0478	0	0.0189173
NC_006091.4	26569633	26569913	NC_006091.4.4.100413	0.41219	0.33958	2.2594	17.241	0	0.00257932
NC_006091.4	26595266	26595530	NC_006091.4.4.100460	0.34437	0.26134	2.74543	22.9508	0	0
NC_006091.4	26601744	26601964	NC_006091.4.4.100482	0.36621	0.30247	2.13607	11.5625	0	0.037518
NC_006091.4	26607321	26607468	NC_006091.4.4.100499	0.48264	0.34819	3.15932	23.3061	0	0
NC_006091.4	26697767	26697881	NC_006091.4.4.100752	0.45395	0.35218	2.57913	12.0802	0	0.029537
NC_006091.4	26742490	26742590	NC_006091.4.4.100855	0.42924	0.29166	3.91159	20.6035	0	0
NC_006091.4	26742600	26742759	NC_006091.4.4.100856	0.46178	0.35609	2.64753	17.0864	0	0.00257932
NC_006091.4	26748089	26748280	NC_006091.4.4.100869	0.45894	0.3451	3.08262	28.0606	0	0
NC_006091.4	26751684	26751836	NC_006091.4.4.100878	0.42123	0.3271	2.56702	13.2599	0	0.016492
NC_006091.4	26771043	26771334	NC_006091.4.4.100945	0.31311	0.24721	2.44343	18.4937	0	0
NC_006091.4	26774783	26775004	NC_006091.4.4.100959	0.36709	0.24791	3.65158	36.6842	0	0
NC_006091.4	26828910	26829014	NC_006091.4.4.101144	0.52987	0.40345	2.63501	12.2576	0	0.0268987
NC_006091.4	26854831	26855079	NC_006091.4.4.101203	0.39184	0.29076	2.86988	27.9312	0	0
NC_006091.4	26913929	26914036	NC_006091.4.4.101404	0.40423	0.29382	3.1114	14.2061	0	0.0120389
NC_006091.4	26976142	26976266	NC_006091.4.4.101623	0.35387	0.26095	2.93473	13.31	0	0.015854
NC_006091.4	27140632	27141077	NC_006091.4.4.102348	0.16558	0.13205	2.37471	14.5362	0	0.00998135
NC_006091.4	27179629	27179762	NC_006091.4.4.102453	0.54867	0.3997	3.16065	23.7428	0	0
NC_006091.4	27190248	27190481	NC_006091.4.4.102489	0.39609	0.31993	2.2904	15.4461	0	0.00604209
NC_006091.4	27274310	27274448	NC_006091.4.4.102790	0.45899	0.36068	2.52271	13.5717	0	0.015854
NC_006091.4	27274455	27274636	NC_006091.4.4.102791	0.37093	0.25866	3.38281	25.9991	0	0
NC_006091.4	27277014	27277231	NC_006091.4.4.102803	0.44665	0.36324	2.26798	15.5963	0	0.00529183
NC_006091.4	27290754	27290885	NC_006091.4.4.102864	0.35801	0.26994	2.72845	12.0331	0	0.0298894
NC_006091.4	27346965	27347164	NC_006091.4.4.103114	0.39495	0.30252	2.64176	19.7866	0	0
NC_006091.4	27359281	27359515	NC_006091.4.4.103167	0.30601	0.23629	2.61072	17.4753	0	0.00257932
NC_006091.4	27440115	27440252	NC_006091.4.4.103390	0.49029	0.36503	3.00235	15.6147	0	0.00529183
NC_006091.4	27514474	27514674	NC_006091.4.4.103634	0.45696	0.37619	2.1621	12.9498	0	0.0193234
NC_006091.4	27553574	27553744	NC_006091.4.4.103772	0.49144	0.39323	2.58751	17.2542	0	0.00257932
NC_006091.4	27734243	27734455	NC_006091.4.4.104276	0.51088	0.38232	2.87993	30.7076	0	0
NC_006091.4	27742985	27743135	NC_006091.4.4.104307	0.4738	0.34002	3.06218	23.2529	0	0
NC_006091.4	27821205	27821349	NC_006091.4.4.104649	0.52455	0.40414	2.6299	18.6066	0	0
NC_006091.4	28255169	28255280	NC_006091.4.4.105951	0.39782	0.29336	2.95678	13.4493	0	0.015854
NC_006091.4	28379693	28379868	NC_006091.4.4.106248	0.40958	0.33521	2.1939	11.159	0	0.0438115
NC_006091.4	28458697	28458811	NC_006091.4.4.106483	0.53346	0.38567	3.09883	19.1038	0	0
NC_006091.4	28896233	28896418	NC_006091.4.4.107434	0.24837	0.18637	2.82184	13.7418	0	0.0152815
NC_006091.4	28928734	28928980	NC_006091.4.4.107577	0.30838	0.24083	2.52808	17.018	0	0.00257932
NC_006091.4	28950709	28950962	NC_006091.4.4.107697	0.37465	0.31204	2.19537	13.5629	0	0.015854
NC_006091.4	28956370	28956478	NC_006091.4.4.107721	0.53917	0.41992	2.55971	13.3394	0	0.015854
NC_006091.4	28983084	28983246	NC_006091.4.4.107834	0.45014	0.36197	2.3311	12.8991	0	0.0198822
NC_006091.4	29032605	29032766	NC_006091.4.4.108031	0.43812	0.33435	2.68982	18.3574	0	0
NC_006091.4	29032786	29032941	NC_006091.4.4.108032	0.32377	0.243	2.80216	14.1206	0	0.0127202
NC_006091.4	29036102	29036309	NC_006091.4.4.108038	0.35546	0.26848	3.00163	21.8628	0	0
NC_006091.4	29129387	29129515	NC_006091.4.4.108258	0.49326	0.35472	3.00265	19.1939	0	0
NC_006091.4	29170852	29171130	NC_006091.4.4.108433	0.20547	0.13681	3.72721	27.6512	0	0
NC_006091.4	29178563	29178698	NC_006091.4.4.108467	0.48896	0.37747	2.61624	15.134	0	0.00667579
NC_006091.4	29275254	29275511	NC_006091.4.4.108807	0.30831	0.24954	2.28905	13.7199	0	0.0152815
NC_006091.4	29284969	29285110	NC_006091.4.4.108840	0.27806	0.18596	3.74306	19.2125	0	0
NC_006091.4	29313339	29313511	NC_006091.4.4.108920	0.59327	0.45943	3.10414	23.56	0	0
NC_006091.4	29325901	29326020	NC_006091.4.4.108959	0.38225	0.28745	3.08488	13.8266	0	0.0138965
NC_006091.4	29330257	29330473	NC_006091.4.4.108979	0.38312	0.3155	2.15654	12.0242	0	0.0298894
NC_006091.4	29332591	29332733	NC_006091.4.4.108985	0.40221	0.28196	3.47751	20.0356	0	0
NC_006091.4	29334740	29335032	NC_006091.4.4.108992	0.2755	0.19821	3.19678	29.3357	0	0
NC_006091.4	29335041	29335232	NC_006091.4.4.108993	0.20108	0.13516	3.65952	18.6391	0	0
NC_006091.4	29358110	29358211	NC_006091.4.4.109095	0.46723	0.36833	3.15249	12.3005	0	0.0268987
NC_006091.4	29402618	29402821	NC_006091.4.4.109248	0.51443	0.3745	3.48152	37.8946	0	0
NC_006091.4	29407223	29407585	NC_006091.4.4.109277	0.33716	0.26868	3.42305	33.7307	0	0
NC_006091.4	29632785	29632953	NC_006091.4.4.110160	0.27974	0.20003	3.16078	16.8235	0	0.00374665
NC_006091.4	29827061	29827314	NC_006091.4.4.111271	0.34441	0.24698	3.09188	29.1004	0	0
NC_006091.4	30100221	30100351	NC_006091.4.4.112141	0.44731	0.34997	2.5368	12.8005	0	0.0217041
NC_006091.4	30613664	30613818	NC_006091.4.4.113486	0.48697	0.38795	2.48583	15.0381	0	0.00667579
NC_006091.4	30768076	30768190	NC_006091.4.4.114126	0.55203	0.40922	3.01328	15.363	0	0.00604209
NC_006091.4	30992647	30992884	NC_006091.4.4.114730	0.39018	0.30503	2.55607	20.3688	0	0
NC_006091.4	31242280	31242446	NC_006091.4.4.115858	0.50582	0.41774	2.14113	11.0753	0	0.046137
NC_006091.4	31608519	31608775	NC_006091.4.4.117465	0.51969	0.44949	1.83734	11.2317	0	0.0421582
NC_006091.4	31609429	31609548	NC_006091.4.4.117470	0.4799	0.34324	3.15419	19.8911	0	0
NC_006091.4	31888830	31888970	NC_006091.4.4.118545	0.38238	0.30105	2.46451	11.1039	0	0.045665
NC_006091.4	31989795	31989908	NC_006091.4.4.118890	0.62709	0.45918	3.55827	18.1408	0	0
NC_006091.4	32489558	32489673	NC_006091.4.4.120604	0.36252	0.26112	3.53905	15.4894	0	0.00604209
NC_006091.4	32785602	32785811	NC_006091.4.4.121980	0.38342	0.31295	2.22592	12.6922	0	0.0228238
NC_006091.4	33148260	33148557	NC_006091.4.4.123194	0.23301	0.19056	2.2106	11.0609	0	0.0475966
NC_006091.4	33150957	33151170	NC_006091.4.4.123216	0.3228	0.25503	2.44106	13.7645	0	0.0152815
NC_006091.4	33230999	33231176	NC_006091.4.4.123493	0.43794	0.32579	2.71566	20.0416	0	0
NC_006091.4	33883018	33883401	NC_006091.4.4.126004	0.21081	0.15678	2.78344	22.3397	0	0
NC_006091.4	34166600	34166830	NC_006091.4.4.127041	0.34867	0.2601	2.75112	20.7737	0	0
NC_006091.4	34524306	34524512	NC_006091.4.4.128638	0.47817	0.35595	2.86969	28.711	0	0
NC_006091.4	35954741	35954890	NC_006091.4.4.133133	0.4021	0.30177	2.80803	16.6973	0	0.00529183
NC_006091.4	36116765	36116950	NC_006091.4.4.133498	0.47562	0.3979	2.04794	11.0683	0	0.047139
NC_006091.4	37443466	37443750	NC_006091.4.4.136646	0.35522	0.27786	2.41798	19.2825	0	0
NC_006091.4	38110347	38110639	NC_006091.4.4.139146	0.28643	0.22911	2.36278	15.4711	0	0.00604209
NC_006091.4	38520427	38520558	NC_006091.4.4.140703	0.39167	0.30446	2.54847	12.17	0	0.0280475
NC_006091.4	39255753	39255989	NC_006091.4.4.143989	0.35568	0.26351	2.89812	24.8626	0	0
NC_006091.4	40142918	40143164	NC_006091.4.4.147231	0.35199	0.27589	2.5035	18.98	0	0
NC_006091.4	40234631	40234738	NC_006091.4.4.147644	0.35754	0.24451	3.59931	17.9346	0	0.00137049
NC_006091.4	40282059	40282173	NC_006091.4.4.147873	0.43814	0.32113	2.92339	13.9426	0	0.0138965
NC_006091.4	40339444	40339640	NC_006091.4.4.148187	0.38192	0.26626	3.48336	29.794	0	0
NC_006091.4	40540699	40540828	NC_006091.4.4.149252	0.41583	0.32287	2.59229	12.3377	0	0.0268336
NC_006091.4	40798439	40798599	NC_006091.4.4.150173	0.27326	0.2065	2.7574	11.8144	0	0.0325817
NC_006091.4	40831115	40831275	NC_006091.4.4.150283	0.41958	0.31954	2.71697	17.2763	0	0.00257932
NC_006091.4	40836044	40836166	NC_006091.4.4.150319	0.47109	0.37054	2.4935	11.677	0	0.0348432
NC_006091.4	40852600	40852800	NC_006091.4.4.150419	0.35483	0.28086	2.43536	13.4721	0	0.015854
NC_006091.4	40992577	40992746	NC_006091.4.4.150931	0.31919	0.23871	2.8541	15.4882	0	0.00604209
NC_006091.4	41230429	41230537	NC_006091.4.4.151594	0.52347	0.35413	3.64504	25.4225	0	0
NC_006091.4	41411023	41411220	NC_006091.4.4.151972	0.49566	0.41279	2.08895	12.1376	0	0.0291028
NC_006091.4	41411229	41411335	NC_006091.4.4.151973	0.33372	0.22269	3.77646	17.6387	0	0.00137049
NC_006091.4	41665036	41665224	NC_006091.4.4.152594	0.50485	0.41959	2.20903	13.3585	0	0.015854
NC_006091.4	41676776	41676897	NC_006091.4.4.152632	0.47588	0.36867	2.59814	13.2159	0	0.0169766
NC_006091.4	41692644	41692765	NC_006091.4.4.152703	0.49298	0.39175	2.41344	11.1391	0	0.0448666
NC_006091.4	41695073	41695195	NC_006091.4.4.152726	0.44292	0.34324	2.59499	12.2643	0	0.0268987
NC_006091.4	41833540	41833672	NC_006091.4.4.153069	0.50984	0.39668	2.50734	14.0357	0	0.0127202
NC_006091.4	42242655	42242793	NC_006091.4.4.154136	0.51321	0.39443	2.50571	14.363	0	0.0120389
NC_006091.4	42273062	42273204	NC_006091.4.4.154233	0.35309	0.26809	2.74941	13.2112	0	0.0169766
NC_006091.4	42285140	42285247	NC_006091.4.4.154274	0.44436	0.32352	3.10254	15.7065	0	0.00529183
NC_006091.4	42399943	42400054	NC_006091.4.4.154643	0.54743	0.40494	2.94413	18.2345	0	0
NC_006091.4	42831643	42831931	NC_006091.4.4.155821	0.40267	0.33585	2.02936	13.9159	0	0.0138965
NC_006091.4	42970215	42970525	NC_006091.4.4.156109	0.40905	0.29412	3.1806	45.1936	0	0
NC_006091.4	43397351	43397630	NC_006091.4.4.157126	0.34267	0.27336	2.3914	18.9119	0	0
NC_006091.4	43689384	43689796	NC_006091.4.4.158244	0.24705	0.19944	2.29182	17.4651	0	0.00257932
NC_006091.4	43877265	43877418	NC_006091.4.4.158991	0.29012	0.20856	3.07081	13.9708	0	0.013461
NC_006091.4	43968410	43968564	NC_006091.4.4.159301	0.42661	0.33644	2.4842	13.6703	0	0.015854
NC_006091.4	44460322	44460430	NC_006091.4.4.160106	0.58651	0.46258	2.48315	12.6331	0	0.0233309
NC_006091.4	44665439	44665574	NC_006091.4.4.160483	0.14329	0.0859	4.63644	13.768	0	0.0152815
NC_006091.4	44802563	44802700	NC_006091.4.4.160825	0.46089	0.36281	2.41941	11.7034	0	0.0348432
NC_006091.4	47858643	47859029	NC_006091.4.4.168324	0.42413	0.36654	1.77108	11.7642	0	0.0334751
NC_006091.4	49238998	49239115	NC_006091.4.4.172934	0.49891	0.36653	2.99197	18.739	0	0
NC_006091.4	51740874	51741147	NC_006091.4.4.180778	0.27669	0.21893	2.37492	13.968	0	0.013461
NC_006091.4	51752006	51752113	NC_006091.4.4.180834	0.58293	0.43259	2.9049	16.6001	0	0.00529183
NC_006091.4	51811341	51811467	NC_006091.4.4.181068	0.44878	0.32182	3.13791	19.2538	0	0
NC_006091.4	52195699	52195893	NC_006091.4.4.182463	0.37371	0.30256	2.26689	12.37	0	0.0263269
NC_006091.4	52298079	52298331	NC_006091.4.4.182877	0.31564	0.2402	2.69376	19.9838	0	0
NC_006091.4	53451617	53451791	NC_006091.4.4.188075	0.31657	0.23893	2.76535	14.6667	0	0.00998135
NC_006091.4	54823728	54823916	NC_006091.4.4.193336	0.37995	0.27769	3.01952	22.6653	0	0
NC_006091.4	54840711	54841042	NC_006091.4.4.193403	0.31575	0.25138	2.38216	20.1918	0	0
NC_006091.4	54903685	54903800	NC_006091.4.4.193611	0.44882	0.33301	2.87762	14.6253	0	0.00998135
NC_006091.4	54969135	54969375	NC_006091.4.4.193837	0.19589	0.14073	3.14438	16.785	0	0.00496012
NC_006091.4	55006625	55006728	NC_006091.4.4.194010	0.46228	0.29253	4.00878	23.2518	0	0
NC_006091.4	55039435	55039584	NC_006091.4.4.194143	0.4002	0.28374	3.22067	22.0733	0	0
NC_006091.4	55653821	55653991	NC_006091.4.4.196316	0.4039	0.32293	2.34103	11.691	0	0.0348432
NC_006091.4	55707893	55708037	NC_006091.4.4.196426	0.456	0.33944	2.75108	15.8827	0	0.00529183
NC_006091.4	55730565	55730712	NC_006091.4.4.196479	0.52525	0.40755	2.94429	19.4391	0	0
NC_006091.4	55923160	55923445	NC_006091.4.4.196828	0.37674	0.31709	2.01011	12.6957	0	0.0228238
NC_006091.4	57680296	57680451	NC_006091.4.4.201834	0.41712	0.33654	2.29925	11.1123	0	0.0452923
NC_006091.4	58107012	58107129	NC_006091.4.4.203691	0.43695	0.2924	3.76776	23.8165	0	0
NC_006091.4	58131999	58132243	NC_006091.4.4.203779	0.33561	0.26405	2.46184	17.0783	0	0.00257932
NC_006091.4	59296650	59296758	NC_006091.4.4.208630	0.45322	0.35136	2.57087	11.1405	0	0.0448666
NC_006091.4	59307463	59307607	NC_006091.4.4.208664	0.47762	0.36982	2.46902	11.0563	0	0.0480737
NC_006091.4	59313632	59313776	NC_006091.4.4.208679	0.47762	0.36982	2.46902	11.0563	0	0.0480737
NC_006091.4	59349317	59349718	NC_006091.4.4.208799	0.44535	0.391	1.75	13.0055	0	0.0193234
NC_006091.4	59415264	59415368	NC_006091.4.4.208976	0.42539	0.31193	2.97196	14.4305	0	0.0120389
NC_006091.4	61271957	61272176	NC_006091.4.4.215058	0.39371	0.30978	2.51575	18.8804	0	0
NC_006091.4	62231785	62231895	NC_006091.4.4.217483	0.48447	0.36981	2.70319	13.8423	0	0.0138965
NC_006091.4	62297167	62297319	NC_006091.4.4.217707	0.55628	0.44167	2.36612	15.299	0	0.00604209
NC_006091.4	63054807	63055147	NC_006091.4.4.219685	0.29975	0.24536	2.19217	15.7443	0	0.00529183
NC_006091.4	63669844	63669945	NC_006091.4.4.221788	0.4927	0.38307	2.53196	11.0899	0	0.045665
NC_006091.4	63791092	63791207	NC_006091.4.4.222062	0.53682	0.40505	2.59377	12.1857	0	0.0268987
NC_006091.4	64481578	64481707	NC_006091.4.4.223483	0.43733	0.30549	3.27451	18.0772	0	0.00137049
NC_006091.4	64795214	64795381	NC_006091.4.4.223980	0.38227	0.28588	2.94556	18.9136	0	0
NC_006091.4	65098919	65099032	NC_006091.4.4.225059	0.42296	0.3199	2.80916	12.8997	0	0.0198822
NC_006091.4	65510514	65510705	NC_006091.4.4.226228	0.22475	0.15756	3.34449	16.9854	0	0.00374665
NC_006091.4	66045496	66045648	NC_006091.4.4.228797	0.45371	0.36281	2.48227	13.8917	0	0.0138965
NC_006091.4	66258282	66258423	NC_006091.4.4.229719	0.29112	0.21185	3.04358	13.7073	0	0.0152815
NC_006091.4	66574290	66574417	NC_006091.4.4.230942	0.43431	0.26851	4.43384	35.0091	0	0
NC_006091.4	67105038	67105226	NC_006091.4.4.232391	0.25083	0.18283	3.01021	15.8259	0	0.00529183
NC_006091.4	67527180	67527284	NC_006091.4.4.233500	0.46249	0.33988	3.00109	15.0133	0	0.00667579
NC_006091.4	67572419	67572564	NC_006091.4.4.233621	0.32083	0.22693	3.43677	18.3824	0	0
NC_006091.4	67955621	67955747	NC_006091.4.4.234416	0.52421	0.42473	2.26213	11.0835	0	0.046137
NC_006091.4	68104119	68104275	NC_006091.4.4.234833	0.40103	0.32157	2.34235	11.6072	0	0.037518
NC_006091.4	68104919	68105079	NC_006091.4.4.234841	0.32464	0.25178	2.56933	11.6028	0	0.037518
NC_006091.4	68221904	68222004	NC_006091.4.4.235228	0.52385	0.39941	2.70204	13.2448	0	0.0169766
NC_006091.4	68599337	68599498	NC_006091.4.4.236163	0.2239	0.16255	3.04977	12.1174	0	0.0291028
NC_006091.4	68696563	68696730	NC_006091.4.4.236438	0.50588	0.36129	3.1454	26.9981	0	0
NC_006091.4	68857102	68857244	NC_006091.4.4.237112	0.33759	0.25296	2.8389	13.8504	0	0.0138965
NC_006091.4	68914732	68915093	NC_006091.4.4.237389	0.37296	0.31959	1.90599	12.8062	0	0.0217041
[truncated: 1,609 more rows]

## Sheet: Parrot
Chicken Chromosome	Start	End	Unique ID	Null Scale (neutral)	Alt Scale (accelerated)	Alt Subscale (Degree of Acceleration)	lnl-Ratio (Significance)	p-value	FDR q-value
NC_006088.4	1511733	1511858	NC_006088.4.1-90000000.4454	0.49677	0.38092	3.71832	17.7175	0	0.00179387
NC_006088.4	2552911	2553271	NC_006088.4.1-90000000.7966	0.20884	0.17178	3.20733	19.0275	0	0
NC_006088.4	2952649	2952784	NC_006088.4.1-90000000.9564	0.18309	0.13673	4.35482	11.0128	0	0.0452869
NC_006088.4	3834349	3834520	NC_006088.4.1-90000000.12860	0.16231	0.1174	4.80163	14.6934	0	0.00783237
NC_006088.4	3892826	3893041	NC_006088.4.1-90000000.13054	0.45849	0.38046	3.07414	20.7961	0	0
NC_006088.4	4293922	4294084	NC_006088.4.1-90000000.14508	0.29253	0.23316	3.60516	14.5901	0	0.00783237
NC_006088.4	4345695	4346359	NC_006088.4.1-90000000.14816	0.0987	0.07739	3.99368	24.7709	0	0
NC_006088.4	4412977	4413090	NC_006088.4.1-90000000.15214	0.31334	0.23433	4.64416	16.869	0	0.00179387
NC_006088.4	4451006	4451183	NC_006088.4.1-90000000.15489	0.1956	0.15548	3.64428	11.3684	0	0.0373116
NC_006088.4	4465284	4465461	NC_006088.4.1-90000000.15579	0.1956	0.15548	3.64428	11.3684	0	0.0373116
NC_006088.4	4513862	4514059	NC_006088.4.1-90000000.15846	0.31372	0.25208	3.56077	19.0568	0	0
NC_006088.4	4517325	4517629	NC_006088.4.1-90000000.15876	0.17181	0.14262	3.09779	12.3722	0	0.0236919
NC_006088.4	4760444	4760587	NC_006088.4.1-90000000.17085	0.40431	0.3225	3.61267	17.8947	0	0.00179387
NC_006088.4	5202048	5202255	NC_006088.4.1-90000000.18794	0.48322	0.42958	2.30464	10.8657	0	0.0498067
NC_006088.4	5212153	5212303	NC_006088.4.1-90000000.18840	0.11783	0.08289	5.36944	11.4029	0	0.0354766
NC_006088.4	5273599	5273705	NC_006088.4.1-90000000.19040	0.4128	0.32628	3.77986	14.8663	0	0.00679681
NC_006088.4	5314265	5314424	NC_006088.4.1-90000000.19187	0.23307	0.18599	3.6221	11.8753	0	0.0265878
NC_006088.4	5391078	5391265	NC_006088.4.1-90000000.19441	0.30122	0.24714	3.2746	14.9605	0	0.00552615
NC_006088.4	5475217	5475369	NC_006088.4.1-90000000.19802	0.42468	0.34311	3.29899	15.3121	0	0.00552615
NC_006088.4	5495044	5495442	NC_006088.4.1-90000000.19862	0.14949	0.12271	3.24827	15.1769	0	0.00552615
NC_006088.4	5547601	5548083	NC_006088.4.1-90000000.20054	0.18996	0.1678	2.53994	11.9758	0	0.0236919
NC_006088.4	5638051	5638297	NC_006088.4.1-90000000.20488	0.36079	0.3053	2.91583	17.5844	0	0.00179387
NC_006088.4	5671434	5671581	NC_006088.4.1-90000000.20643	0.5002	0.42546	2.68475	11.233	0	0.0392782
NC_006088.4	5729301	5729690	NC_006088.4.1-90000000.21022	0.22186	0.19437	2.46683	11.6885	0	0.0302473
NC_006088.4	5859165	5859454	NC_006088.4.1-90000000.21791	0.27498	0.23473	2.76887	14.2642	0	0.00990204
NC_006088.4	6046979	6047146	NC_006088.4.1-90000000.22980	0.24203	0.19303	3.62247	12.8187	0	0.0205848
NC_006088.4	6150952	6151109	NC_006088.4.1-90000000.23269	0.29611	0.24322	3.21236	12.0123	0	0.0236919
NC_006088.4	7018267	7018398	NC_006088.4.1-90000000.27245	0.40395	0.32939	3.32009	13.9418	0	0.0115681
NC_006088.4	7268280	7268410	NC_006088.4.1-90000000.28475	0.45433	0.37386	3.14877	13.3554	0	0.0144011
NC_006088.4	8071581	8071786	NC_006088.4.1-90000000.31187	0.36581	0.29668	3.41522	20.6508	0	0
NC_006088.4	8449949	8450124	NC_006088.4.1-90000000.32765	0.24504	0.19762	3.51459	12.8343	0	0.0205848
NC_006088.4	8638043	8638148	NC_006088.4.1-90000000.33529	0.32543	0.25628	3.90635	11.9728	0	0.0236919
NC_006088.4	8789311	8789533	NC_006088.4.1-90000000.34166	0.33011	0.27877	2.90515	14.7102	0	0.00783237
NC_006088.4	8859087	8859436	NC_006088.4.1-90000000.34597	0.35868	0.31861	2.32946	13.5772	0	0.0127473
NC_006088.4	11313835	11313940	NC_006088.4.1-90000000.42215	0.49346	0.39903	3.6035	15.1096	0	0.00552615
NC_006088.4	12229311	12229498	NC_006088.4.1-90000000.45242	0.38343	0.3146	3.28137	18.2455	0	0.00179387
NC_006088.4	12249029	12249177	NC_006088.4.1-90000000.45308	0.5445	0.46728	2.57712	11.5749	0	0.0313782
NC_006088.4	12371862	12371963	NC_006088.4.1-90000000.45751	0.25774	0.18669	4.94812	14.5122	0	0.00873001
NC_006088.4	13518360	13518466	NC_006088.4.1-90000000.49867	0.31894	0.24919	3.87964	12.3032	0	0.0236919
NC_006088.4	13795399	13795593	NC_006088.4.1-90000000.50939	0.37071	0.29924	3.64397	20.6974	0	0
NC_006088.4	14019879	14020497	NC_006088.4.1-90000000.51649	0.09382	0.07326	4.02917	21.1866	0	0
NC_006088.4	14513624	14513737	NC_006088.4.1-90000000.53561	0.44289	0.33291	4.41964	21.3296	0	0
NC_006088.4	15496941	15497128	NC_006088.4.1-90000000.57385	0.35878	0.2907	3.53817	18.9323	0	0
NC_006088.4	15627225	15627342	NC_006088.4.1-90000000.57720	0.3259	0.25262	4.42175	15.6708	0	0.00478024
NC_006088.4	16418500	16418644	NC_006088.4.1-90000000.60847	0.4194	0.35656	2.96291	11.9615	0	0.0236919
NC_006088.4	16463006	16463164	NC_006088.4.1-90000000.61032	0.40787	0.34863	2.7357	11.0729	0	0.0430282
NC_006088.4	16698363	16698635	NC_006088.4.1-90000000.61632	0.37534	0.32873	2.44385	13.4374	0	0.0135875
NC_006088.4	16793322	16793726	NC_006088.4.1-90000000.61808	0.33994	0.29456	2.59625	20.9425	0	0
NC_006088.4	16911053	16911366	NC_006088.4.1-90000000.62022	0.33551	0.29532	2.30348	11.9166	0	0.0236919
NC_006088.4	16967114	16967354	NC_006088.4.1-90000000.62160	0.2938	0.25312	2.64979	11.465	0	0.0314832
NC_006088.4	17173726	17173989	NC_006088.4.1-90000000.62750	0.22569	0.19	2.9161	12.2618	0	0.0236919
NC_006088.4	17230480	17230778	NC_006088.4.1-90000000.62992	0.39886	0.35751	2.20128	11.4759	0	0.0314832
NC_006088.4	17302057	17302212	NC_006088.4.1-90000000.63268	0.35315	0.29247	3.09919	12.286	0	0.0236919
NC_006088.4	17422651	17423098	NC_006088.4.1-90000000.63708	0.23343	0.20758	2.27155	11.2818	0	0.0385402
NC_006088.4	17939830	17939993	NC_006088.4.1-90000000.64705	0.48731	0.4154	2.80737	12.9032	0	0.0200656
NC_006088.4	18221532	18221827	NC_006088.4.1-90000000.65089	0.2691	0.23308	2.93077	13.8534	0	0.0125126
NC_006088.4	18613950	18614066	NC_006088.4.1-90000000.65709	0.41183	0.30636	5.83231	24.5024	0	0
NC_006088.4	18620548	18620663	NC_006088.4.1-90000000.65718	0.4157	0.30917	5.84859	24.5618	0	0
NC_006088.4	18838129	18839181	NC_006088.4.1-90000000.66184	0.14099	0.12791	2.07331	11.2405	0	0.0392782
NC_006088.4	19643652	19643911	NC_006088.4.1-90000000.68733	0.45565	0.38806	2.66323	18.1026	0	0.00179387
NC_006088.4	19705543	19705903	NC_006088.4.1-90000000.68896	0.26002	0.21853	3.0054	20.017	0	0
NC_006088.4	19762309	19762501	NC_006088.4.1-90000000.69062	0.35687	0.30133	2.88474	13.3256	0	0.0144011
NC_006088.4	19813047	19813211	NC_006088.4.1-90000000.69195	0.34573	0.28911	3.01379	12.0929	0	0.0236919
NC_006088.4	19860850	19861218	NC_006088.4.1-90000000.69296	0.38679	0.34462	2.25044	14.5286	0	0.00873001
NC_006088.4	19973331	19973493	NC_006088.4.1-90000000.69690	0.44272	0.37878	3.12339	13.9369	0	0.0115681
NC_006088.4	20754738	20754922	NC_006088.4.1-90000000.73186	0.48939	0.41466	2.84475	16.4834	0	0.00179387
NC_006088.4	20783762	20783872	NC_006088.4.1-90000000.73349	0.23481	0.17713	4.35653	11.6645	0	0.0305082
NC_006088.4	20806884	20807015	NC_006088.4.1-90000000.73440	0.40971	0.32561	3.69901	17.4587	0	0.00179387
NC_006088.4	20822372	20822570	NC_006088.4.1-90000000.73502	0.34983	0.29655	2.8387	13.1372	0	0.0177263
NC_006088.4	20885333	20885439	NC_006088.4.1-90000000.73732	0.43365	0.35343	3.33874	11.9067	0	0.0243989
NC_006088.4	21232167	21232475	NC_006088.4.1-90000000.75034	0.30011	0.25942	2.59528	13.9513	0	0.0104502
NC_006088.4	21682531	21682667	NC_006088.4.1-90000000.75722	0.25281	0.19919	3.76614	12.4131	0	0.0234278
NC_006088.4	21826241	21826421	NC_006088.4.1-90000000.76086	0.50522	0.44047	2.59644	12.8264	0	0.0205848
NC_006088.4	23433929	23434073	NC_006088.4.1-90000000.81373	0.27228	0.21943	3.48404	11.7476	0	0.0298628
NC_006088.4	23667925	23668084	NC_006088.4.1-90000000.82237	0.45701	0.39379	2.65523	11.4495	0	0.0314832
NC_006088.4	24258855	24259022	NC_006088.4.1-90000000.83692	0.34892	0.28939	3.14771	13.8018	0	0.0127473
NC_006088.4	24449712	24449847	NC_006088.4.1-90000000.84336	0.35014	0.28534	3.45313	13.4499	0	0.0135875
NC_006088.4	25212583	25212874	NC_006088.4.1-90000000.87463	0.4078	0.36214	2.32072	12.7125	0	0.0207695
NC_006088.4	25265046	25265175	NC_006088.4.1-90000000.87629	0.26448	0.20076	4.26105	14.7938	0	0.00783237
NC_006088.4	25375781	25376087	NC_006088.4.1-90000000.88079	0.25525	0.21545	2.89675	15.1407	0	0.00552615
NC_006088.4	25416513	25416670	NC_006088.4.1-90000000.88255	0.31278	0.20633	6.59046	38.4936	0	0
NC_006088.4	25600824	25601402	NC_006088.4.1-90000000.89146	0.14011	0.11127	3.71279	26.7384	0	0
NC_006088.4	25606025	25607122	NC_006088.4.1-90000000.89169	0.18222	0.15877	2.52209	28.6393	0	0
NC_006088.4	25628505	25628871	NC_006088.4.1-90000000.89256	0.29974	0.26573	2.30502	12.278	0	0.0236919
NC_006088.4	25640152	25640429	NC_006088.4.1-90000000.89298	0.24305	0.20141	3.14815	15.8121	0	0.00478024
NC_006088.4	25722469	25722771	NC_006088.4.1-90000000.89670	0.17215	0.14347	3.07225	12.2467	0	0.0236919
NC_006088.4	25906364	25906502	NC_006088.4.1-90000000.90418	0.26357	0.20483	4.58111	14.5009	0	0.00873001
NC_006088.4	25939973	25940273	NC_006088.4.1-90000000.90530	0.216	0.18297	2.85937	12.6822	0	0.0207695
NC_006088.4	26413408	26413594	NC_006088.4.1-90000000.92504	0.40896	0.35458	2.61555	11.2246	0	0.0392782
NC_006088.4	26546955	26547296	NC_006088.4.1-90000000.92904	0.36483	0.32665	2.19452	11.9005	0	0.0243989
NC_006088.4	26600260	26600584	NC_006088.4.1-90000000.93085	0.42127	0.34023	3.39456	35.9501	0	0
NC_006088.4	26973395	26973523	NC_006088.4.1-90000000.94533	0.41702	0.34222	3.28296	13.7619	0	0.0127473
NC_006088.4	27685340	27685510	NC_006088.4.1-90000000.96691	0.35299	0.28836	3.41062	15.8842	0	0.00478024
NC_006088.4	28245529	28245697	NC_006088.4.1-90000000.97738	0.4418	0.34705	3.85124	25.8761	0	0
NC_006088.4	29447048	29447227	NC_006088.4.1-90000000.102160	0.38221	0.31151	3.25449	16.5652	0	0.00179387
NC_006088.4	30502337	30502561	NC_006088.4.1-90000000.106522	0.4478	0.39035	2.48064	13.0496	0	0.0195239
NC_006088.4	30674134	30674413	NC_006088.4.1-90000000.107182	0.289	0.2516	2.53993	11.7819	0	0.0292977
NC_006088.4	32583797	32583987	NC_006088.4.1-90000000.112762	0.40071	0.34161	2.77749	13.021	0	0.0195239
NC_006088.4	32671390	32671506	NC_006088.4.1-90000000.112936	0.43352	0.36145	3.07022	10.9951	0	0.0452869
NC_006088.4	32876059	32876269	NC_006088.4.1-90000000.113765	0.25373	0.21246	3.00413	12.1856	0	0.0236919
NC_006088.4	34127513	34127624	NC_006088.4.1-90000000.118355	0.42512	0.32275	4.35518	20.8799	0	0
NC_006088.4	34271967	34272084	NC_006088.4.1-90000000.119119	0.45695	0.36474	3.6562	16.2076	0	0.00344405
NC_006088.4	34406298	34406534	NC_006088.4.1-90000000.119768	0.3139	0.27092	2.62302	11.8472	0	0.0273392
NC_006088.4	36600043	36600260	NC_006088.4.1-90000000.127982	0.42657	0.37449	2.41841	11.708	0	0.0302473
NC_006088.4	36618308	36618521	NC_006088.4.1-90000000.128071	0.24035	0.19062	3.70194	17.0309	0	0.00179387
NC_006088.4	36636648	36636822	NC_006088.4.1-90000000.128161	0.3406	0.2851	2.99001	12.7753	0	0.0207695
NC_006088.4	37259362	37259491	NC_006088.4.1-90000000.130054	0.51803	0.43521	2.9625	13.5406	0	0.0127473
NC_006088.4	37333404	37333702	NC_006088.4.1-90000000.130204	0.20285	0.17016	2.98	13.1276	0	0.0177263
NC_006088.4	37629804	37629935	NC_006088.4.1-90000000.130945	0.38979	0.31794	3.50816	14.1727	0	0.0104502
NC_006088.4	38964894	38965046	NC_006088.4.1-90000000.135764	0.42604	0.36157	2.86749	12.5573	0	0.0228223
NC_006088.4	39270835	39270962	NC_006088.4.1-90000000.136952	0.45169	0.37655	3.07362	12.8342	0	0.0205848
NC_006088.4	39318313	39318577	NC_006088.4.1-90000000.137135	0.31051	0.26575	2.72735	13.5739	0	0.0127473
NC_006088.4	41720749	41720860	NC_006088.4.1-90000000.144532	0.37776	0.28121	4.35051	17.8303	0	0.00179387
NC_006088.4	41795877	41796129	NC_006088.4.1-90000000.144734	0.37987	0.33009	2.61248	14.1992	0	0.0104502
NC_006088.4	41915963	41916420	NC_006088.4.1-90000000.145130	0.21022	0.18586	2.34936	11.3895	0	0.0367743
NC_006088.4	41919684	41920006	NC_006088.4.1-90000000.145142	0.21237	0.18115	2.77284	12.4035	0	0.0236919
NC_006088.4	42044452	42044605	NC_006088.4.1-90000000.145405	0.44234	0.37861	2.72239	11.6294	0	0.0305082
NC_006088.4	46274792	46274926	NC_006088.4.1-90000000.159378	0.32714	0.24971	4.21826	18.5785	0	0
NC_006088.4	46284352	46284484	NC_006088.4.1-90000000.159426	0.32714	0.24971	4.21826	18.5785	0	0
NC_006088.4	46460689	46460874	NC_006088.4.1-90000000.160254	0.28474	0.23384	3.23152	13.4896	0	0.0127473
NC_006088.4	46513149	46513269	NC_006088.4.1-90000000.160577	0.34339	0.27098	3.85821	14.3515	0	0.00873001
NC_006088.4	48091411	48091773	NC_006088.4.1-90000000.166559	0.16755	0.1435	4.69982	11.5069	0	0.0314832
NC_006088.4	48111440	48111715	NC_006088.4.1-90000000.166605	0.1991	0.14948	4.57682	25.8069	0	0
NC_006088.4	48178186	48178363	NC_006088.4.1-90000000.166732	0.2905	0.23241	3.35383	14.4026	0	0.00873001
NC_006088.4	48199091	48199366	NC_006088.4.1-90000000.166754	0.19538	0.14665	4.59417	25.8975	0	0
NC_006088.4	48347777	48347904	NC_006088.4.1-90000000.167501	0.54565	0.44995	3.21652	16.3468	0	0.00179387
NC_006088.4	48408624	48408828	NC_006088.4.1-90000000.167835	0.27236	0.22781	3.0227	12.1666	0	0.0236919
NC_006088.4	48465832	48465952	NC_006088.4.1-90000000.168124	0.44243	0.37136	2.95575	11.4495	0	0.0314832
NC_006088.4	48487039	48487595	NC_006088.4.1-90000000.168260	0.1865	0.166	2.2549	10.901	0	0.0477371
NC_006088.4	48629682	48629794	NC_006088.4.1-90000000.169293	0.43423	0.34848	3.73914	15.3805	0	0.00552615
NC_006088.4	48886047	48886201	NC_006088.4.1-90000000.170216	0.31843	0.26538	3.06093	11.3595	0	0.0373116
NC_006088.4	49334944	49335111	NC_006088.4.1-90000000.172247	0.30121	0.24911	3.18926	12.5164	0	0.0228223
NC_006088.4	49345161	49345330	NC_006088.4.1-90000000.172342	0.30374	0.25118	3.18999	12.5201	0	0.0228223
NC_006088.4	49381699	49382138	NC_006088.4.1-90000000.172565	0.16388	0.14012	2.69551	12.6524	0	0.0207695
NC_006088.4	49829566	49829844	NC_006088.4.1-90000000.175170	0.18385	0.13292	5.08712	30.0032	0	0
NC_006088.4	50163856	50163999	NC_006088.4.1-90000000.176733	0.40315	0.30973	3.67616	17.2439	0	0.00179387
NC_006088.4	50291645	50291811	NC_006088.4.1-90000000.177092	0.3951	0.33898	2.7048	11.1898	0	0.0404367
NC_006088.4	50611551	50611713	NC_006088.4.1-90000000.178980	0.28544	0.22863	3.77	15.5308	0	0.00552615
NC_006088.4	50840448	50840632	NC_006088.4.1-90000000.180679	0.39092	0.28139	10.4949	31.198	0	0
NC_006088.4	51634390	51634513	NC_006088.4.1-90000000.185606	0.45107	0.37164	3.13602	12.8271	0	0.0205848
NC_006088.4	52253185	52253302	NC_006088.4.1-90000000.189590	0.41859	0.35014	3.05018	10.8796	0	0.0494103
NC_006088.4	52340596	52340871	NC_006088.4.1-90000000.190033	0.35366	0.31082	2.39711	11.7693	0	0.0298628
NC_006088.4	52399118	52399245	NC_006088.4.1-90000000.190280	0.42093	0.34917	3.15926	12.2354	0	0.0236919
NC_006088.4	52405544	52405691	NC_006088.4.1-90000000.190315	0.42476	0.36178	2.82535	11.731	0	0.0302473
NC_006088.4	52408035	52408226	NC_006088.4.1-90000000.190328	0.29969	0.25486	2.80768	10.951	0	0.0472945
NC_006088.4	52549075	52549197	NC_006088.4.1-90000000.190914	0.54173	0.45319	3.00925	13.9193	0	0.0125126
NC_006088.4	52582925	52583055	NC_006088.4.1-90000000.191042	0.34954	0.28173	3.46286	12.9161	0	0.0200656
NC_006088.4	52739503	52739687	NC_006088.4.1-90000000.191726	0.32459	0.27458	2.89233	11.447	0	0.0314832
NC_006088.4	53256641	53256858	NC_006088.4.1-90000000.194407	0.4125	0.36055	2.44462	11.6706	0	0.0305082
NC_006088.4	53468682	53468845	NC_006088.4.1-90000000.195531	0.35289	0.27367	4.03782	21.5058	0	0
NC_006088.4	54096927	54097184	NC_006088.4.1-90000000.198547	0.26105	0.21335	3.30503	18.1512	0	0.00179387
NC_006088.4	54607999	54608252	NC_006088.4.1-90000000.200822	0.32917	0.27981	2.81039	15.2854	0	0.00552615
NC_006088.4	54970357	54970601	NC_006088.4.1-90000000.202123	0.35134	0.28879	3.27448	22.4971	0	0
NC_006088.4	55027789	55028295	NC_006088.4.1-90000000.202289	0.1515	0.13086	2.62332	12.4858	0	0.0228223
NC_006088.4	55358621	55358732	NC_006088.4.1-90000000.203605	0.28473	0.21878	4.18321	12.8691	0	0.0205848
NC_006088.4	55734913	55735085	NC_006088.4.1-90000000.204748	0.33899	0.27615	3.11477	12.8936	0	0.0205848
NC_006088.4	55851985	55852093	NC_006088.4.1-90000000.205283	0.29477	0.22237	4.42814	14.192	0	0.0104502
NC_006088.4	55954306	55954536	NC_006088.4.1-90000000.205834	0.45794	0.39511	2.64534	15.1259	0	0.00552615
NC_006088.4	56015878	56016012	NC_006088.4.1-90000000.206162	0.47226	0.40548	2.93911	11.1972	0	0.0398974
NC_006088.4	56754532	56754888	NC_006088.4.1-90000000.209499	0.23012	0.16923	4.78155	42.2296	0	0
NC_006088.4	57113165	57113396	NC_006088.4.1-90000000.211097	0.28841	0.23276	3.37339	18.0898	0	0.00179387
NC_006088.4	57156725	57156910	NC_006088.4.1-90000000.211303	0.32243	0.27148	2.98247	12.434	0	0.0234278
NC_006088.4	57209525	57209641	NC_006088.4.1-90000000.211592	0.43265	0.32441	4.53376	22.2875	0	0
NC_006088.4	57235559	57235708	NC_006088.4.1-90000000.211739	0.48172	0.41547	2.60738	11.0704	0	0.044216
NC_006088.4	57673691	57673891	NC_006088.4.1-90000000.213651	0.51738	0.44413	2.68475	17.15	0	0.00179387
NC_006088.4	57689083	57689188	NC_006088.4.1-90000000.213720	0.31991	0.25758	4.31218	11.3417	0	0.037863
NC_006088.4	59362751	59362905	NC_006088.4.1-90000000.218532	0.37966	0.30592	3.51529	17.3325	0	0.00179387
NC_006088.4	59665383	59665662	NC_006088.4.1-90000000.219471	0.3794	0.30625	3.50887	30.902	0	0
NC_006088.4	61023743	61023858	NC_006088.4.1-90000000.225674	0.34427	0.27182	3.78286	13.4732	0	0.0135875
NC_006088.4	61747397	61747499	NC_006088.4.1-90000000.229273	0.41672	0.34041	3.32038	10.961	0	0.0464089
NC_006088.4	63208085	63208376	NC_006088.4.1-90000000.235073	0.19773	0.16802	2.80796	10.9845	0	0.0452869
NC_006088.4	63271748	63272064	NC_006088.4.1-90000000.235333	0.28243	0.24399	2.63625	13.7938	0	0.0127473
NC_006088.4	63338696	63339067	NC_006088.4.1-90000000.235649	0.1554	0.13287	2.95081	10.9219	0	0.0472945
NC_006088.4	63359990	63360116	NC_006088.4.1-90000000.235765	0.45885	0.39044	3.17784	12.1707	0	0.0236919
NC_006088.4	63428502	63428717	NC_006088.4.1-90000000.236173	0.32348	0.24748	4.24255	28.9701	0	0
NC_006088.4	63570510	63570646	NC_006088.4.1-90000000.236757	0.12794	0.0888	5.56453	11.746	0	0.0298628
NC_006088.4	63690114	63690289	NC_006088.4.1-90000000.237248	0.22134	0.17937	3.82957	11.955	0	0.0236919
NC_006088.4	63761190	63761293	NC_006088.4.1-90000000.237469	0.47442	0.39709	3.34354	11.3263	0	0.038181
NC_006088.4	63858832	63859046	NC_006088.4.1-90000000.237767	0.48491	0.39599	3.37992	27.1957	0	0
NC_006088.4	63859054	63859230	NC_006088.4.1-90000000.237768	0.2456	0.18742	4.2793	18.3966	0	0
NC_006088.4	64636194	64636294	NC_006088.4.1-90000000.240433	0.42126	0.33199	3.9038	13.488	0	0.0127473
NC_006088.4	64902311	64902442	NC_006088.4.1-90000000.241268	0.429	0.33963	3.62521	16.8831	0	0.00179387
NC_006088.4	65717654	65717807	NC_006088.4.1-90000000.244652	0.40737	0.33669	3.21314	12.9917	0	0.0200656
NC_006088.4	65763444	65763581	NC_006088.4.1-90000000.244857	0.39567	0.32205	3.40074	14.8748	0	0.00679681
NC_006088.4	65984236	65984533	NC_006088.4.1-90000000.246053	0.27513	0.23726	2.70933	13.517	0	0.0127473
NC_006088.4	66160400	66160695	NC_006088.4.1-90000000.247102	0.31326	0.27529	2.44578	11.785	0	0.0292977
NC_006088.4	66263612	66263843	NC_006088.4.1-90000000.247712	0.37317	0.32523	2.52435	11.6208	0	0.0310047
NC_006088.4	66389886	66390503	NC_006088.4.1-90000000.248355	0.26829	0.2451	1.96501	11.2549	0	0.0392782
NC_006088.4	66498456	66498751	NC_006088.4.1-90000000.248747	0.27354	0.2271	3.14504	19.3698	0	0
NC_006088.4	66556487	66556598	NC_006088.4.1-90000000.248943	0.48545	0.34789	4.43917	21.1792	0	0
NC_006088.4	67813597	67813825	NC_006088.4.1-90000000.253310	0.29198	0.24943	2.76857	11.8491	0	0.0273392
NC_006088.4	70898717	70898841	NC_006088.4.1-90000000.263765	0.41741	0.34307	3.33654	12.8459	0	0.0205848
NC_006088.4	76319050	76319158	NC_006088.4.1-90000000.276824	0.55954	0.44637	3.01002	11.8618	0	0.0265878
NC_006088.4	76735224	76735342	NC_006088.4.1-90000000.277813	0.36615	0.30135	3.2259	10.9996	0	0.0452869
NC_006088.4	80540833	80540965	NC_006088.4.1-90000000.290837	0.32228	0.26103	3.55992	12.6192	0	0.0223803
NC_006088.4	80835112	80835308	NC_006088.4.1-90000000.292502	0.34455	0.29282	2.83705	12.8235	0	0.0205848
NC_006088.4	80877177	80877364	NC_006088.4.1-90000000.292743	0.37943	0.31535	3.11235	16.2811	0	0.00344405
NC_006088.4	81087915	81088131	NC_006088.4.1-90000000.293833	0.16156	0.12608	3.91498	13.0393	0	0.0195239
NC_006088.4	81154655	81154788	NC_006088.4.1-90000000.294249	0.29314	0.22273	4.27701	16.5808	0	0.00179387
NC_006088.4	81154789	81154891	NC_006088.4.1-90000000.294250	0.3685	0.28844	3.8953	13.9349	0	0.0115681
NC_006088.4	81175783	81175938	NC_006088.4.1-90000000.294364	0.35815	0.29231	3.32741	15.2858	0	0.00552615
NC_006088.4	81459566	81459687	NC_006088.4.1-90000000.295988	0.34018	0.27728	3.34636	11.0971	0	0.0425072
NC_006088.4	81504436	81504568	NC_006088.4.1-90000000.296298	0.37451	0.2759	4.94678	25.9028	0	0
NC_006088.4	81541496	81541638	NC_006088.4.1-90000000.296508	0.39265	0.32907	3.00009	12.1092	0	0.0236919
NC_006088.4	81593023	81593141	NC_006088.4.1-90000000.296694	0.37015	0.28204	4.27104	18.8263	0	0
NC_006088.4	81600122	81600518	NC_006088.4.1-90000000.296734	0.30214	0.2706	2.19068	11.2604	0	0.0391705
NC_006088.4	81651352	81651676	NC_006088.4.1-90000000.297008	0.24638	0.21485	2.49925	11.0614	0	0.0447492
NC_006088.4	81683579	81683691	NC_006088.4.1-90000000.297166	0.47783	0.39868	3.04575	11.5803	0	0.0313782
NC_006088.4	81718693	81718858	NC_006088.4.1-90000000.297392	0.27802	0.2193	3.77366	15.9391	0	0.00478024
NC_006088.4	81742888	81743097	NC_006088.4.1-90000000.297540	0.28471	0.23881	2.9775	12.7411	0	0.0207695
NC_006088.4	81803108	81803336	NC_006088.4.1-90000000.297915	0.22277	0.18482	3.10737	12.0171	0	0.0236919
NC_006088.4	81914881	81915005	NC_006088.4.1-90000000.298546	0.50948	0.4239	2.94928	12.3384	0	0.0236919
NC_006088.4	82032513	82032834	NC_006088.4.1-90000000.299332	0.25584	0.21742	2.82746	16.1689	0	0.00344405
NC_006088.4	82173936	82174167	NC_006088.4.1-90000000.300244	0.42005	0.36676	2.49292	13.4586	0	0.0135875
NC_006088.4	82224312	82224579	NC_006088.4.1-90000000.300609	0.42174	0.37559	2.30082	11.808	0	0.0278711
NC_006088.4	82348029	82348262	NC_006088.4.1-90000000.301364	0.34116	0.2948	2.53563	11.3495	0	0.037863
NC_006088.4	82466239	82466413	NC_006088.4.1-90000000.302030	0.3221	0.26331	3.43488	14.7494	0	0.00783237
NC_006088.4	82618792	82618897	NC_006088.4.1-90000000.302903	0.52767	0.43084	3.33769	14.8204	0	0.00679681
NC_006088.4	82708388	82708937	NC_006088.4.1-90000000.303387	0.20609	0.18385	2.24116	11.4096	0	0.0348822
NC_006088.4	82724894	82725302	NC_006088.4.1-90000000.303497	0.091	0.06704	4.94439	19.4399	0	0
NC_006088.4	82956622	82957173	NC_006088.4.1-90000000.305107	0.06991	0.05504	4.46673	14.3101	0	0.00873001
NC_006088.4	83294675	83294934	NC_006088.4.1-90000000.306474	0.21147	0.15738	4.58114	27.0599	0	0
NC_006088.4	83822983	83823094	NC_006088.4.1-90000000.308876	0.53719	0.45496	3.11477	10.9993	0	0.0452869
NC_006088.4	84302466	84302818	NC_006088.4.1-90000000.310656	0.27418	0.23908	2.52349	13.2151	0	0.0151455
NC_006088.4	84365503	84365806	NC_006088.4.1-90000000.310969	0.30373	0.25783	2.83192	17.511	0	0.00179387
NC_006088.4	84747078	84747285	NC_006088.4.1-90000000.312614	0.28568	0.23913	3.10345	13.5022	0	0.0127473
NC_006088.4	84802128	84802629	NC_006088.4.1-90000000.312846	0.17724	0.15128	2.75935	15.6939	0	0.00478024
NC_006088.4	85017746	85018009	NC_006088.4.1-90000000.313469	0.24377	0.17661	4.77182	31.6521	0	0
NC_006088.4	85103115	85103220	NC_006088.4.1-90000000.313676	0.41757	0.34376	3.20855	10.8951	0	0.0482527
NC_006088.4	85124289	85124441	NC_006088.4.1-90000000.313755	0.3864	0.32165	3.18154	13.61	0	0.0127473
NC_006088.4	85181330	85181496	NC_006088.4.1-90000000.313895	0.35826	0.30549	3.08268	11.3097	0	0.038181
NC_006088.4	85515280	85515626	NC_006088.4.1-90000000.315020	0.31224	0.26864	2.87134	18.3342	0	0.00179387
NC_006088.4	85550398	85550540	NC_006088.4.1-90000000.315113	0.32253	0.23447	4.93502	24.4431	0	0
NC_006088.4	85557013	85557392	NC_006088.4.1-90000000.315132	0.34123	0.30163	2.35816	15.0872	0	0.00552615
NC_006088.4	85567488	85567727	NC_006088.4.1-90000000.315164	0.21003	0.16174	4.08905	20.2179	0	0
NC_006088.4	85571597	85571879	NC_006088.4.1-90000000.315177	0.43633	0.39409	2.24658	11.1307	0	0.0413656
NC_006088.4	87107556	87107677	NC_006088.4.1-90000000.320919	0.40273	0.33137	3.24424	12.3119	0	0.0236919
NC_006088.4	87365070	87365632	NC_006088.4.1-90000000.321873	0.12463	0.1079	2.76926	11.5968	0	0.0310047
NC_006088.4	87945741	87945903	NC_006088.4.1-90000000.323335	0.48432	0.41832	2.60818	11.6747	0	0.0305082
NC_006088.4	88562879	88563054	NC_006088.4.1-90000000.325069	0.2564	0.211	3.18952	11.2065	0	0.0392782
NC_006088.4	88930288	88930400	NC_006088.4.1-90000000.326087	0.40098	0.3053	3.99889	16.1968	0	0.00344405
NC_006088.4	88983448	88983792	NC_006088.4.1-90000000.326239	0.28061	0.24714	2.29379	10.9113	0	0.0477371
NC_006088.4	89630886	89631070	NC_006088.4.1-90000000.328132	0.47978	0.41101	2.61866	13.411	0	0.0135875
NC_006088.4	90810598	90810732	NC_006088.4.90000001-180000000.1710	0.32718	0.24817	4.39741	18.8843	0	0
NC_006088.4	90950738	90950959	NC_006088.4.90000001-180000000.1986	0.48507	0.4297	2.31466	11.5605	0	0.0313782
NC_006088.4	91694195	91694346	NC_006088.4.90000001-180000000.4616	0.31579	0.23959	4.42986	20.8592	0	0
NC_006088.4	93696024	93696137	NC_006088.4.90000001-180000000.12781	0.29376	0.23025	3.88639	11.3503	0	0.037863
NC_006088.4	93696153	93696344	NC_006088.4.90000001-180000000.12782	0.39114	0.33831	2.63473	11.3508	0	0.037863
NC_006088.4	93784617	93784730	NC_006088.4.90000001-180000000.12987	0.47742	0.38156	3.56404	15.6725	0	0.00478024
NC_006088.4	94666221	94666381	NC_006088.4.90000001-180000000.14832	0.44974	0.38456	2.76396	12.2568	0	0.0236919
NC_006088.4	95311423	95311578	NC_006088.4.90000001-180000000.16305	0.44776	0.36848	3.34506	17.6693	0	0.00179387
NC_006088.4	96712574	96712884	NC_006088.4.90000001-180000000.20515	0.30806	0.26857	2.50216	13.3478	0	0.0144011
NC_006088.4	97076397	97076634	NC_006088.4.90000001-180000000.22013	0.17888	0.14025	3.83112	15.2402	0	0.00552615
NC_006088.4	97083635	97083998	NC_006088.4.90000001-180000000.22043	0.36777	0.32303	2.42673	16.905	0	0.00179387
NC_006088.4	98123662	98123844	NC_006088.4.90000001-180000000.25482	0.32211	0.26908	3.10385	13.2048	0	0.0151455
NC_006088.4	98299819	98300107	NC_006088.4.90000001-180000000.26218	0.17369	0.14493	3.04403	11.2904	0	0.0385402
NC_006088.4	98323175	98323684	NC_006088.4.90000001-180000000.26330	0.26536	0.23801	2.17061	12.638	0	0.0215888
NC_006088.4	98504866	98505005	NC_006088.4.90000001-180000000.27262	0.39871	0.32957	3.21355	13.7573	0	0.0127473
NC_006088.4	98560316	98560648	NC_006088.4.90000001-180000000.27553	0.32756	0.28964	2.36309	12.7251	0	0.0207695
NC_006088.4	98566231	98566356	NC_006088.4.90000001-180000000.27586	0.22368	0.16298	4.99137	15.3709	0	0.00552615
NC_006088.4	99891156	99891360	NC_006088.4.90000001-180000000.31265	0.41095	0.3134	4.14849	32.3695	0	0
NC_006088.4	100892136	100892379	NC_006088.4.90000001-180000000.32565	0.11819	0.09196	3.97926	11.1863	0	0.0404367
NC_006088.4	102321886	102322098	NC_006088.4.90000001-180000000.34361	0.33766	0.26482	3.86371	23.501	0	0
NC_006088.4	108428261	108428439	NC_006088.4.90000001-180000000.56921	0.45003	0.39013	2.60269	11.3877	0	0.0367743
NC_006088.4	108714977	108715194	NC_006088.4.90000001-180000000.57801	0.38293	0.33171	2.58792	11.5622	0	0.0313782
NC_006088.4	108715767	108715963	NC_006088.4.90000001-180000000.57802	0.3814	0.31895	3.04641	16.5702	0	0.00179387
NC_006088.4	110487760	110488006	NC_006088.4.90000001-180000000.64995	0.26628	0.21979	3.18582	16.0654	0	0.00344405
NC_006088.4	110535975	110536119	NC_006088.4.90000001-180000000.65229	0.34008	0.2782	3.32074	12.7354	0	0.0207695
NC_006088.4	111169096	111169230	NC_006088.4.90000001-180000000.67793	0.39499	0.33062	3.0112	11.0646	0	0.044216
NC_006088.4	112452043	112452331	NC_006088.4.90000001-180000000.72749	0.28668	0.23361	3.33719	21.7805	0	0
NC_006088.4	112561373	112561573	NC_006088.4.90000001-180000000.73525	0.16347	0.12706	3.98924	12.799	0	0.0207695
NC_006088.4	113750428	113750535	NC_006088.4.90000001-180000000.77552	0.4516	0.36676	3.20637	11.5328	0	0.0313782
NC_006088.4	114427813	114427923	NC_006088.4.90000001-180000000.79401	0.41435	0.34923	3.70382	11.1377	0	0.0413656
NC_006088.4	114479651	114479805	NC_006088.4.90000001-180000000.79631	0.27404	0.21866	3.63636	13.3578	0	0.0144011
NC_006088.4	114609067	114609250	NC_006088.4.90000001-180000000.80056	0.35036	0.2692	4.9437	29.2423	0	0
NC_006088.4	115098648	115099018	NC_006088.4.90000001-180000000.81065	0.26595	0.22984	2.60764	15.5673	0	0.00552615
NC_006088.4	115142801	115143071	NC_006088.4.90000001-180000000.81162	0.20436	0.16941	3.13763	13.3964	0	0.0135875
NC_006088.4	115811360	115811647	NC_006088.4.90000001-180000000.82841	0.44167	0.38568	2.55557	17.3073	0	0.00179387
NC_006088.4	115870719	115870902	NC_006088.4.90000001-180000000.82965	0.21216	0.17106	3.47668	11.7353	0	0.0302473
NC_006088.4	116861880	116862147	NC_006088.4.90000001-180000000.85014	0.42298	0.37603	2.27694	11.2811	0	0.0385402
NC_006088.4	117233057	117233197	NC_006088.4.90000001-180000000.85511	0.37935	0.31889	3.24324	11.2767	0	0.0385402
NC_006088.4	117715992	117716141	NC_006088.4.90000001-180000000.86406	0.23714	0.18891	3.6419	11.4686	0	0.0314832
NC_006088.4	117738501	117739066	NC_006088.4.90000001-180000000.86502	0.15487	0.13517	2.50105	12.3138	0	0.0236919
NC_006088.4	118169795	118169903	NC_006088.4.90000001-180000000.87987	0.32915	0.25428	4.10445	14.2538	0	0.00990204
NC_006088.4	118683530	118683650	NC_006088.4.90000001-180000000.90188	0.46587	0.3668	3.47152	15.3323	0	0.00552615
NC_006088.4	118685605	118685776	NC_006088.4.90000001-180000000.90197	0.3499	0.2814	3.5189	17.6839	0	0.00179387
NC_006088.4	121144487	121144718	NC_006088.4.90000001-180000000.99260	0.3029	0.25463	2.98958	14.678	0	0.00783237
NC_006088.4	121238061	121238237	NC_006088.4.90000001-180000000.99757	0.25854	0.20792	3.36235	11.9568	0	0.0236919
NC_006088.4	125775103	125775208	NC_006088.4.90000001-180000000.115061	0.46147	0.35423	4.18095	17.2195	0	0.00179387
NC_006088.4	125885505	125885945	NC_006088.4.90000001-180000000.115364	0.27044	0.23305	2.53413	16.5766	0	0.00179387
NC_006088.4	125954818	125955080	NC_006088.4.90000001-180000000.115499	0.32505	0.28486	2.47833	11.2754	0	0.0385402
NC_006088.4	126402615	126402718	NC_006088.4.90000001-180000000.116170	0.55572	0.44733	3.34773	12.619	0	0.0223803
NC_006088.4	127054018	127054653	NC_006088.4.90000001-180000000.117583	0.19653	0.17169	2.57379	17.1003	0	0.00179387
NC_006088.4	128178725	128178928	NC_006088.4.90000001-180000000.119007	0.40898	0.34652	2.8379	15.7752	0	0.00478024
NC_006088.4	128210380	128210820	NC_006088.4.90000001-180000000.119085	0.22667	0.20082	2.31389	11.237	0	0.0392782
NC_006088.4	129394849	129395091	NC_006088.4.90000001-180000000.122645	0.38918	0.32393	3.07787	21.0033	0	0
NC_006088.4	129405712	129405882	NC_006088.4.90000001-180000000.122717	0.30852	0.24345	3.75647	17.8073	0	0.00179387
NC_006088.4	129562724	129563223	NC_006088.4.90000001-180000000.123344	0.10803	0.09054	2.99949	11.8234	0	0.0278711
NC_006088.4	129570359	129570680	NC_006088.4.90000001-180000000.123379	0.38387	0.32966	2.68287	19.9447	0	0
NC_006088.4	129579849	129580024	NC_006088.4.90000001-180000000.123423	0.25802	0.2121	3.21804	11.3893	0	0.0367743
NC_006088.4	129599355	129599908	NC_006088.4.90000001-180000000.123497	0.20338	0.17898	2.39797	14.0537	0	0.0104502
NC_006088.4	129877988	129878324	NC_006088.4.90000001-180000000.124743	0.19073	0.16134	2.86794	12.7405	0	0.0207695
NC_006088.4	132975752	132976110	NC_006088.4.90000001-180000000.135939	0.33879	0.29264	2.59286	18.1876	0	0.00179387
NC_006088.4	133003762	133003964	NC_006088.4.90000001-180000000.136085	0.39482	0.33888	2.75714	13.2559	0	0.0151455
NC_006088.4	133071542	133072071	NC_006088.4.90000001-180000000.136511	0.26867	0.24252	2.11123	11.8254	0	0.0278711
NC_006088.4	133283286	133283480	NC_006088.4.90000001-180000000.137430	0.339	0.28791	2.8971	12.2782	0	0.0236919
NC_006088.4	133696929	133697160	NC_006088.4.90000001-180000000.139575	0.27443	0.22599	3.21276	15.8363	0	0.00478024
NC_006088.4	134446383	134446527	NC_006088.4.90000001-180000000.142839	0.30556	0.25177	3.19617	10.8639	0	0.0498067
NC_006088.4	134542611	134542801	NC_006088.4.90000001-180000000.143231	0.37578	0.30063	3.64898	21.9849	0	0
NC_006088.4	134623332	134623438	NC_006088.4.90000001-180000000.143556	0.32573	0.24812	3.88575	11.5892	0	0.0310047
NC_006088.4	134683475	134683640	NC_006088.4.90000001-180000000.143826	0.43753	0.38664	4.0988	13.7342	0	0.0127473
NC_006088.4	134769460	134769577	NC_006088.4.90000001-180000000.144173	0.5568	0.47064	2.8796	11.9223	0	0.0236919
NC_006088.4	134822992	134823261	NC_006088.4.90000001-180000000.144445	0.2264	0.18969	3.3166	14.7288	0	0.00783237
NC_006088.4	134832175	134832530	NC_006088.4.90000001-180000000.144487	0.27375	0.23911	2.50614	13.4033	0	0.0135875
NC_006088.4	134867944	134868144	NC_006088.4.90000001-180000000.144678	0.3267	0.26854	3.26852	16.6447	0	0.00179387
NC_006088.4	134968059	134968234	NC_006088.4.90000001-180000000.145214	0.34414	0.2766	3.56422	18.1553	0	0.00179387
NC_006088.4	134981456	134981637	NC_006088.4.90000001-180000000.145285	0.32766	0.27495	2.98223	12.6509	0	0.0207695
NC_006088.4	135925065	135925183	NC_006088.4.90000001-180000000.148989	0.49948	0.41665	3.03293	12.9897	0	0.0200656
NC_006088.4	137121380	137121582	NC_006088.4.90000001-180000000.154026	0.17099	0.13569	3.67663	11.3434	0	0.037863
NC_006088.4	138128754	138128887	NC_006088.4.90000001-180000000.157142	0.32002	0.25629	3.58267	13.0905	0	0.0177263
NC_006088.4	138555372	138555476	NC_006088.4.90000001-180000000.158454	0.34505	0.27515	3.86531	11.3913	0	0.0361678
NC_006088.4	139515891	139516030	NC_006088.4.90000001-180000000.162062	0.36139	0.287	3.67332	16.3529	0	0.00179387
NC_006088.4	140370521	140370758	NC_006088.4.90000001-180000000.164572	0.22385	0.18715	3.01761	11.5265	0	0.0314832
NC_006088.4	140955076	140955378	NC_006088.4.90000001-180000000.166098	0.16925	0.13465	3.67572	16.9754	0	0.00179387
NC_006088.4	141006984	141007111	NC_006088.4.90000001-180000000.166240	0.38399	0.2945	4.41618	19.0942	0	0
NC_006088.4	141130170	141130290	NC_006088.4.90000001-180000000.166903	0.16543	0.11562	5.47733	13.0332	0	0.0195239
NC_006088.4	141182842	141183010	NC_006088.4.90000001-180000000.167190	0.317	0.25729	3.38587	14.788	0	0.00783237
NC_006088.4	142256447	142256855	NC_006088.4.90000001-180000000.169230	0.25576	0.22679	2.32997	12.124	0	0.0236919
NC_006088.4	142766026	142766169	NC_006088.4.90000001-180000000.170603	0.35117	0.28601	3.35268	13.2851	0	0.0151455
NC_006088.4	145628916	145629062	NC_006088.4.90000001-180000000.180635	0.36752	0.30874	2.93664	11.3498	0	0.037863
NC_006088.4	146232293	146232647	NC_006088.4.90000001-180000000.182450	0.30417	0.27051	2.26492	11.4056	0	0.0354766
NC_006088.4	146233231	146233358	NC_006088.4.90000001-180000000.182458	0.35178	0.28565	3.36619	12.4514	0	0.0234278
NC_006088.4	146264094	146264482	NC_006088.4.90000001-180000000.182615	0.20349	0.17248	2.83435	14.518	0	0.00873001
NC_006088.4	146337208	146337337	NC_006088.4.90000001-180000000.183038	0.33092	0.26803	3.42426	12.3625	0	0.0236919
NC_006088.4	146784442	146784562	NC_006088.4.90000001-180000000.184929	0.34455	0.25451	5.92112	24.0919	0	0
NC_006088.4	146807322	146807490	NC_006088.4.90000001-180000000.184998	0.37076	0.31504	2.81247	11.2871	0	0.0385402
NC_006088.4	147093912	147094287	NC_006088.4.90000001-180000000.185916	0.22998	0.19108	3.1273	19.6168	0	0
NC_006088.4	147298728	147298946	NC_006088.4.90000001-180000000.186546	0.29133	0.23669	3.26624	16.0582	0	0.00478024
NC_006088.4	148177870	148178127	NC_006088.4.90000001-180000000.188251	0.40435	0.35397	2.38522	12.0633	0	0.0236919
NC_006088.4	149167308	149167449	NC_006088.4.90000001-180000000.188970	0.45657	0.36605	3.83646	18.2422	0	0.00179387
NC_006088.4	150083449	150083550	NC_006088.4.90000001-180000000.189604	0.21775	0.15893	4.81952	11.5998	0	0.0310047
NC_006088.4	151804369	151804581	NC_006088.4.90000001-180000000.191099	0.42599	0.35792	2.96096	18.3255	0	0.00179387
NC_006088.4	151999464	151999769	NC_006088.4.90000001-180000000.191183	0.45933	0.40236	2.44475	17.3654	0	0.00179387
NC_006088.4	152639545	152639720	NC_006088.4.90000001-180000000.192072	0.32432	0.27052	3.07371	12.8388	0	0.0205848
NC_006088.4	152746104	152746228	NC_006088.4.90000001-180000000.192636	0.26256	0.20684	3.76945	11.4397	0	0.0314832
NC_006088.4	152963251	152963769	NC_006088.4.90000001-180000000.193413	0.11079	0.09152	3.17046	14.4203	0	0.00873001
NC_006088.4	153271399	153272073	NC_006088.4.90000001-180000000.194304	0.08609	0.0725	2.92585	12.0988	0	0.0236919
NC_006088.4	153658445	153658727	NC_006088.4.90000001-180000000.195568	0.40967	0.34809	2.8237	21.0503	0	0
NC_006088.4	153669905	153671120	NC_006088.4.90000001-180000000.195588	0.11315	0.10204	2.11663	12.0504	0	0.0236919
NC_006088.4	153699902	153700035	NC_006088.4.90000001-180000000.195710	0.43778	0.35952	3.26752	14.4946	0	0.00873001
NC_006088.4	153701146	153701357	NC_006088.4.90000001-180000000.195721	0.30522	0.26027	2.79494	11.888	0	0.0259365
NC_006088.4	153715433	153715818	NC_006088.4.90000001-180000000.195770	0.15562	0.13213	2.82486	11.4485	0	0.0314832
NC_006088.4	153870570	153870701	NC_006088.4.90000001-180000000.196209	0.44286	0.36731	3.15421	13.4953	0	0.0127473
NC_006088.4	153910190	153910447	NC_006088.4.90000001-180000000.196310	0.43001	0.37334	2.5901	16.2288	0	0.00344405
NC_006088.4	155270481	155270606	NC_006088.4.90000001-180000000.199671	0.47026	0.38797	3.16059	13.7074	0	0.0127473
NC_006088.4	155958839	155958941	NC_006088.4.90000001-180000000.202272	0.36256	0.28613	3.8005	12.5421	0	0.0228223
NC_006088.4	156342884	156343108	NC_006088.4.90000001-180000000.203770	0.34292	0.28833	2.97947	16.0293	0	0.00478024
NC_006088.4	156414420	156414559	NC_006088.4.90000001-180000000.204025	0.31803	0.26001	3.32299	11.8989	0	0.0243989
NC_006088.4	156524895	156525014	NC_006088.4.90000001-180000000.204373	0.20123	0.13541	6.10108	18.1758	0	0.00179387
NC_006088.4	156552123	156552401	NC_006088.4.90000001-180000000.204498	0.2838	0.2325	3.30189	20.6327	0	0
NC_006088.4	156589838	156590339	NC_006088.4.90000001-180000000.204603	0.25605	0.227	2.30428	14.4079	0	0.00873001
NC_006088.4	156594733	156595497	NC_006088.4.90000001-180000000.204614	0.17361	0.15544	2.24408	13.2987	0	0.0151455
NC_006088.4	156595584	156595742	NC_006088.4.90000001-180000000.204616	0.42355	0.36281	2.76298	11.3156	0	0.038181
NC_006088.4	156654440	156654883	NC_006088.4.90000001-180000000.204807	0.31759	0.27337	2.66208	22.4967	0	0
NC_006088.4	156673527	156673813	NC_006088.4.90000001-180000000.204889	0.15485	0.12486	3.51788	13.1365	0	0.0177263
NC_006088.4	156737756	156738898	NC_006088.4.90000001-180000000.205199	0.04548	0.03642	3.55685	16.7976	0	0.00179387
NC_006088.4	156746515	156747255	NC_006088.4.90000001-180000000.205244	0.13194	0.11101	3.1187	21.7388	0	0
NC_006088.4	156805122	156805231	NC_006088.4.90000001-180000000.205470	0.52158	0.43188	3.42736	14.2624	0	0.00990204
NC_006088.4	156869566	156870177	NC_006088.4.90000001-180000000.205712	0.15316	0.13501	2.38215	11.4717	0	0.0314832
NC_006088.4	156872106	156872275	NC_006088.4.90000001-180000000.205724	0.34437	0.29055	2.92854	11.683	0	0.0305082
NC_006088.4	156877756	156878191	NC_006088.4.90000001-180000000.205750	0.13123	0.10847	3.14799	14.2524	0	0.00990204
NC_006088.4	156895159	156895287	NC_006088.4.90000001-180000000.205835	0.22834	0.17007	4.63034	14.941	0	0.00552615
NC_006088.4	156961333	156961919	NC_006088.4.90000001-180000000.206075	0.12872	0.10978	2.84186	14.033	0	0.0104502
NC_006088.4	156975131	156975571	NC_006088.4.90000001-180000000.206151	0.26638	0.23602	2.31796	13.4105	0	0.0135875
NC_006088.4	157014672	157014844	NC_006088.4.90000001-180000000.206289	0.33318	0.27402	3.28287	14.2442	0	0.00990204
NC_006088.4	157027480	157027751	NC_006088.4.90000001-180000000.206336	0.36501	0.32137	2.40785	10.8957	0	0.0482527
NC_006088.4	157080310	157080785	NC_006088.4.90000001-180000000.206489	0.13771	0.1131	3.23699	16.8778	0	0.00179387
NC_006088.4	157117593	157117978	NC_006088.4.90000001-180000000.206580	0.21887	0.19027	2.55859	12.5271	0	0.0228223
NC_006088.4	157174244	157174585	NC_006088.4.90000001-180000000.206732	0.29793	0.26309	2.35052	11.8401	0	0.0278711
NC_006088.4	157194596	157194741	NC_006088.4.90000001-180000000.206771	0.33112	0.25653	4.00677	18.0981	0	0.00179387
NC_006088.4	157198873	157199013	NC_006088.4.90000001-180000000.206783	0.56974	0.49306	2.60022	11.0182	0	0.0452869
NC_006088.4	157258154	157258988	NC_006088.4.90000001-180000000.206898	0.1065	0.09298	2.50349	12.6125	0	0.0223803
NC_006088.4	157291682	157292176	NC_006088.4.90000001-180000000.206964	0.19119	0.16728	2.61379	13.776	0	0.0127473
NC_006088.4	157309459	157309567	NC_006088.4.90000001-180000000.206987	0.39486	0.32366	3.6084	11.5015	0	0.0314832
NC_006088.4	157311733	157311951	NC_006088.4.90000001-180000000.206991	0.13773	0.10452	4.95922	15.0481	0	0.00552615
NC_006088.4	157386619	157386955	NC_006088.4.90000001-180000000.207106	0.35858	0.3202	2.23397	11.6586	0	0.0305082
NC_006088.4	157392550	157392722	NC_006088.4.90000001-180000000.207131	0.23912	0.19179	3.6674	12.6154	0	0.0223803
NC_006088.4	157487435	157487589	NC_006088.4.90000001-180000000.207321	0.45388	0.36548	3.46989	20.0336	0	0
NC_006088.4	158048246	158048452	NC_006088.4.90000001-180000000.207957	0.35473	0.2947	3.50285	18.5983	0	0
NC_006088.4	158289374	158289499	NC_006088.4.90000001-180000000.208204	0.38534	0.30764	3.61263	14.5671	0	0.00783237
NC_006088.4	158523834	158523996	NC_006088.4.90000001-180000000.208415	0.38087	0.31187	3.28479	15.8554	0	0.00478024
NC_006088.4	158819905	158820127	NC_006088.4.90000001-180000000.208734	0.36842	0.3175	2.65522	12.7151	0	0.0207695
NC_006088.4	159021408	159021549	NC_006088.4.90000001-180000000.209029	0.38102	0.32061	2.93757	11.0222	0	0.0452869
NC_006088.4	159038822	159038955	NC_006088.4.90000001-180000000.209111	0.24693	0.17814	5.06273	18.8802	0	0
NC_006088.4	159089942	159090265	NC_006088.4.90000001-180000000.209318	0.25374	0.2146	2.87391	16.5555	0	0.00179387
NC_006088.4	159106432	159106720	NC_006088.4.90000001-180000000.209448	0.30897	0.26989	2.48715	12.0965	0	0.0236919
NC_006088.4	159116181	159116613	NC_006088.4.90000001-180000000.209509	0.24253	0.21596	2.25097	11.064	0	0.044216
NC_006088.4	159131952	159132229	NC_006088.4.90000001-180000000.209588	0.39716	0.35409	2.25635	11.0956	0	0.0425072
NC_006088.4	159193394	159193751	NC_006088.4.90000001-180000000.209882	0.21769	0.18664	2.72021	13.2698	0	0.0151455
NC_006088.4	159201481	159201763	NC_006088.4.90000001-180000000.209917	0.37198	0.32644	2.41341	12.9353	0	0.0200656
NC_006088.4	159244495	159245015	NC_006088.4.90000001-180000000.210154	0.15852	0.13813	2.71808	13.1639	0	0.0177263
NC_006088.4	159331893	159332361	NC_006088.4.90000001-180000000.210513	0.23486	0.2078	2.33216	13.1162	0	0.0177263
NC_006088.4	159345979	159346107	NC_006088.4.90000001-180000000.210593	0.41045	0.33619	3.2869	13.3274	0	0.0144011
NC_006088.4	159359177	159359444	NC_006088.4.90000001-180000000.210648	0.13854	0.1116	3.48972	11.3639	0	0.0373116
NC_006088.4	159402081	159402310	NC_006088.4.90000001-180000000.210820	0.37604	0.32134	3.13312	16.8548	0	0.00179387
NC_006088.4	159402314	159402500	NC_006088.4.90000001-180000000.210821	0.39548	0.34587	2.8128	11.5921	0	0.0310047
NC_006088.4	159416142	159416333	NC_006088.4.90000001-180000000.210866	0.31155	0.25996	3.05543	12.8482	0	0.0205848
NC_006088.4	159452930	159453695	NC_006088.4.90000001-180000000.210970	0.21733	0.19275	2.32617	18.9072	0	0
NC_006088.4	159460550	159460878	NC_006088.4.90000001-180000000.211010	0.26372	0.21714	3.37095	23.1543	0	0
NC_006088.4	159500466	159500588	NC_006088.4.90000001-180000000.211152	0.42368	0.35432	3.04103	11.2323	0	0.0392782
NC_006088.4	159767908	159768050	NC_006088.4.90000001-180000000.212006	0.42606	0.34139	3.57085	18.5173	0	0
NC_006088.4	160282586	160282808	NC_006088.4.90000001-180000000.212698	0.3117	0.2563	3.22556	17.1303	0	0.00179387
NC_006088.4	160411811	160412001	NC_006088.4.90000001-180000000.212810	0.2739	0.22354	3.31716	13.7341	0	0.0127473
NC_006088.4	160481268	160481724	NC_006088.4.90000001-180000000.212870	0.22814	0.19777	2.57658	15.8398	0	0.00478024
NC_006088.4	160661090	160661414	NC_006088.4.90000001-180000000.213083	0.38683	0.34715	2.19118	11.4744	0	0.0314832
NC_006088.4	160680773	160681091	NC_006088.4.90000001-180000000.213100	0.28061	0.24094	2.68627	15.1345	0	0.00552615
NC_006088.4	160772295	160772403	NC_006088.4.90000001-180000000.213198	0.4732	0.36592	4.14636	18.8226	0	0
NC_006088.4	161461183	161461319	NC_006088.4.90000001-180000000.213927	0.42423	0.34214	3.50024	16.3092	0	0.00179387
NC_006088.4	162632119	162632467	NC_006088.4.90000001-180000000.216296	0.27719	0.23891	2.65095	15.9988	0	0.00478024
NC_006088.4	162807793	162807921	NC_006088.4.90000001-180000000.216935	0.15398	0.10627	5.69226	13.4774	0	0.0135875
NC_006088.4	163028055	163028179	NC_006088.4.90000001-180000000.217555	0.43763	0.36443	3.19337	11.2992	0	0.038181
NC_006088.4	163041310	163041434	NC_006088.4.90000001-180000000.217595	0.37182	0.30792	3.1488	11.0327	0	0.0451944
NC_006088.4	163072112	163072830	NC_006088.4.90000001-180000000.217690	0.24626	0.22105	2.17121	16.5919	0	0.00179387
NC_006088.4	163120532	163120711	NC_006088.4.90000001-180000000.217800	0.10664	0.07616	5.14372	11.6764	0	0.0305082
NC_006088.4	163294031	163294161	NC_006088.4.90000001-180000000.218256	0.22912	0.17164	5.18373	15.5971	0	0.00552615
NC_006088.4	163294813	163295074	NC_006088.4.90000001-180000000.218259	0.30789	0.2689	2.69791	12.0285	0	0.0236919
NC_006088.4	163324449	163324652	NC_006088.4.90000001-180000000.218351	0.39372	0.32959	3.00794	16.9431	0	0.00179387
NC_006088.4	163339336	163339450	NC_006088.4.90000001-180000000.218385	0.44704	0.36745	3.28033	12.5006	0	0.0228223
NC_006088.4	163376215	163376345	NC_006088.4.90000001-180000000.218468	0.4005	0.33654	3.17399	11.2906	0	0.0385402
NC_006088.4	163426704	163426841	NC_006088.4.90000001-180000000.218567	0.33768	0.24262	5.09662	26.3944	0	0
NC_006088.4	163434490	163434668	NC_006088.4.90000001-180000000.218605	0.48162	0.41662	2.65813	13.226	0	0.0151455
NC_006088.4	163440772	163441062	NC_006088.4.90000001-180000000.218637	0.40215	0.3585	2.25072	12.1197	0	0.0236919
NC_006088.4	163556744	163556957	NC_006088.4.90000001-180000000.219193	0.28612	0.2095	4.85377	32.4717	0	0
NC_006088.4	163566460	163566738	NC_006088.4.90000001-180000000.219218	0.37121	0.32812	2.35768	12.1432	0	0.0236919
NC_006088.4	163695330	163695670	NC_006088.4.90000001-180000000.219598	0.2672	0.22827	2.75928	16.1671	0	0.00344405
NC_006088.4	163737375	163737538	NC_006088.4.90000001-180000000.219688	0.26681	0.21989	3.20183	11.2873	0	0.0385402
NC_006088.4	164269886	164270345	NC_006088.4.90000001-180000000.220557	0.19317	0.16429	2.79311	16.7951	0	0.00179387
NC_006088.4	164296854	164297009	NC_006088.4.90000001-180000000.220606	0.47396	0.38287	3.69018	16.5458	0	0.00179387
NC_006088.4	164641674	164641813	NC_006088.4.90000001-180000000.221240	0.51827	0.44765	2.714	11.0376	0	0.0451944
NC_006088.4	164683326	164683431	NC_006088.4.90000001-180000000.221298	0.41266	0.33632	3.5735	12.7071	0	0.0207695
NC_006088.4	164683478	164683616	NC_006088.4.90000001-180000000.221300	0.31359	0.23275	4.61893	21.6121	0	0
NC_006088.4	164968628	164969032	NC_006088.4.90000001-180000000.222010	0.2246	0.19847	2.34587	10.8588	0	0.0498067
NC_006088.4	165002769	165002903	NC_006088.4.90000001-180000000.222147	0.40057	0.33566	3.02736	11.1814	0	0.0404367
NC_006088.4	165124032	165124194	NC_006088.4.90000001-180000000.222486	0.32984	0.2732	3.14629	12.216	0	0.0236919
NC_006088.4	165140490	165140682	NC_006088.4.90000001-180000000.222546	0.31913	0.27047	2.87154	11.3714	0	0.0373116
NC_006088.4	165230152	165230335	NC_006088.4.90000001-180000000.222850	0.33382	0.28307	2.84334	11.5066	0	0.0314832
NC_006088.4	165276441	165276939	NC_006088.4.90000001-180000000.223063	0.25627	0.21013	3.28814	32.7184	0	0
NC_006088.4	165322537	165322889	NC_006088.4.90000001-180000000.223225	0.24167	0.20564	2.79952	15.8863	0	0.00478024
NC_006088.4	165538785	165539065	NC_006088.4.90000001-180000000.224257	0.22355	0.17916	3.57246	19.6253	0	0
NC_006088.4	165619544	165619650	NC_006088.4.90000001-180000000.224689	0.43199	0.33721	3.92108	17.096	0	0.00179387
NC_006088.4	166434975	166435089	NC_006088.4.90000001-180000000.227726	0.32341	0.25643	3.63052	11.8216	0	0.0278711
NC_006088.4	166533509	166533637	NC_006088.4.90000001-180000000.228141	0.09559	0.05793	7.76489	13.1458	0	0.0177263
NC_006088.4	166568532	166568685	NC_006088.4.90000001-180000000.228307	0.41531	0.3462	3.06418	13.9926	0	0.0104502
NC_006088.4	167494695	167494899	NC_006088.4.90000001-180000000.232824	0.25221	0.20892	3.11888	11.7575	0	0.0298628
NC_006088.4	167858573	167858797	NC_006088.4.90000001-180000000.234293	0.2713	0.22756	2.97428	13.0827	0	0.0186716
NC_006088.4	167895082	167895245	NC_006088.4.90000001-180000000.234468	0.3219	0.26457	3.2418	13.5411	0	0.0127473
NC_006088.4	169488906	169489187	NC_006088.4.90000001-180000000.239558	0.25269	0.20311	3.50922	21.3761	0	0
NC_006088.4	169601978	169602401	NC_006088.4.90000001-180000000.240187	0.23837	0.20792	2.50522	14.7381	0	0.00783237
NC_006088.4	169933765	169934048	NC_006088.4.90000001-180000000.241648	0.34237	0.29435	2.98333	17.4788	0	0.00179387
NC_006088.4	170628563	170628772	NC_006088.4.90000001-180000000.244252	0.41879	0.35941	2.70072	14.8872	0	0.00679681
NC_006088.4	171855490	171855614	NC_006088.4.90000001-180000000.248744	0.41687	0.34515	3.15336	12.2217	0	0.0236919
NC_006088.4	172933877	172934215	NC_006088.4.90000001-180000000.252139	0.25961	0.22867	2.37619	10.8682	0	0.0498067
NC_006088.4	173036247	173036407	NC_006088.4.90000001-180000000.252571	0.40672	0.32897	3.55441	19.4127	0	0
NC_006088.4	173062485	173062926	NC_006088.4.90000001-180000000.252673	0.31984	0.28743	2.14572	12.315	0	0.0236919
NC_006088.4	173224940	173225213	NC_006088.4.90000001-180000000.253395	0.29335	0.23937	3.40267	22.0114	0	0
NC_006088.4	174249062	174249230	NC_006088.4.90000001-180000000.257027	0.58302	0.49999	3.37514	17.8705	0	0.00179387
NC_006088.4	175812159	175812303	NC_006088.4.90000001-180000000.262405	0.1832	0.13593	4.62112	13.6224	0	0.0127473
NC_006088.4	175816073	175816410	NC_006088.4.90000001-180000000.262427	0.2757	0.2381	2.63631	14.6353	0	0.00783237
NC_006088.4	177002818	177002958	NC_006088.4.90000001-180000000.266495	0.38855	0.32026	3.15349	12.7098	0	0.0207695
NC_006088.4	177960665	177961057	NC_006088.4.90000001-180000000.269894	0.3502	0.30515	2.50813	18.8396	0	0
NC_006088.4	178035528	178035651	NC_006088.4.90000001-180000000.270194	0.33279	0.218	6.66186	35.43	0	0
NC_006088.4	178080894	178081415	NC_006088.4.90000001-180000000.270337	0.20995	0.18636	2.29084	12.1873	0	0.0236919
NC_006088.4	178244292	178244405	NC_006088.4.90000001-180000000.271012	0.40313	0.32221	3.499	13.0501	0	0.0195239
NC_006088.4	178273842	178274053	NC_006088.4.90000001-180000000.271145	0.29523	0.2522	2.79345	11.5388	0	0.0313782
NC_006088.4	178274096	178274197	NC_006088.4.90000001-180000000.271146	0.4353	0.35848	3.23168	11.2392	0	0.0392782
NC_006088.4	178774258	178774432	NC_006088.4.90000001-180000000.273188	0.19238	0.15054	3.91837	11.9944	0	0.0236919
NC_006088.4	180006387	180006630	NC_006088.4.180000001-196202544.29	0.34567	0.29371	3.07937	17.0798	0	0.00179387
NC_006088.4	181684092	181684312	NC_006088.4.180000001-196202544.4905	0.31918	0.27459	2.87429	12.5887	0	0.0228223
NC_006088.4	182759946	182760410	NC_006088.4.180000001-196202544.7961	0.22537	0.16463	4.85606	55.1904	0	0
NC_006088.4	184568881	184569176	NC_006088.4.180000001-196202544.11693	0.35596	0.31343	2.28369	10.9947	0	0.0452869
NC_006088.4	184732499	184732800	NC_006088.4.180000001-196202544.12115	0.30028	0.25627	2.76093	16.1508	0	0.00344405
NC_006088.4	184876862	184877242	NC_006088.4.180000001-196202544.12616	0.35036	0.31278	2.22825	13.1777	0	0.0177263
NC_006088.4	184879092	184879335	NC_006088.4.180000001-196202544.12623	0.46766	0.40216	2.73683	18.7713	0	0
NC_006088.4	184937623	184937901	NC_006088.4.180000001-196202544.12841	0.33806	0.28317	2.99483	19.4119	0	0
NC_006088.4	187521117	187521523	NC_006088.4.180000001-196202544.22653	0.2708	0.23629	2.4964	15.1868	0	0.00552615
NC_006088.4	187831642	187831861	NC_006088.4.180000001-196202544.23670	0.42649	0.37551	2.40513	11.3551	0	0.0373116
NC_006088.4	188647910	188648105	NC_006088.4.180000001-196202544.25738	0.30439	0.25753	2.88748	11.4672	0	0.0314832
NC_006088.4	189330572	189330773	NC_006088.4.180000001-196202544.28164	0.29428	0.23255	3.8549	20.522	0	0
NC_006088.4	189465895	189466107	NC_006088.4.180000001-196202544.28662	0.36334	0.2966	3.33031	20.3263	0	0
NC_006088.4	190020833	190021017	NC_006088.4.180000001-196202544.30470	0.21025	0.15884	4.34724	18.0633	0	0.00179387
NC_006088.4	190625371	190625648	NC_006088.4.180000001-196202544.32817	0.30552	0.2643	2.66803	13.4591	0	0.0135875
NC_006088.4	191824284	191824467	NC_006088.4.180000001-196202544.35847	0.3686	0.31573	2.80151	11.6266	0	0.0305082
NC_006088.4	191972165	191972299	NC_006088.4.180000001-196202544.36390	0.35322	0.28226	3.63753	15.1517	0	0.00552615
NC_006088.4	191985153	191985274	NC_006088.4.180000001-196202544.36443	0.37307	0.30237	3.41174	12.721	0	0.0207695
NC_006088.4	192126283	192126420	NC_006088.4.180000001-196202544.37178	0.20733	0.15939	4.1124	11.5432	0	0.0313782
NC_006088.4	192516217	192516381	NC_006088.4.180000001-196202544.39418	0.45203	0.37734	3.02785	15.9512	0	0.00478024
NC_006088.4	192597232	192597372	NC_006088.4.180000001-196202544.39967	0.18282	0.1365	4.35454	11.5886	0	0.0310047
NC_006088.4	192615733	192616119	NC_006088.4.180000001-196202544.40055	0.30383	0.22848	4.42345	51.4477	0	0
NC_006088.4	192652256	192652409	NC_006088.4.180000001-196202544.40244	0.37327	0.31456	2.92662	11.6456	0	0.0305082
NC_006088.4	192653587	192653775	NC_006088.4.180000001-196202544.40248	0.24798	0.20489	3.18171	11.6439	0	0.0305082
NC_006088.4	192655180	192655314	NC_006088.4.180000001-196202544.40257	0.34242	0.28114	3.25115	11.9507	0	0.0236919
NC_006088.4	193696741	193696844	NC_006088.4.180000001-196202544.44306	0.4248	0.33685	3.86686	14.4028	0	0.00873001
NC_006088.4	193923777	193924076	NC_006088.4.180000001-196202544.45253	0.31813	0.27955	2.36045	11.1286	0	0.0413656
NC_006089.4	2652456	2652586	NC_006089.4.1-90000000.7770	0.36411	0.30068	3.53326	13.094	0	0.0177263
NC_006089.4	2955716	2955876	NC_006089.4.1-90000000.8948	0.42743	0.36346	3.20551	14.4105	0	0.00873001
NC_006089.4	3083827	3084031	NC_006089.4.1-90000000.9376	0.33487	0.28604	2.88929	11.3292	0	0.038181
NC_006089.4	3151376	3151564	NC_006089.4.1-90000000.9587	0.42295	0.35912	2.75946	13.4362	0	0.0135875
NC_006089.4	4420346	4420461	NC_006089.4.1-90000000.13579	0.37559	0.30837	3.75785	11.705	0	0.0302473
NC_006089.4	5548402	5548532	NC_006089.4.1-90000000.19213	0.25791	0.20407	3.72635	11.289	0	0.0385402
NC_006089.4	5610905	5611067	NC_006089.4.1-90000000.19554	0.32858	0.27129	3.25348	12.8466	0	0.0205848
NC_006089.4	5786267	5786433	NC_006089.4.1-90000000.20494	0.36544	0.29744	3.39412	14.416	0	0.00873001
NC_006089.4	5893651	5893793	NC_006089.4.1-90000000.21075	0.42872	0.36323	3.165	12.5156	0	0.0228223
NC_006089.4	5951535	5951672	NC_006089.4.1-90000000.21474	0.37096	0.30644	3.18053	12.3534	0	0.0236919
NC_006089.4	6104319	6104465	NC_006089.4.1-90000000.22426	0.35568	0.28724	3.47981	14.8297	0	0.00679681
NC_006089.4	6772006	6772143	NC_006089.4.1-90000000.25517	0.33704	0.27777	3.31711	11.9456	0	0.0236919
NC_006089.4	6819428	6819678	NC_006089.4.1-90000000.25821	0.21213	0.17452	3.22811	13.5191	0	0.0127473
NC_006089.4	6978707	6978824	NC_006089.4.1-90000000.26403	0.30651	0.24258	3.76579	11.944	0	0.0236919
NC_006089.4	8221875	8221994	NC_006089.4.1-90000000.31705	0.20899	0.15352	4.73058	12.6565	0	0.0207695
NC_006089.4	8326117	8326605	NC_006089.4.1-90000000.32198	0.16994	0.14322	2.93095	17.4871	0	0.00179387
NC_006089.4	8790298	8790478	NC_006089.4.1-90000000.34138	0.29735	0.24056	3.34906	14.0913	0	0.0104502
NC_006089.4	9059554	9059745	NC_006089.4.1-90000000.35544	0.16431	0.12773	3.94386	11.5539	0	0.0313782
NC_006089.4	9136676	9137341	NC_006089.4.1-90000000.35929	0.14762	0.12705	2.67693	16.3667	0	0.00179387
NC_006089.4	9193824	9194144	NC_006089.4.1-90000000.36142	0.28858	0.24255	3.01094	19.4559	0	0
NC_006089.4	9360573	9360762	NC_006089.4.1-90000000.36781	0.39481	0.33315	2.95307	14.7238	0	0.00783237
NC_006089.4	9811435	9811649	NC_006089.4.1-90000000.38120	0.42946	0.3416	3.49163	20.5046	0	0
NC_006089.4	11167401	11167795	NC_006089.4.1-90000000.43705	0.26322	0.23187	2.40816	12.4444	0	0.0234278
NC_006089.4	11171156	11171338	NC_006089.4.1-90000000.43709	0.24233	0.20132	3.50364	11.6652	0	0.0305082
NC_006089.4	11180568	11180814	NC_006089.4.1-90000000.43739	0.31965	0.27485	2.69094	12.7164	0	0.0207695
NC_006089.4	11245185	11245932	NC_006089.4.1-90000000.43860	0.11287	0.09891	2.44787	11.3091	0	0.038181
NC_006089.4	11576384	11576541	NC_006089.4.1-90000000.44926	0.48506	0.42117	2.55458	10.9787	0	0.0452869
NC_006089.4	12062099	12062300	NC_006089.4.1-90000000.46879	0.42077	0.36841	2.6092	11.5559	0	0.0313782
NC_006089.4	12117336	12117480	NC_006089.4.1-90000000.47060	0.36534	0.29694	3.38924	14.7842	0	0.00783237
NC_006089.4	12151885	12152105	NC_006089.4.1-90000000.47157	0.39026	0.3379	2.5793	12.9101	0	0.0200656
NC_006089.4	12224886	12224995	NC_006089.4.1-90000000.47356	0.54148	0.46438	3.17115	10.9549	0	0.0472945
NC_006089.4	12285179	12285387	NC_006089.4.1-90000000.47545	0.33581	0.27675	3.18345	16.3777	0	0.00179387
NC_006089.4	12323081	12323247	NC_006089.4.1-90000000.47685	0.31638	0.26296	3.04038	11.9475	0	0.0236919
NC_006089.4	12473925	12474109	NC_006089.4.1-90000000.48173	0.43064	0.37406	2.57003	11.1323	0	0.0413656
NC_006089.4	12479525	12479726	NC_006089.4.1-90000000.48194	0.34021	0.28234	3.41689	17.4557	0	0.00179387
NC_006089.4	12581019	12581231	NC_006089.4.1-90000000.48515	0.39937	0.34529	2.60671	12.8659	0	0.0205848
NC_006089.4	12649827	12650015	NC_006089.4.1-90000000.48805	0.42405	0.35958	2.83464	14.7746	0	0.00783237
NC_006089.4	12828057	12828171	NC_006089.4.1-90000000.49641	0.38692	0.29961	4.03253	15.0022	0	0.00552615
NC_006089.4	13285425	13285575	NC_006089.4.1-90000000.51173	0.40462	0.33334	3.22163	15.0416	0	0.00552615
NC_006089.4	13357959	13358144	NC_006089.4.1-90000000.51486	0.30452	0.25337	3.05983	12.4439	0	0.0234278
NC_006089.4	13802596	13802752	NC_006089.4.1-90000000.54127	0.30646	0.24526	3.5752	14.8453	0	0.00679681
NC_006089.4	13841150	13841282	NC_006089.4.1-90000000.54366	0.3112	0.24168	3.97502	15.7519	0	0.00478024
NC_006089.4	13841284	13841397	NC_006089.4.1-90000000.54367	0.31754	0.24705	4.48092	15.3343	0	0.00552615
NC_006089.4	13870026	13870340	NC_006089.4.1-90000000.54515	0.39005	0.34821	2.22979	11.9428	0	0.0236919
NC_006089.4	15174006	15174448	NC_006089.4.1-90000000.60793	0.25176	0.21506	2.7612	19.7625	0	0
NC_006089.4	15239567	15239746	NC_006089.4.1-90000000.61191	0.35436	0.32528	8.58993	15.5505	0	0.00552615
NC_006089.4	15243310	15243445	NC_006089.4.1-90000000.61219	0.43952	0.35791	3.18545	14.1808	0	0.0104502
NC_006089.4	15257947	15258057	NC_006089.4.1-90000000.61295	0.40712	0.31895	3.86384	15.792	0	0.00478024
NC_006089.4	15259222	15259594	NC_006089.4.1-90000000.61301	0.17855	0.15016	2.95776	14.1025	0	0.0104502
NC_006089.4	16124692	16124797	NC_006089.4.1-90000000.65191	0.32631	0.24682	4.40774	15.378	0	0.00552615
NC_006089.4	16133352	16133452	NC_006089.4.1-90000000.65218	0.29491	0.21883	4.36053	12.6719	0	0.0207695
NC_006089.4	21378469	21378749	NC_006089.4.1-90000000.84319	0.21257	0.17627	2.9728	12.4433	0	0.0234278
NC_006089.4	21452581	21452733	NC_006089.4.1-90000000.84573	0.43338	0.36291	2.78972	11.5517	0	0.0313782
NC_006089.4	22229889	22230159	NC_006089.4.1-90000000.87554	0.29207	0.23377	3.60684	25.0411	0	0
NC_006089.4	22270880	22270986	NC_006089.4.1-90000000.87744	0.37613	0.29235	3.81671	13.4663	0	0.0135875
NC_006089.4	23354834	23354977	NC_006089.4.1-90000000.91535	0.31669	0.26399	3.48945	12.053	0	0.0236919
NC_006089.4	24243810	24243974	NC_006089.4.1-90000000.95127	0.37604	0.31948	2.91069	11.441	0	0.0314832
NC_006089.4	25076708	25076848	NC_006089.4.1-90000000.98582	0.28818	0.23126	3.66845	13.1025	0	0.0177263
NC_006089.4	25082614	25082853	NC_006089.4.1-90000000.98615	0.34962	0.30222	2.62771	12.7895	0	0.0207695
NC_006089.4	25214017	25214228	NC_006089.4.1-90000000.99115	0.36898	0.31539	2.76766	13.5903	0	0.0127473
NC_006089.4	25387791	25388152	NC_006089.4.1-90000000.99726	0.37303	0.3358	2.13154	11.3418	0	0.037863
NC_006089.4	25971502	25971619	NC_006089.4.1-90000000.101404	0.47937	0.38386	3.53973	16.4574	0	0.00179387
NC_006089.4	26375258	26375450	NC_006089.4.1-90000000.102738	0.35926	0.31037	2.69413	10.9036	0	0.0477371
NC_006089.4	27166763	27167224	NC_006089.4.1-90000000.105098	0.31786	0.28084	2.35634	16.9445	0	0.00179387
NC_006089.4	27279217	27279345	NC_006089.4.1-90000000.105475	0.43096	0.35707	3.07159	12.0785	0	0.0236919
NC_006089.4	27298584	27298733	NC_006089.4.1-90000000.105548	0.27126	0.21719	3.56798	12.5613	0	0.0228223
NC_006089.4	27350710	27351149	NC_006089.4.1-90000000.105821	0.21238	0.18675	2.4019	11.6185	0	0.0310047
NC_006089.4	27386209	27386518	NC_006089.4.1-90000000.106056	0.18824	0.14849	3.75828	20.3689	0	0
NC_006089.4	27505965	27506150	NC_006089.4.1-90000000.106583	0.42325	0.36454	2.64111	10.9933	0	0.0452869
NC_006089.4	27844313	27844456	NC_006089.4.1-90000000.107440	0.46266	0.38236	3.04145	14.7492	0	0.00783237
NC_006089.4	27930111	27930260	NC_006089.4.1-90000000.107678	0.21147	0.16284	3.9764	12.0981	0	0.0236919
NC_006089.4	28117419	28117554	NC_006089.4.1-90000000.108420	0.37271	0.29444	3.41747	13.3205	0	0.0144011
NC_006089.4	28267070	28267401	NC_006089.4.1-90000000.109262	0.17	0.14287	2.86133	11.2543	0	0.0392782
NC_006089.4	28763888	28764313	NC_006089.4.1-90000000.111134	0.3345	0.30251	2.08349	11.3107	0	0.038181
NC_006089.4	28765036	28765136	NC_006089.4.1-90000000.111141	0.45622	0.36552	3.51607	13.5926	0	0.0127473
NC_006089.4	29148555	29148725	NC_006089.4.1-90000000.112365	0.30077	0.24102	3.6288	15.7329	0	0.00478024
NC_006089.4	29210824	29210932	NC_006089.4.1-90000000.112521	0.42671	0.35175	3.35706	10.8689	0	0.0498067
NC_006089.4	29265763	29265922	NC_006089.4.1-90000000.112660	0.42016	0.36028	2.7602	11.321	0	0.038181
NC_006089.4	29465547	29465669	NC_006089.4.1-90000000.113591	0.31646	0.22906	5.17228	22.1451	0	0
NC_006089.4	29528506	29528704	NC_006089.4.1-90000000.113882	0.40732	0.34155	3.17658	17.7164	0	0.00179387
NC_006089.4	29557014	29557406	NC_006089.4.1-90000000.113999	0.20029	0.17096	2.82166	13.8318	0	0.0125126
NC_006089.4	29564058	29564486	NC_006089.4.1-90000000.114021	0.27673	0.23692	2.85604	20.301	0	0
NC_006089.4	29667461	29667904	NC_006089.4.1-90000000.114534	0.30439	0.26668	2.43614	18.3845	0	0
NC_006089.4	29718444	29719410	NC_006089.4.1-90000000.114761	0.16923	0.15224	2.14404	14.9537	0	0.00552615
NC_006089.4	30168663	30168855	NC_006089.4.1-90000000.116507	0.29453	0.24678	3.01074	12.5758	0	0.0228223
NC_006089.4	30181043	30181204	NC_006089.4.1-90000000.116546	0.36274	0.30191	3.08168	13.3706	0	0.0144011
NC_006089.4	30245579	30245717	NC_006089.4.1-90000000.116769	0.37187	0.29899	3.53829	16.0908	0	0.00344405
NC_006089.4	30275014	30275418	NC_006089.4.1-90000000.116887	0.13556	0.11197	3.16314	13.5578	0	0.0127473
NC_006089.4	30284936	30285155	NC_006089.4.1-90000000.116927	0.40213	0.34593	2.65773	13.8834	0	0.0125126
NC_006089.4	30304684	30305665	NC_006089.4.1-90000000.116977	0.13292	0.11918	2.18384	12.6154	0	0.0223803
NC_006089.4	30313641	30314234	NC_006089.4.1-90000000.117002	0.05622	0.04251	4.31659	15.1002	0	0.00552615
NC_006089.4	30327523	30328205	NC_006089.4.1-90000000.117048	0.08745	0.07274	3.08387	14.2554	0	0.00990204
NC_006089.4	30339511	30340294	NC_006089.4.1-90000000.117119	0.12528	0.10741	2.71209	17.3523	0	0.00179387
NC_006089.4	30349612	30350429	NC_006089.4.1-90000000.117170	0.04734	0.03822	3.45873	11.7162	0	0.0302473
NC_006089.4	30382445	30382706	NC_006089.4.1-90000000.117272	0.34796	0.30193	2.6825	13.9682	0	0.0104502
NC_006089.4	30422066	30422436	NC_006089.4.1-90000000.117443	0.29748	0.25098	2.91287	21.8264	0	0
NC_006089.4	30426023	30426374	NC_006089.4.1-90000000.117458	0.12286	0.09314	4.30936	19.1227	0	0
NC_006089.4	30429777	30429970	NC_006089.4.1-90000000.117474	0.31764	0.26685	2.95191	13.2694	0	0.0151455
NC_006089.4	30515902	30517207	NC_006089.4.1-90000000.117741	0.16444	0.1465	2.30666	23.0582	0	0
NC_006089.4	30589480	30589934	NC_006089.4.1-90000000.117860	0.15239	0.12646	3.10957	16.736	0	0.00179387
NC_006089.4	30590335	30590653	NC_006089.4.1-90000000.117865	0.20016	0.15707	3.84179	22.8199	0	0
NC_006089.4	30593505	30593710	NC_006089.4.1-90000000.117868	0.29194	0.2413	3.14146	14.1218	0	0.0104502
NC_006089.4	30593711	30593954	NC_006089.4.1-90000000.117869	0.19455	0.15246	3.81497	16.6506	0	0.00179387
NC_006089.4	30607551	30608107	NC_006089.4.1-90000000.117903	0.17377	0.13835	3.59553	30.5487	0	0
NC_006089.4	30614580	30615009	NC_006089.4.1-90000000.117922	0.16056	0.13356	3.03331	15.3338	0	0.00552615
NC_006089.4	30631036	30631458	NC_006089.4.1-90000000.117963	0.15899	0.13564	2.723	11.6944	0	0.0302473
NC_006089.4	30666937	30667359	NC_006089.4.1-90000000.118098	0.27949	0.24113	2.63177	18.6106	0	0
NC_006089.4	30695975	30696520	NC_006089.4.1-90000000.118225	0.05679	0.03672	6.66018	27.0725	0	0
NC_006089.4	31220323	31220484	NC_006089.4.1-90000000.119986	0.25311	0.19675	4.0069	15.4556	0	0.00552615
NC_006089.4	31220487	31220629	NC_006089.4.1-90000000.119987	0.23723	0.18756	3.7684	11.4363	0	0.0321823
NC_006089.4	31872667	31872875	NC_006089.4.1-90000000.122339	0.33946	0.28992	2.77099	12.6832	0	0.0207695
NC_006089.4	32024372	32024494	NC_006089.4.1-90000000.123234	0.30958	0.2441	3.78304	12.9785	0	0.0200656
NC_006089.4	32033164	32033387	NC_006089.4.1-90000000.123309	0.11258	0.08658	4.5687	11.3132	0	0.038181
NC_006089.4	32217746	32218326	NC_006089.4.1-90000000.124260	0.20717	0.17366	2.98441	25.9446	0	0
NC_006089.4	32359658	32360004	NC_006089.4.1-90000000.124892	0.3594	0.32143	2.19756	11.917	0	0.0236919
NC_006089.4	32424395	32424687	NC_006089.4.1-90000000.125303	0.33302	0.29338	2.39613	11.9811	0	0.0236919
NC_006089.4	32663282	32663510	NC_006089.4.1-90000000.126638	0.18758	0.15356	3.36325	11.749	0	0.0298628
NC_006089.4	34919498	34919658	NC_006089.4.1-90000000.137377	0.43287	0.36327	2.70922	10.8984	0	0.0477371
NC_006089.4	35121556	35121696	NC_006089.4.1-90000000.138265	0.27841	0.19299	5.67728	24.5965	0	0
NC_006089.4	35121993	35122188	NC_006089.4.1-90000000.138271	0.3058	0.25498	3.07497	13.3655	0	0.0144011
NC_006089.4	35142509	35142781	NC_006089.4.1-90000000.138361	0.35955	0.31213	2.80381	14.4784	0	0.00873001
NC_006089.4	35148428	35148823	NC_006089.4.1-90000000.138396	0.26772	0.23134	2.59506	15.9666	0	0.00478024
NC_006089.4	35191589	35191734	NC_006089.4.1-90000000.138618	0.39109	0.32118	3.21672	14.158	0	0.0104502
NC_006089.4	35549721	35549911	NC_006089.4.1-90000000.140392	0.35578	0.30161	2.99639	13.6814	0	0.0127473
NC_006089.4	36251560	36251813	NC_006089.4.1-90000000.141888	0.29183	0.25055	2.67263	12.2313	0	0.0236919
NC_006089.4	36399421	36399545	NC_006089.4.1-90000000.142304	0.16094	0.11805	5.37829	11.6979	0	0.0302473
NC_006089.4	36945868	36946526	NC_006089.4.1-90000000.143920	0.11979	0.10112	3.07835	17.1129	0	0.00179387
NC_006089.4	37090012	37090263	NC_006089.4.1-90000000.144605	0.2835	0.24408	2.65075	11.4153	0	0.0335011
NC_006089.4	37117954	37118152	NC_006089.4.1-90000000.144738	0.36197	0.30232	3.03525	15.3027	0	0.00552615
NC_006089.4	37818165	37818433	NC_006089.4.1-90000000.148330	0.30099	0.24309	3.61026	23.8326	0	0
NC_006089.4	37830055	37830535	NC_006089.4.1-90000000.148413	0.08708	0.06706	4.08657	16.9882	0	0.00179387
NC_006089.4	37832946	37833158	NC_006089.4.1-90000000.148427	0.21823	0.17898	3.25235	11.9546	0	0.0236919
NC_006089.4	38403135	38403439	NC_006089.4.1-90000000.150630	0.33272	0.28589	2.57562	14.4966	0	0.00873001
NC_006089.4	38608466	38608645	NC_006089.4.1-90000000.151232	0.20988	0.16824	3.50034	11.7981	0	0.0285898
NC_006089.4	38618240	38618467	NC_006089.4.1-90000000.151267	0.42572	0.34014	3.64169	29.0218	0	0
NC_006089.4	38777747	38777865	NC_006089.4.1-90000000.151788	0.36745	0.29897	3.41136	12.3214	0	0.0236919
NC_006089.4	39023933	39024134	NC_006089.4.1-90000000.152624	0.30297	0.25126	3.10505	13.5139	0	0.0127473
NC_006089.4	39098600	39098770	NC_006089.4.1-90000000.153088	0.38837	0.32261	3.12923	15.2458	0	0.00552615
NC_006089.4	39112120	39112467	NC_006089.4.1-90000000.153171	0.31622	0.26958	2.77795	19.5316	0	0
NC_006089.4	39138490	39138648	NC_006089.4.1-90000000.153370	0.41401	0.34879	2.92482	13.3882	0	0.0144011
NC_006089.4	39272427	39272707	NC_006089.4.1-90000000.154040	0.33292	0.28222	2.94145	18.6803	0	0
NC_006089.4	39329566	39329711	NC_006089.4.1-90000000.154414	0.43214	0.35368	3.30786	16.3876	0	0.00179387
NC_006089.4	39455059	39455197	NC_006089.4.1-90000000.155062	0.3105	0.25369	3.3351	11.5324	0	0.0313782
NC_006089.4	39574552	39574704	NC_006089.4.1-90000000.155734	0.44163	0.35896	3.40395	17.9274	0	0.00179387
NC_006089.4	39643567	39643891	NC_006089.4.1-90000000.156061	0.26698	0.23266	2.60937	12.7348	0	0.0207695
NC_006089.4	39651928	39652122	NC_006089.4.1-90000000.156105	0.22032	0.17586	3.67202	14.0535	0	0.0104502
NC_006089.4	39725347	39725566	NC_006089.4.1-90000000.156561	0.1737	0.13987	3.49846	11.3906	0	0.0367743
NC_006089.4	39809351	39809662	NC_006089.4.1-90000000.156901	0.29627	0.25194	2.84288	16.9848	0	0.00179387
NC_006089.4	39844187	39844545	NC_006089.4.1-90000000.157008	0.40961	0.36007	2.40447	18.1803	0	0.00179387
NC_006089.4	40164485	40164784	NC_006089.4.1-90000000.158591	0.38158	0.33258	2.52251	15.7486	0	0.00478024
NC_006089.4	40706989	40707520	NC_006089.4.1-90000000.160657	0.22226	0.19907	2.20339	11.2321	0	0.0392782
NC_006089.4	40710365	40710758	NC_006089.4.1-90000000.160672	0.27816	0.24206	2.53098	16.1582	0	0.00344405
NC_006089.4	40856878	40857223	NC_006089.4.1-90000000.161198	0.25459	0.22269	2.45967	12.1521	0	0.0236919
NC_006089.4	40861785	40862217	NC_006089.4.1-90000000.161229	0.24849	0.2155	2.58517	16.2345	0	0.00344405
NC_006089.4	40876927	40877311	NC_006089.4.1-90000000.161315	0.23062	0.19427	2.92586	18.1007	0	0.00179387
NC_006089.4	41134314	41134654	NC_006089.4.1-90000000.162354	0.16513	0.13262	3.54856	17.6255	0	0.00179387
NC_006089.4	41210853	41211123	NC_006089.4.1-90000000.162634	0.23617	0.20063	2.81489	12.0252	0	0.0236919
NC_006089.4	41215497	41215679	NC_006089.4.1-90000000.162675	0.33348	0.27705	3.3577	15.2969	0	0.00552615
NC_006089.4	41232502	41232681	NC_006089.4.1-90000000.162775	0.30835	0.259	3.27801	12.7582	0	0.0207695
NC_006089.4	41984075	41984267	NC_006089.4.1-90000000.165365	0.39181	0.33039	2.92218	15.1607	0	0.00552615
NC_006089.4	43123306	43123517	NC_006089.4.1-90000000.169363	0.37388	0.31289	3.60359	18.9913	0	0
NC_006089.4	43462278	43462400	NC_006089.4.1-90000000.170772	0.47388	0.39994	3.13039	11.0327	0	0.0451944
NC_006089.4	43589995	43590158	NC_006089.4.1-90000000.171580	0.29208	0.24045	3.23605	12.3145	0	0.0236919
NC_006089.4	44157880	44158128	NC_006089.4.1-90000000.173320	0.17102	0.13979	3.3408	11.6256	0	0.0305082
NC_006089.4	44464357	44464572	NC_006089.4.1-90000000.174133	0.2445	0.20077	3.23476	13.4783	0	0.0135875
NC_006089.4	45137186	45137391	NC_006089.4.1-90000000.176255	0.31292	0.24499	3.73994	21.0121	0	0
NC_006089.4	46305660	46305777	NC_006089.4.1-90000000.180350	0.25356	0.18609	4.61029	14.0967	0	0.0104502
NC_006089.4	49572988	49573098	NC_006089.4.1-90000000.191724	0.41517	0.34082	3.3701	11.2761	0	0.0385402
NC_006089.4	49630607	49630742	NC_006089.4.1-90000000.191972	0.52778	0.43642	3.18464	14.3298	0	0.00873001
NC_006089.4	50120277	50120934	NC_006089.4.1-90000000.193686	0.11224	0.08403	4.48606	31.0165	0	0
NC_006089.4	50264684	50265032	NC_006089.4.1-90000000.194076	0.34012	0.28229	3.15311	26.5091	0	0
NC_006089.4	50503243	50503344	NC_006089.4.1-90000000.195032	0.44584	0.324	4.94705	22.9731	0	0
NC_006089.4	50694539	50694717	NC_006089.4.1-90000000.195817	0.34443	0.28091	3.15359	14.4164	0	0.00873001
NC_006089.4	50871457	50871722	NC_006089.4.1-90000000.196843	0.19708	0.16269	3.49846	13.4321	0	0.0135875
NC_006089.4	50878567	50878757	NC_006089.4.1-90000000.196898	0.38317	0.31517	3.07893	15.8323	0	0.00478024
NC_006089.4	51070787	51070962	NC_006089.4.1-90000000.197843	0.29316	0.23809	3.25607	12.4667	0	0.0234278
NC_006089.4	51232052	51232260	NC_006089.4.1-90000000.198594	0.29521	0.24656	2.9404	12.7396	0	0.0207695
NC_006089.4	52315656	52315765	NC_006089.4.1-90000000.202390	0.35527	0.28717	3.41682	10.9633	0	0.0464089
NC_006089.4	52852262	52852497	NC_006089.4.1-90000000.202411	0.37263	0.3266	2.44827	11.2513	0	0.0392782
NC_006089.4	52864853	52865088	NC_006089.4.1-90000000.202439	0.37263	0.3266	2.44827	11.2513	0	0.0392782
NC_006089.4	57142444	57142631	NC_006089.4.1-90000000.209204	0.34329	0.28849	2.80845	11.4793	0	0.0314832
NC_006089.4	59967173	59967389	NC_006089.4.1-90000000.217868	0.40238	0.34392	2.90432	15.8964	0	0.00478024
NC_006089.4	60202678	60203171	NC_006089.4.1-90000000.218919	0.22772	0.20099	2.37452	13.5707	0	0.0127473
NC_006089.4	60283943	60284100	NC_006089.4.1-90000000.219395	0.16704	0.12708	4.21945	11.2951	0	0.0385402
NC_006089.4	61037392	61037572	NC_006089.4.1-90000000.222674	0.1729	0.13436	3.96702	11.6011	0	0.0310047
NC_006089.4	61593344	61593547	NC_006089.4.1-90000000.225589	0.26122	0.21371	3.78827	15.9399	0	0.00478024
NC_006089.4	62199278	62199482	NC_006089.4.1-90000000.228954	0.38118	0.32876	2.61041	12.2911	0	0.0236919
NC_006089.4	63804673	63804952	NC_006089.4.1-90000000.235655	0.25287	0.21162	2.97836	15.6278	0	0.00552615
NC_006089.4	63945006	63945149	NC_006089.4.1-90000000.236304	0.1584	0.11721	4.7958	12.3062	0	0.0236919
NC_006089.4	63952185	63952412	NC_006089.4.1-90000000.236334	0.26439	0.22515	2.80842	10.9907	0	0.0452869
NC_006089.4	63990998	63991381	NC_006089.4.1-90000000.236538	0.2435	0.21225	2.52775	13.6497	0	0.0127473
NC_006089.4	64096506	64096688	NC_006089.4.1-90000000.237059	0.41756	0.35877	2.66649	12.1132	0	0.0236919
NC_006089.4	64166808	64166913	NC_006089.4.1-90000000.237362	0.51875	0.42815	3.19117	13.1799	0	0.0177263
NC_006089.4	64177035	64177421	NC_006089.4.1-90000000.237404	0.15321	0.12821	3.0237	13.0981	0	0.0177263
NC_006089.4	64253288	64253417	NC_006089.4.1-90000000.237722	0.36028	0.2917	3.42396	13.0507	0	0.0195239
NC_006089.4	64380629	64380792	NC_006089.4.1-90000000.238104	0.23112	0.16926	4.7895	19.864	0	0
NC_006089.4	64416436	64417007	NC_006089.4.1-90000000.238233	0.15439	0.13295	2.6538	14.5636	0	0.00873001
NC_006089.4	66858401	66858554	NC_006089.4.1-90000000.248558	0.46013	0.38992	3.13219	13.462	0	0.0135875
NC_006089.4	66864846	66864990	NC_006089.4.1-90000000.248580	0.43193	0.34847	3.60663	18.891	0	0
NC_006089.4	67305352	67305704	NC_006089.4.1-90000000.250745	0.33345	0.28671	2.72313	19.3311	0	0
NC_006089.4	67675221	67675328	NC_006089.4.1-90000000.252572	0.41908	0.34894	3.48784	11.0789	0	0.0430282
NC_006089.4	68878030	68878237	NC_006089.4.1-90000000.257830	0.38197	0.30991	3.37231	21.5554	0	0
NC_006089.4	68923102	68923263	NC_006089.4.1-90000000.258106	0.38815	0.31569	3.66557	17.9398	0	0.00179387
NC_006089.4	68986834	68987061	NC_006089.4.1-90000000.258476	0.31334	0.26	3.13076	16.4455	0	0.00179387
NC_006089.4	69068737	69068855	NC_006089.4.1-90000000.258810	0.36783	0.29302	3.65259	13.7229	0	0.0127473
NC_006089.4	69449612	69449836	NC_006089.4.1-90000000.259608	0.26474	0.22453	2.86929	11.0346	0	0.0451944
NC_006089.4	69535661	69535955	NC_006089.4.1-90000000.259959	0.28749	0.23351	3.3933	23.5932	0	0
NC_006089.4	69662148	69662304	NC_006089.4.1-90000000.260689	0.36467	0.30581	2.95004	11.4279	0	0.0335011
NC_006089.4	69722238	69722405	NC_006089.4.1-90000000.260954	0.33259	0.27775	3.03016	12.3018	0	0.0236919
NC_006089.4	69739872	69740039	NC_006089.4.1-90000000.261029	0.43605	0.36914	2.86995	13.8737	0	0.0125126
NC_006089.4	69740580	69740817	NC_006089.4.1-90000000.261033	0.37743	0.32315	2.75079	14.875	0	0.00679681
NC_006089.4	69746219	69746425	NC_006089.4.1-90000000.261041	0.32286	0.2657	3.32407	17.5276	0	0.00179387
NC_006089.4	69754725	69754937	NC_006089.4.1-90000000.261077	0.31365	0.26676	2.90799	12.7155	0	0.0207695
NC_006089.4	69790801	69791169	NC_006089.4.1-90000000.261211	0.34195	0.27739	3.40422	35.005	0	0
NC_006089.4	69837712	69837875	NC_006089.4.1-90000000.261383	0.31086	0.25727	3.14429	12.0584	0	0.0236919
NC_006089.4	69864295	69864572	NC_006089.4.1-90000000.261474	0.20887	0.16537	3.71764	19.605	0	0
NC_006089.4	69986590	69986719	NC_006089.4.1-90000000.261800	0.38262	0.31423	3.2449	12.3174	0	0.0236919
NC_006089.4	70039268	70039534	NC_006089.4.1-90000000.261959	0.27033	0.23062	2.76875	13.0004	0	0.0200656
NC_006089.4	70047122	70047225	NC_006089.4.1-90000000.261976	0.45401	0.34776	4.77991	20.8456	0	0
NC_006089.4	70074667	70075084	NC_006089.4.1-90000000.262036	0.39779	0.35744	2.14947	14.3472	0	0.00873001
NC_006089.4	70428861	70429109	NC_006089.4.1-90000000.262727	0.2604	0.22256	2.73937	11.4665	0	0.0314832
NC_006089.4	72525861	72526253	NC_006089.4.1-90000000.266281	0.25642	0.22296	2.5591	14.7962	0	0.00783237
NC_006089.4	73407070	73407194	NC_006089.4.1-90000000.267569	0.46884	0.35032	4.16401	20.0505	0	0
NC_006089.4	75504075	75504193	NC_006089.4.1-90000000.270200	0.40113	0.30536	4.34282	20.9184	0	0
NC_006089.4	78203843	78204018	NC_006089.4.1-90000000.277265	0.38831	0.33353	2.69734	11.1913	0	0.0404367
NC_006089.4	79793786	79793918	NC_006089.4.1-90000000.281204	0.43648	0.36728	3.11868	12.1525	0	0.0236919
NC_006089.4	80347536	80347762	NC_006089.4.1-90000000.282369	0.39912	0.34993	2.4458	11.2044	0	0.0392782
NC_006089.4	82260315	82260455	NC_006089.4.1-90000000.287530	0.44377	0.35769	3.14828	13.4027	0	0.0135875
NC_006089.4	82480208	82480340	NC_006089.4.1-90000000.287867	0.32548	0.26063	3.38852	11.6154	0	0.0310047
NC_006089.4	82721929	82722060	NC_006089.4.1-90000000.288195	0.47052	0.37567	2.99271	11.4801	0	0.0314832
NC_006089.4	83888266	83888394	NC_006089.4.1-90000000.291266	0.48523	0.38801	3.56596	18.443	0	0
NC_006089.4	84014856	84014987	NC_006089.4.1-90000000.291880	0.3433	0.24997	4.90602	24.1908	0	0
NC_006089.4	85321366	85321564	NC_006089.4.1-90000000.296127	0.40344	0.34568	2.66571	12.7076	0	0.0207695
NC_006089.4	86375468	86375654	NC_006089.4.1-90000000.299344	0.34971	0.28424	3.91945	20.2275	0	0
NC_006089.4	86461426	86461556	NC_006089.4.1-90000000.299625	0.36885	0.30559	3.19037	11.6796	0	0.0305082
NC_006089.4	86473512	86473634	NC_006089.4.1-90000000.299666	0.3426	0.27476	3.58706	12.9394	0	0.0200656
NC_006089.4	86938820	86939050	NC_006089.4.1-90000000.301088	0.27395	0.21912	3.59759	18.8307	0	0
NC_006089.4	87162955	87163163	NC_006089.4.1-90000000.301749	0.29644	0.2491	2.96145	12.6106	0	0.0223803
NC_006089.4	87221638	87221846	NC_006089.4.1-90000000.301870	0.28523	0.23796	3.0577	13.6365	0	0.0127473
NC_006089.4	87321056	87321267	NC_006089.4.1-90000000.302156	0.36883	0.31495	2.59145	11.4204	0	0.0335011
NC_006089.4	87361580	87361878	NC_006089.4.1-90000000.302293	0.24375	0.20982	2.67805	12.3323	0	0.0236919
NC_006089.4	87501081	87501544	NC_006089.4.1-90000000.302815	0.31873	0.28234	2.35443	17.0005	0	0.00179387
NC_006089.4	87762025	87762217	NC_006089.4.1-90000000.303562	0.24771	0.20295	3.28264	12.5629	0	0.0228223
NC_006089.4	87916069	87916628	NC_006089.4.1-90000000.304120	0.22214	0.19839	2.22367	12.522	0	0.0228223
NC_006089.4	88021990	88022190	NC_006089.4.1-90000000.304469	0.24333	0.20322	3.05919	11.0167	0	0.0452869
NC_006089.4	88097402	88097507	NC_006089.4.1-90000000.304736	0.39873	0.30826	4.1222	16.4996	0	0.00179387
NC_006089.4	88592653	88592791	NC_006089.4.1-90000000.306237	0.41315	0.34566	3.02008	12.4785	0	0.0228223
NC_006089.4	88781973	88782116	NC_006089.4.1-90000000.306912	0.31039	0.24867	3.62981	12.8894	0	0.0205848
NC_006089.4	89074963	89075090	NC_006089.4.1-90000000.307989	0.55091	0.45954	2.72037	10.9511	0	0.0472945
NC_006089.4	89379263	89379386	NC_006089.4.1-90000000.309151	0.37419	0.29451	3.7889	15.4639	0	0.00552615
NC_006089.4	90282752	90282893	NC_006089.4.90000001-149560735.1119	0.17565	0.1252	5.19291	15.1636	0	0.00552615
NC_006089.4	90383411	90383544	NC_006089.4.90000001-149560735.1443	0.53232	0.44419	3.00583	14.9373	0	0.00552615
NC_006089.4	90405145	90405352	NC_006089.4.90000001-149560735.1540	0.45055	0.38324	3.06707	17.5526	0	0.00179387
NC_006089.4	90840628	90840767	NC_006089.4.90000001-149560735.2744	0.47891	0.40698	2.92364	12.6933	0	0.0207695
NC_006089.4	91199764	91199969	NC_006089.4.90000001-149560735.4428	0.28776	0.24102	3.01804	13.0108	0	0.0200656
NC_006089.4	91209077	91209191	NC_006089.4.90000001-149560735.4495	0.12596	0.05549	14.5015	27.391	0	0
NC_006089.4	91237822	91237957	NC_006089.4.90000001-149560735.4663	0.32636	0.26847	3.24959	11.5502	0	0.0313782
NC_006089.4	91325285	91325548	NC_006089.4.90000001-149560735.5162	0.2434	0.20426	3.04046	13.7296	0	0.0127473
NC_006089.4	91411128	91411302	NC_006089.4.90000001-149560735.5605	0.28632	0.23351	3.32762	13.5993	0	0.0127473
NC_006089.4	91431014	91431585	NC_006089.4.90000001-149560735.5698	0.22208	0.18249	3.29315	32.9227	0	0
NC_006089.4	91445214	91445356	NC_006089.4.90000001-149560735.5757	0.15565	0.09946	6.91817	20.8407	0	0
NC_006089.4	91479953	91480170	NC_006089.4.90000001-149560735.5961	0.18513	0.139	4.46425	19.2065	0	0
NC_006089.4	91622934	91623339	NC_006089.4.90000001-149560735.6772	0.23324	0.20083	2.66578	15.9003	0	0.00478024
NC_006089.4	91691786	91692132	NC_006089.4.90000001-149560735.7220	0.13233	0.10403	3.84419	16.3573	0	0.00179387
NC_006089.4	91869171	91869460	NC_006089.4.90000001-149560735.8221	0.25416	0.21169	3.05917	16.2622	0	0.00344405
NC_006089.4	92028927	92029041	NC_006089.4.90000001-149560735.8950	0.48435	0.38781	3.61547	16.4044	0	0.00179387
NC_006089.4	93014196	93014397	NC_006089.4.90000001-149560735.11180	0.3249	0.2784	2.95543	11.9592	0	0.0236919
NC_006089.4	93249111	93249327	NC_006089.4.90000001-149560735.11628	0.34484	0.28753	3.65017	19.8103	0	0
NC_006089.4	93586229	93586382	NC_006089.4.90000001-149560735.12035	0.41912	0.3366	3.3429	16.3808	0	0.00179387
NC_006089.4	94407652	94407876	NC_006089.4.90000001-149560735.13800	0.37348	0.30966	3.07381	17.815	0	0.00179387
NC_006089.4	94901940	94902098	NC_006089.4.90000001-149560735.14591	0.46403	0.39607	2.7891	12.8189	0	0.0205848
NC_006089.4	95219586	95219733	NC_006089.4.90000001-149560735.15165	0.20444	0.15566	4.29589	12.7029	0	0.0207695
NC_006089.4	95254806	95255167	NC_006089.4.90000001-149560735.15214	0.31668	0.28364	2.23561	11.1698	0	0.0413656
NC_006089.4	95482819	95483105	NC_006089.4.90000001-149560735.15606	0.28438	0.24742	2.53817	11.7648	0	0.0298628
NC_006089.4	95626688	95626795	NC_006089.4.90000001-149560735.15922	0.29944	0.22758	4.26958	13.669	0	0.0127473
NC_006089.4	95763962	95764412	NC_006089.4.90000001-149560735.16115	0.35825	0.32108	2.11393	13.1301	0	0.0177263
NC_006089.4	95804762	95805006	NC_006089.4.90000001-149560735.16187	0.42885	0.37913	2.36234	11.9401	0	0.0236919
NC_006089.4	95955506	95955847	NC_006089.4.90000001-149560735.16690	0.27796	0.24571	2.34695	11.0976	0	0.0425072
NC_006089.4	95973134	95973245	NC_006089.4.90000001-149560735.16733	0.51255	0.39257	4.51759	23.7881	0	0
NC_006089.4	96013969	96014099	NC_006089.4.90000001-149560735.16803	0.42172	0.33363	3.64612	16.9953	0	0.00179387
NC_006089.4	96190806	96190926	NC_006089.4.90000001-149560735.17230	0.44949	0.37117	3.17275	12.2949	0	0.0236919
NC_006089.4	96241123	96241241	NC_006089.4.90000001-149560735.17397	0.42867	0.35921	3.4595	11.9298	0	0.0236919
NC_006089.4	96252409	96252672	NC_006089.4.90000001-149560735.17432	0.28363	0.2391	2.91544	15.1539	0	0.00552615
NC_006089.4	96433203	96433346	NC_006089.4.90000001-149560735.17889	0.39793	0.30985	4.53098	21.6591	0	0
NC_006089.4	96501369	96501550	NC_006089.4.90000001-149560735.18122	0.25641	0.21253	3.13329	11.3766	0	0.0373116
NC_006089.4	96586249	96586477	NC_006089.4.90000001-149560735.18418	0.40268	0.31985	3.60655	27.6009	0	0
NC_006089.4	96991203	96991307	NC_006089.4.90000001-149560735.19765	0.40937	0.32124	3.8855	13.8585	0	0.0125126
NC_006089.4	97976817	97976958	NC_006089.4.90000001-149560735.23515	0.29037	0.22906	3.88315	14.497	0	0.00873001
NC_006089.4	98017767	98017943	NC_006089.4.90000001-149560735.23637	0.34334	0.29291	2.77341	11.0559	0	0.0447492
NC_006089.4	99177507	99177678	NC_006089.4.90000001-149560735.28432	0.38987	0.31424	3.47879	18.8263	0	0
NC_006089.4	99346106	99346527	NC_006089.4.90000001-149560735.29251	0.29281	0.26297	2.17886	11.3033	0	0.038181
NC_006089.4	99696732	99696967	NC_006089.4.90000001-149560735.30565	0.3305	0.28054	2.82711	14.3913	0	0.00873001
NC_006089.4	99990056	99990178	NC_006089.4.90000001-149560735.31799	0.51839	0.42117	3.1934	15.0758	0	0.00552615
NC_006089.4	100760630	100760820	NC_006089.4.90000001-149560735.34093	0.41396	0.35509	2.60715	11.2958	0	0.0385402
NC_006089.4	101598530	101598701	NC_006089.4.90000001-149560735.37077	0.42714	0.35685	2.89036	13.6437	0	0.0127473
NC_006089.4	101994783	101994967	NC_006089.4.90000001-149560735.38018	0.30398	0.25717	2.91399	10.9442	0	0.0472945
NC_006089.4	103027693	103027799	NC_006089.4.90000001-149560735.42042	0.38997	0.30403	4.06716	15.7696	0	0.00478024
NC_006089.4	104011246	104011436	NC_006089.4.90000001-149560735.46578	0.29961	0.25076	3.00469	12.5307	0	0.0228223
NC_006089.4	104030845	104031021	NC_006089.4.90000001-149560735.46696	0.25181	0.19404	4.10241	17.5399	0	0.00179387
NC_006089.4	104300025	104300266	NC_006089.4.90000001-149560735.48404	0.28511	0.23828	3.02264	15.2524	0	0.00552615
NC_006089.4	104356299	104356400	NC_006089.4.90000001-149560735.48748	0.40225	0.32043	3.41705	11.2573	0	0.0392782
NC_006089.4	104956506	104956782	NC_006089.4.90000001-149560735.51261	0.2389	0.20004	2.97688	13.983	0	0.0104502
NC_006089.4	105062316	105062457	NC_006089.4.90000001-149560735.51813	0.13467	0.08863	6.40467	15.5937	0	0.00552615
NC_006089.4	105271813	105272283	NC_006089.4.90000001-149560735.52833	0.27864	0.24849	2.23465	13.2396	0	0.0151455
NC_006089.4	105435715	105435934	NC_006089.4.90000001-149560735.53614	0.35648	0.30369	2.80589	14.9386	0	0.00552615
NC_006089.4	105925744	105925959	NC_006089.4.90000001-149560735.54908	0.29839	0.24593	3.21805	16.3275	0	0.00179387
NC_006089.4	105976082	105976254	NC_006089.4.90000001-149560735.55053	0.54344	0.46252	2.66505	14.0636	0	0.0104502
NC_006089.4	106005762	106005930	NC_006089.4.90000001-149560735.55093	0.41474	0.35368	2.8025	12.2364	0	0.0236919
NC_006089.4	106122310	106122452	NC_006089.4.90000001-149560735.55420	0.2922	0.23249	3.65136	13.3669	0	0.0144011
NC_006089.4	106928249	106928409	NC_006089.4.90000001-149560735.58004	0.43297	0.35564	2.98447	14.2293	0	0.0104502
NC_006089.4	107019097	107019208	NC_006089.4.90000001-149560735.58457	0.42633	0.34661	3.4434	12.9106	0	0.0200656
NC_006089.4	107040199	107040371	NC_006089.4.90000001-149560735.58529	0.20762	0.16349	3.79873	12.5816	0	0.0228223
NC_006089.4	107074447	107074841	NC_006089.4.90000001-149560735.58651	0.12578	0.10502	3.02724	11.2325	0	0.0392782
NC_006089.4	109012818	109012921	NC_006089.4.90000001-149560735.66932	0.4468	0.36041	3.45785	12.0039	0	0.0236919
NC_006089.4	109048210	109048373	NC_006089.4.90000001-149560735.66983	0.53646	0.46049	2.6895	13.4306	0	0.0135875
NC_006089.4	109928582	109928721	NC_006089.4.90000001-149560735.68631	0.49751	0.42392	2.78572	12.0317	0	0.0236919
NC_006089.4	110020174	110020501	NC_006089.4.90000001-149560735.68982	0.20468	0.16683	3.48982	17.5123	0	0.00179387
NC_006089.4	110069534	110069784	NC_006089.4.90000001-149560735.69167	0.33402	0.28657	2.70352	14.0404	0	0.0104502
NC_006089.4	110436311	110436496	NC_006089.4.90000001-149560735.69908	0.34864	0.27397	3.69818	20.3045	0	0
NC_006089.4	111257569	111257708	NC_006089.4.90000001-149560735.72333	0.48425	0.39488	3.33597	17.3916	0	0.00179387
NC_006089.4	112262896	112263118	NC_006089.4.90000001-149560735.75778	0.31263	0.2699	2.64918	10.8798	0	0.0494103
NC_006089.4	112291146	112291250	NC_006089.4.90000001-149560735.75890	0.37874	0.30651	3.47114	11.2357	0	0.0392782
NC_006089.4	112558463	112558918	NC_006089.4.90000001-149560735.76853	0.26137	0.23141	2.35362	13.3816	0	0.0144011
NC_006089.4	112626431	112626610	NC_006089.4.90000001-149560735.77172	0.35764	0.3047	2.78642	11.3342	0	0.038181
NC_006089.4	112997901	112998148	NC_006089.4.90000001-149560735.78851	0.38837	0.31627	3.506	26.5592	0	0
NC_006089.4	113549284	113549424	NC_006089.4.90000001-149560735.81185	0.51954	0.44169	2.79421	12.8559	0	0.0205848
NC_006089.4	114309920	114310056	NC_006089.4.90000001-149560735.83507	0.38851	0.3128	3.50622	14.9811	0	0.00552615
NC_006089.4	114332256	114332410	NC_006089.4.90000001-149560735.83587	0.44044	0.37051	2.96088	13.6675	0	0.0127473
NC_006089.4	114551385	114551551	NC_006089.4.90000001-149560735.84449	0.26181	0.20882	3.60447	13.6635	0	0.0127473
NC_006089.4	114829431	114829663	NC_006089.4.90000001-149560735.85654	0.25189	0.20473	3.18901	14.2758	0	0.00873001
NC_006089.4	115006564	115006695	NC_006089.4.90000001-149560735.86304	0.44117	0.31646	4.1785	19.4503	0	0
NC_006089.4	115058032	115058267	NC_006089.4.90000001-149560735.86548	0.27644	0.22524	3.67986	19.7045	0	0
NC_006089.4	117581296	117581430	NC_006089.4.90000001-149560735.95784	0.47871	0.4082	2.79358	11.4809	0	0.0314832
NC_006089.4	117690586	117690880	NC_006089.4.90000001-149560735.96197	0.11985	0.09517	3.66679	11.6016	0	0.0310047
NC_006089.4	117839847	117840080	NC_006089.4.90000001-149560735.96612	0.42531	0.3753	2.35187	11.3089	0	0.038181
NC_006089.4	118256182	118256294	NC_006089.4.90000001-149560735.98288	0.28884	0.22856	3.71275	11.2187	0	0.0392782
NC_006089.4	118682411	118682528	NC_006089.4.90000001-149560735.99613	0.36961	0.2861	3.78524	14.2514	0	0.00990204
NC_006089.4	118820691	118820910	NC_006089.4.90000001-149560735.100069	0.25853	0.21653	3.03654	12.4029	0	0.0236919
NC_006089.4	119203423	119204183	NC_006089.4.90000001-149560735.101301	0.11131	0.09586	2.66496	13.8004	0	0.0127473
NC_006089.4	119210289	119210590	NC_006089.4.90000001-149560735.101332	0.24452	0.20615	2.92611	13.14	0	0.0177263
NC_006089.4	119230357	119230521	NC_006089.4.90000001-149560735.101410	0.3986	0.31999	3.36309	17.4313	0	0.00179387
NC_006089.4	119356500	119356754	NC_006089.4.90000001-149560735.101764	0.31816	0.27148	2.76354	14.5586	0	0.00873001
NC_006089.4	119376353	119377014	NC_006089.4.90000001-149560735.101793	0.13901	0.12036	2.59159	14.2944	0	0.00873001
NC_006089.4	119432292	119432575	NC_006089.4.90000001-149560735.102018	0.34673	0.30377	2.53555	12.8526	0	0.0205848
NC_006089.4	119456370	119456591	NC_006089.4.90000001-149560735.102113	0.31297	0.26658	2.79046	12.8235	0	0.0205848
NC_006089.4	119505669	119505813	NC_006089.4.90000001-149560735.102287	0.29928	0.24503	3.49709	11.9487	0	0.0236919
NC_006089.4	119555146	119555384	NC_006089.4.90000001-149560735.102397	0.25129	0.20205	3.57111	18.2483	0	0.00179387
NC_006089.4	119573518	119573870	NC_006089.4.90000001-149560735.102438	0.27998	0.24235	2.5912	15.1034	0	0.00552615
NC_006089.4	119581248	119581796	NC_006089.4.90000001-149560735.102472	0.20321	0.18007	2.32012	12.7598	0	0.0207695
NC_006089.4	119622777	119623405	NC_006089.4.90000001-149560735.102631	0.17586	0.15679	2.2434	11.678	0	0.0305082
NC_006089.4	119651518	119652333	NC_006089.4.90000001-149560735.102775	0.12667	0.10907	2.77177	18.4824	0	0
NC_006089.4	119667878	119668362	NC_006089.4.90000001-149560735.102838	0.06191	0.04384	5.26452	18.947	0	0
NC_006089.4	119669736	119670075	NC_006089.4.90000001-149560735.102850	0.2246	0.19218	2.74556	12.8544	0	0.0205848
NC_006089.4	119676612	119676713	NC_006089.4.90000001-149560735.102903	0.39191	0.30856	3.82753	14.1419	0	0.0104502
NC_006089.4	119684945	119685112	NC_006089.4.90000001-149560735.102930	0.44206	0.37514	2.83483	13.7611	0	0.0127473
NC_006089.4	119720046	119720389	NC_006089.4.90000001-149560735.103113	0.08649	0.06656	4.42213	13.3126	0	0.0151455
NC_006089.4	119742421	119742778	NC_006089.4.90000001-149560735.103241	0.26004	0.22339	2.70982	15.6936	0	0.00478024
NC_006089.4	119820625	119821394	NC_006089.4.90000001-149560735.103731	0.11262	0.09382	3.05822	20.1284	0	0
NC_006089.4	120086392	120086578	NC_006089.4.90000001-149560735.104577	0.39408	0.32576	3.12372	16.2953	0	0.00179387
NC_006089.4	120157890	120158037	NC_006089.4.90000001-149560735.104735	0.49229	0.42354	2.90994	11.261	0	0.0391705
NC_006089.4	120164271	120165140	NC_006089.4.90000001-149560735.104743	0.22313	0.19476	2.53571	27.5443	0	0
NC_006089.4	120278611	120279253	NC_006089.4.90000001-149560735.105024	0.14075	0.11886	2.93658	18.6328	0	0
NC_006089.4	120569633	120569925	NC_006089.4.90000001-149560735.105807	0.3664	0.322	2.31544	11.5794	0	0.0313782
NC_006089.4	122385215	122385445	NC_006089.4.90000001-149560735.111161	0.37186	0.32244	2.57055	12.2401	0	0.0236919
NC_006089.4	122527804	122527910	NC_006089.4.90000001-149560735.111409	0.38969	0.3168	3.49268	11.8278	0	0.0278711
NC_006089.4	122645278	122645404	NC_006089.4.90000001-149560735.111567	0.3206	0.26183	3.69416	10.9022	0	0.0477371
NC_006089.4	122776748	122776889	NC_006089.4.90000001-149560735.111947	0.44935	0.38166	2.80855	11.5591	0	0.0313782
NC_006089.4	122939225	122939534	NC_006089.4.90000001-149560735.112371	0.41023	0.36712	2.21178	12.3259	0	0.0236919
NC_006089.4	123119399	123119578	NC_006089.4.90000001-149560735.112766	0.39055	0.33445	2.71322	11.5831	0	0.0313782
NC_006089.4	123292006	123292146	NC_006089.4.90000001-149560735.113280	0.41751	0.35144	2.94838	11.794	0	0.0285898
NC_006089.4	124274384	124274558	NC_006089.4.90000001-149560735.115704	0.46351	0.40391	2.5468	10.9476	0	0.0472945
NC_006089.4	124380316	124380577	NC_006089.4.90000001-149560735.115957	0.42124	0.36404	2.62998	16.6382	0	0.00179387
NC_006089.4	124453951	124454124	NC_006089.4.90000001-149560735.116144	0.3367	0.28157	3.0268	12.6662	0	0.0207695
NC_006089.4	124454147	124454325	NC_006089.4.90000001-149560735.116146	0.32991	0.25304	4.22943	20.9652	0	0
NC_006089.4	124608946	124609061	NC_006089.4.90000001-149560735.116463	0.45619	0.37319	3.36794	13.4096	0	0.0135875
NC_006089.4	125595687	125595902	NC_006089.4.90000001-149560735.119413	0.05025	0.02785	9.17434	13.4534	0	0.0135875
NC_006089.4	125701043	125701189	NC_006089.4.90000001-149560735.119996	0.14979	0.10141	5.82973	15.932	0	0.00478024
NC_006089.4	125774878	125775002	NC_006089.4.90000001-149560735.120336	0.50968	0.42276	3.12619	14.7381	0	0.00783237
NC_006089.4	125877477	125877719	NC_006089.4.90000001-149560735.120851	0.22684	0.18701	3.21125	13.4298	0	0.0135875
NC_006089.4	126222976	126223118	NC_006089.4.90000001-149560735.122478	0.42377	0.34499	3.42741	16.772	0	0.00179387
NC_006089.4	130735266	130735394	NC_006089.4.90000001-149560735.139746	0.34905	0.2757	3.76526	15.3391	0	0.00552615
NC_006089.4	130794317	130794567	NC_006089.4.90000001-149560735.140021	0.24042	0.20151	3.20129	13.9454	0	0.0115681
NC_006089.4	130827645	130827996	NC_006089.4.90000001-149560735.140164	0.22377	0.19506	2.50707	11.2388	0	0.0392782
NC_006089.4	130961267	130961445	NC_006089.4.90000001-149560735.140689	0.41264	0.35736	2.57646	10.8597	0	0.0498067
NC_006089.4	131735457	131735588	NC_006089.4.90000001-149560735.143325	0.39039	0.32527	3.12241	11.4916	0	0.0314832
NC_006089.4	131811828	131812008	NC_006089.4.90000001-149560735.143560	0.30524	0.24846	3.29396	14.207	0	0.0104502
NC_006089.4	131860421	131860610	NC_006089.4.90000001-149560735.143699	0.28831	0.24439	3.01831	10.8957	0	0.0482527
NC_006089.4	132455560	132455720	NC_006089.4.90000001-149560735.145572	0.36212	0.30343	2.84878	11.0404	0	0.0451944
NC_006089.4	134557973	134558083	NC_006089.4.90000001-149560735.148535	0.41875	0.3374	3.64608	13.5208	0	0.0127473
NC_006089.4	134893431	134893619	NC_006089.4.90000001-149560735.149211	0.41044	0.3537	2.59311	11.4844	0	0.0314832
NC_006089.4	135131216	135131420	NC_006089.4.90000001-149560735.150653	0.29586	0.24926	2.91038	11.899	0	0.0243989
NC_006089.4	135435760	135435956	NC_006089.4.90000001-149560735.152191	0.44462	0.38396	2.56826	12.2065	0	0.0236919
NC_006089.4	135946819	135946925	NC_006089.4.90000001-149560735.154554	0.42079	0.33203	3.82521	15.1678	0	0.00552615
NC_006089.4	135949490	135949596	NC_006089.4.90000001-149560735.154579	0.42079	0.33203	3.82521	15.1678	0	0.00552615
NC_006089.4	136268718	136269006	NC_006089.4.90000001-149560735.156559	0.3806	0.33927	2.38359	11.9629	0	0.0236919
NC_006089.4	139277516	139277664	NC_006089.4.90000001-149560735.169185	0.44335	0.37825	2.79602	11.8542	0	0.0265878
NC_006089.4	139590578	139590787	NC_006089.4.90000001-149560735.170624	0.39446	0.33842	2.59429	12.0651	0	0.0236919
NC_006089.4	140178384	140178616	NC_006089.4.90000001-149560735.173516	0.20205	0.16658	3.1977	11.7288	0	0.0302473
NC_006089.4	140215168	140215584	NC_006089.4.90000001-149560735.173674	0.32352	0.29176	2.10692	11.2466	0	0.0392782
NC_006089.4	140429728	140429838	NC_006089.4.90000001-149560735.174422	0.43539	0.35069	3.65441	14.412	0	0.00873001
NC_006089.4	140566387	140566564	NC_006089.4.90000001-149560735.174999	0.43424	0.34615	3.43559	21.8006	0	0
NC_006089.4	140873446	140873564	NC_006089.4.90000001-149560735.176067	0.32828	0.21585	6.56213	32.4615	0	0
NC_006089.4	141846447	141846771	NC_006089.4.90000001-149560735.179175	0.25029	0.21315	2.77975	14.6918	0	0.00783237
NC_006089.4	142139546	142139706	NC_006089.4.90000001-149560735.180355	0.30255	0.24567	3.39487	13.984	0	0.0104502
NC_006089.4	142972535	142973018	NC_006089.4.90000001-149560735.182753	0.26696	0.23523	2.39299	15.6238	0	0.00552615
NC_006089.4	143297217	143297472	NC_006089.4.90000001-149560735.183844	0.31845	0.27446	2.64755	12.9521	0	0.0200656
NC_006089.4	143432781	143432906	NC_006089.4.90000001-149560735.184279	0.33333	0.26168	3.83194	14.5055	0	0.00873001
NC_006089.4	143977393	143977539	NC_006089.4.90000001-149560735.185394	0.52141	0.44377	2.75592	12.4255	0	0.0234278
NC_006089.4	144238237	144238437	NC_006089.4.90000001-149560735.185935	0.32438	0.26797	3.18965	15.2794	0	0.00552615
NC_006089.4	144487941	144488087	NC_006089.4.90000001-149560735.186651	0.35171	0.29291	3.06742	11.725	0	0.0302473
NC_006089.4	144976916	144977019	NC_006089.4.90000001-149560735.188339	0.3622	0.26643	4.92921	19.8361	0	0
NC_006089.4	145298429	145298562	NC_006089.4.90000001-149560735.189873	0.37935	0.3039	3.44192	14.0788	0	0.0104502
NC_006089.4	146085513	146085642	NC_006089.4.90000001-149560735.192270	0.33469	0.26732	3.77548	14.0543	0	0.0104502
NC_006089.4	146289473	146289669	NC_006089.4.90000001-149560735.193186	0.2606	0.21092	3.42898	15.0585	0	0.00552615
NC_006089.4	146895617	146895812	NC_006089.4.90000001-149560735.195191	0.35563	0.30619	2.66697	10.9762	0	0.0452869
NC_006089.4	147146245	147146495	NC_006089.4.90000001-149560735.195915	0.23315	0.19152	3.72902	17.1904	0	0.00179387
NC_006089.4	147267736	147268064	NC_006089.4.90000001-149560735.196352	0.21736	0.18892	2.83897	11.7822	0	0.0292977
NC_006089.4	147430365	147430498	NC_006089.4.90000001-149560735.196939	0.45254	0.3781	3.0359	12.9866	0	0.0200656
NC_006089.4	147714227	147714405	NC_006089.4.90000001-149560735.197998	0.26999	0.22161	3.25343	12.8009	0	0.0207695
NC_006089.4	147862453	147862651	NC_006089.4.90000001-149560735.198611	0.25108	0.20892	3.07196	11.0382	0	0.0451944
NC_006090.4	1149850	1150117	NC_006090.4.1-90000000.4446	0.28771	0.23971	3.07891	16.9887	0	0.00179387
NC_006090.4	1472457	1472607	NC_006090.4.1-90000000.6242	0.44071	0.3731	2.86363	12.7774	0	0.0207695
NC_006090.4	1539311	1539418	NC_006090.4.1-90000000.6635	0.48605	0.39595	3.59339	14.2098	0	0.0104502
NC_006090.4	1562051	1562162	NC_006090.4.1-90000000.6793	0.41265	0.33886	3.23106	11.3992	0	0.0354766
NC_006090.4	1576927	1577090	NC_006090.4.1-90000000.6878	0.44063	0.37816	2.65072	11.0411	0	0.0451944
NC_006090.4	1580372	1580734	NC_006090.4.1-90000000.6893	0.21614	0.1886	2.49453	10.8626	0	0.0498067
NC_006090.4	1719029	1719505	NC_006090.4.1-90000000.7688	0.25452	0.21963	2.62472	19.2286	0	0
NC_006090.4	3807772	3807874	NC_006090.4.1-90000000.15267	0.56503	0.49898	9.60198	14.2177	0	0.0104502
NC_006090.4	4047005	4047118	NC_006090.4.1-90000000.16015	0.2553	0.18952	4.54574	13.9705	0	0.0104502
NC_006090.4	4642125	4642267	NC_006090.4.1-90000000.18319	0.26906	0.21781	3.4295	10.8854	0	0.0494103
NC_006090.4	5205849	5205996	NC_006090.4.1-90000000.21028	0.40922	0.33623	3.31308	15.2462	0	0.00552615
NC_006090.4	5833647	5833906	NC_006090.4.1-90000000.23544	0.34324	0.29379	2.49228	11.6247	0	0.0305082
NC_006090.4	7301668	7301990	NC_006090.4.1-90000000.27935	0.41124	0.36548	2.26838	13.6105	0	0.0127473
NC_006090.4	12654634	12654744	NC_006090.4.1-90000000.48825	0.44214	0.34339	3.62352	13.8551	0	0.0125126
NC_006090.4	14949436	14949573	NC_006090.4.1-90000000.58990	0.42601	0.34964	3.22653	12.9798	0	0.0200656
NC_006090.4	15214799	15215217	NC_006090.4.1-90000000.60629	0.19713	0.16735	2.82529	15.6291	0	0.00552615
NC_006090.4	17080200	17080370	NC_006090.4.1-90000000.66862	0.2751	0.21015	4.25419	19.9623	0	0
NC_006090.4	19080712	19080948	NC_006090.4.1-90000000.75462	0.4208	0.36201	2.67715	16.2457	0	0.00344405
NC_006090.4	19093618	19093751	NC_006090.4.1-90000000.75552	0.3866	0.32126	3.10517	11.5589	0	0.0313782
NC_006090.4	19106140	19106250	NC_006090.4.1-90000000.75623	0.30798	0.24364	3.73998	11.2617	0	0.0391705
NC_006090.4	19161600	19161869	NC_006090.4.1-90000000.75826	0.27747	0.23769	2.7082	12.5201	0	0.0228223
NC_006090.4	19264462	19264621	NC_006090.4.1-90000000.76364	0.27595	0.2276	3.29802	11.4398	0	0.0314832
NC_006090.4	19388753	19389030	NC_006090.4.1-90000000.77084	0.25272	0.20116	3.65372	22.5208	0	0
NC_006090.4	19459017	19459139	NC_006090.4.1-90000000.77455	0.32255	0.25601	3.69093	13.0816	0	0.0186716
NC_006090.4	19535639	19535758	NC_006090.4.1-90000000.77761	0.42491	0.3236	4.37661	21.1429	0	0
NC_006090.4	19536830	19536947	NC_006090.4.1-90000000.77769	0.46717	0.38246	3.56162	14.9625	0	0.00552615
NC_006090.4	19580512	19581037	NC_006090.4.1-90000000.77963	0.14089	0.11665	3.14888	18.2377	0	0.00179387
NC_006090.4	19596535	19596676	NC_006090.4.1-90000000.78023	0.47439	0.37013	4.00847	23.9499	0	0
NC_006090.4	19622621	19622864	NC_006090.4.1-90000000.78137	0.24254	0.20219	3.09388	13.5047	0	0.0127473
NC_006090.4	19654582	19655265	NC_006090.4.1-90000000.78251	0.08962	0.07358	3.24509	16.135	0	0.00344405
NC_006090.4	19728217	19728372	NC_006090.4.1-90000000.78530	0.39318	0.28703	4.44231	26.707	0	0
NC_006090.4	19769668	19769825	NC_006090.4.1-90000000.78651	0.47971	0.41248	2.63399	11.2444	0	0.0392782
NC_006090.4	19890599	19890838	NC_006090.4.1-90000000.79037	0.29679	0.25254	2.79508	12.8565	0	0.0205848
NC_006090.4	19900200	19900499	NC_006090.4.1-90000000.79075	0.22053	0.18509	3.02811	14.2453	0	0.00990204
NC_006090.4	20101220	20101857	NC_006090.4.1-90000000.80233	0.11415	0.098	2.6939	12.4502	0	0.0234278
NC_006090.4	20105017	20105285	NC_006090.4.1-90000000.80254	0.25738	0.22164	2.65562	11.2211	0	0.0392782
NC_006090.4	20106671	20106890	NC_006090.4.1-90000000.80258	0.14431	0.10476	4.97252	17.3443	0	0.00179387
NC_006090.4	20123095	20123995	NC_006090.4.1-90000000.80345	0.08962	0.07864	2.51407	11.1526	0	0.0413656
NC_006090.4	20137300	20137476	NC_006090.4.1-90000000.80426	0.12089	0.08737	4.98498	12.0196	0	0.0236919
NC_006090.4	20225071	20225369	NC_006090.4.1-90000000.80931	0.22559	0.19383	2.67808	11.0825	0	0.0430282
NC_006090.4	20268347	20269004	NC_006090.4.1-90000000.81134	0.17908	0.15902	2.48869	14.5955	0	0.00783237
NC_006090.4	20321520	20321676	NC_006090.4.1-90000000.81377	0.22582	0.17907	3.66709	11.4659	0	0.0314832
NC_006090.4	20349297	20350145	NC_006090.4.1-90000000.81550	0.0843	0.06462	4.15825	30.1718	0	0
NC_006090.4	20356480	20356584	NC_006090.4.1-90000000.81591	0.28412	0.20047	5.38148	17.0739	0	0.00179387
NC_006090.4	20365071	20365757	NC_006090.4.1-90000000.81626	0.11971	0.09678	3.4377	24.2338	0	0
NC_006090.4	20367017	20367408	NC_006090.4.1-90000000.81632	0.28065	0.24577	2.44283	14.3156	0	0.00873001
NC_006090.4	20464037	20464273	NC_006090.4.1-90000000.82004	0.23343	0.18666	3.58079	16.8193	0	0.00179387
NC_006090.4	20545511	20546127	NC_006090.4.1-90000000.82290	0.09156	0.07097	4.1841	23.2696	0	0
NC_006090.4	20628044	20628524	NC_006090.4.1-90000000.82612	0.11001	0.08896	3.4971	15.5083	0	0.00552615
NC_006090.4	20635897	20636216	NC_006090.4.1-90000000.82662	0.24494	0.21361	2.50874	10.9791	0	0.0452869
NC_006090.4	20645849	20646229	NC_006090.4.1-90000000.82706	0.12403	0.0968	4.16705	18.1359	0	0.00179387
NC_006090.4	20649367	20649639	NC_006090.4.1-90000000.82719	0.33183	0.27431	3.18362	21.6116	0	0
NC_006090.4	20655586	20656133	NC_006090.4.1-90000000.82756	0.13386	0.1108	3.15776	17.9283	0	0.00179387
NC_006090.4	20656289	20656489	NC_006090.4.1-90000000.82760	0.26613	0.21558	3.46195	15.2918	0	0.00552615
NC_006090.4	20694635	20695007	NC_006090.4.1-90000000.82947	0.114	0.09183	3.49369	12.76	0	0.0207695
NC_006090.4	20752310	20752508	NC_006090.4.1-90000000.83252	0.24613	0.19345	4.20345	18.8835	0	0
NC_006090.4	20835394	20835819	NC_006090.4.1-90000000.83522	0.32851	0.27841	2.892	27.1896	0	0
NC_006090.4	21138080	21138194	NC_006090.4.1-90000000.84705	0.36148	0.27731	4.29799	16.6296	0	0.00179387
NC_006090.4	21152849	21152990	NC_006090.4.1-90000000.84776	0.34694	0.28864	3.1118	11.2555	0	0.0392782
NC_006090.4	21259507	21259642	NC_006090.4.1-90000000.85399	0.50314	0.42578	3.08905	14.004	0	0.0104502
NC_006090.4	21289310	21289552	NC_006090.4.1-90000000.85624	0.26405	0.20826	3.83337	22.7913	0	0
NC_006090.4	21314918	21315539	NC_006090.4.1-90000000.85791	0.07728	0.06204	3.52354	15.2023	0	0.00552615
NC_006090.4	21344233	21345007	NC_006090.4.1-90000000.86003	0.15213	0.13266	2.50915	16.7856	0	0.00179387
NC_006090.4	21389836	21390220	NC_006090.4.1-90000000.86276	0.19197	0.16161	2.93188	15.6583	0	0.00478024
NC_006090.4	21407648	21407753	NC_006090.4.1-90000000.86398	0.37848	0.29945	3.85765	13.5509	0	0.0127473
NC_006090.4	21433828	21434593	NC_006090.4.1-90000000.86525	0.2082	0.18868	2.05676	12.6249	0	0.0215888
NC_006090.4	21465911	21466068	NC_006090.4.1-90000000.86696	0.37562	0.31565	2.9617	11.8924	0	0.0243989
NC_006090.4	21466919	21467302	NC_006090.4.1-90000000.86702	0.17874	0.15382	2.70546	11.3287	0	0.038181
NC_006090.4	21522988	21523365	NC_006090.4.1-90000000.87055	0.2263	0.18828	3.0711	19.7051	0	0
NC_006090.4	21569963	21570275	NC_006090.4.1-90000000.87309	0.31357	0.25766	3.46265	25.7757	0	0
NC_006090.4	21666614	21666768	NC_006090.4.1-90000000.87830	0.14422	0.10941	4.93348	10.8805	0	0.0494103
NC_006090.4	22203196	22203299	NC_006090.4.1-90000000.90125	0.55907	0.41577	3.70049	15.6979	0	0.00478024
NC_006090.4	22736988	22737152	NC_006090.4.1-90000000.92460	0.47917	0.3951	3.21227	18.5822	0	0
NC_006090.4	23308526	23308993	NC_006090.4.1-90000000.95052	0.12261	0.10385	2.87514	11.4526	0	0.0314832
NC_006090.4	23446668	23446808	NC_006090.4.1-90000000.95826	0.41143	0.33443	3.38812	15.6302	0	0.00552615
NC_006090.4	24062623	24062771	NC_006090.4.1-90000000.98157	0.37598	0.31095	3.26372	12.8636	0	0.0205848
NC_006090.4	24218623	24218740	NC_006090.4.1-90000000.98606	0.37505	0.30177	3.79859	12.186	0	0.0236919
NC_006090.4	24233950	24234180	NC_006090.4.1-90000000.98652	0.36557	0.31308	2.66928	13.3587	0	0.0144011
NC_006090.4	24322146	24322362	NC_006090.4.1-90000000.98866	0.262	0.21519	3.23371	14.335	0	0.00873001
NC_006090.4	24330841	24331190	NC_006090.4.1-90000000.98889	0.24481	0.2109	2.65444	13.9528	0	0.0104502
NC_006090.4	24374153	24374269	NC_006090.4.1-90000000.99054	0.3297	0.24771	4.19631	14.3301	0	0.00873001
NC_006090.4	24404656	24404917	NC_006090.4.1-90000000.99158	0.38235	0.32405	2.82066	18.6369	0	0
NC_006090.4	24438607	24438911	NC_006090.4.1-90000000.99325	0.20971	0.17758	2.84958	12.2644	0	0.0236919
NC_006090.4	24442139	24442348	NC_006090.4.1-90000000.99343	0.36005	0.31064	2.63481	11.9678	0	0.0236919
NC_006090.4	24449832	24450128	NC_006090.4.1-90000000.99378	0.27379	0.23705	2.7106	13.0018	0	0.0200656
NC_006090.4	24481041	24481258	NC_006090.4.1-90000000.99533	0.18419	0.14634	3.6805	13.0982	0	0.0177263
NC_006090.4	24522390	24522742	NC_006090.4.1-90000000.99773	0.22662	0.18985	3.00215	17.6604	0	0.00179387
NC_006090.4	24536157	24536430	NC_006090.4.1-90000000.99840	0.27095	0.22618	3.0635	16.8093	0	0.00179387
NC_006090.4	24536461	24536758	NC_006090.4.1-90000000.99841	0.18529	0.14949	3.48239	16.7676	0	0.00179387
NC_006090.4	24550072	24550577	NC_006090.4.1-90000000.99901	0.25402	0.21911	2.64042	20.4288	0	0
NC_006090.4	24576739	24576857	NC_006090.4.1-90000000.100045	0.34887	0.28162	3.45885	12.5062	0	0.0228223
NC_006090.4	24646074	24646223	NC_006090.4.1-90000000.100319	0.21864	0.17292	3.7505	11.4057	0	0.0354766
NC_006090.4	24651993	24652119	NC_006090.4.1-90000000.100359	0.27083	0.20939	4.30506	14.5809	0	0.00783237
NC_006090.4	24653461	24653649	NC_006090.4.1-90000000.100366	0.21241	0.13939	6.48917	32.9784	0	0
NC_006090.4	24653677	24653930	NC_006090.4.1-90000000.100368	0.28669	0.23845	3.07882	15.9242	0	0.00478024
NC_006090.4	24659374	24659576	NC_006090.4.1-90000000.100402	0.35361	0.29584	3.02808	15.1992	0	0.00552615
NC_006090.4	24685405	24685790	NC_006090.4.1-90000000.100528	0.16241	0.13086	3.50746	19.2286	0	0
NC_006090.4	24687136	24687270	NC_006090.4.1-90000000.100536	0.4363	0.37238	2.97662	11.0379	0	0.0451944
NC_006090.4	24693164	24693455	NC_006090.4.1-90000000.100570	0.24148	0.16132	6.40999	55.2668	0	0
NC_006090.4	24700184	24700451	NC_006090.4.1-90000000.100606	0.26131	0.21645	3.1545	17.0451	0	0.00179387
NC_006090.4	24708731	24708982	NC_006090.4.1-90000000.100658	0.25188	0.18363	4.58863	29.7135	0	0
NC_006090.4	24727752	24727877	NC_006090.4.1-90000000.100784	0.43752	0.35557	3.38966	14.7702	0	0.00783237
NC_006090.4	24749769	24750400	NC_006090.4.1-90000000.100909	0.13392	0.09943	4.58561	42.5197	0	0
NC_006090.4	24765429	24765631	NC_006090.4.1-90000000.100988	0.33528	0.27868	3.11675	15.5374	0	0.00552615
NC_006090.4	24807352	24807465	NC_006090.4.1-90000000.101182	0.43187	0.35237	3.39169	13.1062	0	0.0177263
NC_006090.4	24858804	24859056	NC_006090.4.1-90000000.101374	0.26226	0.21629	3.20709	15.8312	0	0.00478024
NC_006090.4	24865037	24865275	NC_006090.4.1-90000000.101401	0.4051	0.33797	3.061	19.65	0	0
NC_006090.4	24899895	24900242	NC_006090.4.1-90000000.101571	0.22165	0.19241	2.56103	11.683	0	0.0305082
NC_006090.4	24996611	24996739	NC_006090.4.1-90000000.102136	0.18385	0.13665	4.56905	11.6474	0	0.0305082
NC_006090.4	25013917	25014298	NC_006090.4.1-90000000.102235	0.25065	0.18453	4.99909	50.9433	0	0
NC_006090.4	25023332	25023504	NC_006090.4.1-90000000.102268	0.34897	0.28694	3.41268	15.537	0	0.00552615
NC_006090.4	25130280	25130385	NC_006090.4.1-90000000.102683	0.39434	0.32632	3.60533	11.0791	0	0.0430282
NC_006090.4	25151074	25151216	NC_006090.4.1-90000000.102758	0.3852	0.27772	5.18955	31.7623	0	0
NC_006090.4	25169294	25169431	NC_006090.4.1-90000000.102819	0.33112	0.26874	3.98572	14.7344	0	0.00783237
NC_006090.4	25184209	25184325	NC_006090.4.1-90000000.102884	0.3682	0.28202	5.51788	22.0628	0	0
NC_006090.4	25186060	25186197	NC_006090.4.1-90000000.102898	0.31261	0.24584	4.52817	16.9089	0	0.00179387
NC_006090.4	25815233	25815857	NC_006090.4.1-90000000.105426	0.04415	0.034	4.06107	11.4193	0	0.0335011
NC_006090.4	25820687	25820955	NC_006090.4.1-90000000.105460	0.24476	0.20792	2.75136	11.5229	0	0.0314832
NC_006090.4	25902208	25902420	NC_006090.4.1-90000000.105817	0.11691	0.08605	4.47014	11.2849	0	0.0385402
NC_006090.4	26019126	26019251	NC_006090.4.1-90000000.106343	0.43143	0.35787	3.13575	12.5131	0	0.0228223
NC_006090.4	26035902	26036127	NC_006090.4.1-90000000.106418	0.2053	0.16321	3.72011	15.2673	0	0.00552615
NC_006090.4	26338056	26338305	NC_006090.4.1-90000000.107791	0.25486	0.21754	2.76555	11.0384	0	0.0451944
NC_006090.4	26702608	26702947	NC_006090.4.1-90000000.109263	0.16617	0.14	2.92674	11.0289	0	0.0452869
NC_006090.4	26872261	26872454	NC_006090.4.1-90000000.109922	0.45199	0.39624	2.49466	11.3744	0	0.0373116
NC_006090.4	27470043	27470211	NC_006090.4.1-90000000.112778	0.43755	0.37442	2.77447	12.6946	0	0.0207695
NC_006090.4	27949355	27949678	NC_006090.4.1-90000000.115226	0.36284	0.31911	3.04287	19.2115	0	0
NC_006090.4	28051170	28051389	NC_006090.4.1-90000000.115621	0.25914	0.21824	2.86404	11.1043	0	0.0425072
NC_006090.4	28069610	28069782	NC_006090.4.1-90000000.115690	0.34306	0.28873	2.96144	11.9122	0	0.0236919
NC_006090.4	28228389	28228511	NC_006090.4.1-90000000.116247	0.24844	0.18042	4.89663	16.3281	0	0.00179387
NC_006090.4	28401030	28401229	NC_006090.4.1-90000000.116792	0.35498	0.30137	2.91741	14.0755	0	0.0104502
NC_006090.4	28409229	28409484	NC_006090.4.1-90000000.116823	0.33207	0.28862	2.53396	12.2461	0	0.0236919
NC_006090.4	28410400	28410752	NC_006090.4.1-90000000.116831	0.24419	0.21166	2.60118	13.2055	0	0.0151455
NC_006090.4	28487225	28487464	NC_006090.4.1-90000000.117124	0.28851	0.24846	2.6501	11.166	0	0.0413656
NC_006090.4	28488955	28489080	NC_006090.4.1-90000000.117134	0.45202	0.36682	3.43475	15.042	0	0.00552615
NC_006090.4	28566737	28566981	NC_006090.4.1-90000000.117355	0.33809	0.27051	3.6757	26.1563	0	0
NC_006090.4	28583555	28583655	NC_006090.4.1-90000000.117390	0.57383	0.45965	3.67387	17.7682	0	0.00179387
NC_006090.4	28842727	28842861	NC_006090.4.1-90000000.118268	0.5007	0.41072	3.31459	17.3047	0	0.00179387
NC_006090.4	28862385	28862530	NC_006090.4.1-90000000.118387	0.38686	0.32281	3.1668	13.2583	0	0.0151455
NC_006090.4	28881137	28881529	NC_006090.4.1-90000000.118483	0.20986	0.18095	2.64216	13.5545	0	0.0127473
NC_006090.4	28905574	28905833	NC_006090.4.1-90000000.118590	0.2094	0.17322	3.16079	13.6712	0	0.0127473
NC_006090.4	28905917	28906095	NC_006090.4.1-90000000.118591	0.27013	0.21406	3.7268	17.1976	0	0.00179387
NC_006090.4	28944400	28944558	NC_006090.4.1-90000000.118749	0.42413	0.35967	2.83566	12.4317	0	0.0234278
NC_006090.4	28967399	28967526	NC_006090.4.1-90000000.118855	0.47741	0.40286	2.9323	12.3857	0	0.0236919
NC_006090.4	29960363	29960663	NC_006090.4.1-90000000.122507	0.21805	0.18323	2.95782	13.9851	0	0.0104502
NC_006090.4	30112217	30112609	NC_006090.4.1-90000000.123393	0.29239	0.26264	2.16203	10.924	0	0.0472945
NC_006090.4	30524303	30524476	NC_006090.4.1-90000000.126024	0.34355	0.2884	2.94705	11.7808	0	0.0298628
NC_006090.4	30530723	30531064	NC_006090.4.1-90000000.126080	0.29778	0.26013	2.49393	14.1052	0	0.0104502
NC_006090.4	30567441	30567835	NC_006090.4.1-90000000.126356	0.15816	0.13238	3.00693	14.0461	0	0.0104502
NC_006090.4	30927456	30927782	NC_006090.4.1-90000000.129059	0.42402	0.3735	2.33363	15.8141	0	0.00478024
NC_006090.4	31475732	31475852	NC_006090.4.1-90000000.131859	0.4754	0.40418	2.9557	10.8691	0	0.0498067
NC_006090.4	31811042	31811339	NC_006090.4.1-90000000.132807	0.36489	0.31633	2.58478	16.1662	0	0.00344405
NC_006090.4	32854001	32854211	NC_006090.4.1-90000000.136630	0.37606	0.32901	2.47878	10.9555	0	0.0470101
NC_006090.4	33205336	33205539	NC_006090.4.1-90000000.137496	0.52089	0.45245	2.57866	14.312	0	0.00873001
NC_006090.4	33308648	33308776	NC_006090.4.1-90000000.137801	0.39911	0.30964	4.66031	21.7239	0	0
NC_006090.4	33737419	33737563	NC_006090.4.1-90000000.139156	0.20484	0.15732	4.10038	12.032	0	0.0236919
NC_006090.4	34452757	34453169	NC_006090.4.1-90000000.141490	0.22995	0.20383	2.35277	10.9657	0	0.0458702
NC_006090.4	34530790	34530937	NC_006090.4.1-90000000.141882	0.54217	0.41853	4.12815	30.7171	0	0
NC_006090.4	34707030	34707252	NC_006090.4.1-90000000.142545	0.2962	0.25169	4.73955	20.0577	0	0
NC_006090.4	34717874	34717996	NC_006090.4.1-90000000.142588	0.26974	0.20319	4.46461	15.0474	0	0.00552615
NC_006090.4	34953674	34954069	NC_006090.4.1-90000000.143508	0.19926	0.17333	2.5293	11.7026	0	0.0302473
NC_006090.4	35977151	35977439	NC_006090.4.1-90000000.146789	0.41375	0.34994	2.88418	22.8091	0	0
NC_006090.4	36391267	36391503	NC_006090.4.1-90000000.148087	0.40692	0.34598	3.27317	18.9137	0	0
NC_006090.4	36770111	36770216	NC_006090.4.1-90000000.149113	0.44429	0.36701	3.5335	11.6661	0	0.0305082
NC_006090.4	40153611	40153875	NC_006090.4.1-90000000.161324	0.27901	0.23816	2.78138	13.1156	0	0.0177263
NC_006090.4	40291169	40291372	NC_006090.4.1-90000000.161945	0.43132	0.37047	2.68118	13.5832	0	0.0127473
NC_006090.4	43856657	43856791	NC_006090.4.1-90000000.174948	0.34938	0.28145	3.49987	13.9533	0	0.0104502
NC_006090.4	44314136	44314261	NC_006090.4.1-90000000.177009	0.49587	0.41027	3.05055	11.1425	0	0.0413656
NC_006090.4	44329489	44329720	NC_006090.4.1-90000000.177034	0.34722	0.29809	2.66575	12.7538	0	0.0207695
NC_006090.4	44412715	44412939	NC_006090.4.1-90000000.177270	0.25204	0.19643	4.03653	21.6124	0	0
NC_006090.4	44560872	44561229	NC_006090.4.1-90000000.177763	0.20547	0.16759	3.3691	20.4347	0	0
NC_006090.4	44874957	44875242	NC_006090.4.1-90000000.178583	0.33057	0.28763	2.64235	14.1433	0	0.0104502
NC_006090.4	44912783	44913008	NC_006090.4.1-90000000.178697	0.37163	0.32507	2.48292	11.0014	0	0.0452869
NC_006090.4	45041352	45041536	NC_006090.4.1-90000000.179065	0.32651	0.2779	2.85632	11.3005	0	0.038181
NC_006090.4	46901765	46901889	NC_006090.4.1-90000000.184866	0.30797	0.24327	3.88468	13.9957	0	0.0104502
NC_006090.4	47143455	47143673	NC_006090.4.1-90000000.185715	0.29403	0.2384	3.45638	17.9092	0	0.00179387
NC_006090.4	48125689	48125946	NC_006090.4.1-90000000.189375	0.26478	0.21379	3.71901	21.353	0	0
NC_006090.4	48221124	48221503	NC_006090.4.1-90000000.189698	0.21091	0.17404	3.1811	19.6583	0	0
NC_006090.4	48881591	48881751	NC_006090.4.1-90000000.192155	0.40164	0.3398	2.93781	12.6938	0	0.0207695
NC_006090.4	49670585	49670883	NC_006090.4.1-90000000.194602	0.2462	0.20855	2.85269	13.9802	0	0.0104502
NC_006090.4	49672481	49672617	NC_006090.4.1-90000000.194604	0.37368	0.30961	3.13009	11.7015	0	0.0302473
NC_006090.4	50778677	50778966	NC_006090.4.1-90000000.197966	0.34718	0.30789	2.30598	10.9185	0	0.0472945
NC_006090.4	50859121	50859766	NC_006090.4.1-90000000.198325	0.26061	0.22802	2.47986	22.5493	0	0
NC_006090.4	50862517	50862665	NC_006090.4.1-90000000.198339	0.25301	0.19329	4.22746	15.8531	0	0.00478024
NC_006090.4	51016647	51016789	NC_006090.4.1-90000000.199129	0.35778	0.29829	3.03996	11.2202	0	0.0392782
NC_006090.4	51080983	51081102	NC_006090.4.1-90000000.199519	0.32525	0.25302	3.99259	14.8525	0	0.00679681
NC_006090.4	51112964	51113227	NC_006090.4.1-90000000.199677	0.20479	0.16907	3.16422	12.7373	0	0.0207695
NC_006090.4	51120067	51120243	NC_006090.4.1-90000000.199716	0.27055	0.22488	3.09783	11.1921	0	0.0404367
NC_006090.4	51322827	51322939	NC_006090.4.1-90000000.201096	0.38315	0.31489	3.41737	11.5612	0	0.0313782
NC_006090.4	51613663	51613926	NC_006090.4.1-90000000.202802	0.28822	0.24998	2.60739	11.7831	0	0.0292977
NC_006090.4	51819862	51820051	NC_006090.4.1-90000000.203560	0.38954	0.31854	3.63129	20.205	0	0
NC_006090.4	53888875	53889116	NC_006090.4.1-90000000.211464	0.42916	0.36687	2.8376	18.2698	0	0.00179387
NC_006090.4	54027976	54028152	NC_006090.4.1-90000000.212152	0.42921	0.366	2.7407	12.688	0	0.0207695
NC_006090.4	54063356	54063578	NC_006090.4.1-90000000.212386	0.45139	0.39126	2.55224	14.2778	0	0.00873001
NC_006090.4	54067890	54068153	NC_006090.4.1-90000000.212415	0.24316	0.2052	2.89969	12.9113	0	0.0200656
NC_006090.4	54431116	54431270	NC_006090.4.1-90000000.214122	0.42631	0.35687	2.96576	13.6303	0	0.0127473
NC_006090.4	54817971	54818278	NC_006090.4.1-90000000.215816	0.31487	0.27541	2.45182	12.8085	0	0.0205848
NC_006090.4	56416026	56416207	NC_006090.4.1-90000000.221923	0.45178	0.38856	2.66925	13.0468	0	0.0195239
NC_006090.4	59142988	59143310	NC_006090.4.1-90000000.231186	0.40825	0.36419	2.18676	11.9306	0	0.0236919
NC_006090.4	59506564	59506689	NC_006090.4.1-90000000.232602	0.41104	0.33515	3.32978	13.9978	0	0.0104502
NC_006090.4	59561141	59561254	NC_006090.4.1-90000000.232822	0.38159	0.26438	5.72578	27.656	0	0
NC_006090.4	59643927	59644113	NC_006090.4.1-90000000.233190	0.41946	0.36476	2.56513	11.0859	0	0.0430282
NC_006090.4	59654453	59654674	NC_006090.4.1-90000000.233233	0.33283	0.26069	3.8656	26.5732	0	0
NC_006090.4	59655055	59655176	NC_006090.4.1-90000000.233239	0.41008	0.32787	3.62226	15.5295	0	0.00552615
NC_006090.4	59858132	59858325	NC_006090.4.1-90000000.234141	0.4625	0.39185	2.72483	14.0056	0	0.0104502
NC_006090.4	60204600	60204822	NC_006090.4.1-90000000.235529	0.28832	0.2392	3.14086	15.3594	0	0.00552615
NC_006090.4	60630159	60630380	NC_006090.4.1-90000000.236689	0.37702	0.32241	2.81446	14.377	0	0.00873001
NC_006090.4	60714275	60714392	NC_006090.4.1-90000000.236970	0.37148	0.29574	3.7076	13.6307	0	0.0127473
NC_006090.4	60823288	60823408	NC_006090.4.1-90000000.237339	0.40898	0.32921	3.45803	13.7656	0	0.0127473
NC_006090.4	60949875	60950175	NC_006090.4.1-90000000.237847	0.35191	0.30778	2.46225	13.0998	0	0.0177263
NC_006090.4	60954324	60954490	NC_006090.4.1-90000000.237861	0.26969	0.20961	3.96617	16.8704	0	0.00179387
NC_006090.4	61049520	61049681	NC_006090.4.1-90000000.238162	0.37142	0.30799	3.10631	13.8562	0	0.0125126
NC_006090.4	61057082	61057195	NC_006090.4.1-90000000.238184	0.44157	0.32578	4.85605	24.6573	0	0
NC_006090.4	61118994	61119202	NC_006090.4.1-90000000.238385	0.40482	0.3455	2.6441	12.7503	0	0.0207695
NC_006090.4	61363270	61363478	NC_006090.4.1-90000000.239212	0.37943	0.32755	2.67546	12.5966	0	0.0223803
NC_006090.4	61695161	61695336	NC_006090.4.1-90000000.240385	0.29939	0.24821	3.17311	12.804	0	0.0207695
NC_006090.4	61893911	61894152	NC_006090.4.1-90000000.241289	0.31025	0.26345	2.84246	14.5796	0	0.00783237
NC_006090.4	62431003	62431225	NC_006090.4.1-90000000.242781	0.34032	0.29633	2.53549	10.8913	0	0.0482527
NC_006090.4	62619820	62619948	NC_006090.4.1-90000000.243397	0.34901	0.24623	5.45508	27.334	0	0
NC_006090.4	63520727	63520847	NC_006090.4.1-90000000.246581	0.4387	0.36338	3.1288	12.0594	0	0.0236919
NC_006090.4	64584608	64584750	NC_006090.4.1-90000000.249910	0.47874	0.393	3.18765	15.075	0	0.00552615
NC_006090.4	64712309	64712521	NC_006090.4.1-90000000.250229	0.25662	0.21549	2.96989	11.5869	0	0.0313782
NC_006090.4	65210986	65211145	NC_006090.4.1-90000000.252011	0.44162	0.37215	2.95731	14.6999	0	0.00783237
NC_006090.4	65212474	65212664	NC_006090.4.1-90000000.252027	0.33294	0.28452	2.77289	11.4015	0	0.0354766
NC_006090.4	65293343	65293462	NC_006090.4.1-90000000.252338	0.36405	0.27666	4.30913	18.3713	0	0
NC_006090.4	65700073	65700217	NC_006090.4.1-90000000.253387	0.44954	0.37777	2.99276	13.8727	0	0.0125126
NC_006090.4	66144809	66144947	NC_006090.4.1-90000000.255156	0.39373	0.26886	6.19119	35.3025	0	0
NC_006090.4	66339883	66340226	NC_006090.4.1-90000000.256020	0.33457	0.29131	2.57256	14.0785	0	0.0104502
NC_006090.4	66802977	66803153	NC_006090.4.1-90000000.257534	0.35834	0.29724	3.09379	14.5614	0	0.00873001
NC_006090.4	68184982	68185102	NC_006090.4.1-90000000.263202	0.37488	0.29159	3.78891	14.8187	0	0.00679681
NC_006090.4	68522916	68523157	NC_006090.4.1-90000000.264651	0.17803	0.147	3.18977	10.9155	0	0.0477371
NC_006090.4	68609268	68609390	NC_006090.4.1-90000000.265219	0.29631	0.22984	4.02483	13.7325	0	0.0127473
NC_006090.4	68713780	68714009	NC_006090.4.1-90000000.265855	0.25673	0.21068	3.3188	15.3432	0	0.00552615
NC_006090.4	69348847	69348995	NC_006090.4.1-90000000.268207	0.34328	0.28423	3.27982	12.5826	0	0.0228223
NC_006090.4	69431719	69432169	NC_006090.4.1-90000000.268563	0.32676	0.29552	2.0677	11.9264	0	0.0236919
NC_006090.4	69478961	69479075	NC_006090.4.1-90000000.268719	0.36783	0.29159	3.71869	14.1613	0	0.0104502
NC_006090.4	69481696	69481817	NC_006090.4.1-90000000.268729	0.38421	0.32428	3.44569	11.0151	0	0.0452869
NC_006090.4	69562649	69563164	NC_006090.4.1-90000000.268996	0.38717	0.35335	1.97413	13.4608	0	0.0135875
NC_006090.4	69577132	69577248	NC_006090.4.1-90000000.269049	0.3249	0.2492	4.14258	16.0075	0	0.00478024
NC_006090.4	69639363	69639503	NC_006090.4.1-90000000.269217	0.27912	0.21881	3.85289	13.778	0	0.0127473
NC_006090.4	69652063	69652203	NC_006090.4.1-90000000.269239	0.27912	0.21881	3.85289	13.778	0	0.0127473
NC_006090.4	69658781	69659000	NC_006090.4.1-90000000.269264	0.42121	0.37187	2.38272	10.9009	0	0.0477371
NC_006090.4	69694821	69695109	NC_006090.4.1-90000000.269350	0.30598	0.26738	2.47456	12.0094	0	0.0236919
NC_006090.4	69755615	69755805	NC_006090.4.1-90000000.269470	0.43156	0.36297	2.97368	16.2337	0	0.00344405
NC_006090.4	69844281	69844487	NC_006090.4.1-90000000.269627	0.42718	0.3631	2.68616	13.6896	0	0.0127473
NC_006090.4	69871050	69871273	NC_006090.4.1-90000000.269679	0.30586	0.26086	2.77877	12.0881	0	0.0236919
NC_006090.4	70337522	70337763	NC_006090.4.1-90000000.270225	0.40137	0.34656	2.9117	15.7208	0	0.00478024
NC_006090.4	70741780	70742256	NC_006090.4.1-90000000.270854	0.23644	0.19691	3.10726	26.0428	0	0
NC_006090.4	71162293	71162479	NC_006090.4.1-90000000.272022	0.25142	0.19872	3.71462	15.5777	0	0.00552615
NC_006090.4	71197237	71197489	NC_006090.4.1-90000000.272172	0.15605	0.12504	3.86035	11.3499	0	0.037863
NC_006090.4	71199474	71199597	NC_006090.4.1-90000000.272174	0.38719	0.31702	3.27839	12.0203	0	0.0236919
NC_006090.4	71270581	71270933	NC_006090.4.1-90000000.272508	0.19224	0.1611	2.99233	14.3339	0	0.00873001
NC_006090.4	71378402	71378560	NC_006090.4.1-90000000.272878	0.41716	0.3277	3.52937	18.39	0	0
NC_006090.4	71822397	71822503	NC_006090.4.1-90000000.274232	0.47045	0.3664	3.67456	15.079	0	0.00552615
NC_006090.4	72108950	72109107	NC_006090.4.1-90000000.275478	0.37646	0.29762	3.79073	18.5058	0	0
NC_006090.4	72168234	72168337	NC_006090.4.1-90000000.275782	0.34544	0.27029	3.70183	11.5349	0	0.0313782
NC_006090.4	72202217	72202674	NC_006090.4.1-90000000.275954	0.27005	0.23706	2.43102	15.249	0	0.00552615
NC_006090.4	72219660	72219900	NC_006090.4.1-90000000.276021	0.31555	0.2662	2.90333	15.0353	0	0.00552615
NC_006090.4	72235255	72235464	NC_006090.4.1-90000000.276086	0.27138	0.22265	3.27672	15.0361	0	0.00552615
NC_006090.4	72500039	72500156	NC_006090.4.1-90000000.277212	0.41933	0.35214	6.14756	16.8656	0	0.00179387
NC_006090.4	72519234	72519527	NC_006090.4.1-90000000.277292	0.26029	0.21978	2.89239	15.3229	0	0.00552615
NC_006090.4	74133794	74134063	NC_006090.4.1-90000000.281592	0.37105	0.32334	2.51482	13.728	0	0.0127473
NC_006090.4	74153044	74153174	NC_006090.4.1-90000000.281669	0.41768	0.31915	4.98502	26.6232	0	0
NC_006090.4	74176097	74176278	NC_006090.4.1-90000000.281759	0.37508	0.32099	2.72879	11.0695	0	0.044216
NC_006090.4	74263835	74264064	NC_006090.4.1-90000000.282282	0.38963	0.32868	3.0959	18.704	0	0
NC_006090.4	74278519	74278766	NC_006090.4.1-90000000.282354	0.22912	0.19394	2.88141	11.455	0	0.0314832
NC_006090.4	74291260	74291507	NC_006090.4.1-90000000.282410	0.22912	0.19394	2.88141	11.455	0	0.0314832
NC_006090.4	74878282	74878389	NC_006090.4.1-90000000.283950	0.53533	0.43766	3.45363	14.3084	0	0.00873001
NC_006090.4	75071444	75071784	NC_006090.4.1-90000000.284475	0.21383	0.18178	2.81462	13.6712	0	0.0127473
NC_006090.4	75487055	75487295	NC_006090.4.1-90000000.286592	0.33083	0.27824	2.94663	16.4462	0	0.00179387
NC_006090.4	76219888	76220021	NC_006090.4.1-90000000.289474	0.40501	0.313	4.04229	20.3711	0	0
NC_006090.4	76600554	76600819	NC_006090.4.1-90000000.291480	0.2535	0.20916	3.28816	17.3158	0	0.00179387
NC_006090.4	76609736	76609857	NC_006090.4.1-90000000.291535	0.31865	0.25451	3.57204	11.6105	0	0.0310047
NC_006090.4	76927582	76927703	NC_006090.4.1-90000000.292728	0.41395	0.33104	3.68302	15.9501	0	0.00478024
NC_006090.4	77681480	77681887	NC_006090.4.1-90000000.295742	0.18116	0.15538	2.71119	12.574	0	0.0228223
NC_006090.4	80536848	80536959	NC_006090.4.1-90000000.304229	0.3709	0.30401	3.63651	11.6271	0	0.0305082
NC_006090.4	81118903	81119316	NC_006090.4.1-90000000.305930	0.26879	0.23708	2.50125	14.0132	0	0.0104502
NC_006090.4	81453482	81453632	NC_006090.4.1-90000000.306855	0.38565	0.31314	3.25198	13.8558	0	0.0125126
NC_006090.4	83803247	83803400	NC_006090.4.1-90000000.313780	0.2812	0.23161	3.27246	10.8647	0	0.0498067
NC_006090.4	84176572	84176901	NC_006090.4.1-90000000.314863	0.3111	0.26694	2.70295	17.4418	0	0.00179387
NC_006090.4	84201596	84201732	NC_006090.4.1-90000000.314928	0.36515	0.29798	3.3454	13.2693	0	0.0151455
NC_006090.4	84691610	84691741	NC_006090.4.1-90000000.315611	0.423	0.33995	3.5657	16.7152	0	0.00179387
NC_006090.4	84702247	84702378	NC_006090.4.1-90000000.315636	0.423	0.33995	3.5657	16.7152	0	0.00179387
NC_006090.4	85863368	85863486	NC_006090.4.1-90000000.317201	0.53743	0.42637	3.5643	17.7279	0	0.00179387
NC_006090.4	86193745	86194089	NC_006090.4.1-90000000.317935	0.33321	0.27649	2.97653	22.9455	0	0
NC_006090.4	86290091	86290256	NC_006090.4.1-90000000.318088	0.36677	0.29087	3.5027	17.0273	0	0.00179387
NC_006090.4	86579015	86579189	NC_006090.4.1-90000000.318598	0.29419	0.2366	3.33662	13.4792	0	0.0135875
NC_006090.4	86777352	86777685	NC_006090.4.1-90000000.319092	0.28592	0.24341	2.8034	15.2464	0	0.00552615
NC_006090.4	87716501	87716638	NC_006090.4.1-90000000.322173	0.27699	0.21675	3.85397	13.256	0	0.0151455
NC_006090.4	87736733	87737164	NC_006090.4.1-90000000.322260	0.26965	0.24062	2.23079	11.4802	0	0.0314832
NC_006090.4	87739918	87740082	NC_006090.4.1-90000000.322286	0.29272	0.24383	4.00693	13.2735	0	0.0151455
NC_006090.4	87839472	87839913	NC_006090.4.1-90000000.322716	0.30445	0.26525	2.53243	18.7004	0	0
NC_006090.4	87903083	87903225	NC_006090.4.1-90000000.322997	0.41443	0.35432	2.95052	10.9061	0	0.0477371
NC_006090.4	89311239	89311447	NC_006090.4.1-90000000.327361	0.43308	0.38056	2.41024	11.0689	0	0.044216
NC_006090.4	90649424	90649572	NC_006090.4.90000001-111302122.804	0.3482	0.28415	3.29405	13.3781	0	0.0144011
NC_006090.4	92850423	92850571	NC_006090.4.90000001-111302122.6691	0.30634	0.24406	3.63102	13.7798	0	0.0127473
NC_006090.4	93079109	93079212	NC_006090.4.90000001-111302122.7057	0.19523	0.14049	5.13596	11.6811	0	0.0305082
NC_006090.4	93221874	93222145	NC_006090.4.90000001-111302122.7370	0.3134	0.26751	2.74928	15.3846	0	0.00552615
NC_006090.4	93456550	93456841	NC_006090.4.90000001-111302122.8272	0.10049	0.07581	4.79508	14.4535	0	0.00873001
NC_006090.4	93460858	93461023	NC_006090.4.90000001-111302122.8303	0.47216	0.39741	2.93511	15.5364	0	0.00552615
NC_006090.4	94344545	94345024	NC_006090.4.90000001-111302122.11160	0.32055	0.29096	2.033	11.538	0	0.0313782
NC_006090.4	94617578	94617782	NC_006090.4.90000001-111302122.11826	0.32562	0.27967	2.69324	10.8585	0	0.0498067
NC_006090.4	94857202	94857441	NC_006090.4.90000001-111302122.12602	0.27684	0.22148	3.59336	20.2185	0	0
NC_006090.4	95014152	95014323	NC_006090.4.90000001-111302122.13306	0.39476	0.31764	3.45467	18.622	0	0
NC_006090.4	95186387	95186559	NC_006090.4.90000001-111302122.13961	0.3685	0.30389	3.02466	13.9422	0	0.0115681
NC_006090.4	95493460	95493703	NC_006090.4.90000001-111302122.14950	0.41913	0.35961	2.73917	17.518	0	0.00179387
NC_006090.4	95493872	95494020	NC_006090.4.90000001-111302122.14954	0.34078	0.26975	3.44685	14.4229	0	0.00873001
NC_006090.4	95611711	95611899	NC_006090.4.90000001-111302122.15281	0.3	0.24298	3.49602	16.3935	0	0.00179387
NC_006090.4	95661915	95662664	NC_006090.4.90000001-111302122.15435	0.23704	0.20742	2.46416	23.8919	0	0
NC_006090.4	96165558	96165673	NC_006090.4.90000001-111302122.17448	0.36364	0.29033	3.56029	12.4597	0	0.0234278
NC_006090.4	97851654	97851766	NC_006090.4.90000001-111302122.23076	0.33506	0.24818	4.98406	20.1645	0	0
NC_006090.4	98393403	98393507	NC_006090.4.90000001-111302122.25378	0.41867	0.3171	4.31448	17.7913	0	0.00179387
NC_006090.4	98638090	98638425	NC_006090.4.90000001-111302122.26006	0.17913	0.14458	3.46041	17.9648	0	0.00179387
NC_006090.4	98673393	98673530	NC_006090.4.90000001-111302122.26041	0.50439	0.42689	2.84289	12.7364	0	0.0207695
NC_006090.4	99079827	99080019	NC_006090.4.90000001-111302122.26890	0.29072	0.23941	3.18164	13.1872	0	0.0161086
NC_006090.4	99677710	99677835	NC_006090.4.90000001-111302122.28598	0.15941	0.11383	5.17953	11.6411	0	0.0305082
NC_006090.4	99925953	99926484	NC_006090.4.90000001-111302122.29452	0.16892	0.14662	2.5671	13.4621	0	0.0135875
NC_006090.4	99945837	99946218	NC_006090.4.90000001-111302122.29523	0.15999	0.13274	3.11757	14.8446	0	0.00679681
NC_006090.4	100535904	100536082	NC_006090.4.90000001-111302122.30987	0.32478	0.27433	2.88409	11.7576	0	0.0298628
NC_006090.4	101033403	101033559	NC_006090.4.90000001-111302122.32702	0.46542	0.35584	4.15148	28.875	0	0
NC_006090.4	101058435	101059453	NC_006090.4.90000001-111302122.32837	0.16663	0.1484	2.27686	18.5116	0	0
NC_006090.4	101064059	101064262	NC_006090.4.90000001-111302122.32870	0.25486	0.20646	3.51813	15.193	0	0.00552615
NC_006090.4	101100450	101100597	NC_006090.4.90000001-111302122.33072	0.24967	0.19452	3.71048	12.0551	0	0.0236919
NC_006090.4	101117127	101117311	NC_006090.4.90000001-111302122.33126	0.29143	0.22853	3.84711	19.3431	0	0
NC_006090.4	101117313	101117538	NC_006090.4.90000001-111302122.33127	0.44047	0.38524	2.46684	13.1444	0	0.0177263
NC_006090.4	101122120	101122291	NC_006090.4.90000001-111302122.33141	0.39445	0.32528	3.19547	16.8256	0	0.00179387
NC_006090.4	101126556	101126960	NC_006090.4.90000001-111302122.33157	0.26245	0.20693	3.7797	35.4313	0	0
NC_006090.4	101129146	101129279	NC_006090.4.90000001-111302122.33161	0.42178	0.35225	3.07321	12.1794	0	0.0236919
NC_006090.4	101141059	101141282	NC_006090.4.90000001-111302122.33200	0.26305	0.21795	3.14645	14.2193	0	0.0104502
NC_006090.4	101198972	101199078	NC_006090.4.90000001-111302122.33398	0.20413	0.15015	4.77102	11.5283	0	0.0314832
NC_006090.4	101203402	101203713	NC_006090.4.90000001-111302122.33421	0.3119	0.26759	2.67183	15.5695	0	0.00552615
NC_006090.4	101205383	101205919	NC_006090.4.90000001-111302122.33426	0.10637	0.08959	2.9274	11.7661	0	0.0298628
NC_006090.4	101210236	101210340	NC_006090.4.90000001-111302122.33440	0.37171	0.29035	3.91596	13.9828	0	0.0104502
NC_006090.4	101253689	101253840	NC_006090.4.90000001-111302122.33606	0.18735	0.14499	4.01306	11.2395	0	0.0392782
NC_006090.4	101347155	101347351	NC_006090.4.90000001-111302122.33961	0.43329	0.37544	2.59647	12.2034	0	0.0236919
NC_006090.4	101461506	101461933	NC_006090.4.90000001-111302122.34404	0.32479	0.28627	2.3829	16.6947	0	0.00179387
NC_006090.4	101523698	101523822	NC_006090.4.90000001-111302122.34709	0.34079	0.26679	3.9042	15.019	0	0.00552615
NC_006090.4	101600339	101600649	NC_006090.4.90000001-111302122.35027	0.33688	0.29384	2.48839	14.2697	0	0.00990204
NC_006090.4	101644636	101645134	NC_006090.4.90000001-111302122.35256	0.2993	0.26464	2.53824	19.6317	0	0
NC_006090.4	101648813	101648940	NC_006090.4.90000001-111302122.35265	0.38172	0.3165	3.57979	12.8625	0	0.0205848
NC_006090.4	101662477	101662720	NC_006090.4.90000001-111302122.35343	0.37356	0.32336	2.55615	13.1327	0	0.0177263
NC_006090.4	101686227	101686348	NC_006090.4.90000001-111302122.35488	0.5525	0.43295	3.96026	21.438	0	0
NC_006090.4	101695361	101695574	NC_006090.4.90000001-111302122.35509	0.35246	0.29355	3.11452	17.1188	0	0.00179387
NC_006090.4	102207245	102207393	NC_006090.4.90000001-111302122.37807	0.42988	0.36065	2.99683	13.1179	0	0.0177263
NC_006090.4	102426733	102427069	NC_006090.4.90000001-111302122.38966	0.32024	0.28796	2.49097	11.7089	0	0.0302473
NC_006090.4	102573218	102573465	NC_006090.4.90000001-111302122.39516	0.2901	0.24847	2.72138	12.3162	0	0.0236919
NC_006090.4	102747848	102748023	NC_006090.4.90000001-111302122.40336	0.35331	0.28383	3.62169	19.4959	0	0
NC_006090.4	102753647	102753774	NC_006090.4.90000001-111302122.40354	0.3714	0.30766	3.13851	10.9764	0	0.0452869
NC_006090.4	102757805	102758120	NC_006090.4.90000001-111302122.40381	0.36601	0.30693	3.00079	24.9892	0	0
NC_006090.4	102883362	102883617	NC_006090.4.90000001-111302122.41012	0.33432	0.28628	2.90487	15.5627	0	0.00552615
NC_006090.4	103047702	103047819	NC_006090.4.90000001-111302122.41628	0.30234	0.24032	3.67081	11.0797	0	0.0430282
NC_006090.4	103137838	103137957	NC_006090.4.90000001-111302122.41957	0.44515	0.36976	3.14875	11.8145	0	0.0278711
NC_006090.4	103151214	103151816	NC_006090.4.90000001-111302122.42011	0.31732	0.28685	2.09162	15.9251	0	0.00478024
NC_006090.4	103162795	103163022	NC_006090.4.90000001-111302122.42058	0.29726	0.25197	2.85411	12.9597	0	0.0200656
NC_006090.4	103167523	103167648	NC_006090.4.90000001-111302122.42085	0.3713	0.30247	3.30576	11.7161	0	0.0302473
NC_006090.4	103197434	103197658	NC_006090.4.90000001-111302122.42210	0.3589	0.30118	2.97566	16.2975	0	0.00179387
NC_006090.4	103223098	103223273	NC_006090.4.90000001-111302122.42276	0.42205	0.34895	3.15397	17.3149	0	0.00179387
NC_006090.4	103274218	103274437	NC_006090.4.90000001-111302122.42394	0.31974	0.27274	2.77656	12.0468	0	0.0236919
NC_006090.4	103280532	103280656	NC_006090.4.90000001-111302122.42417	0.29448	0.23077	3.72536	12.163	0	0.0236919
NC_006090.4	103290510	103290754	NC_006090.4.90000001-111302122.42458	0.32138	0.27533	2.74576	13.7709	0	0.0127473
NC_006090.4	103318936	103319052	NC_006090.4.90000001-111302122.42559	0.29032	0.21186	4.92408	18.4524	0	0
NC_006090.4	103337802	103338067	NC_006090.4.90000001-111302122.42638	0.33666	0.26532	3.82631	30.8622	0	0
NC_006090.4	103342280	103342495	NC_006090.4.90000001-111302122.42665	0.43046	0.36444	2.9968	18.4249	0	0
NC_006090.4	103349105	103349356	NC_006090.4.90000001-111302122.42687	0.30725	0.24764	3.4919	22.6569	0	0
NC_006090.4	103356734	103356858	NC_006090.4.90000001-111302122.42707	0.29785	0.23199	3.98708	14.3486	0	0.00873001
NC_006090.4	103377610	103377899	NC_006090.4.90000001-111302122.42766	0.33645	0.29697	2.35063	11.1022	0	0.0425072
NC_006090.4	103449053	103449416	NC_006090.4.90000001-111302122.42937	0.25953	0.21948	2.86947	18.218	0	0.00179387
NC_006090.4	103462232	103462430	NC_006090.4.90000001-111302122.42999	0.24527	0.18741	4.2671	19.9815	0	0
NC_006090.4	103477695	103477989	NC_006090.4.90000001-111302122.43030	0.20603	0.16849	3.30885	16.5313	0	0.00179387
NC_006090.4	103567435	103567599	NC_006090.4.90000001-111302122.43253	0.31274	0.25558	3.29739	13.3288	0	0.0144011
NC_006090.4	103600597	103600765	NC_006090.4.90000001-111302122.43348	0.38506	0.3259	2.89381	13.2309	0	0.0151455
NC_006090.4	103601953	103602314	NC_006090.4.90000001-111302122.43353	0.21451	0.18611	2.5788	11.806	0	0.0278711
NC_006090.4	103602629	103602819	NC_006090.4.90000001-111302122.43355	0.27686	0.21121	4.23074	21.5164	0	0
NC_006090.4	103637878	103638069	NC_006090.4.90000001-111302122.43528	0.46622	0.40506	2.55167	12.6876	0	0.0207695
NC_006090.4	103661155	103661313	NC_006090.4.90000001-111302122.43626	0.37451	0.30261	3.58575	17.4021	0	0.00179387
NC_006090.4	103735794	103736148	NC_006090.4.90000001-111302122.43918	0.20714	0.17308	3.0291	16.4662	0	0.00179387
NC_006090.4	103736286	103736458	NC_006090.4.90000001-111302122.43919	0.36321	0.30226	3.17584	14.5788	0	0.00783237
NC_006090.4	103757070	103757337	NC_006090.4.90000001-111302122.44027	0.16875	0.13571	3.51581	13.7579	0	0.0127473
NC_006090.4	103765818	103766128	NC_006090.4.90000001-111302122.44061	0.16648	0.13405	3.69878	15.698	0	0.00478024
NC_006090.4	103784257	103784565	NC_006090.4.90000001-111302122.44154	0.29234	0.23439	3.53525	28.0198	0	0
NC_006090.4	103810869	103811124	NC_006090.4.90000001-111302122.44273	0.3996	0.34737	2.53086	14.1469	0	0.0104502
NC_006090.4	103815083	103815304	NC_006090.4.90000001-111302122.44296	0.24862	0.18037	4.97682	30.2838	0	0
NC_006090.4	103831245	103831361	NC_006090.4.90000001-111302122.44366	0.40196	0.32236	3.54718	11.9238	0	0.0236919
NC_006090.4	103906241	103906487	NC_006090.4.90000001-111302122.44685	0.24542	0.20303	3.1546	14.6335	0	0.00783237
NC_006090.4	103936937	103937152	NC_006090.4.90000001-111302122.44839	0.42916	0.37429	2.49378	12.632	0	0.0215888
NC_006090.4	108493845	108494123	NC_006090.4.90000001-111302122.62446	0.17702	0.14094	3.64491	16.7772	0	0.00179387
NC_006090.4	108494131	108494282	NC_006090.4.90000001-111302122.62447	0.26846	0.21048	3.85928	14.8341	0	0.00679681
NC_006090.4	108600065	108600311	NC_006090.4.90000001-111302122.62829	0.24936	0.18008	5.07037	34.5433	0	0
NC_006090.4	108639438	108639677	NC_006090.4.90000001-111302122.62967	0.28805	0.2368	3.24229	17.6614	0	0.00179387
NC_006090.4	108643107	108643580	NC_006090.4.90000001-111302122.62978	0.27748	0.24012	2.68034	20.4775	0	0
NC_006090.4	108779531	108779782	NC_006090.4.90000001-111302122.63511	0.25864	0.2161	3.01342	13.997	0	0.0104502
NC_006090.4	108795198	108795426	NC_006090.4.90000001-111302122.63572	0.2298	0.19128	3.12918	12.0704	0	0.0236919
NC_006090.4	108800283	108800512	NC_006090.4.90000001-111302122.63594	0.23395	0.19417	3.16922	12.6889	0	0.0207695
NC_006090.4	108808813	108808917	NC_006090.4.90000001-111302122.63621	0.21981	0.16303	4.66365	11.9093	0	0.0236919
NC_006090.4	108818653	108818848	NC_006090.4.90000001-111302122.63652	0.4489	0.39556	2.59636	11.8097	0	0.0278711
NC_006090.4	108957218	108957679	NC_006090.4.90000001-111302122.64093	0.09776	0.08045	3.21058	11.819	0	0.0278711
NC_006090.4	108993337	108993667	NC_006090.4.90000001-111302122.64191	0.21295	0.18195	2.78558	12.501	0	0.0228223
NC_006090.4	109018459	109019315	NC_006090.4.90000001-111302122.64271	0.11442	0.10044	2.41748	12.3156	0	0.0236919
NC_006090.4	109081308	109081594	NC_006090.4.90000001-111302122.64466	0.20078	0.16179	3.48046	17.1522	0	0.00179387
NC_006090.4	109126113	109126668	NC_006090.4.90000001-111302122.64616	0.12477	0.10664	2.74449	12.541	0	0.0228223
NC_006090.4	109572669	109572772	NC_006090.4.90000001-111302122.66250	0.44045	0.354	3.58934	14.0482	0	0.0104502
NC_006090.4	109652489	109652721	NC_006090.4.90000001-111302122.66534	0.40406	0.35161	2.45501	11.9963	0	0.0236919
NC_006090.4	109742326	109742564	NC_006090.4.90000001-111302122.66821	0.26495	0.22711	3.07586	12.5358	0	0.0228223
NC_006090.4	109757088	109757303	NC_006090.4.90000001-111302122.66854	0.26412	0.20516	4.01849	21.9752	0	0
NC_006090.4	109992779	109992993	NC_006090.4.90000001-111302122.68167	0.40328	0.34656	2.71726	14.1649	0	0.0104502
NC_006090.4	110245565	110245727	NC_006090.4.90000001-111302122.69249	0.34342	0.28957	2.91951	11.2312	0	0.0392782
NC_006090.4	110672073	110672196	NC_006090.4.90000001-111302122.70657	0.45414	0.38265	2.93429	10.9868	0	0.0452869
NC_006090.4	110673589	110673807	NC_006090.4.90000001-111302122.70663	0.33479	0.28621	2.77078	12.6954	0	0.0207695
NC_006090.4	110776926	110777094	NC_006090.4.90000001-111302122.70977	0.36202	0.30849	2.80063	11.2383	0	0.0392782
NC_006090.4	110821900	110822066	NC_006090.4.90000001-111302122.71105	0.35235	0.29614	3.09251	12.7917	0	0.0207695
NC_006091.4	796330	796480	NC_006091.4.4.2603	0.40493	0.33948	3.30036	13.6777	0	0.0127473
NC_006091.4	957843	957979	NC_006091.4.4.3734	0.15907	0.10064	7.14685	20.468	0	0
NC_006091.4	2213847	2214083	NC_006091.4.4.10020	0.28405	0.23019	3.55855	19.5814	0	0
NC_006091.4	2224743	2224935	NC_006091.4.4.10064	0.07482	0.05051	6.0273	11.007	0	0.0452869
NC_006091.4	2351285	2351465	NC_006091.4.4.10746	0.04831	0.02235	13.8115	14.2146	0	0.0104502
NC_006091.4	3700282	3700419	NC_006091.4.4.16723	0.37664	0.31088	3.20065	12.4971	0	0.0228223
NC_006091.4	3741550	3741776	NC_006091.4.4.16978	0.26992	0.21816	3.38665	16.921	0	0.00179387
NC_006091.4	3893009	3893205	NC_006091.4.4.17941	0.28231	0.21658	4.13541	22.6075	0	0
NC_006091.4	4579638	4579767	NC_006091.4.4.21579	0.40954	0.33861	3.20051	12.8602	0	0.0205848
NC_006091.4	4632221	4632491	NC_006091.4.4.21928	0.35474	0.29605	3.01741	21.0769	0	0
NC_006091.4	4694343	4694590	NC_006091.4.4.22308	0.2036	0.16539	3.3563	14.2053	0	0.0104502
NC_006091.4	4859764	4860045	NC_006091.4.4.23284	0.21583	0.18184	2.97511	12.4324	0	0.0234278
NC_006091.4	4872102	4872383	NC_006091.4.4.23348	0.21583	0.18184	2.97511	12.4324	0	0.0234278
NC_006091.4	4892185	4892307	NC_006091.4.4.23465	0.48079	0.38863	3.61053	17.0118	0	0.00179387
NC_006091.4	5023783	5023889	NC_006091.4.4.24099	0.40918	0.33239	3.37108	11.6017	0	0.0310047
NC_006091.4	5240865	5241054	NC_006091.4.4.25419	0.2761	0.22914	3.04097	11.9472	0	0.0236919
NC_006091.4	5242266	5242367	NC_006091.4.4.25426	0.50317	0.37135	4.52452	21.4559	0	0
NC_006091.4	5287715	5288345	NC_006091.4.4.25772	0.13227	0.11271	2.77587	15.709	0	0.00478024
NC_006091.4	5314084	5314376	NC_006091.4.4.25978	0.22264	0.18991	2.76239	11.663	0	0.0305082
NC_006091.4	5332365	5332485	NC_006091.4.4.26124	0.27939	0.22109	3.71938	11.2569	0	0.0392782
NC_006091.4	5389318	5389792	NC_006091.4.4.26557	0.14862	0.12134	3.32767	19.2417	0	0
NC_006091.4	5441160	5441752	NC_006091.4.4.26979	0.12539	0.10661	2.8075	14.0151	0	0.0104502
NC_006091.4	5445758	5445908	NC_006091.4.4.27012	0.46952	0.38527	3.21523	16.8968	0	0.00179387
NC_006091.4	5453396	5453654	NC_006091.4.4.27080	0.33696	0.29505	2.43389	11.2052	0	0.0392782
NC_006091.4	5547982	5548219	NC_006091.4.4.27633	0.21944	0.184	2.9809	10.9537	0	0.0472945
NC_006091.4	5864751	5864904	NC_006091.4.4.28888	0.21672	0.17173	3.751	10.8999	0	0.0477371
NC_006091.4	6116558	6116683	NC_006091.4.4.29550	0.5386	0.4465	3.00005	13.3897	0	0.0144011
NC_006091.4	6510322	6510525	NC_006091.4.4.30878	0.32171	0.27275	2.76903	11.2812	0	0.0385402
NC_006091.4	6531964	6532107	NC_006091.4.4.30970	0.32543	0.26982	3.17343	11.1836	0	0.0404367
NC_006091.4	7076363	7076678	NC_006091.4.4.33032	0.27296	0.23773	2.53708	12.336	0	0.0236919
NC_006091.4	7268347	7268519	NC_006091.4.4.33649	0.38189	0.29455	4.11604	24.6591	0	0
NC_006091.4	7320722	7320924	NC_006091.4.4.33822	0.34735	0.29811	2.6981	11.8072	0	0.0278711
NC_006091.4	7427020	7427144	NC_006091.4.4.34251	0.43657	0.36456	3.2047	11.8065	0	0.0278711
NC_006091.4	7465792	7465894	NC_006091.4.4.34371	0.44543	0.36599	3.2741	11.166	0	0.0413656
NC_006091.4	7630592	7630870	NC_006091.4.4.35033	0.2707	0.23164	2.72795	12.9992	0	0.0200656
NC_006091.4	8078772	8078918	NC_006091.4.4.36415	0.41816	0.34345	3.08598	12.8668	0	0.0205848
NC_006091.4	8595917	8596119	NC_006091.4.4.38261	0.27154	0.22683	3.02429	12.2729	0	0.0236919
NC_006091.4	8660254	8660443	NC_006091.4.4.38451	0.44797	0.37778	2.80316	15.3578	0	0.00552615
NC_006091.4	9281833	9282104	NC_006091.4.4.40828	0.25143	0.21457	2.68068	11.3215	0	0.038181
NC_006091.4	9647783	9647940	NC_006091.4.4.42036	0.46059	0.38331	2.9313	13.8389	0	0.0125126
NC_006091.4	9779659	9779760	NC_006091.4.4.42288	0.54576	0.43358	3.36789	13.8779	0	0.0125126
NC_006091.4	10243492	10243648	NC_006091.4.4.43767	0.29013	0.2313	3.52289	13.1927	0	0.0161086
NC_006091.4	10811403	10811570	NC_006091.4.4.45765	0.38808	0.31758	3.1569	14.8598	0	0.00679681
NC_006091.4	10841109	10841339	NC_006091.4.4.45956	0.28859	0.22975	3.49931	19.8036	0	0
NC_006091.4	10854357	10854510	NC_006091.4.4.46050	0.31308	0.24502	3.63069	14.5042	0	0.00873001
NC_006091.4	12709225	12709390	NC_006091.4.4.54582	0.43904	0.37611	2.72807	12.3194	0	0.0236919
NC_006091.4	13893721	13893869	NC_006091.4.4.60077	0.32144	0.2645	3.41171	11.9695	0	0.0236919
NC_006091.4	14353176	14353294	NC_006091.4.4.62396	0.32129	0.25173	3.80339	12.9721	0	0.0200656
NC_006091.4	14450761	14450869	NC_006091.4.4.62800	0.39143	0.28258	5.11617	23.8285	0	0
NC_006091.4	14505466	14505699	NC_006091.4.4.63103	0.40087	0.35279	2.41394	11.4518	0	0.0314832
NC_006091.4	14757943	14758081	NC_006091.4.4.64213	0.30098	0.20935	5.56655	26.8456	0	0
NC_006091.4	14758090	14758197	NC_006091.4.4.64214	0.37377	0.30382	3.49431	11.3894	0	0.0367743
NC_006091.4	14985874	14986256	NC_006091.4.4.64942	0.35091	0.31665	2.10739	11.2583	0	0.0391705
NC_006091.4	15095714	15095867	NC_006091.4.4.65328	0.39077	0.33277	3.10577	10.9966	0	0.0452869
NC_006091.4	15112296	15112396	NC_006091.4.4.65389	0.53542	0.4419	3.19116	12.8056	0	0.0207695
NC_006091.4	15481732	15482072	NC_006091.4.4.66750	0.23113	0.18611	3.52433	23.2998	0	0
NC_006091.4	15517272	15517479	NC_006091.4.4.66970	0.30734	0.25912	2.96341	13.0475	0	0.0195239
NC_006091.4	15610940	15611108	NC_006091.4.4.67505	0.40958	0.33097	3.58678	20.2168	0	0
NC_006091.4	15973911	15974203	NC_006091.4.4.69031	0.43311	0.38495	2.27386	13.0956	0	0.0177263
NC_006091.4	16066941	16067099	NC_006091.4.4.69525	0.39289	0.32932	3.02661	13.04	0	0.0195239
NC_006091.4	16926168	16926397	NC_006091.4.4.73424	0.19828	0.13754	5.76783	31.165	0	0
NC_006091.4	16984508	16984634	NC_006091.4.4.73766	0.36543	0.29692	3.38574	12.1667	0	0.0236919
NC_006091.4	17207122	17207259	NC_006091.4.4.74876	0.27952	0.20971	4.48233	17.5966	0	0.00179387
NC_006091.4	17549768	17550013	NC_006091.4.4.76520	0.3785	0.33119	2.84351	13.9002	0	0.0125126
NC_006091.4	17623540	17623763	NC_006091.4.4.76786	0.40895	0.32026	4.27673	32.475	0	0
NC_006091.4	17857661	17857922	NC_006091.4.4.77796	0.13968	0.11236	3.51331	11.0075	0	0.0452869
NC_006091.4	17870930	17871405	NC_006091.4.4.77898	0.20578	0.17996	2.46607	13.296	0	0.0151455
NC_006091.4	17921807	17922037	NC_006091.4.4.78273	0.33999	0.29416	2.61802	11.5325	0	0.0313782
NC_006091.4	17980125	17980410	NC_006091.4.4.78646	0.23701	0.19525	3.21483	17.0997	0	0.00179387
NC_006091.4	18005519	18005928	NC_006091.4.4.78823	0.16891	0.14174	2.95165	14.7243	0	0.00783237
NC_006091.4	18040924	18041097	NC_006091.4.4.79042	0.38098	0.3202	2.96413	13.6762	0	0.0127473
NC_006091.4	18057633	18057980	NC_006091.4.4.79153	0.16922	0.13168	3.96827	22.2189	0	0
NC_006091.4	18077294	18077567	NC_006091.4.4.79242	0.17253	0.14274	3.14791	11.4771	0	0.0314832
NC_006091.4	18305226	18306082	NC_006091.4.4.80306	0.13949	0.12381	2.23172	12.0886	0	0.0236919
NC_006091.4	18366801	18367440	NC_006091.4.4.80617	0.24193	0.21236	2.3547	17.8185	0	0.00179387
NC_006091.4	18407141	18407316	NC_006091.4.4.80858	0.31953	0.23218	5.23451	28.7396	0	0
NC_006091.4	18414500	18414956	NC_006091.4.4.80890	0.15066	0.12442	3.06286	15.4866	0	0.00552615
NC_006091.4	18451173	18451288	NC_006091.4.4.81123	0.56114	0.4723	2.81298	11.0836	0	0.0430282
NC_006091.4	18483942	18484792	NC_006091.4.4.81335	0.15724	0.13095	3.24933	30.1424	0	0
NC_006091.4	18545219	18545453	NC_006091.4.4.81604	0.32721	0.28272	2.82413	12.2295	0	0.0236919
NC_006091.4	18655509	18655872	NC_006091.4.4.82217	0.37579	0.33339	2.20493	12.7287	0	0.0207695
NC_006091.4	20008855	20009156	NC_006091.4.4.83902	0.16638	0.13701	3.07126	11.3498	0	0.037863
NC_006091.4	20248447	20248681	NC_006091.4.4.84801	0.36215	0.30309	2.92336	16.4882	0	0.00179387
NC_006091.4	21674098	21674223	NC_006091.4.4.88995	0.40319	0.3371	3.05243	10.9298	0	0.0472945
NC_006091.4	22626509	22626772	NC_006091.4.4.91361	0.3428	0.2808	3.31938	23.3466	0	0
NC_006091.4	22637755	22637959	NC_006091.4.4.91388	0.41624	0.3576	2.70999	13.458	0	0.0135875
NC_006091.4	24024852	24025003	NC_006091.4.4.93665	0.4244	0.35482	3.18918	13.6113	0	0.0127473
NC_006091.4	24491434	24491545	NC_006091.4.4.95175	0.33201	0.25456	4.23315	15.3199	0	0.00552615
NC_006091.4	25369765	25369868	NC_006091.4.4.96858	0.55049	0.43074	3.69559	17.0738	0	0.00179387
NC_006091.4	25806812	25807157	NC_006091.4.4.98149	0.27734	0.23945	2.87292	15.8001	0	0.00478024
NC_006091.4	25923431	25923562	NC_006091.4.4.98478	0.38568	0.30841	3.58132	14.8985	0	0.00552615
NC_006091.4	26141765	26141989	NC_006091.4.4.99191	0.4263	0.3595	2.92422	19.0369	0	0
NC_006091.4	26386278	26386464	NC_006091.4.4.99909	0.28413	0.23519	3.03191	11.779	0	0.0298628
NC_006091.4	26493717	26493910	NC_006091.4.4.100164	0.26102	0.20909	3.59365	16.001	0	0.00478024
NC_006091.4	26878903	26879280	NC_006091.4.4.101299	0.2784	0.24492	2.47311	13.7125	0	0.0127473
NC_006091.4	26962471	26962624	NC_006091.4.4.101551	0.27532	0.22259	3.47468	12.1844	0	0.0236919
NC_006091.4	27131477	27131752	NC_006091.4.4.102301	0.34636	0.29998	2.65744	14.0315	0	0.0104502
NC_006091.4	27358716	27359131	NC_006091.4.4.103164	0.14995	0.12835	2.73731	10.9543	0	0.0472945
NC_006091.4	27426775	27426914	NC_006091.4.4.103351	0.48816	0.38148	3.99814	24.2286	0	0
NC_006091.4	27662038	27662272	NC_006091.4.4.104060	0.14612	0.10763	4.72402	17.1438	0	0.00179387
NC_006091.4	27662275	27662378	NC_006091.4.4.104061	0.30019	0.23467	4.07686	11.521	0	0.0314832
NC_006091.4	27668486	27668670	NC_006091.4.4.104091	0.28819	0.22807	3.72683	17.6629	0	0.00179387
NC_006091.4	27799185	27799346	NC_006091.4.4.104543	0.49564	0.38547	3.99497	27.4544	0	0
NC_006091.4	28151730	28151842	NC_006091.4.4.105701	0.60099	0.46866	3.78384	19.5926	0	0
NC_006091.4	28242464	28242577	NC_006091.4.4.105922	0.50324	0.41792	3.62976	14.5618	0	0.00873001
NC_006091.4	28325611	28325771	NC_006091.4.4.106130	0.49833	0.40408	3.4217	18.4213	0	0
NC_006091.4	28755377	28755526	NC_006091.4.4.107023	0.34049	0.28525	2.99031	10.9588	0	0.0470101
NC_006091.4	28907534	28907701	NC_006091.4.4.107480	0.23665	0.17316	4.83303	20.711	0	0
NC_006091.4	29087625	29087743	NC_006091.4.4.108144	0.41388	0.32334	4.27408	18.5447	0	0
NC_006091.4	31408252	31408521	NC_006091.4.4.116566	0.18374	0.14917	3.38177	14.381	0	0.00873001
NC_006091.4	32026556	32026756	NC_006091.4.4.119008	0.32315	0.27485	2.8243	11.7326	0	0.0302473
NC_006091.4	32619130	32619307	NC_006091.4.4.121217	0.34165	0.29047	2.85354	11.2398	0	0.0392782
NC_006091.4	32692568	32692869	NC_006091.4.4.121542	0.24306	0.20882	2.72133	12.3713	0	0.0236919
NC_006091.4	34144490	34144619	NC_006091.4.4.126999	0.4173	0.31027	4.74102	25.4021	0	0
NC_006091.4	34720744	34720916	NC_006091.4.4.129256	0.23509	0.18502	3.81917	14.6769	0	0.00783237
NC_006091.4	37929039	37929169	NC_006091.4.4.138271	0.21079	0.15549	4.91962	13.9476	0	0.0115681
NC_006091.4	38008017	38008202	NC_006091.4.4.138578	0.38457	0.33097	2.82659	12.1933	0	0.0236919
NC_006091.4	38070946	38071089	NC_006091.4.4.138953	0.46981	0.38327	3.32116	17.2528	0	0.00179387
NC_006091.4	38122963	38123063	NC_006091.4.4.139212	0.37394	0.27157	5.16371	20.0018	0	0
NC_006091.4	38172295	38172570	NC_006091.4.4.139457	0.14251	0.11166	3.85129	14.3308	0	0.00873001
NC_006091.4	39197592	39197738	NC_006091.4.4.143627	0.34014	0.27638	3.4377	13.768	0	0.0127473
NC_006091.4	39224579	39224790	NC_006091.4.4.143788	0.32875	0.2601	3.74039	24.1268	0	0
NC_006091.4	39884252	39884512	NC_006091.4.4.146080	0.2298	0.19232	3.00346	12.9315	0	0.0200656
NC_006091.4	40457084	40457288	NC_006091.4.4.148865	0.49461	0.42849	2.86526	16.6991	0	0.00179387
NC_006091.4	40849365	40849513	NC_006091.4.4.150393	0.38722	0.31901	3.51466	15.23	0	0.00552615
NC_006091.4	40935017	40935185	NC_006091.4.4.150731	0.21401	0.1665	3.97254	13.7754	0	0.0127473
NC_006091.4	41118900	41119036	NC_006091.4.4.151324	0.4123	0.34445	3.43086	13.5505	0	0.0127473
NC_006091.4	41187153	41187627	NC_006091.4.4.151473	0.28872	0.24988	2.6404	20.9817	0	0
NC_006091.4	41572293	41572725	NC_006091.4.4.152271	0.1754	0.15207	2.57754	11.2264	0	0.0392782
NC_006091.4	41860016	41860158	NC_006091.4.4.153128	0.45504	0.3482	4.22534	26.3858	0	0
NC_006091.4	41910142	41910296	NC_006091.4.4.153269	0.24718	0.18912	4.27324	16.665	0	0.00179387
NC_006091.4	41922112	41922421	NC_006091.4.4.153296	0.2939	0.25085	2.77715	15.681	0	0.00478024
NC_006091.4	42054813	42055048	NC_006091.4.4.153644	0.315	0.269	2.76224	12.9373	0	0.0200656
NC_006091.4	42106436	42106871	NC_006091.4.4.153779	0.23275	0.20433	2.43436	13.1892	0	0.0161086
NC_006091.4	42248432	42248617	NC_006091.4.4.154158	0.40658	0.35107	2.60442	11.628	0	0.0305082
NC_006091.4	42933244	42933489	NC_006091.4.4.156002	0.34022	0.27376	3.48994	23.9205	0	0
NC_006091.4	43699336	43699700	NC_006091.4.4.158274	0.24707	0.21337	2.81923	15.3052	0	0.00552615
NC_006091.4	43705022	43705129	NC_006091.4.4.158303	0.444	0.35448	3.65254	14.3287	0	0.00873001
NC_006091.4	43766222	43766808	NC_006091.4.4.158554	0.16045	0.14122	2.48881	12.5323	0	0.0228223
NC_006091.4	44476861	44476975	NC_006091.4.4.160140	0.33916	0.27317	3.5306	11.5481	0	0.0313782
NC_006091.4	45686282	45686435	NC_006091.4.4.163495	0.31248	0.25233	3.45334	14.1454	0	0.0104502
NC_006091.4	47588617	47588745	NC_006091.4.4.168009	0.41196	0.3277	3.45184	13.1296	0	0.0177263
NC_006091.4	48133323	48133436	NC_006091.4.4.168799	0.46629	0.36835	3.65681	16.5391	0	0.00179387
NC_006091.4	48154173	48154279	NC_006091.4.4.168868	0.44188	0.36098	3.30993	11.3516	0	0.0373116
NC_006091.4	48346909	48347013	NC_006091.4.4.169589	0.27506	0.20694	4.40573	12.9728	0	0.0200656
NC_006091.4	48778158	48778436	NC_006091.4.4.171533	0.31385	0.26639	3.21322	18.6456	0	0
NC_006091.4	48821846	48822030	NC_006091.4.4.171660	0.45454	0.39171	2.64572	12.8119	0	0.0205848
NC_006091.4	50958377	50958552	NC_006091.4.4.178587	0.40497	0.29717	3.78407	19.8813	0	0
NC_006091.4	51358377	51358717	NC_006091.4.4.179350	0.23959	0.21503	6.43443	17.2813	0	0.00179387
NC_006091.4	51518000	51518156	NC_006091.4.4.179995	0.397	0.30732	4.55047	24.8377	0	0
NC_006091.4	51645242	51645422	NC_006091.4.4.180426	0.38855	0.30173	3.86027	23.7582	0	0
NC_006091.4	52507639	52507772	NC_006091.4.4.183691	0.4245	0.33523	3.91578	19.2539	0	0
NC_006091.4	52572281	52572508	NC_006091.4.4.184054	0.40383	0.33793	3.90866	23.3676	0	0
NC_006091.4	52808350	52808644	NC_006091.4.4.185100	0.30675	0.26535	2.63933	13.8084	0	0.0127473
NC_006091.4	52811210	52811373	NC_006091.4.4.185114	0.31531	0.24926	3.72818	17.1481	0	0.00179387
NC_006091.4	53289423	53289617	NC_006091.4.4.187359	0.46069	0.40329	2.46495	11.6228	0	0.0310047
NC_006091.4	53383752	53384019	NC_006091.4.4.187794	0.24607	0.19894	3.46307	18.4018	0	0
NC_006091.4	53482056	53482296	NC_006091.4.4.188217	0.16501	0.12283	4.55691	19.5879	0	0
NC_006091.4	53555162	53555362	NC_006091.4.4.188573	0.29505	0.24929	2.94094	11.4736	0	0.0314832
NC_006091.4	53566583	53566767	NC_006091.4.4.188620	0.41161	0.34682	2.95389	15.0773	0	0.00552615
NC_006091.4	53849187	53849287	NC_006091.4.4.189986	0.56908	0.45685	3.49073	15.6523	0	0.00478024
NC_006091.4	54466117	54466273	NC_006091.4.4.191918	0.43361	0.35441	3.31667	17.2717	0	0.00179387
NC_006091.4	54686318	54686534	NC_006091.4.4.192721	0.2752	0.22821	3.1159	13.9922	0	0.0104502
NC_006091.4	54810130	54810390	NC_006091.4.4.193257	0.15531	0.11892	4.19091	17.4461	0	0.00179387
NC_006091.4	54869501	54869746	NC_006091.4.4.193515	0.18008	0.14125	3.82732	16.2339	0	0.00344405
NC_006091.4	54917011	54917194	NC_006091.4.4.193658	0.27795	0.22149	3.64081	17.0716	0	0.00179387
NC_006091.4	54995552	54995684	NC_006091.4.4.193966	0.42975	0.34056	3.8623	17.9434	0	0.00179387
NC_006091.4	55195572	55195769	NC_006091.4.4.194780	0.45131	0.3796	3.03888	18.7399	0	0
NC_006091.4	55250463	55250635	NC_006091.4.4.194955	0.46556	0.39087	2.97584	16.2892	0	0.00344405
NC_006091.4	55290162	55290312	NC_006091.4.4.195116	0.43809	0.35672	3.37896	17.3148	0	0.00179387
NC_006091.4	55461525	55461721	NC_006091.4.4.195724	0.30998	0.2594	3	13.2306	0	0.0151455
NC_006091.4	55478505	55478609	NC_006091.4.4.195776	0.50645	0.41482	3.46224	13.4728	0	0.0135875
NC_006091.4	55530484	55530671	NC_006091.4.4.195970	0.31962	0.25595	3.58738	18.2339	0	0.00179387
NC_006091.4	55531189	55531311	NC_006091.4.4.195975	0.28811	0.21712	4.39658	15.8608	0	0.00478024
NC_006091.4	55566634	55566788	NC_006091.4.4.196125	0.24543	0.19525	3.67843	12.5927	0	0.0228223
NC_006091.4	55717176	55717348	NC_006091.4.4.196448	0.40886	0.34666	3.00983	12.2928	0	0.0236919
NC_006091.4	55723566	55723706	NC_006091.4.4.196466	0.43958	0.35245	3.55702	18.9132	0	0
NC_006091.4	55791070	55791392	NC_006091.4.4.196625	0.26805	0.2341	2.77731	13.0281	0	0.0195239
NC_006091.4	55836113	55836398	NC_006091.4.4.196700	0.29844	0.25949	2.61267	12.4473	0	0.0234278
NC_006091.4	55846987	55847124	NC_006091.4.4.196727	0.47824	0.39147	3.3371	16.6159	0	0.00179387
NC_006091.4	55901074	55901286	NC_006091.4.4.196784	0.31288	0.23064	4.73593	32.2457	0	0
NC_006091.4	55928629	55928937	NC_006091.4.4.196833	0.40689	0.35738	2.40574	15.1098	0	0.00552615
NC_006091.4	56044912	56045272	NC_006091.4.4.197049	0.26403	0.20715	3.8468	33.9742	0	0
NC_006091.4	56058065	56058214	NC_006091.4.4.197076	0.34021	0.27156	3.71207	15.1917	0	0.00552615
NC_006091.4	56111766	56112046	NC_006091.4.4.197235	0.30416	0.26402	2.55238	12.4011	0	0.0236919
NC_006091.4	56123920	56124216	NC_006091.4.4.197266	0.28743	0.24354	3.26639	18.754	0	0
NC_006091.4	56140671	56140782	NC_006091.4.4.197323	0.23854	0.17312	5.15167	14.5297	0	0.00873001
NC_006091.4	56175559	56175786	NC_006091.4.4.197420	0.26642	0.22093	3.16289	14.3487	0	0.00873001
NC_006091.4	56182820	56182970	NC_006091.4.4.197440	0.43274	0.35754	3.17092	15.4678	0	0.00552615
NC_006091.4	56204704	56204911	NC_006091.4.4.197485	0.31724	0.27193	2.72083	11.0545	0	0.0447492
NC_006091.4	56233753	56233998	NC_006091.4.4.197568	0.35462	0.27956	4.12408	28.926	0	0
NC_006091.4	56289315	56289607	NC_006091.4.4.197696	0.33459	0.2927	2.46154	12.9314	0	0.0200656
NC_006091.4	56303089	56303328	NC_006091.4.4.197721	0.34139	0.29467	2.99422	14.6301	0	0.00783237
NC_006091.4	56370643	56370753	NC_006091.4.4.197841	0.38005	0.30788	3.3705	11.1862	0	0.0404367
NC_006091.4	56400982	56401238	NC_006091.4.4.197870	0.3386	0.26644	3.92342	29.2832	0	0
NC_006091.4	56404984	56405201	NC_006091.4.4.197882	0.31428	0.26103	3.10479	15.8146	0	0.00478024
NC_006091.4	56420398	56420669	NC_006091.4.4.197913	0.37088	0.32188	2.59736	14.4945	0	0.00873001
NC_006091.4	56500850	56501159	NC_006091.4.4.198223	0.18123	0.15326	2.92553	11.4154	0	0.0335011
NC_006091.4	56511714	56511929	NC_006091.4.4.198264	0.37681	0.31613	2.99592	17.2313	0	0.00179387
NC_006091.4	57002672	57002775	NC_006091.4.4.199647	0.39056	0.31312	3.65933	12.5043	0	0.0228223
NC_006091.4	57137694	57138133	NC_006091.4.4.200116	0.13576	0.11508	2.86481	12.0717	0	0.0236919
NC_006091.4	57404779	57404901	NC_006091.4.4.200800	0.33325	0.26064	4.12396	15.576	0	0.00552615
NC_006091.4	57495062	57495196	NC_006091.4.4.201073	0.2296	0.17073	4.71548	15.1949	0	0.00552615
NC_006091.4	57704118	57704254	NC_006091.4.4.201957	0.271	0.20137	4.84295	18.9797	0	0
NC_006091.4	57906507	57906610	NC_006091.4.4.202791	0.47397	0.3664	4.19385	20.1426	0	0
NC_006091.4	57966696	57966895	NC_006091.4.4.203102	0.35996	0.29739	3.18811	17.655	0	0.00179387
NC_006091.4	58913643	58913748	NC_006091.4.4.206762	0.29079	0.20705	5.42125	18.7555	0	0
NC_006091.4	59439708	59439921	NC_006091.4.4.209048	0.37743	0.32391	2.75024	13.4851	0	0.0127473
NC_006091.4	62052171	62052412	NC_006091.4.4.216920	0.31851	0.27427	2.65806	12.7354	0	0.0207695
NC_006091.4	63781644	63781803	NC_006091.4.4.222046	0.40996	0.34118	2.8372	11.5282	0	0.0314832
NC_006091.4	66797994	66798181	NC_006091.4.4.231531	0.28584	0.2369	3.13647	12.5546	0	0.0228223
NC_006091.4	68100127	68100430	NC_006091.4.4.234811	0.30291	0.25945	2.72329	15.8025	0	0.00478024
NC_006091.4	69851006	69851167	NC_006091.4.4.241052	0.20236	0.15292	4.33115	14.5074	0	0.00873001
NC_006091.4	70612397	70612597	NC_006091.4.4.243634	0.44416	0.38294	2.5597	12.0657	0	0.0236919
NC_006091.4	70774876	70774984	NC_006091.4.4.244061	0.41886	0.30863	4.78375	22.3216	0	0
NC_006091.4	70881783	70882123	NC_006091.4.4.244331	0.28622	0.25051	2.44493	13.2925	0	0.0151455
NC_006091.4	70957314	70957603	NC_006091.4.4.244564	0.33542	0.28986	2.61536	14.8162	0	0.00679681
NC_006091.4	71034064	71034340	NC_006091.4.4.244789	0.20099	0.16927	2.9246	11.3557	0	0.0373116
NC_006091.4	71378674	71378988	NC_006091.4.4.245537	0.25298	0.21897	2.59433	12.2377	0	0.0236919
NC_006091.4	71507468	71507721	NC_006091.4.4.245737	0.21009	0.17524	3.04731	11.3233	0	0.038181
NC_006091.4	71607860	71608005	NC_006091.4.4.245835	0.33474	0.26653	3.54654	14.2066	0	0.0104502
NC_006091.4	71816737	71816994	NC_006091.4.4.246092	0.34357	0.29646	2.63032	13.984	0	0.0104502
NC_006091.4	72044964	72045125	NC_006091.4.4.246424	0.3446	0.27869	3.47563	16.2083	0	0.00344405
NC_006091.4	72221212	72221644	NC_006091.4.4.246848	0.23231	0.2059	2.31383	11.7325	0	0.0302473
NC_006091.4	72288087	72288288	NC_006091.4.4.247072	0.2958	0.24003	3.42788	15.9566	0	0.00478024
NC_006091.4	72345990	72346137	NC_006091.4.4.247297	0.41293	0.33078	3.56811	17.1445	0	0.00179387
NC_006091.4	72411383	72411520	NC_006091.4.4.247383	0.47891	0.3946	3.16796	15.3266	0	0.00552615
NC_006091.4	72562235	72562490	NC_006091.4.4.247550	0.45195	0.39762	2.39443	13.7094	0	0.0127473
NC_006091.4	72735077	72735323	NC_006091.4.4.247761	0.37581	0.33453	2.50908	10.8653	0	0.0498067
NC_006091.4	72836722	72836958	NC_006091.4.4.247939	0.26144	0.22015	2.92573	13.1174	0	0.0177263
NC_006091.4	72967620	72967728	NC_006091.4.4.248077	0.45192	0.364	3.22608	11.1607	0	0.0413656
NC_006091.4	73074982	73075221	NC_006091.4.4.248254	0.20561	0.16667	3.4181	14.1461	0	0.0104502
NC_006091.4	73211958	73212154	NC_006091.4.4.248522	0.41601	0.36633	3.31398	12.1088	0	0.0236919
NC_006091.4	73285426	73285708	NC_006091.4.4.248730	0.375	0.33198	2.44084	12.5866	0	0.0228223
NC_006091.4	73308209	73308334	NC_006091.4.4.248783	0.45871	0.36613	3.59267	17.6751	0	0.00179387
NC_006091.4	73350234	73350397	NC_006091.4.4.248953	0.46517	0.36823	3.15657	15.6251	0	0.00552615
NC_006091.4	74031587	74031802	NC_006091.4.4.251477	0.29868	0.24823	3.11305	14.6712	0	0.00783237
NC_006091.4	74095415	74095889	NC_006091.4.4.251787	0.28667	0.24843	2.59166	19.7835	0	0
NC_006091.4	74440165	74440565	NC_006091.4.4.253525	0.20302	0.17797	2.57683	11.3323	0	0.038181
NC_006091.4	74558374	74558570	NC_006091.4.4.254368	0.39328	0.33016	3.22222	17.3338	0	0.00179387
NC_006091.4	74624292	74624397	NC_006091.4.4.254810	0.4023	0.2936	4.91866	21.617	0	0
NC_006091.4	74708374	74708555	NC_006091.4.4.255305	0.38649	0.3325	2.72861	11.1219	0	0.0413656
NC_006091.4	74741048	74741194	NC_006091.4.4.255465	0.33734	0.26579	3.8484	17.8505	0	0.00179387
NC_006091.4	74767634	74768001	NC_006091.4.4.255623	0.29012	0.24733	2.7902	19.1302	0	0
NC_006091.4	74787451	74787720	NC_006091.4.4.255718	0.33379	0.29158	2.40158	11.2271	0	0.0392782
NC_006091.4	74793474	74793964	NC_006091.4.4.255742	0.2714	0.23724	2.48563	18.0701	0	0.00179387
NC_006091.4	74796028	74796517	NC_006091.4.4.255748	0.36115	0.32793	2.07173	13.2348	0	0.0151455
NC_006091.4	74842092	74842337	NC_006091.4.4.255976	0.35329	0.29941	2.8629	16.0866	0	0.00344405
NC_006091.4	75248072	75248189	NC_006091.4.4.257227	0.49821	0.41143	3.1282	13.5046	0	0.0127473
NC_006091.4	75484245	75484700	NC_006091.4.4.257815	0.24269	0.20553	2.87147	21.0518	0	0
NC_006091.4	75484715	75484979	NC_006091.4.4.257816	0.3727	0.32745	2.40889	12.3927	0	0.0236919
NC_006091.4	75887570	75887674	NC_006091.4.4.259226	0.42476	0.34211	3.50344	12.2294	0	0.0236919
NC_006091.4	75954833	75955005	NC_006091.4.4.259411	0.38426	0.3169	3.15027	15.6719	0	0.00478024
NC_006091.4	76051670	76051821	NC_006091.4.4.259742	0.39134	0.3223	3.22334	14.2261	0	0.0104502
NC_006091.4	76061154	76061268	NC_006091.4.4.259776	0.34113	0.27457	3.48779	11.276	0	0.0385402
NC_006091.4	76098316	76098480	NC_006091.4.4.259875	0.25545	0.20395	3.61821	13.274	0	0.0151455
NC_006091.4	77790810	77790970	NC_006091.4.4.267169	0.43237	0.36717	2.79316	12.072	0	0.0236919
NC_006091.4	78107284	78107659	NC_006091.4.4.268715	0.28283	0.24681	2.50551	14.4966	0	0.00873001
NC_006091.4	78152027	78152185	NC_006091.4.4.268963	0.40868	0.34205	3.02968	13.8699	0	0.0125126
NC_006091.4	78282776	78282953	NC_006091.4.4.269556	0.38049	0.3251	2.7363	12.0278	0	0.0236919
NC_006091.4	78284347	78284464	NC_006091.4.4.269567	0.46334	0.37374	3.47393	15.6494	0	0.00478024
NC_006091.4	78468941	78469062	NC_006091.4.4.270305	0.42139	0.34277	3.17871	11.794	0	0.0285898
NC_006091.4	78515851	78515984	NC_006091.4.4.270485	0.29511	0.23979	3.42902	11.1021	0	0.0425072
NC_006091.4	80198148	80198344	NC_006091.4.4.276394	0.31623	0.26144	3.16274	15.4666	0	0.00552615
NC_006091.4	81842395	81842537	NC_006091.4.4.282887	0.34863	0.28795	3.18562	12.024	0	0.0236919
NC_006091.4	81882491	81882713	NC_006091.4.4.283061	0.26785	0.22425	3.00375	12.8286	0	0.0205848
NC_006091.4	82021031	82021180	NC_006091.4.4.283552	0.31352	0.25614	3.30527	12.6372	0	0.0215888
NC_006091.4	82029135	82029384	NC_006091.4.4.283572	0.19094	0.15764	3.15651	11.8945	0	0.0243989
NC_006091.4	82060716	82060824	NC_006091.4.4.283631	0.43164	0.35312	3.29879	12.1424	0	0.0236919
NC_006091.4	82149422	82149624	NC_006091.4.4.283900	0.34559	0.29706	2.67772	10.8615	0	0.0498067
NC_006091.4	82483742	82484058	NC_006091.4.4.284888	0.31462	0.27724	2.40753	12.4427	0	0.0234278
NC_006091.4	84289306	84289579	NC_006091.4.4.292383	0.29412	0.25334	2.65356	12.7062	0	0.0207695
NC_006091.4	84673877	84674184	NC_006091.4.4.294094	0.28683	0.24637	2.68874	14.8552	0	0.00679681
NC_006091.4	84926863	84927238	NC_006091.4.4.295215	0.17243	0.14975	4.92804	17.6607	0	0.00179387
NC_006091.4	84960474	84960584	NC_006091.4.4.295335	0.37684	0.2649	4.91839	20.7355	0	0
NC_006091.4	85429771	85429961	NC_006091.4.4.297182	0.31755	0.26251	3.16428	14.702	0	0.00783237
NC_006091.4	85494897	85495028	NC_006091.4.4.297451	0.42157	0.33859	3.55912	16.1911	0	0.00344405
NC_006091.4	85628159	85628427	NC_006091.4.4.298096	0.17408	0.14233	3.35681	13.0282	0	0.0195239
NC_006091.4	85707393	85707592	NC_006091.4.4.298631	0.45503	0.3871	2.76637	16.0843	0	0.00344405
NC_006091.4	85736889	85737012	NC_006091.4.4.298846	0.30419	0.23184	4.20557	15.097	0	0.00552615
NC_006091.4	86778705	86778859	NC_006091.4.4.302694	0.4852	0.41315	2.65122	11.5625	0	0.0313782
NC_006091.4	86938315	86938418	NC_006091.4.4.303235	0.45227	0.3406	4.13322	17.7901	0	0.00179387
NC_006091.4	90249225	90249356	NC_006091.4.4.313849	0.33612	0.25005	4.91451	21.0315	0	0
NC_006092.4	605444	605585	NC_006092.4.4.2466	0.4604	0.38883	2.76306	11.141	0	0.0413656
NC_006092.4	1720959	1721092	NC_006092.4.4.5664	0.39697	0.32941	3.14199	12.1369	0	0.0236919
NC_006092.4	1756255	1756364	NC_006092.4.4.5757	0.37178	0.28388	4.29206	17.2496	0	0.00179387
NC_006092.4	1899104	1899336	NC_006092.4.4.6310	0.2754	0.22117	3.542	19.6499	0	0
NC_006092.4	2009592	2010328	NC_006092.4.4.6860	0.10264	0.08871	2.58192	10.9902	0	0.0452869
NC_006092.4	2031809	2032245	NC_006092.4.4.6934	0.10538	0.08197	3.93705	17.33	0	0.00179387
NC_006092.4	2623935	2624059	NC_006092.4.4.8835	0.37427	0.28592	4.80562	20.9974	0	0
NC_006092.4	2837013	2837276	NC_006092.4.4.9429	0.23444	0.18102	4.04497	23.7208	0	0
NC_006092.4	2875533	2875847	NC_006092.4.4.9571	0.20197	0.16196	3.7938	20.8785	0	0
NC_006092.4	2925736	2925975	NC_006092.4.4.9734	0.22495	0.18782	3.00702	11.8066	0	0.0278711
NC_006092.4	2954875	2955244	NC_006092.4.4.9812	0.30634	0.27424	2.20397	11.0042	0	0.0452869
NC_006092.4	4561526	4561709	NC_006092.4.4.13875	0.30559	0.22573	5.47379	31.2118	0	0
NC_006092.4	4638112	4638345	NC_006092.4.4.14232	0.40824	0.35918	2.40735	11.1201	0	0.0413656
NC_006092.4	4776657	4776836	NC_006092.4.4.14804	0.35182	0.29035	3.17147	15.4936	0	0.00552615
NC_006092.4	4938841	4939192	NC_006092.4.4.15116	0.16076	0.13711	2.91824	11.1075	0	0.0425072
NC_006092.4	5078519	5078808	NC_006092.4.4.15484	0.16853	0.1363	3.43911	14.2312	0	0.0104502
NC_006092.4	5123379	5123804	NC_006092.4.4.15644	0.09166	0.06963	4.28344	17.2896	0	0.00179387
NC_006092.4	5230499	5230905	NC_006092.4.4.16097	0.11217	0.09048	3.82481	15.0442	0	0.00552615
NC_006092.4	5296877	5297043	NC_006092.4.4.16447	0.27916	0.21984	3.84291	16.3232	0	0.00179387
NC_006092.4	5302467	5303570	NC_006092.4.4.16491	0.09129	0.07989	2.4653	13.8709	0	0.0125126
NC_006092.4	5387169	5387298	NC_006092.4.4.16880	0.5041	0.42359	2.98191	12.8056	0	0.0207695
NC_006092.4	5495169	5495391	NC_006092.4.4.17357	0.42249	0.35102	3.13626	20.6703	0	0
NC_006092.4	5579240	5579542	NC_006092.4.4.17712	0.19345	0.1555	3.52675	17.946	0	0.00179387
NC_006092.4	6724653	6724755	NC_006092.4.4.18978	0.43508	0.36271	3.5138	11.199	0	0.0398974
NC_006092.4	7123002	7123193	NC_006092.4.4.20385	0.32217	0.25671	3.62364	19.4009	0	0
NC_006092.4	7901552	7901753	NC_006092.4.4.23524	0.15968	0.11996	4.42042	14.8375	0	0.00679681
NC_006092.4	8380539	8380664	NC_006092.4.4.25241	0.47833	0.39835	3.00825	11.3248	0	0.038181
NC_006092.4	9385219	9385401	NC_006092.4.4.28167	0.23401	0.1868	3.90571	14.2399	0	0.00990204
NC_006092.4	9867033	9867144	NC_006092.4.4.30300	0.41528	0.33176	3.99122	15.6485	0	0.00478024
NC_006092.4	9876020	9876123	NC_006092.4.4.30327	0.46432	0.38558	3.10152	11.1328	0	0.0413656
NC_006092.4	10168577	10169010	NC_006092.4.4.31981	0.10058	0.08116	3.60655	13.3885	0	0.0144011
NC_006092.4	10501328	10501565	NC_006092.4.4.33167	0.34359	0.29274	2.79774	14.1961	0	0.0104502
NC_006092.4	10621511	10621655	NC_006092.4.4.33582	0.41518	0.35271	2.81557	11.2719	0	0.0385402
NC_006092.4	10747529	10747733	NC_006092.4.4.34087	0.41771	0.36354	2.60921	11.7858	0	0.0292977
NC_006092.4	10757266	10757474	NC_006092.4.4.34119	0.21282	0.17426	3.27669	11.4511	0	0.0314832
NC_006092.4	10764839	10765047	NC_006092.4.4.34153	0.21282	0.17426	3.27669	11.4511	0	0.0314832
NC_006092.4	10779466	10780209	NC_006092.4.4.34203	0.13514	0.11277	3.09886	22.9548	0	0
NC_006092.4	10850485	10850956	NC_006092.4.4.34464	0.19779	0.16887	2.78294	16.6519	0	0.00179387
NC_006092.4	10879311	10879470	NC_006092.4.4.34529	0.31056	0.25064	3.46656	13.9015	0	0.0125126
NC_006092.4	10972907	10973011	NC_006092.4.4.34803	0.34967	0.27807	3.75826	11.4394	0	0.0314832
NC_006092.4	11029005	11029213	NC_006092.4.4.35059	0.25876	0.2173	3.25715	10.9624	0	0.0464089
NC_006092.4	11040067	11040173	NC_006092.4.4.35110	0.27916	0.19284	5.49592	18.6691	0	0
NC_006092.4	11155054	11155256	NC_006092.4.4.35675	0.32858	0.27911	2.80304	12.4462	0	0.0234278
NC_006092.4	11174360	11174760	NC_006092.4.4.35806	0.1884	0.16398	2.59811	11.1855	0	0.0404367
NC_006092.4	11187254	11187563	NC_006092.4.4.35872	0.28795	0.24852	2.62932	14.008	0	0.0104502
NC_006092.4	11190251	11190938	NC_006092.4.4.35892	0.24682	0.2213	2.1473	15.1118	0	0.00552615
NC_006092.4	11197086	11197332	NC_006092.4.4.35939	0.21101	0.17461	3.38442	13.2917	0	0.0151455
NC_006092.4	11212585	11212702	NC_006092.4.4.36026	0.33851	0.27248	4.02302	13.1824	0	0.0177263
NC_006092.4	11236943	11237201	NC_006092.4.4.36167	0.42602	0.36197	2.82044	20.2886	0	0
NC_006092.4	11240100	11240597	NC_006092.4.4.36183	0.31679	0.28767	2.03119	11.178	0	0.0410809
NC_006092.4	11250288	11250569	NC_006092.4.4.36229	0.27624	0.21859	3.73183	26.0493	0	0
NC_006092.4	11267502	11268147	NC_006092.4.4.36304	0.27373	0.24796	2.18857	14.5279	0	0.00873001
NC_006092.4	11279838	11280119	NC_006092.4.4.36342	0.27624	0.21859	3.73183	26.0493	0	0
NC_006092.4	11295291	11295919	NC_006092.4.4.36415	0.26562	0.23857	2.29809	16.3789	0	0.00179387
NC_006092.4	11348734	11349017	NC_006092.4.4.36678	0.17281	0.14311	3.23995	11.2016	0	0.0392782
NC_006092.4	11374105	11374476	NC_006092.4.4.36797	0.32929	0.2925	2.32579	13.5247	0	0.0127473
NC_006092.4	11433594	11434503	NC_006092.4.4.37090	0.08006	0.06939	2.57467	11.0624	0	0.044216
NC_006092.4	11481376	11481985	NC_006092.4.4.37322	0.11042	0.09391	2.80943	12.7057	0	0.0207695
NC_006092.4	12654386	12654577	NC_006092.4.4.41883	0.33188	0.28429	2.89531	11.2849	0	0.0385402
NC_006092.4	13350151	13350361	NC_006092.4.4.44993	0.36026	0.30191	2.98831	15.7361	0	0.00478024
NC_006092.4	14565282	14565416	NC_006092.4.4.51269	0.37248	0.30837	3.15841	11.8706	0	0.0265878
NC_006092.4	17158724	17158848	NC_006092.4.4.58966	0.21805	0.16486	4.35152	11.6595	0	0.0305082
NC_006092.4	17169140	17169462	NC_006092.4.4.59047	0.10749	0.08415	3.84982	12.6032	0	0.0223803
NC_006092.4	17261013	17261343	NC_006092.4.4.59455	0.22878	0.19728	2.64247	12.3444	0	0.0236919
NC_006092.4	17287257	17287732	NC_006092.4.4.59576	0.24251	0.21409	2.3759	14.0987	0	0.0104502
NC_006092.4	17308777	17309147	NC_006092.4.4.59674	0.32455	0.27808	2.82004	21.4374	0	0
NC_006092.4	17326159	17326464	NC_006092.4.4.59781	0.19551	0.1585	3.38447	16.5498	0	0.00179387
NC_006092.4	17345679	17345915	NC_006092.4.4.59877	0.37989	0.32965	2.60295	11.4317	0	0.0335011
NC_006092.4	17372205	17372378	NC_006092.4.4.60002	0.25309	0.19031	4.37397	19.193	0	0
NC_006092.4	17373079	17373916	NC_006092.4.4.60009	0.14639	0.13163	2.14797	11.4177	0	0.0335011
NC_006092.4	17378044	17378246	NC_006092.4.4.60026	0.27019	0.22624	2.98587	11.7321	0	0.0302473
NC_006092.4	17401039	17401471	NC_006092.4.4.60168	0.17962	0.13647	4.27781	34.4391	0	0
NC_006092.4	17437628	17438016	NC_006092.4.4.60409	0.22487	0.19218	2.74566	15.402	0	0.00552615
NC_006092.4	17440982	17441267	NC_006092.4.4.60424	0.2756	0.24018	2.50897	11.2194	0	0.0392782
NC_006092.4	17447458	17447680	NC_006092.4.4.60454	0.22168	0.17821	3.59544	15.6089	0	0.00552615
NC_006092.4	17448664	17449314	NC_006092.4.4.60463	0.14031	0.11883	2.91763	18.5065	0	0
NC_006092.4	17464408	17464547	NC_006092.4.4.60567	0.21838	0.14953	5.89372	21.5864	0	0
NC_006092.4	17503261	17503530	NC_006092.4.4.60808	0.24342	0.20505	2.95424	13.3525	0	0.0144011
NC_006092.4	17574071	17574587	NC_006092.4.4.61189	0.20135	0.16225	3.47688	31.0986	0	0
NC_006092.4	17623694	17623843	NC_006092.4.4.61444	0.33649	0.26846	3.64076	15.6775	0	0.00478024
NC_006092.4	17632935	17633509	NC_006092.4.4.61502	0.10511	0.08567	3.339	16.7631	0	0.00179387
NC_006092.4	17639605	17639889	NC_006092.4.4.61516	0.23264	0.19467	3.01136	13.7188	0	0.0127473
NC_006092.4	17651345	17651817	NC_006092.4.4.61559	0.1905	0.16614	2.49371	12.7575	0	0.0207695
NC_006092.4	17658878	17659730	NC_006092.4.4.61597	0.19503	0.1748	2.18798	16.2909	0	0.00344405
NC_006092.4	17663170	17663650	NC_006092.4.4.61609	0.33749	0.28874	2.87048	30.1638	0	0
NC_006092.4	17675769	17676008	NC_006092.4.4.61655	0.25027	0.20017	3.58927	18.4983	0	0
NC_006092.4	17677985	17678215	NC_006092.4.4.61671	0.31245	0.2563	3.27382	18.7477	0	0
NC_006092.4	17702545	17702836	NC_006092.4.4.61777	0.24388	0.20777	2.78596	13.1173	0	0.0177263
NC_006092.4	17708336	17708545	NC_006092.4.4.61807	0.25618	0.19949	3.96115	20.0425	0	0
NC_006092.4	19536338	19536440	NC_006092.4.4.68277	0.33975	0.26417	4.01753	13.3745	0	0.0144011
NC_006092.4	19552034	19552309	NC_006092.4.4.68326	0.35158	0.31196	2.37585	11.1754	0	0.0413656
NC_006092.4	19552313	19552428	NC_006092.4.4.68327	0.39154	0.30166	4.1664	18.3604	0	0.00179387
NC_006092.4	19569309	19569600	NC_006092.4.4.68418	0.38679	0.33582	2.60966	16.5574	0	0.00179387
NC_006092.4	19578673	19578800	NC_006092.4.4.68448	0.48606	0.39082	3.54598	18.3374	0	0.00179387
NC_006092.4	19579062	19579221	NC_006092.4.4.68451	0.46013	0.36834	3.69481	23.3249	0	0
NC_006092.4	19580127	19580246	NC_006092.4.4.68454	0.49442	0.41772	2.90825	11.5238	0	0.0314832
NC_006092.4	20156283	20156442	NC_006092.4.4.69608	0.40269	0.32819	3.62255	16.3141	0	0.00179387
NC_006092.4	20430176	20430309	NC_006092.4.4.69936	0.37664	0.29804	3.39659	12.7655	0	0.0207695
NC_006092.4	20510219	20510355	NC_006092.4.4.70112	0.46918	0.39974	3.04354	11.3926	0	0.0361678
NC_006092.4	20518065	20518204	NC_006092.4.4.70148	0.32398	0.26391	3.39233	12.6812	0	0.0207695
NC_006092.4	20565615	20565735	NC_006092.4.4.70298	0.27133	0.20716	4.20354	14.0376	0	0.0104502
NC_006092.4	21245367	21245624	NC_006092.4.4.71672	0.3288	0.28732	2.49929	11.7061	0	0.0302473
NC_006092.4	21352375	21352625	NC_006092.4.4.72061	0.36327	0.31603	2.41431	11.2891	0	0.0385402
NC_006092.4	22063208	22063422	NC_006092.4.4.75047	0.38359	0.33168	2.57795	12.2852	0	0.0236919
NC_006092.4	23986532	23986746	NC_006092.4.4.83920	0.26011	0.22021	2.8816	11.0958	0	0.0425072
NC_006092.4	26504454	26504697	NC_006092.4.4.95140	0.33109	0.27731	3.0008	16.8854	0	0.00179387
NC_006092.4	27482027	27482184	NC_006092.4.4.99358	0.36282	0.30707	2.87293	11.3345	0	0.038181
NC_006092.4	29141576	29141846	NC_006092.4.4.107512	0.29935	0.25998	2.4836	10.918	0	0.0472945
NC_006092.4	30464088	30464234	NC_006092.4.4.111234	0.32258	0.26629	3.57809	12.8825	0	0.0205848
NC_006092.4	31112287	31112480	NC_006092.4.4.113436	0.32244	0.25723	3.70775	20.0743	0	0
NC_006092.4	31142858	31142997	NC_006092.4.4.113563	0.38072	0.30955	3.37385	14.6939	0	0.00783237
NC_006092.4	31171314	31171623	NC_006092.4.4.113700	0.17774	0.14226	3.57867	17.3463	0	0.00179387
NC_006092.4	31187011	31187185	NC_006092.4.4.113758	0.23386	0.18229	3.99143	15.4757	0	0.00552615
NC_006092.4	31354926	31355205	NC_006092.4.4.114767	0.30747	0.26756	2.54664	12.6789	0	0.0207695
NC_006092.4	31382894	31383062	NC_006092.4.4.114945	0.29187	0.24581	3.27532	11.0462	0	0.0451944
NC_006092.4	31500665	31500888	NC_006092.4.4.115561	0.21476	0.17678	3.2069	12.0634	0	0.0236919
NC_006092.4	31600509	31601085	NC_006092.4.4.115969	0.24322	0.21882	2.1483	12.41	0	0.0234278
NC_006092.4	31763089	31763311	NC_006092.4.4.116547	0.3476	0.28278	3.371	21.1358	0	0
NC_006092.4	31801154	31801523	NC_006092.4.4.116635	0.23386	0.20225	2.61865	13.6881	0	0.0127473
NC_006092.4	31890128	31890258	NC_006092.4.4.116922	0.44551	0.36328	3.20327	13.1398	0	0.0177263
NC_006092.4	32085042	32085207	NC_006092.4.4.117545	0.25806	0.20609	3.58687	14.0443	0	0.0104502
NC_006092.4	32179868	32180082	NC_006092.4.4.117943	0.18979	0.13264	5.47634	25.9671	0	0
NC_006092.4	33288613	33288737	NC_006092.4.4.120331	0.41811	0.32355	3.90775	17.9553	0	0.00179387
NC_006092.4	33499464	33499644	NC_006092.4.4.120850	0.40393	0.34818	2.62737	11.2481	0	0.0392782
NC_006092.4	33518631	33519004	NC_006092.4.4.120932	0.32176	0.28289	2.40908	14.7735	0	0.00783237
NC_006092.4	33720104	33720889	NC_006092.4.4.121630	0.15294	0.13475	2.38654	14.7666	0	0.00783237
NC_006092.4	33748593	33748702	NC_006092.4.4.121738	0.25592	0.19117	4.53658	12.7803	0	0.0207695
NC_006092.4	33767217	33767639	NC_006092.4.4.121799	0.28232	0.2518	2.2577	12.0454	0	0.0236919
NC_006092.4	35195832	35196006	NC_006092.4.4.126654	0.31873	0.25511	3.55144	17.074	0	0.00179387
NC_006092.4	35225553	35225845	NC_006092.4.4.126739	0.14029	0.10889	4.00482	16.0748	0	0.00344405
NC_006092.4	35585641	35585846	NC_006092.4.4.128375	0.28538	0.23173	3.34702	15.398	0	0.00552615
NC_006092.4	36480143	36480703	NC_006092.4.4.132192	0.23945	0.21087	2.3997	16.332	0	0.00179387
NC_006092.4	36482504	36482842	NC_006092.4.4.132205	0.23355	0.20494	2.81115	12.0349	0	0.0236919
NC_006092.4	36510028	36510226	NC_006092.4.4.132280	0.33623	0.28477	2.87073	12.3034	0	0.0236919
NC_006092.4	36592681	36592835	NC_006092.4.4.132597	0.39498	0.33486	2.81536	10.9477	0	0.0472945
NC_006092.4	36814827	36815075	NC_006092.4.4.133486	0.36269	0.31829	2.42739	11.3065	0	0.038181
NC_006092.4	37433522	37433651	NC_006092.4.4.135779	0.43683	0.36365	2.94566	11.5586	0	0.0313782
NC_006092.4	38140863	38140999	NC_006092.4.4.138942	0.28997	0.22895	3.82272	13.9331	0	0.0125126
NC_006092.4	38387520	38387672	NC_006092.4.4.140351	0.51829	0.43063	2.94071	14.963	0	0.00552615
NC_006092.4	38737277	38737461	NC_006092.4.4.142349	0.27607	0.23172	2.98816	11.3251	0	0.038181
NC_006092.4	40056063	40056214	NC_006092.4.4.149041	0.28795	0.2146	4.78234	21.3167	0	0
NC_006092.4	40079824	40080052	NC_006092.4.4.149172	0.30518	0.25428	3.11471	16.3739	0	0.00179387
NC_006092.4	40162381	40162774	NC_006092.4.4.149602	0.33988	0.30373	2.22454	13.1518	0	0.0177263
NC_006092.4	40524800	40524953	NC_006092.4.4.151071	0.45407	0.38051	2.99812	14.583	0	0.00783237
NC_006092.4	41470218	41470469	NC_006092.4.4.154241	0.42045	0.36574	2.55351	14.1021	0	0.0104502
NC_006092.4	41535522	41535696	NC_006092.4.4.154416	0.39444	0.33505	2.72396	11.8824	0	0.0265878
NC_006092.4	41642745	41642923	NC_006092.4.4.154608	0.17972	0.14047	3.87535	11.3228	0	0.038181
NC_006092.4	41662736	41662836	NC_006092.4.4.154636	0.4975	0.39876	3.51578	14.0232	0	0.0104502
NC_006092.4	41730772	41730913	NC_006092.4.4.154815	0.48895	0.38218	3.8129	22.9434	0	0
NC_006092.4	41826118	41826367	NC_006092.4.4.155018	0.33897	0.28323	3.03046	18.2421	0	0.00179387
NC_006092.4	41866701	41866953	NC_006092.4.4.155113	0.30035	0.26127	2.53591	10.8929	0	0.0482527
NC_006092.4	42018277	42018443	NC_006092.4.4.155432	0.34871	0.29063	3.04076	12.7215	0	0.0207695
NC_006092.4	42189053	42189302	NC_006092.4.4.155912	0.38372	0.33729	2.40782	11.888	0	0.0259365
NC_006092.4	42817737	42817862	NC_006092.4.4.157532	0.40188	0.32131	3.58158	14.8956	0	0.00552615
NC_006092.4	43400473	43400617	NC_006092.4.4.159638	0.37446	0.30931	3.18086	13.1555	0	0.0177263
NC_006092.4	43508752	43508863	NC_006092.4.4.160204	0.39522	0.32423	3.2591	11.0963	0	0.0425072
NC_006092.4	43646985	43647299	NC_006092.4.4.160911	0.26652	0.22643	2.9542	16.3624	0	0.00179387
NC_006092.4	43991863	43992001	NC_006092.4.4.162326	0.46301	0.39508	2.75777	11.1988	0	0.0398974
NC_006092.4	44185717	44186055	NC_006092.4.4.162933	0.16103	0.12992	4.04707	17.479	0	0.00179387
NC_006092.4	44566059	44566170	NC_006092.4.4.164485	0.41978	0.34678	3.16398	11.4399	0	0.0314832
NC_006092.4	44924573	44924712	NC_006092.4.4.165965	0.38647	0.32367	2.99438	11.3415	0	0.037863
NC_006092.4	44939286	44939425	NC_006092.4.4.166011	0.38647	0.32367	2.99438	11.3415	0	0.037863
NC_006092.4	45348703	45348921	NC_006092.4.4.167707	0.36423	0.3053	3.00237	16.5509	0	0.00179387
NC_006092.4	45395134	45395421	NC_006092.4.4.167974	0.24204	0.20874	2.64824	10.9935	0	0.0452869
NC_006092.4	45849468	45849694	NC_006092.4.4.169768	0.18878	0.15185	3.7972	13.8064	0	0.0127473
NC_006092.4	45862658	45862841	NC_006092.4.4.169841	0.44226	0.37023	3.27985	18.1644	0	0.00179387
NC_006092.4	45903415	45903601	NC_006092.4.4.170066	0.30387	0.24775	3.27848	13.6992	0	0.0127473
NC_006092.4	46637065	46637399	NC_006092.4.4.172673	0.18173	0.15336	3.008	12.6952	0	0.0207695
NC_006092.4	46681929	46682036	NC_006092.4.4.172905	0.42438	0.34811	3.32555	11.4784	0	0.0314832
NC_006092.4	46748351	46748727	NC_006092.4.4.173211	0.20916	0.18352	2.72391	11.6926	0	0.0302473
NC_006092.4	46833358	46833988	NC_006092.4.4.173677	0.09672	0.08175	2.88267	12.1891	0	0.0236919
NC_006092.4	46913170	46913414	NC_006092.4.4.174132	0.2701	0.22057	3.36558	17.7754	0	0.00179387
NC_006092.4	46922740	46923383	NC_006092.4.4.174172	0.23972	0.21768	2.03709	11.8181	0	0.0278711
NC_006092.4	46998153	46998442	NC_006092.4.4.174554	0.26882	0.22869	2.80512	14.9091	0	0.00552615
NC_006092.4	47160478	47160969	NC_006092.4.4.175301	0.27778	0.24718	2.26233	14.5305	0	0.00873001
NC_006092.4	47180101	47180321	NC_006092.4.4.175394	0.39291	0.34231	2.51006	12.3022	0	0.0236919
NC_006092.4	47184255	47184583	NC_006092.4.4.175415	0.30514	0.24075	3.80356	35.2169	0	0
NC_006092.4	47197586	47197962	NC_006092.4.4.175472	0.13711	0.11041	3.57631	15.9773	0	0.00478024
NC_006092.4	47206398	47206797	NC_006092.4.4.175509	0.26526	0.2346	2.33312	12.0854	0	0.0236919
NC_006092.4	47211695	47212192	NC_006092.4.4.175546	0.28646	0.22821	3.71087	48.03	0	0
NC_006092.4	47300489	47300846	NC_006092.4.4.175996	0.34674	0.29257	2.83242	22.3766	0	0
NC_006092.4	47338452	47338578	NC_006092.4.4.176209	0.398	0.32913	3.19051	11.6504	0	0.0305082
NC_006092.4	47338580	47338862	NC_006092.4.4.176210	0.19486	0.15541	3.63789	17.6794	0	0.00179387
NC_006092.4	47347335	47347560	NC_006092.4.4.176254	0.24956	0.20513	3.22798	13.9727	0	0.0104502
NC_006092.4	47407710	47408024	NC_006092.4.4.176592	0.43466	0.38322	2.36414	15.8218	0	0.00478024
NC_006092.4	47458562	47458704	NC_006092.4.4.176856	0.19304	0.14297	5.33989	15.3106	0	0.00552615
NC_006092.4	47460730	47461088	NC_006092.4.4.176875	0.43423	0.37495	2.60432	22.5522	0	0
NC_006092.4	47474389	47474781	NC_006092.4.4.176962	0.15517	0.13051	2.94425	12.8881	0	0.0205848
NC_006092.4	47481686	47481949	NC_006092.4.4.177015	0.26647	0.22491	2.8999	13.9819	0	0.0104502
NC_006092.4	47482840	47483102	NC_006092.4.4.177027	0.39006	0.34099	2.47183	13.7987	0	0.0127473
NC_006092.4	47487566	47487746	NC_006092.4.4.177057	0.26071	0.21606	3.13986	11.4126	0	0.0348822
NC_006092.4	47487804	47488010	NC_006092.4.4.177059	0.30147	0.24358	3.63029	18.7336	0	0
NC_006092.4	47492866	47493681	NC_006092.4.4.177076	0.27559	0.25039	2.02867	16.9005	0	0.00179387
NC_006092.4	47508499	47508641	NC_006092.4.4.177135	0.44329	0.38027	2.99184	11.8806	0	0.0265878
NC_006092.4	47508659	47508839	NC_006092.4.4.177136	0.21204	0.16564	4.00814	14.5171	0	0.00873001
NC_006092.4	47510082	47510517	NC_006092.4.4.177148	0.30841	0.25864	2.9431	27.4262	0	0
NC_006092.4	47527226	47527590	NC_006092.4.4.177234	0.32889	0.28499	2.67303	18.4748	0	0
NC_006092.4	47534782	47535163	NC_006092.4.4.177280	0.19694	0.16568	2.94805	16.126	0	0.00344405
NC_006092.4	47545354	47545646	NC_006092.4.4.177331	0.42167	0.37208	2.49734	15.5947	0	0.00552615
NC_006092.4	47605490	47605700	NC_006092.4.4.177674	0.29227	0.24074	3.19807	15.3137	0	0.00552615
NC_006092.4	47649100	47649208	NC_006092.4.4.177894	0.22467	0.16536	4.73401	12.053	0	0.0236919
NC_006092.4	47712230	47712370	NC_006092.4.4.178222	0.41059	0.33967	3.17543	13.956	0	0.0104502
NC_006092.4	47712737	47712989	NC_006092.4.4.178230	0.21291	0.16853	3.73109	18.7217	0	0
NC_006092.4	47739648	47739953	NC_006092.4.4.178362	0.24184	0.19264	3.65226	24.4676	0	0
NC_006092.4	47750231	47750405	NC_006092.4.4.178409	0.39371	0.32286	3.25345	16.8698	0	0.00179387
NC_006092.4	47768031	47768191	NC_006092.4.4.178483	0.46626	0.40351	2.58773	10.9498	0	0.0472945
NC_006092.4	47771700	47771914	NC_006092.4.4.178501	0.42849	0.36365	2.8599	17.0613	0	0.00179387
NC_006092.4	47777853	47778113	NC_006092.4.4.178529	0.24234	0.18496	4.27549	27.5238	0	0
NC_006092.4	47794780	47794905	NC_006092.4.4.178600	0.36507	0.28824	3.82794	15.1694	0	0.00552615
NC_006092.4	47840680	47841092	NC_006092.4.4.178917	0.10804	0.08861	3.25031	11.5986	0	0.0310047
NC_006092.4	47908806	47909268	NC_006092.4.4.179413	0.12074	0.10213	2.89051	11.296	0	0.0385402
NC_006092.4	47944469	47944594	NC_006092.4.4.179736	0.23511	0.17272	4.84109	14.9104	0	0.00552615
NC_006092.4	47949087	47949224	NC_006092.4.4.179780	0.30411	0.23545	3.97384	15.7957	0	0.00478024
NC_006092.4	48109755	48109955	NC_006092.4.4.180662	0.39805	0.34639	2.55318	12.4287	0	0.0234278
NC_006092.4	48462143	48462300	NC_006092.4.4.182596	0.41533	0.35613	2.78593	11.1056	0	0.0425072
NC_006092.4	48494094	48494344	NC_006092.4.4.182759	0.37357	0.32571	2.5078	13.1117	0	0.0177263
NC_006092.4	48865932	48866048	NC_006092.4.4.184159	0.53214	0.43889	3.17083	14.59	0	0.00783237
NC_006092.4	48878183	48878451	NC_006092.4.4.184200	0.27994	0.24227	2.60148	11.6869	0	0.0305082
NC_006092.4	48917045	48917292	NC_006092.4.4.184361	0.35287	0.31094	2.41981	11.0287	0	0.0452869
NC_006092.4	49053135	49053334	NC_006092.4.4.184811	0.31915	0.26439	3.18676	15.2888	0	0.00552615
NC_006092.4	49128725	49128917	NC_006092.4.4.185113	0.25565	0.21457	3.12283	11.0362	0	0.0451944
NC_006092.4	49314559	49314747	NC_006092.4.4.186228	0.33156	0.28314	2.82432	11.1138	0	0.0419827
NC_006092.4	49377357	49377766	NC_006092.4.4.186731	0.1747	0.15149	2.6717	12.3609	0	0.0236919
NC_006092.4	49386990	49387137	NC_006092.4.4.186771	0.47563	0.40048	2.97582	13.7276	0	0.0127473
NC_006092.4	49668241	49668430	NC_006092.4.4.187773	0.30902	0.25804	3.03857	12.3373	0	0.0236919
NC_006092.4	50105489	50105671	NC_006092.4.4.190114	0.3115	0.26242	2.94643	11.4687	0	0.0314832
NC_006092.4	50140351	50140511	NC_006092.4.4.190340	0.36935	0.30049	3.34833	16.2468	0	0.00344405
NC_006092.4	50386315	50386440	NC_006092.4.4.191530	0.32412	0.25629	3.72275	13.2136	0	0.0151455
NC_006092.4	50386450	50386596	NC_006092.4.4.191531	0.30635	0.23365	4.58979	19.9552	0	0
NC_006092.4	50406344	50406666	NC_006092.4.4.191645	0.20184	0.1631	3.46509	19.3222	0	0
NC_006092.4	50837274	50837481	NC_006092.4.4.193716	0.3983	0.34076	2.80742	14.3135	0	0.00873001
NC_006092.4	50881885	50882300	NC_006092.4.4.194019	0.22205	0.1958	2.37562	11.3825	0	0.0367743
NC_006092.4	50926237	50926381	NC_006092.4.4.194210	0.43585	0.35692	3.28582	16.6689	0	0.00179387
[truncated: 1,552 more rows]

## Sheet: Hummingbird
Chicken Chromosome	Start	End	Unique ID	Null Scale (neutral)	Alt Scale (accelerated)	Alt Subscale (Degree of Acceleration)	lnl-Ratio (Significance)	p-value	FDR q-value
[truncated: 1,795 more rows]

[truncated: 28 more sheets: Mallard, Core Waterbirds, Killdeer, American Flamingo, Oscine Branch, Parrot Branch, Manakins, Blue Crowned Manakin, Golden Collared Manakin, Rifleman, Peregrine Falcon, Red Legged Seriema, Downy Woodpecker, Golden Eagle, Crested Ibis, Emperor Penguin, Killdeer_NVL, Hoatzin, Chimney Swift, Chuck Will's Widow …]
