# Supplementary material for: Positive selection in noncoding genomic regions of vocal learning birds is associated with genes implicated in vocal learning and speech functions in humans
Source: HighWire-hosted journal article supplement (doi:10.1101/gr.275989.121), 2021-10-19
Supplement: Supplemental_Table_S4.xlsx [file Supplemental_Table_S4.xlsx]

## Sheet: Legend
Supplemental Table S4: The number of ARs and conserved elements associated with each annotated gene in the chicken reference genome. Significant enrichment for AR associations are calculated using a hypergeometric test. ARCHS4 scores for coexpression with vocalization behavior GO term genes are shown for each gene.

## Sheet: VL Convergent
Gene	Chromosome	Start	End	Strand	AR	CE	Q-score	Exonic AR	Noncoding AR	Exonic CE	Noncoding CE	Hypergeometric	ARCHS Vocalization Behavior Rank	ARCHS Vocalization Behavior Z-Score
NR2F1	NC_006127.4	58374141	58383484	-	23	422	0	0	23	3	419	3.33121e-08	1	5.831
ARRDC3	NC_006127.4	59332514	59346072	+	23	438	0	0	23	6	432	6.51975e-08	172	2.59514
MAT2B	NC_006100.4	6704768	6715540	-	10	279	0	0	10	5	274	0.00548645	>200	0
ACYP1	NC_006092.4	38195151	38196110	-	1	1	0.0009	0	1	0	1	0.0136467	>200	0
C8ORF88	NC_006089.4	125261733	125269199	-	1	3	0.0021	0	1	1	2	0.040384	>200	0
NOL7	NC_006089.4	60720088	60723535	+	1	3	0.0021	0	1	0	3	0.040384	>200	0
HABP4	NC_006127.4	42179846	42201841	+	1	4	0.0038	1	0	1	3	0.0534797	11	4.12441
C1H11ORF70	NC_006088.4	182765820	182785257	-	1	6	0.0044	0	1	1	5	0.0791376	>200	0
UBIAD1	NC_006108.4	4191071	4197036	+	1	6	0.0044	0	1	3	3	0.0791376	>200	0
ANGPTL5	NC_006088.4	182851318	182865385	+	1	7	0.0075	0	1	4	3	0.0917046	>200	0
TECR	NC_006095.4	13758914	13782679	-	1	7	0.0075	1	0	7	0	0.0917046	22	3.86035
POMT1	NC_006104.4	6695504	6709255	+	1	8	0.0085	0	1	3	5	0.1041	105	3.03402
PLOD1	NC_006108.4	5514105	5531231	-	1	9	0.0079	1	0	9	0	0.116327	>200	0
TMEM55A	NC_006089.4	125284296	125307712	-	1	9	0.0079	0	1	7	2	0.116327	>200	0
KCNMB1	NC_006100.4	3783438	3790487	+	1	10	0.0083	0	1	0	10	0.128386	>200	0
OPN3	NC_006090.4	35923067	35941688	+	1	10	0.0083	0	1	2	8	0.128386	180	2.23988
PIGM	NC_006090.4	35981093	35983021	-	1	10	0.0083	0	1	1	9	0.128386	>200	0
GOLPH3	NC_006127.4	9664934	9697216	-	1	11	0.012	0	1	5	6	0.140281	>200	0
CTLA4	NC_006094.4	13462499	13465952	-	1	12	0.0104	0	1	5	7	0.152014	>200	0
LIN9	NC_006090.4	17065164	17104451	+	1	12	0.0104	1	0	10	2	0.152014	>200	0
SAP130	NC_006096.4	1471115	1490988	-	2	53	0.001	0	2	8	45	0.163246	>200	0
CALCA	NC_006092.4	10532056	10544141	+	1	16	0.0142	0	1	6	10	0.197366	>200	0
LRRIQ1	NC_006088.4	41739769	41825966	+	1	16	0.0142	0	1	9	7	0.197366	>200	0
GABRP	NC_006100.4	3486227	3511407	-	1	18	0.0164	0	1	5	13	0.219125	>200	0
MTMR12	NC_006127.4	9709263	9742498	-	1	18	0.0164	0	1	9	9	0.219125	>200	0
NEK9	NC_006092.4	38203436	38227085	-	1	19	0.0165	0	1	16	3	0.229782	>200	0
RANBP9	NC_006089.4	60723916	60761858	-	1	19	0.0165	0	1	9	10	0.229782	>200	0
MLLT3	NC_006127.4	34027175	34141802	-	1	20	0.0161	0	1	10	10	0.240294	>200	0
ZC3H11A	NC_006113.4	471163	486103	+	1	20	0.0161	0	1	2	18	0.240294	>200	0
MTM1	NC_006091.4	17808968	17851690	-	2	70	0.0017	0	2	9	61	0.247668	>200	0
NDST3	NC_006091.4	55377747	55489121	-	3	129	0.0002	0	3	15	114	0.258343	3	5.4356
KIAA1919	NC_006090.4	66360890	66371123	-	1	22	0.0196	0	1	0	22	0.260889	>200	0
LOC101752151	NC_006127.4	60458227	60462961	-	1	22	0.0196	0	1	0	22	0.260889	>200	0
LOC107051465	NC_006088.4	148838314	148839811	-	1	22	0.0196	0	1	0	22	0.260889	>200	0
LOC427259	NC_006127.4	37329741	37335981	-	1	22	0.0196	0	1	1	21	0.260889	>200	0
NDST4	NC_006091.4	56456769	56569952	+	3	132	0.0004	0	3	6	126	0.269357	8	4.54283
LGR6	NC_006113.4	398351	473948	+	1	24	0.0178	0	1	5	19	0.280926	>200	0
FANCF	NC_006092.4	2902160	2904877	-	1	25	0.0215	0	1	0	25	0.29074	>200	0
PDE3B	NC_006092.4	10434605	10509847	+	1	25	0.0215	0	1	13	12	0.29074	>200	0
SLC24A2	NC_006127.4	33788860	33891969	-	1	26	0.025	0	1	10	16	0.30042	11	4.97109
SLITRK5	NC_006088.4	149395768	149401706	-	1	31	0.0263	0	1	5	26	0.346874	2	5.44127
ARAP2	NC_006091.4	70638973	70772169	+	1	32	0.0272	0	1	17	15	0.355788	>200	0
ANKRD32	NC_006127.4	57807565	57848705	-	2	92	0.0023	1	1	5	87	0.357972	>200	0
SLC17A6	NC_006092.4	2768719	2800390	+	1	33	0.0248	0	1	8	25	0.364581	9	4.72157
PPM1B	NC_006090.4	25477569	25536128	+	1	34	0.0313	1	0	9	25	0.373253	>200	0
TRAIL-LIKE	NC_006091.4	9628199	9634772	-	1	34	0.0313	0	1	0	34	0.373253	>200	0
LOC107052661	NC_006089.4	82247957	82250877	+	1	36	0.0316	0	1	0	36	0.390245	>200	0
TMEM161B	NC_006127.4	60592899	60637640	+	1	36	0.0316	0	1	5	31	0.390245	154	2.47607
CETN3	NC_006127.4	59736140	59752762	+	4	249	0.0002	0	4	4	245	0.441849	>200	0
AGR3	NC_006089.4	28653716	28664156	-	1	43	0.0358	0	1	1	42	0.44617	>200	0
NWD2	NC_006091.4	70366843	70416650	-	1	43	0.0358	0	1	23	20	0.44617	8	6.03448
MPHOSPH6	NC_006098.4	16021209	16028384	-	2	111	0.0037	0	2	4	107	0.448324	>200	0
ZBED4	NC_006088.4	18815682	18840096	+	2	111	0.0037	0	2	11	100	0.448324	>200	0
MEF2C	NC_006127.4	60303678	60440726	+	5	324	0	0	5	21	303	0.453543	5	6.254
PRRC2B	NC_006104.4	6638001	6695341	+	1	46	0.0414	0	1	37	9	0.46854	8	4.2456
TSPAN18	NC_006092.4	22127305	22175544	+	1	47	0.0382	0	1	0	47	0.475794	>200	0
DTHD1	NC_006091.4	70625209	70638449	-	1	50	0.0433	0	1	4	46	0.496967	>200	0
GRIP2	NC_006099.4	11044109	11256598	-	1	50	0.0433	0	1	10	40	0.496967	>200	0
CCDC82	NC_006088.4	184977031	184990275	+	2	124	0.006	0	2	0	124	0.505859	>200	0
ANKRD26	NC_006088.4	24294540	24342686	+	1	52	0.0453	0	1	4	48	0.510606	>200	0
HS6ST1	NC_006096.4	1549897	1715952	-	2	127	0.0073	0	2	2	125	0.518572	121	2.95131
ARL6	NC_006088.4	91211031	91229743	+	1	54	0.0459	0	1	2	52	0.523875	47	3.11903
CNGB3	NC_006089.4	123704852	123731705	-	1	54	0.0459	0	1	4	50	0.523875	>200	0
LOC107052366	NC_006127.4	60454151	60456750	+	1	55	0.0469	0	1	0	55	0.530374	>200	0
PCSK5	NC_006127.4	37062787	37324242	+	1	55	0.0469	0	1	23	32	0.530374	>200	0
LOC100857299	NC_006127.4	49468851	49470760	-	1	57	0.05	0	1	0	57	0.543107	>200	0
OLFM3	NC_006095.4	11447650	11502318	+	1	57	0.05	0	1	8	49	0.543107	1	5.77505
ADGRD1	NC_006102.4	3062231	3191688	-	1	58	0.0496	0	1	12	46	0.549343	>200	0
GPR39	NC_006094.4	29857599	29921978	+	1	59	0.0516	0	1	2	57	0.555495	74	2.84843
PTPRB	NC_006088.4	35841486	35907487	-	1	59	0.0516	0	1	27	32	0.555495	>200	0
MCTP1	NC_006127.4	57530563	57796560	+	1	61	0.052	0	1	8	53	0.567547	25	4.04133
PTPRR	NC_006088.4	35908157	36065249	-	1	62	0.0528	0	1	14	48	0.57345	17	4.28252
SLC7A13	NC_006089.4	123199214	123205624	-	1	62	0.0528	0	1	3	59	0.57345	>200	0
REV3L	NC_006090.4	66236715	66360667	+	1	63	0.0533	0	1	30	33	0.579272	163	2.14078
STX2	NC_006102.4	2926591	3223484	+	1	64	0.0582	0	1	6	58	0.585015	>200	0
PIGC	NC_006095.4	4536840	4538746	+	1	65	0.0544	0	1	1	64	0.59068	>200	0
CHRM3	NC_006090.4	36525270	36699043	-	1	66	0.0556	0	1	5	61	0.596267	3	5.45043
ABRA	NC_006089.4	131613633	131620700	-	1	68	0.0549	0	1	0	68	0.607214	>200	0
LOC107054428	NC_006099.4	11027821	11038776	-	1	68	0.0549	0	1	6	62	0.607214	>200	0
DNM3	NC_006095.4	4543917	4710106	-	1	75	0.0604	0	1	11	64	0.643244	5	5.23122
G2E3	NC_006092.4	34158506	34182804	+	1	75	0.0604	0	1	3	72	0.643244	>200	0
BRMS1L	NC_006092.4	36396648	36415543	+	1	76	0.0625	0	1	9	67	0.648114	5	4.82359
KIAA0825	NC_006127.4	57848729	58078152	+	1	76	0.0625	0	1	21	55	0.648114	>200	0
CBR4	NC_006091.4	25755958	25763029	+	3	244	0.0008	0	3	4	240	0.648463	>200	0
MTNR1B	NC_006088.4	186280285	186300517	-	2	163	0.0086	0	2	4	159	0.653459	>200	0
HDAC2	NC_006090.4	64980447	65003180	+	1	78	0.0667	0	1	9	69	0.657655	>200	0
NARS2	NC_006088.4	192670661	192723417	+	1	78	0.0667	0	1	3	75	0.657655	>200	0
RNGTT	NC_006090.4	76121811	76306521	+	1	78	0.0667	0	1	9	69	0.657655	>200	0
NT5C1B	NC_006090.4	101000666	101006629	-	3	248	0.0011	0	3	1	247	0.659216	>200	0
COL11A1	NC_006095.4	11151567	11318749	+	1	81	0.0729	0	1	29	52	0.671485	>200	0
LOC107052830	NC_006089.4	143796718	143797731	-	1	82	0.0653	0	1	0	82	0.675969	>200	0
SLC8A3	NC_006092.4	27578513	27715375	+	1	82	0.0653	0	1	15	67	0.675969	10	4.59862
VSTM2A	NC_006089.4	82526076	82581354	+	1	82	0.0653	0	1	8	74	0.675969	1	6.60283
OTOR	NC_006090.4	5669202	5674198	+	1	83	0.0699	0	1	2	81	0.680393	>200	0
TANK	NC_006094.4	21566139	21593800	-	1	83	0.0699	0	1	7	76	0.680393	>200	0
SMOC1	NC_006092.4	27715458	27835450	-	1	84	0.0732	0	1	6	78	0.684756	169	2.59872
LYPD1	NC_006094.4	29920902	29935804	-	2	173	0.0096	0	2	0	173	0.685129	3	5.40984
HMGCLL1	NC_006090.4	87805618	87878838	+	1	86	0.0737	0	1	4	82	0.693304	4	4.639
EFNA5	NC_006127.4	48046710	48253798	+	2	176	0.0096	0	2	10	166	0.694154	132	2.44975
MAMLD1	NC_006091.4	17863213	17942344	-	2	177	0.0109	0	2	13	164	0.697115	4	4.70939
BMP5	NC_006090.4	87684480	87740094	+	1	88	0.0752	0	1	8	80	0.701621	>200	0
TENM2	NC_006100.4	4819802	5442558	-	6	520	0	0	6	33	487	0.713478	3	5.55523
BORA	NC_006088.4	156259756	156279329	-	2	186	0.0107	0	2	1	185	0.7227	>200	0
RBMS1	NC_006094.4	21739533	21879812	+	1	94	0.0798	0	1	7	87	0.725242	>200	0
TRAPPC12	NC_006090.4	94019728	94067086	+	1	94	0.0798	0	1	11	83	0.725242	65	2.63844
PPP1R3A	NC_006088.4	26361962	26388835	+	1	95	0.0773	0	1	5	90	0.728993	>200	0
PCDH10	NC_006091.4	27094884	27133196	+	6	531	0	0	6	12	519	0.731762	3	5.28389
TPCN2	NC_006092.4	17116917	17139354	+	2	192	0.0114	0	2	3	189	0.738723	>200	0
CD82	NC_006092.4	21974445	22009100	+	1	98	0.0777	0	1	1	97	0.739941	>200	0
LOC101748913	NC_006088.4	153734147	153735735	-	1	98	0.0777	0	1	0	98	0.739941	>200	0
CNR1	NC_006090.4	76446120	76464108	+	1	99	0.0831	0	1	12	87	0.743491	1	7.83488
TLE4	NC_006127.4	38471655	38569978	+	3	284	0.0023	0	3	14	270	0.745277	>200	0
DAAM2	NC_006090.4	28814228	29011772	-	1	100	0.0808	0	1	23	77	0.746993	61	2.77833
SLC6A15	NC_006088.4	41628233	41664415	-	1	102	0.0836	0	1	13	89	0.753854	3	5.30704
CDH12	NC_006089.4	73398953	73617480	+	1	103	0.0809	0	1	15	88	0.757215	5	5.71446
TMEM60	NC_006088.4	12504419	12508814	+	1	105	0.0876	0	1	0	105	0.763799	>200	0
MMP16	NC_006089.4	124196143	124391614	-	1	106	0.0892	0	1	19	87	0.767023	3	4.9472
ANGPT1	NC_006089.4	131784819	131949415	-	1	107	0.0897	0	1	7	100	0.770204	>200	0
AHR	NC_006089.4	28818151	28878615	+	1	108	0.0864	0	1	14	94	0.773341	>200	0
CCND1	NC_006092.4	17526264	17539488	+	2	212	0.012	0	2	4	208	0.786514	>200	0
CNTN5	NC_006088.4	183529156	184134946	-	2	212	0.012	0	2	20	192	0.786514	3	5.29486
ZIC4	NC_006096.4	11914803	11933671	-	2	212	0.012	0	2	11	201	0.786514	19	3.98821
CDH13	NC_006098.4	16185562	16630514	+	3	305	0.0029	0	3	17	288	0.786896	5	4.15144
CDH5	NC_006098.4	11674058	11703456	-	2	213	0.0158	0	2	9	204	0.788689	>200	0
EN1	NC_006094.4	28670390	28673643	+	2	214	0.0157	0	2	2	212	0.790843	38	3.53116
KCND2	NC_006088.4	23518399	23787753	-	1	114	0.0968	0	1	9	105	0.791286	1	5.65953
LOC101751827	NC_006092.4	13208130	13209808	+	1	115	0.0942	0	1	1	114	0.794136	>200	0
LOC107052757	NC_006089.4	120244001	120340694	+	1	115	0.0942	0	1	0	115	0.794136	>200	0
POU4F1	NC_006088.4	153534234	153538704	+	1	115	0.0942	0	1	4	111	0.794136	154	2.71442
AP5M1	NC_006092.4	55699098	55709323	-	1	120	0.0982	0	1	0	120	0.807811	>200	0
CDH10	NC_006089.4	72373150	72468883	+	1	121	0.0992	0	1	9	112	0.810435	8	4.51356
KCNQ1	NC_006092.4	13230927	13552841	-	1	121	0.0992	0	1	9	112	0.810435	>200	0
LOC100859897	NC_006088.4	163983202	163983832	+	1	121	0.0992	0	1	0	121	0.810435	>200	0
MBIP	NC_006092.4	36563357	36576650	-	1	121	0.0992	0	1	3	118	0.810435	>200	0
SP8	NC_006089.4	30247258	30251331	-	1	121	0.0992	0	1	4	117	0.810435	90	3.07393
RSPO3	NC_006090.4	59437846	59497439	-	1	122	0.0973	0	1	7	115	0.813023	>200	0
GPR85	NC_006088.4	26676407	26682294	+	1	123	0.0988	0	1	7	116	0.815576	5	5.17004
LOC101750125	NC_006090.4	30485465	30513553	+	1	123	0.0988	0	1	0	123	0.815576	>200	0
SP4	NC_006089.4	30491092	30516966	+	1	124	0.0995	0	1	12	112	0.818094	30	3.40795
RYR2	NC_006090.4	37305242	37666395	-	1	125	0.1043	0	1	75	50	0.820577	>200	0
TLE1	NC_006127.4	39181674	39255320	-	2	229	0.0154	0	2	17	212	0.820905	>200	0
MOCS1	NC_006090.4	28773084	28803915	+	1	126	0.1015	0	1	6	120	0.823027	>200	0
INSIG2	NC_006094.4	28984337	28997158	-	2	234	0.0166	0	2	7	227	0.830029	>200	0
SNX20	NC_006098.4	6298048	6308951	+	1	129	0.1069	0	1	3	126	0.830178	>200	0
UMPS	NC_006094.4	28012325	28018163	+	1	129	0.1069	0	1	2	127	0.830178	>200	0
SCN5A	NC_006089.4	5455632	5660539	+	1	131	0.107	0	1	35	96	0.834783	>200	0
LOC107053286	NC_006091.4	72382562	72384222	-	1	133	0.1064	0	1	0	133	0.839264	>200	0
SLITRK4	NC_006091.4	9938287	9947785	+	1	135	0.1092	0	1	8	127	0.843624	1	6.04281
FEZF2	NC_006099.4	13157698	13169225	-	1	136	0.1138	0	1	11	125	0.845759	6	5.1893
CEP44	NC_006091.4	43989124	44002719	+	1	137	0.1123	0	1	3	134	0.847865	>200	0
KCNC2	NC_006088.4	37629146	37726368	-	1	137	0.1123	0	1	17	120	0.847865	3	5.76466
GRAMD3	NC_006127.4	78952356	78994120	-	1	138	0.1126	0	1	3	135	0.849942	>200	0
LRP12	NC_006089.4	130597099	130649719	-	1	139	0.1174	0	1	17	122	0.851991	89	2.63698
SLC7A11	NC_006091.4	29138177	29196482	-	1	141	0.1177	0	1	7	134	0.856005	>200	0
PSAT1	NC_006127.4	37963261	37978946	+	1	143	0.1177	0	1	6	137	0.859911	>200	0
NRXN1	NC_006090.4	6563240	7213964	+	2	256	0.0204	0	2	29	227	0.865376	10	4.83514
FAM19A4	NC_006099.4	15216977	15289827	-	1	146	0.1162	0	1	6	140	0.865571	>200	0
ISX	NC_006088.4	52290223	52317487	-	1	147	0.1241	0	1	1	146	0.867407	>200	0
HS3ST5	NC_006090.4	64736737	64936541	+	1	149	0.1213	0	1	10	139	0.871003	18	4.36163
LOC101747537	NC_006091.4	71002392	71011893	+	1	150	0.1189	0	1	0	150	0.872765	>200	0
EXOG	NC_006089.4	5739588	5758838	-	1	152	0.1253	0	1	3	149	0.876216	173	2.24721
URI1	NC_006098.4	8625512	8665926	+	1	153	0.1253	0	1	6	147	0.877906	>200	0
CENPW	NC_006090.4	59770150	59777194	-	1	154	0.1144	0	1	1	153	0.879573	>200	0
PACRG	NC_006090.4	44418810	44610987	-	1	159	0.1235	0	1	4	155	0.887574	>200	0
EPHA6	NC_006088.4	90714721	91209121	+	1	160	0.1281	0	1	18	142	0.889109	4	5.74084
VEGFA	NC_006090.4	30739147	30759022	-	1	160	0.1281	0	1	6	154	0.889109	>200	0
ARL4A	NC_006089.4	26855397	26858311	+	1	161	0.1312	0	1	6	155	0.890623	>200	0
RALYL	NC_006089.4	122750127	123128753	+	1	161	0.1312	0	1	10	151	0.890623	3	5.55666
MAGI2	NC_006088.4	11695397	12420711	+	1	162	0.1273	0	1	22	140	0.892117	4	5.08417
CADPS	NC_006099.4	13178446	13352400	-	1	164	0.1342	0	1	25	139	0.895043	6	5.22342
CMPK2	NC_006090.4	95394054	95401297	-	1	165	0.1423	0	1	0	165	0.896477	>200	0
HAND2	NC_006091.4	43676569	43677709	-	1	167	0.1307	0	1	1	166	0.899285	>200	0
ITGA1	NC_006127.4	15771740	15844439	+	1	169	0.1324	0	1	14	155	0.902017	>200	0
FSHR	NC_006090.4	7457073	7534567	+	1	170	0.1345	0	1	3	167	0.903355	>200	0
LOC100857117	NC_006091.4	28172128	28173788	-	3	392	0.0047	0	3	0	392	0.903598	>200	0
AGPAT4	NC_006090.4	45311361	45382160	+	1	173	0.1452	0	1	6	167	0.90726	17	4.0976
MYT1L	NC_006090.4	93376945	93675483	-	1	174	0.1366	0	1	22	152	0.908527	1	5.66976
ANKRD50	NC_006091.4	53218464	53260011	+	1	176	0.1375	0	1	7	169	0.911008	>200	0
RAP1GDS1	NC_006091.4	60076754	60165898	+	1	177	0.1438	0	1	15	162	0.912223	11	4.57557
CYP3A4	NC_006101.4	3893076	3904532	+	1	179	0.1457	0	1	2	177	0.914604	>200	0
NCKAP5	NC_006094.4	29936250	30299719	-	1	181	0.1462	0	1	27	154	0.916921	145	2.3516
STIM2	NC_006091.4	73554049	73619282	-	1	181	0.1462	0	1	17	164	0.916921	27	3.51865
TRHDE	NC_006088.4	36640178	36861001	+	1	181	0.1462	0	1	18	163	0.916921	1	5.86822
KALRN	NC_006094.4	27566458	28012156	+	1	182	0.1455	0	1	53	129	0.918055	8	5.46981
LOC107054266	NC_006098.4	4278280	4280481	-	1	182	0.1455	0	1	2	180	0.918055	>200	0
LOC771474	NC_006089.4	87189722	87190507	-	1	182	0.1455	0	1	0	182	0.918055	>200	0
LOC107052504	NC_006089.4	25702793	25707750	-	1	183	0.1468	0	1	0	183	0.919175	>200	0
OSR1	NC_006090.4	101471165	101479312	-	3	417	0.0066	0	3	5	412	0.924264	>200	0
FOXL1	NC_006098.4	17583046	17584870	-	1	188	0.1533	0	1	1	187	0.924545	>200	0
ZDHHC7	NC_006098.4	17245308	17262718	-	1	191	0.1549	0	1	8	183	0.927594	>200	0
FAM19A1	NC_006099.4	14957751	15163978	+	1	192	0.148	0	1	8	184	0.928583	3	5.64345
CXADR	NC_006088.4	99316802	99348340	+	1	193	0.1566	0	1	8	185	0.929559	14	3.74745
KHDRBS3	NC_006089.4	143191892	143272288	+	1	194	0.1562	0	1	7	187	0.930521	2	5.24987
SLC39A10	NC_006094.4	9595563	9682845	+	1	194	0.1562	0	1	9	185	0.930521	7	4.66735
SDK1	NC_006101.4	3529579	3889916	+	1	197	0.1522	0	1	19	178	0.933329	148	2.18126
NUDT1	NC_006101.4	3084874	3088883	+	1	200	0.1548	0	1	1	199	0.936023	>200	0
FAM172A	NC_006127.4	58092017	58355900	+	1	201	0.1566	0	1	5	196	0.936897	116	2.5927
SULT1E1	NC_006091.4	52140103	52142019	-	1	204	0.1584	0	1	0	204	0.939447	>200	0
LOC101748762	NC_006096.4	12132300	12179011	-	2	331	0.0347	0	2	0	331	0.941045	>200	0
OTX2	NC_006092.4	55922271	55929736	+	1	208	0.162	0	1	9	199	0.942688	>200	0
GRB14	NC_006094.4	20231657	20300305	+	1	209	0.1645	0	1	8	201	0.943471	>200	0
RP11-505K9.4	NC_006098.4	16757889	16791497	-	1	210	0.1646	0	1	2	208	0.944243	>200	0
PCDH18	NC_006091.4	28880214	28890093	-	1	211	0.1662	0	1	9	202	0.945005	>200	0
TMEM242	NC_006090.4	51679644	51700070	-	1	211	0.1662	0	1	1	210	0.945005	>200	0
FIGN	NC_006094.4	20583699	20684258	+	1	212	0.1619	0	1	20	192	0.945756	>200	0
SALL1	NC_006098.4	6046344	6061077	+	4	557	0.0012	0	4	11	546	0.946007	150	2.39515
LARGE	NC_006088.4	52727461	53014555	+	1	213	0.1681	0	1	19	194	0.946497	>200	0
NXPH1	NC_006089.4	25115672	25278218	+	1	217	0.1704	0	1	7	210	0.94936	2	5.81276
TOX3	NC_006098.4	5324989	5446431	+	3	458	0.0066	0	3	11	447	0.949545	83	2.67928
SPRY1	NC_006091.4	53712801	53718389	-	1	218	0.1743	0	1	1	217	0.950052	>200	0
PCDH17	NC_006088.4	163442841	163529605	-	2	350	0.0359	0	2	23	327	0.952465	9	3.96164
EIF3H	NC_006089.4	135502011	135582971	-	1	225	0.1744	0	1	7	218	0.954636	>200	0
SPRED1	NC_006092.4	30750697	30805932	-	1	228	0.1779	0	1	10	218	0.95647	12	3.47411
RAB28	NC_006091.4	78013069	78074270	+	1	229	0.1866	0	1	4	225	0.957065	34	3.4316
ISL1	NC_006127.4	15144263	15156962	+	1	230	0.1826	0	1	5	225	0.957651	>200	0
NLGN1	NC_006096.4	18809663	19157393	-	1	232	0.1891	0	1	8	224	0.9588	4	5.17867
FAT3	NC_006088.4	186422748	186850194	-	2	367	0.0397	0	2	61	306	0.960863	5	5.14229
ELFN1	NC_006101.4	2661120	2758080	+	1	236	0.1854	0	1	14	222	0.961005	11	5.18411
PEX2	NC_006089.4	119927998	119951130	-	1	236	0.1854	0	1	4	232	0.961005	>200	0
FAT4	NC_006091.4	52850742	52987964	-	1	242	0.1932	0	1	16	226	0.964094	>200	0
PIK3C2G	NC_006088.4	63952670	64233247	+	1	244	0.1858	0	1	11	233	0.965068	>200	0
ESRRG	NC_006090.4	20241793	20358377	+	2	379	0.0437	0	2	7	372	0.965913	17	4.18984
HS3ST1	NC_006091.4	78613856	78624957	+	1	248	0.1854	0	1	5	243	0.966938	>200	0
TMEFF2	NC_006094.4	8226217	8335805	-	1	251	0.1884	0	1	9	242	0.968275	30	4.14749
MPLKIP	NC_006089.4	50140128	50148713	-	1	252	0.2002	0	1	4	248	0.968708	>200	0
TDRD15	NC_006090.4	102733739	102742985	+	2	389	0.0419	0	2	1	388	0.969636	>200	0
IRX6	NC_006098.4	3977097	3980535	-	1	257	0.1958	0	1	2	255	0.970788	135	2.85217
PRKD1	NC_006092.4	33847783	33962495	-	1	260	0.2007	0	1	13	247	0.971969	>200	0
LOC101748927	NC_006127.4	32243479	32246158	+	1	261	0.2014	0	1	0	261	0.972352	>200	0
CDH6	NC_006089.4	69532903	69629567	-	1	262	0.1952	0	1	12	250	0.972729	78	2.91864
DIAPH3	NC_006088.4	162382456	162621744	+	1	263	0.2093	0	1	14	249	0.973102	>200	0
UNC5C	NC_006091.4	58974436	59219642	-	1	267	0.2027	0	1	11	256	0.974542	24	3.23439
DPH6	NC_006092.4	31989703	32173952	+	1	268	0.2052	0	1	6	262	0.97489	>200	0
SPATA17	NC_006090.4	19676487	19766954	-	1	272	0.2085	0	1	4	268	0.976234	>200	0
HAAO	NC_006090.4	24178252	24209583	-	1	276	0.2085	0	1	1	275	0.977506	>200	0
CDH11	NC_006098.4	12274830	12354154	+	2	415	0.0478	0	2	20	395	0.977571	>200	0
LOC101748831	NC_006088.4	192448590	192602478	+	1	278	0.2177	0	1	27	251	0.978117	>200	0
ANGEL2	NC_006090.4	21756490	21768768	+	1	279	0.2096	0	1	6	273	0.978416	>200	0
METTL22	NC_006101.4	10160754	10192916	-	2	423	0.052	0	2	3	420	0.979579	>200	0
ZFP36L2	NC_006090.4	25044638	25048982	-	1	284	0.211	0	1	3	281	0.979851	>200	0
PDE10A	NC_006090.4	43199523	43470730	+	1	287	0.2121	0	1	20	267	0.980665	18	4.76468
BNC2	NC_006127.4	32322686	32692066	-	1	292	0.2219	0	1	23	269	0.98195	>200	0
SMARCA1	NC_006091.4	14366386	14394833	+	1	294	0.2256	0	1	21	273	0.98244	3	4.39652
ZNF608	NC_006127.4	79623730	79721327	+	1	294	0.2256	0	1	22	272	0.98244	31	2.78245
ETV1	NC_006089.4	27321167	27392291	-	1	296	0.221	0	1	17	279	0.982917	40	3.29979
VRK1	NC_006092.4	46691972	46725680	+	1	298	0.2315	0	1	6	292	0.98338	>200	0
C12H3ORF14	NC_006099.4	13145583	13155471	+	1	300	0.2275	0	1	2	298	0.983831	>200	0
USP25	NC_006088.4	98606720	98697017	+	1	303	0.2272	0	1	19	284	0.984485	>200	0
KIF16B	NC_006090.4	5502445	5637488	-	1	309	0.2293	0	1	15	294	0.985714	>200	0
FLRT3	NC_006090.4	4687981	4701438	-	1	318	0.238	0	1	7	311	0.987378	7	3.73181
ZFPM2	NC_006089.4	130901230	131210109	+	1	318	0.238	0	1	14	304	0.987378	2	4.80581
TFEC	NC_006088.4	25289184	25351175	+	1	320	0.2456	0	1	5	315	0.987721	>200	0
PTPRN2	NC_006089.4	8816884	9460963	-	1	322	0.2409	0	1	15	307	0.988054	20	3.80203
DNAJB6	NC_006089.4	8685144	8735010	+	1	327	0.252	0	1	6	321	0.988848	>200	0
LMO3	NC_006088.4	63380640	63450118	-	1	329	0.2401	0	1	5	324	0.989151	1	5.53028
SOX11	NC_006090.4	94937212	94939190	+	1	329	0.2401	0	1	2	327	0.989151	47	3.38744
HNF4G	NC_006089.4	119106351	119164146	+	1	330	0.2496	0	1	8	322	0.989299	>200	0
USH2A	NC_006090.4	20386252	20756743	+	1	330	0.2496	0	1	54	276	0.989299	>200	0
OLFM4	NC_006088.4	165561980	165586181	-	1	331	0.2526	0	1	2	329	0.989445	>200	0
IRX2	NC_006089.4	86902003	86907513	-	1	334	0.2511	0	1	3	331	0.989872	>200	0
CDK5RAP2	NC_006104.4	5032684	5106426	-	1	354	0.2506	0	1	16	338	0.992309	>200	0
PTPRG	NC_006099.4	12750103	13127787	+	1	360	0.2697	0	1	29	331	0.992918	26	2.77558
NAALADL2	NC_006096.4	18399365	18686028	-	1	367	0.2739	0	1	3	364	0.993569	>200	0
LOC107053116	NC_006090.4	71974116	71975316	-	1	384	0.2875	0	1	0	384	0.99491	>200	0
DACH1	NC_006088.4	156675373	157044066	+	2	545	0.0769	0	2	16	529	0.995253	>200	0
ARID1B	NC_006090.4	51306805	51625729	+	2	546	0.08	1	1	24	522	0.99531	>200	0
PROX1	NC_006090.4	21309365	21357222	-	1	396	0.2937	0	1	19	377	0.995685	>200	0
RBMS3	NC_006089.4	39050906	39749690	+	1	408	0.3006	0	1	25	383	0.996342	30	3.04451
TENM1	NC_006091.4	15264602	15591324	+	1	408	0.3006	0	1	31	377	0.996342	1	5.78231
TGFBR2	NC_006089.4	39945498	40009681	+	1	413	0.3044	0	1	10	403	0.996585	>200	0
SLC35B3	NC_006089.4	64338393	64365868	+	1	425	0.301	0	1	7	418	0.997105	>200	0
C5H15ORF41	NC_006092.4	31454000	31569431	-	1	434	0.3183	0	1	9	425	0.997442	>200	0
INHBA	NC_006089.4	50745139	50762744	-	1	434	0.3183	0	1	11	423	0.997442	>200	0
MMS22L	NC_006090.4	72689090	72777286	+	1	440	0.3142	0	1	7	433	0.997645	>200	0
OFCC1	NC_006089.4	63662562	63836899	+	1	446	0.3152	0	1	8	438	0.997832	>200	0
TRPS1	NC_006089.4	134920969	135127454	-	1	449	0.3169	0	1	18	431	0.997919	>200	0
MEIS2	NC_006092.4	31240705	31409368	+	1	467	0.3384	0	1	13	454	0.998376	9	3.92238
LPHN2	NC_006095.4	17456472	17605244	-	2	635	0.1037	0	2	29	606	0.998425	>200	0
KLHL29	NC_006090.4	104033595	104436710	+	2	641	0.1064	0	2	14	627	0.998537	5	5.36146
ZFHX4	NC_006089.4	119722610	119876959	+	1	476	0.3347	0	1	35	441	0.998565	80	3.11883
ARHGAP15	NC_006094.4	32874820	33193631	+	1	482	0.3327	0	1	10	472	0.998679	>200	0
ADGRL4	NC_006095.4	18585545	18660941	+	2	652	0.1126	0	2	11	641	0.998724	>200	0
GBA3	NC_006091.4	74859830	74890792	-	1	507	0.3689	0	1	3	504	0.999064	>200	0
MDFIC	NC_006088.4	25764792	25813425	-	1	511	0.3561	0	1	7	504	0.999114	>200	0
PPARGC1A	NC_006091.4	74250323	74596901	+	1	519	0.3615	0	1	21	498	0.999206	32	3.67254
C3ORF30	NC_006088.4	80801074	80804289	-	1	527	0.3611	0	1	0	527	0.999289	>200	0
ETNK1	NC_006088.4	66500887	66534184	-	1	546	0.3747	0	1	12	534	0.999453	10	4.52417
ZNF536	NC_006098.4	8766731	9093256	+	2	731	0.1283	0	2	27	704	0.999523	7	4.27701
ACVR2A	NC_006094.4	34687035	34744468	+	1	578	0.3857	0	1	4	574	0.999648	13	4.12108
GTDC1	NC_006094.4	33270007	33450697	-	1	599	0.4049	0	1	17	582	0.999736	54	2.97553
LOC107053591	NC_006092.4	47007100	47010020	+	3	977	0.0531	0	3	0	977	0.999847	>200	0
BRINP1	NC_006104.4	4502517	4580970	-	1	642	0.4249	0	1	8	634	0.999854	4	5.89618
BCL11B	NC_006092.4	47863249	47955061	-	2	832	0.1557	0	2	7	825	0.999867	10	4.89336
SOX5	NC_006088.4	65660324	66227364	+	1	653	0.426	0	1	14	639	0.999875	5	4.32781
ZEB2	NC_006094.4	33479454	33588073	-	1	787	0.491	0	1	12	775	0.99998	>200	0
LSAMP	NC_006088.4	82082453	82236106	+	1	860	0.5274	0	1	5	855	0.999993	2	5.24973
TSHZ3	NC_006098.4	9353383	9415544	-	1	897	0.5467	0	1	7	890	0.999996	11	4.08884
2020-03-02	NC_006090.4	18636009	18645648	-	0	0	NA	0	0	0	0	1	NA	NA
44G24.1	NC_006103.4	213710	214120	+	0	0	NA	0	0	0	0	1	NA	NA
A2ML4	NC_006114.4	1854416	1865042	+	0	0	NA	0	0	0	0	1	NA	NA
AADACL2	NC_006096.4	23543185	23553647	-	0	0	NA	0	0	0	0	1	NA	NA
AADACL4	NC_006108.4	5257336	5262105	-	0	0	NA	0	0	0	0	1	NA	NA
AAMDC	NC_006088.4	192986298	192997572	-	0	0	NA	0	0	0	0	1	>200	0
AARSD1	NC_006114.4	5515779	5517799	-	0	0	NA	0	0	0	0	1	NA	NA
ABHD1	NC_006090.4	104956314	104958474	+	0	0	NA	0	0	0	0	1	NA	NA
ABHD11	NC_006106.4	664448	668714	-	0	0	NA	0	0	0	0	1	>200	0
ABHD14A	NC_006099.4	3126968	3128672	-	0	0	NA	0	0	0	0	1	NA	NA
ABI3	NC_006114.4	3631245	3637401	-	0	0	NA	0	0	0	0	1	>200	0
AC006538.4	NC_006115.4	3281406	3287028	+	0	0	NA	0	0	0	0	1	NA	NA
AC024592.12	NC_006115.4	781603	784844	-	0	0	NA	0	0	0	0	1	NA	NA
ACAD10	NC_006102.4	6250648	6262658	+	0	0	NA	0	0	0	0	1	>200	0
ACAD8	NC_006111.4	2561328	2568053	+	0	0	NA	0	0	0	0	1	NA	NA
ACBD4	NC_006114.4	1517822	1523218	+	0	0	NA	0	0	0	0	1	NA	NA
ACCN2	NC_008465.3	311274	328944	-	0	0	NA	0	0	0	0	1	NA	NA
ACD	NC_006098.4	1216843	1224070	-	0	0	NA	0	0	0	0	1	NA	NA
ACKR2	NC_006089.4	2096443	2103105	+	0	0	NA	0	0	0	0	1	NA	NA
ACOT13	NC_006089.4	90550108	90554854	-	0	0	NA	0	0	0	0	1	NA	NA
ACOT4	NC_006092.4	26171452	26189325	-	0	0	NA	0	0	0	0	1	NA	NA
ACOT7	NC_006108.4	603557	610749	+	0	0	NA	0	0	0	0	1	NA	NA
ACOT8	NC_006107.4	10717665	10720090	-	0	0	NA	0	0	0	0	1	NA	NA
ACTG2	NC_006109.4	2844748	2847382	+	0	0	NA	0	0	0	0	1	NA	NA
ACTL7A	NC_006127.4	44870946	44875152	+	0	0	NA	0	0	0	0	1	NA	NA
ACTL9	NC_006115.4	1858801	1860428	-	0	0	NA	0	0	0	0	1	NA	NA
ACVR1B	NC_008465.3	10224	24826	-	0	0	NA	0	0	0	0	1	NA	NA
ACVRL1	NC_008465.3	25555	34159	-	0	0	NA	0	0	0	0	1	NA	NA
ACY1	NC_006099.4	3122776	3126982	-	0	0	NA	0	0	0	0	1	NA	NA
ADAM11	NC_006114.4	1409986	1421169	+	0	0	NA	0	0	0	0	1	7	5.07078
ADAM15	NC_006088.4	196180119	196199398	+	0	0	NA	0	0	0	0	1	NA	NA
ADAM20	NC_006102.4	6300038	6302497	+	0	0	NA	0	0	0	0	1	NA	NA
ADAM8	NC_006093.4	9361177	9373016	-	0	0	NA	0	0	0	0	1	NA	NA
ADAM9	NC_006109.4	2453215	2473536	+	0	0	NA	0	0	0	0	1	>200	0
ADAMTSL5	NC_006115.4	3256758	3261493	-	0	0	NA	0	0	0	0	1	NA	NA
ADAR	NC_006112.3	1735473	1747289	-	0	0	NA	0	0	0	0	1	NA	NA
ADCY10	NC_006127.4	73498506	73505856	+	0	0	NA	0	0	0	0	1	NA	NA
ADGRG3	NC_006098.4	573401	577686	-	0	0	NA	0	0	0	0	1	NA	NA
ADH1C	NC_006091.4	60372986	60383328	-	0	0	NA	0	0	0	0	1	>200	0
ADH6	NC_006091.4	60350739	60355094	-	0	0	NA	0	0	0	0	1	NA	NA
ADIPOQ	NC_006096.4	5223105	5227905	-	0	0	NA	0	0	0	0	1	NA	NA
ADIPOR1	NC_006113.4	1096476	1102994	+	0	0	NA	0	0	0	0	1	NA	NA
ADMP	NC_006115.4	885915	888150	-	0	0	NA	0	0	0	0	1	NA	NA
ADRA2B	NC_006100.4	10120368	10122155	+	0	0	NA	0	0	0	0	1	>200	0
ADRB3	NC_006109.4	2261764	2264797	-	0	0	NA	0	0	0	0	1	NA	NA
AEBP1	NC_006109.4	4717021	4728472	-	0	0	NA	0	0	0	0	1	NA	NA
AFMID	NC_006105.4	9950197	9953685	-	0	0	NA	0	0	0	0	1	NA	NA
AFP	NC_006091.4	51200719	51206909	+	0	0	NA	0	0	0	0	1	NA	NA
AGBL2	NC_006092.4	367987	371674	+	0	0	NA	0	0	0	0	1	NA	NA
AGMAT	NC_006108.4	4904670	4907956	+	0	0	NA	0	0	0	0	1	NA	NA
AGPAT1	NC_006114.4	1842862	1854433	+	0	0	NA	0	0	0	0	1	NA	NA
AGPAT1L	NC_006106.4	420918	425196	-	0	0	NA	0	0	0	0	1	NA	NA
AGRP	NC_006098.4	1457403	1458995	-	0	0	NA	0	0	0	0	1	NA	NA
AGT	NC_006090.4	40594174	40606101	-	0	0	NA	0	0	0	0	1	>200	0
AHCYL2	NC_006088.4	713454	757799	+	0	0	NA	0	0	0	0	1	NA	NA
AIFM1	NC_006091.4	1591047	1602751	+	0	0	NA	0	0	0	0	1	NA	NA
AIP	NC_006092.4	394308	396143	-	0	0	NA	0	0	0	0	1	NA	NA
AIPL1	NC_006091.4	2065764	2071343	+	0	0	NA	0	0	0	0	1	NA	NA
AK6	NC_006127.4	64160615	64164655	-	0	0	NA	0	0	0	0	1	NA	NA
AKNAD1	NC_006095.4	1294796	1307905	-	0	0	NA	0	0	0	0	1	NA	NA
AKR1B1L	NC_006088.4	62199783	62207930	-	0	0	NA	0	0	0	0	1	NA	NA
AL021546.6	NC_006102.4	9336199	9338298	-	0	0	NA	0	0	0	0	1	NA	NA
ALB	NC_006091.4	51168578	51181602	+	0	0	NA	0	0	0	0	1	>200	0
ALDH3B1	NC_006092.4	277793	284615	-	0	0	NA	0	0	0	0	1	NA	NA
ALG1	NC_006101.4	13439635	13449647	+	0	0	NA	0	0	0	0	1	NA	NA
ALG3	NC_006096.4	15914293	15916833	-	0	0	NA	0	0	0	0	1	NA	NA
ALKBH2	NC_006102.4	6693989	6705672	-	0	0	NA	0	0	0	0	1	NA	NA
ALKBH4	NC_006106.4	4125569	4127690	-	0	0	NA	0	0	0	0	1	NA	NA
ALPL	NC_006108.4	6616901	6622890	-	0	0	NA	0	0	0	0	1	>200	0
ALPP	NC_006096.4	15616383	15619474	+	0	0	NA	0	0	0	0	1	NA	NA
ALX3	NC_006113.4	1317940	1319133	-	0	0	NA	0	0	0	0	1	NA	NA
ALYREF	NC_006105.4	10031892	10036686	-	0	0	NA	0	0	0	0	1	>200	0
AMER1	NC_006091.4	11713138	11729514	+	0	0	NA	0	0	0	0	1	NA	NA
AMICA1	NC_006111.4	5430006	5435542	-	0	0	NA	0	0	0	0	1	NA	NA
ANAPC15	NC_006088.4	194257663	194260098	-	0	0	NA	0	0	0	0	1	NA	NA
ANG	NC_006093.4	9290892	9292328	-	0	0	NA	0	0	0	0	1	NA	NA
ANGPT1L	NC_006106.4	194195	195987	+	0	0	NA	0	0	0	0	1	NA	NA
ANGPTL6	NC_006106.4	188379	192896	-	0	0	NA	0	0	0	0	1	NA	NA
ANKLE1	NC_006115.4	3402639	3406301	+	0	0	NA	0	0	0	0	1	NA	NA
ANKMY1	NC_006104.4	735811	762910	-	0	0	NA	0	0	0	0	1	NA	NA
ANKRD16	NC_006088.4	1044337	1060891	+	0	0	NA	0	0	0	0	1	NA	NA
ANKRD2	NC_006093.4	22314447	22317328	-	0	0	NA	0	0	0	0	1	>200	0
ANKRD24	NC_006115.4	2617616	2625123	-	0	0	NA	0	0	0	0	1	31	3.836
ANKRD31	NC_006127.4	24029476	24087020	+	0	0	NA	0	0	0	0	1	NA	NA
ANKRD33	NC_008465.3	35905	49705	-	0	0	NA	0	0	0	0	1	NA	NA
ANKRD34B	NC_006127.4	64085211	64090423	+	0	0	NA	0	0	0	0	1	NA	NA
ANKRD34C	NC_006097.4	20002306	20009614	+	0	0	NA	0	0	0	0	1	6	5.40864
ANKRD49	NC_006088.4	185689480	185691512	-	0	0	NA	0	0	0	0	1	NA	NA
ANKRD52	NC_008465.3	728697	744086	-	0	0	NA	0	0	0	0	1	NA	NA
ANKRD61	NC_006101.4	971697	974144	-	0	0	NA	0	0	0	0	1	NA	NA
ANKZF1	NC_006094.4	22337067	22344365	-	0	0	NA	0	0	0	0	1	NA	NA
ANO8	NC_006115.4	3429136	3438114	-	0	0	NA	0	0	0	0	1	12	4.05527
ANO9	NC_006092.4	1493655	1508545	+	0	0	NA	0	0	0	0	1	>200	0
ANP32E	NC_006112.3	162050	174225	-	0	0	NA	0	0	0	0	1	NA	NA
ANPEP	NC_006097.4	20022608	20029726	-	0	0	NA	0	0	0	0	1	>200	0
ANXA4	NC_006109.4	4584810	4594055	+	0	0	NA	0	0	0	0	1	NA	NA
ANXA5	NC_006091.4	54326491	54351754	+	0	0	NA	0	0	0	0	1	>200	0
AOC1	NC_006089.4	334251	337642	-	0	0	NA	0	0	0	0	1	NA	NA
AOC3	NC_006114.4	5490347	5504360	+	0	0	NA	0	0	0	0	1	NA	NA
AOX2	NC_006094.4	11285807	11332344	+	0	0	NA	0	0	0	0	1	NA	NA
AP000295.9	NC_006088.4	105251521	105262186	+	0	0	NA	0	0	0	0	1	NA	NA
AP002884.2	NC_006111.4	6145622	6148525	-	0	0	NA	0	0	0	0	1	NA	NA
AP1B1	NC_006102.4	11196283	11209416	+	0	0	NA	0	0	0	0	1	99	2.68102
AP1M1	NC_006115.4	4424048	4431816	-	0	0	NA	0	0	0	0	1	>200	0
AP3S2	NC_006097.4	20031637	20035333	-	0	0	NA	0	0	0	0	1	13	3.98913
APBA3	NC_006115.4	974942	980349	+	0	0	NA	0	0	0	0	1	NA	NA
APBB1	NC_006088.4	194443725	194449356	+	0	0	NA	0	0	0	0	1	NA	NA
APBB3	NC_006100.4	1650439	1654697	-	0	0	NA	0	0	0	0	1	87	2.29837
APITD1	NC_006108.4	3726466	3729265	+	0	0	NA	0	0	0	0	1	NA	NA
APLN	NC_006091.4	1659423	1660999	+	0	0	NA	0	0	0	0	1	NA	NA
APLNR	NC_006092.4	17052883	17054353	+	0	0	NA	0	0	0	0	1	145	2.69137
APOA5	NC_006111.4	5103890	5106411	-	0	0	NA	0	0	0	0	1	NA	NA
APOC3	NC_006111.4	5109261	5109974	+	0	0	NA	0	0	0	0	1	NA	NA
APOD	NC_006096.4	12704211	12707168	+	0	0	NA	0	0	0	0	1	NA	NA
APOF	NC_008465.3	775233	776245	-	0	0	NA	0	0	0	0	1	NA	NA
APTX	NC_006127.4	70584679	70593677	-	0	0	NA	0	0	0	0	1	NA	NA
AQP10	NC_006112.3	2150925	2154431	+	0	0	NA	0	0	0	0	1	NA	NA
AQP2	NC_008465.3	1447223	1453005	+	0	0	NA	0	0	0	0	1	NA	NA
AQP5	NC_008465.3	1459760	1463920	+	0	0	NA	0	0	0	0	1	NA	NA
ARFIP2	NC_006088.4	194413343	194419471	+	0	0	NA	0	0	0	0	1	NA	NA
ARHGAP25	NC_006109.4	299878	316574	-	0	0	NA	0	0	0	0	1	>200	0
ARHGAP27	NC_006114.4	1738391	1756450	-	0	0	NA	0	0	0	0	1	NA	NA
ARHGEF11	NC_006112.3	1357481	1378565	+	0	0	NA	0	0	0	0	1	NA	NA
ARHGEF39	NC_006127.4	9280894	9296320	+	0	0	NA	0	0	0	0	1	>200	0
ARID5A	NC_006109.4	2799661	2807704	-	0	0	NA	0	0	0	0	1	NA	NA
ARL1	NC_006088.4	47732343	47737806	-	0	0	NA	0	0	0	0	1	>200	0
ARL10	NC_006100.4	10418403	10420966	-	0	0	NA	0	0	0	0	1	NA	NA
ARL13A	NC_006091.4	5171266	5175655	-	0	0	NA	0	0	0	0	1	NA	NA
ARL16	NC_006105.4	9970579	9972872	-	0	0	NA	0	0	0	0	1	NA	NA
ARL2	NC_006100.4	10105068	10108507	-	0	0	NA	0	0	0	0	1	NA	NA
ARMC6	NC_006115.4	3671406	3676466	-	0	0	NA	0	0	0	0	1	NA	NA
ARMC7	NC_006105.4	10749329	10751449	+	0	0	NA	0	0	0	0	1	NA	NA
ARNT	NC_006112.3	2589829	2610524	-	0	0	NA	0	0	0	0	1	NA	NA
ARPC4	NC_006099.4	11506589	11508357	+	0	0	NA	0	0	0	0	1	>200	0
ARPC5	NC_006095.4	7647635	7653452	-	0	0	NA	0	0	0	0	1	NA	NA
ARPC5L	NC_006104.4	10066086	10069817	-	0	0	NA	0	0	0	0	1	NA	NA
ARSA	NC_006088.4	116105	121720	-	0	0	NA	0	0	0	0	1	NA	NA
ARSD	NC_006088.4	128513710	128528605	+	0	0	NA	0	0	0	0	1	NA	NA
ARSE	NC_006088.4	128530830	128554756	+	0	0	NA	0	0	0	0	1	>200	0
ARSK	NC_006127.4	57413183	57424563	-	0	0	NA	0	0	0	0	1	NA	NA
ART1	NC_006088.4	194197428	194198714	-	0	0	NA	0	0	0	0	1	NA	NA
ART7B	NC_006088.4	194197428	194202909	-	0	0	NA	0	0	0	0	1	NA	NA
ART7C	NC_006088.4	194205081	194208030	+	0	0	NA	0	0	0	0	1	NA	NA
AS3MT	NC_006093.4	23394627	23398845	+	0	0	NA	0	0	0	0	1	NA	NA
ASB13	NC_006088.4	1116147	1127777	+	0	0	NA	0	0	0	0	1	NA	NA
ASB3	NC_006090.4	3040531	3073142	+	0	0	NA	0	0	0	0	1	NA	NA
ASCC1	NC_006093.4	11469736	11497209	+	0	0	NA	0	0	0	0	1	>200	0
ASH1L	NC_006112.3	2205058	2244183	-	0	0	NA	0	0	0	0	1	NA	NA
ASH2L	NC_006109.4	2281515	2288929	+	0	0	NA	0	0	0	0	1	>200	0
ATAD3A	NC_006108.4	2151087	2168547	-	0	0	NA	0	0	0	0	1	>200	0
ATF1	NC_008465.3	142878	156460	-	0	0	NA	0	0	0	0	1	NA	NA
ATF7	NC_008465.3	867075	913514	-	0	0	NA	0	0	0	0	1	NA	NA
ATHL1	NC_006092.4	1558887	1570781	-	0	0	NA	0	0	0	0	1	NA	NA
ATP13A2	NC_006108.4	4413160	4423782	-	0	0	NA	0	0	0	0	1	12	3.90021
ATP5B	NC_008465.3	1630552	1633524	+	0	0	NA	0	0	0	0	1	NA	NA
ATP5F1	NC_006113.4	3215740	3219199	+	0	0	NA	0	0	0	0	1	>200	0
ATP5G2	NC_008465.3	914333	916307	-	0	0	NA	0	0	0	0	1	NA	NA
ATP5H	NC_006105.4	10720624	10723378	-	0	0	NA	0	0	0	0	1	NA	NA
ATP5I	NC_006127.4	53483791	53485659	+	0	0	NA	0	0	0	0	1	NA	NA
ATP5L	NC_006111.4	4392636	4395761	-	0	0	NA	0	0	0	0	1	NA	NA
ATP5S	NC_006092.4	57918026	57922917	+	0	0	NA	0	0	0	0	1	NA	NA
ATP6	NC_001323.1	9240	9923	+	0	0	NA	0	0	0	0	1	NA	NA
ATP6V0E2	NC_006093.4	22093227	22094596	+	0	0	NA	0	0	0	0	1	NA	NA
ATP6V1B2	NC_006109.4	1603939	1612319	-	0	0	NA	0	0	0	0	1	NA	NA
ATP8	NC_001323.1	9085	9249	+	0	0	NA	0	0	0	0	1	NA	NA
ATP8B2	NC_006112.3	2154823	2162921	+	0	0	NA	0	0	0	0	1	NA	NA
ATRAID	NC_006090.4	104965552	104967028	+	0	0	NA	0	0	0	0	1	NA	NA
ATRIP	NC_006099.4	3280087	3292727	-	0	0	NA	0	0	0	0	1	>200	0
ATXN7L2	NC_006113.4	1216403	1218720	+	0	0	NA	0	0	0	0	1	NA	NA
AURKAIP1	NC_006108.4	2229753	2232691	+	0	0	NA	0	0	0	0	1	NA	NA
AvBD1	NC_006090.4	107914854	107917298	-	0	0	NA	0	0	0	0	1	NA	NA
AvBD10	NC_006090.4	107884729	107887346	+	0	0	NA	0	0	0	0	1	NA	NA
AvBD11	NC_006090.4	107863811	107866429	-	0	0	NA	0	0	0	0	1	NA	NA
AvBD12	NC_006090.4	107860143	107861042	-	0	0	NA	0	0	0	0	1	NA	NA
AvBD13	NC_006090.4	107850580	107855188	-	0	0	NA	0	0	0	0	1	>200	0
AvBD2	NC_006090.4	107910901	107913429	+	0	0	NA	0	0	0	0	1	NA	NA
AvBD3	NC_006090.4	107919467	107922010	-	0	0	NA	0	0	0	0	1	NA	NA
AvBD4	NC_006090.4	107928538	107930407	-	0	0	NA	0	0	0	0	1	NA	NA
AvBD5	NC_006090.4	107924843	107926246	-	0	0	NA	0	0	0	0	1	NA	NA
AvBD6	NC_006090.4	107904498	107906657	+	0	0	NA	0	0	0	0	1	NA	NA
AvBD7	NC_006090.4	107900662	107902267	+	0	0	NA	0	0	0	0	1	NA	NA
AvBD8	NC_006090.4	107895577	107898316	-	0	0	NA	0	0	0	0	1	NA	NA
AvBD9	NC_006090.4	107891531	107894588	+	0	0	NA	0	0	0	0	1	NA	NA
AVD	NC_006127.4	9164721	9165901	+	0	0	NA	0	0	0	0	1	NA	NA
AVDL	NC_006127.4	9136627	9137577	+	0	0	NA	0	0	0	0	1	NA	NA
AVP	NC_006091.4	89222770	89224343	-	0	0	NA	0	0	0	0	1	31	4.70734
AVPR1B	NC_006113.4	2366153	2368135	-	0	0	NA	0	0	0	0	1	>200	0
AVR2	NC_006127.4	9149077	9150126	+	0	0	NA	0	0	0	0	1	NA	NA
AZIN2	NC_006110.4	5343981	5350028	+	0	0	NA	0	0	0	0	1	NA	NA
B2M	NC_006097.4	1254766	1256770	+	0	0	NA	0	0	0	0	1	NA	NA
BABAM1	NC_006115.4	3399453	3402123	+	0	0	NA	0	0	0	0	1	NA	NA
BAG4	NC_006109.4	2295159	2298180	+	0	0	NA	0	0	0	0	1	14	3.91448
BAK1	NC_006113.4	4677808	4689669	+	0	0	NA	0	0	0	0	1	NA	NA
BCAN	NC_006112.3	1473720	1486466	+	0	0	NA	0	0	0	0	1	NA	NA
BCDIN3D	NC_008465.3	1391111	1416431	-	0	0	NA	0	0	0	0	1	NA	NA
BCL2L15	NC_006113.4	3760199	3762959	-	0	0	NA	0	0	0	0	1	NA	NA
BEST4	NC_006095.4	20844353	20848677	-	0	0	NA	0	0	0	0	1	>200	0
BET1L	NC_006092.4	1599696	1604031	+	0	0	NA	0	0	0	0	1	NA	NA
BET3L	NC_006090.4	63993335	64012996	+	0	0	NA	0	0	0	0	1	>200	0
BF1	NC_006103.4	87140	89907	-	0	0	NA	0	0	0	0	1	>200	0
BF2	NC_006103.4	73928	76131	+	0	0	NA	0	0	0	0	1	NA	NA
BG1	NC_006103.4	128548	133753	+	0	0	NA	0	0	0	0	1	NA	NA
BG2	NC_006103.4	245786	287816	-	0	0	NA	0	0	0	0	1	NA	NA
BG8	NC_006103.4	287966	294390	-	0	0	NA	0	0	0	0	1	NA	NA
BGLAP	NC_006112.3	594	1789	+	0	0	NA	0	0	0	0	1	NA	NA
BIN2	NC_008465.3	1556563	1565857	+	0	0	NA	0	0	0	0	1	NA	NA
BIRC5	NC_006090.4	15427658	15428791	-	0	0	NA	0	0	0	0	1	NA	NA
BLB1	NC_006103.4	116613	118450	+	0	0	NA	0	0	0	0	1	NA	NA
BLEC1	NC_006103.4	118439	122492	-	0	0	NA	0	0	0	0	1	NA	NA
BLEC2	NC_006103.4	122774	125266	+	0	0	NA	0	0	0	0	1	NA	NA
BLEC3	NC_006103.4	236033	240191	+	0	0	NA	0	0	0	0	1	NA	NA
BLM	NC_006097.4	19934474	19950517	-	0	0	NA	0	0	0	0	1	NA	NA
BMP15	NC_006091.4	1874383	1876926	+	0	0	NA	0	0	0	0	1	NA	NA
BNIP3	NC_006093.4	34844501	34850171	-	0	0	NA	0	0	0	0	1	NA	NA
BOLA3	NC_006109.4	2880062	2880858	+	0	0	NA	0	0	0	0	1	>200	0
BPIFB2	NC_006107.4	10498259	10504081	-	0	0	NA	0	0	0	0	1	NA	NA
BPIL3	NC_006107.4	10511898	10517383	+	0	0	NA	0	0	0	0	1	NA	NA
BRCA1	NC_006114.4	5572653	5593940	-	0	0	NA	0	0	0	0	1	>200	0
BRD2	NC_006103.4	100331	109182	+	0	0	NA	0	0	0	0	1	NA	NA
BRF2	NC_006109.4	2238375	2241315	-	0	0	NA	0	0	0	0	1	>200	0
BRICD5	NC_006101.4	6526710	6532006	-	0	0	NA	0	0	0	0	1	NA	NA
BSG	NC_006115.4	2698084	2709095	+	0	0	NA	0	0	0	0	1	>200	0
BSND	NC_006095.4	25354563	25356241	+	0	0	NA	0	0	0	0	1	NA	NA
BSPRY	NC_006104.4	1948591	1955597	-	0	0	NA	0	0	0	0	1	NA	NA
BTBD18	NC_006092.4	16967478	16974082	+	0	0	NA	0	0	0	0	1	NA	NA
BTBD19	NC_006095.4	20860529	20867777	+	0	0	NA	0	0	0	0	1	NA	NA
BTG3	NC_006099.4	3294363	3295333	+	0	0	NA	0	0	0	0	1	NA	NA
BTLA	NC_006088.4	88756373	88767923	-	0	0	NA	0	0	0	0	1	NA	NA
BTN1	NC_006103.4	139473	153697	-	0	0	NA	0	0	0	0	1	NA	NA
BTN1A1	NC_006115.4	790661	796192	-	0	0	NA	0	0	0	0	1	NA	NA
BTN2	NC_006103.4	135063	138990	-	0	0	NA	0	0	0	0	1	NA	NA
BTN3A2	NC_008466.3	546889	556171	-	0	0	NA	0	0	0	0	1	NA	NA
BTN3A3	NC_008466.3	418511	428266	-	0	0	NA	0	0	0	0	1	NA	NA
BUB1	NC_006090.4	3107192	3126954	+	0	0	NA	0	0	0	0	1	>200	0
BUD13	NC_006111.4	5093017	5099052	-	0	0	NA	0	0	0	0	1	NA	NA
BZFP1	NC_006103.4	216592	218965	+	0	0	NA	0	0	0	0	1	NA	NA
BZFP3	NC_006103.4	230596	237805	-	0	0	NA	0	0	0	0	1	NA	NA
C10H15orf39	NC_006097.4	2277417	2283623	-	0	0	NA	0	0	0	0	1	NA	NA
C10ORF122	NC_006093.4	32527889	32531663	-	0	0	NA	0	0	0	0	1	NA	NA
C10ORF65	NC_006093.4	22311260	22313728	-	0	0	NA	0	0	0	0	1	NA	NA
C11ORF31	NC_006092.4	16974079	16974902	-	0	0	NA	0	0	0	0	1	>200	0
C11ORF85	NC_006102.4	9954834	9964299	-	0	0	NA	0	0	0	0	1	NA	NA
C11ORF88	NC_006111.4	5538396	5542758	+	0	0	NA	0	0	0	0	1	NA	NA
C11ORF97	NC_006088.4	185683602	185688068	-	0	0	NA	0	0	0	0	1	NA	NA
C12ORF43	NC_006102.4	9144083	9168949	+	0	0	NA	0	0	0	0	1	NA	NA
C12ORF50	NC_006088.4	42781477	42795697	-	0	0	NA	0	0	0	0	1	NA	NA
C12ORF57	NC_006088.4	77325963	77327101	+	0	0	NA	0	0	0	0	1	>200	0
C13H5ORF45	NC_006100.4	13459451	13462830	+	0	0	NA	0	0	0	0	1	>200	0
C14H16ORF89	NC_006101.4	13432457	13439617	-	0	0	NA	0	0	0	0	1	NA	NA
C14ORF166B	NC_006102.4	10114717	10120892	+	0	0	NA	0	0	0	0	1	NA	NA
C15H22ORF39	NC_006102.4	664396	665462	-	0	0	NA	0	0	0	0	1	NA	NA
C15ORF43	NC_006097.4	1256788	1261026	+	0	0	NA	0	0	0	0	1	NA	NA
C17H9ORF114	NC_006104.4	5817076	5821752	-	0	0	NA	0	0	0	0	1	NA	NA
C17H9orf142	NC_006104.4	903452	905429	+	0	0	NA	0	0	0	0	1	NA	NA
C17H9ORF171	NC_006104.4	7003142	7055727	+	0	0	NA	0	0	0	0	1	NA	NA
C17H9ORF91	NC_006104.4	3013572	3023060	+	0	0	NA	0	0	0	0	1	>200	0
C17ORF64	NC_006106.4	8026361	8031479	-	0	0	NA	0	0	0	0	1	>200	0
C17ORF80	NC_006105.4	9087342	9090722	+	0	0	NA	0	0	0	0	1	NA	NA
C17ORF89	NC_006105.4	9347710	9348299	-	0	0	NA	0	0	0	0	1	NA	NA
C18H17ORF106	NC_006105.4	4638245	4642223	-	0	0	NA	0	0	0	0	1	NA	NA
C18H17ORF67	NC_006105.4	6330243	6336774	-	0	0	NA	0	0	0	0	1	NA	NA
C18ORF32	NC_006127.4	1081791	1085507	+	0	0	NA	0	0	0	0	1	NA	NA
C19ORF25	NC_006115.4	3244108	3245963	-	0	0	NA	0	0	0	0	1	NA	NA
C19ORF60	NC_006115.4	3898654	3900482	-	0	0	NA	0	0	0	0	1	>200	0
C19ORF71	NC_006115.4	1058708	1059855	-	0	0	NA	0	0	0	0	1	NA	NA
C1H12ORF40	NC_006088.4	15262877	15272992	-	0	0	NA	0	0	0	0	1	NA	NA
C1H12ORF69	NC_006088.4	48074763	48078317	+	0	0	NA	0	0	0	0	1	NA	NA
C1H12ORF73	NC_006088.4	54754183	54755463	+	0	0	NA	0	0	0	0	1	NA	NA
C1ORF106	NC_006113.4	1129914	1135327	-	0	0	NA	0	0	0	0	1	NA	NA
C1ORF131	NC_006090.4	40811558	40817972	-	0	0	NA	0	0	0	0	1	NA	NA
C1ORF186	NC_006113.4	2359875	2365357	+	0	0	NA	0	0	0	0	1	NA	NA
C1ORF35	NC_006089.4	2389803	2393287	+	0	0	NA	0	0	0	0	1	NA	NA
C1ORF74	NC_006113.4	3164808	3166054	-	0	0	NA	0	0	0	0	1	NA	NA
C1QBP	NC_006106.4	3402717	3406163	+	0	0	NA	0	0	0	0	1	>200	0
C1QC	NC_006108.4	6086542	6088270	-	0	0	NA	0	0	0	0	1	NA	NA
C1QL1	NC_006114.4	1479622	1487255	-	0	0	NA	0	0	0	0	1	17	4.66516
C2	NC_006110.4	1796696	1803210	-	0	0	NA	0	0	0	0	1	>200	0
C20ORF96	NC_006107.4	10177073	10184157	+	0	0	NA	0	0	0	0	1	NA	NA
C21H1orf233	NC_006108.4	2103318	2110572	+	0	0	NA	0	0	0	0	1	>200	0
C23H1ORF63	NC_006110.4	2399454	2404397	+	0	0	NA	0	0	0	0	1	>200	0
C24H11ORF1	NC_006111.4	6217129	6219007	-	0	0	NA	0	0	0	0	1	NA	NA
C25H1ORF43	NC_006112.3	2120011	2126177	-	0	0	NA	0	0	0	0	1	NA	NA
C26H1orf194	NC_006113.4	1137611	1142050	-	0	0	NA	0	0	0	0	1	NA	NA
C26H6ORF125	NC_006113.4	4615609	4620391	+	0	0	NA	0	0	0	0	1	>200	0
C26H6ORF132	NC_006113.4	3194643	3209887	+	0	0	NA	0	0	0	0	1	>200	0
C26H6ORF222	NC_006113.4	1521881	1526058	-	0	0	NA	0	0	0	0	1	NA	NA
C27H17ORF104	NC_006114.4	1374448	1390626	+	0	0	NA	0	0	0	0	1	NA	NA
C27H17ORF105	NC_006114.4	3483419	3485629	-	0	0	NA	0	0	0	0	1	NA	NA
C28H19ORF10	NC_006115.4	4948938	4953139	+	0	0	NA	0	0	0	0	1	>200	0
C2CD3	NC_006088.4	195749656	195812259	-	0	0	NA	0	0	0	0	1	NA	NA
C2H18ORF63	NC_006089.4	92228090	92240797	-	0	0	NA	0	0	0	0	1	NA	NA
C2ORF62	NC_006094.4	22679682	22682016	-	0	0	NA	0	0	0	0	1	NA	NA
C3H2ORF3	NC_006090.4	111258596	111276138	-	0	0	NA	0	0	0	0	1	NA	NA
C3H2ORF70	NC_006090.4	105704325	105707368	-	0	0	NA	0	0	0	0	1	NA	NA
C3H8ORF80	NC_006090.4	105551676	105562321	+	0	0	NA	0	0	0	0	1	NA	NA
C3ORF33	NC_006096.4	23065437	23069353	+	0	0	NA	0	0	0	0	1	NA	NA
C4	NC_006103.4	58543	72898	-	0	0	NA	0	0	0	0	1	NA	NA
C4H4orf46	NC_006091.4	22075372	22076774	-	0	0	NA	0	0	0	0	1	>200	0
C4ORF17	NC_006091.4	60380305	60398394	+	0	0	NA	0	0	0	0	1	NA	NA
C4ORF33	NC_006091.4	34283513	34288015	-	0	0	NA	0	0	0	0	1	>200	0
C5H15ORF57	NC_006092.4	860498	867675	-	0	0	NA	0	0	0	0	1	>200	0
C5H15ORF62	NC_006092.4	969387	971838	+	0	0	NA	0	0	0	0	1	>200	0
C6ORF165	NC_006090.4	76741592	76755977	-	0	0	NA	0	0	0	0	1	>200	0
C7ORF26	NC_006101.4	12372232	12378787	+	0	0	NA	0	0	0	0	1	>200	0
C7ORF49	NC_006088.4	47945075	47946471	+	0	0	NA	0	0	0	0	1	NA	NA
C8G	NC_006104.4	1003468	1007027	-	0	0	NA	0	0	0	0	1	NA	NA
C8H1ORF111	NC_006095.4	3843256	3844693	+	0	0	NA	0	0	0	0	1	NA	NA
C8H1ORF173	NC_006095.4	29708136	29729199	-	0	0	NA	0	0	0	0	1	>200	0
C8H1ORF177	NC_006095.4	25327607	25335146	+	0	0	NA	0	0	0	0	1	NA	NA
C8H1ORF210	NC_006095.4	19724113	19727517	-	0	0	NA	0	0	0	0	1	NA	NA
C9H2ORF72	NC_006096.4	15178767	15183752	+	0	0	NA	0	0	0	0	1	NA	NA
C9ORF116	NC_006104.4	8203399	8205887	-	0	0	NA	0	0	0	0	1	>200	0
CA14	NC_006112.3	2387380	2390854	+	0	0	NA	0	0	0	0	1	NA	NA
CABP2	NC_006092.4	380085	383546	+	0	0	NA	0	0	0	0	1	NA	NA
CACNB1	NC_006114.4	4521859	4534179	-	0	0	NA	0	0	0	0	1	11	5.09746
CAD	NC_006090.4	104970670	104982808	+	0	0	NA	0	0	0	0	1	NA	NA
CADM3	NC_006112.3	2483418	2499486	+	0	0	NA	0	0	0	0	1	NA	NA
CALB2	NC_006098.4	1547068	1551624	-	0	0	NA	0	0	0	0	1	NA	NA
CALCOCO2	NC_006114.4	3709693	3719291	+	0	0	NA	0	0	0	0	1	NA	NA
CALHM2	NC_006093.4	23637291	23640006	-	0	0	NA	0	0	0	0	1	NA	NA
CALII	NC_006104.4	996136	998567	-	0	0	NA	0	0	0	0	1	NA	NA
CAMK1	NC_006099.4	11499838	11503171	-	0	0	NA	0	0	0	0	1	NA	NA
CAMK2N1	NC_006108.4	4881803	4883541	-	0	0	NA	0	0	0	0	1	NA	NA
CARD8	NC_006102.4	10072621	10081550	-	0	0	NA	0	0	0	0	1	NA	NA
CASC1	NC_006088.4	67216190	67232542	-	0	0	NA	0	0	0	0	1	NA	NA
CASC5	NC_006092.4	877672	905904	+	0	0	NA	0	0	0	0	1	NA	NA
CASP18	NC_006094.4	11488696	11497198	+	0	0	NA	0	0	0	0	1	NA	NA
CASP9	NC_006108.4	4917473	4923749	+	0	0	NA	0	0	0	0	1	>200	0
CATH1	NC_006089.4	4024916	4026402	-	0	0	NA	0	0	0	0	1	NA	NA
CATH2	NC_006089.4	4020689	4022454	-	0	0	NA	0	0	0	0	1	NA	NA
CATH3	NC_006089.4	4018763	4020027	+	0	0	NA	0	0	0	0	1	NA	NA
CATHB1	NC_006089.4	4022675	4023803	-	0	0	NA	0	0	0	0	1	NA	NA
CBX5	NC_008465.3	1153046	1158566	-	0	0	NA	0	0	0	0	1	NA	NA
CBY1	NC_006088.4	50881482	50883895	-	0	0	NA	0	0	0	0	1	24	3.36442
CCBL1	NC_006104.4	5822020	5831373	-	0	0	NA	0	0	0	0	1	>200	0
CCDC101	NC_006095.4	29925932	29930196	+	0	0	NA	0	0	0	0	1	NA	NA
CCDC103	NC_006114.4	1458290	1462150	+	0	0	NA	0	0	0	0	1	109	2.93456
CCDC12	NC_006089.4	3843122	3876549	-	0	0	NA	0	0	0	0	1	NA	NA
CCDC121	NC_006089.4	149263374	149269436	+	0	0	NA	0	0	0	0	1	NA	NA
CCDC124	NC_006115.4	3352642	3361327	+	0	0	NA	0	0	0	0	1	>200	0
CCDC127	NC_006089.4	85957205	85962473	+	0	0	NA	0	0	0	0	1	20	3.55477
CCDC135	NC_006098.4	554972	567750	-	0	0	NA	0	0	0	0	1	NA	NA
CCDC137	NC_006105.4	9231373	9233121	-	0	0	NA	0	0	0	0	1	NA	NA
CCDC15	NC_006111.4	222845	238484	-	0	0	NA	0	0	0	0	1	NA	NA
CCDC157	NC_006102.4	10878457	10885810	-	0	0	NA	0	0	0	0	1	NA	NA
CCDC173	NC_006094.4	18698406	18705989	+	0	0	NA	0	0	0	0	1	NA	NA
CCDC180	NC_006104.4	7313958	7330946	-	0	0	NA	0	0	0	0	1	NA	NA
CCDC183	NC_006106.4	802583	807984	-	0	0	NA	0	0	0	0	1	NA	NA
CCDC25	NC_006090.4	105618969	105629872	+	0	0	NA	0	0	0	0	1	>200	0
CCDC28B	NC_006110.4	5179384	5181209	-	0	0	NA	0	0	0	0	1	NA	NA
CCDC30	NC_006108.4	6428543	6455513	-	0	0	NA	0	0	0	0	1	NA	NA
CCDC42B	NC_006102.4	9946519	9949396	+	0	0	NA	0	0	0	0	1	NA	NA
CCDC43	NC_006114.4	1391410	1399208	-	0	0	NA	0	0	0	0	1	NA	NA
CCDC56	NC_006114.4	5473589	5474238	-	0	0	NA	0	0	0	0	1	NA	NA
CCDC61	NC_006096.4	3427452	3430986	-	0	0	NA	0	0	0	0	1	NA	NA
CCDC69	NC_006100.4	13018234	13024993	+	0	0	NA	0	0	0	0	1	NA	NA
CCDC78	NC_006101.4	13240025	13254201	-	0	0	NA	0	0	0	0	1	NA	NA
CCDC96	NC_006091.4	80520254	80521667	-	0	0	NA	0	0	0	0	1	NA	NA
CCKBR	NC_006088.4	194456804	194459574	-	0	0	NA	0	0	0	0	1	NA	NA
CCL20	NC_006096.4	9539784	9541900	+	0	0	NA	0	0	0	0	1	NA	NA
CCL4	NC_006106.4	389456	391149	+	0	0	NA	0	0	0	0	1	NA	NA
CCL5	NC_006106.4	395344	396508	-	0	0	NA	0	0	0	0	1	NA	NA
CCLI10	NC_006106.4	4767082	4768217	+	0	0	NA	0	0	0	0	1	NA	NA
CCLI7	NC_006106.4	4772383	4773585	-	0	0	NA	0	0	0	0	1	NA	NA
CCLI8	NC_006106.4	4780017	4781224	-	0	0	NA	0	0	0	0	1	NA	NA
CCM2	NC_006089.4	4046401	4072393	-	0	0	NA	0	0	0	0	1	NA	NA
CCNB3	NC_006091.4	1848426	1851730	+	0	0	NA	0	0	0	0	1	NA	NA
CCND3	NC_006113.4	5030661	5069048	-	0	0	NA	0	0	0	0	1	NA	NA
CCNH	NC_006127.4	60998041	61007197	+	0	0	NA	0	0	0	0	1	NA	NA
CCNO	NC_006127.4	16730068	16732395	-	0	0	NA	0	0	0	0	1	NA	NA
CCR10	NC_006114.4	5422621	5427142	-	0	0	NA	0	0	0	0	1	NA	NA
CCR8	NC_006089.4	44530853	44534337	+	0	0	NA	0	0	0	0	1	NA	NA
CCR8L	NC_006089.4	42868342	42872913	-	0	0	NA	0	0	0	0	1	NA	NA
CCT3	NC_006112.3	33641	44203	-	0	0	NA	0	0	0	0	1	NA	NA
CCT7	NC_006091.4	90271997	90282062	-	0	0	NA	0	0	0	0	1	>200	0
CD14	NC_006100.4	953349	956129	+	0	0	NA	0	0	0	0	1	NA	NA
CD163L1	NC_006094.4	6898524	6901972	+	0	0	NA	0	0	0	0	1	NA	NA
CD1B	NC_006103.4	18083	20766	+	0	0	NA	0	0	0	0	1	NA	NA
CD1C	NC_006103.4	14372	17201	+	0	0	NA	0	0	0	0	1	NA	NA
CD200	NC_006088.4	88719536	88764174	+	0	0	NA	0	0	0	0	1	NA	NA
CD200R1L	NC_006088.4	83407475	83428864	+	0	0	NA	0	0	0	0	1	NA	NA
CD244	NC_006112.3	1285835	1293468	-	0	0	NA	0	0	0	0	1	NA	NA
CD276	NC_006097.4	2175583	2184171	+	0	0	NA	0	0	0	0	1	NA	NA
CD300A	NC_006105.4	10503933	10508384	-	0	0	NA	0	0	0	0	1	NA	NA
CD300L-S1	NC_006105.4	10510367	10511097	-	0	0	NA	0	0	0	0	1	NA	NA
CD300LF	NC_006105.4	10512092	10514976	-	0	0	NA	0	0	0	0	1	NA	NA
CD320	NC_006115.4	875618	881870	+	0	0	NA	0	0	0	0	1	>200	0
CD3D	NC_006111.4	5457626	5460103	-	0	0	NA	0	0	0	0	1	NA	NA
CD48	NC_006112.3	1282479	1284960	-	0	0	NA	0	0	0	0	1	NA	NA
CD5	NC_006092.4	25590	30465	+	0	0	NA	0	0	0	0	1	NA	NA
CD55	NC_006113.4	2652733	2657102	+	0	0	NA	0	0	0	0	1	NA	NA
CD59	NC_006092.4	18364993	18370836	-	0	0	NA	0	0	0	0	1	NA	NA
CD6	NC_006092.4	21988	24443	+	0	0	NA	0	0	0	0	1	NA	NA
CD72	NC_006127.4	9056705	9061172	-	0	0	NA	0	0	0	0	1	NA	NA
CD72AGL	NC_006127.4	9061573	9065015	+	0	0	NA	0	0	0	0	1	NA	NA
CD79B	NC_006114.4	1793525	1797961	-	0	0	NA	0	0	0	0	1	NA	NA
CD8B	NC_006091.4	86469040	86474132	-	0	0	NA	0	0	0	0	1	>200	0
CD93	NC_006090.4	3328455	3330821	+	0	0	NA	0	0	0	0	1	NA	NA
CDA	NC_006108.4	4890631	4896451	+	0	0	NA	0	0	0	0	1	NA	NA
CDC25A	NC_006089.4	569570	583776	+	0	0	NA	0	0	0	0	1	NA	NA
CDC26	NC_006104.4	1971559	1972040	+	0	0	NA	0	0	0	0	1	NA	NA
CDC42SE1	NC_006112.3	2642228	2645533	-	0	0	NA	0	0	0	0	1	NA	NA
CDH1	NC_006098.4	19114383	19123146	+	0	0	NA	0	0	0	0	1	NA	NA
CDH3	NC_006098.4	19107862	19113818	+	0	0	NA	0	0	0	0	1	NA	NA
CDHR4	NC_006099.4	2397760	2402948	-	0	0	NA	0	0	0	0	1	NA	NA
CDHR5	NC_006092.4	540070	552422	+	0	0	NA	0	0	0	0	1	NA	NA
CDK2	NC_008465.3	617930	620154	+	0	0	NA	0	0	0	0	1	NA	NA
CDK2AP2	NC_006092.4	383812	384900	+	0	0	NA	0	0	0	0	1	NA	NA
CDK5RAP3	NC_006114.4	4192066	4195013	-	0	0	NA	0	0	0	0	1	NA	NA
CDKN2A	NC_006127.4	78627024	78636973	-	0	0	NA	0	0	0	0	1	NA	NA
CDT1	NC_006098.4	18701940	18705724	+	0	0	NA	0	0	0	0	1	NA	NA
CEL	NC_006104.4	7248755	7254132	+	0	0	NA	0	0	0	0	1	>200	0
CELA1	NC_008465.3	1551514	1555793	+	0	0	NA	0	0	0	0	1	NA	NA
CELF3	NC_006112.3	2847235	2856792	-	0	0	NA	0	0	0	0	1	NA	NA
CELSR2	NC_006113.4	1155494	1176452	+	0	0	NA	0	0	0	0	1	NA	NA
CEND1	NC_006092.4	407746	424260	+	0	0	NA	0	0	0	0	1	9	5.08793
CENPA	NC_006103.4	56525	58449	-	0	0	NA	0	0	0	0	1	NA	NA
CENPC	NC_006091.4	51915866	51947805	-	0	0	NA	0	0	0	0	1	NA	NA
CENPH	NC_006127.4	21911043	21917215	+	0	0	NA	0	0	0	0	1	NA	NA
CENPK	NC_006127.4	20549119	20570590	-	0	0	NA	0	0	0	0	1	NA	NA
CENPL	NC_006095.4	5564260	5567030	-	0	0	NA	0	0	0	0	1	>200	0
CENPQ	NC_006090.4	109267112	109273971	-	0	0	NA	0	0	0	0	1	NA	NA
CENPT	NC_006098.4	925640	942458	-	0	0	NA	0	0	0	0	1	NA	NA
CEP131	NC_006105.4	9353137	9365425	+	0	0	NA	0	0	0	0	1	>200	0
CEP164	NC_006111.4	5245205	5288936	+	0	0	NA	0	0	0	0	1	>200	0
CEP19	NC_006096.4	4675168	4677899	+	0	0	NA	0	0	0	0	1	3	4.73417
CEP250	NC_006107.4	1217620	1251926	-	0	0	NA	0	0	0	0	1	NA	NA
CEP41	NC_006088.4	970622	978956	-	0	0	NA	0	0	0	0	1	NA	NA
CEP63	NC_006096.4	3662080	3680009	+	0	0	NA	0	0	0	0	1	NA	NA
CERS1	NC_006115.4	3746346	3757621	+	0	0	NA	0	0	0	0	1	NA	NA
CERS2L2	NC_006112.3	2627398	2631003	-	0	0	NA	0	0	0	0	1	NA	NA
CERS4	NC_006115.4	85944	140348	-	0	0	NA	0	0	0	0	1	NA	NA
CERS5	NC_008465.3	274258	292653	+	0	0	NA	0	0	0	0	1	NA	NA
CES1	NC_006098.4	11306224	11316904	-	0	0	NA	0	0	0	0	1	NA	NA
CETP	NC_006098.4	668620	674247	+	0	0	NA	0	0	0	0	1	NA	NA
CFAP126	NC_006112.3	2544123	2546852	+	0	0	NA	0	0	0	0	1	NA	NA
CFAP45	NC_006112.3	2529249	2539783	+	0	0	NA	0	0	0	0	1	NA	NA
CFHR2	NC_006095.4	2660715	2693356	-	0	0	NA	0	0	0	0	1	NA	NA
CGREF1	NC_006090.4	104954575	104956221	-	0	0	NA	0	0	0	0	1	NA	NA
CHAC2	NC_006090.4	3043831	3054943	-	0	0	NA	0	0	0	0	1	NA	NA
CHADL	NC_006088.4	49787779	49792445	+	0	0	NA	0	0	0	0	1	NA	NA
CHAT1	NC_006088.4	194829589	194831063	-	0	0	NA	0	0	0	0	1	NA	NA
CHCHD1	NC_006093.4	15918351	15920704	-	0	0	NA	0	0	0	0	1	NA	NA
CHDSD	NC_006089.4	3904637	3910039	+	0	0	NA	0	0	0	0	1	NA	NA
CHIA	NC_006113.4	5088647	5092767	-	0	0	NA	0	0	0	0	1	NA	NA
CHIA-M31	NC_006113.4	5081386	5086043	-	0	0	NA	0	0	0	0	1	NA	NA
CHMP3	NC_006091.4	86188545	86192518	-	0	0	NA	0	0	0	0	1	>200	0
CHPF2	NC_006089.4	124375	130244	-	0	0	NA	0	0	0	0	1	>200	0
CHRNA10	NC_006088.4	194820445	194824132	+	0	0	NA	0	0	0	0	1	NA	NA
CHRNA2	NC_006090.4	105513853	105518433	-	0	0	NA	0	0	0	0	1	>200	0
CHRNB2	NC_006112.3	1729683	1734479	+	0	0	NA	0	0	0	0	1	NA	NA
CHRND	NC_006096.4	15648682	15651873	+	0	0	NA	0	0	0	0	1	NA	NA
CHST14	NC_006092.4	830038	832563	+	0	0	NA	0	0	0	0	1	>200	0
CHST3	NC_006093.4	11977760	11985573	+	0	0	NA	0	0	0	0	1	NA	NA
CHST4	NC_006098.4	20088785	20104757	+	0	0	NA	0	0	0	0	1	NA	NA
CHTF18	NC_006101.4	6005683	6016988	-	0	0	NA	0	0	0	0	1	>200	0
CHTF8	NC_006098.4	19157119	19158772	-	0	0	NA	0	0	0	0	1	NA	NA
CHTOP	NC_006112.3	1847078	1853476	-	0	0	NA	0	0	0	0	1	NA	NA
CHURC1	NC_006092.4	306752	308462	-	0	0	NA	0	0	0	0	1	NA	NA
CIART	NC_006112.3	2384018	2386610	-	0	0	NA	0	0	0	0	1	NA	NA
CIB1	NC_006097.4	20071065	20073557	-	0	0	NA	0	0	0	0	1	NA	NA
CILP2	NC_006115.4	3455166	3462668	-	0	0	NA	0	0	0	0	1	NA	NA
CIRH1A	NC_006098.4	19158792	19163525	+	0	0	NA	0	0	0	0	1	NA	NA
CKAP2L	NC_006109.4	4609435	4616294	-	0	0	NA	0	0	0	0	1	NA	NA
CKLF	NC_006098.4	11595596	11598275	-	0	0	NA	0	0	0	0	1	NA	NA
CKS1B	NC_006112.3	1801177	1802314	+	0	0	NA	0	0	0	0	1	NA	NA
CL2	NC_006091.4	49948789	49949830	-	0	0	NA	0	0	0	0	1	NA	NA
CLCN5	NC_006091.4	9581749	9622089	+	0	0	NA	0	0	0	0	1	>200	0
CLDN12	NC_006089.4	21759741	21767184	+	0	0	NA	0	0	0	0	1	>200	0
CLDN19	NC_006108.4	6395167	6398938	+	0	0	NA	0	0	0	0	1	NA	NA
CLDN2	NC_006091.4	10991217	10993743	+	0	0	NA	0	0	0	0	1	>200	0
CLDN23	NC_006091.4	49904251	49905411	-	0	0	NA	0	0	0	0	1	NA	NA
CLDN25	NC_006111.4	4417342	4418932	+	0	0	NA	0	0	0	0	1	NA	NA
CLDN3	NC_006106.4	668451	670165	-	0	0	NA	0	0	0	0	1	NA	NA
CLDN4	NC_006106.4	674927	676915	+	0	0	NA	0	0	0	0	1	NA	NA
CLDN9	NC_006106.4	672699	679928	+	0	0	NA	0	0	0	0	1	NA	NA
CLEC18A	NC_006098.4	1251163	1255979	-	0	0	NA	0	0	0	0	1	NA	NA
CLEC3B	NC_006089.4	43249989	43256640	-	0	0	NA	0	0	0	0	1	>200	0
CLIC2	NC_006091.4	1837445	1842295	-	0	0	NA	0	0	0	0	1	>200	0
CLK2	NC_006112.3	2173878	2182893	-	0	0	NA	0	0	0	0	1	NA	NA
CLN6	NC_006097.4	19164334	19170698	-	0	0	NA	0	0	0	0	1	>200	0
CLPS	NC_006113.4	92231	92863	-	0	0	NA	0	0	0	0	1	NA	NA
CLRN3	NC_006093.4	33304815	33313926	-	0	0	NA	0	0	0	0	1	NA	NA
CLSPN	NC_006110.4	4239190	4252727	+	0	0	NA	0	0	0	0	1	>200	0
CLU	NC_006090.4	105645313	105652240	+	0	0	NA	0	0	0	0	1	NA	NA
CMC2	NC_006098.4	15578334	15588786	-	0	0	NA	0	0	0	0	1	>200	0
CMKLR1	NC_006102.4	6537157	6542732	-	0	0	NA	0	0	0	0	1	>200	0
CMTR2	NC_006098.4	1568598	1577949	+	0	0	NA	0	0	0	0	1	>200	0
CNGB1	NC_006098.4	504684	520374	+	0	0	NA	0	0	0	0	1	NA	NA
CNN2	NC_006115.4	2939716	2944150	-	0	0	NA	0	0	0	0	1	>200	0
CNPY2	NC_008465.3	754194	756467	-	0	0	NA	0	0	0	0	1	NA	NA
CNR2	NC_006110.4	5618838	5625484	-	0	0	NA	0	0	0	0	1	NA	NA
CNTF	NC_006092.4	16919058	16923178	-	0	0	NA	0	0	0	0	1	NA	NA
COG1	NC_006105.4	9070553	9079283	+	0	0	NA	0	0	0	0	1	NA	NA
COL6A6	NC_006089.4	41684309	41736332	+	0	0	NA	0	0	0	0	1	>200	0
COMMD2	NC_006096.4	23888213	23893137	+	0	0	NA	0	0	0	0	1	NA	NA
COMMD4	NC_006097.4	2568308	2570032	+	0	0	NA	0	0	0	0	1	NA	NA
COPA	NC_006112.3	1203325	1221735	-	0	0	NA	0	0	0	0	1	NA	NA
COPE	NC_006115.4	3739326	3744130	+	0	0	NA	0	0	0	0	1	NA	NA
COPZ1	NC_008465.3	1170805	1175018	+	0	0	NA	0	0	0	0	1	NA	NA
COQ10A	NC_008465.3	745155	747272	+	0	0	NA	0	0	0	0	1	NA	NA
COQ10B	NC_006094.4	10227701	10237708	+	0	0	NA	0	0	0	0	1	>200	0
COQ2	NC_006091.4	46749048	46757291	-	0	0	NA	0	0	0	0	1	>200	0
COQ4	NC_006104.4	5520026	5524492	-	0	0	NA	0	0	0	0	1	NA	NA
COQ7	NC_006101.4	8510065	8522669	-	0	0	NA	0	0	0	0	1	>200	0
COR1	NC_006092.4	1007045	1008001	+	0	0	NA	0	0	0	0	1	NA	NA
COR3	NC_006092.4	1002827	1003789	+	0	0	NA	0	0	0	0	1	NA	NA
COR4	NC_006092.4	235065	236003	-	0	0	NA	0	0	0	0	1	NA	NA
COR6	NC_006092.4	1344929	1345867	-	0	0	NA	0	0	0	0	1	NA	NA
COR7A	NC_006097.4	698949	699919	+	0	0	NA	0	0	0	0	1	NA	NA
COR8	NC_006092.4	228013	230486	+	0	0	NA	0	0	0	0	1	NA	NA
CORO2B	NC_006097.4	19230885	19258511	+	0	0	NA	0	0	0	0	1	9	4.75837
COX1	NC_001323.1	6645	8192	+	0	0	NA	0	0	0	0	1	NA	NA
COX14	NC_008465.3	293423	293953	-	0	0	NA	0	0	0	0	1	NA	NA
COX2	NC_001323.1	8331	9014	+	0	0	NA	0	0	0	0	1	NA	NA
COX3	NC_001323.1	9923	10706	+	0	0	NA	0	0	0	0	1	NA	NA
COX4I1	NC_006098.4	17841426	17845527	-	0	0	NA	0	0	0	0	1	NA	NA
CPA1	NC_006088.4	965365	969129	+	0	0	NA	0	0	0	0	1	NA	NA
CPA2	NC_006088.4	948988	958470	+	0	0	NA	0	0	0	0	1	NA	NA
CPA5	NC_006088.4	960181	964481	+	0	0	NA	0	0	0	0	1	NA	NA
CPSF4L	NC_006105.4	9090616	9093773	-	0	0	NA	0	0	0	0	1	>200	0
CPSF7	NC_006092.4	75499	82253	-	0	0	NA	0	0	0	0	1	>200	0
CR1L	NC_006113.4	2657673	2663382	+	0	0	NA	0	0	0	0	1	NA	NA
CRABP2	NC_006112.3	1448446	1451746	+	0	0	NA	0	0	0	0	1	NA	NA
CREB3	NC_006127.4	9167671	9172326	-	0	0	NA	0	0	0	0	1	NA	NA
CRELD1	NC_006099.4	11522990	11525962	+	0	0	NA	0	0	0	0	1	NA	NA
CRNN	NC_006112.3	1168202	1170459	+	0	0	NA	0	0	0	0	1	NA	NA
CROCC	NC_006108.4	4389760	4406980	+	0	0	NA	0	0	0	0	1	NA	NA
CRP	NC_006112.3	2502854	2503992	+	0	0	NA	0	0	0	0	1	NA	NA
CRTC2	NC_006112.3	2074821	2076284	-	0	0	NA	0	0	0	0	1	NA	NA
CRYBB2	NC_006102.4	7044235	7046383	+	0	0	NA	0	0	0	0	1	117	2.93817
CRYBB3	NC_006102.4	7040388	7042265	+	0	0	NA	0	0	0	0	1	NA	NA
CS	NC_008465.3	747510	753468	-	0	0	NA	0	0	0	0	1	NA	NA
CSF2	NC_006100.4	16801200	16803017	+	0	0	NA	0	0	0	0	1	NA	NA
CSRP3	NC_006092.4	1655626	1665607	-	0	0	NA	0	0	0	0	1	NA	NA
CSTA	NC_006088.4	76773164	76778186	-	0	0	NA	0	0	0	0	1	NA	NA
CTC-260F20.3	NC_006115.4	3468753	3469993	-	0	0	NA	0	0	0	0	1	NA	NA
CTC-360G5.8	NC_006119.3	8576	11822	-	0	0	NA	0	0	0	0	1	NA	NA
CTD-2370N5.3	NC_006106.4	9048010	9051565	+	0	0	NA	0	0	0	0	1	NA	NA
CTD-2510F5.6	NC_006106.4	7205295	7209962	+	0	0	NA	0	0	0	0	1	NA	NA
CTD-2521M24.10	NC_006115.4	3594539	3599799	-	0	0	NA	0	0	0	0	1	NA	NA
CTD-2561J22.3	NC_006089.4	468562	473091	+	0	0	NA	0	0	0	0	1	NA	NA
CTDSP1	NC_006094.4	22668064	22672409	-	0	0	NA	0	0	0	0	1	>200	0
CTHRC1	NC_006089.4	130013685	130018758	+	0	0	NA	0	0	0	0	1	NA	NA
CTRC	NC_006108.4	4924441	4926347	-	0	0	NA	0	0	0	0	1	NA	NA
CTSA	NC_006107.4	10729872	10733818	+	0	0	NA	0	0	0	0	1	>200	0
CTSB	NC_006090.4	107829340	107838426	-	0	0	NA	0	0	0	0	1	>200	0
CTSE	NC_006113.4	2355036	2358849	-	0	0	NA	0	0	0	0	1	NA	NA
CTSG	NC_006115.4	1270887	1272972	-	0	0	NA	0	0	0	0	1	NA	NA
CTSH	NC_006097.4	19950730	19956595	-	0	0	NA	0	0	0	0	1	NA	NA
CTSK	NC_006112.3	2586099	2589028	-	0	0	NA	0	0	0	0	1	NA	NA
CTSS	NC_006112.3	2580937	2585626	-	0	0	NA	0	0	0	0	1	NA	NA
CTU2	NC_006098.4	18677742	18681201	+	0	0	NA	0	0	0	0	1	NA	NA
CUTC	NC_006093.4	22085378	22089122	-	0	0	NA	0	0	0	0	1	>200	0
CWC25	NC_006114.4	4451015	4459377	-	0	0	NA	0	0	0	0	1	NA	NA
CX3CL1	NC_006098.4	831860	836141	+	0	0	NA	0	0	0	0	1	NA	NA
CXORF65	NC_006091.4	2407845	2409444	+	0	0	NA	0	0	0	0	1	NA	NA
CYB561A3	NC_006092.4	68098	71047	-	0	0	NA	0	0	0	0	1	NA	NA
CYP11A1	NC_006097.4	2491142	2495357	+	0	0	NA	0	0	0	0	1	>200	0
CYP1A1	NC_006097.4	2370952	2373966	-	0	0	NA	0	0	0	0	1	NA	NA
CYP1A4	NC_006097.4	2375758	2379383	+	0	0	NA	0	0	0	0	1	NA	NA
CYP1C1	NC_006092.4	918081	919817	+	0	0	NA	0	0	0	0	1	NA	NA
CYP21A2	NC_006103.4	52234	56078	-	0	0	NA	0	0	0	0	1	NA	NA
CYP2J2L2	NC_006095.4	26769704	26785602	-	0	0	NA	0	0	0	0	1	NA	NA
CYP2J2L3	NC_006095.4	26763424	26769328	-	0	0	NA	0	0	0	0	1	NA	NA
CYP2K1L	NC_006090.4	109249205	109255105	+	0	0	NA	0	0	0	0	1	NA	NA
CYSLTR1	NC_006091.4	1359605	1377014	-	0	0	NA	0	0	0	0	1	NA	NA
CYSRT1	NC_006104.4	1478485	1480224	+	0	0	NA	0	0	0	0	1	NA	NA
CYTB	NC_001323.1	14893	16035	+	0	0	NA	0	0	0	0	1	NA	NA
CYTH1	NC_006105.4	9870884	9885687	+	0	0	NA	0	0	0	0	1	>200	0
CYTIP	NC_006094.4	36407488	36425200	-	0	0	NA	0	0	0	0	1	NA	NA
CZH5ORF34	NC_006127.4	13710399	13721698	-	0	0	NA	0	0	0	0	1	NA	NA
CZH5ORF51	NC_006127.4	13273558	13276645	+	0	0	NA	0	0	0	0	1	NA	NA
DAD1	NC_006114.4	172289	175051	+	0	0	NA	0	0	0	0	1	NA	NA
DAK	NC_006092.4	63876	67762	+	0	0	NA	0	0	0	0	1	NA	NA
DAP3	NC_006112.3	2244309	2252717	+	0	0	NA	0	0	0	0	1	NA	NA
DBN1	NC_006100.4	10144882	10154243	-	0	0	NA	0	0	0	0	1	8	4.69014
DBNDD1	NC_006098.4	19093976	19096929	-	0	0	NA	0	0	0	0	1	NA	NA
DCAF10	NC_006127.4	81587559	81603275	+	0	0	NA	0	0	0	0	1	>200	0
DCAKD	NC_006114.4	1487314	1496666	-	0	0	NA	0	0	0	0	1	NA	NA
DCDC2B	NC_006110.4	5172372	5176891	-	0	0	NA	0	0	0	0	1	NA	NA
DCLRE1B	NC_006113.4	3770574	3773420	+	0	0	NA	0	0	0	0	1	NA	NA
DCLRE1C	NC_006088.4	7459373	7469951	-	0	0	NA	0	0	0	0	1	>200	0
DCTN5	NC_006101.4	6928897	6935672	+	0	0	NA	0	0	0	0	1	NA	NA
DDA1	NC_006115.4	3417152	3424399	+	0	0	NA	0	0	0	0	1	>200	0
DDEFL1	NC_006107.4	1161828	1184210	+	0	0	NA	0	0	0	0	1	>200	0
DDHD2	NC_006109.4	2299572	2308118	+	0	0	NA	0	0	0	0	1	57	2.88161
DDIT4	NC_006093.4	11458618	11460255	-	0	0	NA	0	0	0	0	1	>200	0
DDOST	NC_006108.4	6786841	6792467	+	0	0	NA	0	0	0	0	1	NA	NA
DDT	NC_006102.4	8167597	8170036	+	0	0	NA	0	0	0	0	1	NA	NA
DDX49	NC_006115.4	3733482	3739178	-	0	0	NA	0	0	0	0	1	NA	NA
DECR2	NC_006101.4	13060654	13066425	+	0	0	NA	0	0	0	0	1	NA	NA
DEDD	NC_006112.3	2883775	2893262	+	0	0	NA	0	0	0	0	1	NA	NA
DEF8	NC_006098.4	19089879	19093651	+	0	0	NA	0	0	0	0	1	NA	NA
DENND2D	NC_006113.4	1020208	1029242	+	0	0	NA	0	0	0	0	1	NA	NA
DES	NC_006094.4	22291232	22295700	-	0	0	NA	0	0	0	0	1	>200	0
DGAT2	NC_006088.4	194876307	194892518	-	0	0	NA	0	0	0	0	1	>200	0
DHH	NC_008465.3	566294	570957	-	0	0	NA	0	0	0	0	1	NA	NA
DHODH	NC_006098.4	19961317	19964798	-	0	0	NA	0	0	0	0	1	NA	NA
DHRS7B	NC_006101.4	4563309	4574392	-	0	0	NA	0	0	0	0	1	>200	0
DHRS9	NC_006094.4	18953770	18980282	-	0	0	NA	0	0	0	0	1	NA	NA
DHX58	NC_006114.4	5242809	5249758	-	0	0	NA	0	0	0	0	1	NA	NA
DIP2B	NC_008465.3	157492	219662	-	0	0	NA	0	0	0	0	1	NA	NA
DIRAS1	NC_006115.4	3287981	3290762	+	0	0	NA	0	0	0	0	1	NA	NA
DLL3	NC_006119.3	66132	67464	+	0	0	NA	0	0	0	0	1	NA	NA
DLX3	NC_006114.4	3205945	3211170	+	0	0	NA	0	0	0	0	1	>200	0
DMA	NC_006103.4	96322	99142	-	0	0	NA	0	0	0	0	1	NA	NA
DMB1	NC_006103.4	93874	96249	-	0	0	NA	0	0	0	0	1	NA	NA
DMB2	NC_006103.4	90602	93624	-	0	0	NA	0	0	0	0	1	NA	NA
DMBT1	NC_008466.3	719624	743917	-	0	0	NA	0	0	0	0	1	NA	NA
DMBT1L	NC_008466.3	637763	656293	-	0	0	NA	0	0	0	0	1	NA	NA
DMP1	NC_006091.4	45993555	45995776	-	0	0	NA	0	0	0	0	1	NA	NA
DNAI2	NC_006105.4	9203445	9209292	+	0	0	NA	0	0	0	0	1	NA	NA
DNAJB11	NC_006096.4	4355033	4367412	+	0	0	NA	0	0	0	0	1	NA	NA
DNAJB13	NC_006088.4	195741684	195746071	+	0	0	NA	0	0	0	0	1	NA	NA
DNAJB2	NC_006094.4	22314660	22319079	-	0	0	NA	0	0	0	0	1	30	3.15777
DNAJC17	NC_006092.4	968024	984334	-	0	0	NA	0	0	0	0	1	>200	0
DNAJC27	NC_006090.4	105879553	105885784	+	0	0	NA	0	0	0	0	1	NA	NA
DNAJC5G	NC_006090.4	104992527	105001561	-	0	0	NA	0	0	0	0	1	>200	0
DNAJC9	NC_006093.4	5213320	5216438	-	0	0	NA	0	0	0	0	1	NA	NA
DNALI1	NC_006110.4	3762522	3766217	-	0	0	NA	0	0	0	0	1	NA	NA
DNASE1	NC_006101.4	12361437	12371651	-	0	0	NA	0	0	0	0	1	NA	NA
DNASE2B	NC_006095.4	16665580	16687191	-	0	0	NA	0	0	0	0	1	>200	0
DND1	NC_006100.4	929522	932637	+	0	0	NA	0	0	0	0	1	NA	NA
DOHH	NC_006115.4	1078262	1081324	+	0	0	NA	0	0	0	0	1	NA	NA
DPEP1	NC_006098.4	18993512	18997373	+	0	0	NA	0	0	0	0	1	>200	0
DPH2	NC_006095.4	20432994	20435366	-	0	0	NA	0	0	0	0	1	NA	NA
DPY30	NC_006090.4	33746374	33750900	+	0	0	NA	0	0	0	0	1	>200	0
DRAM2	NC_006113.4	1055634	1065664	+	0	0	NA	0	0	0	0	1	NA	NA
DRC1	NC_006090.4	105784500	105796658	+	0	0	NA	0	0	0	0	1	NA	NA
DTX1	NC_006102.4	11252264	11259832	+	0	0	NA	0	0	0	0	1	NA	NA
DTX3L	NC_006094.4	28407324	28412717	-	0	0	NA	0	0	0	0	1	NA	NA
DTX4	NC_006092.4	16909749	16917682	-	0	0	NA	0	0	0	0	1	26	3.68627
DTYMK	NC_006096.4	4775858	4781321	+	0	0	NA	0	0	0	0	1	NA	NA
DUOXA1	NC_006097.4	955061	960620	+	0	0	NA	0	0	0	0	1	NA	NA
DUOXA1L	NC_006097.4	962730	970501	-	0	0	NA	0	0	0	0	1	NA	NA
DUSP12	NC_006088.4	79177407	79181322	+	0	0	NA	0	0	0	0	1	NA	NA
DUSP15	NC_006107.4	10270040	10276440	-	0	0	NA	0	0	0	0	1	NA	NA
DUSP18	NC_006102.4	10831576	10834553	+	0	0	NA	0	0	0	0	1	NA	NA
DUSP23	NC_006112.3	2506498	2509327	+	0	0	NA	0	0	0	0	1	NA	NA
DYDC1	NC_006093.4	4418064	4421743	+	0	0	NA	0	0	0	0	1	NA	NA
DYL1	NC_006102.4	9322891	9325425	-	0	0	NA	0	0	0	0	1	NA	NA
DYL2	NC_006102.4	9320183	9320918	-	0	0	NA	0	0	0	0	1	NA	NA
DYNLRB1	NC_006107.4	1437969	1443498	-	0	0	NA	0	0	0	0	1	NA	NA
DYRK3	NC_006113.4	2516254	2527342	+	0	0	NA	0	0	0	0	1	>200	0
E2F1	NC_006107.4	2252980	2256764	+	0	0	NA	0	0	0	0	1	>200	0
E2F2	NC_006110.4	2198435	2205630	-	0	0	NA	0	0	0	0	1	NA	NA
E2F4	NC_006098.4	1047693	1059629	+	0	0	NA	0	0	0	0	1	NA	NA
EARS2	NC_006101.4	6962073	6968875	+	0	0	NA	0	0	0	0	1	NA	NA
ECHS1	NC_006093.4	9406585	9408520	-	0	0	NA	0	0	0	0	1	NA	NA
ECI1	NC_006101.4	12356866	12361716	+	0	0	NA	0	0	0	0	1	NA	NA
EDC3	NC_006097.4	2380084	2405896	+	0	0	NA	0	0	0	0	1	>200	0
EFHD2	NC_006108.4	4926613	4929670	-	0	0	NA	0	0	0	0	1	NA	NA
EFR3B	NC_006090.4	105834607	105875555	-	0	0	NA	0	0	0	0	1	7	5.23806
EI24	NC_006111.4	387616	395692	-	0	0	NA	0	0	0	0	1	NA	NA
EIF3I	NC_006110.4	5166281	5170404	-	0	0	NA	0	0	0	0	1	NA	NA
EIF4E1B	NC_006100.4	10348594	10350545	-	0	0	NA	0	0	0	0	1	NA	NA
EIF4EBP1	NC_006109.4	2270656	2274964	+	0	0	NA	0	0	0	0	1	NA	NA
EIF4EBP2	NC_006093.4	11524822	11526449	+	0	0	NA	0	0	0	0	1	NA	NA
ELP6	NC_006089.4	853840	868907	+	0	0	NA	0	0	0	0	1	NA	NA
EMC8	NC_006098.4	17845679	17853183	+	0	0	NA	0	0	0	0	1	>200	0
EME1	NC_006105.4	10477044	10482014	-	0	0	NA	0	0	0	0	1	NA	NA
EME2	NC_006101.4	13276920	13284051	-	0	0	NA	0	0	0	0	1	NA	NA
EMID1	NC_006102.4	11240033	11249468	-	0	0	NA	0	0	0	0	1	NA	NA
ENDOU	NC_008465.3	480450	487215	+	0	0	NA	0	0	0	0	1	NA	NA
ENG	NC_006104.4	5421141	5429875	+	0	0	NA	0	0	0	0	1	>200	0
ENGASE	NC_006105.4	9838479	9842563	-	0	0	NA	0	0	0	0	1	NA	NA
ENOPH1	NC_006091.4	46716988	46720821	-	0	0	NA	0	0	0	0	1	NA	NA
ENSA	NC_006112.3	2324712	2328959	+	0	0	NA	0	0	0	0	1	NA	NA
ENTPD8	NC_006104.4	1406900	1417020	-	0	0	NA	0	0	0	0	1	NA	NA
ENTPD8L	NC_006104.4	1417020	1422064	+	0	0	NA	0	0	0	0	1	NA	NA
EPB42	NC_006107.4	6889050	6899216	+	0	0	NA	0	0	0	0	1	NA	NA
EPCAM	NC_006090.4	8650473	8655631	+	0	0	NA	0	0	0	0	1	NA	NA
EPHA2	NC_006108.4	4314377	4323442	-	0	0	NA	0	0	0	0	1	NA	NA
EPHX2	NC_006090.4	105527067	105535858	+	0	0	NA	0	0	0	0	1	NA	NA
EPS8L2	NC_006092.4	452493	493015	-	0	0	NA	0	0	0	0	1	>200	0
ERBB2	NC_006114.4	4653394	4662322	+	0	0	NA	0	0	0	0	1	NA	NA
ERBB3	NC_008465.3	646824	664496	+	0	0	NA	0	0	0	0	1	NA	NA
ERCC6L	NC_006091.4	1683237	1688825	+	0	0	NA	0	0	0	0	1	>200	0
ERMN	NC_006094.4	36399659	36407384	-	0	0	NA	0	0	0	0	1	NA	NA
ERN1	NC_006101.4	6942330	6951197	-	0	0	NA	0	0	0	0	1	>200	0
ESAM	NC_006111.4	288924	295625	+	0	0	NA	0	0	0	0	1	NA	NA
ESCO2	NC_006090.4	105604973	105618761	-	0	0	NA	0	0	0	0	1	NA	NA
ESPN	NC_006108.4	588543	600570	-	0	0	NA	0	0	0	0	1	>200	0
ESPNL	NC_006096.4	4817211	4821125	+	0	0	NA	0	0	0	0	1	NA	NA
ESYT1	NC_008465.3	679064	689197	+	0	0	NA	0	0	0	0	1	NA	NA
ETV3	NC_006112.3	1334908	1344750	+	0	0	NA	0	0	0	0	1	NA	NA
ETV3L	NC_006112.3	1353678	1355999	+	0	0	NA	0	0	0	0	1	NA	NA
ETV7	NC_006113.4	1528149	1533628	-	0	0	NA	0	0	0	0	1	NA	NA
EVI2B	NC_006106.4	9052604	9055130	+	0	0	NA	0	0	0	0	1	NA	NA
EXOC3L1	NC_006098.4	1038668	1047558	-	0	0	NA	0	0	0	0	1	>200	0
EXOSC1	NC_006093.4	22341311	22343062	+	0	0	NA	0	0	0	0	1	NA	NA
EXOSC6	NC_006098.4	1245356	1247632	+	0	0	NA	0	0	0	0	1	NA	NA
EXOSC9	NC_006091.4	54297841	54303087	-	0	0	NA	0	0	0	0	1	>200	0
F-KER	NC_006112.3	973471	980575	+	0	0	NA	0	0	0	0	1	NA	NA
F8A3	NC_006091.4	2129502	2130779	+	0	0	NA	0	0	0	0	1	NA	NA
FAAH2	NC_006091.4	1826075	1831089	+	0	0	NA	0	0	0	0	1	>200	0
FABP1	NC_006091.4	86531504	86535234	-	0	0	NA	0	0	0	0	1	NA	NA
FABP3	NC_006110.4	593610	596611	-	0	0	NA	0	0	0	0	1	NA	NA
FADS1	NC_006092.4	16758556	16770724	-	0	0	NA	0	0	0	0	1	>200	0
FAHD1	NC_006101.4	6077400	6078590	+	0	0	NA	0	0	0	0	1	NA	NA
FAIM2	NC_008465.3	1419360	1436059	-	0	0	NA	0	0	0	0	1	NA	NA
FAM109B	NC_006088.4	49456927	49462117	-	0	0	NA	0	0	0	0	1	>200	0
FAM110A	NC_006107.4	10104339	10108329	-	0	0	NA	0	0	0	0	1	>200	0
FAM110D	NC_006110.4	3204369	3210658	-	0	0	NA	0	0	0	0	1	NA	NA
FAM118B	NC_006111.4	407249	415529	-	0	0	NA	0	0	0	0	1	>200	0
FAM131A	NC_006096.4	15963382	15968178	+	0	0	NA	0	0	0	0	1	7	5.53928
FAM151B	NC_006127.4	64103419	64115420	-	0	0	NA	0	0	0	0	1	>200	0
FAM160A2	NC_006088.4	194465182	194472744	+	0	0	NA	0	0	0	0	1	NA	NA
FAM167B	NC_006110.4	5159870	5161525	-	0	0	NA	0	0	0	0	1	NA	NA
FAM189B	NC_006112.3	2163300	2168280	-	0	0	NA	0	0	0	0	1	NA	NA
FAM194A	NC_006096.4	23720895	23728690	+	0	0	NA	0	0	0	0	1	NA	NA
FAM207A	NC_006094.4	7184828	7238375	+	0	0	NA	0	0	0	0	1	>200	0
FAM208B	NC_006088.4	1062869	1110883	-	0	0	NA	0	0	0	0	1	NA	NA
FAM20A	NC_006105.4	7945152	7954650	-	0	0	NA	0	0	0	0	1	>200	0
FAM212A	NC_006099.4	2402627	2404973	+	0	0	NA	0	0	0	0	1	>200	0
FAM219B	NC_006097.4	2329347	2331939	+	0	0	NA	0	0	0	0	1	NA	NA
FAM229A	NC_006110.4	5206214	5207193	-	0	0	NA	0	0	0	0	1	NA	NA
FAM26D	NC_006090.4	63985127	63989478	-	0	0	NA	0	0	0	0	1	>200	0
FAM32A	NC_006115.4	4432161	4433312	-	0	0	NA	0	0	0	0	1	>200	0
FAM38A	NC_006098.4	18681139	18700645	-	0	0	NA	0	0	0	0	1	>200	0
FAM40B	NC_006088.4	758387	773884	+	0	0	NA	0	0	0	0	1	>200	0
FAM43B	NC_006108.4	4890083	4892310	-	0	0	NA	0	0	0	0	1	NA	NA
FAM64A	NC_006106.4	9906770	9915375	-	0	0	NA	0	0	0	0	1	NA	NA
FAM81B	NC_006127.4	57472031	57489951	-	0	0	NA	0	0	0	0	1	>200	0
FAM86A	NC_006101.4	13449797	13454228	-	0	0	NA	0	0	0	0	1	NA	NA
FAM96A	NC_006097.4	19754137	19758656	-	0	0	NA	0	0	0	0	1	NA	NA
FANCM	NC_006092.4	58868093	58927516	-	0	0	NA	0	0	0	0	1	>200	0
FARSA	NC_028739.1	15259	18129	+	0	0	NA	0	0	0	0	1	NA	NA
FASLG	NC_006095.4	4472169	4486857	-	0	0	NA	0	0	0	0	1	>200	0
FASTKD5	NC_006091.4	89236654	89243318	-	0	0	NA	0	0	0	0	1	NA	NA
FBLN7	NC_006090.4	3222727	3229162	+	0	0	NA	0	0	0	0	1	NA	NA
FBXO18	NC_006088.4	1020033	1044239	-	0	0	NA	0	0	0	0	1	NA	NA
FBXO42	NC_006108.4	4329871	4369312	-	0	0	NA	0	0	0	0	1	NA	NA
FBXO48	NC_006090.4	11366887	11369991	-	0	0	NA	0	0	0	0	1	>200	0
FBXW10	NC_006105.4	2275195	2286434	+	0	0	NA	0	0	0	0	1	NA	NA
FCER1G	NC_006112.3	2567666	2590029	+	0	0	NA	0	0	0	0	1	NA	NA
FCHO1	NC_006115.4	3338835	3340759	+	0	0	NA	0	0	0	0	1	NA	NA
FCHSD1	NC_006100.4	1929896	1935165	-	0	0	NA	0	0	0	0	1	29	3.36186
FCN2	NC_006104.4	762953	774604	+	0	0	NA	0	0	0	0	1	>200	0
FCRL2	NC_006112.3	2411309	2419676	-	0	0	NA	0	0	0	0	1	NA	NA
FDFT1	NC_006090.4	107816740	107827820	+	0	0	NA	0	0	0	0	1	NA	NA
FDPS	NC_006112.3	2170966	2195061	+	0	0	NA	0	0	0	0	1	NA	NA
FDXACB1	NC_006111.4	6219249	6224776	+	0	0	NA	0	0	0	0	1	NA	NA
FDXR	NC_006105.4	10608619	10618937	-	0	0	NA	0	0	0	0	1	>200	0
FES	NC_006097.4	20121659	20127462	-	0	0	NA	0	0	0	0	1	>200	0
FGF22	NC_006115.4	2738943	2743120	+	0	0	NA	0	0	0	0	1	NA	NA
FGFR4	NC_006100.4	10264029	10269337	-	0	0	NA	0	0	0	0	1	>200	0
FIGLA	NC_006109.4	3518613	3522914	+	0	0	NA	0	0	0	0	1	NA	NA
FIGNL2	NC_008465.3	57404	72620	+	0	0	NA	0	0	0	0	1	NA	NA
FK21	NC_006114.4	906726	907819	+	0	0	NA	0	0	0	0	1	NA	NA
FKBP3	NC_006092.4	58927548	58931707	+	0	0	NA	0	0	0	0	1	NA	NA
FKBP6	NC_006106.4	279467	299279	-	0	0	NA	0	0	0	0	1	NA	NA
FKBP8	NC_006115.4	3904304	3910021	+	0	0	NA	0	0	0	0	1	NA	NA
FLAD1	NC_006112.3	1802652	1808111	+	0	0	NA	0	0	0	0	1	NA	NA
FMO4	NC_006095.4	4812191	4817593	-	0	0	NA	0	0	0	0	1	NA	NA
FNTB	NC_006092.4	300359	303232	-	0	0	NA	0	0	0	0	1	NA	NA
FOLR1	NC_006088.4	194532747	194536214	-	0	0	NA	0	0	0	0	1	NA	NA
FOXRED1	NC_006111.4	396027	398737	-	0	0	NA	0	0	0	0	1	NA	NA
FOXS1	NC_006107.4	10262667	10264206	-	0	0	NA	0	0	0	0	1	>200	0
FP325317.1	NC_006127.4	7120110	7141487	-	0	0	NA	0	0	0	0	1	NA	NA
FSCN2	NC_006105.4	9275715	9278504	-	0	0	NA	0	0	0	0	1	NA	NA
FTH1	NC_006092.4	16832238	16836802	-	0	0	NA	0	0	0	0	1	NA	NA
FTSJ3	NC_006114.4	1865251	1872134	-	0	0	NA	0	0	0	0	1	>200	0
FUCA1	NC_006110.4	5614061	5618742	-	0	0	NA	0	0	0	0	1	>200	0
FUT7	NC_006104.4	944155	947873	+	0	0	NA	0	0	0	0	1	NA	NA
FZD2	NC_006114.4	1671844	1673876	-	0	0	NA	0	0	0	0	1	NA	NA
GADD45A	NC_006095.4	28789152	28790038	+	0	0	NA	0	0	0	0	1	NA	NA
GADD45GIP1	NC_028739.1	5835	7189	+	0	0	NA	0	0	0	0	1	NA	NA
GAL3ST2	NC_006096.4	4749643	4754097	-	0	0	NA	0	0	0	0	1	NA	NA
GAL3ST4	NC_006096.4	4617375	4623570	+	0	0	NA	0	0	0	0	1	NA	NA
GALE	NC_006110.4	5606417	5609867	-	0	0	NA	0	0	0	0	1	NA	NA
GALK1	NC_006105.4	4772526	4775721	+	0	0	NA	0	0	0	0	1	NA	NA
GALNT6	NC_008465.3	1512096	1532006	+	0	0	NA	0	0	0	0	1	NA	NA
GALR2	NC_006105.4	4574940	4576977	-	0	0	NA	0	0	0	0	1	NA	NA
GAS2L2	NC_006106.4	4351984	4358572	+	0	0	NA	0	0	0	0	1	58	3.76504
GBGT1	NC_006104.4	7305762	7312958	-	0	0	NA	0	0	0	0	1	NA	NA
GBP	NC_006099.4	2262152	2264784	-	0	0	NA	0	0	0	0	1	NA	NA
GCC1	NC_006088.4	463906	468791	+	0	0	NA	0	0	0	0	1	NA	NA
GCDH	NC_028739.1	21369	24682	-	0	0	NA	0	0	0	0	1	NA	NA
GCGR	NC_006105.4	9992516	10000986	+	0	0	NA	0	0	0	0	1	NA	NA
GCHFR	NC_006092.4	960122	967805	+	0	0	NA	0	0	0	0	1	NA	NA
GCM2	NC_006089.4	63420678	63425734	+	0	0	NA	0	0	0	0	1	>200	0
GDE1	NC_006101.4	8559889	8572219	-	0	0	NA	0	0	0	0	1	NA	NA
GDF3	NC_006115.4	3758241	3760332	+	0	0	NA	0	0	0	0	1	>200	0
GDF9	NC_006100.4	17156641	17159347	+	0	0	NA	0	0	0	0	1	>200	0
GDPGP1	NC_006097.4	20073523	20074930	+	0	0	NA	0	0	0	0	1	NA	NA
GEMIN6	NC_006090.4	16545501	16547754	+	0	0	NA	0	0	0	0	1	NA	NA
GFAP	NC_006114.4	1465510	1470250	-	0	0	NA	0	0	0	0	1	NA	NA
GFER	NC_006101.4	6204650	6210020	+	0	0	NA	0	0	0	0	1	>200	0
GFPT1	NC_006109.4	117420	146643	+	0	0	NA	0	0	0	0	1	>200	0
GGCL1	NC_006106.4	370698	371713	+	0	0	NA	0	0	0	0	1	NA	NA
GGT7	NC_006107.4	502736	519430	+	0	0	NA	0	0	0	0	1	NA	NA
GH	NC_006114.4	1787635	1791141	-	0	0	NA	0	0	0	0	1	NA	NA
GHRL	NC_006099.4	19487111	19491387	-	0	0	NA	0	0	0	0	1	NA	NA
GIMAP1	NC_006089.4	447203	453817	+	0	0	NA	0	0	0	0	1	NA	NA
GIP	NC_006114.4	3682114	3689763	+	0	0	NA	0	0	0	0	1	NA	NA
GIT1	NC_006106.4	6062139	6069941	-	0	0	NA	0	0	0	0	1	7	4.65923
GJB3	NC_006110.4	4463703	4470128	-	0	0	NA	0	0	0	0	1	>200	0
GKN1	NC_006109.4	251940	256605	-	0	0	NA	0	0	0	0	1	NA	NA
GLB1L	NC_006094.4	22332707	22336891	+	0	0	NA	0	0	0	0	1	NA	NA
GLE1	NC_006104.4	5666441	5675608	+	0	0	NA	0	0	0	0	1	NA	NA
GLIPR1	NC_006088.4	37790678	37796472	+	0	0	NA	0	0	0	0	1	NA	NA
GLIPR1L	NC_006088.4	37799926	37807898	+	0	0	NA	0	0	0	0	1	NA	NA
GLMP	NC_006112.3	27661	31956	-	0	0	NA	0	0	0	0	1	NA	NA
GLRX	NC_006127.4	57343858	57352243	+	0	0	NA	0	0	0	0	1	NA	NA
GLTPD1	NC_006108.4	2333497	2335758	-	0	0	NA	0	0	0	0	1	NA	NA
GM2A	NC_006100.4	13010716	13014544	-	0	0	NA	0	0	0	0	1	NA	NA
GNAT1	NC_006099.4	3189935	3192645	+	0	0	NA	0	0	0	0	1	>200	0
GNB2L1	NC_006103.4	153729	157192	+	0	0	NA	0	0	0	0	1	NA	NA
GNG12	NC_006095.4	28792533	28811079	-	0	0	NA	0	0	0	0	1	NA	NA
GNG13	NC_006101.4	6000462	6005707	+	0	0	NA	0	0	0	0	1	NA	NA
GNGT2	NC_006114.4	3637559	3639810	+	0	0	NA	0	0	0	0	1	NA	NA
GNLY	NC_006109.4	4711546	4712974	-	0	0	NA	0	0	0	0	1	NA	NA
GNOT2	NC_006091.4	90306516	90308562	-	0	0	NA	0	0	0	0	1	>200	0
GNRH1	NC_006109.4	835870	838873	+	0	0	NA	0	0	0	0	1	161	2.82041
GNRHR	NC_006097.4	20012994	20015302	-	0	0	NA	0	0	0	0	1	NA	NA
GOLGA7B	NC_006093.4	22281089	22286907	-	0	0	NA	0	0	0	0	1	4	5.84401
GOLM1	NC_006127.4	40764318	40801203	-	0	0	NA	0	0	0	0	1	132	2.34502
GOLPH3L	NC_006112.3	2306717	2324088	+	0	0	NA	0	0	0	0	1	NA	NA
GON4L	NC_006112.3	2256355	2276509	-	0	0	NA	0	0	0	0	1	NA	NA
GP1BA	NC_006115.4	786285	790539	-	0	0	NA	0	0	0	0	1	NA	NA
GPA33	NC_006088.4	91809973	91819665	+	0	0	NA	0	0	0	0	1	NA	NA
GPATCH3	NC_006110.4	1831568	1836134	-	0	0	NA	0	0	0	0	1	>200	0
GPATCH4	NC_006112.3	227411	231838	-	0	0	NA	0	0	0	0	1	NA	NA
GPN2	NC_006110.4	1826034	1830940	-	0	0	NA	0	0	0	0	1	>200	0
GPR114	NC_006098.4	589232	593558	-	0	0	NA	0	0	0	0	1	NA	NA
GPR124	NC_006109.4	2219245	2238469	+	0	0	NA	0	0	0	0	1	>200	0
GPR128	NC_006088.4	84935359	84959787	+	0	0	NA	0	0	0	0	1	NA	NA
GPR171	NC_006096.4	23665062	23668072	+	0	0	NA	0	0	0	0	1	NA	NA
GPR174	NC_006091.4	1468241	1474099	+	0	0	NA	0	0	0	0	1	NA	NA
GPR182	NC_008465.3	1599220	1601999	-	0	0	NA	0	0	0	0	1	NA	NA
GPR25	NC_006102.4	9964521	9965660	+	0	0	NA	0	0	0	0	1	NA	NA
GPR55	NC_006096.4	5352846	5357792	+	0	0	NA	0	0	0	0	1	NA	NA
GPR61	NC_006113.4	1227225	1229528	+	0	0	NA	0	0	0	0	1	NA	NA
GPR75	NC_006090.4	3016239	3019575	+	0	0	NA	0	0	0	0	1	8	4.801
GPR83	NC_006088.4	185714669	185717617	+	0	0	NA	0	0	0	0	1	NA	NA
GPR87	NC_006096.4	23636291	23648142	+	0	0	NA	0	0	0	0	1	NA	NA
GPRC5C	NC_006105.4	9223122	9229778	+	0	0	NA	0	0	0	0	1	NA	NA
GPX2	NC_006092.4	305528	306315	+	0	0	NA	0	0	0	0	1	NA	NA
GPX3	NC_006100.4	13057890	13059882	-	0	0	NA	0	0	0	0	1	NA	NA
GPX4	NC_006115.4	2960251	2961824	+	0	0	NA	0	0	0	0	1	NA	NA
GRAP	NC_006101.4	5192894	5196760	-	0	0	NA	0	0	0	0	1	NA	NA
GRASP	NC_008465.3	1615	6822	-	0	0	NA	0	0	0	0	1	NA	NA
GSDMA	NC_006114.4	4725470	4730952	+	0	0	NA	0	0	0	0	1	NA	NA
GSR	NC_006091.4	34885412	34889699	-	0	0	NA	0	0	0	0	1	NA	NA
GSTA3	NC_006090.4	88742990	88748682	+	0	0	NA	0	0	0	0	1	NA	NA
GSTT1L	NC_006102.4	8146405	8151715	+	0	0	NA	0	0	0	0	1	NA	NA
GTF3C2	NC_006090.4	105013225	105019514	-	0	0	NA	0	0	0	0	1	>200	0
GTPBP3	NC_006115.4	3439299	3442417	+	0	0	NA	0	0	0	0	1	NA	NA
GTPBP8	NC_006088.4	83401658	83406063	-	0	0	NA	0	0	0	0	1	NA	NA
GTSF1	NC_006114.4	1212080	1223350	+	0	0	NA	0	0	0	0	1	NA	NA
GUCA1A	NC_006113.4	3184463	3188865	-	0	0	NA	0	0	0	0	1	NA	NA
GVIN1	NC_006090.4	105438182	105453002	-	0	0	NA	0	0	0	0	1	NA	NA
GZMA	NC_006127.4	16662049	16666243	+	0	0	NA	0	0	0	0	1	NA	NA
GZMK	NC_006127.4	16649066	16655180	-	0	0	NA	0	0	0	0	1	NA	NA
GZMM	NC_006115.4	3241575	3244013	-	0	0	NA	0	0	0	0	1	NA	NA
H1F0	NC_006088.4	51162384	51168489	-	0	0	NA	0	0	0	0	1	NA	NA
H2AFX	NC_006111.4	35438	36324	+	0	0	NA	0	0	0	0	1	NA	NA
HAGHL	NC_006101.4	6063952	6067656	-	0	0	NA	0	0	0	0	1	12	4.81224
HAPLN2	NC_006112.3	1487083	1489801	-	0	0	NA	0	0	0	0	1	NA	NA
HAUS1	NC_006127.4	2139209	2151314	-	0	0	NA	0	0	0	0	1	NA	NA
HAUS2	NC_006092.4	25732816	25737538	+	0	0	NA	0	0	0	0	1	>200	0
HAX1	NC_006112.3	2148978	2150830	+	0	0	NA	0	0	0	0	1	NA	NA
HBAA	NC_006101.4	12163648	12164434	+	0	0	NA	0	0	0	0	1	NA	NA
HBAD	NC_006101.4	12160643	12161477	+	0	0	NA	0	0	0	0	1	NA	NA
HBE1	NC_006088.4	194567561	194568769	+	0	0	NA	0	0	0	0	1	NA	NA
HBG1	NC_006088.4	194562710	194563900	+	0	0	NA	0	0	0	0	1	NA	NA
HBG2	NC_006088.4	194570614	194572116	+	0	0	NA	0	0	0	0	1	NA	NA
HCN2	NC_006115.4	2711412	2723944	+	0	0	NA	0	0	0	0	1	11	4.74093
HCRT	NC_006114.4	5280135	5281806	-	0	0	NA	0	0	0	0	1	NA	NA
HDAC7	NC_008465.3	362208	425004	+	0	0	NA	0	0	0	0	1	NA	NA
HDGF	NC_006112.3	1432110	1437580	+	0	0	NA	0	0	0	0	1	NA	NA
HDGFRP2	NC_006115.4	2553366	2564109	+	0	0	NA	0	0	0	0	1	NA	NA
HEMGN	NC_006127.4	70663562	70668333	+	0	0	NA	0	0	0	0	1	NA	NA
HEP21	NC_006103.4	189369	190877	+	0	0	NA	0	0	0	0	1	NA	NA
HEXIM1	NC_006114.4	1524202	1525506	+	0	0	NA	0	0	0	0	1	NA	NA
HGS	NC_006105.4	9972905	9982349	+	0	0	NA	0	0	0	0	1	>200	0
HIGD2A	NC_006100.4	10415325	10415946	-	0	0	NA	0	0	0	0	1	NA	NA
HINFP	NC_006111.4	4284423	4288830	-	0	0	NA	0	0	0	0	1	>200	0
HINT2	NC_006127.4	9092459	9093516	+	0	0	NA	0	0	0	0	1	NA	NA
HIST1H103	NC_006088.4	48153694	48154400	-	0	0	NA	0	0	0	0	1	NA	NA
HIST1H111L	NC_006088.4	48192414	48193183	+	0	0	NA	0	0	0	0	1	NA	NA
HIST1H111R	NC_006088.4	48200667	48201409	-	0	0	NA	0	0	0	0	1	NA	NA
HIST1H2A4	NC_006088.4	48161484	48161873	-	0	0	NA	0	0	0	0	1	NA	NA
HIST1H2A4L1	NC_006088.4	48163679	48164794	+	0	0	NA	0	0	0	0	1	NA	NA
HIST1H2A4L2	NC_006088.4	48183522	48184054	-	0	0	NA	0	0	0	0	1	>200	0
HIST1H2A4L3	NC_006088.4	48193618	48194202	-	0	0	NA	0	0	0	0	1	NA	NA
HIST1H2A4L4	NC_006088.4	48199713	48200310	+	0	0	NA	0	0	0	0	1	>200	0
HIST1H2B5	NC_006088.4	48194516	48194896	+	0	0	NA	0	0	0	0	1	NA	NA
HIST1H2B7	NC_006088.4	48095494	48095874	-	0	0	NA	0	0	0	0	1	NA	NA
HIST1H2BF	NC_006088.4	48126151	48126917	+	0	0	NA	0	0	0	0	1	NA	NA
HIST1H2BO	NC_006088.4	48184065	48184819	+	0	0	NA	0	0	0	0	1	NA	NA
HIST1H3A	NC_006088.4	48145315	48145838	-	0	0	NA	0	0	0	0	1	>200	0
HIST1H3H	NC_006088.4	48196308	48197147	+	0	0	NA	0	0	0	0	1	>200	0
HIST1H46	NC_006088.4	48120731	48121042	-	0	0	NA	0	0	0	0	1	NA	NA
HIST1H46L2	NC_006088.4	48102824	48103259	-	0	0	NA	0	0	0	0	1	NA	NA
HIST1H46L4	NC_006088.4	48147224	48147887	-	0	0	NA	0	0	0	0	1	NA	NA
HIST1H46L6	NC_006088.4	48165623	48166048	-	0	0	NA	0	0	0	0	1	NA	NA
HIST1H4A	NC_006088.4	48140182	48160598	+	0	0	NA	0	0	0	0	1	NA	NA
HIST1H4D	NC_006088.4	48099152	48099715	+	0	0	NA	0	0	0	0	1	NA	NA
HIST2H4B	NC_006088.4	48119243	48119554	+	0	0	NA	0	0	0	0	1	NA	NA
HMGCL	NC_006110.4	5610015	5613638	-	0	0	NA	0	0	0	0	1	NA	NA
HMGCS2	NC_006095.4	4260404	4264197	+	0	0	NA	0	0	0	0	1	NA	NA
HMMR	NC_006100.4	6717402	6730736	-	0	0	NA	0	0	0	0	1	NA	NA
HNRNPA1	NC_008465.3	1158748	1165042	+	0	0	NA	0	0	0	0	1	NA	NA
HOMER3	NC_006115.4	3691573	3728986	+	0	0	NA	0	0	0	0	1	NA	NA
HOXC11	NC_008465.3	1004346	1008725	+	0	0	NA	0	0	0	0	1	NA	NA
HOXC12	NC_008465.3	985442	990294	+	0	0	NA	0	0	0	0	1	NA	NA
HOXC13	NC_008465.3	972468	976436	+	0	0	NA	0	0	0	0	1	NA	NA
HOXC4	NC_008465.3	1095082	1096703	+	0	0	NA	0	0	0	0	1	NA	NA
HOXC5	NC_008465.3	1074014	1076030	+	0	0	NA	0	0	0	0	1	NA	NA
HOXC6	NC_008465.3	1068066	1070320	+	0	0	NA	0	0	0	0	1	NA	NA
HOXC8	NC_008465.3	1045439	1048859	+	0	0	NA	0	0	0	0	1	NA	NA
HOXC9	NC_008465.3	1034458	1037322	+	0	0	NA	0	0	0	0	1	NA	NA
HPS4	NC_006102.4	7193051	7204799	-	0	0	NA	0	0	0	0	1	NA	NA
HPSE	NC_006091.4	46759039	46763458	-	0	0	NA	0	0	0	0	1	NA	NA
HPX	NC_006088.4	194439303	194442899	+	0	0	NA	0	0	0	0	1	NA	NA
HRASLS	NC_006096.4	13174440	13177303	-	0	0	NA	0	0	0	0	1	NA	NA
HRH4	NC_006089.4	103693237	103700889	+	0	0	NA	0	0	0	0	1	NA	NA
HSBP1L1	NC_006089.4	56354629	56360110	-	0	0	NA	0	0	0	0	1	NA	NA
HSCB	NC_006102.4	7738915	7741866	+	0	0	NA	0	0	0	0	1	NA	NA
HSD11B1b	NC_006113.4	3150966	3153883	+	0	0	NA	0	0	0	0	1	NA	NA
HSD17B1	NC_006114.4	5384880	5386410	+	0	0	NA	0	0	0	0	1	NA	NA
HSD17B11	NC_006091.4	46033783	46038936	+	0	0	NA	0	0	0	0	1	NA	NA
HSD17B7	NC_006095.4	3807434	3813304	-	0	0	NA	0	0	0	0	1	>200	0
HSP25	NC_006114.4	5258006	5258998	+	0	0	NA	0	0	0	0	1	>200	0
HSPA12B	NC_006088.4	49192326	49207249	-	0	0	NA	0	0	0	0	1	NA	NA
HSPB2	NC_006111.4	6209198	6214308	-	0	0	NA	0	0	0	0	1	NA	NA
HSPB7	NC_006108.4	4306444	4308055	-	0	0	NA	0	0	0	0	1	NA	NA
HSPE1	NC_006094.4	10249183	10253527	+	0	0	NA	0	0	0	0	1	>200	0
HSPG2	NC_006108.4	6549966	6578063	+	0	0	NA	0	0	0	0	1	NA	NA
HTATIP2	NC_006095.4	3703731	3706445	-	0	0	NA	0	0	0	0	1	NA	NA
HYAL1	NC_006099.4	1444891	1447406	-	0	0	NA	0	0	0	0	1	NA	NA
HYAL3	NC_006099.4	3231806	3235046	-	0	0	NA	0	0	0	0	1	>200	0
HYKK	NC_006097.4	3590679	3595638	-	0	0	NA	0	0	0	0	1	NA	NA
HYLS1	NC_006111.4	312146	318132	+	0	0	NA	0	0	0	0	1	NA	NA
HYPK	NC_006097.4	20149385	20150401	-	0	0	NA	0	0	0	0	1	NA	NA
IBA57	NC_006089.4	2332061	2336523	-	0	0	NA	0	0	0	0	1	NA	NA
IBSP	NC_006091.4	45990272	45991492	-	0	0	NA	0	0	0	0	1	NA	NA
ICMT	NC_006108.4	614975	617908	+	0	0	NA	0	0	0	0	1	NA	NA
ID1	NC_006107.4	10208269	10209010	+	0	0	NA	0	0	0	0	1	>200	0
ID3	NC_006110.4	2211780	2213056	-	0	0	NA	0	0	0	0	1	NA	NA
IDH2	NC_006097.4	20053596	20056916	-	0	0	NA	0	0	0	0	1	NA	NA
IDI1	NC_006089.4	10422464	10427557	-	0	0	NA	0	0	0	0	1	>200	0
IFIT5	NC_006093.4	19356981	19360732	+	0	0	NA	0	0	0	0	1	NA	NA
IFITM5	NC_006092.4	1556571	1558140	+	0	0	NA	0	0	0	0	1	NA	NA
IFNA3	NC_006127.4	7395300	7396062	+	0	0	NA	0	0	0	0	1	NA	NA
IFNAR1	NC_006088.4	105271218	105290008	+	0	0	NA	0	0	0	0	1	NA	NA
IFNGR2	NC_006088.4	105302731	105311193	+	0	0	NA	0	0	0	0	1	NA	NA
IFT20	NC_006106.4	9325233	9327407	-	0	0	NA	0	0	0	0	1	NA	NA
IFT46	NC_006111.4	5483681	5488408	+	0	0	NA	0	0	0	0	1	NA	NA
IGBP1	NC_006091.4	1226534	1231592	+	0	0	NA	0	0	0	0	1	NA	NA
IGFN1	NC_006113.4	859758	899958	-	0	0	NA	0	0	0	0	1	NA	NA
IGHMBP2	NC_006092.4	1408796	1447128	+	0	0	NA	0	0	0	0	1	NA	NA
IGJ	NC_006091.4	50344974	50350742	-	0	0	NA	0	0	0	0	1	NA	NA
IGLL1	NC_006102.4	7973416	7978057	-	0	0	NA	0	0	0	0	1	NA	NA
IGSF1	NC_006107.4	64217	68732	+	0	0	NA	0	0	0	0	1	NA	NA
IGSF9	NC_006112.3	2510347	2528542	+	0	0	NA	0	0	0	0	1	NA	NA
IKZF4	NC_008465.3	630411	642769	+	0	0	NA	0	0	0	0	1	NA	NA
IL12RB1	NC_006115.4	4053608	4056034	+	0	0	NA	0	0	0	0	1	>200	0
IL15RA	NC_006088.4	1014169	1019145	+	0	0	NA	0	0	0	0	1	NA	NA
IL17A	NC_006090.4	108025080	108027181	-	0	0	NA	0	0	0	0	1	NA	NA
IL17F	NC_006090.4	108015811	108018872	+	0	0	NA	0	0	0	0	1	NA	NA
IL18	NC_006111.4	6137941	6145530	+	0	0	NA	0	0	0	0	1	NA	NA
IL18BP	NC_006088.4	194212591	194214477	-	0	0	NA	0	0	0	0	1	NA	NA
IL19	NC_006113.4	2574176	2579870	+	0	0	NA	0	0	0	0	1	NA	NA
IL1B	NC_006109.4	4616889	4618625	-	0	0	NA	0	0	0	0	1	NA	NA
IL23A	NC_008465.3	766818	769468	+	0	0	NA	0	0	0	0	1	NA	NA
IL23R	NC_006095.4	28725582	28739900	+	0	0	NA	0	0	0	0	1	NA	NA
IL3	NC_006100.4	16810412	16811625	+	0	0	NA	0	0	0	0	1	NA	NA
IL4I1	NC_006103.4	205312	210738	-	0	0	NA	0	0	0	0	1	NA	NA
IL4R	NC_006101.4	7328987	7343830	+	0	0	NA	0	0	0	0	1	NA	NA
IL6RA	NC_006112.3	1708497	1714085	+	0	0	NA	0	0	0	0	1	NA	NA
IL8L1	NC_006091.4	51270481	51273559	+	0	0	NA	0	0	0	0	1	NA	NA
IL8L2	NC_006091.4	51283110	51286274	+	0	0	NA	0	0	0	0	1	NA	NA
IL9R	NC_006101.4	7368662	7378861	+	0	0	NA	0	0	0	0	1	NA	NA
ILF2	NC_006112.3	1701006	1705564	+	0	0	NA	0	0	0	0	1	NA	NA
ILK	NC_006088.4	194378828	194384323	-	0	0	NA	0	0	0	0	1	NA	NA
IMP3	NC_006090.4	110315325	110316480	+	0	0	NA	0	0	0	0	1	>200	0
INCENP	NC_006092.4	17085226	17109155	+	0	0	NA	0	0	0	0	1	NA	NA
INCENPL	NC_006092.4	17067705	17085004	-	0	0	NA	0	0	0	0	1	NA	NA
ING5	NC_006096.4	4767301	4775742	-	0	0	NA	0	0	0	0	1	>200	0
INHA	NC_006094.4	22176226	22177904	-	0	0	NA	0	0	0	0	1	>200	0
INPPL1	NC_006091.4	1242232	1251379	-	0	0	NA	0	0	0	0	1	NA	NA
INTS3	NC_006112.3	1654016	1685697	-	0	0	NA	0	0	0	0	1	NA	NA
IQCC	NC_006110.4	5177193	5179525	-	0	0	NA	0	0	0	0	1	NA	NA
IQCD	NC_006102.4	10823000	10829661	-	0	0	NA	0	0	0	0	1	NA	NA
IQUB	NC_006088.4	22312763	22335195	+	0	0	NA	0	0	0	0	1	>200	0
IRF5	NC_006088.4	672595	677898	+	0	0	NA	0	0	0	0	1	NA	NA
IRF9	NC_006107.4	10265011	10267614	-	0	0	NA	0	0	0	0	1	NA	NA
ISLR	NC_006097.4	2531098	2535068	-	0	0	NA	0	0	0	0	1	NA	NA
ITGA11	NC_006097.4	19180826	19231800	-	0	0	NA	0	0	0	0	1	>200	0
ITGA3	NC_006114.4	3186220	3201582	-	0	0	NA	0	0	0	0	1	NA	NA
ITGAD	NC_006101.4	15015886	15034357	+	0	0	NA	0	0	0	0	1	NA	NA
ITPA	NC_006095.4	4719328	4722976	-	0	0	NA	0	0	0	0	1	NA	NA
JAGN1	NC_006099.4	11513937	11515143	+	0	0	NA	0	0	0	0	1	>200	0
JMJD6	NC_006105.4	4287924	4299050	+	0	0	NA	0	0	0	0	1	>200	0
JMJD8	NC_006101.4	13204821	13206543	-	0	0	NA	0	0	0	0	1	NA	NA
JTB	NC_006112.3	2079695	2081048	-	0	0	NA	0	0	0	0	1	NA	NA
KBTBD13	NC_006097.4	17789500	17793591	-	0	0	NA	0	0	0	0	1	>200	0
KCNA10	NC_006113.4	1427486	1429335	-	0	0	NA	0	0	0	0	1	>200	0
KCNE3	NC_006088.4	196005231	196007018	+	0	0	NA	0	0	0	0	1	NA	NA
KCNH2	NC_006089.4	311265	334117	+	0	0	NA	0	0	0	0	1	NA	NA
KCNH4	NC_006114.4	5271367	5280067	-	0	0	NA	0	0	0	0	1	48	3.61011
KCNJ9	NC_006114.4	3455393	3463829	-	0	0	NA	0	0	0	0	1	8	5.63771
KHK	NC_006090.4	104952545	104954489	+	0	0	NA	0	0	0	0	1	NA	NA
KIAA0101	NC_006097.4	1141759	1142255	+	0	0	NA	0	0	0	0	1	NA	NA
KIAA0753	NC_006106.4	9828953	9848715	+	0	0	NA	0	0	0	0	1	>200	0
KIAA0907	NC_006112.3	2296753	2306074	-	0	0	NA	0	0	0	0	1	NA	NA
KIAA1324	NC_006113.4	1138235	1148322	+	0	0	NA	0	0	0	0	1	NA	NA
KIAA1755	NC_006107.4	10553417	10563520	+	0	0	NA	0	0	0	0	1	NA	NA
KIF18B	NC_006114.4	1471055	1478984	-	0	0	NA	0	0	0	0	1	NA	NA
KIF19	NC_006105.4	9210044	9214651	+	0	0	NA	0	0	0	0	1	NA	NA
KIF4A	NC_006091.4	1283307	1300499	+	0	0	NA	0	0	0	0	1	NA	NA
KIF9	NC_006089.4	3971506	3994474	-	0	0	NA	0	0	0	0	1	NA	NA
KIFC1	NC_006103.4	240143	244871	-	0	0	NA	0	0	0	0	1	NA	NA
KIRREL	NC_006112.3	1301854	1321563	+	0	0	NA	0	0	0	0	1	NA	NA
KLHDC10	NC_006088.4	908890	922276	+	0	0	NA	0	0	0	0	1	NA	NA
KLHDC8A	NC_006113.4	2085365	2099214	-	0	0	NA	0	0	0	0	1	NA	NA
KLHDC8B	NC_006099.4	11553066	11556195	-	0	0	NA	0	0	0	0	1	>200	0
KLHL10	NC_006114.4	5113816	5117579	+	0	0	NA	0	0	0	0	1	NA	NA
KLHL18	NC_006089.4	3994525	4016148	+	0	0	NA	0	0	0	0	1	NA	NA
KLHL28	NC_006092.4	58983873	58997753	+	0	0	NA	0	0	0	0	1	NA	NA
KMO	NC_006094.4	7157098	7167792	+	0	0	NA	0	0	0	0	1	>200	0
KNSTRN	NC_006092.4	749134	754149	+	0	0	NA	0	0	0	0	1	>200	0
KRT10	NC_006114.4	4997475	5002485	-	0	0	NA	0	0	0	0	1	NA	NA
KRT14	NC_006114.4	5042180	5046007	-	0	0	NA	0	0	0	0	1	NA	NA
KRT15	NC_006114.4	4965385	4969810	-	0	0	NA	0	0	0	0	1	>200	0
KRT19	NC_006114.4	4972722	4977384	-	0	0	NA	0	0	0	0	1	NA	NA
KRT5	NC_008465.3	1313422	1320284	+	0	0	NA	0	0	0	0	1	NA	NA
KRT6A	NC_008465.3	1201559	1331196	+	0	0	NA	0	0	0	0	1	NA	NA
KRT7	NC_008465.3	1354637	1364158	-	0	0	NA	0	0	0	0	1	NA	NA
KRT75	NC_008465.3	1334938	1338774	+	0	0	NA	0	0	0	0	1	NA	NA
KRT75L1	NC_008465.3	1211399	1216499	+	0	0	NA	0	0	0	0	1	NA	NA
KRT75L2	NC_008465.3	1228989	1233074	+	0	0	NA	0	0	0	0	1	NA	NA
KRT75L4	NC_008465.3	1292981	1310347	+	0	0	NA	0	0	0	0	1	NA	NA
KRT80	NC_008465.3	1375931	1393067	+	0	0	NA	0	0	0	0	1	NA	NA
KRT9	NC_006114.4	5008298	5012957	-	0	0	NA	0	0	0	0	1	NA	NA
KRTAP10-4	NC_006112.3	1912397	1913451	-	0	0	NA	0	0	0	0	1	NA	NA
KRTAP19-2	NC_006112.3	2019017	2019672	+	0	0	NA	0	0	0	0	1	NA	NA
KRTCAP3	NC_006090.4	104855541	104857980	-	0	0	NA	0	0	0	0	1	>200	0
KTI12	NC_006095.4	24333233	24335731	-	0	0	NA	0	0	0	0	1	NA	NA
KXD1	NC_006115.4	3902745	3904217	-	0	0	NA	0	0	0	0	1	NA	NA
L3HYPDH	NC_006092.4	54895475	54897958	+	0	0	NA	0	0	0	0	1	NA	NA
LACTB2	NC_006089.4	117176792	117190064	-	0	0	NA	0	0	0	0	1	NA	NA
LACTBL1	NC_006108.4	5865440	5881580	-	0	0	NA	0	0	0	0	1	NA	NA
LAD1	NC_006113.4	787875	795656	+	0	0	NA	0	0	0	0	1	>200	0
LAMB2	NC_006099.4	11585512	11594603	+	0	0	NA	0	0	0	0	1	NA	NA
LAMTOR1	NC_006088.4	194247653	194252977	-	0	0	NA	0	0	0	0	1	NA	NA
LAMTOR2	NC_006112.3	815073	817920	+	0	0	NA	0	0	0	0	1	NA	NA
LAMTOR5	NC_006113.4	1413361	1415623	-	0	0	NA	0	0	0	0	1	NA	NA
LARP4	NC_008465.3	219981	239805	-	0	0	NA	0	0	0	0	1	NA	NA
LAT2	NC_006106.4	2832635	2842283	-	0	0	NA	0	0	0	0	1	NA	NA
LCN8	NC_006104.4	992193	995196	-	0	0	NA	0	0	0	0	1	NA	NA
LDHD	NC_006098.4	2022848	2026734	-	0	0	NA	0	0	0	0	1	>200	0
LDLRAD1	NC_006095.4	25200570	25207066	-	0	0	NA	0	0	0	0	1	NA	NA
LEPR	NC_006095.4	28434800	28465001	+	0	0	NA	0	0	0	0	1	>200	0
LETM2	NC_006109.4	2347518	2352326	+	0	0	NA	0	0	0	0	1	>200	0
LGALS1	NC_006088.4	51200885	51204017	-	0	0	NA	0	0	0	0	1	>200	0
LGALS3	NC_006092.4	56397118	56400257	-	0	0	NA	0	0	0	0	1	NA	NA
LHFPL5	NC_006113.4	93741	97080	+	0	0	NA	0	0	0	0	1	NA	NA
LIG1	NC_008466.3	798511	805682	+	0	0	NA	0	0	0	0	1	NA	NA
LIMA1	NC_008465.3	248532	272691	+	0	0	NA	0	0	0	0	1	NA	NA
LIN52	NC_006092.4	37788397	37830223	+	0	0	NA	0	0	0	0	1	NA	NA
LIPT2	NC_006088.4	196001852	196004404	+	0	0	NA	0	0	0	0	1	NA	NA
LITAF	NC_006101.4	926023	952911	+	0	0	NA	0	0	0	0	1	>200	0
LIX1	NC_006127.4	51552825	51581108	+	0	0	NA	0	0	0	0	1	NA	NA
LL	NC_006093.4	4475380	4477845	-	0	0	NA	0	0	0	0	1	NA	NA
LLGL1	NC_006101.4	5083563	5095523	+	0	0	NA	0	0	0	0	1	>200	0
LMAN2	NC_006100.4	10100243	10104675	-	0	0	NA	0	0	0	0	1	>200	0
LMBR1L	NC_008465.3	572342	577691	-	0	0	NA	0	0	0	0	1	NA	NA
LMF2	NC_006088.4	645079	651789	-	0	0	NA	0	0	0	0	1	NA	NA
LMNB1	NC_006127.4	56212816	56235773	+	0	0	NA	0	0	0	0	1	NA	NA
LOC100502566	NC_006091.4	1999027	2000494	+	0	0	NA	0	0	0	0	1	>200	0
LOC100857116	NC_006108.4	6545463	6549032	-	0	0	NA	0	0	0	0	1	NA	NA
LOC100857190	NC_006112.3	2751200	2755777	-	0	0	NA	0	0	0	0	1	NA	NA
LOC100857251	NC_006112.3	925626	933506	+	0	0	NA	0	0	0	0	1	NA	NA
LOC100857280	NC_006091.4	60363255	60368923	-	0	0	NA	0	0	0	0	1	NA	NA
LOC100857297	NC_006112.3	1032585	1044971	-	0	0	NA	0	0	0	0	1	NA	NA
LOC100857298	NC_006114.4	5506845	5510258	+	0	0	NA	0	0	0	0	1	>200	0
LOC100857321	NC_006099.4	3499439	3500757	+	0	0	NA	0	0	0	0	1	>200	0
LOC100857334	NC_006126.4	1953096	1954928	-	0	0	NA	0	0	0	0	1	NA	NA
LOC100857335	NC_008465.3	786634	789304	-	0	0	NA	0	0	0	0	1	NA	NA
LOC100857337	NC_006091.4	86418410	86421541	-	0	0	NA	0	0	0	0	1	NA	NA
LOC100857343	NC_006097.4	734245	736838	-	0	0	NA	0	0	0	0	1	NA	NA
LOC100857348	NC_006089.4	149055111	149055861	+	0	0	NA	0	0	0	0	1	NA	NA
LOC100857367	NC_006112.3	1041747	1042135	+	0	0	NA	0	0	0	0	1	NA	NA
LOC100857382	NC_006089.4	149138444	149138948	+	0	0	NA	0	0	0	0	1	NA	NA
LOC100857402	NC_006104.4	6712960	6714690	+	0	0	NA	0	0	0	0	1	NA	NA
LOC100857403	NC_006127.4	7385369	7386304	+	0	0	NA	0	0	0	0	1	NA	NA
LOC100857414	NC_006112.3	2649883	2657535	+	0	0	NA	0	0	0	0	1	NA	NA
LOC100857421	NC_006090.4	41943904	41950538	+	0	0	NA	0	0	0	0	1	NA	NA
LOC100857439	NC_006088.4	48197145	48197732	-	0	0	NA	0	0	0	0	1	>200	0
LOC100857442	NC_006112.3	2665269	2666886	-	0	0	NA	0	0	0	0	1	NA	NA
LOC100857467	NC_006101.4	13119174	13120572	+	0	0	NA	0	0	0	0	1	NA	NA
LOC100857468	NC_006112.3	1080919	1087221	-	0	0	NA	0	0	0	0	1	NA	NA
LOC100857512	NC_006112.3	1413151	1416561	-	0	0	NA	0	0	0	0	1	NA	NA
LOC100857560	NC_006089.4	31169952	31173738	+	0	0	NA	0	0	0	0	1	NA	NA
LOC100857563	NC_006097.4	2551528	2558479	+	0	0	NA	0	0	0	0	1	NA	NA
LOC100857581	NC_006112.3	2857292	2859404	+	0	0	NA	0	0	0	0	1	NA	NA
LOC100857638	NC_028740.1	19327	22264	+	0	0	NA	0	0	0	0	1	NA	NA
LOC100857659	NC_006114.4	4992053	4995428	-	0	0	NA	0	0	0	0	1	>200	0
LOC100857682	NC_006126.4	3303786	3305258	-	0	0	NA	0	0	0	0	1	NA	NA
LOC100857686	NC_006090.4	105523416	105526419	-	0	0	NA	0	0	0	0	1	NA	NA
LOC100857698	NC_006089.4	149085167	149085870	+	0	0	NA	0	0	0	0	1	NA	NA
LOC100857706	NC_006105.4	9968346	9971608	+	0	0	NA	0	0	0	0	1	NA	NA
LOC100857710	NC_006089.4	149043319	149043976	-	0	0	NA	0	0	0	0	1	NA	NA
LOC100857714	NC_006112.3	1266694	1272789	-	0	0	NA	0	0	0	0	1	NA	NA
LOC100857732	NC_006090.4	105024019	105028465	-	0	0	NA	0	0	0	0	1	NA	NA
LOC100857744	NC_006127.4	7381396	7385265	+	0	0	NA	0	0	0	0	1	NA	NA
LOC100857766	NC_006096.4	14971520	14974517	+	0	0	NA	0	0	0	0	1	>200	0
LOC100857781	NC_008465.3	525064	527328	+	0	0	NA	0	0	0	0	1	NA	NA
LOC100857794	NC_006109.4	2473586	2478825	+	0	0	NA	0	0	0	0	1	NA	NA
LOC100857811	NC_006112.3	1403569	1413068	-	0	0	NA	0	0	0	0	1	NA	NA
LOC100857813	NC_006088.4	194618171	194619378	-	0	0	NA	0	0	0	0	1	NA	NA
LOC100857817	NC_006091.4	86300967	86305417	-	0	0	NA	0	0	0	0	1	NA	NA
LOC100857820	NC_006098.4	1225096	1227281	+	0	0	NA	0	0	0	0	1	NA	NA
LOC100857834	NC_006092.4	40804	43057	+	0	0	NA	0	0	0	0	1	NA	NA
LOC100857839	NC_006091.4	86308026	86311894	-	0	0	NA	0	0	0	0	1	NA	NA
LOC100857840	NC_006092.4	27436031	27442446	+	0	0	NA	0	0	0	0	1	NA	NA
LOC100857843	NC_006098.4	1246947	1250921	-	0	0	NA	0	0	0	0	1	NA	NA
LOC100857858	NC_008465.3	595464	599194	+	0	0	NA	0	0	0	0	1	NA	NA
LOC100857871	NC_006091.4	86363368	86365046	-	0	0	NA	0	0	0	0	1	NA	NA
LOC100857897	NC_006101.4	12283052	12286001	-	0	0	NA	0	0	0	0	1	NA	NA
LOC100857906	NC_006091.4	86372542	86374936	-	0	0	NA	0	0	0	0	1	NA	NA
LOC100857925	NC_006088.4	194226145	194229324	+	0	0	NA	0	0	0	0	1	NA	NA
LOC100857940	NC_006089.4	149097878	149098244	+	0	0	NA	0	0	0	0	1	NA	NA
LOC100857945	NC_006110.4	1572164	1572961	+	0	0	NA	0	0	0	0	1	NA	NA
LOC100857947	NC_006127.4	7387136	7388113	+	0	0	NA	0	0	0	0	1	NA	NA
LOC100857948	NC_006127.4	71069429	71073645	-	0	0	NA	0	0	0	0	1	NA	NA
LOC100857975	NC_006100.4	1801370	1807167	+	0	0	NA	0	0	0	0	1	NA	NA
LOC100857983	NC_006096.4	5321970	5327232	+	0	0	NA	0	0	0	0	1	NA	NA
LOC100858014	NC_006090.4	104942180	104947265	+	0	0	NA	0	0	0	0	1	NA	NA
LOC100858040	NC_006100.4	1771109	1780965	+	0	0	NA	0	0	0	0	1	NA	NA
LOC100858107	NC_006112.3	1758811	1780362	-	0	0	NA	0	0	0	0	1	NA	NA
LOC100858130	NC_006115.4	3055214	3060824	-	0	0	NA	0	0	0	0	1	NA	NA
LOC100858172	NC_006091.4	86429429	86440523	-	0	0	NA	0	0	0	0	1	NA	NA
LOC100858177	NC_006127.4	7401155	7405030	+	0	0	NA	0	0	0	0	1	NA	NA
LOC100858196	NC_006089.4	348009	353578	+	0	0	NA	0	0	0	0	1	NA	NA
LOC100858282	NC_006103.4	433351	436370	-	0	0	NA	0	0	0	0	1	NA	NA
LOC100858336	NC_006101.4	12904343	12989126	+	0	0	NA	0	0	0	0	1	>200	0
LOC100858347	NC_006102.4	6296549	6299263	+	0	0	NA	0	0	0	0	1	NA	NA
LOC100858360	NC_006097.4	20154478	20158013	+	0	0	NA	0	0	0	0	1	NA	NA
LOC100858427	NC_006114.4	980257	981451	-	0	0	NA	0	0	0	0	1	NA	NA
LOC100858439	NC_006114.4	5048947	5052819	-	0	0	NA	0	0	0	0	1	NA	NA
LOC100858444	NC_006089.4	149032364	149035870	-	0	0	NA	0	0	0	0	1	NA	NA
LOC100858447	NC_006096.4	5214754	5217385	+	0	0	NA	0	0	0	0	1	NA	NA
LOC100858504	NC_006112.3	2014658	2015546	+	0	0	NA	0	0	0	0	1	NA	NA
LOC100858506	NC_006127.4	7399095	7399974	+	0	0	NA	0	0	0	0	1	NA	NA
LOC100858529	NC_006103.4	330521	356187	-	0	0	NA	0	0	0	0	1	NA	NA
LOC100858579	NC_006115.4	1266960	1270783	-	0	0	NA	0	0	0	0	1	NA	NA
LOC100858581	NC_006103.4	419841	422729	+	0	0	NA	0	0	0	0	1	NA	NA
LOC100858603	NC_006127.4	73519362	73528014	+	0	0	NA	0	0	0	0	1	NA	NA
LOC100858624	NC_006091.4	13849695	13859307	+	0	0	NA	0	0	0	0	1	NA	NA
LOC100858647	NC_006093.4	17825599	17830045	+	0	0	NA	0	0	0	0	1	NA	NA
LOC100858703	NC_006099.4	3229457	3231713	-	0	0	NA	0	0	0	0	1	>200	0
LOC100858713	NC_006096.4	9521450	9530104	-	0	0	NA	0	0	0	0	1	NA	NA
LOC100858728	NC_006112.3	2021632	2026949	-	0	0	NA	0	0	0	0	1	NA	NA
LOC100858762	NC_006127.4	7408182	7414041	+	0	0	NA	0	0	0	0	1	NA	NA
LOC100858797	NC_006112.3	2059093	2060269	+	0	0	NA	0	0	0	0	1	NA	NA
LOC100858814	NC_006106.4	5798297	5799364	+	0	0	NA	0	0	0	0	1	>200	0
LOC100858849	NC_006106.4	5799332	5801941	-	0	0	NA	0	0	0	0	1	NA	NA
LOC100858909	NC_006091.4	2116740	2123612	-	0	0	NA	0	0	0	0	1	NA	NA
LOC100858937	NC_006100.4	1721473	1724840	+	0	0	NA	0	0	0	0	1	NA	NA
LOC100858941	NC_006127.4	27893323	27924007	+	0	0	NA	0	0	0	0	1	NA	NA
LOC100858942	NC_008465.3	1476589	1481160	+	0	0	NA	0	0	0	0	1	NA	NA
LOC100858951	NC_006104.4	5856742	5863491	+	0	0	NA	0	0	0	0	1	>200	0
LOC100858953	NC_006127.4	9032771	9039809	-	0	0	NA	0	0	0	0	1	NA	NA
LOC100858962	NC_006112.3	2550458	2553482	+	0	0	NA	0	0	0	0	1	NA	NA
LOC100858973	NC_008465.3	1507122	1512946	-	0	0	NA	0	0	0	0	1	NA	NA
LOC100858984	NC_006102.4	9321172	9322783	-	0	0	NA	0	0	0	0	1	NA	NA
LOC100858995	NC_006102.4	10109371	10110947	+	0	0	NA	0	0	0	0	1	NA	NA
LOC100858999	NC_006112.3	2553301	2560072	-	0	0	NA	0	0	0	0	1	NA	NA
LOC100859022	NC_006100.4	1793493	1797468	+	0	0	NA	0	0	0	0	1	NA	NA
LOC100859032	NC_006127.4	7376357	7381293	+	0	0	NA	0	0	0	0	1	NA	NA
LOC100859039	NC_006089.4	149048876	149049635	-	0	0	NA	0	0	0	0	1	NA	NA
LOC100859100	NC_006103.4	494551	508816	+	0	0	NA	0	0	0	0	1	NA	NA
LOC100859104	NC_028739.1	10895	14378	-	0	0	NA	0	0	0	0	1	NA	NA
LOC100859134	NC_006103.4	458832	481534	-	0	0	NA	0	0	0	0	1	NA	NA
LOC100859173	NC_006091.4	344276	362925	+	0	0	NA	0	0	0	0	1	>200	0
LOC100859249	NC_006112.3	959380	960434	+	0	0	NA	0	0	0	0	1	NA	NA
LOC100859272	NC_006107.4	10684816	10686323	+	0	0	NA	0	0	0	0	1	NA	NA
LOC100859318	NC_006105.4	10518988	10529402	+	0	0	NA	0	0	0	0	1	NA	NA
LOC100859347	NC_006094.4	6604395	6618615	+	0	0	NA	0	0	0	0	1	>200	0
LOC100859353	NC_006127.4	34402932	34416018	-	0	0	NA	0	0	0	0	1	>200	0
LOC100859367	NC_006110.4	3228923	3235073	-	0	0	NA	0	0	0	0	1	NA	NA
LOC100859414	NC_006127.4	7389778	7395023	+	0	0	NA	0	0	0	0	1	NA	NA
LOC100859427	NC_006112.3	966460	967631	+	0	0	NA	0	0	0	0	1	NA	NA
LOC100859442	NC_006127.4	64092925	64103974	+	0	0	NA	0	0	0	0	1	>200	0
LOC100859449	NC_006105.4	10714782	10720052	+	0	0	NA	0	0	0	0	1	NA	NA
LOC100859466	NC_006114.4	1005986	1013849	-	0	0	NA	0	0	0	0	1	NA	NA
LOC100859468	NC_006091.4	11249294	11268456	-	0	0	NA	0	0	0	0	1	>200	0
LOC100859484	NC_006100.4	856161	860382	-	0	0	NA	0	0	0	0	1	NA	NA
LOC100859500	NC_006114.4	1062921	1063981	+	0	0	NA	0	0	0	0	1	NA	NA
LOC100859531	NC_006103.4	251318	280537	-	0	0	NA	0	0	0	0	1	NA	NA
LOC100859551	NC_006127.4	34308535	34321082	-	0	0	NA	0	0	0	0	1	>200	0
LOC100859584	NC_006102.4	11210897	11217276	-	0	0	NA	0	0	0	0	1	>200	0
LOC100859586	NC_006112.3	1020735	1021650	-	0	0	NA	0	0	0	0	1	NA	NA
LOC100859599	NC_006088.4	194759783	194764157	+	0	0	NA	0	0	0	0	1	>200	0
LOC100859615	NC_006110.4	4426465	4427845	+	0	0	NA	0	0	0	0	1	>200	0
LOC100859616	NC_006112.3	1022275	1023023	+	0	0	NA	0	0	0	0	1	NA	NA
LOC100859645	NC_006090.4	88748800	88759482	+	0	0	NA	0	0	0	0	1	NA	NA
LOC100859657	NC_006112.3	1020928	1025554	-	0	0	NA	0	0	0	0	1	NA	NA
LOC100859690	NC_006114.4	1200532	1201707	-	0	0	NA	0	0	0	0	1	NA	NA
LOC100859704	NC_006112.3	2183086	2190519	+	0	0	NA	0	0	0	0	1	NA	NA
LOC100859722	NC_006112.3	1030356	1031017	+	0	0	NA	0	0	0	0	1	NA	NA
LOC100859726	NC_008465.3	1604233	1606812	-	0	0	NA	0	0	0	0	1	NA	NA
LOC100859737	NC_008465.3	581111	584921	-	0	0	NA	0	0	0	0	1	NA	NA
LOC100859756	NC_006112.3	1030236	1034932	+	0	0	NA	0	0	0	0	1	NA	NA
LOC100859767	NC_006112.3	204000	205667	+	0	0	NA	0	0	0	0	1	NA	NA
LOC100859777	NC_008466.3	600428	614975	+	0	0	NA	0	0	0	0	1	NA	NA
LOC100859790	NC_006112.3	1037906	1038601	+	0	0	NA	0	0	0	0	1	NA	NA
LOC100859804	NC_006109.4	2478882	2490087	+	0	0	NA	0	0	0	0	1	NA	NA
LOC100859805	NC_006113.4	1591719	1604939	+	0	0	NA	0	0	0	0	1	NA	NA
LOC100859807	NC_006103.4	440659	468630	+	0	0	NA	0	0	0	0	1	NA	NA
LOC100859819	NC_006115.4	3327169	3329225	+	0	0	NA	0	0	0	0	1	NA	NA
LOC100859830	NC_006114.4	650260	651359	+	0	0	NA	0	0	0	0	1	NA	NA
LOC100859837	NC_006088.4	194699560	194707280	+	0	0	NA	0	0	0	0	1	>200	0
LOC100859840	NC_006098.4	18663342	18665615	-	0	0	NA	0	0	0	0	1	NA	NA
LOC100859848	NC_006097.4	10719647	10731458	+	0	0	NA	0	0	0	0	1	NA	NA
LOC100859849	NC_006112.3	2631656	2638310	-	0	0	NA	0	0	0	0	1	NA	NA
LOC100859853	NC_006115.4	3324491	3326978	-	0	0	NA	0	0	0	0	1	NA	NA
LOC100859906	NC_006108.4	6540974	6544189	-	0	0	NA	0	0	0	0	1	NA	NA
LOC101747234	NC_006088.4	109271707	109290701	+	0	0	NA	0	0	0	0	1	NA	NA
LOC101747287	NC_006114.4	1730473	1736235	-	0	0	NA	0	0	0	0	1	>200	0
LOC101747310	NC_006100.4	2392817	2401689	-	0	0	NA	0	0	0	0	1	NA	NA
LOC101747354	NC_006088.4	80596164	80596649	+	0	0	NA	0	0	0	0	1	NA	NA
LOC101747378	NC_006094.4	28388792	28407157	-	0	0	NA	0	0	0	0	1	NA	NA
LOC101747386	NC_006112.3	1877071	1878016	+	0	0	NA	0	0	0	0	1	NA	NA
LOC101747429	NC_006100.4	2431012	2435671	+	0	0	NA	0	0	0	0	1	NA	NA
LOC101747452	NC_006099.4	3237532	3239776	+	0	0	NA	0	0	0	0	1	>200	0
LOC101747454	NC_006103.4	109679	111201	-	0	0	NA	0	0	0	0	1	NA	NA
LOC101747487	NC_006115.4	3375433	3377459	+	0	0	NA	0	0	0	0	1	NA	NA
LOC101747521	NC_006114.4	1462242	1466016	+	0	0	NA	0	0	0	0	1	NA	NA
LOC101747522	NC_006114.4	4857355	4863016	-	0	0	NA	0	0	0	0	1	NA	NA
LOC101747531	NC_006093.4	22300564	22301477	+	0	0	NA	0	0	0	0	1	NA	NA
LOC101747545	NC_006088.4	195725009	195726606	-	0	0	NA	0	0	0	0	1	NA	NA
LOC101747554	NC_006089.4	149514097	149520125	-	0	0	NA	0	0	0	0	1	>200	0
LOC101747625	NC_006106.4	4786071	4788012	+	0	0	NA	0	0	0	0	1	NA	NA
LOC101747632	NC_006089.4	4016290	4017981	+	0	0	NA	0	0	0	0	1	NA	NA
LOC101747634	NC_008465.3	693370	702233	-	0	0	NA	0	0	0	0	1	NA	NA
LOC101747645	NC_006092.4	52984612	52986240	-	0	0	NA	0	0	0	0	1	NA	NA
LOC101747649	NC_006127.4	60866701	60869085	-	0	0	NA	0	0	0	0	1	NA	NA
LOC101747670	NC_008466.3	810096	813427	-	0	0	NA	0	0	0	0	1	NA	NA
LOC101747688	NC_006127.4	73495252	73499910	+	0	0	NA	0	0	0	0	1	NA	NA
LOC101747704	NC_006112.3	846955	849648	-	0	0	NA	0	0	0	0	1	NA	NA
LOC101747756	NC_006127.4	73474023	73479810	+	0	0	NA	0	0	0	0	1	NA	NA
LOC101747779	NC_008465.3	1634115	1646267	+	0	0	NA	0	0	0	0	1	NA	NA
LOC101747796	NC_006112.3	1943846	1946131	-	0	0	NA	0	0	0	0	1	NA	NA
LOC101747797	NC_006114.4	354463	409472	-	0	0	NA	0	0	0	0	1	NA	NA
LOC101747800	NC_006127.4	60873016	60875717	-	0	0	NA	0	0	0	0	1	NA	NA
LOC101747807	NC_006089.4	356171	950188	+	0	0	NA	0	0	0	0	1	NA	NA
LOC101747823	NC_006114.4	1717744	1723300	+	0	0	NA	0	0	0	0	1	NA	NA
LOC101747853	NC_006112.3	1943612	1951026	-	0	0	NA	0	0	0	0	1	NA	NA
LOC101747856	NC_006127.4	60885651	60888186	-	0	0	NA	0	0	0	0	1	NA	NA
LOC101747860	NC_008466.3	778879	792389	-	0	0	NA	0	0	0	0	1	NA	NA
LOC101747868	NC_006089.4	148421562	148427765	+	0	0	NA	0	0	0	0	1	NA	NA
LOC101747875	NC_006103.4	215186	215840	+	0	0	NA	0	0	0	0	1	NA	NA
LOC101747901	NC_006103.4	424398	427415	-	0	0	NA	0	0	0	0	1	NA	NA
LOC101747917	NC_006096.4	5207903	5210113	-	0	0	NA	0	0	0	0	1	NA	NA
LOC101747920	NC_006127.4	60892019	60894720	-	0	0	NA	0	0	0	0	1	NA	NA
LOC101747961	NC_006112.3	1952705	1955656	-	0	0	NA	0	0	0	0	1	NA	NA
LOC101747972	NC_006127.4	73431460	73435988	+	0	0	NA	0	0	0	0	1	NA	NA
LOC101747989	NC_006127.4	60898607	60901832	-	0	0	NA	0	0	0	0	1	NA	NA
LOC101747990	NC_006127.4	73460495	73466237	+	0	0	NA	0	0	0	0	1	NA	NA
LOC101747995	NC_006089.4	148480932	148489636	-	0	0	NA	0	0	0	0	1	NA	NA
LOC101748032	NC_006112.3	2574091	2575912	-	0	0	NA	0	0	0	0	1	NA	NA
LOC101748037	NC_008465.3	606043	612982	+	0	0	NA	0	0	0	0	1	NA	NA
LOC101748049	NC_006107.4	10173603	10174834	+	0	0	NA	0	0	0	0	1	NA	NA
LOC101748055	NC_006127.4	60917338	60920457	-	0	0	NA	0	0	0	0	1	NA	NA
LOC101748113	NC_006091.4	86491772	86506314	-	0	0	NA	0	0	0	0	1	NA	NA
LOC101748117	NC_006114.4	275201	277549	-	0	0	NA	0	0	0	0	1	NA	NA
LOC101748132	NC_006103.4	329691	348948	-	0	0	NA	0	0	0	0	1	NA	NA
LOC101748153	NC_006099.4	11572036	11585356	+	0	0	NA	0	0	0	0	1	>200	0
LOC101748164	NC_006112.3	2008222	2013410	-	0	0	NA	0	0	0	0	1	NA	NA
LOC101748182	NC_006092.4	55071542	55073035	-	0	0	NA	0	0	0	0	1	NA	NA
LOC101748203	NC_006115.4	1054356	1058753	+	0	0	NA	0	0	0	0	1	NA	NA
LOC101748207	NC_008466.3	775603	778714	-	0	0	NA	0	0	0	0	1	NA	NA
LOC101748312	NC_006089.4	494782	500223	-	0	0	NA	0	0	0	0	1	NA	NA
LOC101748328	NC_006104.4	809735	815824	-	0	0	NA	0	0	0	0	1	NA	NA
LOC101748348	NC_006127.4	53264217	53268919	+	0	0	NA	0	0	0	0	1	NA	NA
LOC101748375	NC_006103.4	427428	433437	-	0	0	NA	0	0	0	0	1	NA	NA
LOC101748416	NC_006127.4	53261220	53263171	+	0	0	NA	0	0	0	0	1	NA	NA
LOC101748417	NC_008466.3	769640	774242	-	0	0	NA	0	0	0	0	1	NA	NA
LOC101748432	NC_006127.4	60819000	60822186	-	0	0	NA	0	0	0	0	1	NA	NA
LOC101748436	NC_006089.4	479412	484273	-	0	0	NA	0	0	0	0	1	NA	NA
LOC101748496	NC_006127.4	60848365	60851317	-	0	0	NA	0	0	0	0	1	NA	NA
LOC101748499	NC_006103.4	581811	586317	-	0	0	NA	0	0	0	0	1	NA	NA
LOC101748538	NC_006097.4	726359	729218	+	0	0	NA	0	0	0	0	1	NA	NA
LOC101748539	NC_006098.4	1227382	1231599	-	0	0	NA	0	0	0	0	1	NA	NA
LOC101748543	NC_006095.4	20848780	20850746	-	0	0	NA	0	0	0	0	1	>200	0
LOC101748544	NC_006127.4	8463153	8465185	-	0	0	NA	0	0	0	0	1	NA	NA
LOC101748547	NC_006127.4	60858552	60861102	-	0	0	NA	0	0	0	0	1	NA	NA
LOC101748559	NC_006103.4	306499	311368	-	0	0	NA	0	0	0	0	1	NA	NA
LOC101748605	NC_006127.4	60879333	60882452	-	0	0	NA	0	0	0	0	1	NA	NA
LOC101748650	NC_006088.4	192935115	192936349	+	0	0	NA	0	0	0	0	1	NA	NA
LOC101748660	NC_006127.4	60905303	60908151	-	0	0	NA	0	0	0	0	1	NA	NA
LOC101748678	NC_006092.4	48259651	48261190	+	0	0	NA	0	0	0	0	1	NA	NA
LOC101748683	NC_006088.4	194506121	194507731	+	0	0	NA	0	0	0	0	1	NA	NA
LOC101748716	NC_006127.4	60911282	60914965	-	0	0	NA	0	0	0	0	1	NA	NA
LOC101748744	NC_006091.4	2450002	2453207	+	0	0	NA	0	0	0	0	1	NA	NA
LOC101748750	NC_006090.4	33913704	33936415	+	0	0	NA	0	0	0	0	1	NA	NA
LOC101748751	NC_006111.4	319624	324467	+	0	0	NA	0	0	0	0	1	NA	NA
LOC101748764	NC_006101.4	6264076	6266001	+	0	0	NA	0	0	0	0	1	>200	0
LOC101748790	NC_008466.3	271525	278224	+	0	0	NA	0	0	0	0	1	NA	NA
LOC101748830	NC_006092.4	53869147	53870688	+	0	0	NA	0	0	0	0	1	NA	NA
LOC101748848	NC_008466.3	329665	341726	-	0	0	NA	0	0	0	0	1	NA	NA
LOC101748870	NC_006127.4	67979915	67988237	-	0	0	NA	0	0	0	0	1	NA	NA
LOC101748887	NC_006092.4	16877255	16887035	+	0	0	NA	0	0	0	0	1	NA	NA
LOC101748931	NC_006115.4	3963852	3967106	-	0	0	NA	0	0	0	0	1	NA	NA
LOC101748951	NC_006114.4	1774154	1782650	-	0	0	NA	0	0	0	0	1	NA	NA
LOC101748953	NC_006092.4	16871098	16874977	+	0	0	NA	0	0	0	0	1	NA	NA
LOC101748962	NC_006127.4	53628426	53633494	-	0	0	NA	0	0	0	0	1	NA	NA
LOC101749022	NC_008466.3	387972	415812	-	0	0	NA	0	0	0	0	1	NA	NA
LOC101749090	NC_006091.4	86452041	86456769	-	0	0	NA	0	0	0	0	1	NA	NA
LOC101749138	NC_006089.4	379028	392620	-	0	0	NA	0	0	0	0	1	NA	NA
LOC101749182	NC_006088.4	77815472	77816407	-	0	0	NA	0	0	0	0	1	NA	NA
LOC101749201	NC_006110.4	2220628	2222547	-	0	0	NA	0	0	0	0	1	NA	NA
LOC101749220	NC_006111.4	5754197	5763216	-	0	0	NA	0	0	0	0	1	NA	NA
LOC101749227	NC_006113.4	1181968	1184529	+	0	0	NA	0	0	0	0	1	NA	NA
LOC101749238	NC_006088.4	48110553	48110996	-	0	0	NA	0	0	0	0	1	>200	0
LOC101749242	NC_006127.4	68003783	68009377	-	0	0	NA	0	0	0	0	1	NA	NA
LOC101749256	NC_006088.4	115518659	115526998	-	0	0	NA	0	0	0	0	1	NA	NA
LOC101749287	NC_006105.4	1979940	1992045	-	0	0	NA	0	0	0	0	1	>200	0
LOC101749344	NC_006115.4	1082003	1083975	+	0	0	NA	0	0	0	0	1	NA	NA
LOC101749346	NC_006127.4	68034974	68040906	-	0	0	NA	0	0	0	0	1	NA	NA
LOC101749360	NC_006108.4	6539835	6541032	+	0	0	NA	0	0	0	0	1	NA	NA
LOC101749377	NC_006119.3	67713	71989	-	0	0	NA	0	0	0	0	1	NA	NA
LOC101749390	NC_006127.4	68053865	68057198	-	0	0	NA	0	0	0	0	1	NA	NA
LOC101749410	NC_006088.4	87376392	87378143	-	0	0	NA	0	0	0	0	1	NA	NA
LOC101749424	NC_006095.4	4352053	4371390	-	0	0	NA	0	0	0	0	1	NA	NA
LOC101749447	NC_006089.4	67880203	67885497	-	0	0	NA	0	0	0	0	1	NA	NA
LOC101749464	NC_006127.4	68073296	68079170	-	0	0	NA	0	0	0	0	1	NA	NA
LOC101749525	NC_006127.4	64181188	64185233	+	0	0	NA	0	0	0	0	1	NA	NA
LOC101749549	NC_008466.3	849066	853791	+	0	0	NA	0	0	0	0	1	NA	NA
LOC101749599	NC_006094.4	5852408	5856080	-	0	0	NA	0	0	0	0	1	NA	NA
LOC101749600	NC_006094.4	18690804	18697348	+	0	0	NA	0	0	0	0	1	NA	NA
LOC101749610	NC_006112.3	2816283	2829115	+	0	0	NA	0	0	0	0	1	NA	NA
LOC101749640	NC_006127.4	64187939	64192702	-	0	0	NA	0	0	0	0	1	NA	NA
LOC101749643	NC_008465.3	1176137	1181338	-	0	0	NA	0	0	0	0	1	NA	NA
LOC101749651	NC_006090.4	76105156	76106793	+	0	0	NA	0	0	0	0	1	NA	NA
LOC101749670	NC_008466.3	857743	865596	+	0	0	NA	0	0	0	0	1	NA	NA
LOC101749694	NC_006091.4	3020329	3023143	-	0	0	NA	0	0	0	0	1	NA	NA
LOC101749724	NC_008466.3	837012	844894	+	0	0	NA	0	0	0	0	1	NA	NA
LOC101749743	NC_006127.4	64193425	64198448	-	0	0	NA	0	0	0	0	1	NA	NA
LOC101749756	NC_006096.4	23624733	23631212	+	0	0	NA	0	0	0	0	1	NA	NA
LOC101749837	NC_006095.4	28361800	28363800	-	0	0	NA	0	0	0	0	1	>200	0
LOC101749891	NC_006127.4	64202927	64207198	-	0	0	NA	0	0	0	0	1	NA	NA
LOC101749915	NC_008465.3	829310	833690	+	0	0	NA	0	0	0	0	1	NA	NA
LOC101749931	NC_006112.3	61134	68960	-	0	0	NA	0	0	0	0	1	NA	NA
LOC101749970	NC_006088.4	1929773	1932616	-	0	0	NA	0	0	0	0	1	NA	NA
LOC101749992	NC_006127.4	64207210	64213570	-	0	0	NA	0	0	0	0	1	NA	NA
LOC101750035	NC_006088.4	1636714	1643824	+	0	0	NA	0	0	0	0	1	NA	NA
LOC101750052	NC_006094.4	5811071	5814588	-	0	0	NA	0	0	0	0	1	NA	NA
LOC101750108	NC_006127.4	64219709	64220926	-	0	0	NA	0	0	0	0	1	NA	NA
LOC101750121	NC_006096.4	23728790	23733215	-	0	0	NA	0	0	0	0	1	NA	NA
LOC101750143	NC_006106.4	4770763	4772264	+	0	0	NA	0	0	0	0	1	NA	NA
LOC101750175	NC_006089.4	15868253	15876243	+	0	0	NA	0	0	0	0	1	NA	NA
LOC101750219	NC_006127.4	71052578	71060120	-	0	0	NA	0	0	0	0	1	NA	NA
LOC101750245	NC_006127.4	34282788	34285316	-	0	0	NA	0	0	0	0	1	>200	0
LOC101750251	NC_006088.4	161898558	161900496	+	0	0	NA	0	0	0	0	1	NA	NA
LOC101750271	NC_006089.4	120838095	120882224	+	0	0	NA	0	0	0	0	1	NA	NA
LOC101750273	NC_006089.4	149058446	149058827	+	0	0	NA	0	0	0	0	1	NA	NA
LOC101750281	NC_006095.4	28665354	28666847	-	0	0	NA	0	0	0	0	1	NA	NA
LOC101750341	NC_006089.4	56325991	56329958	+	0	0	NA	0	0	0	0	1	NA	NA
LOC101750353	NC_006088.4	121639061	121643839	-	0	0	NA	0	0	0	0	1	NA	NA
LOC101750371	NC_006127.4	67814870	67822631	-	0	0	NA	0	0	0	0	1	NA	NA
LOC101750393	NC_006127.4	9087814	9092214	+	0	0	NA	0	0	0	0	1	NA	NA
LOC101750398	NC_006088.4	194854586	194856294	+	0	0	NA	0	0	0	0	1	NA	NA
LOC101750428	NC_006104.4	731277	734980	-	0	0	NA	0	0	0	0	1	NA	NA
LOC101750437	NC_006119.3	34414	40800	-	0	0	NA	0	0	0	0	1	NA	NA
LOC101750445	NC_006102.4	7894476	7895884	-	0	0	NA	0	0	0	0	1	NA	NA
LOC101750448	NC_006090.4	110318978	110323775	+	0	0	NA	0	0	0	0	1	NA	NA
LOC101750513	NC_008465.3	849491	859136	-	0	0	NA	0	0	0	0	1	NA	NA
LOC101750540	NC_006092.4	16888509	16898607	+	0	0	NA	0	0	0	0	1	NA	NA
LOC101750550	NC_006112.3	1052489	1053802	+	0	0	NA	0	0	0	0	1	NA	NA
LOC101750582	NC_006088.4	48177246	48178015	-	0	0	NA	0	0	0	0	1	>200	0
LOC101750584	NC_006127.4	67835047	67842808	-	0	0	NA	0	0	0	0	1	NA	NA
LOC101750586	NC_006099.4	11518902	11522856	+	0	0	NA	0	0	0	0	1	NA	NA
LOC101750588	NC_006112.3	1832750	1837666	-	0	0	NA	0	0	0	0	1	NA	NA
LOC101750594	NC_006093.4	17836361	17840476	+	0	0	NA	0	0	0	0	1	NA	NA
LOC101750603	NC_006095.4	26778693	26788823	-	0	0	NA	0	0	0	0	1	NA	NA
LOC101750621	NC_006091.4	9376389	9380320	-	0	0	NA	0	0	0	0	1	>200	0
LOC101750734	NC_006088.4	194862099	194864928	+	0	0	NA	0	0	0	0	1	NA	NA
LOC101750757	NC_006112.3	1296055	1297931	+	0	0	NA	0	0	0	0	1	NA	NA
LOC101750762	NC_006091.4	16649732	16652035	+	0	0	NA	0	0	0	0	1	NA	NA
LOC101750770	NC_006127.4	67855243	67863005	-	0	0	NA	0	0	0	0	1	NA	NA
LOC101750794	NC_006088.4	194850463	194854371	+	0	0	NA	0	0	0	0	1	NA	NA
LOC101750797	NC_006114.4	224224	584730	-	0	0	NA	0	0	0	0	1	NA	NA
LOC101750811	NC_006109.4	25925	29970	-	0	0	NA	0	0	0	0	1	NA	NA
LOC101750836	NC_006097.4	753930	754904	+	0	0	NA	0	0	0	0	1	NA	NA
LOC101750863	NC_006111.4	4202840	4207235	+	0	0	NA	0	0	0	0	1	NA	NA
LOC101750872	NC_006114.4	378419	382678	-	0	0	NA	0	0	0	0	1	NA	NA
LOC101750889	NC_006115.4	768531	772215	+	0	0	NA	0	0	0	0	1	NA	NA
LOC101750908	NC_006112.3	1323643	1330948	+	0	0	NA	0	0	0	0	1	NA	NA
LOC101750933	NC_006127.4	60973662	60976790	-	0	0	NA	0	0	0	0	1	NA	NA
LOC101750937	NC_006114.4	807203	810694	-	0	0	NA	0	0	0	0	1	NA	NA
LOC101750973	NC_006127.4	34338726	34342847	-	0	0	NA	0	0	0	0	1	>200	0
LOC101750992	NC_006115.4	776712	780961	-	0	0	NA	0	0	0	0	1	NA	NA
LOC101750993	NC_006115.4	2881529	2883849	+	0	0	NA	0	0	0	0	1	>200	0
LOC101751070	NC_006109.4	258838	262789	-	0	0	NA	0	0	0	0	1	NA	NA
LOC101751098	NC_008466.3	199889	202054	+	0	0	NA	0	0	0	0	1	NA	NA
LOC101751153	NC_008466.3	194622	216756	+	0	0	NA	0	0	0	0	1	NA	NA
LOC101751162	NC_006112.3	1148589	1150441	-	0	0	NA	0	0	0	0	1	NA	NA
LOC101751192	NC_008465.3	776347	783507	-	0	0	NA	0	0	0	0	1	NA	NA
LOC101751222	NC_006112.3	1159110	1161256	+	0	0	NA	0	0	0	0	1	NA	NA
LOC101751279	NC_006112.3	1154359	1157611	-	0	0	NA	0	0	0	0	1	NA	NA
LOC101751305	NC_008466.3	253220	270539	+	0	0	NA	0	0	0	0	1	NA	NA
LOC101751362	NC_006099.4	2707870	2712697	+	0	0	NA	0	0	0	0	1	NA	NA
LOC101751389	NC_006092.4	52035088	52040862	+	0	0	NA	0	0	0	0	1	NA	NA
LOC101751418	NC_006091.4	50242200	50249421	-	0	0	NA	0	0	0	0	1	NA	NA
LOC101751474	NC_006115.4	2776009	2779434	-	0	0	NA	0	0	0	0	1	>200	0
LOC101751481	NC_006102.4	10858447	10861149	+	0	0	NA	0	0	0	0	1	NA	NA
LOC101751554	NC_006112.3	1040076	1040849	-	0	0	NA	0	0	0	0	1	NA	NA
LOC101751598	NC_006115.4	1883594	1894300	-	0	0	NA	0	0	0	0	1	NA	NA
LOC101751600	NC_006089.4	149246082	149250433	+	0	0	NA	0	0	0	0	1	NA	NA
LOC101751605	NC_006092.4	250194	261729	+	0	0	NA	0	0	0	0	1	NA	NA
LOC101751614	NC_006112.3	1098677	1100340	-	0	0	NA	0	0	0	0	1	NA	NA
LOC101751615	NC_006112.3	2398382	2402350	+	0	0	NA	0	0	0	0	1	NA	NA
LOC101751647	NC_006089.4	980728	989602	+	0	0	NA	0	0	0	0	1	NA	NA
LOC101751678	NC_006112.3	1173597	1177833	+	0	0	NA	0	0	0	0	1	NA	NA
LOC101751679	NC_006112.3	2394867	2398327	-	0	0	NA	0	0	0	0	1	NA	NA
LOC101751691	NC_006098.4	1773523	1776079	+	0	0	NA	0	0	0	0	1	>200	0
LOC101751703	NC_006115.4	49048	52643	+	0	0	NA	0	0	0	0	1	NA	NA
LOC101751709	NC_006099.4	9126910	9129276	+	0	0	NA	0	0	0	0	1	NA	NA
LOC101751715	NC_006107.4	10695917	10697222	-	0	0	NA	0	0	0	0	1	>200	0
LOC101751717	NC_006111.4	4281057	4284324	-	0	0	NA	0	0	0	0	1	NA	NA
LOC101751752	NC_006092.4	16853454	16857290	+	0	0	NA	0	0	0	0	1	NA	NA
LOC101751813	NC_006114.4	624438	626417	-	0	0	NA	0	0	0	0	1	NA	NA
LOC101751844	NC_006089.4	370343	378174	-	0	0	NA	0	0	0	0	1	NA	NA
LOC101751860	NC_006090.4	105008806	105013183	+	0	0	NA	0	0	0	0	1	NA	NA
LOC101751880	NC_006104.4	675237	678443	+	0	0	NA	0	0	0	0	1	NA	NA
LOC101751906	NC_006107.4	10726657	10729791	-	0	0	NA	0	0	0	0	1	NA	NA
LOC101751912	NC_008466.3	342700	367888	+	0	0	NA	0	0	0	0	1	NA	NA
LOC101751964	NC_006127.4	73408803	73416000	+	0	0	NA	0	0	0	0	1	NA	NA
LOC101751968	NC_008466.3	174455	176495	+	0	0	NA	0	0	0	0	1	NA	NA
LOC101752016	NC_006088.4	1848706	1850489	+	0	0	NA	0	0	0	0	1	NA	NA
LOC101752022	NC_006088.4	123451424	123455510	+	0	0	NA	0	0	0	0	1	NA	NA
LOC101752024	NC_006088.4	79362813	79379539	+	0	0	NA	0	0	0	0	1	NA	NA
LOC101752065	NC_006090.4	105814397	105823794	-	0	0	NA	0	0	0	0	1	NA	NA
LOC101752152	NC_008466.3	526475	542687	-	0	0	NA	0	0	0	0	1	NA	NA
LOC101752166	NC_006102.4	10916272	10919485	+	0	0	NA	0	0	0	0	1	NA	NA
LOC101752207	NC_006127.4	73438086	73444928	+	0	0	NA	0	0	0	0	1	NA	NA
LOC101752219	NC_006107.4	5316401	5317206	+	0	0	NA	0	0	0	0	1	NA	NA
LOC101752245	NC_006112.3	2499575	2501683	+	0	0	NA	0	0	0	0	1	NA	NA
LOC101752276	NC_006099.4	2855504	2857228	-	0	0	NA	0	0	0	0	1	NA	NA
LOC101752289	NC_006099.4	11515182	11519148	+	0	0	NA	0	0	0	0	1	NA	NA
LOC101752313	NC_006127.4	8467219	8469390	-	0	0	NA	0	0	0	0	1	NA	NA
LOC107048989	NC_006089.4	298455	301712	-	0	0	NA	0	0	0	0	1	NA	NA
LOC107048991	NC_006088.4	78146240	78149736	+	0	0	NA	0	0	0	0	1	NA	NA
LOC107049000	NC_008466.3	444532	453375	-	0	0	NA	0	0	0	0	1	NA	NA
LOC107049017	NC_006088.4	194871434	194873091	+	0	0	NA	0	0	0	0	1	NA	NA
LOC107049019	NC_006093.4	31408988	31429375	+	0	0	NA	0	0	0	0	1	>200	0
LOC107049020	NC_006108.4	5894457	5897256	-	0	0	NA	0	0	0	0	1	NA	NA
LOC107049024	NC_006112.3	1139306	1142301	+	0	0	NA	0	0	0	0	1	NA	NA
LOC107049025	NC_006112.3	2023424	2024386	+	0	0	NA	0	0	0	0	1	NA	NA
LOC107049026	NC_006112.3	2027847	2028770	+	0	0	NA	0	0	0	0	1	NA	NA
LOC107049028	NC_006114.4	836471	837684	+	0	0	NA	0	0	0	0	1	NA	NA
LOC107049037	NC_006097.4	705678	706637	-	0	0	NA	0	0	0	0	1	NA	NA
LOC107049043	NC_006094.4	4572436	4573944	+	0	0	NA	0	0	0	0	1	NA	NA
LOC107049046	NC_006126.4	2000273	2003732	+	0	0	NA	0	0	0	0	1	NA	NA
LOC107049050	NC_006088.4	54783944	54785716	-	0	0	NA	0	0	0	0	1	NA	NA
LOC107049059	NC_006114.4	821387	822603	+	0	0	NA	0	0	0	0	1	NA	NA
LOC107049060	NC_006088.4	194574892	194576539	+	0	0	NA	0	0	0	0	1	NA	NA
LOC107049066	NC_006088.4	194627965	194634273	-	0	0	NA	0	0	0	0	1	>200	0
LOC107049077	NC_006088.4	194255597	194257837	+	0	0	NA	0	0	0	0	1	NA	NA
LOC107049089	NC_008465.3	767973	769358	+	0	0	NA	0	0	0	0	1	NA	NA
LOC107049090	NC_006100.4	554191	558420	-	0	0	NA	0	0	0	0	1	NA	NA
LOC107049114	NC_006103.4	388141	390639	-	0	0	NA	0	0	0	0	1	NA	NA
LOC107049117	NC_006114.4	66251	68943	-	0	0	NA	0	0	0	0	1	NA	NA
LOC107049124	NC_006103.4	404459	408470	-	0	0	NA	0	0	0	0	1	NA	NA
LOC107049129	NC_006092.4	397492	400845	+	0	0	NA	0	0	0	0	1	NA	NA
LOC107049133	NC_006127.4	64220941	64222408	-	0	0	NA	0	0	0	0	1	NA	NA
LOC107049135	NC_006127.4	68059765	68065629	-	0	0	NA	0	0	0	0	1	NA	NA
LOC107049143	NC_006103.4	461986	463446	+	0	0	NA	0	0	0	0	1	NA	NA
LOC107049153	NC_006127.4	73416531	73421851	+	0	0	NA	0	0	0	0	1	NA	NA
LOC107049154	NC_006127.4	64652315	64653913	+	0	0	NA	0	0	0	0	1	NA	NA
LOC107049155	NC_006127.4	64672919	64674517	-	0	0	NA	0	0	0	0	1	>200	0
LOC107049156	NC_008466.3	228484	236633	+	0	0	NA	0	0	0	0	1	NA	NA
LOC107049159	NC_006127.4	34323619	34325425	-	0	0	NA	0	0	0	0	1	>200	0
LOC107049163	NC_006091.4	86336137	86354806	-	0	0	NA	0	0	0	0	1	NA	NA
LOC107049164	NC_006098.4	1121876	1124353	-	0	0	NA	0	0	0	0	1	NA	NA
LOC107049168	NC_006091.4	86355397	86359519	-	0	0	NA	0	0	0	0	1	NA	NA
LOC107049173	NC_006104.4	700878	704084	-	0	0	NA	0	0	0	0	1	NA	NA
LOC107049176	NC_006088.4	87598641	87600334	+	0	0	NA	0	0	0	0	1	NA	NA
LOC107049180	NC_006088.4	1877557	1880154	+	0	0	NA	0	0	0	0	1	>200	0
LOC107049191	NC_006103.4	370753	373182	-	0	0	NA	0	0	0	0	1	NA	NA
LOC107049196	NC_006091.4	86389368	86427807	-	0	0	NA	0	0	0	0	1	NA	NA
LOC107049198	NC_006092.4	16866933	16870274	+	0	0	NA	0	0	0	0	1	NA	NA
LOC107049199	NC_006092.4	16858823	16863114	+	0	0	NA	0	0	0	0	1	NA	NA
LOC107049200	NC_006091.4	86379049	86381866	-	0	0	NA	0	0	0	0	1	NA	NA
LOC107049201	NC_008466.3	299285	313985	+	0	0	NA	0	0	0	0	1	NA	NA
LOC107049456	NC_006088.4	116838941	116839745	-	0	0	NA	0	0	0	0	1	NA	NA
LOC107049810	NC_006088.4	122999058	123002819	+	0	0	NA	0	0	0	0	1	NA	NA
LOC107049820	NC_006088.4	123002718	123004888	+	0	0	NA	0	0	0	0	1	NA	NA
LOC107049960	NC_006088.4	124398419	124407316	-	0	0	NA	0	0	0	0	1	NA	NA
LOC107051575	NC_006102.4	7223756	7224975	+	0	0	NA	0	0	0	0	1	NA	NA
LOC107051599	NC_006102.4	5986558	5988964	+	0	0	NA	0	0	0	0	1	NA	NA
LOC107051618	NC_006102.4	504945	505612	-	0	0	NA	0	0	0	0	1	>200	0
LOC107051647	NC_006089.4	56306263	56310885	+	0	0	NA	0	0	0	0	1	NA	NA
LOC107051673	NC_006089.4	55878241	55879397	-	0	0	NA	0	0	0	0	1	NA	NA
LOC107051674	NC_006089.4	63419102	63420126	-	0	0	NA	0	0	0	0	1	NA	NA
LOC107051813	NC_006092.4	58250311	58253333	+	0	0	NA	0	0	0	0	1	>200	0
LOC107051816	NC_006092.4	59048827	59052279	-	0	0	NA	0	0	0	0	1	NA	NA
LOC107051857	NC_006096.4	5486064	5488458	+	0	0	NA	0	0	0	0	1	>200	0
LOC107051858	NC_006096.4	5274561	5280080	+	0	0	NA	0	0	0	0	1	NA	NA
LOC107051923	NC_006127.4	8478515	8480901	-	0	0	NA	0	0	0	0	1	NA	NA
LOC107052090	NC_006091.4	14204023	14207185	+	0	0	NA	0	0	0	0	1	NA	NA
LOC107052113	NC_006093.4	9283116	9284661	+	0	0	NA	0	0	0	0	1	NA	NA
LOC107052135	NC_006097.4	2515055	2517901	-	0	0	NA	0	0	0	0	1	>200	0
LOC107052136	NC_006097.4	2269370	2270897	+	0	0	NA	0	0	0	0	1	>200	0
LOC107052143	NC_006097.4	713239	714806	+	0	0	NA	0	0	0	0	1	NA	NA
LOC107052152	NC_006097.4	2553904	2555186	+	0	0	NA	0	0	0	0	1	NA	NA
LOC107052172	NC_006104.4	2058181	2058633	-	0	0	NA	0	0	0	0	1	NA	NA
LOC107052202	NC_006088.4	171967799	171968774	+	0	0	NA	0	0	0	0	1	NA	NA
LOC107052256	NC_006112.3	2570713	2573739	-	0	0	NA	0	0	0	0	1	NA	NA
LOC107052257	NC_006127.4	25670268	25681174	-	0	0	NA	0	0	0	0	1	NA	NA
LOC107052302	NC_006127.4	25666768	25671961	-	0	0	NA	0	0	0	0	1	NA	NA
LOC107052305	NC_006127.4	34293152	34295097	-	0	0	NA	0	0	0	0	1	>200	0
LOC107052307	NC_006127.4	37934132	37935461	-	0	0	NA	0	0	0	0	1	NA	NA
LOC107052348	NC_006127.4	53256615	53261128	+	0	0	NA	0	0	0	0	1	NA	NA
LOC107052372	NC_006127.4	60987231	60988933	-	0	0	NA	0	0	0	0	1	NA	NA
LOC107052374	NC_006127.4	67256947	67259420	-	0	0	NA	0	0	0	0	1	NA	NA
LOC107052375	NC_006127.4	67959809	67968111	-	0	0	NA	0	0	0	0	1	NA	NA
LOC107052376	NC_006127.4	67998237	68003549	-	0	0	NA	0	0	0	0	1	NA	NA
LOC107052377	NC_006127.4	68040874	68046736	-	0	0	NA	0	0	0	0	1	NA	NA
LOC107052379	NC_006127.4	68079137	68084999	-	0	0	NA	0	0	0	0	1	NA	NA
LOC107052381	NC_006127.4	71073493	71076459	-	0	0	NA	0	0	0	0	1	NA	NA
LOC107052383	NC_006127.4	73478395	73482049	+	0	0	NA	0	0	0	0	1	NA	NA
LOC107052384	NC_006127.4	73482098	73486011	+	0	0	NA	0	0	0	0	1	NA	NA
LOC107052385	NC_006127.4	73516329	73520988	+	0	0	NA	0	0	0	0	1	NA	NA
LOC107052394	NC_006127.4	67957275	67959752	-	0	0	NA	0	0	0	0	1	NA	NA
LOC107052395	NC_006127.4	67977381	67979858	-	0	0	NA	0	0	0	0	1	NA	NA
LOC107052397	NC_006127.4	68057382	68059850	-	0	0	NA	0	0	0	0	1	NA	NA
LOC107052415	NC_006127.4	73455671	73459064	+	0	0	NA	0	0	0	0	1	NA	NA
LOC107052416	NC_006127.4	73454488	73455255	+	0	0	NA	0	0	0	0	1	NA	NA
LOC107052420	NC_006127.4	73505907	73507630	+	0	0	NA	0	0	0	0	1	NA	NA
LOC107052425	NC_006127.4	67250822	67253611	-	0	0	NA	0	0	0	0	1	NA	NA
LOC107052430	NC_006127.4	82008553	82009835	-	0	0	NA	0	0	0	0	1	NA	NA
LOC107052439	NC_006127.4	82025112	82026434	-	0	0	NA	0	0	0	0	1	NA	NA
LOC107052441	NC_006127.4	82134561	82136537	-	0	0	NA	0	0	0	0	1	NA	NA
LOC107052442	NC_006127.4	82281292	82282607	-	0	0	NA	0	0	0	0	1	NA	NA
LOC107052443	NC_006127.4	82094946	82096231	-	0	0	NA	0	0	0	0	1	NA	NA
LOC107052444	NC_006127.4	82171370	82192131	-	0	0	NA	0	0	0	0	1	NA	NA
LOC107052445	NC_006127.4	82244413	82245736	-	0	0	NA	0	0	0	0	1	NA	NA
LOC107052446	NC_006127.4	82297891	82299195	-	0	0	NA	0	0	0	0	1	NA	NA
LOC107052447	NC_006127.4	82224091	82225406	-	0	0	NA	0	0	0	0	1	NA	NA
LOC107052453	NC_006088.4	194245633	194247791	+	0	0	NA	0	0	0	0	1	NA	NA
LOC107052456	NC_006088.4	194420220	194423661	+	0	0	NA	0	0	0	0	1	NA	NA
LOC107052459	NC_006088.4	194400110	194402784	-	0	0	NA	0	0	0	0	1	NA	NA
LOC107052463	NC_006088.4	194646519	194647830	-	0	0	NA	0	0	0	0	1	NA	NA
LOC107052464	NC_006088.4	194668034	194674956	-	0	0	NA	0	0	0	0	1	NA	NA
LOC107052466	NC_006088.4	194845376	194847022	+	0	0	NA	0	0	0	0	1	NA	NA
LOC107052478	NC_006089.4	368585	370240	-	0	0	NA	0	0	0	0	1	NA	NA
LOC107052479	NC_006089.4	4966016	4971927	-	0	0	NA	0	0	0	0	1	>200	0
LOC107052489	NC_006089.4	524955	530751	+	0	0	NA	0	0	0	0	1	NA	NA
LOC107052491	NC_006089.4	402278	404998	-	0	0	NA	0	0	0	0	1	NA	NA
LOC107052492	NC_006089.4	975384	977482	+	0	0	NA	0	0	0	0	1	NA	NA
LOC107052493	NC_006089.4	970402	972493	+	0	0	NA	0	0	0	0	1	NA	NA
LOC107052502	NC_006089.4	49203031	49207183	-	0	0	NA	0	0	0	0	1	>200	0
LOC107052534	NC_006089.4	40618660	40621568	+	0	0	NA	0	0	0	0	1	NA	NA
LOC107052555	NC_006088.4	664161	670373	+	0	0	NA	0	0	0	0	1	NA	NA
LOC107052586	NC_006088.4	33606519	33608774	-	0	0	NA	0	0	0	0	1	NA	NA
LOC107052803	NC_006089.4	149125699	149134077	+	0	0	NA	0	0	0	0	1	NA	NA
LOC107052804	NC_006089.4	149148622	149149008	+	0	0	NA	0	0	0	0	1	NA	NA
LOC107052805	NC_006089.4	149078748	149089821	+	0	0	NA	0	0	0	0	1	NA	NA
LOC107052806	NC_006089.4	149062733	149066453	+	0	0	NA	0	0	0	0	1	NA	NA
LOC107052808	NC_006089.4	149144710	149153032	+	0	0	NA	0	0	0	0	1	NA	NA
LOC107052809	NC_006089.4	149102983	149110808	+	0	0	NA	0	0	0	0	1	NA	NA
LOC107052810	NC_006089.4	149093005	149107040	+	0	0	NA	0	0	0	0	1	NA	NA
LOC107052811	NC_006089.4	149081851	149082732	+	0	0	NA	0	0	0	0	1	NA	NA
LOC107052812	NC_006089.4	149102910	149103557	+	0	0	NA	0	0	0	0	1	NA	NA
LOC107052813	NC_006089.4	149117146	149117762	+	0	0	NA	0	0	0	0	1	NA	NA
LOC107052814	NC_006089.4	149078773	149079398	+	0	0	NA	0	0	0	0	1	NA	NA
LOC107052815	NC_006089.4	149121184	149121521	+	0	0	NA	0	0	0	0	1	NA	NA
LOC107052816	NC_006089.4	149144737	149145458	+	0	0	NA	0	0	0	0	1	NA	NA
LOC107052817	NC_006089.4	149069549	149070154	+	0	0	NA	0	0	0	0	1	NA	NA
LOC107052818	NC_006089.4	149141523	149141943	+	0	0	NA	0	0	0	0	1	NA	NA
LOC107052820	NC_006089.4	149052104	149052706	-	0	0	NA	0	0	0	0	1	NA	NA
LOC107052821	NC_006089.4	149028792	149044211	-	0	0	NA	0	0	0	0	1	NA	NA
LOC107052832	NC_006089.4	149533002	149552137	-	0	0	NA	0	0	0	0	1	>200	0
LOC107052833	NC_006089.4	149558623	149560670	-	0	0	NA	0	0	0	0	1	NA	NA
LOC107053040	NC_006090.4	41933865	41937021	-	0	0	NA	0	0	0	0	1	NA	NA
LOC107053100	NC_006090.4	68132650	68134630	-	0	0	NA	0	0	0	0	1	NA	NA
LOC107053127	NC_006090.4	85984736	85986221	+	0	0	NA	0	0	0	0	1	NA	NA
LOC107053159	NC_006088.4	1645246	1648783	+	0	0	NA	0	0	0	0	1	NA	NA
LOC107053164	NC_006090.4	102187197	102191780	-	0	0	NA	0	0	0	0	1	NA	NA
LOC107053168	NC_006090.4	105030903	105035019	-	0	0	NA	0	0	0	0	1	NA	NA
LOC107053186	NC_006090.4	105638656	105645207	-	0	0	NA	0	0	0	0	1	NA	NA
LOC107053190	NC_006090.4	105036572	105044400	-	0	0	NA	0	0	0	0	1	NA	NA
LOC107053220	NC_006091.4	25092846	25094330	+	0	0	NA	0	0	0	0	1	NA	NA
LOC107053269	NC_006091.4	60356942	60361461	-	0	0	NA	0	0	0	0	1	NA	NA
LOC107053306	NC_006091.4	86290810	86294626	-	0	0	NA	0	0	0	0	1	NA	NA
LOC107053307	NC_006091.4	86405407	86409093	-	0	0	NA	0	0	0	0	1	NA	NA
LOC107053308	NC_006091.4	86325306	86328983	-	0	0	NA	0	0	0	0	1	NA	NA
LOC107053324	NC_006091.4	86287064	86288761	-	0	0	NA	0	0	0	0	1	NA	NA
LOC107053337	NC_006092.4	1537	6270	+	0	0	NA	0	0	0	0	1	NA	NA
LOC107053340	NC_006092.4	20060	22013	+	0	0	NA	0	0	0	0	1	NA	NA
LOC107053341	NC_006092.4	6508	9798	-	0	0	NA	0	0	0	0	1	NA	NA
LOC107053353	NC_006092.4	1554391	1556267	+	0	0	NA	0	0	0	0	1	NA	NA
LOC107053361	NC_006092.4	984758	986144	-	0	0	NA	0	0	0	0	1	NA	NA
LOC107053414	NC_006092.4	14695231	14715274	-	0	0	NA	0	0	0	0	1	NA	NA
LOC107053417	NC_006092.4	16055048	16056174	-	0	0	NA	0	0	0	0	1	>200	0
LOC107053424	NC_006092.4	16865049	16867644	+	0	0	NA	0	0	0	0	1	NA	NA
LOC107053436	NC_006092.4	16887126	16888996	-	0	0	NA	0	0	0	0	1	NA	NA
LOC107053468	NC_006088.4	59251517	59255347	+	0	0	NA	0	0	0	0	1	NA	NA
LOC107053470	NC_006088.4	59247664	59250459	+	0	0	NA	0	0	0	0	1	NA	NA
LOC107053478	NC_006088.4	112848	115376	-	0	0	NA	0	0	0	0	1	NA	NA
LOC107053607	NC_006092.4	57020758	57023632	+	0	0	NA	0	0	0	0	1	NA	NA
LOC107053612	NC_006093.4	514988	525380	+	0	0	NA	0	0	0	0	1	NA	NA
LOC107053663	NC_006088.4	1898694	1899935	+	0	0	NA	0	0	0	0	1	>200	0
LOC107053683	NC_006088.4	1869898	1871678	+	0	0	NA	0	0	0	0	1	NA	NA
LOC107053689	NC_006088.4	1943661	1946673	-	0	0	NA	0	0	0	0	1	NA	NA
LOC107053701	NC_006088.4	1921154	1923277	+	0	0	NA	0	0	0	0	1	NA	NA
LOC107053714	NC_006093.4	31379129	31391543	+	0	0	NA	0	0	0	0	1	NA	NA
LOC107053715	NC_006093.4	31396347	31405740	+	0	0	NA	0	0	0	0	1	NA	NA
LOC107053749	NC_006088.4	1923259	1925100	+	0	0	NA	0	0	0	0	1	NA	NA
LOC107053764	NC_006088.4	1916410	1918088	+	0	0	NA	0	0	0	0	1	NA	NA
LOC107053766	NC_006094.4	6897027	6899426	+	0	0	NA	0	0	0	0	1	NA	NA
LOC107053797	NC_006094.4	13949674	13955948	+	0	0	NA	0	0	0	0	1	NA	NA
LOC107053803	NC_006088.4	48119616	48120233	-	0	0	NA	0	0	0	0	1	NA	NA
LOC107053832	NC_006094.4	22168908	22170890	-	0	0	NA	0	0	0	0	1	>200	0
LOC107053921	NC_006088.4	1954730	1957209	-	0	0	NA	0	0	0	0	1	NA	NA
LOC107053946	NC_006095.4	8077566	8081738	-	0	0	NA	0	0	0	0	1	NA	NA
LOC107053947	NC_006095.4	8103802	8106557	+	0	0	NA	0	0	0	0	1	NA	NA
LOC107053948	NC_006095.4	8083952	8088272	+	0	0	NA	0	0	0	0	1	NA	NA
LOC107053967	NC_006088.4	71398883	71400563	-	0	0	NA	0	0	0	0	1	NA	NA
LOC107053994	NC_006088.4	71422532	71428868	-	0	0	NA	0	0	0	0	1	NA	NA
LOC107054002	NC_006088.4	69875749	69879286	+	0	0	NA	0	0	0	0	1	NA	NA
LOC107054007	NC_006088.4	69871933	69875470	+	0	0	NA	0	0	0	0	1	NA	NA
LOC107054009	NC_006088.4	69868088	69871658	+	0	0	NA	0	0	0	0	1	NA	NA
LOC107054074	NC_006096.4	15173298	15176771	+	0	0	NA	0	0	0	0	1	NA	NA
LOC107054077	NC_006096.4	15732585	15738389	-	0	0	NA	0	0	0	0	1	NA	NA
LOC107054165	NC_006097.4	672860	674307	+	0	0	NA	0	0	0	0	1	NA	NA
LOC107054166	NC_006097.4	646813	648257	+	0	0	NA	0	0	0	0	1	NA	NA
LOC107054167	NC_006097.4	649264	655910	+	0	0	NA	0	0	0	0	1	NA	NA
LOC107054168	NC_006097.4	635633	642242	+	0	0	NA	0	0	0	0	1	NA	NA
LOC107054169	NC_006097.4	666809	668290	+	0	0	NA	0	0	0	0	1	NA	NA
LOC107054205	NC_006088.4	2046806	2048582	-	0	0	NA	0	0	0	0	1	NA	NA
LOC107054210	NC_006088.4	62512382	62517161	-	0	0	NA	0	0	0	0	1	NA	NA
LOC107054221	NC_006097.4	20159593	20160380	-	0	0	NA	0	0	0	0	1	NA	NA
LOC107054223	NC_006097.4	20087244	20088275	+	0	0	NA	0	0	0	0	1	NA	NA
LOC107054228	NC_006088.4	2058419	2061475	-	0	0	NA	0	0	0	0	1	NA	NA
LOC107054330	NC_006098.4	18696540	18698959	+	0	0	NA	0	0	0	0	1	NA	NA
LOC107054334	NC_006098.4	19086099	19087230	+	0	0	NA	0	0	0	0	1	NA	NA
LOC107054335	NC_006088.4	2048592	2050795	-	0	0	NA	0	0	0	0	1	NA	NA
LOC107054350	NC_006099.4	1443005	1444750	-	0	0	NA	0	0	0	0	1	NA	NA
LOC107054358	NC_006099.4	1106745	1109334	-	0	0	NA	0	0	0	0	1	NA	NA
LOC107054360	NC_006099.4	2720457	2722794	+	0	0	NA	0	0	0	0	1	NA	NA
LOC107054362	NC_006088.4	2849511	2850914	-	0	0	NA	0	0	0	0	1	NA	NA
LOC107054367	NC_006099.4	2850730	2851728	-	0	0	NA	0	0	0	0	1	NA	NA
LOC107054368	NC_006099.4	2844756	2846720	-	0	0	NA	0	0	0	0	1	NA	NA
LOC107054394	NC_006099.4	19811973	19816696	+	0	0	NA	0	0	0	0	1	NA	NA
LOC107054425	NC_006099.4	11620960	11622387	+	0	0	NA	0	0	0	0	1	NA	NA
LOC107054458	NC_006099.4	3274723	3279436	-	0	0	NA	0	0	0	0	1	NA	NA
LOC107054459	NC_006099.4	3268027	3272672	-	0	0	NA	0	0	0	0	1	NA	NA
LOC107054460	NC_006100.4	514853	519280	-	0	0	NA	0	0	0	0	1	NA	NA
LOC107054461	NC_006100.4	503395	507327	-	0	0	NA	0	0	0	0	1	NA	NA
LOC107054462	NC_006100.4	530597	534636	-	0	0	NA	0	0	0	0	1	NA	NA
LOC107054464	NC_006100.4	587028	589408	-	0	0	NA	0	0	0	0	1	NA	NA
LOC107054465	NC_006100.4	617645	623101	-	0	0	NA	0	0	0	0	1	NA	NA
LOC107054466	NC_006100.4	594133	610217	-	0	0	NA	0	0	0	0	1	NA	NA
LOC107054467	NC_006100.4	594035	598706	-	0	0	NA	0	0	0	0	1	NA	NA
LOC107054468	NC_006100.4	629394	634052	-	0	0	NA	0	0	0	0	1	NA	NA
LOC107054473	NC_006100.4	956736	963598	+	0	0	NA	0	0	0	0	1	NA	NA
LOC107054479	NC_006100.4	1686975	1691583	+	0	0	NA	0	0	0	0	1	NA	NA
LOC107054480	NC_006100.4	1730643	1734872	+	0	0	NA	0	0	0	0	1	NA	NA
LOC107054481	NC_006100.4	1702333	1705278	+	0	0	NA	0	0	0	0	1	NA	NA
LOC107054483	NC_006100.4	1714928	1718226	+	0	0	NA	0	0	0	0	1	NA	NA
LOC107054485	NC_006100.4	1741731	1754226	+	0	0	NA	0	0	0	0	1	NA	NA
LOC107054486	NC_006100.4	1763395	1769269	+	0	0	NA	0	0	0	0	1	NA	NA
LOC107054488	NC_006100.4	1782975	1787745	+	0	0	NA	0	0	0	0	1	NA	NA
LOC107054567	NC_006088.4	78112687	78116269	-	0	0	NA	0	0	0	0	1	NA	NA
LOC107054568	NC_006088.4	78133527	78137394	-	0	0	NA	0	0	0	0	1	NA	NA
LOC107054570	NC_006088.4	78169317	78171165	+	0	0	NA	0	0	0	0	1	NA	NA
LOC107054572	NC_006088.4	78183995	78190303	+	0	0	NA	0	0	0	0	1	NA	NA
LOC107054581	NC_006101.4	10148867	10159037	+	0	0	NA	0	0	0	0	1	>200	0
LOC107054653	NC_006101.4	13662990	13669973	+	0	0	NA	0	0	0	0	1	NA	NA
LOC107054654	NC_006101.4	13674419	13684269	+	0	0	NA	0	0	0	0	1	NA	NA
LOC107054656	NC_006101.4	14316471	14318947	-	0	0	NA	0	0	0	0	1	NA	NA
LOC107054658	NC_006101.4	13689347	13692518	+	0	0	NA	0	0	0	0	1	NA	NA
LOC107054665	NC_006101.4	15534747	15535911	+	0	0	NA	0	0	0	0	1	NA	NA
LOC107054668	NC_006102.4	11167861	11170365	+	0	0	NA	0	0	0	0	1	NA	NA
LOC107054679	NC_006102.4	11174357	11176017	+	0	0	NA	0	0	0	0	1	>200	0
LOC107054696	NC_006103.4	299036	304109	-	0	0	NA	0	0	0	0	1	NA	NA
LOC107054697	NC_006103.4	304530	306548	+	0	0	NA	0	0	0	0	1	NA	NA
LOC107054704	NC_006103.4	490650	493519	-	0	0	NA	0	0	0	0	1	NA	NA
LOC107054706	NC_006103.4	403004	404488	+	0	0	NA	0	0	0	0	1	NA	NA
LOC107054716	NC_006104.4	527324	537870	-	0	0	NA	0	0	0	0	1	NA	NA
LOC107054761	NC_006106.4	6775504	6777411	-	0	0	NA	0	0	0	0	1	NA	NA
LOC107054771	NC_006106.4	37881	39380	+	0	0	NA	0	0	0	0	1	NA	NA
LOC107054772	NC_006106.4	40410	45494	+	0	0	NA	0	0	0	0	1	NA	NA
LOC107054773	NC_006106.4	56922	60333	+	0	0	NA	0	0	0	0	1	NA	NA
LOC107054790	NC_006106.4	4783988	4786207	+	0	0	NA	0	0	0	0	1	NA	NA
LOC107054791	NC_006106.4	4860709	4872165	-	0	0	NA	0	0	0	0	1	NA	NA
LOC107054802	NC_006106.4	5751720	5753041	-	0	0	NA	0	0	0	0	1	NA	NA
LOC107054816	NC_006107.4	1450510	1455307	-	0	0	NA	0	0	0	0	1	NA	NA
LOC107054817	NC_006107.4	1476548	1480613	-	0	0	NA	0	0	0	0	1	NA	NA
LOC107054818	NC_006107.4	1483361	1489327	-	0	0	NA	0	0	0	0	1	NA	NA
LOC107054819	NC_006107.4	1493886	1498047	-	0	0	NA	0	0	0	0	1	NA	NA
LOC107054848	NC_006107.4	10710542	10711962	-	0	0	NA	0	0	0	0	1	NA	NA
[truncated: 13,543 more rows]

## Sheet: Oscine Clade
Gene	Chromosome	Start	End	Strand	AR	CE	Q-score	Exonic AR	Noncoding AR	Exonic CE	Noncoding CE	Hypergeometric	Rank	ARCHS Vocalization Behavior Rank	ARCHS Vocalization Behavior Z-Score
ARRDC3	NC_006127.4	59332514	59346072	+	137	423	0	0	137	7	416	0	1	172	2.59514
NR2F1	NC_006127.4	58374141	58383484	-	131	406	0	0	131	3	403	0	2	1	5.831
MEF2C	NC_006127.4	60303678	60440726	+	129	304	0	3	126	20	284	0	3	5	6.254
CETN3	NC_006127.4	59736140	59752762	+	97	231	0	0	97	4	227	0	4	>200	0
FAM172A	NC_006127.4	58092017	58355900	+	60	194	0	0	60	5	189	0	5	116	2.5927
PCDH10	NC_006091.4	27094884	27133196	+	42	411	0	0	42	8	403	0	6	3	5.28389
LOC107052356	NC_006127.4	58370199	58373194	-	34	117	0	0	34	1	116	0	7	>200	0
CBR4	NC_006091.4	25755958	25763029	+	30	192	0	0	30	3	189	0	8	>200	0
LOC107052366	NC_006127.4	60454151	60456750	+	29	55	0	0	29	0	55	0	9	>200	0
NEUROD6	NC_006089.4	48800907	48804986	+	29	91	0	0	29	6	85	0	10	3	5.55794
PHF21B	NC_006088.4	69989617	70057583	-	29	107	0	2	27	9	98	0	11	46	3.09529
ANKRD32	NC_006127.4	57807565	57848705	-	27	85	0	1	26	5	80	0	12	>200	0
KIAA0825	NC_006127.4	57848729	58078152	+	24	76	0	4	20	21	55	0	13	>200	0
SLC7A11	NC_006091.4	29138177	29196482	-	22	117	0	0	22	6	111	0	14	>200	0
MCTP1	NC_006127.4	57530563	57796560	+	21	61	0	1	20	8	53	0	15	25	4.04133
CCDC129	NC_006089.4	48692959	48742199	-	18	42	0	0	18	4	38	0	16	>200	0
PPP1R17	NC_006089.4	48651539	48669862	-	16	32	0	0	16	1	31	0	17	41	4.36946
PDE1C	NC_006089.4	48296568	48648761	+	12	26	0	3	9	10	16	3.10862e-15	18	143	2.60359
NUP50	NC_006088.4	70276350	70292397	+	16	67	0	0	16	2	65	1.4877e-14	19	>200	0
ARHGAP8	NC_006088.4	69904874	69982240	+	13	38	0	1	12	2	36	2.43139e-14	20	>200	0
ITGA9	NC_006089.4	48876018	49109764	-	16	69	0	0	16	10	59	2.4647e-14	21	>200	0
SULF2	NC_006107.4	6107394	6249231	-	15	72	0	0	15	10	62	8.52762e-13	22	>200	0
ASB15	NC_006088.4	22292436	22303894	-	7	8	0	7	0	8	0	2.61602e-12	23	>200	0
C1D	NC_006090.4	11233259	11246857	-	20	173	0	0	20	2	171	1.4603e-11	24	>200	0
WNT11	NC_006088.4	193935318	193969596	+	13	62	0	0	13	3	59	2.58491e-11	25	>200	0
MDFIC	NC_006088.4	25764792	25813425	-	33	499	0	0	33	6	493	3.29452e-11	26	>200	0
ZMYND8	NC_006107.4	5955598	6021210	-	12	54	0	1	11	29	25	7.2498e-11	27	>200	0
NOCT	NC_006091.4	29428771	29434135	+	11	45	0	0	11	0	45	1.47828e-10	28	>200	0
UVRAG	NC_006088.4	194105689	194191269	-	11	46	0	1	10	6	40	1.91368e-10	29	>200	0
RORB	NC_006127.4	36543163	36676401	+	16	124	0	0	16	7	117	2.97745e-10	30	25	4.34872
TFEC	NC_006088.4	25289184	25351175	+	24	310	0	0	24	4	306	6.75228e-10	31	>200	0
C2H7ORF36	NC_006089.4	49973256	49987969	+	17	157	0	0	17	1	156	1.33334e-09	32	>200	0
ETAA1	NC_006090.4	10941018	10950314	+	30	526	0	0	30	6	520	7.76728e-09	33	>200	0
PCSK5	NC_006127.4	37062787	37324242	+	10	50	0	1	9	23	27	8.34206e-09	34	>200	0
POU6F2	NC_006089.4	49639926	49897445	+	18	204	0	0	18	10	194	1.1721e-08	35	3	4.85505
LOC100857299	NC_006127.4	49468851	49470760	-	10	58	0	0	10	0	58	3.75854e-08	36	>200	0
LOC427259	NC_006127.4	37329741	37335981	-	7	22	0	0	7	1	21	4.5526e-08	37	>200	0
MPLKIP	NC_006089.4	50140128	50148713	-	19	249	0	0	19	4	245	4.87677e-08	38	>200	0
CHRDL1	NC_006091.4	13563272	13605339	+	9	61	0	1	8	11	50	7.20433e-07	39	>200	0
PCDH18	NC_006091.4	28880214	28890093	-	14	165	0	0	14	3	162	7.67824e-07	40	>200	0
AMMECR1	NC_006091.4	13672429	13743991	+	9	65	0	0	9	7	58	1.25165e-06	41	>200	0
KIF16B	NC_006090.4	5502445	5637488	-	18	300	0	0	18	14	286	3.52331e-06	42	>200	0
ANXA1	NC_006127.4	36022638	36040372	+	9	75	0	0	9	3	72	4.2418e-06	43	>200	0
SLU7	NC_006100.4	7821550	7832434	+	5	16	0	0	5	2	14	4.58415e-06	44	>200	0
FLRT3	NC_006090.4	4687981	4701438	-	18	309	0	0	18	6	303	5.30062e-06	45	7	3.73181
TPCN2	NC_006092.4	17116917	17139354	+	9	79	0	0	9	2	77	6.55228e-06	46	>200	0
CCDC181	NC_006088.4	83665114	83677332	+	3	4	0	3	0	4	0	1.77485e-05	47	>200	0
LOC100857117	NC_006091.4	28172128	28173788	-	17	307	0	0	17	0	307	1.83396e-05	48	>200	0
CCND1	NC_006092.4	17526264	17539488	+	9	90	0	0	9	1	89	1.91175e-05	49	>200	0
NUDT12	NC_006127.4	49859097	49871890	+	6	35	0.0001	0	6	2	33	2.16727e-05	50	>200	0
INHBA	NC_006089.4	50745139	50762744	-	20	427	0.0001	0	20	9	418	3.92162e-05	51	>200	0
C9ORF72	NC_006127.4	68714993	68730129	-	5	24	0	1	4	7	17	3.99609e-05	52	>200	0
TRPM6	NC_006127.4	36704869	36791788	-	7	62	0	0	7	17	45	7.38039e-05	53	>200	0
CA10	NC_006105.4	5218241	5378305	-	8	87	0.0002	0	8	6	81	0.000100503	54	15	5.07952
TMEM161B	NC_006127.4	60592899	60637640	+	5	29	0.0002	0	5	5	24	0.000104251	55	154	2.47607
SMARCA1	NC_006091.4	14366386	14394833	+	14	256	0.0001	0	14	16	240	0.000110505	56	3	4.39652
PAM	NC_006127.4	50043929	50172820	-	4	16	0	1	3	11	5	0.000115043	57	>200	0
GABRP	NC_006100.4	3486227	3511407	-	4	17	0.0001	1	3	5	12	0.00014847	58	>200	0
SYNPR	NC_006099.4	13436126	13515806	+	6	50	0.0003	0	6	3	47	0.000171817	59	3	6.28121
LOC101752151	NC_006127.4	60458227	60462961	-	4	18	0.0001	0	4	0	18	0.00018839	60	>200	0
ATP10B	NC_006100.4	7700514	7752211	+	6	52	0.0003	1	5	8	44	0.000214036	61	>200	0
MXD3	NC_006100.4	10194903	10196656	+	2	2	0.0004	0	2	0	2	0.000272347	62	>200	0
LOC107051890	NC_006127.4	16675085	16677499	-	2	2	0.0004	2	0	2	0	0.000272347	63	>200	0
BFSP1	NC_006090.4	11489065	11507714	+	4	20	0.0003	0	4	1	19	0.000290532	64	>200	0
IMPG2	NC_006088.4	85204682	85257589	-	3	9	0.0004	0	3	4	5	0.000350285	65	>200	0
KCNMB1	NC_006100.4	3783438	3790487	+	3	9	0.0004	0	3	0	9	0.000350285	66	>200	0
IL17REL	NC_006088.4	20028245	20070797	-	10	161	0.0005	0	10	5	156	0.000377609	67	>200	0
CDK5RAP2	NC_006104.4	5032684	5106426	-	10	161	0.0005	0	10	11	150	0.000377609	68	>200	0
LINGO2	NC_006127.4	68831153	69316946	-	5	38	0.0005	0	5	13	25	0.000389626	69	10	4.64929
ADGRV1	NC_006127.4	59415259	59675689	-	6	60	0.0008	0	6	42	18	0.000470564	70	93	2.72072
TENM1	NC_006091.4	15264602	15591324	+	16	367	0.001	1	15	28	339	0.000487197	71	1	5.78231
SGCG	NC_006088.4	177672798	177788672	-	12	231	0.0006	0	12	4	227	0.000526426	72	>200	0
FERD3L	NC_006089.4	29666630	29667971	-	7	85	0.0007	0	7	3	82	0.00053336	73	>200	0
NXT2	NC_006091.4	13857377	13869512	-	3	11	0.0011	0	3	1	10	0.000671237	74	193	2.3889
FBLN1	NC_006088.4	70545282	70627627	+	5	43	0.0004	0	5	7	36	0.000697981	75	>200	0
ABI3BP	NC_006088.4	84984069	85117219	-	4	25	0.001	0	4	13	12	0.000710321	76	>200	0
FOXP2	NC_006088.4	25907210	26319871	-	12	241	0.0005	0	12	17	224	0.000763349	77	30	3.47779
MBLAC2	NC_006127.4	59716931	59725179	+	2	3	0.001	0	2	0	3	0.000808055	78	16	4.58661
HDHD1	NC_006088.4	126513559	126577878	+	4	26	0.0009	2	2	4	22	0.00082853	79	>200	0
LOC107052568	NC_006089.4	25707500	25710029	-	7	92	0.0007	0	7	0	92	0.000856964	80	>200	0
CBR1	NC_006088.4	106570973	106577332	+	3	12	0.0009	0	3	0	12	0.000883987	81	>200	0
NDUFA4	NC_006089.4	26070094	26073822	-	7	95	0.0013	0	7	0	95	0.00103585	82	110	2.77826
PIM3	NC_006088.4	19164431	19168891	-	11	216	0.0013	0	11	4	212	0.00103784	83	>200	0
LOC100858788	NC_006089.4	121126613	121130416	-	3	13	0.0007	0	3	0	13	0.00113508	84	>200	0
FGF9	NC_006088.4	178382192	178412065	-	11	220	0.0015	0	11	1	219	0.00120274	85	4	4.88078
NDFIP2	NC_006088.4	153022585	153069334	-	9	156	0.0017	0	9	9	147	0.00122778	86	20	3.88398
BNC2	NC_006127.4	32322686	32692066	-	13	291	0.0014	0	13	23	268	0.00126924	87	>200	0
ZSWIM6	NC_006127.4	19094888	19206550	+	5	49	0.0021	0	5	13	36	0.00127437	88	75	2.38954
DGKB	NC_006089.4	27440873	27776364	-	11	225	0.0016	0	11	17	208	0.00143856	89	4	5.2902
LOC101748927	NC_006127.4	32243479	32246158	+	12	260	0.002	0	12	0	260	0.00145987	90	>200	0
SLC7A10	NC_006098.4	10221340	10258620	-	5	51	0.0028	0	5	0	51	0.00152784	91	>200	0
LOC101749017	NC_006113.4	4973531	4985366	-	2	4	0.003	0	2	0	4	0.00159836	92	>200	0
HABP4	NC_006127.4	42179846	42201841	+	2	4	0.003	1	1	1	3	0.00159836	93	11	4.12441
PTCHD2	NC_006108.4	5718515	5812765	-	5	52	0.0018	0	5	14	38	0.0016676	94	>200	0
ISL1	NC_006127.4	15144263	15156962	+	11	230	0.0008	0	11	5	225	0.00171097	95	>200	0
LOC101750303	NC_006127.4	67794692	67801147	-	3	15	0.002	0	3	0	15	0.0017618	96	>200	0
TMEM182	NC_006088.4	134124644	134148901	+	20	578	0.0022	0	20	7	571	0.00184528	97	>200	0
BRINP1	NC_006104.4	4502517	4580970	-	13	304	0.0014	0	13	2	302	0.00186653	98	4	5.89618
PPARA	NC_006088.4	71328993	71369428	+	6	78	0.0014	0	6	6	72	0.00187853	99	>200	0
POU3F3	NC_006088.4	135051171	135054413	+	20	579	0.0017	0	20	1	578	0.00188228	100	6	4.81139
MEOX2	NC_006089.4	28094371	28147050	-	10	200	0.0024	0	10	5	195	0.00197139	101	>200	0
PPM1B	NC_006090.4	25477569	25536128	+	4	33	0.0024	1	3	8	25	0.00206928	102	>200	0
LRRIQ1	NC_006088.4	41739769	41825966	+	3	16	0.0019	1	2	9	7	0.00214182	103	>200	0
KCND2	NC_006088.4	23518399	23787753	-	7	110	0.0028	0	7	7	103	0.00241216	104	1	5.65953
RUNX1	NC_006088.4	106011547	106165218	-	3	17	0.0038	0	3	3	14	0.00256896	105	>200	0
TWISTNB	NC_006089.4	29836829	29840103	-	6	83	0.002	0	6	0	83	0.00257545	106	>200	0
LRP3	NC_006098.4	10194671	10221559	+	2	5	0.0028	0	2	1	4	0.00263472	107	5	4.79258
GUCA2B	NC_006108.4	5834824	5839720	+	2	5	0.0028	0	2	0	5	0.00263472	108	>200	0
PKN2	NC_006095.4	15217321	15269443	-	15	403	0.0039	0	15	14	389	0.00331773	109	>200	0
PRIM2	NC_006090.4	86965138	87048991	-	5	61	0.0045	0	5	0	61	0.00337958	110	>200	0
GAS2	NC_006092.4	2923400	3016229	+	3	19	0.0038	0	3	7	12	0.00357187	111	>200	0
MLLT3	NC_006127.4	34027175	34141802	-	3	19	0.0038	0	3	9	10	0.00357187	112	>200	0
PCSK2	NC_006090.4	11509238	11606574	-	4	39	0.0042	0	4	7	32	0.00384646	113	>200	0
DNAH7	NC_006094.4	9682846	9797359	-	2	6	0.005	1	1	4	2	0.0039088	114	>200	0
TMEM201	NC_006108.4	3417548	3442977	+	2	6	0.005	0	2	2	4	0.0039088	115	108	2.74453
KHDRBS3	NC_006089.4	143191892	143272288	+	9	186	0.0047	1	8	7	179	0.00402262	116	2	5.24987
GPR85	NC_006088.4	26676407	26682294	+	7	121	0.0035	0	7	6	115	0.00409832	117	5	5.17004
FANCF	NC_006092.4	2902160	2904877	-	3	20	0.0043	0	3	0	20	0.00415094	118	>200	0
SHOX	NC_006088.4	129773258	129781085	-	13	335	0.005	0	13	1	334	0.00425856	119	>200	0
CADPS	NC_006099.4	13178446	13352400	-	8	154	0.0049	0	8	23	131	0.0042748	120	6	5.22342
SLIT2	NC_006091.4	75487239	75767455	-	10	224	0.0042	0	10	22	202	0.00442109	121	>200	0
KHDRBS2	NC_006090.4	86406227	86748750	+	6	93	0.0048	0	6	6	87	0.00452877	122	9	4.11799
DSCR3	NC_006088.4	107062244	107080274	-	2	7	0.005	0	2	0	7	0.00541247	123	>200	0
USP49	NC_006113.4	4986408	5019177	-	2	7	0.005	0	2	3	4	0.00541247	124	>200	0
KIF24	NC_006127.4	7583169	7613583	-	2	7	0.005	2	0	6	1	0.00541247	125	>200	0
NMRK1	NC_006127.4	36835026	36844898	-	2	7	0.005	0	2	1	6	0.00541247	126	>200	0
KIF2A	NC_006127.4	19421116	19478368	+	4	43	0.0045	0	4	15	28	0.00547897	127	9	3.88053
TMTC2	NC_006088.4	40829198	41088658	+	7	128	0.0054	0	7	11	117	0.00556022	128	90	2.3759
OTOR	NC_006090.4	5669202	5674198	+	5	69	0.0058	0	5	2	67	0.00573186	129	>200	0
SLC6A15	NC_006088.4	41628233	41664415	-	6	98	0.006	0	6	11	87	0.00583697	130	3	5.30704
NDST4	NC_006091.4	56456769	56569952	+	4	44	0.0058	0	4	1	43	0.00594918	131	8	4.54283
WNT7B	NC_006088.4	70844240	70935921	-	8	165	0.0071	0	8	3	162	0.00642623	132	46	3.16778
ADGRL4	NC_006095.4	18585545	18660941	+	19	604	0.007	0	19	11	593	0.00644491	133	>200	0
LOC101748752	NC_006127.4	15936854	16047463	-	4	45	0.0079	0	4	1	44	0.00644548	134	>200	0
SRFBP1	NC_006127.4	80915476	80971421	+	5	71	0.0067	0	5	1	70	0.00646424	135	>200	0
GPR65	NC_006092.4	42937157	42951756	+	6	102	0.0073	0	6	3	99	0.00706651	136	>200	0
GAS1	NC_006127.4	41060381	41065630	-	6	102	0.0073	0	6	5	97	0.00706651	137	>200	0
HMGA2	NC_006088.4	34203096	34308540	+	8	168	0.007	0	8	5	163	0.00713475	138	>200	0
EIF1B	NC_006089.4	44128616	44135836	-	2	8	0.0062	0	2	1	7	0.00713782	139	19	3.55181
MSRB3	NC_006088.4	33986641	34070695	+	6	103	0.0083	0	6	9	94	0.00740104	140	>200	0
FLRT2	NC_006092.4	42172881	42235676	+	10	242	0.0077	2	8	10	232	0.00748515	141	17	3.06971
ARHGEF7	NC_006088.4	139308292	139416316	+	8	170	0.007	0	8	22	148	0.00763878	142	2	4.70473
PRKRIR	NC_006088.4	193795797	193809201	+	3	25	0.0101	0	3	6	19	0.00787741	143	>200	0
RNF217	NC_006090.4	60313595	60376646	-	7	137	0.009	0	7	5	132	0.00797394	144	>200	0
CEBPA	NC_006098.4	10433513	10434487	-	4	48	0.0089	0	4	0	48	0.00809677	145	>200	0
PIK3R1	NC_006127.4	21600556	21660369	+	6	105	0.0079	0	6	18	87	0.00810413	146	167	1.63897
SOX1	NC_006088.4	139815684	139817990	+	9	209	0.0106	0	9	3	206	0.0084304	147	8	4.44008
ZFAND3	NC_006090.4	29750388	29880669	-	6	106	0.0104	0	6	5	101	0.00847309	148	>200	0
FABP2	NC_006091.4	55073379	55075824	+	3	26	0.0102	0	3	0	26	0.00879683	149	>200	0
SLC24A2	NC_006127.4	33788860	33891969	-	3	26	0.0102	0	3	10	16	0.00879683	150	11	4.97109
LOC101748821	NC_006088.4	106796013	106799338	-	2	9	0.0089	0	2	0	9	0.00907711	151	>200	0
HLCS	NC_006088.4	106860708	106977006	-	2	9	0.0089	0	2	0	9	0.00907711	152	>200	0
MANEAL	NC_006110.4	3574382	3577791	-	2	9	0.0089	0	2	2	7	0.00907711	153	5	5.20551
LYSMD3	NC_006127.4	59688140	59692119	+	2	9	0.0089	0	2	1	8	0.00907711	154	>200	0
DTHD1	NC_006091.4	70625209	70638449	-	4	50	0.0101	0	4	4	46	0.00933854	155	>200	0
AGA	NC_006091.4	42504432	42516362	+	9	213	0.0106	0	9	1	212	0.00947217	156	>200	0
VEGFA	NC_006090.4	30739147	30759022	-	7	142	0.0106	0	7	6	136	0.00960892	157	>200	0
STMN2	NC_006089.4	121234803	121268183	+	3	27	0.0102	0	3	5	22	0.00977644	158	3	5.18118
SYT1	NC_006088.4	39108395	39454261	+	11	292	0.0103	0	11	12	280	0.0100199	159	2	5.91521
LPHN2	NC_006095.4	17456472	17605244	-	18	588	0.0117	0	18	23	565	0.0101724	160	>200	0
ETV1	NC_006089.4	27321167	27392291	-	11	293	0.0113	0	11	15	278	0.0102599	161	40	3.29979
PPP2R3B	NC_006088.4	129990382	130041209	+	7	144	0.0118	0	7	11	133	0.0103269	162	>200	0
NDST3	NC_006091.4	55377747	55489121	-	4	52	0.0097	0	4	13	39	0.0106979	163	3	5.4356
LOC107051891	NC_006127.4	17514464	17517490	-	3	28	0.0141	0	3	0	28	0.010817	164	>200	0
LOC101747537	NC_006091.4	71002392	71011893	+	7	146	0.0105	0	7	0	146	0.0110832	165	>200	0
CPB1	NC_006096.4	12454659	12470945	+	2	10	0.0117	0	2	0	10	0.0112228	166	>200	0
PRDM10	NC_006111.4	1498730	1538069	+	2	10	0.0117	1	1	7	3	0.0112228	167	>200	0
KIF2B	NC_006105.4	5695737	5697866	+	5	83	0.0129	0	5	0	83	0.0122744	168	>200	0
PCDH17	NC_006088.4	163442841	163529605	-	12	344	0.0135	0	12	22	322	0.01295	169	9	3.96164
NAV3	NC_006088.4	38395636	38924294	+	9	226	0.013	0	9	39	187	0.0135349	170	1	5.59235
GTF2I	NC_006106.4	2633273	2687618	-	2	11	0.0177	2	0	3	8	0.0135676	171	>200	0
PIK3CD	NC_006108.4	3443523	3490258	+	2	11	0.0177	0	2	3	8	0.0135676	172	>200	0
NEK10	NC_006089.4	38501592	38575922	-	4	56	0.0151	3	1	8	48	0.0137847	173	>200	0
SPRY2	NC_006088.4	152670005	152675345	+	9	227	0.0147	0	9	2	225	0.0138936	174	82	2.81352
TARDBP	NC_006108.4	4061830	4067665	+	5	87	0.0156	0	5	8	79	0.0148089	175	>200	0
LOC101748831	NC_006088.4	192448590	192602478	+	10	270	0.0128	0	10	21	249	0.015217	176	>200	0
PRDM6	NC_006127.4	81385236	81455560	+	4	58	0.0171	0	4	4	54	0.0155188	177	>200	0
CEP120	NC_006127.4	81489529	81527276	-	4	58	0.0171	0	4	12	46	0.0155188	178	>200	0
C5ORF49	NC_006089.4	79481999	79497576	-	2	12	0.0161	0	2	0	12	0.0161044	179	>200	0
CYP26B1	NC_006091.4	90722435	90742749	+	2	12	0.0161	0	2	0	12	0.0161044	180	173	2.49883
DYSF	NC_006091.4	91211949	91279004	-	2	12	0.0161	0	2	0	12	0.0161044	181	>200	0
FZD9	NC_006106.4	264594	266693	-	2	12	0.0161	0	2	2	10	0.0161044	182	>200	0
SMIM15	NC_006127.4	19017599	19020604	-	2	12	0.0161	0	2	1	11	0.0161044	183	>200	0
LOC769884	NC_006127.4	66916860	66919112	+	2	12	0.0161	0	2	0	12	0.0161044	184	>200	0
PREPL	NC_006090.4	25546282	25574751	-	7	158	0.0172	0	7	3	155	0.0164833	185	10	5.02517
SHANK3	NC_006088.4	141463	398198	+	1	1	0.0164	1	0	1	0	0.0165052	186	9	4.68001
COPG2	NC_006088.4	984120	1003140	-	1	1	0.0164	1	0	1	0	0.0165052	187	49	2.75538
TUBAL3	NC_006088.4	1198475	1204985	+	1	1	0.0164	1	0	1	0	0.0165052	188	>200	0
LOC101748386	NC_006088.4	105878845	105890465	-	1	1	0.0164	0	1	0	1	0.0165052	189	>200	0
CEP126	NC_006088.4	182811920	182848619	-	1	1	0.0164	0	1	0	1	0.0165052	190	131	2.41915
TMIE	NC_006089.4	3305818	3336865	+	1	1	0.0164	0	1	0	1	0.0165052	191	35	4.70985
MYL3	NC_006089.4	3458909	3493527	-	1	1	0.0164	0	1	0	1	0.0165052	192	>200	0
FRMPD3	NC_006091.4	1924739	1982052	+	1	1	0.0164	0	1	0	1	0.0165052	193	36	3.17224
RPL7L1	NC_006091.4	54895202	54898868	-	1	1	0.0164	0	1	0	1	0.0165052	194	>200	0
SPATA18	NC_006091.4	66567846	66587444	-	1	1	0.0164	1	0	1	0	0.0165052	195	>200	0
ACYP1	NC_006092.4	38195151	38196110	-	1	1	0.0164	0	1	0	1	0.0165052	196	>200	0
CLK1	NC_006094.4	11350687	11358405	-	1	1	0.0164	1	0	1	0	0.0165052	197	>200	0
NUF2	NC_006095.4	5470055	5481515	-	1	1	0.0164	1	0	1	0	0.0165052	198	>200	0
RGS8	NC_006095.4	5592462	5611218	+	1	1	0.0164	1	0	1	0	0.0165052	199	14	5.3644
RNF2	NC_006095.4	8057436	8073773	+	1	1	0.0164	0	1	0	1	0.0165052	200	>200	0
DEPDC1	NC_006095.4	28881059	28891443	-	1	1	0.0164	0	1	0	1	0.0165052	201	>200	0
SRSF11	NC_006095.4	29105353	29123531	+	1	1	0.0164	0	1	0	1	0.0165052	202	>200	0
KIF23	NC_006097.4	19360358	19378167	+	1	1	0.0164	0	1	0	1	0.0165052	203	>200	0
LOC770260	NC_006101.4	13887558	13907235	-	1	1	0.0164	1	0	1	0	0.0165052	204	>200	0
ADAP2	NC_006105.4	6713432	6721058	+	1	1	0.0164	1	0	1	0	0.0165052	205	>200	0
SH2D5	NC_006108.4	6764989	6771284	+	1	1	0.0164	0	1	0	1	0.0165052	206	9	5.46678
PROM2	NC_006109.4	453596	460794	-	1	1	0.0164	0	1	0	1	0.0165052	207	>200	0
MOV10	NC_006113.4	3544639	3550623	+	1	1	0.0164	0	1	0	1	0.0165052	208	>200	0
LOC101751186	NC_006127.4	141224	153820	+	1	1	0.0164	0	1	0	1	0.0165052	209	>200	0
CDC20B	NC_006127.4	16680350	16693157	-	1	1	0.0164	1	0	1	0	0.0165052	210	>200	0
LOC427292	NC_006127.4	53441082	53466838	-	1	1	0.0164	1	0	1	0	0.0165052	211	>200	0
POLR3G	NC_006127.4	59695004	59716898	-	1	1	0.0164	1	0	1	0	0.0165052	212	>200	0
LOC100857921	NC_006127.4	71036316	71044271	-	1	1	0.0164	0	1	0	1	0.0165052	213	>200	0
PDE10A	NC_006090.4	43199523	43470730	+	10	274	0.0177	0	10	20	254	0.0166815	214	18	4.76468
C1H7ORF60	NC_006088.4	26768477	26802395	+	3	33	0.0161	0	3	6	27	0.0169528	215	>200	0
TMEM200A	NC_006090.4	57937889	57996240	-	3	33	0.0161	0	3	6	27	0.0169528	216	1	5.63248
LOC101747799	NC_006088.4	46516656	46518848	+	10	275	0.0208	0	10	0	275	0.0170633	217	>200	0
PTPRJ	NC_006095.4	17548921	17583607	+	13	401	0.0166	0	13	5	396	0.0172864	218	>200	0
AGMO	NC_006089.4	27888734	28076267	-	6	124	0.016	0	6	4	120	0.0173341	219	>200	0
POT1	NC_006088.4	21741937	21804751	+	5	91	0.0167	0	5	3	88	0.0176714	220	>200	0
SIX3	NC_006090.4	25897357	25901196	+	8	198	0.0188	0	8	4	194	0.0178241	221	4	4.34381
C1GALT1C1	NC_006091.4	16447434	16449131	+	4	61	0.0211	0	4	0	61	0.0183671	222	>200	0
ELAVL2	NC_006127.4	67419195	67504218	-	3	34	0.0183	0	3	8	26	0.0183694	223	2	5.15482
TRAPPC12	NC_006090.4	94019728	94067086	+	5	92	0.0199	0	5	11	81	0.0184401	224	65	2.63844
C2H8ORF37	NC_006089.4	127041614	127052014	-	6	126	0.0213	0	6	0	126	0.0186041	225	>200	0
ATRNL1	NC_006093.4	28168903	28589072	+	8	200	0.0212	1	7	19	181	0.0188068	226	18	3.64646
DYRK1A	NC_006088.4	107161479	107182204	+	2	13	0.0199	0	2	3	10	0.018826	227	>200	0
TRDN	NC_006090.4	60991949	61132154	+	7	163	0.0198	0	7	5	158	0.0192046	228	>200	0
FAM133B	NC_006089.4	22712260	22728647	-	4	62	0.0197	0	4	8	54	0.0193836	229	>200	0
SLC7A13	NC_006089.4	123199214	123205624	-	4	62	0.0197	0	4	3	59	0.0193836	230	>200	0
ABCC6	NC_006101.4	7730802	7756484	-	3	35	0.0219	0	3	4	31	0.0198497	231	>200	0
ZNF608	NC_006127.4	79623730	79721327	+	10	284	0.0246	0	10	21	263	0.0207958	232	31	2.78245
LMO4	NC_006095.4	15787883	15801555	-	15	501	0.0232	0	15	3	498	0.0211888	233	2	5.34499
CCDC59	NC_006088.4	40702580	40708889	-	3	36	0.0212	0	3	0	36	0.0213938	234	>200	0
LOC107053632	NC_006093.4	7172803	7174280	-	3	36	0.0212	0	3	0	36	0.0213938	235	>200	0
SH3GL3	NC_006097.4	11407257	11450991	+	3	36	0.0212	0	3	6	30	0.0213938	236	>200	0
FBXO6	NC_006108.4	5659995	5667607	-	3	36	0.0212	0	3	0	36	0.0213938	237	>200	0
DDX10	NC_006088.4	180017799	180182057	-	4	64	0.0236	0	4	6	58	0.0215193	238	>200	0
ITGA1	NC_006127.4	15771740	15844439	+	7	167	0.0242	0	7	12	155	0.0215965	239	>200	0
YIPF7	NC_006091.4	68062286	68075787	+	2	14	0.0229	0	2	2	12	0.0217259	240	>200	0
SVIP	NC_006092.4	3016779	3020197	-	2	14	0.0229	0	2	0	14	0.0217259	241	82	2.75865
TMEFF2	NC_006094.4	8226217	8335805	-	8	206	0.0228	0	8	7	199	0.0219861	242	30	4.14749
FIGN	NC_006094.4	20583699	20684258	+	8	207	0.0256	0	8	19	188	0.0225506	243	>200	0
MYT1L	NC_006090.4	93376945	93675483	-	7	170	0.0205	1	6	22	148	0.0235205	244	1	5.66976
LOC101750537	NC_006091.4	16120568	16121828	-	6	133	0.0235	0	6	0	133	0.0235459	245	>200	0
TBX18	NC_006090.4	77511454	77533879	+	8	209	0.0263	0	8	5	204	0.0237102	246	>200	0
DTWD2	NC_006127.4	71760525	71835352	+	4	66	0.0232	0	4	3	63	0.0237932	247	>200	0
EFNA5	NC_006127.4	48046710	48253798	+	7	171	0.0279	0	7	10	161	0.0241872	248	132	2.44975
LOC423653	NC_006093.4	7765615	7786126	-	3	38	0.027	0	3	1	37	0.0246737	249	>200	0
GFRA1	NC_006093.4	28641077	28776861	-	7	172	0.0239	0	7	7	165	0.0248667	250	>200	0
GDF6	NC_006089.4	127337457	127346381	-	6	135	0.0243	0	6	0	135	0.0251047	251	>200	0
PREX1	NC_006107.4	6379598	6530055	-	4	68	0.0311	0	4	26	42	0.0262073	252	>200	0
ANGPT1	NC_006089.4	131784819	131949415	-	5	101	0.0282	0	5	6	95	0.0263591	253	>200	0
LOC101750488	NC_006088.4	44585149	44588135	+	3	39	0.0277	0	3	0	39	0.0264093	254	>200	0
DRGX	NC_006093.4	18690666	18707361	-	3	39	0.0277	0	3	1	38	0.0264093	255	>200	0
PLK2	NC_006127.4	18019481	18025474	-	3	39	0.0277	0	3	10	29	0.0264093	256	28	3.02189
NPAS3	NC_006092.4	35105386	35715453	+	15	516	0.0267	0	15	13	503	0.0265778	257	4	4.98736
C5H15ORF41	NC_006092.4	31454000	31569431	-	13	426	0.0292	0	13	9	417	0.0265996	258	>200	0
LOC107055200	NC_006088.4	101676474	101678784	+	4	69	0.0269	0	4	0	69	0.0274673	259	>200	0
LOC107051640	NC_006088.4	163980536	163981752	+	4	69	0.0269	0	4	0	69	0.0274673	260	>200	0
LOC420486	NC_006089.4	15845216	15859067	-	2	16	0.0314	0	2	5	11	0.0280338	261	>200	0
LSM6	NC_006091.4	31621784	31626786	+	2	16	0.0314	0	2	1	15	0.0280338	262	>200	0
DLX2	NC_006094.4	17917530	17918751	+	2	16	0.0314	0	2	0	16	0.0280338	263	47	3.50399
CPNE8	NC_006088.4	15507104	15601794	+	3	40	0.0299	0	3	5	35	0.0282085	264	22	3.58329
TES	NC_006088.4	25175209	25201316	-	3	40	0.0299	0	3	5	35	0.0282085	265	>200	0
UTP18	NC_006105.4	5161489	5169684	+	3	40	0.0299	0	3	3	37	0.0282085	266	>200	0
GRM8	NC_006088.4	20922609	21247223	+	5	103	0.0317	0	5	13	90	0.0283715	267	3	5.30287
ARL6	NC_006088.4	91211031	91229743	+	3	41	0.0309	0	3	2	39	0.0300712	268	47	3.11903
MRPL39	NC_006088.4	102492039	102501323	-	3	41	0.0309	0	3	1	40	0.0300712	269	>200	0
STK3	NC_006089.4	128247245	128376565	-	3	41	0.0309	0	3	7	34	0.0300712	270	>200	0
PDE11A	NC_006094.4	15614915	15742636	+	3	41	0.0309	1	2	16	25	0.0300712	271	93	2.90079
TSPAN12	NC_006088.4	23467478	23513137	+	4	71	0.0326	0	4	8	63	0.0300941	272	>200	0
LOC100858183	NC_006088.4	43644308	43649334	-	4	71	0.0326	0	4	0	71	0.0300941	273	>200	0
GDNF	NC_006127.4	11724470	11745751	-	4	71	0.0326	0	4	8	63	0.0300941	274	>200	0
MMP16	NC_006089.4	124196143	124391614	-	5	105	0.031	0	5	19	86	0.0304786	275	3	4.9472
TWIST1	NC_006089.4	29649392	29651300	-	7	180	0.0341	0	7	2	178	0.0307776	276	>200	0
TRPS1	NC_006089.4	134920969	135127454	-	13	436	0.0336	1	12	17	419	0.0312034	277	>200	0
LOC417691	NC_006088.4	15448324	15488300	+	2	17	0.0333	0	2	2	15	0.0314291	278	>200	0
OBSCN	NC_006089.4	2109546	2297520	-	2	17	0.0333	2	0	17	0	0.0314291	279	>200	0
CCK	NC_006089.4	43988975	43993653	-	2	17	0.0333	0	2	2	15	0.0314291	280	12	4.98496
PPP4R4	NC_006092.4	45522149	45584646	+	2	17	0.0333	1	1	14	3	0.0314291	281	3	4.73932
SLC35F5	NC_006094.4	29801036	29832417	+	2	17	0.0333	0	2	11	6	0.0314291	282	>200	0
ZFPM2	NC_006089.4	130901230	131210109	+	10	305	0.0311	0	10	6	299	0.0317583	283	2	4.80581
KLHL4	NC_006091.4	8117801	8151623	-	9	263	0.0319	0	9	0	263	0.0320138	284	>200	0
LOC100859258	NC_006091.4	76243278	76245220	+	6	143	0.0337	0	6	0	143	0.0320217	285	>200	0
C3AR1	NC_006088.4	66846852	66850146	+	1	2	0.0322	0	1	0	2	0.032738	286	>200	0
LOC427933	NC_006088.4	66881395	66887919	+	1	2	0.0322	0	1	1	1	0.032738	287	>200	0
BORCS5	NC_006088.4	71899133	71960634	+	1	2	0.0322	0	1	0	2	0.032738	288	>200	0
RCAN1	NC_006088.4	105909217	105950029	-	1	2	0.0322	0	1	1	1	0.032738	289	>200	0
B3GALT5	NC_006088.4	108068315	108084022	+	1	2	0.0322	0	1	0	2	0.032738	290	82	3.46035
LOC107052387	NC_006088.4	183000113	183001169	-	1	2	0.0322	0	1	0	2	0.032738	291	>200	0
TPMT	NC_006089.4	60573625	60582687	+	1	2	0.0322	0	1	0	2	0.032738	292	>200	0
FAM228	NC_006090.4	104685946	104694113	+	1	2	0.0322	1	0	2	0	0.032738	293	>200	0
HPGDS	NC_006091.4	37449940	37475275	-	1	2	0.0322	0	1	0	2	0.032738	294	>200	0
BBOX1	NC_006092.4	3484719	3519734	+	1	2	0.0322	0	1	1	1	0.032738	295	>200	0
ACTBL2	NC_006092.4	18301980	18319962	-	1	2	0.0322	1	0	1	1	0.032738	296	>200	0
LOC101748344	NC_006092.4	56787155	56840775	+	1	2	0.0322	0	1	0	2	0.032738	297	>200	0
TLE3	NC_006097.4	19499967	19520754	-	1	2	0.0322	0	1	1	1	0.032738	298	>200	0
FUK	NC_006098.4	1825655	1833130	-	1	2	0.0322	0	1	0	2	0.032738	299	>200	0
RSL1D1	NC_006101.4	106784	112198	-	1	2	0.0322	0	1	1	1	0.032738	300	>200	0
PDPN	NC_006108.4	5186808	5202863	-	1	2	0.0322	0	1	0	2	0.032738	301	>200	0
C1ORF158	NC_006108.4	5253737	5257097	-	1	2	0.0322	0	1	0	2	0.032738	302	>200	0
LRRN2	NC_006113.4	1830810	1850482	-	1	2	0.0322	0	1	0	2	0.032738	303	3	5.78175
SLC45A3	NC_006113.4	2215002	2253055	-	1	2	0.0322	0	1	0	2	0.032738	304	>200	0
LOC425470	NC_006114.4	2446046	2450269	+	1	2	0.0322	0	1	0	2	0.032738	305	>200	0
CAPSL	NC_006127.4	10904842	10925919	-	1	2	0.0322	1	0	1	1	0.032738	306	>200	0
ZC3H12C	NC_006088.4	179676852	179717200	-	4	73	0.0333	0	4	11	62	0.0328642	307	>200	0
ZCCHC6	NC_006127.4	40830407	40863419	-	4	73	0.0333	0	4	7	66	0.0328642	308	>200	0
PRKACB	NC_006095.4	16708780	16776230	-	11	352	0.0364	0	11	13	339	0.0338818	309	9	4.62308
LOC107053200	NC_006091.4	24225013	24227181	-	3	43	0.034	0	3	1	42	0.033986	310	>200	0
REPS1	NC_006090.4	54276193	54342447	+	2	18	0.0334	2	0	15	3	0.0349771	311	>200	0
CD28	NC_006094.4	13495614	13507829	-	2	18	0.0334	0	2	0	18	0.0349771	312	>200	0
LOC101750125	NC_006090.4	30485465	30513553	+	5	109	0.0366	0	5	0	109	0.0349809	313	>200	0
RAPGEF4	NC_006094.4	17506096	17627475	-	4	75	0.0371	1	3	23	52	0.0357782	314	12	4.72445
DCP1B	NC_006088.4	61175176	61216706	-	3	44	0.0353	1	2	3	41	0.0360374	315	>200	0
PDE5A	NC_006091.4	54931896	55064894	+	3	44	0.0353	0	3	18	26	0.0360374	316	>200	0
C11ORF49	NC_006092.4	23204920	23293855	-	3	44	0.0353	1	2	6	38	0.0360374	317	34	3.07316
LOC424155	NC_006094.4	18158348	18254462	+	3	45	0.0387	0	3	16	29	0.0381512	318	>200	0
CXADR	NC_006088.4	99316802	99348340	+	7	189	0.0397	0	7	7	182	0.0384763	319	14	3.74745
C12ORF75	NC_006088.4	54221852	54246249	-	5	112	0.0367	0	5	2	110	0.0386132	320	>200	0
BAZ1B	NC_006106.4	212575	261606	+	2	19	0.0421	0	2	13	6	0.0386718	321	>200	0
NARS2	NC_006088.4	192670661	192723417	+	4	77	0.0405	0	4	3	74	0.0388367	322	>200	0
AMPH	NC_006089.4	49313930	49418881	-	3	46	0.0437	0	3	11	35	0.0403267	323	6	5.24714
MOCS2	NC_006127.4	15932120	15940257	-	3	46	0.0437	0	3	3	43	0.0403267	324	>200	0
CDK6	NC_006089.4	22731395	22863502	-	4	78	0.0379	0	4	10	68	0.0404202	325	>200	0
PARP8	NC_006127.4	14799489	14911362	+	4	78	0.0379	0	4	9	69	0.0404202	326	>200	0
NUAK1	NC_006088.4	53983321	54030434	+	5	115	0.0442	0	5	4	111	0.042467	327	6	3.48484
IPMK	NC_006093.4	5253520	5288275	+	2	20	0.0446	0	2	3	17	0.0425075	328	>200	0
PCDH15	NC_006093.4	6078476	6630473	+	2	20	0.0446	0	2	0	20	0.0425075	329	39	3.91009
PMP22	NC_006105.4	2352300	2365897	+	2	20	0.0446	0	2	0	20	0.0425075	330	>200	0
CMSS1	NC_006088.4	84593270	84656654	-	3	47	0.0441	0	3	2	45	0.0425636	331	>200	0
EPB41L2	NC_006090.4	57683852	57788385	+	3	47	0.0441	0	3	14	33	0.0425636	332	>200	0
LOC107052719	NC_006088.4	32603302	32606376	+	3	48	0.0464	0	3	0	48	0.0448614	333	>200	0
KCTD8	NC_006091.4	68114544	68199838	+	3	48	0.0464	0	3	2	46	0.0448614	334	25	3.94425
C3H2ORF43	NC_006090.4	102386988	102495414	-	5	117	0.0446	0	5	6	111	0.0451601	335	>200	0
ATP2B1	NC_006088.4	43397796	43455131	-	4	81	0.0503	0	4	18	63	0.0453877	336	3	5.32455
ARID5B	NC_006093.4	8294733	8438645	-	7	197	0.0486	1	6	21	176	0.0462945	337	>200	0
ZIC4	NC_006096.4	11914803	11933671	-	7	197	0.0486	0	7	11	186	0.0462945	338	19	3.98821
WNT16	NC_006088.4	23245771	23256298	-	2	21	0.0505	0	2	0	21	0.0464784	339	>200	0
C1H3ORF38	NC_006088.4	88820532	88827793	+	2	21	0.0505	0	2	0	21	0.0464784	340	>200	0
PAPD7	NC_006089.4	79949385	80005087	-	2	21	0.0505	2	0	17	4	0.0464784	341	>200	0
SLC39A10	NC_006094.4	9595563	9682845	+	6	157	0.0524	0	6	5	152	0.0468789	342	7	4.66735
DMRT2	NC_006127.4	26043361	26049613	+	4	82	0.0462	0	4	3	79	0.0471158	343	>200	0
ARMC3	NC_006089.4	17451965	17522202	-	3	49	0.0495	0	3	6	43	0.0472195	344	>200	0
C1H11ORF73	NC_006088.4	190562765	190571669	-	5	119	0.051	0	5	3	116	0.0479529	345	>200	0
LOC107054001	NC_006088.4	69879565	69883102	+	1	3	0.0454	0	1	0	3	0.048703	346	>200	0
NOBOX	NC_006088.4	74522017	74541714	-	1	3	0.0454	0	1	0	3	0.048703	347	>200	0
TPTE2	NC_006088.4	170490356	170509428	+	1	3	0.0454	0	1	1	2	0.048703	348	>200	0
NOL7	NC_006089.4	60720088	60723535	+	1	3	0.0454	0	1	0	3	0.048703	349	>200	0
MC5R	NC_006089.4	96773505	96782158	-	1	3	0.0454	0	1	2	1	0.048703	350	>200	0
C8ORF88	NC_006089.4	125261733	125269199	-	1	3	0.0454	0	1	1	2	0.048703	351	>200	0
NSMCE2	NC_006089.4	138835628	138962102	+	1	3	0.0454	1	0	3	0	0.048703	352	>200	0
PLEKHS1	NC_006093.4	27541745	27569565	+	1	3	0.0454	0	1	0	3	0.048703	353	>200	0
COL6A2	NC_006094.4	6764344	6790429	+	1	3	0.0454	0	1	1	2	0.048703	354	>200	0
AP1S3	NC_006096.4	8269421	8290943	-	1	3	0.0454	0	1	2	1	0.048703	355	46	3.28134
SUSD3	NC_006099.4	6660543	6685099	-	1	3	0.0454	0	1	1	2	0.048703	356	>200	0
DOK3	NC_006100.4	10172729	10175305	-	1	3	0.0454	0	1	0	3	0.048703	357	>200	0
NTAN1	NC_006101.4	74651	82689	-	1	3	0.0454	0	1	2	1	0.048703	358	>200	0
IFI27L2	NC_006110.4	4354527	4358730	+	1	3	0.0454	0	1	0	3	0.048703	359	>200	0
LOC107057525	NC_006088.4	117491598	117498921	-	4	83	0.0485	0	4	0	83	0.0488799	360	>200	0
MBIP	NC_006092.4	36563357	36576650	-	5	120	0.0528	0	5	3	117	0.0493867	361	>200	0
EGLN3	NC_006092.4	35739226	35767213	-	12	421	0.0511	0	12	1	420	0.0494236	362	>200	0
ANKRD26	NC_006088.4	24294540	24342686	+	3	50	0.0549	0	3	4	46	0.0496375	363	>200	0
LOC769421	NC_006105.4	2599575	2624042	-	3	50	0.0549	0	3	1	49	0.0496375	364	>200	0
RALYL	NC_006089.4	122750127	123128753	+	6	160	0.0502	0	6	10	150	0.0505347	365	3	5.55666
ZFAT	NC_006089.4	142654214	142739830	-	6	160	0.0502	0	6	11	149	0.0505347	366	>200	0
LOC101750509	NC_006088.4	126203019	126211833	-	2	22	0.0502	0	2	0	22	0.0505791	367	>200	0
ATF2	NC_006094.4	16722645	16766908	+	2	22	0.0502	0	2	8	14	0.0505791	368	7	4.21429
ITGA6	NC_006094.4	17797914	17838399	-	2	22	0.0502	0	2	9	13	0.0505791	369	>200	0
UROC1	NC_006099.4	10692553	10754925	-	2	22	0.0502	0	2	4	18	0.0505791	370	>200	0
EPHA10	NC_006110.4	3601727	3635643	+	2	22	0.0502	0	2	0	22	0.0505791	371	2	5.4376
HMGCLL1	NC_006090.4	87805618	87878838	+	4	84	0.0484	0	4	4	80	0.05068	372	4	4.639
KCNS2	NC_006089.4	128232175	128244483	+	3	51	0.0574	0	3	7	44	0.0521146	373	3	5.99897
SLC30A5	NC_006127.4	21885833	21906293	+	3	51	0.0574	0	3	6	45	0.0521146	374	>200	0
ATXN10	NC_006088.4	70660392	70756368	+	5	122	0.0534	0	5	4	118	0.0523293	375	21	3.64351
ZHX2	NC_006089.4	137930168	137997330	+	4	85	0.0529	0	4	2	83	0.0525159	376	>200	0
HS6ST1	NC_006096.4	1549897	1715952	-	4	85	0.0529	0	4	0	85	0.0525159	377	121	2.95131
SOX6	NC_006092.4	11108996	11253711	-	10	335	0.0585	2	8	18	317	0.0536472	378	34	3.00654
FBN1	NC_006097.4	10167182	10313544	-	5	123	0.0533	1	4	34	89	0.0538381	379	>200	0
GRB14	NC_006094.4	20231657	20300305	+	7	204	0.0565	0	7	8	196	0.053912	380	>200	0
EPHA6	NC_006088.4	90714721	91209121	+	4	86	0.0569	0	4	11	75	0.0543877	381	4	5.74084
PACRGL	NC_006091.4	75452775	75468148	-	4	86	0.0569	0	4	1	85	0.0543877	382	>200	0
LOC107052718	NC_006088.4	32606383	32609430	+	3	52	0.0533	0	3	0	52	0.0546503	383	>200	0
NPR3	NC_006127.4	10035521	10086735	-	3	52	0.0533	1	2	12	40	0.0546503	384	>200	0
PKP2	NC_006088.4	58878183	58921009	+	2	23	0.0561	0	2	3	20	0.0548042	385	>200	0
HOXA7	NC_006089.4	32674588	32694939	-	2	23	0.0561	2	0	16	7	0.0548042	386	>200	0
CDK15	NC_006094.4	11635582	11670522	+	2	23	0.0561	1	1	2	21	0.0548042	387	>200	0
OSTN	NC_006096.4	13760518	13772571	-	2	23	0.0561	0	2	1	22	0.0548042	388	>200	0
MTMR14	NC_006099.4	11450538	11480440	+	2	23	0.0561	0	2	8	15	0.0548042	389	>200	0
TBL1X	NC_006088.4	125174591	125374965	-	5	124	0.0549	0	5	12	112	0.0553718	390	>200	0
LOC107052258	NC_006127.4	28083066	28094318	-	5	124	0.0549	0	5	0	124	0.0553718	391	>200	0
ISPD	NC_006089.4	28332499	28444561	-	6	164	0.062	0	6	5	159	0.0556732	392	69	2.89644
MAMLD1	NC_006091.4	17863213	17942344	-	6	165	0.0639	0	6	6	159	0.0570052	393	4	4.70939
DRD3	NC_006088.4	82976704	82989800	+	9	294	0.0595	0	9	2	292	0.0572098	394	>200	0
TBC1D23	NC_006088.4	84819457	84850832	+	3	53	0.061	0	3	14	39	0.057244	395	>200	0
PTF1A	NC_006089.4	17419496	17420710	-	3	53	0.061	0	3	1	52	0.057244	396	>200	0
EFHC2	NC_006088.4	111056475	111115975	+	2	24	0.0644	1	1	2	22	0.0591484	397	>200	0
CNGB3	NC_006089.4	123704852	123731705	-	3	54	0.0639	0	3	4	50	0.0598949	398	>200	0
VPS41	NC_006089.4	49443501	49552643	-	4	89	0.0656	0	4	12	77	0.0602164	399	7	4.95233
DUT	NC_006097.4	10134400	10162487	+	4	89	0.0656	0	4	4	85	0.0602164	400	>200	0
MDGA1	NC_006090.4	30022492	30157749	+	5	128	0.0615	0	5	3	125	0.0617566	401	5	5.21659
APOB	NC_006090.4	102659050	102693303	-	5	128	0.0615	0	5	41	87	0.0617566	402	>200	0
RSPO2	NC_006089.4	132121188	132231355	-	3	55	0.0641	0	3	4	51	0.0626023	403	52	3.55705
AGTPBP1	NC_006127.4	40665318	40727334	-	3	55	0.0641	0	3	16	39	0.0626023	404	8	4.82745
ACN9	NC_006089.4	24507072	24534310	+	2	25	0.0668	0	2	0	25	0.0636068	405	>200	0
SHISA3	NC_006091.4	68670390	68672453	-	2	25	0.0668	0	2	0	25	0.0636068	406	>200	0
SOD3	NC_006091.4	74158330	74159924	-	2	25	0.0668	0	2	1	24	0.0636068	407	>200	0
SLC17A6	NC_006092.4	2768719	2800390	+	2	25	0.0668	0	2	6	19	0.0636068	408	9	4.72157
CASZ1	NC_006108.4	3818320	3971564	-	8	256	0.0711	0	8	5	251	0.0639736	409	>200	0
CRADD	NC_006088.4	44903727	44979578	+	1	4	0.0627	0	1	3	1	0.0644045	410	>200	0
GBX1	NC_006089.4	176728	183088	+	1	4	0.0627	0	1	0	4	0.0644045	411	>200	0
AGAP3	NC_006089.4	188968	267596	-	1	4	0.0627	0	1	0	4	0.0644045	412	6	5.15886
DSCC1	NC_006089.4	136780510	136791404	-	1	4	0.0627	0	1	3	1	0.0644045	413	>200	0
PRPS1	NC_006091.4	1986264	1996593	+	1	4	0.0627	0	1	2	2	0.0644045	414	>200	0
TLR1B	NC_006091.4	69951221	69957151	+	1	4	0.0627	0	1	0	4	0.0644045	415	>200	0
TMEM62	NC_006092.4	26042839	26064743	+	1	4	0.0627	0	1	3	1	0.0644045	416	99	2.57935
SMC4	NC_006096.4	22249740	22283219	-	1	4	0.0627	1	0	3	1	0.0644045	417	>200	0
LOC769726	NC_006100.4	3465553	3475666	-	1	4	0.0627	0	1	0	4	0.0644045	418	>200	0
ARHGAP39	NC_006107.4	979376	1021289	-	1	4	0.0627	1	0	2	2	0.0644045	419	28	3.65658
NFRKB	NC_006111.4	1538365	1558007	+	1	4	0.0627	0	1	2	2	0.0644045	420	>200	0
NFASC	NC_006113.4	1889240	1965785	+	1	4	0.0627	0	1	2	2	0.0644045	421	135	2.76203
CRHR1	NC_006114.4	2399395	2423289	+	1	4	0.0627	0	1	1	3	0.0644045	422	4	5.8368
ERCC8	NC_006127.4	18931145	18970561	-	1	4	0.0627	0	1	2	2	0.0644045	423	>200	0
SMC5	NC_006127.4	34954146	35009188	+	1	4	0.0627	0	1	2	2	0.0644045	424	>200	0
CREB5	NC_006089.4	33303477	33554441	+	7	213	0.068	0	7	17	196	0.0647928	425	>200	0
GBA3	NC_006091.4	74859830	74890792	-	13	489	0.0708	0	13	3	486	0.0654331	426	>200	0
LOC418668	NC_006088.4	129326851	129343482	+	7	215	0.0674	1	6	1	214	0.0673783	427	>200	0
UFL1	NC_006090.4	73065340	73086967	-	2	26	0.0694	0	2	8	18	0.0681743	428	>200	0
LOC101748527	NC_006091.4	78800310	78830347	+	2	26	0.0694	1	1	2	24	0.0681743	429	>200	0
HPS6	NC_006093.4	22536444	22540407	-	2	26	0.0694	0	2	1	25	0.0681743	430	>200	0
TMEM2	NC_006127.4	35537496	35590784	-	2	26	0.0694	0	2	18	8	0.0681743	431	>200	0
SLC25A46	NC_006127.4	46823255	46837245	-	2	26	0.0694	0	2	4	22	0.0681743	432	24	3.35809
LOC100857745	NC_006127.4	53179672	53185351	+	2	26	0.0694	0	2	5	21	0.0681743	433	>200	0
ECI2	NC_006089.4	66120356	66150086	+	3	57	0.0683	0	3	2	55	0.0681839	434	>200	0
SLC14A2	NC_006127.4	2248955	2266538	-	3	57	0.0683	0	3	0	57	0.0681839	435	>200	0
SMARCA2	NC_006127.4	26326674	26436626	+	4	93	0.0723	0	4	16	77	0.0684805	436	5	4.36667
SULT6B1	NC_006090.4	33591454	33603221	-	5	132	0.0677	2	3	2	130	0.0685395	437	>200	0
DPH6	NC_006092.4	31989703	32173952	+	8	260	0.0662	0	8	6	254	0.0686439	438	>200	0
NEDD1	NC_006088.4	46033709	46057314	+	7	217	0.0725	0	7	5	212	0.0700249	439	>200	0
PPP1R3A	NC_006088.4	26361962	26388835	+	4	94	0.0728	0	4	5	89	0.0706333	440	>200	0
LOC101748762	NC_006096.4	12132300	12179011	-	9	307	0.0735	0	9	0	307	0.0707659	441	>200	0
PARD3	NC_006089.4	13135918	13570376	+	11	400	0.0753	0	11	23	377	0.0708449	442	>200	0
IKBIP	NC_006088.4	46708852	46717870	-	3	58	0.0703	0	3	2	56	0.0710565	443	>200	0
PVRL3	NC_006088.4	88233733	88296062	+	3	58	0.0703	0	3	6	52	0.0710565	444	>200	0
EGFLAM	NC_006127.4	11920388	11993974	+	3	58	0.0703	0	3	6	52	0.0710565	445	>200	0
CSMD1	NC_006090.4	89500661	90536764	+	7	218	0.0699	0	7	63	155	0.071371	446	3	5.67294
AKAP9	NC_006089.4	22422267	22521444	+	5	134	0.0742	0	5	27	107	0.0720793	447	23	3.08511
OXR1	NC_006089.4	131366995	131610091	+	7	219	0.0775	0	7	16	203	0.0727325	448	9	5.02201
GEN1	NC_006090.4	100629397	100649818	+	2	27	0.0748	0	2	4	23	0.0728461	449	>200	0
IRS4	NC_006091.4	13928276	13949922	+	2	27	0.0748	0	2	7	20	0.0728461	450	>200	0
FAM193A	NC_006091.4	83085298	83144528	-	2	27	0.0748	2	0	19	8	0.0728461	451	>200	0
HSD17B3	NC_006127.4	42112340	42140029	-	2	27	0.0748	2	0	3	24	0.0728461	452	>200	0
CEP162	NC_006090.4	77740043	77787553	+	5	135	0.0761	0	5	6	129	0.073886	453	>200	0
DCBLD2	NC_006088.4	84530862	84573580	+	3	59	0.0795	0	3	4	55	0.0739827	454	>200	0
NRP1	NC_006089.4	13886045	13994988	+	13	501	0.0784	0	13	14	487	0.0756989	455	>200	0
KCNC2	NC_006088.4	37629146	37726368	-	5	136	0.0775	0	5	17	119	0.0757171	456	3	5.76466
SEMA6A	NC_006127.4	72560411	72675842	+	5	136	0.0775	0	5	21	115	0.0757171	457	98	2.84441
BTG1	NC_006088.4	44398412	44400942	-	4	97	0.0803	0	4	1	96	0.0772965	458	>200	0
MAT2B	NC_006100.4	6704768	6715540	-	8	267	0.078	0	8	5	262	0.0773069	459	>200	0
PPIP5K2	NC_006127.4	49970983	50023892	-	2	28	0.0824	0	2	26	2	0.0776176	460	>200	0
TNS1	NC_006094.4	22732771	22773379	+	9	313	0.0763	0	9	3	310	0.0776412	461	>200	0
LOC101748913	NC_006088.4	153734147	153735735	-	4	98	0.0799	0	4	0	98	0.0795851	462	>200	0
FAM38B	NC_006089.4	98155485	98254400	+	4	98	0.0799	1	3	34	64	0.0795851	463	>200	0
LOC101749355	NC_006088.4	1660593	1662455	+	1	5	0.0779	0	1	0	5	0.079847	464	>200	0
ASZ1	NC_006088.4	24657952	24694939	+	1	5	0.0779	0	1	0	5	0.079847	465	>200	0
PLEKHG7	NC_006088.4	44597766	44618159	+	1	5	0.0779	0	1	2	3	0.079847	466	>200	0
YARS2	NC_006088.4	58960268	58974874	+	1	5	0.0779	0	1	1	4	0.079847	467	>200	0
LCA5L	NC_006088.4	108010446	108027612	-	1	5	0.0779	0	1	3	2	0.079847	468	>200	0
ANKRD42	NC_006088.4	189195433	189216428	+	1	5	0.0779	1	0	3	2	0.079847	469	>200	0
POLH	NC_006090.4	30956405	30964870	-	1	5	0.0779	0	1	1	4	0.079847	470	>200	0
C5H11ORF96	NC_006092.4	21670426	21671409	+	1	5	0.0779	0	1	1	4	0.079847	471	>200	0
LOC768589	NC_006094.4	9698206	9701793	+	1	5	0.0779	0	1	0	5	0.079847	472	>200	0
KIAA0040	NC_006095.4	7085944	7093160	+	1	5	0.0779	0	1	0	5	0.079847	473	>200	0
SKOR1	NC_006097.4	19087509	19092370	+	1	5	0.0779	0	1	0	5	0.079847	474	86	3.2687
DPYSL2	NC_006109.4	465423	509780	-	1	5	0.0779	0	1	3	2	0.079847	475	5	4.47833
NUCKS1	NC_006113.4	2263729	2277078	-	1	5	0.0779	0	1	2	3	0.079847	476	>200	0
CDKN2B	NC_006127.4	78638967	78642380	-	1	5	0.0779	0	1	0	5	0.079847	477	>200	0
CCDC112	NC_006127.4	78820868	78829985	-	1	5	0.0779	0	1	2	3	0.079847	478	7	3.87032
LRPPRC	NC_006090.4	25325267	25411220	-	3	61	0.0864	0	3	13	48	0.0799923	479	>200	0
CD180	NC_006127.4	21298370	21307309	-	3	61	0.0864	0	3	0	61	0.0799923	480	>200	0
LOC100858205	NC_006089.4	135959221	136122774	-	6	181	0.0819	0	6	6	175	0.0808963	481	>200	0
MAB21L1	NC_006088.4	173156458	173157771	+	7	225	0.0837	0	7	4	221	0.0812216	482	137	2.56595
ANOS1	NC_006088.4	125695775	125820104	+	5	139	0.0839	0	5	7	132	0.0813565	483	18	3.53859
PMCH	NC_006088.4	55426369	55427759	+	2	29	0.0818	0	2	0	29	0.0824841	484	178	2.51989
SLC1A3	NC_006127.4	11170390	11234982	+	2	29	0.0818	0	2	10	19	0.0824841	485	51	3.18461
LOC427240	NC_006127.4	33347518	33350301	-	2	29	0.0818	0	2	0	29	0.0824841	486	>200	0
BORA	NC_006088.4	156259756	156279329	-	6	182	0.082	0	6	1	181	0.0825499	487	>200	0
FAM19A2	NC_006088.4	32704275	32884563	-	3	62	0.083	0	3	9	53	0.0830741	488	2	6.09658
PHF3	NC_006090.4	85914226	85961823	-	3	62	0.083	0	3	14	48	0.0830741	489	>200	0
GABRG1	NC_006091.4	67576299	67633176	+	3	62	0.083	0	3	11	51	0.0830741	490	11	4.55345
NRXN1	NC_006090.4	6563240	7213964	+	7	228	0.0917	0	7	23	205	0.0856715	491	10	4.83514
TSC22D1	NC_006088.4	167406450	167485135	-	4	101	0.0894	0	4	9	92	0.0866496	492	126	2.31885
CTNND2	NC_006089.4	77650134	78278816	+	5	142	0.0883	0	5	18	124	0.0872126	493	1	5.82143
ITGB8	NC_006089.4	30066911	30127610	+	2	30	0.0889	0	2	14	16	0.0874414	494	113	2.54518
VSNL1	NC_006090.4	100515714	100592236	+	2	30	0.0889	0	2	7	23	0.0874414	495	5	5.94605
KCNIP2	NC_006093.4	22648890	22670345	+	2	30	0.0889	0	2	0	30	0.0874414	496	8	4.561
SEMA3C	NC_006088.4	11040851	11162842	+	4	102	0.0941	0	4	9	93	0.0890699	497	120	2.44423
LOC772269	NC_006091.4	18095520	18115047	-	4	102	0.0941	0	4	1	101	0.0890699	498	>200	0
PDZRN4	NC_006088.4	29040977	29294112	+	6	187	0.0927	0	6	13	174	0.091097	499	4	5.09261
COX7A2L	NC_006090.4	23961824	23966803	-	2	31	0.0949	2	0	2	29	0.0924849	500	>200	0
C6H10ORF71	NC_006093.4	18661432	18680188	+	2	31	0.0949	0	2	6	25	0.0924849	501	>200	0
CCDC147	NC_006093.4	24287886	24343394	+	2	31	0.0949	1	1	5	26	0.0924849	502	>200	0
DHRS3	NC_006108.4	5302593	5342428	+	2	31	0.0949	0	2	7	24	0.0924849	503	>200	0
OLFM4	NC_006088.4	165561980	165586181	-	9	325	0.0992	0	9	2	323	0.0925706	504	>200	0
EXOC4	NC_006088.4	1421469	1841513	-	1	6	0.0942	0	1	1	5	0.0950346	505	>200	0
PHYH	NC_006088.4	6734017	6745767	-	1	6	0.0942	0	1	0	6	0.0950346	506	>200	0
CBLL1	NC_006088.4	14822453	14828993	+	1	6	0.0942	0	1	2	4	0.0950346	507	>200	0
PDHA1	NC_006088.4	120288365	120300463	-	1	6	0.0942	0	1	0	6	0.0950346	508	>200	0
LOC428073	NC_006088.4	170475041	170484951	-	1	6	0.0942	0	1	2	4	0.0950346	509	>200	0
C1H11ORF70	NC_006088.4	182765820	182785257	-	1	6	0.0942	0	1	1	5	0.0950346	510	>200	0
RNF144B	NC_006089.4	60438715	60523441	-	1	6	0.0942	0	1	4	2	0.0950346	511	>200	0
CYP7A1	NC_006089.4	112384150	112391681	-	1	6	0.0942	0	1	3	3	0.0950346	512	>200	0
UTP23	NC_006089.4	135593951	135597685	+	1	6	0.0942	0	1	2	4	0.0950346	513	>200	0
ESF1	NC_006090.4	4530601	4548956	-	1	6	0.0942	0	1	3	3	0.0950346	514	>200	0
SERPINA10	NC_006092.4	45586488	45596494	-	1	6	0.0942	0	1	2	4	0.0950346	515	>200	0
NHLRC2	NC_006093.4	27592286	27630246	+	1	6	0.0942	0	1	5	1	0.0950346	516	>200	0
TECR	NC_006095.4	13758914	13782679	-	1	6	0.0942	1	0	6	0	0.0950346	517	22	3.86035
HAPLN3	NC_006097.4	13042935	13046872	+	1	6	0.0942	0	1	1	5	0.0950346	518	>200	0
MAP2K5	NC_006097.4	18970555	19082529	+	1	6	0.0942	0	1	1	5	0.0950346	519	>200	0
RRN3	NC_006101.4	83579	99026	-	1	6	0.0942	0	1	4	2	0.0950346	520	>200	0
SDR42E2	NC_006101.4	8672474	8684153	+	1	6	0.0942	1	0	3	3	0.0950346	521	>200	0
UBIAD1	NC_006108.4	4191071	4197036	+	1	6	0.0942	0	1	3	3	0.0950346	522	>200	0
KCNV2	NC_006127.4	26606058	26611528	+	1	6	0.0942	0	1	1	5	0.0950346	523	>200	0
IDNK	NC_006127.4	39967877	39976834	+	1	6	0.0942	0	1	1	5	0.0950346	524	>200	0
CARTPT	NC_006127.4	73143788	73145013	+	1	6	0.0942	0	1	0	6	0.0950346	525	52	3.70145
MANEA	NC_006090.4	73424300	73441215	-	5	146	0.0953	0	5	3	143	0.0953525	526	72	2.73317
CNTLN	NC_006127.4	32754457	32946636	+	3	66	0.0979	2	1	13	53	0.0958945	527	>200	0
NTRK2	NC_006127.4	40289003	40499943	+	3	66	0.0979	0	3	26	40	0.0958945	528	7	5.0968
TLE4	NC_006127.4	38471655	38569978	+	8	281	0.0959	0	8	14	267	0.096503	529	>200	0
SET domain containing 5	NC_006099.4	11381637	11442027	+	2	32	0.1055	0	2	17	15	0.0976106	530	>200	0
TENM3	NC_006091.4	40334424	40645412	-	11	426	0.1027	0	11	27	399	0.0987641	531	14	3.60026
ABRA	NC_006089.4	131613633	131620700	-	3	67	0.1018	0	3	0	67	0.0992185	532	>200	0
TRIL	NC_006089.4	33596217	33605224	-	6	192	0.0993	0	6	1	191	0.100103	533	123	2.57288
FAM84A	NC_006090.4	99002437	99011816	+	4	107	0.1073	0	4	6	101	0.101648	534	3	5.28575
CHORDC1	NC_006088.4	187635925	187648345	+	5	149	0.1069	0	5	3	146	0.101702	535	>200	0
CDYL	NC_006089.4	65810175	65914455	-	3	68	0.1081	0	3	9	59	0.102588	536	>200	0
NKX2-1	NC_006092.4	36673616	36680261	-	3	68	0.1081	0	3	2	66	0.102588	537	71	3.08784
ASB5	NC_006091.4	44659406	44693908	-	2	33	0.1048	1	1	11	22	0.102814	538	>200	0
GMNC	NC_006096.4	13851356	13860920	+	2	33	0.1048	0	2	1	32	0.102814	539	77	3.1346
PEX5L	NC_006096.4	17335737	17429168	+	2	33	0.1048	0	2	8	25	0.102814	540	17	4.06497
ZBED4	NC_006088.4	18815682	18840096	+	4	108	0.1037	0	4	10	98	0.104257	541	>200	0
QKI	NC_006090.4	44231755	44374728	-	8	287	0.1051	0	8	17	270	0.105486	542	29	3.20671
CCDC122	NC_006088.4	167166994	167174554	-	3	69	0.1064	0	3	2	67	0.106003	543	>200	0
FAT3	NC_006088.4	186422748	186850194	-	9	336	0.1088	1	8	35	301	0.107629	544	5	5.14229
AASS	NC_006088.4	22864571	22897849	+	2	34	0.1032	0	2	9	25	0.108092	545	>200	0
C11ORF30	NC_006088.4	193747151	193786712	-	2	34	0.1032	1	1	22	12	0.108092	546	>200	0
ABCB5	NC_006089.4	30151560	30189828	+	2	34	0.1032	0	2	11	23	0.108092	547	>200	0
MELK	NC_006127.4	81980860	82003298	-	2	34	0.1032	0	2	0	34	0.108092	548	>200	0
LMO3	NC_006088.4	63380640	63450118	-	7	242	0.1094	0	7	3	239	0.108221	549	1	5.53028
RAB18	NC_006089.4	15789473	15802551	-	3	70	0.1085	0	3	5	65	0.109461	550	87	2.46887
SMPX	NC_006088.4	119106612	119150922	+	1	7	0.1059	0	1	4	3	0.109972	551	>200	0
ANGPTL5	NC_006088.4	182851318	182865385	+	1	7	0.1059	0	1	4	3	0.109972	552	>200	0
NVL	NC_006090.4	17583761	17617979	+	1	7	0.1059	0	1	3	4	0.109972	553	>200	0
HECA	NC_006090.4	54203889	54231566	-	1	7	0.1059	0	1	4	3	0.109972	554	>200	0
LOC100858859	NC_006090.4	63169809	63171839	-	1	7	0.1059	0	1	0	7	0.109972	555	>200	0
LOC421856	NC_006090.4	79900368	79909889	+	1	7	0.1059	0	1	1	6	0.109972	556	>200	0
LRFN5	NC_006092.4	59619587	59666515	-	1	7	0.1059	0	1	0	7	0.109972	557	1	5.76921
FGFBP3	NC_006093.4	20024574	20025547	-	1	7	0.1059	0	1	0	7	0.109972	558	116	2.90676
MPP4	NC_006094.4	11570957	11597199	-	1	7	0.1059	0	1	6	1	0.109972	559	>200	0
VTG2	NC_006095.4	16539948	16560653	+	1	7	0.1059	0	1	2	5	0.109972	560	>200	0
DNAJB4	NC_006095.4	18922418	18947900	-	1	7	0.1059	0	1	2	5	0.109972	561	92	2.39161
KCNIP1	NC_006100.4	3517626	3815112	-	1	7	0.1059	1	0	7	0	0.109972	562	3	4.87551
MTMR3	NC_006102.4	10983392	11057828	-	1	7	0.1059	1	0	7	0	0.109972	563	>200	0
GUSB	NC_006106.4	4902284	4918576	-	1	7	0.1059	1	0	6	1	0.109972	564	>200	0
ZNFX1	NC_006107.4	6906711	6919161	-	1	7	0.1059	1	0	7	0	0.109972	565	>200	0
TMEM171	NC_006127.4	24907671	24918497	-	1	7	0.1059	0	1	1	6	0.109972	566	>200	0
SLCO4C1	NC_006127.4	50256470	50283287	+	1	7	0.1059	0	1	4	3	0.109972	567	>200	0
LOC107052347	NC_006127.4	53251166	53253961	+	1	7	0.1059	0	1	0	7	0.109972	568	>200	0
LOC101748373	NC_006127.4	60812159	60814759	-	1	7	0.1059	0	1	0	7	0.109972	569	>200	0
LAMA4	NC_006090.4	65863938	65961015	+	5	153	0.1092	0	5	18	135	0.110485	570	>200	0
LOC107053591	NC_006092.4	47007100	47010020	+	21	950	0.1133	0	21	0	950	0.112321	571	>200	0
CPED1	NC_006088.4	23271745	23413415	-	2	35	0.1082	0	2	13	22	0.11344	572	>200	0
FUT9	NC_006090.4	73159375	73275217	-	2	35	0.1082	0	2	4	31	0.11344	573	2	5.36722
GLRB	NC_006091.4	21509410	21558077	+	2	35	0.1082	0	2	9	26	0.11344	574	7	4.89308
RAPH1	NC_006094.4	13563579	13648669	+	2	35	0.1082	0	2	16	19	0.11344	575	90	2.41491
RANBP17	NC_006100.4	3309327	3458529	-	2	35	0.1082	2	0	2	33	0.11344	576	>200	0
HIVEP2	NC_006090.4	52801400	52927830	+	4	112	0.1161	1	3	25	87	0.114991	577	5	5.10066
SPOCK3	NC_006091.4	24672479	24837681	-	3	72	0.1145	0	3	11	61	0.116506	578	6	4.73458
CSMD3	NC_006089.4	133686102	134258991	-	8	295	0.1155	0	8	64	231	0.118154	579	5	4.95483
LRP6	NC_006088.4	71744641	71874154	-	2	36	0.1192	0	2	16	20	0.118855	580	>200	0
MAML3	NC_006091.4	29611253	29815133	-	2	36	0.1192	0	2	1	35	0.118855	581	>200	0
CHN1	NC_006094.4	16782766	16862732	+	2	36	0.1192	0	2	9	27	0.118855	582	6	5.63724
GORASP2	NC_006094.4	18254465	18268171	-	2	36	0.1192	0	2	9	27	0.118855	583	>200	0
GORAB	NC_006095.4	4901367	4910343	-	2	36	0.1192	0	2	0	36	0.118855	584	>200	0
KIFAP3	NC_006095.4	5007632	5070397	+	2	36	0.1192	0	2	10	26	0.118855	585	2	5.36095
IGFBP5	NC_006094.4	23358477	23376394	+	9	344	0.1184	0	9	3	341	0.119393	586	>200	0
SLC10A2	NC_006088.4	142662232	142673635	+	5	157	0.1237	0	5	0	157	0.119621	587	>200	0
CMPK2	NC_006090.4	95394054	95401297	-	5	157	0.1237	0	5	0	157	0.119621	588	>200	0
LARGE	NC_006088.4	52727461	53014555	+	6	203	0.122	0	6	15	188	0.121487	589	>200	0
POU4F1	NC_006088.4	153534234	153538704	+	4	115	0.126	0	4	4	111	0.123346	590	154	2.71442
SAMD12	NC_006089.4	136140598	136314898	-	4	115	0.126	0	4	12	103	0.123346	591	3	5.14015
PTPRO	NC_006088.4	62813409	62962667	+	2	37	0.1266	1	1	11	26	0.124332	592	11	4.05914
SMAD9	NC_006088.4	172362594	172405736	+	2	37	0.1266	1	1	14	23	0.124332	593	12	3.4385
ADCY2	NC_006089.4	79497671	79702706	-	2	37	0.1266	0	2	19	18	0.124332	594	7	5.43476
CCDC149	NC_006091.4	74104391	74154994	+	2	37	0.1266	0	2	4	33	0.124332	595	6	5.05949
WDR41	NC_006127.4	23184048	23206766	+	2	37	0.1266	0	2	5	32	0.124332	596	>200	0
ADAMTSL1	NC_006127.4	33118061	33550669	+	2	37	0.1266	0	2	15	22	0.124332	597	>200	0
NTS	NC_006088.4	42173476	42186038	+	1	8	0.1202	0	1	2	6	0.124662	598	60	3.58077
NUP37	NC_006088.4	55472091	55496238	+	1	8	0.1202	0	1	3	5	0.124662	599	>200	0
PLCZ1	NC_006088.4	64235352	64278321	-	1	8	0.1202	0	1	0	8	0.124662	600	>200	0
LOC100857902	NC_006088.4	72060841	72078701	-	1	8	0.1202	0	1	1	7	0.124662	601	>200	0
TBX19	NC_006088.4	84082889	84097141	-	1	8	0.1202	0	1	1	7	0.124662	602	>200	0
IGSF5	NC_006088.4	108094472	108128394	+	1	8	0.1202	0	1	0	8	0.124662	603	>200	0
CCDC169	NC_006088.4	172630332	172660945	+	1	8	0.1202	0	1	2	6	0.124662	604	>200	0
MPHOSPH8	NC_006088.4	179244427	179263797	-	1	8	0.1202	1	0	6	2	0.124662	605	145	2.44124
ENKUR	NC_006089.4	16734469	16743625	+	1	8	0.1202	1	0	3	5	0.124662	606	>200	0
FBXO43	NC_006089.4	128985383	128996184	-	1	8	0.1202	0	1	2	6	0.124662	607	>200	0
SLC25A32	NC_006089.4	130019560	130034422	-	1	8	0.1202	0	1	3	5	0.124662	608	>200	0
BPNT1	NC_006090.4	18832291	18843109	+	1	8	0.1202	0	1	6	2	0.124662	609	>200	0
YIPF3	NC_006090.4	30997179	31002241	+	1	8	0.1202	0	1	4	4	0.124662	610	>200	0
LOC107053041	NC_006090.4	41902665	41908307	-	1	8	0.1202	0	1	0	8	0.124662	611	>200	0
PLN	NC_006090.4	63097976	63102389	-	1	8	0.1202	0	1	1	7	0.124662	612	>200	0
NKX1-2	NC_006093.4	32079068	32081189	-	1	8	0.1202	0	1	0	8	0.124662	613	>200	0
METTL5	NC_006094.4	18668196	18673015	+	1	8	0.1202	0	1	2	6	0.124662	614	>200	0
PDPR	NC_006098.4	1840161	1860861	-	1	8	0.1202	0	1	2	6	0.124662	615	>200	0
POMT1	NC_006104.4	6695504	6709255	+	1	8	0.1202	0	1	3	5	0.124662	616	105	3.03402
PLOD1	NC_006108.4	5514105	5531231	-	1	8	0.1202	1	0	8	0	0.124662	617	>200	0
LRRC2	NC_006127.4	42466804	42537401	+	1	8	0.1202	0	1	2	6	0.124662	618	>200	0
HSD17B4	NC_006127.4	71546991	71602452	-	1	8	0.1202	0	1	4	4	0.124662	619	>200	0
SP8	NC_006089.4	30247258	30251331	-	4	116	0.1216	0	4	4	112	0.126187	620	90	3.07393
SLC5A9	NC_006095.4	22686498	22709436	+	4	116	0.1216	1	3	3	113	0.126187	621	>200	0
PPARGC1A	NC_006091.4	74250323	74596901	+	12	498	0.1232	0	12	18	480	0.126365	622	32	3.67254
ZNF365	NC_006093.4	8214080	8230113	-	6	206	0.1302	0	6	6	200	0.127681	623	31	4.16211
DPT	NC_006088.4	83908125	83937704	+	2	38	0.1324	0	2	2	36	0.129868	624	>200	0
CEP128	NC_006092.4	40708289	40805372	-	2	38	0.1324	1	1	11	27	0.129868	625	>200	0
MAP2	NC_006094.4	2364561	2556189	+	2	38	0.1324	1	1	19	19	0.129868	626	6	5.49309
WNT4	NC_006108.4	6322863	6334599	+	2	38	0.1324	0	2	2	36	0.129868	627	>200	0
DNAH5	NC_006089.4	76876094	76965507	+	3	76	0.135	0	3	37	39	0.131082	628	22	4.10573
HDAC2	NC_006090.4	64980447	65003180	+	3	77	0.1321	0	3	9	68	0.134822	629	>200	0
ARHGAP21	NC_006089.4	16798393	16935397	+	4	119	0.1379	0	4	17	102	0.134872	630	5	4.58968
SP4	NC_006089.4	30491092	30516966	+	4	119	0.1379	0	4	12	107	0.134872	631	30	3.40795
TP63	NC_006096.4	14092020	14188359	-	8	305	0.1358	0	8	7	298	0.135071	632	>200	0
LOC418414	NC_006088.4	87811110	87820729	+	2	39	0.131	0	2	0	39	0.135461	633	>200	0
TTLL2	NC_006090.4	42549507	42554346	+	2	39	0.131	0	2	6	33	0.135461	634	>200	0
C2ORF21	NC_006094.4	2562871	2684471	+	2	39	0.131	1	1	14	25	0.135461	635	>200	0
GPR39	NC_006094.4	29857599	29921978	+	2	39	0.131	0	2	0	39	0.135461	636	74	2.84843
SAP130	NC_006096.4	1471115	1490988	-	2	39	0.131	0	2	7	32	0.135461	637	>200	0
CDH6	NC_006089.4	69532903	69629567	-	7	257	0.1378	0	7	10	247	0.135531	638	78	2.91864
BOD1L1	NC_006091.4	77944806	77981712	+	7	257	0.1378	0	7	25	232	0.135531	639	>200	0
HDAC9	NC_006089.4	29160126	29608767	+	6	211	0.144	0	6	30	181	0.138333	640	2	4.5924
CREBL2	NC_006088.4	72050789	72060671	+	1	9	0.1385	0	1	2	7	0.13911	641	>200	0
ARHGEF19	NC_006088.4	74542237	74578180	-	1	9	0.1385	0	1	7	2	0.13911	642	>200	0
PLA1A	NC_006088.4	80168471	80186361	-	1	9	0.1385	0	1	1	8	0.13911	643	>200	0
CYYR1	NC_006088.4	102882358	102942648	-	1	9	0.1385	0	1	0	9	0.13911	644	>200	0
LOC101748044	NC_006088.4	113985433	113989505	-	1	9	0.1385	0	1	0	9	0.13911	645	>200	0
RP11-26J3.4	NC_006089.4	121421934	121462299	-	1	9	0.1385	0	1	4	5	0.13911	646	>200	0
TMEM55A	NC_006089.4	125284296	125307712	-	1	9	0.1385	0	1	7	2	0.13911	647	>200	0
ZDHHC22	NC_006092.4	39139928	39145501	-	1	9	0.1385	0	1	4	5	0.13911	648	9	5.51282
FAM53B	NC_006093.4	32153419	32192655	-	1	9	0.1385	0	1	2	7	0.13911	649	>200	0
VTG3	NC_006095.4	16589822	16610925	+	1	9	0.1385	0	1	4	5	0.13911	650	>200	0
ZNF639	NC_006096.4	17582088	17586552	-	1	9	0.1385	0	1	1	8	0.13911	651	>200	0
LOC107054517	NC_006100.4	9492842	9493563	+	1	9	0.1385	0	1	0	9	0.13911	652	>200	0
SRM	NC_006108.4	4107128	4114384	-	1	9	0.1385	0	1	6	3	0.13911	653	>200	0
TFAP2E	NC_006110.4	4301523	4317987	-	1	9	0.1385	0	1	3	6	0.13911	654	>200	0
PPAP2A	NC_006127.4	16804910	16861348	-	1	9	0.1385	0	1	3	6	0.13911	655	>200	0
DDX4	NC_006127.4	16929446	16961054	+	1	9	0.1385	0	1	3	6	0.13911	656	>200	0
CDC14B	NC_006127.4	42215289	42263219	-	1	9	0.1385	0	1	6	3	0.13911	657	>200	0
FEM1C	NC_006127.4	78893427	78911552	-	1	9	0.1385	0	1	6	3	0.13911	658	>200	0
EEA1	NC_006088.4	44618268	44689672	-	2	40	0.1411	0	2	18	22	0.141106	659	>200	0
CHRM2	NC_006088.4	57854815	57953564	-	2	40	0.1411	0	2	2	38	0.141106	660	>200	0
ATP1B1	NC_006088.4	83773420	83787119	-	2	40	0.1411	0	2	4	36	0.141106	661	2	5.49347
SFXN2	NC_006093.4	23329825	23333955	+	2	40	0.1411	0	2	0	40	0.141106	662	>200	0
SLC16A7	NC_006088.4	32040996	32123391	+	3	79	0.1403	0	3	2	77	0.14241	663	>200	0
TMPO	NC_006088.4	46669629	46691852	+	3	79	0.1403	0	3	11	68	0.14241	664	>200	0
LOC422264	NC_006091.4	6600434	7056119	-	7	261	0.1455	0	7	7	254	0.143335	665	>200	0
SMOC2	NC_006090.4	41740954	41876958	-	3	80	0.1444	0	3	9	71	0.146256	666	>200	0
PHOX2B	NC_006091.4	68862049	68865858	+	3	80	0.1444	0	3	3	77	0.146256	667	>200	0
RAP1GDS1	NC_006091.4	60076754	60165898	+	5	168	0.1467	0	5	15	153	0.146469	668	11	4.57557
ETNK1	NC_006088.4	66500887	66534184	-	2	41	0.144	0	2	1	40	0.1468	669	10	4.52417
WHDC1	NC_006097.4	11085499	11098277	+	2	41	0.144	0	2	5	36	0.1468	670	>200	0
SUB1	NC_006127.4	9801318	9816323	+	2	41	0.144	0	2	3	38	0.1468	671	62	3.05408
PAX5	NC_006127.4	81789479	81903564	+	2	41	0.144	0	2	2	39	0.1468	672	>200	0
LOC101747503	NC_006088.4	191156148	191157083	+	7	264	0.1482	0	7	0	264	0.149327	673	>200	0
TBCA	NC_006127.4	23086573	23119109	+	4	124	0.1507	0	4	3	121	0.149864	674	>200	0
MSC	NC_006089.4	117631999	117634199	-	3	81	0.1567	0	3	2	79	0.150135	675	>200	0
CPEB2	NC_006091.4	77399636	77451949	-	7	265	0.151	0	7	12	253	0.15135	676	28	2.73214
EYA4	NC_006090.4	56569605	56726344	-	6	217	0.1606	0	6	17	200	0.151642	677	>200	0
MICU2	NC_006088.4	178436428	178574517	+	2	42	0.1554	0	2	6	36	0.15254	678	>200	0
RIPK2	NC_006089.4	124817881	124836836	+	2	42	0.1554	0	2	5	37	0.15254	679	>200	0
ADAMTS20	NC_006088.4	29921578	30007987	-	4	125	0.1527	0	4	24	101	0.152936	680	50	3.27656
AGTR1	NC_006096.4	12398391	12431229	+	4	125	0.1527	0	4	0	125	0.152936	681	>200	0
DDX11	NC_006088.4	59990284	60009856	+	1	10	0.1511	0	1	4	6	0.15332	682	>200	0
GJA3	NC_006088.4	179001812	179015593	+	1	10	0.1511	0	1	4	6	0.15332	683	>200	0
LOC776146	NC_006089.4	41930217	41935593	-	1	10	0.1511	0	1	0	10	0.15332	684	>200	0
IGFBP1	NC_006089.4	55087653	55093886	+	1	10	0.1511	0	1	3	7	0.15332	685	>200	0
TPD52L1	NC_006090.4	60244504	60296746	-	1	10	0.1511	0	1	2	8	0.15332	686	7	3.60632
SCOC	NC_006091.4	29862290	29870883	+	1	10	0.1511	0	1	2	8	0.15332	687	3	4.96208
CCDC34	NC_006092.4	3583591	3604043	-	1	10	0.1511	0	1	0	10	0.15332	688	>200	0
FLVCR2	NC_006092.4	38339274	38370716	+	1	10	0.1511	0	1	2	8	0.15332	689	>200	0
ZBTB37	NC_006095.4	7415361	7434582	-	1	10	0.1511	1	0	9	1	0.15332	690	>200	0
WDFY1	NC_006096.4	8291935	8315316	-	1	10	0.1511	0	1	8	2	0.15332	691	>200	0
USP3	NC_006097.4	3975595	4050316	-	1	10	0.1511	1	0	10	0	0.15332	692	>200	0
ITFG1	NC_006098.4	7701484	7772665	+	1	10	0.1511	0	1	4	6	0.15332	693	9	4.09555
CDC23	NC_006100.4	18175854	18186261	-	1	10	0.1511	1	0	7	3	0.15332	694	>200	0
TMEM100	NC_006105.4	6082456	6088438	-	1	10	0.1511	0	1	0	10	0.15332	695	139	2.36532
GOLPH3	NC_006127.4	9664934	9697216	-	1	10	0.1511	0	1	4	6	0.15332	696	>200	0
C7	NC_006127.4	12937152	12957520	+	1	10	0.1511	1	0	6	4	0.15332	697	>200	0
GNA14	NC_006127.4	37706418	37770612	-	1	10	0.1511	1	0	3	7	0.15332	698	>200	0
KCNN2	NC_006127.4	73269214	73338838	-	1	10	0.1511	0	1	4	6	0.15332	699	3	4.40841
BNC1	NC_006097.4	11292816	11364061	-	3	82	0.152	0	3	8	74	0.154047	700	>200	0
AP3B1	NC_006127.4	22790022	22949379	+	4	126	0.1606	0	4	14	112	0.156032	701	>200	0
PIK3C2G	NC_006088.4	63952670	64233247	+	5	172	0.1574	0	5	7	165	0.156819	702	>200	0
LOC107050425	NC_006088.4	141671993	141674422	+	5	172	0.1574	0	5	0	172	0.156819	703	>200	0
KLHL29	NC_006090.4	104033595	104436710	+	14	625	0.1617	0	14	12	613	0.157536	704	5	5.36146
AGR3	NC_006089.4	28653716	28664156	-	2	43	0.1584	0	2	1	42	0.158323	705	>200	0
ZNF827	NC_006091.4	31465958	31574659	-	2	43	0.1584	0	2	8	35	0.158323	706	33	2.89637
BMP5	NC_006090.4	87684480	87740094	+	3	84	0.1598	0	3	8	76	0.161966	707	>200	0
DLC1	NC_006091.4	64740898	65000807	+	3	84	0.1598	0	3	16	68	0.161966	708	>200	0
VRK2	NC_006090.4	880994	926662	+	4	128	0.1602	0	4	2	126	0.162293	709	>200	0
IL17RA	NC_006088.4	61679204	61701686	+	2	44	0.1638	0	2	0	44	0.164146	710	>200	0
ZDHHC20	NC_006088.4	178578807	178623767	+	2	44	0.1638	0	2	9	35	0.164146	711	>200	0
LOC107052690	NC_006089.4	97538972	97546606	+	2	44	0.1638	0	2	0	44	0.164146	712	>200	0
MAD2L1	NC_006091.4	54891159	54894593	+	2	44	0.1638	0	2	2	42	0.164146	713	>200	0
COX10	NC_006105.4	2633965	2730741	-	2	44	0.1638	0	2	0	44	0.164146	714	>200	0
ADAMTS19	NC_006127.4	45323739	45485345	-	2	44	0.1638	0	2	19	25	0.164146	715	>200	0
TMEM213	NC_006088.4	56373843	56377842	-	1	11	0.1697	0	1	0	11	0.167295	716	>200	0
LOC428404	NC_006089.4	5349126	5386532	+	1	11	0.1697	0	1	4	7	0.167295	717	>200	0
MAP9	NC_006091.4	20782175	20795929	-	1	11	0.1697	0	1	0	11	0.167295	718	2	5.64672
RNF150	NC_006091.4	30008764	30129272	-	1	11	0.1697	0	1	3	8	0.167295	719	3	4.41373
HSPA4L	NC_006091.4	34563092	34585578	+	1	11	0.1697	0	1	7	4	0.167295	720	14	4.1885
ARMC8	NC_006096.4	555199	617326	-	1	11	0.1697	0	1	10	1	0.167295	721	2	5.37386
LOC107054339	NC_006099.4	1081577	1082917	+	1	11	0.1697	0	1	0	11	0.167295	722	>200	0
MAPKAPK3	NC_006099.4	1880037	1922149	+	1	11	0.1697	0	1	3	8	0.167295	723	>200	0
HP1BP3	NC_006108.4	6743514	6763536	+	1	11	0.1697	0	1	7	4	0.167295	724	54	3.11134
LGR6	NC_006113.4	398351	473948	+	1	11	0.1697	0	1	1	10	0.167295	725	>200	0
ZC3H11A	NC_006113.4	471163	486103	+	1	11	0.1697	0	1	1	10	0.167295	726	>200	0
ACO1	NC_006127.4	70963355	71000137	+	1	11	0.1697	0	1	10	1	0.167295	727	>200	0
GXYLT1	NC_006088.4	29464170	29495248	-	5	176	0.1749	0	5	6	170	0.167457	728	>200	0
ZIC5	NC_006088.4	144294676	144297018	+	3	86	0.1723	0	3	1	85	0.170003	729	>200	0
COL22A1	NC_006089.4	144643944	144875147	-	3	86	0.1723	0	3	7	79	0.170003	730	>200	0
XYLT1	NC_006101.4	8053112	8206587	+	3	86	0.1723	0	3	4	82	0.170003	731	12	3.66003
LOC107052760	NC_006089.4	127839090	127850189	+	2	45	0.1693	0	2	0	45	0.170006	732	>200	0
MCFD2	NC_006090.4	27005839	27009880	-	2	45	0.1693	0	2	3	42	0.170006	733	>200	0
NBEA	NC_006088.4	172991191	173479832	-	5	177	0.1673	0	5	50	127	0.170161	734	2	5.2007
TLE1	NC_006127.4	39181674	39255320	-	6	225	0.1707	1	5	16	209	0.170227	735	>200	0
KIAA1217	NC_006089.4	16937283	17288233	-	4	132	0.1742	0	4	23	109	0.175079	736	>200	0
LOC421099	NC_006089.4	106851531	106882573	-	2	46	0.1801	0	2	4	42	0.175901	737	>200	0
BTBD9	NC_006090.4	29594124	29704099	+	2	46	0.1801	0	2	9	37	0.175901	738	15	4.91942
OTP	NC_006127.4	23139063	23144986	+	2	46	0.1801	0	2	0	46	0.175901	739	76	3.31215
TRPM3	NC_006127.4	35076477	35338965	-	2	46	0.1801	0	2	32	14	0.175901	740	25	3.94092
TDRD15	NC_006090.4	102733739	102742985	+	9	378	0.1816	0	9	1	377	0.176585	741	>200	0
STAP1	NC_006091.4	51947997	51960587	+	3	88	0.1808	0	3	1	87	0.178152	742	>200	0
GRAMD3	NC_006127.4	78952356	78994120	-	4	133	0.1781	0	4	3	130	0.178328	743	>200	0
TRHDE	NC_006088.4	36640178	36861001	+	5	180	0.1814	0	5	18	162	0.17837	744	1	5.86822
TOX3	NC_006098.4	5324989	5446431	+	10	431	0.1738	0	10	8	423	0.179376	745	83	2.67928
LOC107053823	NC_006094.4	20583219	20583878	-	6	229	0.1801	0	6	0	229	0.179858	746	>200	0
KCNMB4	NC_006088.4	35820990	35831958	+	1	12	0.1777	0	1	1	11	0.18104	747	4	4.95594
LOC101751545	NC_006088.4	72108973	72122781	-	1	12	0.1777	0	1	0	12	0.18104	748	>200	0
XCL1	NC_006088.4	83995577	83999551	+	1	12	0.1777	0	1	0	12	0.18104	749	>200	0
GK	NC_006088.4	115732313	115768596	-	1	12	0.1777	1	0	8	4	0.18104	750	>200	0
LOC771176	NC_006088.4	140082568	140098127	+	1	12	0.1777	0	1	1	11	0.18104	751	>200	0
DLX5	NC_006089.4	24479856	24482113	-	1	12	0.1777	0	1	3	9	0.18104	752	21	4.35897
PTDSS1	NC_006089.4	127398648	127428269	+	1	12	0.1777	0	1	7	5	0.18104	753	>200	0
LIN9	NC_006090.4	17065164	17104451	+	1	12	0.1777	1	0	10	2	0.18104	754	>200	0
SRD5A2	NC_006090.4	33821086	33842280	+	1	12	0.1777	0	1	3	9	0.18104	755	>200	0
TSSC1	NC_006090.4	93955305	94020033	-	1	12	0.1777	1	0	6	6	0.18104	756	>200	0
CHRNA9	NC_006091.4	69390132	69394616	-	1	12	0.1777	0	1	1	11	0.18104	757	>200	0
EVC	NC_006091.4	79741022	79794167	+	1	12	0.1777	1	0	5	7	0.18104	758	>200	0
LOC100859381	NC_006091.4	82188951	82189818	-	1	12	0.1777	0	1	0	12	0.18104	759	>200	0
ANKRD1	NC_006093.4	19643920	19652608	-	1	12	0.1777	0	1	2	10	0.18104	760	>200	0
KIF20B	NC_006093.4	19919828	19949835	-	1	12	0.1777	0	1	1	11	0.18104	761	>200	0
CTLA4	NC_006094.4	13462499	13465952	-	1	12	0.1777	0	1	5	7	0.18104	762	>200	0
HOXD1	NC_006094.4	16318551	16324044	-	1	12	0.1777	0	1	0	12	0.18104	763	124	2.87513
C12H3ORF18	NC_006099.4	1769079	1780230	-	1	12	0.1777	0	1	0	12	0.18104	764	>200	0
CISH	NC_006099.4	1870818	1875257	-	1	12	0.1777	0	1	0	12	0.18104	765	>200	0
DGCR2	NC_006102.4	7922297	7959833	+	1	12	0.1777	1	0	8	4	0.18104	766	114	2.41133
TMEM45B	NC_006111.4	1415937	1424805	+	1	12	0.1777	0	1	0	12	0.18104	767	>200	0
LRIG2	NC_006113.4	3637024	3655454	+	1	12	0.1777	0	1	5	7	0.18104	768	24	3.25394
KLF9	NC_006127.4	35017965	35033708	-	1	12	0.1777	0	1	5	7	0.18104	769	5	3.55158
PRR16	NC_006127.4	71147075	71300718	-	1	12	0.1777	0	1	3	9	0.18104	770	>200	0
TRIM36	NC_006127.4	78752770	78779016	-	1	12	0.1777	0	1	7	5	0.18104	771	68	3.52644
EPHA3	NC_006088.4	89165086	89386165	+	2	47	0.1838	0	2	4	43	0.181827	772	10	4.18014
RSU1	NC_006089.4	20025052	20125218	+	2	47	0.1838	0	2	7	40	0.181827	773	>200	0
HNF4G	NC_006089.4	119106351	119164146	+	8	330	0.1846	0	8	8	322	0.18226	774	>200	0
MKX	NC_006089.4	15690886	15734348	+	3	89	0.1928	0	3	6	83	0.182266	775	20	4.34693
LRP12	NC_006089.4	130597099	130649719	-	4	136	0.1881	0	4	17	119	0.188194	776	89	2.63698
NOL4	NC_006089.4	107397574	107585507	-	3	91	0.1877	1	2	15	76	0.190568	777	2	5.54698
DACH2	NC_006091.4	8316228	8581136	-	4	137	0.1934	0	4	4	133	0.191521	778	6	5.00801
TTLL12	NC_006088.4	68594265	68614441	-	2	49	0.1963	0	2	5	44	0.193763	779	>200	0
MAN2A1	NC_006127.4	47152077	47271357	-	2	49	0.1963	0	2	20	29	0.193763	780	>200	0
SPIC	NC_006088.4	55755823	55766132	-	1	13	0.1876	0	1	1	12	0.194558	781	>200	0
TRA2A	NC_006089.4	31337784	31361540	-	1	13	0.1876	0	1	6	7	0.194558	782	>200	0
RBMX	NC_006091.4	4433520	4448293	-	1	13	0.1876	1	0	9	4	0.194558	783	>200	0
INTU	NC_006091.4	34512516	34556038	+	1	13	0.1876	0	1	4	9	0.194558	784	>200	0
BDNF	NC_006092.4	3715001	3758097	-	1	13	0.1876	1	0	3	10	0.194558	785	7	5.0939
FSIP1	NC_006092.4	29562413	29633866	+	1	13	0.1876	0	1	3	10	0.194558	786	>200	0
F3	NC_006095.4	13555297	13561669	+	1	13	0.1876	0	1	1	12	0.194558	787	>200	0
MUTYH	NC_006095.4	21103633	21107832	-	1	13	0.1876	0	1	0	13	0.194558	788	>200	0
MBTD1	NC_006105.4	5122723	5152124	-	1	13	0.1876	1	0	13	0	0.194558	789	>200	0
ANKRD13B	NC_006106.4	6071556	6078737	+	1	13	0.1876	0	1	0	13	0.194558	790	7	4.91126
ENHO	NC_006127.4	7905609	7907456	-	1	13	0.1876	0	1	0	13	0.194558	791	41	3.30072
LOC101749460	NC_006127.4	20908819	20923821	-	1	13	0.1876	0	1	0	13	0.194558	792	>200	0
KIAA0020	NC_006127.4	26629657	26654133	-	1	13	0.1876	0	1	8	5	0.194558	793	>200	0
KIAA1024L	NC_006127.4	45311582	45319633	-	1	13	0.1876	0	1	1	12	0.194558	794	>200	0
IDS	NC_006091.4	18130776	18163868	+	5	186	0.1952	0	5	9	177	0.195218	795	9	4.95135
ANKS1B	NC_006088.4	46756364	47168914	-	3	93	0.2014	0	3	27	66	0.198964	796	11	4.25049
FBXL7	NC_006089.4	76053432	76223616	-	2	50	0.1995	0	2	3	47	0.199769	797	>200	0
CDC42EP3	NC_006090.4	31853405	31879603	-	2	50	0.1995	1	1	6	44	0.199769	798	>200	0
VPS13D	NC_006108.4	5362250	5451040	-	2	50	0.1995	0	2	26	24	0.199769	799	>200	0
RIMS2	NC_006089.4	130074649	130519695	+	3	94	0.1982	1	2	38	56	0.203195	800	7	4.86586
HS3ST1	NC_006091.4	78613856	78624957	+	6	239	0.2091	0	6	5	234	0.204841	801	>200	0
MARCKS	NC_006090.4	65048005	65051496	-	4	141	0.2141	0	4	3	138	0.205008	802	153	2.27149
TENM4	NC_006088.4	191996861	192426122	+	8	341	0.205	0	8	7	334	0.205016	803	4	4.45628
GPAM	NC_006093.4	26632004	26678101	-	2	51	0.2119	0	2	8	43	0.205795	804	>200	0
ZDHHC7	NC_006098.4	17245308	17262718	-	2	51	0.2119	0	2	3	48	0.205795	805	>200	0
COL8A1	NC_006088.4	84257313	84344104	-	3	95	0.2101	0	3	3	92	0.207446	806	>200	0
GNAL	NC_006089.4	97561098	97739849	-	3	95	0.2101	0	3	10	85	0.207446	807	7	5.01777
LOC107052882	NC_006088.4	26354123	26355050	-	1	14	0.2075	0	1	1	13	0.207853	808	>200	0
WASH1	NC_006088.4	60010694	60049933	-	1	14	0.2075	0	1	4	10	0.207853	809	>200	0
FANCB	NC_006088.4	122344590	122360268	+	1	14	0.2075	0	1	0	14	0.207853	810	>200	0
LOC395944	NC_006089.4	5408204	5439442	+	1	14	0.2075	0	1	8	6	0.207853	811	>200	0
HTR5A	NC_006089.4	7746559	7750028	+	1	14	0.2075	0	1	3	11	0.207853	812	8	5.32327
LRRC72	NC_006089.4	28499378	28517020	+	1	14	0.2075	0	1	0	14	0.207853	813	>200	0
KDM1B	NC_006089.4	60544950	60573613	-	1	14	0.2075	1	0	14	0	0.207853	814	>200	0
C2H8ORF84	NC_006089.4	118074513	118085709	-	1	14	0.2075	0	1	2	12	0.207853	815	>200	0
ZBTB10	NC_006089.4	121535226	121564018	+	1	14	0.2075	0	1	8	6	0.207853	816	>200	0
MAP4K3	NC_006090.4	16666555	16727124	-	1	14	0.2075	0	1	11	3	0.207853	817	21	2.84187
RPS6KC1	NC_006090.4	21667362	21752885	-	1	14	0.2075	1	0	13	1	0.207853	818	17	3.81314
SH3BGRL2	NC_006090.4	79619625	79679966	-	1	14	0.2075	0	1	1	13	0.207853	819	>200	0
TMEM14A	NC_006090.4	88783687	88790669	-	1	14	0.2075	0	1	1	13	0.207853	820	10	4.06137
ARFIP1	NC_006091.4	34140471	34181242	+	1	14	0.2075	0	1	10	4	0.207853	821	>200	0
LOC107051746	NC_006091.4	44372907	44375590	+	1	14	0.2075	0	1	0	14	0.207853	822	>200	0
KIF18A	NC_006092.4	3833693	3879098	-	1	14	0.2075	0	1	1	13	0.207853	823	>200	0
KCNA4	NC_006092.4	4465495	4469949	-	1	14	0.2075	0	1	1	13	0.207853	824	5	5.21206
VCAM1	NC_006095.4	11858134	11870089	+	1	14	0.2075	1	0	3	11	0.207853	825	>200	0
MRPS22	NC_006096.4	5879079	5884423	+	1	14	0.2075	0	1	0	14	0.207853	826	>200	0
ATP1B3	NC_006096.4	10273648	10329985	+	1	14	0.2075	1	0	5	9	0.207853	827	>200	0
LPCAT2	NC_006098.4	3756703	3784646	-	1	14	0.2075	0	1	3	11	0.207853	828	>200	0
FGD3	NC_006099.4	6710581	6814000	-	1	14	0.2075	0	1	10	4	0.207853	829	>200	0
NPM1	NC_006100.4	3270998	3282111	-	1	14	0.2075	0	1	2	12	0.207853	830	>200	0
CPEB4	NC_006100.4	9431636	9469395	+	1	14	0.2075	0	1	5	9	0.207853	831	33	2.59974
MRC2	NC_006114.4	2576467	2598511	+	1	14	0.2075	0	1	7	7	0.207853	832	>200	0
USP25	NC_006088.4	98606720	98697017	+	7	291	0.2106	0	7	18	273	0.2081	833	>200	0
ZFP36L1	NC_006092.4	28356093	28359259	+	4	142	0.2092	0	4	6	136	0.208423	834	>200	0
CDCA7	NC_006094.4	17398527	17406419	-	4	142	0.2092	0	4	2	140	0.208423	835	>200	0
LOC107052691	NC_006089.4	97950069	98126597	+	3	96	0.2142	0	3	5	91	0.211717	836	>200	0
LOC100858127	NC_006088.4	13473692	13709420	+	2	52	0.2082	0	2	6	46	0.211841	837	>200	0
VWC2	NC_006089.4	80749490	80808105	+	2	52	0.2082	0	2	3	49	0.211841	838	18	5.56063
LOC100859265	NC_006088.4	82479069	82955894	+	9	398	0.2143	0	9	40	358	0.215093	839	>200	0
SATB1	NC_006089.4	35245573	35336875	-	9	398	0.2143	0	9	12	386	0.215093	840	>200	0
ATAD2B	NC_006090.4	104444004	104516692	-	6	243	0.2207	0	6	23	220	0.215166	841	>200	0
EYA1	NC_006089.4	117347074	117509348	-	5	193	0.217	1	4	18	175	0.215532	842	>200	0
TENM2	NC_006100.4	4819802	5442558	-	10	451	0.2199	0	10	14	437	0.215544	843	3	5.55523
STXBP6	NC_006092.4	32438928	32518625	-	3	97	0.213	0	3	5	92	0.216007	844	97	2.90436
PPM1H	NC_006088.4	33087138	33218701	-	2	53	0.2267	0	2	6	47	0.217904	845	5	4.54395
COL4A2	NC_006088.4	138903996	139053714	+	2	53	0.2267	0	2	5	48	0.217904	846	>200	0
TTC30A	NC_006094.4	15744817	15747320	+	2	53	0.2267	0	2	3	50	0.217904	847	>200	0
FOXL1	NC_006098.4	17583046	17584870	-	2	53	0.2267	0	2	1	52	0.217904	848	>200	0
DCLK2	NC_006091.4	33015387	33093221	+	3	98	0.2256	0	3	7	91	0.220316	849	11	4.48325
NT5C1B	NC_006090.4	101000666	101006629	-	6	245	0.2234	0	6	1	244	0.220395	850	>200	0
NTN4	NC_006088.4	45597984	45634269	-	1	15	0.2182	0	1	2	13	0.220928	851	>200	0
WNK1	NC_006088.4	60503911	60603627	+	1	15	0.2182	1	0	7	8	0.220928	852	>200	0
ASB9	NC_006088.4	122125760	122140056	+	1	15	0.2182	0	1	1	14	0.220928	853	>200	0
MEMO1	NC_006090.4	33756721	33782310	+	1	15	0.2182	0	1	8	7	0.220928	854	>200	0
CORIN	NC_006091.4	67063312	67186506	+	1	15	0.2182	1	0	13	2	0.220928	855	>200	0
RRAS2	NC_006092.4	10326454	10361182	-	1	15	0.2182	0	1	5	10	0.220928	856	>200	0
EXD2	NC_006092.4	28115639	28132835	-	1	15	0.2182	0	1	5	10	0.220928	857	12	4.91964
FAM181A	NC_006092.4	45433942	45437164	+	1	15	0.2182	0	1	2	13	0.220928	858	>200	0
CYP2C45	NC_006093.4	16576638	16581736	+	1	15	0.2182	0	1	0	15	0.220928	859	>200	0
LONP2	NC_006098.4	7501220	7540487	-	1	15	0.2182	0	1	5	10	0.220928	860	>200	0
MGLL	NC_006099.4	9586061	9678239	+	1	15	0.2182	0	1	5	10	0.220928	861	>200	0
NTN4L	NC_006099.4	10727309	10773672	+	1	15	0.2182	0	1	3	12	0.220928	862	>200	0
HAND1	NC_006100.4	12134077	12135178	+	1	15	0.2182	0	1	0	15	0.220928	863	>200	0
SLC25A48	NC_006100.4	15329860	15341982	-	1	15	0.2182	1	0	2	13	0.220928	864	>200	0
QSOX2	NC_006104.4	8505970	8528286	+	1	15	0.2182	0	1	2	13	0.220928	865	>200	0
C21H1ORF174	NC_006108.4	898318	900472	+	1	15	0.2182	0	1	0	15	0.220928	866	>200	0
WNT2B	NC_006113.4	3494780	3506272	+	1	15	0.2182	0	1	0	15	0.220928	867	>200	0
MTMR12	NC_006127.4	9709263	9742498	-	1	15	0.2182	0	1	7	8	0.220928	868	>200	0
SAXO1	NC_006127.4	33559617	33584814	-	1	15	0.2182	0	1	0	15	0.220928	869	>200	0
GBE1	NC_006088.4	95109022	95291668	+	5	195	0.2251	0	5	6	189	0.221455	870	>200	0
RPAP3	NC_006088.4	31426791	31441764	-	2	54	0.2192	0	2	7	47	0.223981	871	>200	0
RNASEH2B	NC_006088.4	169902409	169963726	+	2	54	0.2192	1	1	5	49	0.223981	872	>200	0
CALM	NC_006090.4	27206214	27217719	-	2	54	0.2192	0	2	2	52	0.223981	873	>200	0
MRPS18A	NC_006090.4	30865479	30884790	+	2	54	0.2192	0	2	1	53	0.223981	874	>200	0
LIMCH1	NC_006091.4	68881150	69045985	-	2	54	0.2192	0	2	14	40	0.223981	875	14	3.08391
HS3ST5	NC_006090.4	64736737	64936541	+	4	147	0.226	1	3	10	137	0.225728	876	18	4.36163
MEIS2	NC_006092.4	31240705	31409368	+	10	457	0.2317	0	10	13	444	0.226933	877	9	3.92238
FZD1	NC_006089.4	22162698	22165019	+	5	197	0.228	0	5	1	196	0.227426	878	>200	0
PDE8A	NC_006097.4	10921839	11055102	+	2	55	0.2377	0	2	15	40	0.230071	879	>200	0
DAPK1	NC_006127.4	41280484	41378599	+	2	55	0.2377	0	2	20	35	0.230071	880	77	2.93889
TRIB2	NC_006090.4	98314008	98334985	+	5	198	0.2323	0	5	5	193	0.230429	881	37	2.92756
CENPW	NC_006090.4	59770150	59777194	-	4	149	0.2388	0	4	1	148	0.23275	882	>200	0
GGACT	NC_006088.4	143950576	143980474	+	3	101	0.2359	0	3	0	101	0.23334	883	>200	0
TCF21	NC_006090.4	56452905	56455090	-	3	101	0.2359	0	3	1	100	0.23334	884	>200	0
NDUFS4	NC_006127.4	16103621	16149392	+	3	101	0.2359	0	3	5	96	0.23334	885	>200	0
N6AMT1	NC_006088.4	103950379	103953447	+	1	16	0.2364	0	1	1	15	0.233788	886	>200	0
FZD4	NC_006088.4	188780367	188784816	+	1	16	0.2364	0	1	6	10	0.233788	887	>200	0
WDR86	NC_006089.4	6248796	6267974	-	1	16	0.2364	1	0	3	13	0.233788	888	140	2.58338
BET1	NC_006089.4	23425660	23431574	-	1	16	0.2364	0	1	0	16	0.233788	889	>200	0
MACC1	NC_006089.4	29984704	30019734	-	1	16	0.2364	0	1	6	10	0.233788	890	>200	0
GLB1	NC_006089.4	44582226	44627920	-	1	16	0.2364	0	1	1	15	0.233788	891	>200	0
IGFBP3	NC_006089.4	55103568	55119141	-	1	16	0.2364	0	1	1	15	0.233788	892	>200	0
GEM	NC_006089.4	126586546	126594244	-	1	16	0.2364	0	1	1	15	0.233788	893	>200	0
RRM2B	NC_006089.4	129684601	129700997	-	1	16	0.2364	0	1	5	11	0.233788	894	>200	0
EIF2AK2	NC_006090.4	32071937	32090408	+	1	16	0.2364	0	1	0	16	0.233788	895	>200	0
HMGN3	NC_006090.4	79746281	79770446	+	1	16	0.2364	0	1	2	14	0.233788	896	>200	0
FGF20	NC_006091.4	63679405	63684026	+	1	16	0.2364	0	1	3	13	0.233788	897	>200	0
ANO3	NC_006092.4	3185015	3364210	+	1	16	0.2364	1	0	12	4	0.233788	898	10	5.04467
COX16	NC_006092.4	27534217	27573025	+	1	16	0.2364	0	1	1	15	0.233788	899	>200	0
SLC10A1	NC_006092.4	27873664	27876556	+	1	16	0.2364	0	1	0	16	0.233788	900	>200	0
DCAF17	NC_006094.4	18105710	18124701	-	1	16	0.2364	0	1	9	7	0.233788	901	>200	0
PIK3CA	NC_006096.4	17595691	17617302	-	1	16	0.2364	0	1	11	5	0.233788	902	73	2.30412
GXYLT2	NC_006099.4	16533544	16553698	+	1	16	0.2364	0	1	2	14	0.233788	903	>200	0
MRPL17	NC_006127.4	9297775	9298798	-	1	16	0.2364	0	1	0	16	0.233788	904	>200	0
WFS1	NC_006091.4	80077295	80110740	+	2	56	0.2418	1	1	6	50	0.236171	905	4	4.16791
MYO3B	NC_006094.4	18415583	18563021	-	2	56	0.2418	0	2	18	38	0.236171	906	>200	0
PLEKHB2	NC_006096.4	2215876	2230098	-	2	56	0.2418	0	2	3	53	0.236171	907	9	4.59228
ALG2	NC_006089.4	90006818	90008689	+	3	102	0.2429	0	3	1	101	0.237711	908	13	4.4712
RPS12	NC_006090.4	56961683	56965807	-	3	102	0.2429	0	3	3	99	0.237711	909	>200	0
GJA1	NC_006090.4	61930611	61938109	-	3	102	0.2429	0	3	8	94	0.237711	910	>200	0
FAM19A5	NC_006088.4	17084225	17504584	+	7	304	0.2401	0	7	10	294	0.23908	911	4	5.25211
SALL1	NC_006098.4	6046344	6061077	+	11	518	0.2472	0	11	11	507	0.2406	912	150	2.39515
ZNF438	NC_006089.4	14594837	14636458	+	3	103	0.2408	0	3	3	100	0.242097	913	>200	0
PAN3	NC_006088.4	175943037	176020582	-	2	57	0.2444	1	1	18	39	0.24228	914	>200	0
SPAG6	NC_006089.4	17708283	17743643	-	2	57	0.2444	0	2	9	48	0.24228	915	>200	0
AIG1	NC_006090.4	52657461	52778418	-	2	57	0.2444	0	2	3	54	0.24228	916	175	2.2699
CRB1	NC_006095.4	2492379	2583806	-	2	57	0.2444	0	2	5	52	0.24228	917	>200	0
LOC427439	NC_006127.4	11295476	11454770	+	2	57	0.2444	0	2	42	15	0.24228	918	>200	0
SH3GL2	NC_006127.4	32972022	33061468	+	2	57	0.2444	0	2	5	52	0.24228	919	4	5.2897
LOC107051909	NC_006127.4	2278972	2562641	-	4	152	0.2486	0	4	1	151	0.243381	920	>200	0
IFNG	NC_006088.4	35053221	35057368	-	1	17	0.2383	0	1	0	17	0.246435	921	>200	0
USP44	NC_006088.4	45552791	45570147	-	1	17	0.2383	0	1	6	11	0.246435	922	>200	0
PRR5	NC_006088.4	69762772	69848663	+	1	17	0.2383	0	1	0	17	0.246435	923	>200	0
TRPC6	NC_006088.4	183074650	183169496	+	1	17	0.2383	0	1	10	7	0.246435	924	>200	0
PRSS23	NC_006088.4	188865459	188871732	-	1	17	0.2383	0	1	5	12	0.246435	925	>200	0
WNT3A	NC_006089.4	2498228	2581084	-	1	17	0.2383	0	1	2	15	0.246435	926	>200	0
WNT9A	NC_006089.4	2612416	2663357	+	1	17	0.2383	0	1	0	17	0.246435	927	37	3.30796
JMJD4	NC_006089.4	3250059	3259197	+	1	17	0.2383	0	1	0	17	0.246435	928	142	2.46463
FSBP	NC_006089.4	126663807	126674230	-	1	17	0.2383	0	1	5	12	0.246435	929	>200	0
PRKD3	NC_006090.4	33625688	33670767	-	1	17	0.2383	1	0	14	3	0.246435	930	>200	0
TXLNB	NC_006090.4	54155137	54193341	+	1	17	0.2383	0	1	5	12	0.246435	931	>200	0
BVES	NC_006090.4	69051906	69078558	+	1	17	0.2383	0	1	4	13	0.246435	932	>200	0
RBM47	NC_006091.4	69290584	69365995	+	1	17	0.2383	0	1	3	14	0.246435	933	>200	0
KLHL5	NC_006091.4	69835717	69885127	-	1	17	0.2383	0	1	13	4	0.246435	934	>200	0
TTBK2	NC_006092.4	25879041	25959782	-	1	17	0.2383	0	1	16	1	0.246435	935	5	4.56263
GATA2	NC_006099.4	9198668	9215151	+	1	17	0.2383	1	0	10	7	0.246435	936	>200	0
EIF4E3	NC_006099.4	16301899	16317592	-	1	17	0.2383	0	1	0	17	0.246435	937	>200	0
CYP3A7	NC_006101.4	3928052	3937393	-	1	17	0.2383	0	1	0	17	0.246435	938	>200	0
LOC100858115	NC_006104.4	5108742	5145401	-	1	17	0.2383	0	1	4	13	0.246435	939	>200	0
TTC39B	NC_006127.4	31827834	31905112	-	1	17	0.2383	0	1	10	7	0.246435	940	>200	0
Metazoa_SRP	NC_006127.4	63370810	63454320	-	1	17	0.2383	0	1	1	16	0.246435	941	>200	0
KCNH8	NC_006089.4	35587147	35754357	+	4	153	0.2435	0	4	14	139	0.246949	942	60	3.25064
CNTN5	NC_006088.4	183529156	184134946	-	5	205	0.2543	0	5	18	187	0.251754	943	3	5.29486
SLC35B3	NC_006089.4	64338393	64365868	+	9	416	0.2597	0	9	7	409	0.252279	944	>200	0
CADM2	NC_006088.4	93320468	93976785	-	7	310	0.2531	0	7	23	287	0.253855	945	2	5.58666
ITGBL1	NC_006088.4	143358724	143494428	-	2	59	0.2624	0	2	7	52	0.254515	946	71	2.84432
FANCD2OS	NC_006089.4	47672097	47673717	+	2	59	0.2624	0	2	0	59	0.254515	947	>200	0
SPRR2G	NC_006089.4	47834713	47835794	+	2	59	0.2624	0	2	0	59	0.254515	948	>200	0
ABCA13	NC_006089.4	80203593	80382739	+	2	59	0.2624	0	2	17	42	0.254515	949	>200	0
CPQ	NC_006089.4	127544099	127708625	+	2	59	0.2624	0	2	1	58	0.254515	950	>200	0
PRDM5	NC_006091.4	54584174	54669141	+	2	59	0.2624	0	2	13	46	0.254515	951	>200	0
API5	NC_006092.4	21406791	21420777	+	2	59	0.2624	0	2	6	53	0.254515	952	>200	0
HGF	NC_006088.4	10650355	10713363	+	3	106	0.2574	0	3	18	88	0.255329	953	>200	0
INSC	NC_006092.4	10595933	10678529	+	7	311	0.256	0	7	2	309	0.256344	954	>200	0
PRKAR2B	NC_006088.4	14466480	14549861	+	1	18	0.2573	0	1	10	8	0.258874	955	55	3.52621
SLC26A4	NC_006088.4	14798131	14820135	+	1	18	0.2573	0	1	14	4	0.258874	956	130	2.51592
GNS	NC_006088.4	33772628	33793177	-	1	18	0.2573	0	1	3	15	0.258874	957	>200	0
MAP3K7CL	NC_006088.4	104035449	104065213	+	1	18	0.2573	0	1	4	14	0.258874	958	>200	0
GPR64	NC_006088.4	120362431	120417429	+	1	18	0.2573	0	1	11	7	0.258874	959	>200	0
LOC100859557	NC_006089.4	9471846	9511526	-	1	18	0.2573	0	1	7	11	0.258874	960	>200	0
RDH10	NC_006089.4	118162572	118187364	+	1	18	0.2573	0	1	6	12	0.258874	961	>200	0
UQCRB	NC_006089.4	127375290	127380213	-	1	18	0.2573	0	1	1	17	0.258874	962	>200	0
TBC1D31	NC_006089.4	138026788	138051754	+	1	18	0.2573	0	1	9	9	0.258874	963	>200	0
RHPN1	NC_006089.4	148557776	148583594	+	1	18	0.2573	0	1	0	18	0.258874	964	>200	0
WDR26	NC_006090.4	17541602	17573597	+	1	18	0.2573	0	1	11	7	0.258874	965	>200	0
LRRC1	NC_006090.4	88394184	88456515	-	1	18	0.2573	1	0	11	7	0.258874	966	>200	0
MANBA	NC_006091.4	61229303	61288017	-	1	18	0.2573	0	1	4	14	0.258874	967	>200	0
C4H20ORF194	NC_006091.4	89644326	89723562	-	1	18	0.2573	0	1	14	4	0.258874	968	>200	0
LOC378902	NC_006092.4	13059381	13065623	+	1	18	0.2573	0	1	0	18	0.258874	969	>200	0
NEK9	NC_006092.4	38203436	38227085	-	1	18	0.2573	0	1	15	3	0.258874	970	>200	0
TLX1	NC_006093.4	23039305	23045804	-	1	18	0.2573	0	1	2	16	0.258874	971	>200	0
PPP1R9B	NC_006094.4	17668340	17781565	+	1	18	0.2573	0	1	14	4	0.258874	972	6	5.39755
TMEM56	NC_006095.4	13340302	13404111	-	1	18	0.2573	0	1	6	12	0.258874	973	>200	0
HYI	NC_006095.4	19841597	19843957	-	1	18	0.2573	0	1	0	18	0.258874	974	>200	0
TESK2	NC_006095.4	21114238	21183613	-	1	18	0.2573	0	1	5	13	0.258874	975	>200	0
DUSP28	NC_006096.4	2677311	2680770	-	1	18	0.2573	0	1	0	18	0.258874	976	>200	0
FCHO2	NC_006127.4	24927197	25022433	-	1	18	0.2573	0	1	11	7	0.258874	977	>200	0
LOC107052324	NC_006127.4	41619147	41656380	+	1	18	0.2573	0	1	0	18	0.258874	978	>200	0
MYO10	NC_006089.4	75628604	75810694	+	2	60	0.258	0	2	9	51	0.260637	979	>200	0
FAXC	NC_006090.4	71749459	71768906	+	2	60	0.258	0	2	2	58	0.260637	980	9	4.39241
ANO5	NC_006092.4	2699314	2749644	+	2	60	0.258	0	2	6	54	0.260637	981	>200	0
DIAPH3	NC_006088.4	162382456	162621744	+	6	260	0.2572	0	6	14	246	0.260841	982	>200	0
ARX	NC_006088.4	117839213	117844037	+	4	157	0.2696	0	4	2	155	0.261329	983	8	4.87887
TMEM60	NC_006088.4	12504419	12508814	+	3	108	0.2629	0	3	0	108	0.264205	984	>200	0
CLYBL	NC_006088.4	144313811	144445999	-	3	108	0.2629	0	3	7	101	0.264205	985	>200	0
GALNTL6	NC_006091.4	43046286	43478012	+	3	108	0.2629	0	3	8	100	0.264205	986	32	4.12973
SOX11	NC_006090.4	94937212	94939190	+	7	315	0.2684	0	7	2	313	0.266368	987	47	3.38744
PIP4K2A	NC_006089.4	17560249	17660950	+	2	61	0.2711	0	2	13	48	0.266761	988	>200	0
LOC107052520	NC_006089.4	45572800	45575185	-	2	61	0.2711	0	2	1	60	0.266761	989	>200	0
KIF13B	NC_006090.4	106680250	106802736	-	2	61	0.2711	0	2	11	50	0.266761	990	>200	0
NEIL3	NC_006091.4	42524279	42543435	-	2	61	0.2711	0	2	2	59	0.266761	991	>200	0
PTPLB	NC_006094.4	27302564	27322244	-	2	61	0.2711	0	2	8	53	0.266761	992	>200	0
RERG	NC_006088.4	62659915	62767020	-	1	19	0.2673	0	1	2	17	0.271107	993	2	4.58269
ADAMTS5	NC_006088.4	103060976	103107734	-	1	19	0.2673	0	1	2	17	0.271107	994	>200	0
ARF1	NC_006089.4	2395984	2407971	-	1	19	0.2673	0	1	4	15	0.271107	995	>200	0
RANBP9	NC_006089.4	60723916	60761858	-	1	19	0.2673	0	1	9	10	0.271107	996	>200	0
MTERF3	NC_006089.4	127381863	127398477	-	1	19	0.2673	1	0	4	15	0.271107	997	>200	0
RAB3GAP2	NC_006090.4	18766975	18807403	+	1	19	0.2673	0	1	14	5	0.271107	998	>200	0
FBXO30	NC_006090.4	46677810	46694904	-	1	19	0.2673	0	1	12	7	0.271107	999	>200	0
MND1	NC_006091.4	20039959	20089300	+	1	19	0.2673	0	1	4	15	0.271107	1000	>200	0
LOC100858925	NC_006091.4	40157613	40160520	+	1	19	0.2673	0	1	2	17	0.271107	1001	>200	0
NFKB1	NC_006091.4	61175278	61232965	+	1	19	0.2673	0	1	8	11	0.271107	1002	>200	0
FAM98B	NC_006092.4	30715782	30727394	-	1	19	0.2673	0	1	0	19	0.271107	1003	>200	0
GCG	NC_006094.4	21228663	21245452	+	1	19	0.2673	0	1	9	10	0.271107	1004	>200	0
USP13	NC_006096.4	17437022	17477511	-	1	19	0.2673	0	1	7	12	0.271107	1005	>200	0
AP1G1	NC_006098.4	19994665	20039204	+	1	19	0.2673	1	0	19	0	0.271107	1006	>200	0
VLDLR	NC_006127.4	26557504	26572298	+	1	19	0.2673	1	0	13	6	0.271107	1007	73	2.5993
CNTNAP4	NC_006127.4	42831971	43054430	-	1	19	0.2673	0	1	12	7	0.271107	1008	4	5.7492
INSIG2	NC_006094.4	28984337	28997158	-	5	212	0.2747	1	4	5	207	0.273542	1009	>200	0
SP3	NC_006094.4	17146668	17177953	+	4	161	0.2764	0	4	4	157	0.275862	1010	>200	0
HSPBAP1	NC_006094.4	26599873	26632929	-	4	161	0.2764	0	4	5	156	0.275862	1011	>200	0
DSC2	NC_006089.4	106277435	106298893	-	5	213	0.2741	0	5	4	209	0.276687	1012	>200	0
THBS2	NC_006090.4	41483007	41517016	+	3	111	0.276	0	3	21	90	0.277586	1013	>200	0
MRPL23	NC_006092.4	13998239	14009071	-	3	111	0.276	0	3	1	110	0.277586	1014	>200	0
LOC107050336	NC_006088.4	140007190	140014532	+	2	63	0.2789	0	2	0	63	0.279004	1015	>200	0
LOC427201	NC_006127.4	24567402	24702306	-	2	63	0.2789	0	2	5	58	0.279004	1016	>200	0
SVIL	NC_006089.4	14683775	14817866	-	3	112	0.2852	1	2	26	86	0.282061	1017	>200	0
IRAK4	NC_006088.4	30069761	30083570	+	1	20	0.2756	0	1	4	16	0.283139	1018	>200	0
DUSP16	NC_006088.4	71962372	72030637	-	1	20	0.2756	0	1	2	18	0.283139	1019	>200	0
LRRC32	NC_006088.4	193645829	193664980	+	1	20	0.2756	0	1	6	14	0.283139	1020	>200	0
ARHGEF6	NC_006091.4	4400222	4431430	-	1	20	0.2756	1	0	11	9	0.283139	1021	>200	0
POF1B	NC_006091.4	8696314	8713283	+	1	20	0.2756	0	1	1	19	0.283139	1022	>200	0
GUCY1A3	NC_006091.4	20922066	20957629	+	1	20	0.2756	0	1	9	11	0.283139	1023	21	4.55539
LOC100858888	NC_006091.4	40154623	40157559	+	1	20	0.2756	0	1	3	17	0.283139	1024	>200	0
ZDHHC2	NC_006091.4	63583351	63618789	-	1	20	0.2756	0	1	8	12	0.283139	1025	39	3.39144
ATRN	NC_006091.4	89755340	89900137	+	1	20	0.2756	0	1	6	14	0.283139	1026	7	4.25975
COPB1	NC_006092.4	10392668	10409126	-	1	20	0.2756	0	1	13	7	0.283139	1027	>200	0
SHANK2	NC_006092.4	17921423	18266894	-	1	20	0.2756	0	1	10	10	0.283139	1028	8	5.48867
LOC101750183	NC_006092.4	17947715	17953516	-	1	20	0.2756	0	1	3	17	0.283139	1029	>200	0
GEMIN2	NC_006092.4	37633619	37642338	+	1	20	0.2756	0	1	4	16	0.283139	1030	>200	0
RALB	NC_006094.4	25658079	25700298	+	1	20	0.2756	0	1	5	15	0.283139	1031	>200	0
TTC14	NC_006096.4	17238818	17247930	-	1	20	0.2756	0	1	4	16	0.283139	1032	8	4.71953
LOC415478	NC_006097.4	12302556	12346133	-	1	20	0.2756	1	0	4	16	0.283139	1033	>200	0
WBSCR16	NC_006106.4	2611678	2625091	-	1	20	0.2756	0	1	0	20	0.283139	1034	>200	0
FAM219A	NC_006127.4	7668909	7770771	-	1	20	0.2756	0	1	7	13	0.283139	1035	7	5.06584
FST	NC_006127.4	16072452	16078209	+	1	20	0.2756	0	1	6	14	0.283139	1036	>200	0
GCNT1	NC_006127.4	37351636	37364723	+	1	20	0.2756	0	1	1	19	0.283139	1037	>200	0
NPR1	NC_006127.4	67043469	67073325	+	1	20	0.2756	0	1	8	12	0.283139	1038	>200	0
SOX5	NC_006088.4	65660324	66227364	+	2	64	0.2888	0	2	0	64	0.285121	1039	5	4.32781
EFCAB6	NC_006088.4	68955902	68974530	-	2	64	0.2888	0	2	1	63	0.285121	1040	>200	0
SACS	NC_006088.4	177611753	177669819	+	2	64	0.2888	0	2	42	22	0.285121	1041	11	4.10581
TRMT11	NC_006090.4	59896463	59922887	-	2	64	0.2888	0	2	5	59	0.285121	1042	>200	0
MTM1	NC_006091.4	17808968	17851690	-	2	64	0.2888	0	2	8	56	0.285121	1043	>200	0
CCSER1	NC_006091.4	35839697	36458938	+	2	64	0.2888	0	2	4	60	0.285121	1044	6	3.90044
BRD7	NC_006098.4	6630401	6644729	+	2	64	0.2888	0	2	5	59	0.285121	1045	>200	0
TRIB3	NC_006090.4	77331448	77347592	-	3	113	0.2787	0	3	2	111	0.286542	1046	>200	0
MAGI2	NC_006088.4	11695397	12420711	+	4	165	0.3063	0	4	22	143	0.290522	1047	4	5.08417
HIBADH	NC_006089.4	32894744	32977099	-	3	114	0.2908	0	3	6	108	0.291029	1048	>200	0
IGF2	NC_006092.4	13768508	13784637	+	3	114	0.2908	0	3	1	113	0.291029	1049	>200	0
NELL1	NC_006092.4	2196790	2483086	+	2	65	0.2902	0	2	6	59	0.291232	1050	10	4.10763
LOC107053825	NC_006094.4	18349326	18408726	-	2	65	0.2902	0	2	8	57	0.291232	1051	>200	0
C13H5ORF15	NC_006100.4	16135658	16141739	+	2	65	0.2902	0	2	2	63	0.291232	1052	>200	0
SPRED1	NC_006092.4	30750697	30805932	-	5	218	0.2857	0	5	10	208	0.292517	1053	12	3.47411
LOC100859545	NC_006089.4	145096261	145200358	-	4	166	0.295	0	4	11	155	0.294204	1054	>200	0
PLEKHA5	NC_006088.4	64403102	64573979	+	1	21	0.2933	0	1	8	13	0.294972	1055	6	4.21781
LOC107057518	NC_006088.4	116840769	116843133	-	1	21	0.2933	0	1	0	21	0.294972	1056	>200	0
LOC100857292	NC_006088.4	117435547	117444793	-	1	21	0.2933	0	1	0	21	0.294972	1057	>200	0
TMEM196	NC_006089.4	29858038	29874976	-	1	21	0.2933	0	1	7	14	0.294972	1058	5	5.41768
RBM24	NC_006089.4	62121910	62132529	+	1	21	0.2933	0	1	4	17	0.294972	1059	>200	0
TBC1D9	NC_006091.4	29945029	29988803	-	1	21	0.2933	0	1	13	8	0.294972	1060	10	4.62449
SRSF5A	NC_006092.4	28316643	28333243	+	1	21	0.2933	0	1	6	15	0.294972	1061	>200	0
TDP1	NC_006092.4	43714906	43750520	+	1	21	0.2933	0	1	1	20	0.294972	1062	>200	0
KCNH5	NC_006092.4	53576767	53733233	+	1	21	0.2933	0	1	4	17	0.294972	1063	4	5.63282
NAA30	NC_006092.4	55648383	55668690	-	1	21	0.2933	0	1	10	11	0.294972	1064	>200	0
STAG1	NC_006096.4	739282	902608	-	1	21	0.2933	1	0	21	0	0.294972	1065	>200	0
LOC107052128	NC_006097.4	6271936	6337283	+	1	21	0.2933	0	1	0	21	0.294972	1066	>200	0
C10H15ORF26	NC_006097.4	12159575	12164743	-	1	21	0.2933	0	1	0	21	0.294972	1067	>200	0
SEC61A1	NC_006099.4	9549141	9559935	-	1	21	0.2933	0	1	6	15	0.294972	1068	>200	0
PSMB2	NC_006110.4	4285429	4293826	+	1	21	0.2933	0	1	2	19	0.294972	1069	>200	0
BARX2	NC_006111.4	1345215	1371353	+	1	21	0.2933	0	1	0	21	0.294972	1070	>200	0
FREM1	NC_006127.4	31714137	31784601	-	1	21	0.2933	0	1	13	8	0.294972	1071	>200	0
ISOC1	NC_006127.4	45600334	45620788	-	1	21	0.2933	0	1	5	16	0.294972	1072	>200	0
TRABD2A	NC_006127.4	52893378	52980296	-	1	21	0.2933	0	1	3	18	0.294972	1073	>200	0
RAB28	NC_006091.4	78013069	78074270	+	5	219	0.3033	0	5	3	216	0.295702	1074	34	3.4316
CNTN1	NC_006088.4	28910398	28995706	+	2	66	0.2978	0	2	21	45	0.297336	1075	4	5.18147
MPPED1	NC_006088.4	68879988	68943124	+	2	66	0.2978	0	2	9	57	0.297336	1076	2	5.92433
PCP4	NC_006088.4	108143451	108196164	+	2	66	0.2978	0	2	0	66	0.297336	1077	25	4.80736
TMEM126A	NC_006088.4	190311694	190318204	+	2	66	0.2978	0	2	0	66	0.297336	1078	>200	0
LYRM4	NC_006089.4	65669900	65754632	+	2	66	0.2978	0	2	3	63	0.297336	1079	>200	0
FBXL4	NC_006090.4	71900907	71958240	+	2	66	0.2978	0	2	4	62	0.297336	1080	>200	0
ATP11B	NC_006096.4	16480427	16580464	-	6	275	0.3075	0	6	22	253	0.303016	1081	>200	0
GABRB3	NC_006088.4	131393731	131503806	+	2	67	0.3031	0	2	6	61	0.303432	1082	5	5.48913
PCCA	NC_006088.4	143981576	144252580	-	3	117	0.3073	0	3	15	102	0.304515	1083	>200	0
AKAP6	NC_006092.4	34787739	35061556	+	4	169	0.3092	0	4	29	140	0.305283	1084	4	4.85958
ZNF507	NC_006098.4	9887897	9907804	+	6	276	0.3064	0	6	4	272	0.305874	1085	>200	0
RASSF3	NC_006088.4	33665460	33766960	+	1	22	0.298	0	1	8	14	0.306609	1086	>200	0
RPS16	NC_006088.4	39750586	39753559	+	1	22	0.298	0	1	2	20	0.306609	1087	>200	0
MTPN	NC_006088.4	58262001	58299769	+	1	22	0.298	0	1	9	13	0.306609	1088	35	2.9789
PLCXD2	NC_006088.4	88412110	88436077	+	1	22	0.298	0	1	3	19	0.306609	1089	17	3.7787
BACH1	NC_006088.4	104089768	104118358	+	1	22	0.298	0	1	8	14	0.306609	1090	>200	0
LOC107051465	NC_006088.4	148838314	148839811	-	1	22	0.298	0	1	0	22	0.306609	1091	>200	0
KIF6	NC_006090.4	29021497	29163739	+	1	22	0.298	0	1	3	19	0.306609	1092	>200	0
TUBE1	NC_006090.4	65965475	65979092	+	1	22	0.298	0	1	5	17	0.306609	1093	>200	0
KIAA1919	NC_006090.4	66360890	66371123	-	1	22	0.298	0	1	0	22	0.306609	1094	>200	0
CDKN2AIP	NC_006091.4	40108809	40112637	-	1	22	0.298	0	1	3	19	0.306609	1095	>200	0
FAP	NC_006094.4	21188623	21227006	+	1	22	0.298	0	1	11	11	0.306609	1096	>200	0
SLC9A9	NC_006096.4	10731054	10904729	-	1	22	0.298	0	1	5	17	0.306609	1097	>200	0
NPTX2	NC_006101.4	1225897	1236385	+	1	22	0.298	1	0	4	18	0.306609	1098	10	4.47065
PSMG3	NC_006101.4	2628813	2631560	-	1	22	0.298	0	1	1	21	0.306609	1099	>200	0
MMD	NC_006105.4	6019993	6047527	-	1	22	0.298	0	1	2	20	0.306609	1100	78	3.11169
MAGI3	NC_006113.4	3667646	3718891	+	1	22	0.298	0	1	9	13	0.306609	1101	19	3.07638
PPFIA2	NC_006088.4	40204791	40517083	-	2	68	0.3121	0	2	26	42	0.309518	1102	4	5.62715
CCDC91	NC_006088.4	72634321	72889765	+	2	68	0.3121	0	2	8	60	0.309518	1103	>200	0
RDH14	NC_006090.4	100989116	100993730	-	2	68	0.3121	0	2	2	66	0.309518	1104	>200	0
CPPED1	NC_006101.4	262059	303198	-	2	68	0.3121	0	2	1	67	0.309518	1105	>200	0
DIAPH1	NC_006091.4	5835394	5995140	-	4	171	0.3173	0	4	5	166	0.312694	1106	>200	0
CCDC82	NC_006088.4	184977031	184990275	+	3	119	0.3109	0	3	0	119	0.313521	1107	>200	0
CDH20	NC_006089.4	68848681	69192758	-	3	119	0.3109	0	3	9	110	0.313521	1108	10	4.06408
EOMES	NC_006089.4	38739416	38744143	-	2	69	0.3119	1	1	5	64	0.315593	1109	>200	0
GATSL2	NC_006106.4	2515830	2605841	+	2	69	0.3119	0	2	3	66	0.315593	1110	36	3.97875
PDCD6IP	NC_006089.4	44987737	45020584	+	3	120	0.3205	0	3	11	109	0.318026	1111	>200	0
RNF152	NC_006089.4	68733456	68775609	+	3	120	0.3205	0	3	3	117	0.318026	1112	4	4.55134
RSPO3	NC_006090.4	59437846	59497439	-	3	120	0.3205	0	3	7	113	0.318026	1113	>200	0
MDM1	NC_006088.4	35112853	35137249	-	1	23	0.3266	0	1	2	21	0.318055	1114	>200	0
ATP1A1	NC_006088.4	80243658	80267671	-	1	23	0.3266	0	1	8	15	0.318055	1115	>200	0
LOC107049118	NC_006088.4	122719564	122727858	-	1	23	0.3266	0	1	0	23	0.318055	1116	>200	0
C10ORF112	NC_006089.4	18807650	19023102	-	1	23	0.3266	0	1	2	21	0.318055	1117	>200	0
TAC1	NC_006089.4	24672976	24678792	+	1	23	0.3266	0	1	1	22	0.318055	1118	81	3.56128
MACROD2	NC_006090.4	4595775	5391567	+	1	23	0.3266	0	1	3	20	0.318055	1119	4	4.9751
SOS1	NC_006090.4	16621147	16663179	-	1	23	0.3266	0	1	19	4	0.318055	1120	18	3.49875
KCNK16	NC_006090.4	29167113	29177741	+	1	23	0.3266	0	1	3	20	0.318055	1121	>200	0
FBXO5	NC_006090.4	49757053	49762742	-	1	23	0.3266	0	1	0	23	0.318055	1122	>200	0
IRAK1BP1	NC_006090.4	79909975	79923074	-	1	23	0.3266	0	1	3	20	0.318055	1123	12	4.08899
GPM6A	NC_006091.4	44449547	44593482	-	1	23	0.3266	0	1	9	14	0.318055	1124	1	5.81405
EXOC5	NC_006092.4	55709356	55735802	+	1	23	0.3266	0	1	15	8	0.318055	1125	>200	0
ARHGAP29	NC_006095.4	13620609	13671275	+	1	23	0.3266	0	1	14	9	0.318055	1126	>200	0
CHST2	NC_006096.4	10683921	10687122	+	1	23	0.3266	0	1	2	21	0.318055	1127	8	4.32971
MESDC1	NC_006097.4	12224038	12226026	-	1	23	0.3266	0	1	3	20	0.318055	1128	>200	0
SFSWAP	NC_006102.4	2792492	2832182	-	1	23	0.3266	1	0	12	11	0.318055	1129	95	2.61341
RP11-244H3.4	NC_006110.4	4358948	4396285	-	1	23	0.3266	0	1	19	4	0.318055	1130	>200	0
TLK2	NC_006114.4	2526807	2570605	+	1	23	0.3266	0	1	15	8	0.318055	1131	>200	0
TMEM178B	NC_006088.4	57091544	57302451	+	2	70	0.3228	0	2	2	68	0.321656	1132	2	5.336
FGF14	NC_006088.4	142970759	143360978	+	2	70	0.3228	0	2	9	61	0.321656	1133	3	5.78629
MLLT4	NC_006090.4	42233487	42347395	-	2	70	0.3228	0	2	32	38	0.321656	1134	>200	0
THEMIS	NC_006090.4	59149192	59178782	+	2	70	0.3228	0	2	4	66	0.321656	1135	>200	0
LONRF1	NC_006091.4	65126892	65142038	+	2	70	0.3228	0	2	10	60	0.321656	1136	17	3.71627
UMPS	NC_006094.4	28012325	28018163	+	3	121	0.3267	0	3	0	121	0.322532	1137	>200	0
KMT2E	NC_006088.4	13764678	13817455	+	2	71	0.3314	1	1	21	50	0.327705	1138	50	2.44061
LLPH	NC_006088.4	34366644	34369267	-	2	71	0.3314	0	2	1	70	0.327705	1139	>200	0
RAP2A	NC_006088.4	145284875	145317897	-	2	71	0.3314	0	2	9	62	0.327705	1140	95	2.79281
EEF1E1	NC_006089.4	64503692	64520604	+	2	71	0.3314	0	2	2	69	0.327705	1141	>200	0
PCDH19	NC_006091.4	5247641	5300179	+	2	71	0.3314	0	2	6	65	0.327705	1142	1	4.97223
MEIS1	NC_006090.4	10484294	10577707	+	11	563	0.3348	0	11	12	551	0.328356	1143	>200	0
METTL25	NC_006088.4	40708937	40764808	+	1	24	0.3353	0	1	7	17	0.329312	1144	>200	0
NDP	NC_006088.4	111184533	111204535	+	1	24	0.3353	0	1	0	24	0.329312	1145	32	3.23099
LOC101749807	NC_006088.4	113990443	113996789	-	1	24	0.3353	0	1	0	24	0.329312	1146	>200	0
LOC101749197	NC_006088.4	114226428	114237805	-	1	24	0.3353	0	1	0	24	0.329312	1147	>200	0
ACTR3B	NC_006089.4	6817098	6860979	+	1	24	0.3353	0	1	6	18	0.329312	1148	5	5.21957
CYP1B1	NC_006090.4	32002524	32008507	-	1	24	0.3353	0	1	0	24	0.329312	1149	>200	0
SMARCAD1	NC_006091.4	37405684	37447399	+	1	24	0.3353	0	1	6	18	0.329312	1150	>200	0
DCTD	NC_006091.4	40247892	40303696	+	1	24	0.3353	0	1	6	18	0.329312	1151	>200	0
TPM1	NC_006097.4	4105418	4124128	-	1	24	0.3353	0	1	10	14	0.329312	1152	>200	0
GFPT2	NC_006100.4	13925137	13941478	+	1	24	0.3353	0	1	14	10	0.329312	1153	>200	0
IL20RB	NC_006101.4	11851088	11865369	+	1	24	0.3353	0	1	0	24	0.329312	1154	>200	0
CACNG4	NC_006105.4	7311640	7346922	-	1	24	0.3353	0	1	1	23	0.329312	1155	6	4.74728
NCOA3	NC_006107.4	6021356	6107712	+	1	24	0.3353	1	0	16	8	0.329312	1156	>200	0
LPAR1	NC_006127.4	66809125	66877069	-	1	24	0.3353	0	1	3	21	0.329312	1157	>200	0
HAS2	NC_006089.4	137467301	137485205	-	3	123	0.3368	0	3	4	119	0.331543	1158	>200	0
CEP44	NC_006091.4	43989124	44002719	+	3	123	0.3368	0	3	3	120	0.331543	1159	>200	0
VRK1	NC_006092.4	46691972	46725680	+	6	285	0.3361	0	6	6	279	0.331783	1160	>200	0
ZFHX4	NC_006089.4	119722610	119876959	+	9	452	0.339	0	9	14	438	0.331894	1161	80	3.11883
MON2	NC_006088.4	32983617	33054255	+	2	72	0.3342	0	2	29	43	0.33374	1162	>200	0
ANGEL1	NC_006092.4	38923979	38941281	-	2	72	0.3342	0	2	3	69	0.33374	1163	>200	0
XPC	NC_006099.4	10800065	10810432	-	2	72	0.3342	0	2	2	70	0.33374	1164	>200	0
REV1	NC_006088.4	132634326	132687753	-	5	231	0.3399	0	5	15	216	0.334295	1165	>200	0
PRICKLE1	NC_006088.4	29648254	29708379	-	3	124	0.3383	0	3	10	114	0.336048	1166	89	2.81112
SYN3	NC_006088.4	53071986	53277504	+	3	124	0.3383	0	3	3	121	0.336048	1167	22	4.00071
LOC100858320	NC_006090.4	85139324	85914286	+	3	124	0.3383	0	3	15	109	0.336048	1168	>200	0
NFIB	NC_006127.4	31370086	31541122	-	3	124	0.3383	0	3	25	99	0.336048	1169	39	3.44672
DENND1B	NC_006095.4	2339637	2486227	+	2	73	0.3315	0	2	18	55	0.339758	1170	>200	0
LOC769039	NC_006096.4	12963564	12965250	-	2	73	0.3315	0	2	1	72	0.339758	1171	>200	0
TPRKB	NC_006088.4	15698689	15702690	+	1	25	0.3388	0	1	1	24	0.340383	1172	>200	0
CAV1	NC_006088.4	25060566	25074918	-	1	25	0.3388	0	1	0	25	0.340383	1173	>200	0
AC113404.1	NC_006088.4	35215581	35249143	+	1	25	0.3388	0	1	4	21	0.340383	1174	>200	0
KIAA1644	NC_006088.4	69334733	69416977	-	1	25	0.3388	0	1	4	21	0.340383	1175	16	4.44249
GPALPP1	NC_006088.4	167616594	167631381	+	1	25	0.3388	0	1	1	24	0.340383	1176	>200	0
LMBR1	NC_006089.4	8467699	8527399	-	1	25	0.3388	0	1	4	21	0.340383	1177	8	4.44038
SOSTDC1	NC_006089.4	28463811	28468032	-	1	25	0.3388	0	1	6	19	0.340383	1178	>200	0
LOC107051672	NC_006089.4	53383627	53384246	-	1	25	0.3388	0	1	0	25	0.340383	1179	>200	0
PGBD5	NC_006090.4	40444803	40517156	-	1	25	0.3388	0	1	7	18	0.340383	1180	4	5.57622
GAB3	NC_006091.4	14303798	14358700	-	1	25	0.3388	0	1	11	14	0.340383	1181	>200	0
CLOCK	NC_006091.4	65471431	65531356	+	1	25	0.3388	1	0	24	1	0.340383	1182	36	2.57796
SCFD2	NC_006091.4	66173796	66368297	+	1	25	0.3388	0	1	5	20	0.340383	1183	>200	0
ADRA2C	NC_006091.4	82141157	82154008	-	1	25	0.3388	0	1	5	20	0.340383	1184	5	5.31872
TLL2	NC_006093.4	16582437	16673493	-	1	25	0.3388	0	1	4	21	0.340383	1185	>200	0
2019-03-08	NC_006093.4	17663881	17752018	-	1	25	0.3388	1	0	12	13	0.340383	1186	NA	NA
PIKFYVE	NC_006094.4	13864163	13928386	+	1	25	0.3388	1	0	24	1	0.340383	1187	>200	0
LOC107054345	NC_006099.4	1002712	1005895	-	1	25	0.3388	0	1	0	25	0.340383	1188	>200	0
RAB3C	NC_006127.4	18071418	18215991	+	1	25	0.3388	1	0	6	19	0.340383	1189	2	6.08382
NR5A2	NC_006095.4	1591201	1687248	-	5	233	0.3311	0	5	10	223	0.340776	1190	>200	0
NOX3	NC_006090.4	50770754	50828753	-	7	344	0.3456	0	7	15	329	0.341619	1191	10	4.31848
RNF144A	NC_006090.4	95415711	95478949	+	7	345	0.3448	0	7	7	338	0.344272	1192	14	3.9736
BCL11B	NC_006092.4	47863249	47955061	-	15	800	0.3398	0	15	7	793	0.345015	1193	10	4.89336
CCDC85A	NC_006090.4	387475	451264	+	3	126	0.3495	0	3	4	122	0.345051	1194	2	5.46623
STAC	NC_006089.4	45915519	45989376	+	2	74	0.3362	0	2	8	66	0.345759	1195	121	2.77349
CCDC178	NC_006089.4	107039399	107223423	-	2	74	0.3362	0	2	4	70	0.345759	1196	>200	0
POU4F2	NC_006091.4	31826941	31828085	+	2	74	0.3362	0	2	0	74	0.345759	1197	170	2.71989
G2E3	NC_006092.4	34158506	34182804	+	2	74	0.3362	0	2	3	71	0.345759	1198	>200	0
MIS18BP1	NC_006092.4	58849071	58867046	+	2	74	0.3362	0	2	0	74	0.345759	1199	>200	0
ENC1	NC_006127.4	24268951	24281920	+	2	74	0.3362	0	2	8	66	0.345759	1200	3	5.72968
KCNH7	NC_006094.4	20927412	21149819	+	6	290	0.3398	0	6	23	267	0.346293	1201	2	5.58107
LPP	NC_006096.4	14389180	14697383	-	7	346	0.3478	0	7	7	339	0.346926	1202	>200	0
CA8	NC_006089.4	113063770	113116302	-	4	181	0.3517	0	4	7	174	0.349922	1203	>200	0
MTX2	NC_006094.4	16273069	16305950	-	5	236	0.3565	0	5	4	232	0.350514	1204	>200	0
NUDT4	NC_006088.4	44816343	44840242	+	1	26	0.3466	0	1	6	20	0.351271	1205	>200	0
BPGM	NC_006088.4	62238742	62258388	+	1	26	0.3466	0	1	0	26	0.351271	1206	>200	0
RERGL	NC_006088.4	63942213	63953119	-	1	26	0.3466	0	1	0	26	0.351271	1207	>200	0
CAPZA3	NC_006088.4	64278396	64279363	+	1	26	0.3466	0	1	0	26	0.351271	1208	>200	0
PGR	NC_006088.4	183242907	183281319	+	1	26	0.3466	0	1	6	20	0.351271	1209	4	5.31127
NCAPG2	NC_006089.4	9519051	9589344	-	1	26	0.3466	0	1	19	7	0.351271	1210	>200	0
COL1A2	NC_006089.4	23601205	23640175	+	1	26	0.3466	0	1	13	13	0.351271	1211	>200	0
WWP1	NC_006089.4	123599838	123660289	+	1	26	0.3466	1	0	19	7	0.351271	1212	>200	0
RNF19A	NC_006089.4	129040193	129098781	-	1	26	0.3466	0	1	9	17	0.351271	1213	>200	0
MRPL13	NC_006089.4	137017087	137045356	-	1	26	0.3466	0	1	3	23	0.351271	1214	106	3.27495
MAP10	NC_006090.4	39207264	39211764	-	1	26	0.3466	0	1	0	26	0.351271	1215	>200	0
KIAA0922	NC_006091.4	20092017	20162536	+	1	26	0.3466	0	1	16	10	0.351271	1216	>200	0
LOC107051791	NC_006091.4	29604032	29611350	+	1	26	0.3466	0	1	0	26	0.351271	1217	>200	0
SSTR1	NC_006092.4	37394623	37395903	+	1	26	0.3466	0	1	1	25	0.351271	1218	4	5.77931
SYNE3	NC_006092.4	46073507	46134157	-	1	26	0.3466	1	0	7	19	0.351271	1219	>200	0
HHEX	NC_006093.4	20697338	20701603	-	1	26	0.3466	0	1	1	25	0.351271	1220	>200	0
SLC38A11	NC_006094.4	20097632	20120096	+	1	26	0.3466	0	1	3	23	0.351271	1221	>200	0
ACAN	NC_006097.4	13047289	13092387	-	1	26	0.3466	0	1	7	19	0.351271	1222	>200	0
KBTBD12	NC_006099.4	9571024	9608515	-	1	26	0.3466	0	1	2	24	0.351271	1223	>200	0
AGK	NC_006088.4	57332260	57365118	+	2	75	0.3495	0	2	4	71	0.351742	1224	110	2.70101
BRMS1L	NC_006092.4	36396648	36415543	+	2	75	0.3495	0	2	9	66	0.351742	1225	5	4.82359
ATP13A4	NC_006096.4	13108724	13142109	+	2	75	0.3495	0	2	13	62	0.351742	1226	137	2.49218
DCLK1	NC_006088.4	172697183	172935235	+	4	182	0.3553	0	4	24	158	0.353653	1227	2	5.66679
MC2R	NC_006089.4	96729117	96746773	+	3	128	0.352	0	3	1	127	0.354043	1228	>200	0
LTBP1	NC_006090.4	31210814	31393323	-	2	76	0.3602	0	2	18	58	0.357706	1229	>200	0
KCNS3	NC_006090.4	100697798	100720919	+	2	76	0.3602	0	2	8	68	0.357706	1230	47	3.65787
STX18	NC_006091.4	79188642	79244318	-	2	76	0.3602	0	2	2	74	0.357706	1231	>200	0
NMBR	NC_006090.4	53199096	53219633	+	6	294	0.3582	0	6	3	291	0.357942	1232	44	3.58403
LOC107052504	NC_006089.4	25702793	25707750	-	4	184	0.3631	0	4	0	184	0.361113	1233	>200	0
MRAS	NC_006094.4	25369611	25403948	+	4	184	0.3631	0	4	3	181	0.361113	1234	6	5.43922
FAM107B	NC_006088.4	7291661	7413891	-	1	27	0.3604	0	1	6	21	0.36198	1235	>200	0
CNOT2	NC_006088.4	35724872	35814528	+	1	27	0.3604	0	1	12	15	0.36198	1236	>200	0
CUBN	NC_006089.4	19883356	20022521	+	1	27	0.3604	0	1	17	10	0.36198	1237	>200	0
TMEFF1	NC_006089.4	88923053	89047023	+	1	27	0.3604	0	1	10	17	0.36198	1238	82	2.88299
YWHAZ	NC_006089.4	129241567	129267437	-	1	27	0.3604	0	1	7	20	0.36198	1239	4	4.42505
NDRG1	NC_006089.4	142081000	142121250	-	1	27	0.3604	0	1	7	20	0.36198	1240	>200	0
SNAP91	NC_006090.4	77916364	77987347	+	1	27	0.3604	1	0	20	7	0.36198	1241	4	5.55869
CHM	NC_006091.4	8597704	8657052	+	1	27	0.3604	0	1	2	25	0.36198	1242	5	4.44505
PCGF5	NC_006093.4	19697211	19753924	+	1	27	0.3604	0	1	8	19	0.36198	1243	>200	0
BARX1	NC_006099.4	6139852	6142332	+	1	27	0.3604	0	1	0	27	0.36198	1244	>200	0
LOC101751708	NC_006099.4	6382098	6385075	+	1	27	0.3604	0	1	0	27	0.36198	1245	>200	0
RP11-20I23.1	NC_006101.4	13946440	13977360	-	1	27	0.3604	0	1	1	26	0.36198	1246	>200	0
SMURF2	NC_006105.4	6983267	7040532	-	1	27	0.3604	1	0	11	16	0.36198	1247	>200	0
LOC107054765	NC_006106.4	5983819	6020357	-	1	27	0.3604	0	1	3	24	0.36198	1248	>200	0
CCBE1	NC_006127.4	9299906	9388832	-	1	27	0.3604	0	1	7	20	0.36198	1249	>200	0
ZDHHC21	NC_006127.4	31656696	31700920	-	1	27	0.3604	0	1	6	21	0.36198	1250	12	3.1945
RPS23	NC_006127.4	63358843	63360872	+	1	27	0.3604	0	1	0	27	0.36198	1251	>200	0
ID2	NC_006090.4	96269619	96271559	+	7	352	0.3591	0	7	4	348	0.362897	1252	>200	0
TBC1D32	NC_006090.4	61983782	62071669	+	2	77	0.3606	0	2	9	68	0.363649	1253	135	2.57612
RNGTT	NC_006090.4	76121811	76306521	+	2	77	0.3606	0	2	9	68	0.363649	1254	>200	0
NBAS	NC_006090.4	99228887	99390387	-	2	77	0.3606	0	2	19	58	0.363649	1255	>200	0
MYCN	NC_006090.4	99663318	99668347	+	4	185	0.3636	0	4	6	179	0.364842	1256	>200	0
NR4A3	NC_006089.4	89671587	89699002	-	3	131	0.3681	0	3	12	119	0.367499	1257	>200	0
ANKS6	NC_006089.4	88113525	88155443	-	4	186	0.3666	0	4	12	174	0.36857	1258	15	3.68776
MED30	NC_006089.4	135857749	135879580	+	3	132	0.3678	0	3	3	129	0.371974	1259	>200	0
ICOS	NC_006094.4	13431325	13441349	-	3	132	0.3678	0	3	0	132	0.371974	1260	>200	0
CUL2	NC_006089.4	13042803	13088931	+	1	28	0.3736	1	0	21	7	0.372512	1261	>200	0
LOC420721	NC_006089.4	44660867	44705084	-	1	28	0.3736	0	1	5	23	0.372512	1262	>200	0
NAPG	NC_006089.4	98279890	98294398	-	1	28	0.3736	0	1	4	24	0.372512	1263	3	5.37954
RAD21	NC_006089.4	135623585	135647511	-	1	28	0.3736	0	1	9	19	0.372512	1264	>200	0
COLEC10	NC_006089.4	136471584	136492302	+	1	28	0.3736	0	1	2	26	0.372512	1265	>200	0
C3H6ORF120	NC_006090.4	41289352	41292335	-	1	28	0.3736	0	1	2	26	0.372512	1266	>200	0
MEI4	NC_006090.4	80261181	80274670	-	1	28	0.3736	0	1	1	27	0.372512	1267	>200	0
KCTD12	NC_006091.4	11435272	11437386	+	1	28	0.3736	0	1	2	26	0.372512	1268	>200	0
USP38	NC_006091.4	30656888	30678545	+	1	28	0.3736	0	1	13	15	0.372512	1269	>200	0
CITED2	NC_006090.4	54137560	54139018	+	6	300	0.3736	0	6	2	298	0.375456	1270	>200	0
MGST1	NC_006088.4	63308935	63315673	+	2	79	0.3689	0	2	0	79	0.375472	1271	>200	0
LY86	NC_006089.4	65108614	65132206	-	2	79	0.3689	0	2	0	79	0.375472	1272	>200	0
CDH11	NC_006098.4	12274830	12354154	+	3	133	0.3842	1	2	6	127	0.376443	1273	>200	0
SEMA5B	NC_006094.4	26697046	26949365	-	4	189	0.3835	0	4	22	167	0.379744	1274	52	3.10544
KLHL14	NC_006089.4	106913656	106974273	-	3	134	0.3897	0	3	10	124	0.380905	1275	76	3.33723
ARID1B	NC_006090.4	51306805	51625729	+	10	531	0.3774	1	9	20	511	0.38126	1276	>200	0
LOC107052830	NC_006089.4	143796718	143797731	-	2	80	0.3771	0	2	0	80	0.381349	1277	>200	0
MCPH1	NC_006090.4	88911211	89032405	-	2	80	0.3771	0	2	3	77	0.381349	1278	>200	0
SLC8A3	NC_006092.4	27578513	27715375	+	2	80	0.3771	0	2	14	66	0.381349	1279	10	4.59862
ULK4	NC_006089.4	43622235	43843928	-	1	29	0.3737	0	1	10	19	0.38287	1280	>200	0
2019-03-11	NC_006089.4	75992480	76023676	+	1	29	0.3737	0	1	3	26	0.38287	1281	NA	NA
ZNF706	NC_006089.4	129336397	129343185	-	1	29	0.3737	0	1	5	24	0.38287	1282	>200	0
ARC	NC_006089.4	148121849	148128197	-	1	29	0.3737	0	1	0	29	0.38287	1283	13	4.48768
RNF146	NC_006090.4	59405610	59415555	-	1	29	0.3737	0	1	3	26	0.38287	1284	21	3.61917
SMARCA5	NC_006091.4	30830483	30853812	+	1	29	0.3737	0	1	10	19	0.38287	1285	>200	0
PEX16	NC_006092.4	23920304	23926061	+	1	29	0.3737	0	1	3	26	0.38287	1286	>200	0
VAX1	NC_006093.4	29106869	29110316	-	1	29	0.3737	0	1	2	27	0.38287	1287	>200	0
SHCBP1	NC_006098.4	7987710	8002774	+	1	29	0.3737	0	1	2	27	0.38287	1288	>200	0
RNFT2	NC_006102.4	11476824	11504684	-	1	29	0.3737	0	1	0	29	0.38287	1289	6	5.65174
ALC	NC_006104.4	10536613	10537806	-	1	29	0.3737	0	1	0	29	0.38287	1290	>200	0
LOXHD1	NC_006127.4	1904002	2036572	+	1	29	0.3737	1	0	11	18	0.38287	1291	>200	0
CYP3A4	NC_006101.4	3893076	3904532	+	3	135	0.3842	0	3	1	134	0.38536	1292	>200	0
UNC5C	NC_006091.4	58974436	59219642	-	5	247	0.3916	0	5	6	241	0.386287	1293	24	3.23439
PRKCE	NC_006090.4	26292190	26576844	+	2	81	0.3943	0	2	16	65	0.387203	1294	4	5.50345
SMOC1	NC_006092.4	27715458	27835450	-	2	81	0.3943	0	2	6	75	0.387203	1295	169	2.59872
MYLK	NC_006094.4	27324149	27507722	-	2	81	0.3943	0	2	22	59	0.387203	1296	>200	0
FAM92A1	NC_006089.4	126386108	126404518	+	7	362	0.3942	0	7	3	359	0.389619	1297	>200	0
ENS-1	NC_006089.4	36379339	36383561	-	3	136	0.3821	0	3	0	136	0.389807	1298	>200	0
NTNG1	NC_006095.4	821327	967216	+	3	136	0.3821	0	3	11	125	0.389807	1299	3	5.46806
IRF4	NC_006089.4	66711386	66724634	+	2	82	0.3861	0	2	2	80	0.393032	1300	>200	0
VSTM2A	NC_006089.4	82526076	82581354	+	2	82	0.3861	0	2	8	74	0.393032	1301	1	6.60283
MPHOSPH6	NC_006098.4	16021209	16028384	-	2	82	0.3861	0	2	4	78	0.393032	1302	>200	0
LOC107052933	NC_006088.4	44901482	44905021	-	1	30	0.397	0	1	0	30	0.393057	1303	>200	0
SLC22A15	NC_006088.4	80329948	80374636	-	1	30	0.397	0	1	8	22	0.393057	1304	>200	0
APP	NC_006088.4	102610038	102809880	-	1	30	0.397	0	1	9	21	0.393057	1305	4	4.71858
EDAR	NC_006088.4	136463828	136536807	-	1	30	0.397	1	0	5	25	0.393057	1306	>200	0
ZMYM2	NC_006088.4	179049647	179142614	-	1	30	0.397	0	1	20	10	0.393057	1307	132	2.23734
XRCC2	NC_006089.4	6793894	6814080	-	1	30	0.397	0	1	2	28	0.393057	1308	>200	0
GAD2	NC_006089.4	16269696	16302599	-	1	30	0.397	0	1	10	20	0.393057	1309	2	6.20163
MURC	NC_006089.4	89047324	89060431	+	1	30	0.397	0	1	4	26	0.393057	1310	>200	0
ROCK1	NC_006089.4	102467242	102545220	-	1	30	0.397	0	1	25	5	0.393057	1311	>200	0
RP11-463C8.4	NC_006092.4	39111060	39120924	+	1	30	0.397	0	1	1	29	0.393057	1312	>200	0
NTN3	NC_006101.4	14038405	14064834	-	1	30	0.397	0	1	0	30	0.393057	1313	>200	0
LHX3	NC_006104.4	8529942	8535525	+	1	30	0.397	0	1	0	30	0.393057	1314	>200	0
SOGA1	NC_006107.4	2803447	2825403	-	1	30	0.397	0	1	4	26	0.393057	1315	10	3.1285
SMYD2	NC_006090.4	21199122	21226151	-	3	137	0.3884	0	3	4	133	0.394246	1316	>200	0
DLEU7	NC_006088.4	169825186	169833288	-	4	194	0.3952	0	4	0	194	0.398316	1317	2	5.19681
RAD51B	NC_006092.4	28405397	28748814	-	3	138	0.3987	0	3	4	134	0.398677	1318	>200	0
ST6GALNAC3	NC_006095.4	19435572	19551417	-	3	138	0.3987	0	3	8	130	0.398677	1319	74	2.89505
FSTL4	NC_006100.4	16329728	16516436	+	3	138	0.3987	0	3	5	133	0.398677	1320	1	5.57133
KIAA1549	NC_006088.4	56226533	56364935	+	2	83	0.3948	1	1	8	75	0.398835	1321	13	3.37494
SCUBE1	NC_006088.4	68619772	68827088	-	2	83	0.3948	0	2	17	66	0.398835	1322	132	2.81613
TXNRD3	NC_006099.4	10389896	10409621	+	6	309	0.4021	0	6	4	305	0.401751	1323	>200	0
EN1	NC_006094.4	28670390	28673643	+	4	195	0.4012	0	4	2	193	0.40202	1324	38	3.53116
FHIT	NC_006099.4	12184099	12695580	-	7	367	0.3971	0	7	0	367	0.402995	1325	>200	0
SEPHS1	NC_006088.4	6753307	6777219	-	1	31	0.405	0	1	8	23	0.403076	1326	>200	0
ORC5	NC_006088.4	13347695	13416586	-	1	31	0.405	0	1	5	26	0.403076	1327	>200	0
HIST1H2B5L	NC_006088.4	15919466	15937893	-	1	31	0.405	0	1	0	31	0.403076	1328	>200	0
FHL2	NC_006088.4	135229974	135269415	-	1	31	0.405	0	1	4	27	0.403076	1329	>200	0
ATP11A	NC_006088.4	137764523	137886131	-	1	31	0.405	0	1	27	4	0.403076	1330	>200	0
SLITRK5	NC_006088.4	149395768	149401706	-	1	31	0.405	0	1	5	26	0.403076	1331	2	5.44127
NOV	NC_006089.4	136568798	136574083	+	1	31	0.405	0	1	2	29	0.403076	1332	18	4.74024
RMDN2	NC_006090.4	31942389	31985446	+	1	31	0.405	0	1	5	26	0.403076	1333	>200	0
LIN28B	NC_006090.4	69092400	69185795	-	1	31	0.405	0	1	16	15	0.403076	1334	>200	0
GFRAL	NC_006090.4	87878749	87911416	-	1	31	0.405	0	1	4	27	0.403076	1335	12	4.87491
GAB1	NC_006091.4	30724796	30821672	+	1	31	0.405	0	1	10	21	0.403076	1336	>200	0
SLC46A2	NC_006127.4	65846776	65855530	+	1	31	0.405	0	1	1	30	0.403076	1337	>200	0
FRG1	NC_006091.4	63176069	63184089	+	3	139	0.4053	0	3	4	135	0.403099	1338	>200	0
SLC6A6	NC_006099.4	10969748	11019344	+	2	84	0.4022	0	2	12	72	0.404613	1339	>200	0
HS3ST3A1	NC_006105.4	2837459	2864825	+	2	84	0.4022	0	2	1	83	0.404613	1340	>200	0
IGF1	NC_006088.4	55335204	55383631	+	2	85	0.4117	1	1	4	81	0.410363	1341	>200	0
CTDP1	NC_006089.4	56551321	56652498	-	2	85	0.4117	0	2	14	71	0.410363	1342	>200	0
TTC29	NC_006091.4	31837322	32028276	-	2	85	0.4117	0	2	2	83	0.410363	1343	>200	0
ADAMTSL3	NC_006097.4	11478738	11657198	+	2	85	0.4117	0	2	8	77	0.410363	1344	>200	0
ISX	NC_006088.4	52290223	52317487	-	3	141	0.4195	0	3	1	140	0.411913	1345	>200	0
LOC101749060	NC_006088.4	138609097	138653270	-	3	141	0.4195	0	3	7	134	0.411913	1346	>200	0
IL1RAPL2	NC_006091.4	16915784	17258399	+	3	141	0.4195	0	3	13	128	0.411913	1347	83	3.18985
PSAT1	NC_006127.4	37963261	37978946	+	3	141	0.4195	0	3	6	135	0.411913	1348	>200	0
XPOT	NC_006088.4	33606490	33632184	+	1	32	0.4123	0	1	16	16	0.41293	1349	>200	0
MYF6	NC_006088.4	39997995	39999570	+	1	32	0.4123	0	1	2	30	0.41293	1350	>200	0
NHLH2	NC_006088.4	80416900	80418200	+	1	32	0.4123	0	1	1	31	0.41293	1351	42	3.31564
TMEM47	NC_006088.4	113937148	113963939	+	1	32	0.4123	0	1	8	24	0.41293	1352	5	4.08084
VIPR2	NC_006089.4	9667074	9717822	-	1	32	0.4123	0	1	6	26	0.41293	1353	183	2.35146
LOC101749664	NC_006089.4	94599012	94614571	+	1	32	0.4123	0	1	10	22	0.41293	1354	>200	0
UBXN2B	NC_006089.4	112345277	112362321	+	1	32	0.4123	0	1	4	28	0.41293	1355	5	4.68469
MAFA	NC_006089.4	148778567	148780708	-	1	32	0.4123	0	1	0	32	0.41293	1356	>200	0
VIP	NC_006090.4	49646763	49653487	+	1	32	0.4123	0	1	5	27	0.41293	1357	10	6.47608
TPBG	NC_006090.4	78500006	78508083	-	1	32	0.4123	0	1	0	32	0.41293	1358	>200	0
CAPN6	NC_006091.4	13376957	13440483	+	1	32	0.4123	0	1	1	31	0.41293	1359	>200	0
LOC772071	NC_006091.4	14255478	14293353	-	1	32	0.4123	0	1	19	13	0.41293	1360	>200	0
FHDC1	NC_006091.4	34184258	34224284	+	1	32	0.4123	0	1	6	26	0.41293	1361	>200	0
ARAP2	NC_006091.4	70638973	70772169	+	1	32	0.4123	0	1	17	15	0.41293	1362	>200	0
PRIMA1	NC_006092.4	45350875	45393800	-	1	32	0.4123	0	1	1	31	0.41293	1363	64	3.23706
SH2D4B	NC_006093.4	4222934	4294334	-	1	32	0.4123	0	1	5	27	0.41293	1364	27	5.3595
NOC3L	NC_006093.4	20089541	20113485	+	1	32	0.4123	0	1	9	23	0.41293	1365	>200	0
TNR	NC_006095.4	7029648	7082234	+	1	32	0.4123	0	1	5	27	0.41293	1366	7	5.1425
SAP30L	NC_006100.4	12143164	12153071	-	1	32	0.4123	0	1	6	26	0.41293	1367	>200	0
PSD3	NC_006127.4	54545203	54695309	-	1	32	0.4123	1	0	14	18	0.41293	1368	7	5.32148
LSAMP	NC_006088.4	82082453	82236106	+	15	839	0.4161	0	15	5	834	0.413269	1369	2	5.24973
OFCC1	NC_006089.4	63662562	63836899	+	8	430	0.419	0	8	8	422	0.4159	1370	>200	0
RFX6	NC_006090.4	63858461	63892523	-	2	86	0.4131	0	2	11	75	0.416086	1371	>200	0
ERICH1	NC_006090.4	91845628	91939657	+	2	86	0.4131	0	2	1	85	0.416086	1372	>200	0
GRIA3	NC_006091.4	15808026	15949871	-	3	142	0.4123	0	3	13	129	0.416305	1373	2	5.64259
SORCS1	NC_006093.4	25127443	25417233	-	6	314	0.4172	0	6	10	304	0.416334	1374	3	5.11941
EPHA7	NC_006090.4	74171502	74348598	+	7	373	0.4128	0	7	30	343	0.419032	1375	6	5.09623
USH2A	NC_006090.4	20386252	20756743	+	6	315	0.4172	0	6	45	270	0.419246	1376	>200	0
FAM3C	NC_006088.4	23210197	23239646	+	1	33	0.42	0	1	2	31	0.422621	1377	>200	0
TNFRSF19	NC_006088.4	177509039	177565872	-	1	33	0.42	0	1	5	28	0.422621	1378	97	2.70254
BFSP2	NC_006089.4	42762403	42777873	+	1	33	0.42	0	1	6	27	0.422621	1379	>200	0
DPY19L1	NC_006089.4	47460273	47508333	+	1	33	0.42	0	1	11	22	0.422621	1380	>200	0
NDUFV2	NC_006089.4	98878489	98892402	-	1	33	0.42	0	1	3	30	0.422621	1381	>200	0
LOC107052771	NC_006089.4	128458054	128494207	+	1	33	0.42	0	1	3	30	0.422621	1382	>200	0
TATDN1	NC_006089.4	138585818	138599206	-	1	33	0.42	0	1	2	31	0.422621	1383	>200	0
DGKD	NC_006096.4	1203812	1261141	+	1	33	0.42	1	0	24	9	0.422621	1384	>200	0
DOCK3	NC_006099.4	2040917	2182709	+	1	33	0.42	0	1	18	15	0.422621	1385	5	5.59643
CACNG1	NC_006105.4	7298229	7304614	-	1	33	0.42	0	1	0	33	0.422621	1386	>200	0
TPPP2	NC_006127.4	44121753	44122743	-	1	33	0.42	0	1	0	33	0.422621	1387	>200	0
LOC770248	NC_006088.4	169419909	169461313	+	4	201	0.4202	0	4	4	197	0.424145	1388	>200	0
KCTD3	NC_006090.4	20757154	20783006	-	4	201	0.4202	0	4	6	195	0.424145	1389	>200	0
ARPP21	NC_006089.4	45519248	45705504	+	3	144	0.4272	0	3	19	125	0.425056	1390	5	5.38618
NRN1	NC_006089.4	65344314	65351770	+	2	88	0.4259	0	2	3	85	0.427446	1391	24	4.67613
CLN8	NC_006090.4	91341696	91356232	-	2	88	0.4259	0	2	3	85	0.427446	1392	>200	0
ZNF281	NC_006095.4	1514755	1520231	+	2	88	0.4259	0	2	9	79	0.427446	1393	>200	0
ALDH1A2	NC_006097.4	7045146	7099354	+	2	88	0.4259	0	2	12	76	0.427446	1394	>200	0
LOC107052288	NC_006127.4	31137496	31141549	+	2	88	0.4259	0	2	0	88	0.427446	1395	>200	0
SORCS3	NC_006093.4	24428063	24698461	+	5	260	0.4273	0	5	18	242	0.428388	1396	1	6.0848
ZIC1	NC_006096.4	11935072	11938591	+	4	203	0.4314	0	4	4	199	0.431476	1397	16	4.9999
CFTR	NC_006088.4	24554655	24638964	-	1	34	0.4327	0	1	15	19	0.432152	1398	>200	0
UBN2	NC_006088.4	49084371	49141087	+	1	34	0.4327	1	0	25	9	0.432152	1399	>200	0
MED14	NC_006088.4	112228091	112262695	+	1	34	0.4327	0	1	23	11	0.432152	1400	>200	0
MRPL3	NC_006089.4	42030777	42059071	-	1	34	0.4327	0	1	2	32	0.432152	1401	>200	0
TRAIL-LIKE	NC_006091.4	9628199	9634772	-	1	34	0.4327	0	1	0	34	0.432152	1402	>200	0
PAK3	NC_006091.4	13443226	13546727	-	1	34	0.4327	0	1	3	31	0.432152	1403	5	4.62978
ERNI	NC_006092.4	53685990	53689626	-	1	34	0.4327	0	1	0	34	0.432152	1404	>200	0
ABTB1	NC_006099.4	9681792	9708956	-	1	34	0.4327	0	1	7	27	0.432152	1405	>200	0
CNOT6	NC_006100.4	13848781	13878449	-	1	34	0.4327	0	1	17	17	0.432152	1406	>200	0
PCK1	NC_006107.4	11763683	11771405	-	1	34	0.4327	0	1	5	29	0.432152	1407	>200	0
BTBD3	NC_006090.4	13078897	13099494	-	2	89	0.4376	0	2	6	83	0.433083	1408	5	5.16507
TRIM8	NC_006093.4	23278110	23297151	+	2	89	0.4376	0	2	6	83	0.433083	1409	>200	0
NKD1	NC_006098.4	6358177	6468506	-	3	146	0.4315	0	3	16	130	0.433761	1410	>200	0
MSX1	NC_006091.4	79398826	79401315	+	2	90	0.4316	0	2	2	88	0.438689	1411	>200	0
EFTUD1	NC_006097.4	11665567	11721618	+	2	90	0.4316	0	2	13	77	0.438689	1412	>200	0
PTPRN2	NC_006089.4	8816884	9460963	-	6	322	0.4287	0	6	15	307	0.439569	1413	20	3.80203
CD36	NC_006088.4	11180362	11239813	-	1	35	0.4365	0	1	0	35	0.441526	1414	>200	0
LOC107051636	NC_006088.4	16106612	16110126	+	1	35	0.4365	0	1	0	35	0.441526	1415	>200	0
POLR3B	NC_006088.4	53861738	53929245	-	1	35	0.4365	0	1	13	22	0.441526	1416	>200	0
LOC428525	NC_006089.4	103705047	103712206	+	1	35	0.4365	0	1	0	35	0.441526	1417	>200	0
KCNK2	NC_006090.4	20863683	20990422	-	1	35	0.4365	0	1	9	26	0.441526	1418	4	5.56205
GDF7	NC_006090.4	102375914	102382443	+	1	35	0.4365	0	1	0	35	0.441526	1419	>200	0
PDS5A	NC_006091.4	69506359	69578024	+	1	35	0.4365	1	0	28	7	0.441526	1420	>200	0
OSBPL5	NC_006092.4	12895023	13057533	+	1	35	0.4365	0	1	9	26	0.441526	1421	>200	0
SETD3	NC_006092.4	48029936	48083014	-	1	35	0.4365	0	1	6	29	0.441526	1422	>200	0
AHSG	NC_006096.4	16183716	16190209	+	1	35	0.4365	0	1	1	34	0.441526	1423	>200	0
CNTN3	NC_006099.4	16925254	17017528	-	1	35	0.4365	0	1	1	34	0.441526	1424	10	4.28264
NACC2	NC_006104.4	8574504	8624637	+	1	35	0.4365	0	1	0	35	0.441526	1425	8	4.05265
ZBTB40	NC_006108.4	6181909	6216809	-	1	35	0.4365	0	1	0	35	0.441526	1426	>200	0
LRRN3	NC_006088.4	27489294	27526685	-	3	148	0.4445	0	3	7	141	0.442416	1427	3	5.63763
DYNC1I1	NC_006089.4	23970455	24151770	+	3	148	0.4445	0	3	14	134	0.442416	1428	3	5.51255
CDH13	NC_006098.4	16185562	16630514	+	3	148	0.4445	0	3	4	144	0.442416	1429	5	4.15144
ARMC4	NC_006089.4	15602832	15674256	+	2	91	0.4368	0	2	7	84	0.444265	1430	>200	0
SLC35F1	NC_006090.4	63481441	63715415	+	2	91	0.4368	0	2	7	84	0.444265	1431	2	5.69941
SYT4	NC_006127.4	3410683	3422038	+	2	91	0.4368	0	2	6	85	0.444265	1432	4	5.13032
PLSCR5	NC_006096.4	11589502	11611360	-	4	207	0.4463	0	4	6	201	0.446059	1433	>200	0
POLR3A	NC_006093.4	13157953	13189986	+	3	149	0.4483	0	3	19	130	0.446724	1434	>200	0
ZEB1	NC_006089.4	14376486	14497714	-	2	92	0.4439	0	2	10	82	0.449809	1435	62	2.63122
DAP	NC_006089.4	78360494	78404449	+	2	92	0.4439	0	2	1	91	0.449809	1436	>200	0
PPAP2B	NC_006095.4	25774675	25817343	-	2	92	0.4439	0	2	0	92	0.449809	1437	>200	0
GCOM1	NC_006097.4	7190863	7263070	-	2	92	0.4439	0	2	14	78	0.449809	1438	>200	0
KIAA1324L	NC_006088.4	7556873	7650214	+	1	36	0.4436	0	1	15	21	0.450745	1439	32	2.4979
SRGAP1	NC_006088.4	33440188	33580652	+	1	36	0.4436	0	1	15	21	0.450745	1440	4	4.41192
ACSS3	NC_006088.4	40117133	40202461	+	1	36	0.4436	0	1	5	31	0.450745	1441	>200	0
C12ORF45	NC_006088.4	54371086	54375561	-	1	36	0.4436	0	1	1	35	0.450745	1442	>200	0
CALD1	NC_006088.4	62458605	62495064	+	1	36	0.4436	0	1	6	30	0.450745	1443	>200	0
MCF2L	NC_006088.4	137606558	137754936	-	1	36	0.4436	0	1	23	13	0.450745	1444	6	4.95284
TERF1	NC_006089.4	118052592	118075361	+	1	36	0.4436	0	1	2	34	0.450745	1445	>200	0
T	NC_006090.4	43074402	43082303	+	1	36	0.4436	0	1	2	34	0.450745	1446	>200	0
ASRGL1	NC_006090.4	82581609	82604352	+	1	36	0.4436	0	1	2	34	0.450745	1447	149	2.50725
LGSN	NC_006090.4	86054377	86071183	+	1	36	0.4436	0	1	5	31	0.450745	1448	>200	0
BEND4	NC_006091.4	68715738	68746110	+	1	36	0.4436	0	1	5	31	0.450745	1449	>200	0
POLR2L	NC_006092.4	15663779	15665182	+	1	36	0.4436	0	1	1	35	0.450745	1450	>200	0
TMEM150A	NC_006093.4	16928638	16935969	+	1	36	0.4436	0	1	2	34	0.450745	1451	>200	0
RNF32	NC_006089.4	8447769	8465818	+	4	209	0.4508	0	4	1	208	0.453307	1452	>200	0
DNAJB6	NC_006089.4	8685144	8735010	+	6	327	0.4478	0	6	6	321	0.454003	1453	>200	0
HAND2	NC_006091.4	43676569	43677709	-	3	151	0.4475	0	3	1	150	0.4553	1454	>200	0
ATP10A	NC_006088.4	131727581	131838289	+	2	93	0.4558	0	2	19	74	0.455322	1455	>200	0
ZNF236	NC_006089.4	90887127	90969905	-	2	93	0.4558	1	1	31	62	0.455322	1456	>200	0
MAB21L2	NC_006091.4	33261683	33263091	+	3	152	0.4616	0	3	3	149	0.459567	1457	>200	0
TOX	NC_006089.4	112509182	112729765	-	6	329	0.4611	0	6	14	315	0.459752	1458	166	2.42977
NELL2	NC_006088.4	30341808	30485232	-	1	37	0.4556	0	1	7	30	0.459812	1459	6	5.76675
ANO6	NC_006088.4	30599431	30669824	+	1	37	0.4556	0	1	11	26	0.459812	1460	>200	0
MYBPC1	NC_006088.4	55651369	55723422	-	1	37	0.4556	0	1	16	21	0.459812	1461	>200	0
SYT10	NC_006088.4	58697343	58729907	+	1	37	0.4556	0	1	5	32	0.459812	1462	5	4.62694
NSUN3	NC_006088.4	89747236	89766949	+	1	37	0.4556	0	1	1	36	0.459812	1463	>200	0
LOC107055196	NC_006088.4	101037559	101043412	-	1	37	0.4556	0	1	0	37	0.459812	1464	>200	0
IGF2BP3	NC_006089.4	31211306	31318684	-	1	37	0.4556	0	1	13	24	0.459812	1465	>200	0
LOC107052661	NC_006089.4	82247957	82250877	+	1	37	0.4556	0	1	0	37	0.459812	1466	>200	0
OSR2	NC_006089.4	128395565	128412611	+	1	37	0.4556	0	1	5	32	0.459812	1467	>200	0
RGS22	NC_006089.4	128907542	128975264	-	1	37	0.4556	0	1	13	24	0.459812	1468	>200	0
PHIP	NC_006090.4	79784783	79889734	+	1	37	0.4556	0	1	30	7	0.459812	1469	>200	0
VEGFC	NC_006091.4	44787054	44855607	-	1	37	0.4556	0	1	5	32	0.459812	1470	>200	0
SGCZ	NC_006091.4	64476013	64629659	+	1	37	0.4556	0	1	9	28	0.459812	1471	14	4.8348
HECTD1	NC_006092.4	34360922	34414457	-	1	37	0.4556	1	0	34	3	0.459812	1472	>200	0
UBAC1	NC_006104.4	8639575	8660305	+	1	37	0.4556	0	1	2	35	0.459812	1473	>200	0
THAP5	NC_006088.4	28446232	28452655	+	2	94	0.4599	0	2	1	93	0.460803	1474	>200	0
TBC1D4	NC_006088.4	155081350	155199540	+	2	94	0.4599	0	2	14	80	0.460803	1475	>200	0
RNMT	NC_006089.4	96797714	96816653	-	2	94	0.4599	0	2	5	89	0.460803	1476	>200	0
CCDC50	NC_006096.4	13702087	13741863	-	2	94	0.4599	0	2	5	89	0.460803	1477	>200	0
TLR4	NC_006104.4	4083114	4088567	+	3	153	0.4577	0	3	0	153	0.463819	1478	>200	0
ASCL1	NC_006088.4	55116730	55118741	-	2	95	0.474	0	2	3	92	0.466252	1479	39	3.47767
SNX16	NC_006089.4	122059414	122083430	-	2	95	0.474	0	2	7	88	0.466252	1480	10	4.21905
PTPRK	NC_006090.4	58875074	59133829	+	2	95	0.474	0	2	30	65	0.466252	1481	>200	0
HSF2	NC_006090.4	61487545	61508793	-	2	95	0.474	0	2	6	89	0.466252	1482	>200	0
GSC	NC_006092.4	45795959	45797259	-	2	95	0.474	0	2	1	94	0.466252	1483	>200	0
PCDH9	NC_006088.4	159096586	159805221	+	7	391	0.4686	0	7	19	372	0.466803	1484	165	2.49727
MTNR1B	NC_006088.4	186280285	186300517	-	3	154	0.4663	0	3	0	154	0.468056	1485	>200	0
ZNF800	NC_006088.4	20866983	20887718	+	1	38	0.4674	0	1	12	26	0.46873	1486	>200	0
ARL8BL	NC_006088.4	22062046	22089723	-	1	38	0.4674	0	1	2	36	0.46873	1487	>200	0
ARFGEF1	NC_006089.4	115784187	115869658	-	1	38	0.4674	1	0	25	13	0.46873	1488	>200	0
GDAP1	NC_006089.4	118637159	118644509	+	1	38	0.4674	0	1	2	36	0.46873	1489	5	4.8208
MTR	NC_006090.4	37697679	37747086	-	1	38	0.4674	0	1	17	21	0.46873	1490	>200	0
LOC101751936	NC_006090.4	61149287	61200823	+	1	38	0.4674	0	1	0	38	0.46873	1491	>200	0
LOC107053122	NC_006090.4	81697458	81699579	+	1	38	0.4674	0	1	0	38	0.46873	1492	>200	0
COMMD5	NC_006091.4	16781118	16801241	-	1	38	0.4674	0	1	3	35	0.46873	1493	>200	0
INPP4B	NC_006091.4	30313799	30592385	-	1	38	0.4674	0	1	15	23	0.46873	1494	>200	0
LTK	NC_006092.4	24705763	24791238	-	1	38	0.4674	0	1	14	24	0.46873	1495	157	2.8725
CCDC85C	NC_006092.4	48096192	48197922	-	1	38	0.4674	0	1	5	33	0.46873	1496	10	3.82839
SLC38A6	NC_006092.4	54301649	54341042	-	1	38	0.4674	0	1	4	34	0.46873	1497	>200	0
C10ORF12	NC_006093.4	22415367	22422634	-	1	38	0.4674	0	1	7	31	0.46873	1498	>200	0
TRIP12	NC_006096.4	10053471	10120045	-	1	38	0.4674	1	0	36	2	0.46873	1499	>200	0
LOC426155	NC_006127.4	24758262	24760494	+	1	38	0.4674	0	1	1	37	0.46873	1500	>200	0
PRUNE2	NC_006127.4	37394772	37528680	-	1	38	0.4674	0	1	16	22	0.46873	1501	107	2.76912
EIF3H	NC_006089.4	135502011	135582971	-	4	214	0.4747	0	4	7	207	0.471285	1502	>200	0
ARL15	NC_006127.4	16200052	16414582	-	2	96	0.468	0	2	12	84	0.471668	1503	4	5.01155
ST6GALNAC5	NC_006095.4	19311550	19378660	-	3	155	0.4736	0	3	2	153	0.472279	1504	5	5.31175
SIX2	NC_006090.4	25957358	25960415	-	3	156	0.473	0	3	1	155	0.476486	1505	>200	0
LRIG3	NC_006088.4	31717916	31765031	-	2	97	0.4731	0	2	19	78	0.47705	1506	>200	0
STAB2	NC_006088.4	54819376	54895220	-	2	97	0.4731	0	2	7	90	0.47705	1507	>200	0
ZAK	NC_006094.4	17413143	17496780	-	2	97	0.4731	0	2	20	77	0.47705	1508	>200	0
DYRK2	NC_006088.4	34898482	34912970	+	1	39	0.4766	0	1	11	28	0.4775	1509	>200	0
LOC418465	NC_006088.4	97942746	97966909	-	1	39	0.4766	0	1	0	39	0.4775	1510	>200	0
ITGA8	NC_006089.4	20364084	20465224	+	1	39	0.4766	1	0	15	24	0.4775	1511	>200	0
SLC30A8	NC_006089.4	135744328	135767500	+	1	39	0.4766	0	1	2	37	0.4775	1512	>200	0
ESR1	NC_006090.4	49136172	49309827	+	1	39	0.4766	0	1	9	30	0.4775	1513	>200	0
DDX1	NC_006090.4	99391118	99412379	+	1	39	0.4766	0	1	8	31	0.4775	1514	>200	0
DNAJC24	NC_006092.4	4997990	5029807	+	1	39	0.4766	0	1	0	39	0.4775	1515	>200	0
IMMP1L	NC_006092.4	5030988	5061789	-	1	39	0.4766	0	1	1	38	0.4775	1516	>200	0
CHID1	NC_006092.4	15148106	15273709	+	1	39	0.4766	0	1	6	33	0.4775	1517	94	2.73204
NUP155	NC_006127.4	11533587	11564855	-	1	39	0.4766	0	1	12	27	0.4775	1518	>200	0
MPDZ	NC_006127.4	30957187	31057367	-	1	39	0.4766	0	1	22	17	0.4775	1519	76	2.23272
EPHA5	NC_006091.4	51395111	51596984	-	3	157	0.4845	0	3	13	144	0.480677	1520	2	5.69476
TRAPPC9	NC_006089.4	145265136	145739944	-	2	98	0.4821	1	1	14	84	0.482399	1521	20	3.54285
CNR1	NC_006090.4	76446120	76464108	+	2	98	0.4821	0	2	12	86	0.482399	1522	1	7.83488
NXPH1	NC_006089.4	25115672	25278218	+	4	218	0.4794	0	4	7	211	0.485506	1523	2	5.81276
LOC101752017	NC_006088.4	30316307	30326233	-	1	40	0.481	0	1	0	40	0.486126	1524	>200	0
STS	NC_006088.4	126395736	126513898	-	1	40	0.481	0	1	6	34	0.486126	1525	>200	0
LOC771085	NC_006088.4	135664141	135745322	+	1	40	0.481	0	1	1	39	0.486126	1526	>200	0
KLF3	NC_006091.4	69976552	70003779	-	1	40	0.481	0	1	5	35	0.486126	1527	>200	0
NWD2	NC_006091.4	70366843	70416650	-	1	40	0.481	0	1	22	18	0.486126	1528	8	6.03448
C14ORF1	NC_006092.4	38371233	38372899	-	1	40	0.481	0	1	1	39	0.486126	1529	>200	0
LCOR	NC_006093.4	22429551	22485281	-	1	40	0.481	0	1	21	19	0.486126	1530	141	2.46063
TMEM174	NC_006127.4	24897252	24901748	-	1	40	0.481	0	1	0	40	0.486126	1531	>200	0
ZMYND11	NC_006089.4	9845712	9948581	+	2	99	0.4932	0	2	11	88	0.487713	1532	6	4.20461
C14ORF4	NC_006092.4	39059419	39062888	-	2	99	0.4932	0	2	1	98	0.487713	1533	>200	0
AFF2	NC_006091.4	18250798	18433604	-	6	339	0.4888	0	6	20	319	0.488252	1534	6	4.03622
ARHGAP42	NC_006088.4	183291270	183451831	-	2	100	0.4879	0	2	16	84	0.492993	1535	>200	0
UST	NC_006090.4	47945119	48107519	+	3	160	0.493	1	2	9	151	0.493155	1536	8	4.47161
KALRN	NC_006094.4	27566458	28012156	+	3	160	0.493	0	3	37	123	0.493155	1537	8	5.46981
PTPRC	NC_006095.4	2036695	2110362	-	3	160	0.493	0	3	7	153	0.493155	1538	>200	0
GPR37	NC_006088.4	21843141	21854971	+	1	41	0.4954	0	1	0	41	0.494609	1539	49	3.65256
BAI1	NC_006089.4	147680284	147963735	+	1	41	0.4954	0	1	3	38	0.494609	1540	>200	0
AGPAT5	NC_006090.4	88824455	88881205	-	1	41	0.4954	0	1	10	31	0.494609	1541	>200	0
GRXCR1	NC_006091.4	68477041	68514072	-	1	41	0.4954	0	1	1	40	0.494609	1542	>200	0
PTPN5	NC_006092.4	12662176	12768678	-	1	41	0.4954	0	1	9	32	0.494609	1543	5	5.2736
DDB2	NC_006092.4	23152841	23201779	-	1	41	0.4954	0	1	7	34	0.494609	1544	>200	0
IFT43	NC_006092.4	38519045	38563646	+	1	41	0.4954	0	1	1	40	0.494609	1545	>200	0
NRAP	NC_006093.4	27467950	27513826	-	1	41	0.4954	0	1	17	24	0.494609	1546	>200	0
ABCA4	NC_006095.4	13671512	13758994	+	1	41	0.4954	0	1	29	12	0.494609	1547	>200	0
CHL1	NC_006099.4	17238006	17346873	+	1	41	0.4954	0	1	2	39	0.494609	1548	2	6.00191
LOC416263	NC_006100.4	12296284	12306788	+	1	41	0.4954	0	1	0	41	0.494609	1549	>200	0
TANGO2	NC_006102.4	1268641	1286149	+	1	41	0.4954	0	1	3	38	0.494609	1550	188	2.42625
NLGN4X	NC_006088.4	126886532	127064472	+	2	101	0.4897	1	1	13	88	0.498239	1551	>200	0
AFF3	NC_006088.4	132704788	133045519	-	5	283	0.5014	0	5	23	260	0.501127	1552	47	2.9332
MSL3	NC_006088.4	123963432	123988388	-	1	42	0.5019	0	1	8	34	0.502952	1553	>200	0
PHLPP1	NC_006089.4	68240563	68371768	-	1	42	0.5019	0	1	12	30	0.502952	1554	60	2.91525
RASGRP3	NC_006090.4	31145546	31196714	-	1	42	0.5019	0	1	9	33	0.502952	1555	>200	0
GALNT2	NC_006090.4	40322903	40433307	+	1	42	0.5019	0	1	14	28	0.502952	1556	>200	0
SESTD1	NC_006094.4	15070525	15134202	+	1	42	0.5019	0	1	14	28	0.502952	1557	2	4.69536
CERS6	NC_006094.4	19034653	19155464	-	1	42	0.5019	0	1	7	35	0.502952	1558	175	2.24633
PRRC2B	NC_006104.4	6638001	6695341	+	1	42	0.5019	0	1	35	7	0.502952	1559	8	4.2456
PMAIP1	NC_006127.4	9445622	9446599	+	1	42	0.5019	0	1	0	42	0.502952	1560	>200	0
ANKRD55	NC_006127.4	17091886	17145084	-	1	42	0.5019	0	1	6	36	0.502952	1561	24	3.74141
PDE4D	NC_006127.4	18249855	18787778	-	1	42	0.5019	1	0	19	23	0.502952	1562	14	4.17506
LOC421108	NC_006089.4	108435017	108487597	+	4	223	0.5013	0	4	3	220	0.50306	1563	>200	0
JAZF1	NC_006089.4	33044774	33232951	-	2	102	0.5122	0	2	6	96	0.503449	1564	2	5.54996
CDH12	NC_006089.4	73398953	73617480	+	2	102	0.5122	0	2	14	88	0.503449	1565	5	5.71446
XPNPEP1	NC_006093.4	25696897	25726538	-	2	102	0.5122	0	2	10	92	0.503449	1566	>200	0
RUNX1T1	NC_006089.4	125593110	125702828	-	9	527	0.5085	0	9	14	513	0.504876	1567	7	3.99735
COX6C	NC_006089.4	128895036	128900741	-	3	163	0.5048	0	3	0	163	0.505481	1568	>200	0
LRFN2	NC_006090.4	28302607	28452666	+	2	103	0.5042	0	2	3	100	0.508625	1569	22	6.00724
GPR126	NC_006090.4	53017524	53127121	-	2	103	0.5042	0	2	14	89	0.508625	1570	>200	0
SIM1	NC_006090.4	71184135	71231201	+	3	164	0.4978	1	2	13	151	0.509554	1571	>200	0
RWDD3	NC_006095.4	13316634	13325969	-	3	164	0.4978	0	3	4	160	0.509554	1572	>200	0
SKAP2	NC_006089.4	32451247	32560233	-	4	225	0.5167	0	4	5	220	0.510007	1573	>200	0
KIAA1462	NC_006089.4	14905337	14962843	-	1	43	0.507	0	1	8	35	0.511157	1574	>200	0
SLC4A7	NC_006089.4	38581179	38714035	-	1	43	0.507	0	1	22	21	0.511157	1575	>200	0
KCNQ3	NC_006089.4	141515838	141706163	-	1	43	0.507	1	0	9	34	0.511157	1576	3	5.50708
FOSL2	NC_006090.4	27455227	27465411	-	1	43	0.507	0	1	2	41	0.511157	1577	>200	0
PARK2	NC_006090.4	44611000	45290198	+	1	43	0.507	0	1	4	39	0.511157	1578	>200	0
RBM20	NC_006093.4	26053215	26146948	+	1	43	0.507	0	1	20	23	0.511157	1579	>200	0
LEPREL1	NC_006096.4	14031223	14090947	+	1	43	0.507	0	1	4	39	0.511157	1580	>200	0
TXNRD2	NC_006102.4	1004287	1038241	-	1	43	0.507	0	1	4	39	0.511157	1581	>200	0
AJAP1	NC_006108.4	786535	825270	-	1	43	0.507	0	1	6	37	0.511157	1582	3	5.78104
SNAI2	NC_006089.4	108767245	108770802	-	4	226	0.5075	0	4	4	222	0.513464	1583	>200	0
EPAS1	NC_006090.4	26625940	26703017	+	2	104	0.5165	0	2	14	90	0.513764	1584	>200	0
CUEDC2	NC_006093.4	16983558	16994615	-	2	104	0.5165	0	2	3	101	0.513764	1585	>200	0
LOC101748457	NC_006088.4	115502585	115510376	-	2	105	0.5149	0	2	0	105	0.518869	1586	>200	0
ROBO2	NC_006088.4	96887947	97810812	-	6	350	0.5121	0	6	28	322	0.519016	1587	10	4.41329
LOC101748311	NC_006088.4	169986673	169994491	-	1	44	0.5143	0	1	2	42	0.519227	1588	>200	0
BMI1	NC_006089.4	17748915	17762554	-	1	44	0.5143	0	1	9	35	0.519227	1589	>200	0
STEAP1	NC_006089.4	21669269	21679233	+	1	44	0.5143	0	1	4	40	0.519227	1590	>200	0
SOGA2	NC_006089.4	98980382	99078651	-	1	44	0.5143	0	1	8	36	0.519227	1591	>200	0
OGFRL1	NC_006090.4	82683517	82698883	+	1	44	0.5143	0	1	6	38	0.519227	1592	11	5.16573
GABRA2	NC_006091.4	67487682	67549247	+	1	44	0.5143	0	1	14	30	0.519227	1593	4	5.35555
ATP8A1	NC_006091.4	68572806	68666979	+	1	44	0.5143	0	1	30	14	0.519227	1594	7	4.26158
GLRX5	NC_006092.4	46145047	46151387	+	1	44	0.5143	0	1	3	41	0.519227	1595	>200	0
LOC101749230	NC_006092.4	46347052	46376165	+	1	44	0.5143	0	1	2	42	0.519227	1596	>200	0
PPP1R1C	NC_006094.4	14158998	14200345	-	1	44	0.5143	0	1	0	44	0.519227	1597	96	2.91703
RYBP	NC_006099.4	16428765	16463589	-	1	44	0.5143	0	1	5	39	0.519227	1598	>200	0
FGF18	NC_006100.4	3197247	3262917	-	1	44	0.5143	0	1	2	42	0.519227	1599	>200	0
DACH1	NC_006088.4	156675373	157044066	+	9	535	0.5324	0	9	14	521	0.522845	1600	>200	0
BBX	NC_006088.4	87225428	87369438	+	2	106	0.5228	0	2	16	90	0.523937	1601	>200	0
AHR	NC_006089.4	28818151	28878615	+	2	106	0.5228	0	2	13	93	0.523937	1602	>200	0
TBC1D5	NC_006089.4	34720397	35027486	-	7	414	0.5304	1	6	17	397	0.526319	1603	>200	0
C1QL3	NC_006089.4	20148373	20155210	+	1	45	0.527	0	1	5	40	0.527164	1604	6	5.16062
LYPLA1	NC_006089.4	110710446	110721490	-	1	45	0.527	0	1	2	43	0.527164	1605	>200	0
SOX17	NC_006089.4	110860250	110861915	+	1	45	0.527	0	1	0	45	0.527164	1606	>200	0
NHSL1	NC_006090.4	54374441	54540617	+	1	45	0.527	0	1	13	32	0.527164	1607	>200	0
SNTG2	NC_006090.4	92952262	93110733	+	1	45	0.527	0	1	11	34	0.527164	1608	>200	0
INTS9	NC_006090.4	106484526	106552340	-	1	45	0.527	0	1	7	38	0.527164	1609	>200	0
KCNIP4	NC_006091.4	75415551	75452371	+	1	45	0.527	0	1	4	41	0.527164	1610	4	5.23481
PLCE1	NC_006093.4	20106897	20254084	-	1	45	0.527	0	1	21	24	0.527164	1611	>200	0
SDPR	NC_006094.4	8201378	8213199	-	1	45	0.527	0	1	1	44	0.527164	1612	>200	0
COL27A1	NC_006104.4	5197415	5325068	+	1	45	0.527	0	1	11	34	0.527164	1613	>200	0
MGAT4C	NC_006113.4	905080	910862	-	1	45	0.527	0	1	7	38	0.527164	1614	1	5.63322
THSD7A	NC_006089.4	26313192	26583008	-	2	107	0.5257	1	1	24	83	0.528968	1615	15	3.73702
CRIM1	NC_006090.4	32364400	32528074	-	3	169	0.5333	0	3	9	160	0.529653	1616	105	2.32917
ZPLD1	NC_006088.4	85462740	85586538	+	4	231	0.541	0	4	8	223	0.530577	1617	>200	0
C12H3ORF67	NC_006099.4	11911136	11974663	-	6	355	0.531	0	6	5	350	0.532759	1618	>200	0
MIPOL1	NC_006092.4	37013891	37193639	+	2	108	0.5276	0	2	10	98	0.533964	1619	>200	0
VTG1	NC_006095.4	18694448	18737086	+	2	108	0.5276	0	2	11	97	0.533964	1620	>200	0
FGF12	NC_006096.4	13369310	13558599	+	2	108	0.5276	0	2	6	102	0.533964	1621	8	5.2494
GNAI1	NC_006088.4	11368548	11403764	-	1	46	0.5246	0	1	2	44	0.53497	1622	7	4.51977
IPO5	NC_006088.4	145123379	145161548	-	1	46	0.5246	0	1	14	32	0.53497	1623	>200	0
TMEM108	NC_006089.4	42599999	42759396	+	1	46	0.5246	0	1	9	37	0.53497	1624	33	3.71568
TPK1	NC_006089.4	52858574	53196804	-	1	46	0.5246	0	1	3	43	0.53497	1625	>200	0
LRRC30	NC_006089.4	99722310	99725236	-	1	46	0.5246	0	1	1	45	0.53497	1626	>200	0
TASP1	NC_006090.4	12614626	12688460	+	1	46	0.5246	1	0	15	31	0.53497	1627	>200	0
RBKS	NC_006090.4	27649944	27715040	+	1	46	0.5246	0	1	6	40	0.53497	1628	>200	0
LOC107049185	NC_006090.4	34032646	34081009	+	1	46	0.5246	0	1	0	46	0.53497	1629	>200	0
RASL11B	NC_006091.4	66369830	66373534	-	1	46	0.5246	0	1	3	43	0.53497	1630	4	4.49258
GNPDA2	NC_006091.4	68018311	68025939	+	1	46	0.5246	0	1	7	39	0.53497	1631	>200	0
TBC1D1	NC_006091.4	70141759	70246768	-	1	46	0.5246	0	1	15	31	0.53497	1632	>200	0
TRMT5	NC_006092.4	54341091	54346543	+	1	46	0.5246	0	1	0	46	0.53497	1633	>200	0
LOC423919	NC_006093.4	29007991	29063810	-	1	46	0.5246	0	1	8	38	0.53497	1634	>200	0
DNAJC10	NC_006094.4	13929733	13950191	-	1	46	0.5246	0	1	8	38	0.53497	1635	>200	0
THSD4	NC_006097.4	6421297	6529394	+	1	46	0.5246	0	1	7	39	0.53497	1636	>200	0
LOC107054538	NC_006100.4	14704215	14709259	+	1	46	0.5246	0	1	1	45	0.53497	1637	>200	0
AUH	NC_006127.4	44207209	44317563	-	1	46	0.5246	0	1	5	41	0.53497	1638	>200	0
DFFA	NC_006108.4	3732198	3735824	-	3	171	0.5395	0	3	0	171	0.537562	1639	>200	0
PROX1	NC_006090.4	21309365	21357222	-	6	357	0.538	0	6	17	340	0.53821	1640	>200	0
LDLRAD4	NC_006089.4	96842187	97118544	-	2	109	0.5271	0	2	12	97	0.538923	1641	36	2.58737
PTHLH	NC_006088.4	72518721	72531816	-	1	47	0.5353	0	1	2	45	0.542647	1642	90	3.1784
ST3GAL6	NC_006088.4	84200327	84252644	+	1	47	0.5353	0	1	5	42	0.542647	1643	>200	0
FAM188A	NC_006089.4	20311047	20358170	+	1	47	0.5353	0	1	7	40	0.542647	1644	103	2.55785
GLCCI1	NC_006089.4	24919647	24972172	+	1	47	0.5353	0	1	11	36	0.542647	1645	>200	0
ICA1	NC_006089.4	24980604	25053133	-	1	47	0.5353	0	1	6	41	0.542647	1646	44	3.09933
GREB1L	NC_006089.4	102578119	102705557	+	1	47	0.5353	0	1	19	28	0.542647	1647	>200	0
MSRA	NC_006090.4	106883003	107143723	+	1	47	0.5353	0	1	2	45	0.542647	1648	>200	0
FIP1L1	NC_006091.4	66133445	66171020	-	1	47	0.5353	0	1	9	38	0.542647	1649	>200	0
MPPED2	NC_006092.4	4579313	4682284	-	1	47	0.5353	0	1	1	46	0.542647	1650	3	4.36781
OMA1	NC_006095.4	26385791	26403680	-	1	47	0.5353	0	1	5	42	0.542647	1651	>200	0
FBXW11	NC_006100.4	2822064	2888103	+	1	47	0.5353	0	1	6	41	0.542647	1652	129	2.42005
TLX3	NC_006100.4	3302855	3305860	-	1	47	0.5353	0	1	2	45	0.542647	1653	>200	0
LOC101748308	NC_006127.4	32236567	32239246	+	1	47	0.5353	0	1	0	47	0.542647	1654	>200	0
CDH2	NC_006089.4	105084273	105197912	-	6	359	0.5435	0	6	12	347	0.543634	1655	39	2.84885
PKDCCa	NC_006090.4	23381879	23416028	+	4	235	0.546	0	4	5	230	0.544049	1656	>200	0
WWC2	NC_006091.4	40160051	40247993	-	3	173	0.5497	0	3	14	159	0.545395	1657	>200	0
STIM2	NC_006091.4	73554049	73619282	-	3	173	0.5497	0	3	17	156	0.545395	1658	27	3.51865
VPS13B	NC_006089.4	128544210	128892275	+	3	174	0.5507	1	2	34	140	0.549282	1659	>200	0
LOC107051973	NC_006088.4	135060547	135065170	-	1	48	0.5416	0	1	1	47	0.550197	1660	>200	0
NCK2	NC_006088.4	135367141	135448935	+	1	48	0.5416	0	1	5	43	0.550197	1661	>200	0
ANKH	NC_006089.4	76382006	76473528	+	1	48	0.5416	0	1	11	37	0.550197	1662	>200	0
DSEL	NC_006089.4	94974755	94981794	+	1	48	0.5416	0	1	14	34	0.550197	1663	>200	0
TMEM74	NC_006089.4	132472805	132479446	-	1	48	0.5416	0	1	4	44	0.550197	1664	8	4.74879
GPHN	NC_006092.4	29066540	29333342	-	1	48	0.5416	0	1	20	28	0.550197	1665	35	3.23377
TTC7B	NC_006092.4	44037410	44157552	-	1	48	0.5416	0	1	13	35	0.550197	1666	12	4.49794
SIX4	NC_006092.4	54464652	54475794	+	1	48	0.5416	0	1	13	35	0.550197	1667	>200	0
CDH7	NC_006089.4	95819538	95897002	-	3	175	0.5571	0	3	10	165	0.553149	1668	2	5.57383
TRIM66	NC_006092.4	9735298	9780074	+	3	175	0.5571	0	3	4	171	0.553149	1669	14	4.54892
PAX9	NC_006092.4	36761995	36780257	+	2	112	0.5486	0	2	1	111	0.553579	1670	>200	0
DICER1	NC_006092.4	45907275	45943106	-	2	112	0.5486	0	2	26	86	0.553579	1671	>200	0
IMPAD1	NC_006089.4	111937466	111959628	-	1	49	0.558	0	1	3	46	0.557623	1672	61	2.75521
TAB2	NC_006090.4	48165216	48238627	+	1	49	0.558	0	1	12	37	0.557623	1673	>200	0
PHF21A	NC_006092.4	23771468	23897323	+	1	49	0.558	0	1	13	36	0.557623	1674	>200	0
DUPD1	NC_006093.4	14955839	14975346	+	1	49	0.558	0	1	0	49	0.557623	1675	>200	0
PLXNB2	NC_006088.4	20488409	20739387	-	2	113	0.551	0	2	21	92	0.558391	1676	>200	0
PCBP2	NC_006089.4	85751030	85897208	+	2	113	0.551	0	2	18	95	0.558391	1677	>200	0
NRK	NC_006091.4	17270287	17367901	+	2	113	0.551	0	2	12	101	0.558391	1678	>200	0
ESRRG	NC_006090.4	20241793	20358377	+	6	365	0.5654	0	6	4	361	0.559731	1679	17	4.18984
SNX10	NC_006089.4	32275268	32308777	+	3	177	0.5601	0	3	4	173	0.560824	1680	100	2.8025
PSMD7	NC_006098.4	19316519	19321831	-	3	177	0.5601	0	3	1	176	0.560824	1681	>200	0
SEMA6D	NC_006097.4	9535589	9912577	+	5	304	0.5682	0	5	20	284	0.56419	1682	34	2.89535
LOC100857777	NC_006098.4	19944361	19949539	+	3	178	0.5614	0	3	0	178	0.564631	1683	>200	0
FAR2	NC_006088.4	72958403	73091761	+	1	50	0.5608	0	1	4	46	0.564926	1684	3	5.28894
GLRA2	NC_006088.4	122391008	122517085	-	1	50	0.5608	0	1	11	39	0.564926	1685	3	5.91595
LMO7	NC_006088.4	154867525	154996496	-	1	50	0.5608	0	1	21	29	0.564926	1686	>200	0
PTER	NC_006089.4	20155342	20175199	-	1	50	0.5608	0	1	3	47	0.564926	1687	>200	0
HOXA1	NC_006089.4	32633748	32636067	-	1	50	0.5608	0	1	3	47	0.564926	1688	>200	0
NR1D2	NC_006089.4	37343012	37370894	+	1	50	0.5608	0	1	9	41	0.564926	1689	>200	0
LOC770839	NC_006089.4	82056983	82061587	-	1	50	0.5608	0	1	0	50	0.564926	1690	>200	0
PTPN14	NC_006090.4	21088458	21198115	+	1	50	0.5608	0	1	11	39	0.564926	1691	>200	0
BRE	NC_006090.4	27485384	27650357	-	1	50	0.5608	0	1	9	41	0.564926	1692	>200	0
LOC422249	NC_006091.4	4452474	4479553	+	1	50	0.5608	0	1	12	38	0.564926	1693	>200	0
PPM1K	NC_006091.4	47314981	47333127	-	1	50	0.5608	0	1	2	48	0.564926	1694	58	2.97914
MICU3	NC_006091.4	63626249	63679404	-	1	50	0.5608	0	1	6	44	0.564926	1695	2	5.23041
BMF	NC_006092.4	29410452	29434092	+	1	50	0.5608	0	1	12	38	0.564926	1696	>200	0
SPTSSA	NC_006092.4	35938723	35942401	-	1	50	0.5608	0	1	2	48	0.564926	1697	>200	0
CALM1	NC_006092.4	43916891	43927634	+	1	50	0.5608	0	1	11	39	0.564926	1698	3	5.45644
CAMK2G	NC_006093.4	15570732	15682802	+	1	50	0.5608	0	1	19	31	0.564926	1699	11	4.69578
B3GALT1	NC_006094.4	19281846	19463712	-	1	50	0.5608	0	1	8	42	0.564926	1700	6	4.78075
SENP5	NC_006096.4	16110266	16129893	-	1	50	0.5608	0	1	13	37	0.564926	1701	>200	0
LOC415780	NC_006098.4	10874272	11006480	-	1	50	0.5608	0	1	5	45	0.564926	1702	>200	0
WWC1	NC_006100.4	4752416	4816036	-	3	179	0.5749	0	3	8	171	0.568418	1703	>200	0
HNRNPA3	NC_006094.4	15887443	15905229	-	4	243	0.5724	0	4	10	233	0.570378	1704	>200	0
FBXO7	NC_006088.4	53278103	53291713	-	1	51	0.578	0	1	7	44	0.572109	1705	139	2.8366
SLCO5A1	NC_006089.4	116779608	116852121	-	1	51	0.578	0	1	9	42	0.572109	1706	>200	0
KCNH1	NC_006090.4	22357088	22528162	+	1	51	0.578	0	1	7	44	0.572109	1707	8	5.4001
TMEM18	NC_006090.4	92508745	92513432	-	1	51	0.578	0	1	0	51	0.572109	1708	199	2.23202
LRP4	NC_006092.4	23308716	23388804	+	1	51	0.578	0	1	28	23	0.572109	1709	20	4.06294
SIPA1L1	NC_006092.4	26955914	27146307	-	1	51	0.578	0	1	15	36	0.572109	1710	6	5.40749
GREM1	NC_006092.4	30579487	30586347	-	1	51	0.578	0	1	0	51	0.572109	1711	>200	0
MAPK8	NC_006093.4	18176628	18280094	+	1	51	0.578	0	1	10	41	0.572109	1712	3	5.21549
LOC771515	NC_006094.4	31653324	31657910	-	1	51	0.578	0	1	0	51	0.572109	1713	>200	0
PAX3	NC_006096.4	7888047	7947648	-	1	51	0.578	0	1	3	48	0.572109	1714	>200	0
CCDC171	NC_006127.4	31978661	32232006	+	1	51	0.578	0	1	4	47	0.572109	1715	>200	0
VASH1	NC_006092.4	38908465	38922371	+	2	116	0.5624	0	2	7	109	0.572602	1716	12	4.11828
PAX2	NC_006093.4	17096498	17188067	-	2	116	0.5624	0	2	13	103	0.572602	1717	>200	0
CDC5L	NC_006090.4	109327138	109358894	+	3	181	0.5784	0	3	12	169	0.57593	1718	>200	0
SLC24A5	NC_006097.4	10039455	10047425	+	4	245	0.5803	0	4	6	239	0.576825	1719	>200	0
EVX1	NC_006089.4	32772103	32775907	+	2	117	0.5797	0	2	3	114	0.577264	1720	>200	0
GLTSCR1L	NC_006090.4	23117202	23151506	+	2	117	0.5797	0	2	15	102	0.577264	1721	18	4.25365
PARD3B	NC_006094.4	12814715	13182738	-	5	309	0.5808	0	5	15	294	0.578599	1722	>200	0
PDCL3	NC_006088.4	133215687	133221351	+	1	52	0.5744	0	1	1	51	0.579173	1723	>200	0
TTC27	NC_006090.4	31444898	31547243	-	1	52	0.5744	0	1	10	42	0.579173	1724	>200	0
PDGFC	NC_006091.4	21350186	21465994	+	1	52	0.5744	0	1	4	48	0.579173	1725	>200	0
CNNM1	NC_006093.4	22136442	22149668	-	1	52	0.5744	0	1	2	50	0.579173	1726	6	5.47685
HPS1	NC_006093.4	22234755	22239490	+	1	52	0.5744	0	1	1	51	0.579173	1727	>200	0
ADRA2A	NC_006093.4	26252178	26255673	+	1	52	0.5744	0	1	2	50	0.579173	1728	>200	0
SCN3A	NC_006094.4	19992140	20064902	+	1	52	0.5744	0	1	31	21	0.579173	1729	3	5.27217
UQCRFS1	NC_006098.4	8237376	8240729	-	1	52	0.5744	0	1	0	52	0.579173	1730	>200	0
ANGEL2	NC_006090.4	21756490	21768768	+	4	246	0.5758	0	4	6	240	0.580029	1731	>200	0
PTPRF	NC_006095.4	19880682	20222936	+	4	246	0.5758	0	4	26	220	0.580029	1732	>200	0
LOC421081	NC_006089.4	103800278	103802564	+	5	310	0.575	0	5	0	310	0.581451	1733	>200	0
USP9X	NC_006088.4	112078329	112176727	-	1	53	0.5814	0	1	41	12	0.58612	1734	>200	0
TRPA1	NC_006089.4	117713613	117748514	-	1	53	0.5814	0	1	15	38	0.58612	1735	>200	0
GBF1	NC_006093.4	16829793	16928237	+	1	53	0.5814	0	1	18	35	0.58612	1736	>200	0
LOC100859897	NC_006088.4	163983202	163983832	+	2	119	0.5828	0	2	0	119	0.586477	1737	>200	0
MTPAP	NC_006089.4	14992906	15014991	-	2	119	0.5828	0	2	4	115	0.586477	1738	>200	0
BAMBI	NC_006089.4	15317843	15321681	-	2	119	0.5828	0	2	2	117	0.586477	1739	>200	0
RREB1	NC_006089.4	64856094	64985844	-	2	119	0.5828	0	2	13	106	0.586477	1740	>200	0
XKR9	NC_006089.4	117195156	117205648	+	2	119	0.5828	0	2	0	119	0.586477	1741	>200	0
FZD8	NC_006089.4	12831346	12834071	+	5	313	0.5861	0	5	1	312	0.589942	1742	>200	0
LOC427656	NC_006101.4	1801745	1804197	+	2	120	0.5967	0	2	2	118	0.591027	1743	>200	0
CHST11	NC_006088.4	54433922	54593321	-	1	54	0.5831	0	1	7	47	0.592953	1744	>200	0
OCA2	NC_006088.4	130666248	130847586	+	1	54	0.5831	0	1	9	45	0.592953	1745	>200	0
ENPP2	NC_006089.4	136612721	136682502	-	1	54	0.5831	0	1	16	38	0.592953	1746	>200	0
GDF10	NC_006093.4	18017946	18032734	-	1	54	0.5831	0	1	9	45	0.592953	1747	46	2.9732
OLFM3	NC_006095.4	11447650	11502318	+	1	54	0.5831	0	1	6	48	0.592953	1748	1	5.77505
FANCC	NC_006127.4	41661008	41749138	-	1	54	0.5831	0	1	3	51	0.592953	1749	>200	0
LOC107053116	NC_006090.4	71974116	71975316	-	6	378	0.5937	0	6	0	378	0.593651	1750	>200	0
RPGRIP1L	NC_006098.4	4974841	5038554	+	3	186	0.5948	0	3	2	184	0.594348	1751	11	3.78512
TPGS2	NC_006127.4	7103001	7126998	+	8	505	0.5858	0	8	3	502	0.594445	1752	17	3.582
MYO16	NC_006088.4	138028208	138394995	+	2	121	0.5956	1	1	26	95	0.595539	1753	4	5.75969
CDH10	NC_006089.4	72373150	72468883	+	2	121	0.5956	0	2	7	114	0.595539	1754	8	4.51356
RYR2	NC_006090.4	37305242	37666395	-	2	121	0.5956	0	2	71	50	0.595539	1755	>200	0
CNTNAP5	NC_006094.4	24536859	24815016	-	5	315	0.5902	0	5	12	303	0.59555	1756	15	4.09888
PPP1R12A	NC_006088.4	39561135	39685680	-	1	55	0.6037	0	1	26	29	0.599673	1757	>200	0
ETV6	NC_006088.4	71540708	71673794	+	1	55	0.6037	0	1	4	51	0.599673	1758	>200	0
MAPRE2	NC_006089.4	107899247	107991463	+	1	55	0.6037	0	1	9	46	0.599673	1759	7	4.89517
PI15	NC_006089.4	118812721	118835083	+	1	55	0.6037	0	1	3	52	0.599673	1760	>200	0
FMN1	NC_006092.4	30437720	30556612	+	1	55	0.6037	0	1	14	41	0.599673	1761	>200	0
RP11-574K11.31	NC_006093.4	15686968	15815306	+	1	55	0.6037	0	1	12	43	0.599673	1762	>200	0
ZNF385B	NC_006094.4	14877684	15028997	+	1	55	0.6037	0	1	10	45	0.599673	1763	16	3.91034
PIGC	NC_006095.4	4536840	4538746	+	1	55	0.6037	0	1	0	55	0.599673	1764	>200	0
MOCOS	NC_006089.4	85056316	85284733	-	2	122	0.5944	0	2	11	111	0.600014	1765	>200	0
CBLB	NC_006088.4	86643706	86770183	-	2	123	0.6071	0	2	15	108	0.604452	1766	>200	0
NFATC1	NC_006089.4	56744150	56867913	-	2	123	0.6071	0	2	13	110	0.604452	1767	>200	0
ALCAM	NC_006088.4	86503359	86619331	+	4	254	0.6021	0	4	11	243	0.605143	1768	5	4.07349
TRIM32	NC_006104.4	3815719	3822748	+	3	189	0.6021	0	3	4	185	0.605146	1769	4	5.61366
SETBP1	NC_006127.4	2626279	2897599	-	3	189	0.6021	0	3	16	173	0.605146	1770	36	3.14159
ARID2	NC_006088.4	30749892	30857508	+	1	56	0.6066	0	1	24	32	0.606282	1771	>200	0
PTPRB	NC_006088.4	35841486	35907487	-	1	56	0.6066	0	1	27	29	0.606282	1772	>200	0
UBR5	NC_006089.4	129707245	129786855	-	1	56	0.6066	0	1	54	2	0.606282	1773	>200	0
MTSS1	NC_006089.4	138603230	138721685	-	1	56	0.6066	0	1	12	44	0.606282	1774	107	3.13141
LOC416086	NC_006099.4	14658225	14682233	+	1	56	0.6066	0	1	1	55	0.606282	1775	>200	0
C3ORF30	NC_006088.4	80801074	80804289	-	8	511	0.6036	0	8	0	511	0.607615	1776	>200	0
FAT1	NC_006091.4	62099614	62202082	-	3	190	0.6101	0	3	43	147	0.608702	1777	>200	0
NOVA1	NC_006092.4	32816699	32999325	-	3	190	0.6101	0	3	2	188	0.608702	1778	2	5.37799
PAXIP1	NC_006089.4	7693502	7728077	-	2	124	0.6078	0	2	13	111	0.608852	1779	>200	0
MOCS1	NC_006090.4	28773084	28803915	+	2	124	0.6078	0	2	6	118	0.608852	1780	>200	0
MCHR2	NC_006101.4	14406783	14415076	-	2	124	0.6078	0	2	0	124	0.608852	1781	40	3.15908
PRKCQ	NC_006088.4	3663976	3718876	-	1	57	0.6159	0	1	5	52	0.612782	1782	>200	0
HBP1	NC_006088.4	14555679	14570948	+	1	57	0.6159	0	1	12	45	0.612782	1783	>200	0
PTPRR	NC_006088.4	35908157	36065249	-	1	57	0.6159	0	1	13	44	0.612782	1784	17	4.28252
RFX4	NC_006088.4	53762218	53853743	-	1	57	0.6159	0	1	13	44	0.612782	1785	122	2.70855
DCSTAMP	NC_006089.4	130550363	130559433	+	1	57	0.6159	0	1	2	55	0.612782	1786	>200	0
LOC769052	NC_006091.4	20396372	20443207	-	1	57	0.6159	0	1	6	51	0.612782	1787	>200	0
GRIA2	NC_006091.4	21570503	21667322	+	1	57	0.6159	0	1	21	36	0.612782	1788	3	5.40766
MAN2B2	NC_006091.4	80300632	80327604	+	1	57	0.6159	0	1	6	51	0.612782	1789	>200	0
TSPAN1	NC_006095.4	21558802	21562690	+	1	57	0.6159	0	1	0	57	0.612782	1790	>200	0
LOC107049119	NC_006100.4	14732854	14907462	-	1	57	0.6159	0	1	1	56	0.612782	1791	>200	0
CSF3R	NC_006110.4	4028094	4033661	+	1	57	0.6159	0	1	0	57	0.612782	1792	>200	0
MAP3K1	NC_006127.4	17405490	17463235	+	1	57	0.6159	0	1	20	37	0.612782	1793	>200	0
ROR2	NC_006127.4	44469527	44620288	-	1	57	0.6159	0	1	9	48	0.612782	1794	>200	0
ITPKA	NC_006092.4	24661760	24702169	+	2	125	0.613	0	2	6	119	0.613215	1795	3	5.75814
EMP1	NC_006088.4	48351489	48365693	+	2	126	0.6144	0	2	3	123	0.61754	1796	>200	0
COBL	NC_006089.4	81329446	81479629	-	2	126	0.6144	0	2	13	113	0.61754	1797	9	3.98174
USP24	NC_006095.4	25363196	25423296	-	2	126	0.6144	0	2	33	93	0.61754	1798	>200	0
TRABD2B	NC_006095.4	22270934	22537943	-	6	388	0.6265	0	6	7	381	0.618774	1799	>200	0
DGKI	NC_006088.4	57491601	57699350	+	1	58	0.6205	1	0	12	46	0.619175	1800	13	4.64717
EXOC6	NC_006093.4	20567936	20654472	-	1	58	0.6205	0	1	13	45	0.619175	1801	>200	0
PDZD2	NC_006127.4	9453126	9647554	-	1	58	0.6205	0	1	16	42	0.619175	1802	47	2.85428
AKAP2	NC_006127.4	65592555	65839631	+	1	58	0.6205	0	1	18	40	0.619175	1803	>200	0
PLXNA1	NC_006099.4	9901704	9999497	+	6	389	0.6175	0	6	17	372	0.621237	1804	>200	0
IMMP2L	NC_006088.4	27287244	27750490	+	1	59	0.6179	0	1	3	56	0.625462	1805	>200	0
LOC107057534	NC_006088.4	116008293	116017903	+	1	59	0.6179	0	1	0	59	0.625462	1806	>200	0
LOC428024	NC_006088.4	145532173	145533512	+	1	59	0.6179	0	1	0	59	0.625462	1807	>200	0
EMC2	NC_006089.4	132351010	132385978	+	1	59	0.6179	0	1	5	54	0.625462	1808	>200	0
SLC4A1AP	NC_006090.4	27857468	27873684	-	1	59	0.6179	0	1	3	56	0.625462	1809	>200	0
GALNT7	NC_006091.4	43509094	43578179	+	1	59	0.6179	0	1	8	51	0.625462	1810	>200	0
SPAG16	NC_006094.4	3801735	4151851	+	1	59	0.6179	0	1	0	59	0.625462	1811	>200	0
B3GALT2	NC_006095.4	3439466	3451659	+	1	59	0.6179	0	1	1	58	0.625462	1812	3	4.43493
PRTG	NC_006097.4	7810951	7903322	+	1	59	0.6179	1	0	22	37	0.625462	1813	>200	0
C10ORF10	NC_006100.4	13836306	13843506	+	1	59	0.6179	0	1	1	58	0.625462	1814	>200	0
RP11-195F19.29	NC_006127.4	8328450	8349156	+	1	59	0.6179	0	1	0	59	0.625462	1815	>200	0
MAST4	NC_006127.4	21008304	21296662	+	1	59	0.6179	0	1	25	34	0.625462	1816	>200	0
PAWR	NC_006088.4	39476452	39549684	-	2	128	0.6237	0	2	3	125	0.626078	1817	>200	0
ZNF385D	NC_006089.4	36392081	36792051	-	2	128	0.6237	1	1	13	115	0.626078	1818	28	3.17803
FEZF2	NC_006099.4	13157698	13169225	-	2	128	0.6237	0	2	7	121	0.626078	1819	6	5.1893
YTHDF3	NC_006089.4	114242516	114264426	+	3	196	0.6276	0	3	4	192	0.629587	1820	>200	0
RUNX2	NC_006090.4	109768999	109983601	+	3	196	0.6276	0	3	14	182	0.629587	1821	>200	0
CACNA2D3	NC_006099.4	7323433	7733789	+	3	196	0.6276	1	2	17	179	0.629587	1822	2	5.69316
PTPRQ	NC_006088.4	39878509	39981716	+	1	60	0.6213	0	1	30	30	0.631646	1823	>200	0
SGOL1	NC_006089.4	36028228	36036168	-	1	60	0.6213	0	1	0	60	0.631646	1824	>200	0
DTNA	NC_006089.4	107654193	107874865	+	1	60	0.6213	0	1	20	40	0.631646	1825	5	4.2653
LNX1	NC_006091.4	65990792	66133390	+	1	60	0.6213	0	1	6	54	0.631646	1826	2	4.70744
DTNBP1	NC_006089.4	61472919	61540854	-	2	130	0.635	0	2	6	124	0.634468	1827	>200	0
SFMBT2	NC_006088.4	3928641	4037992	-	1	61	0.6334	0	1	7	54	0.637727	1828	>200	0
GABRG3	NC_006088.4	131000994	131302759	-	1	61	0.6334	0	1	7	54	0.637727	1829	1	5.55758
MBNL2	NC_006088.4	145335208	145441952	-	1	61	0.6334	0	1	15	46	0.637727	1830	>200	0
FLT1	NC_006088.4	175837246	175938674	+	1	61	0.6334	0	1	13	48	0.637727	1831	>200	0
STT3B	NC_006089.4	40275866	40326563	+	1	61	0.6334	0	1	15	46	0.637727	1832	>200	0
WRNIP1	NC_006089.4	67853839	67879253	+	1	61	0.6334	0	1	3	58	0.637727	1833	>200	0
MYOM2	NC_006090.4	91089248	91163384	-	1	61	0.6334	0	1	13	48	0.637727	1834	>200	0
GPR125	NC_006091.4	74924100	74980663	+	1	61	0.6334	0	1	14	47	0.637727	1835	>200	0
GPC1	NC_006096.4	2684716	2847256	-	1	61	0.6334	0	1	1	60	0.637727	1836	>200	0
SRBD1	NC_006090.4	26149682	26272618	-	2	131	0.6402	0	2	9	122	0.638607	1837	>200	0
LRRC4C	NC_006092.4	20503908	20955628	-	2	131	0.6402	0	2	6	125	0.638607	1838	8	5.8944
FOXN3	NC_006092.4	43428311	43613450	-	2	131	0.6402	0	2	22	109	0.638607	1839	>200	0
GRID2	NC_006091.4	36614429	37313873	+	2	132	0.639	0	2	12	120	0.642709	1840	9	4.84652
SLC25A13	NC_006089.4	24156138	24250062	-	3	200	0.6399	0	3	15	185	0.643074	1841	>200	0
ALG12	NC_006088.4	18849378	18865169	-	1	62	0.6314	0	1	7	55	0.643708	1842	>200	0
HS6ST3	NC_006088.4	145564562	145856976	-	1	62	0.6314	0	1	3	59	0.643708	1843	6	5.64671
SLITRK1	NC_006088.4	151209848	151217902	+	1	62	0.6314	0	1	8	54	0.643708	1844	8	5.63365
STMND1	NC_006089.4	62083056	62092116	+	1	62	0.6314	0	1	0	62	0.643708	1845	>200	0
REV3L	NC_006090.4	66236715	66360667	+	1	62	0.6314	0	1	30	32	0.643708	1846	163	2.14078
GPR26	NC_006093.4	31761677	31776040	+	1	62	0.6314	0	1	0	62	0.643708	1847	5	5.82633
BCL2L14	NC_006088.4	71720546	71733042	+	1	63	0.6389	0	1	0	63	0.649591	1848	>200	0
NPAS2	NC_006088.4	133321944	133431024	+	1	63	0.6389	0	1	13	50	0.649591	1849	1	5.78766
NFIL3	NC_006127.4	44344648	44358564	-	1	63	0.6389	0	1	8	55	0.649591	1850	>200	0
TBC1D22A	NC_006088.4	16200255	16355410	+	2	135	0.6518	0	2	9	126	0.654794	1851	>200	0
COMTD1	NC_006093.4	14824230	14832721	+	2	135	0.6518	0	2	2	133	0.654794	1852	>200	0
FAM110B	NC_006089.4	112159721	112263187	+	1	64	0.6551	0	1	6	58	0.655376	1853	2	5.2613
TNFRSF11B	NC_006089.4	136408045	136425640	-	1	64	0.6551	0	1	7	57	0.655376	1854	>200	0
FMR1NB	NC_006091.4	18726507	18742920	-	1	64	0.6551	0	1	0	64	0.655376	1855	>200	0
SFRP2	NC_006091.4	20227180	20230823	-	1	64	0.6551	0	1	2	62	0.655376	1856	>200	0
SOHO-1	NC_006091.4	81976917	81979176	-	1	64	0.6551	0	1	0	64	0.655376	1857	>200	0
RP11-47I22.4	NC_006092.4	54123011	54228390	-	1	64	0.6551	0	1	1	63	0.655376	1858	>200	0
DNM3	NC_006095.4	4543917	4710106	-	1	64	0.6551	0	1	9	55	0.655376	1859	5	5.23122
HACE1	NC_006090.4	69217077	69261301	+	2	136	0.6565	0	2	13	123	0.658749	1860	26	3.15343
EPHA4	NC_006096.4	7626766	7841515	-	5	339	0.6557	0	5	13	326	0.659333	1861	2	5.44377
SOX2	NC_006096.4	16918090	16919272	-	5	339	0.6557	0	5	2	337	0.659333	1862	128	2.89559
OSR1	NC_006090.4	101471165	101479312	-	6	405	0.6582	0	6	5	400	0.659381	1863	>200	0
RPS6KA3	NC_006088.4	119730261	119800901	+	1	65	0.6576	0	1	15	50	0.661066	1864	>200	0
MRPS9	NC_006088.4	135127388	135159319	+	1	65	0.6576	0	1	4	61	0.661066	1865	>200	0
SPTLC3	NC_006090.4	12781107	12863072	-	1	65	0.6576	0	1	12	53	0.661066	1866	>200	0
CHRM3	NC_006090.4	36525270	36699043	-	1	65	0.6576	0	1	4	61	0.661066	1867	3	5.45043
DOPEY1	NC_006090.4	78212194	78274978	-	1	65	0.6576	0	1	33	32	0.661066	1868	8	3.69751
GIMD1	NC_006091.4	38670312	38676093	+	1	65	0.6576	0	1	0	65	0.661066	1869	>200	0
PCNX	NC_006092.4	27200363	27283368	-	1	65	0.6576	0	1	34	31	0.661066	1870	>200	0
MTFR1	NC_006089.4	115214176	115235527	+	3	206	0.6631	0	3	2	204	0.662647	1871	>200	0
AMY2A	NC_006095.4	46119	407031	-	2	137	0.6582	0	2	2	135	0.662667	1872	>200	0
FEZF1	NC_006088.4	22836968	22840171	+	1	66	0.6698	0	1	4	62	0.666662	1873	>200	0
ARFGEF3	NC_006090.4	54564986	54650855	-	1	66	0.6698	0	1	32	34	0.666662	1874	5	4.5834
TUSC3	NC_006091.4	64033619	64145485	-	1	66	0.6698	0	1	4	62	0.666662	1875	6	4.7829
BUB3	NC_006093.4	31536672	31548253	+	1	66	0.6698	0	1	2	64	0.666662	1876	>200	0
COMMD10	NC_006127.4	72658118	72825373	-	1	66	0.6698	0	1	14	52	0.666662	1877	>200	0
ESRRB	NC_006092.4	38674192	38799612	+	2	139	0.6669	0	2	7	132	0.670396	1878	>200	0
FAM49B	NC_006089.4	140575887	140672742	-	3	209	0.67	0	3	7	202	0.672137	1879	>200	0
PRKX	NC_006088.4	128155837	128211093	+	1	67	0.6657	0	1	8	59	0.672165	1880	>200	0
PAX6	NC_006092.4	5201934	5218828	-	1	67	0.6657	0	1	6	61	0.672165	1881	>200	0
MID1IP1	NC_006088.4	112738605	112739753	-	2	140	0.6742	0	2	1	139	0.674206	1882	>200	0
PTPRM	NC_006089.4	99158316	99619810	-	3	210	0.6713	1	2	28	182	0.675256	1883	129	2.29352
LHFP	NC_006088.4	170958590	171098124	+	1	68	0.6713	0	1	4	64	0.677578	1884	90	2.69913
MYO3A	NC_006089.4	16303694	16407890	-	1	68	0.6713	0	1	25	43	0.677578	1885	>200	0
HHAT	NC_006090.4	22556416	22703705	-	1	68	0.6713	0	1	3	65	0.677578	1886	>200	0
CCDC167	NC_006090.4	30233535	30241892	+	1	68	0.6713	0	1	1	67	0.677578	1887	>200	0
FMN2	NC_006090.4	36312526	36410209	-	1	68	0.6713	0	1	9	59	0.677578	1888	5	4.77815
CPZ	NC_006091.4	81756785	81791318	+	1	68	0.6713	0	1	4	64	0.677578	1889	>200	0
AP5M1	NC_006092.4	55699098	55709323	-	1	68	0.6713	0	1	0	68	0.677578	1890	>200	0
PAIP1	NC_006127.4	13724220	13744206	-	1	68	0.6713	0	1	6	62	0.677578	1891	123	2.7876
ABCC4	NC_006088.4	146127039	146275424	+	2	141	0.6836	0	2	19	122	0.67798	1892	>200	0
LPIN1	NC_006090.4	97851761	97923292	+	2	141	0.6836	0	2	14	127	0.67798	1893	>200	0
ZNF503	NC_006093.4	14568425	14572649	+	2	141	0.6836	0	2	1	140	0.67798	1894	>200	0
PKHD1	NC_006090.4	108087010	108305107	+	3	211	0.6832	0	3	4	207	0.678353	1895	>200	0
LOC107052670	NC_006089.4	87678793	87680282	-	4	280	0.6778	0	4	0	280	0.68013	1896	>200	0
SOX21	NC_006088.4	146418582	146420739	+	2	142	0.6743	0	2	3	139	0.681718	1897	>200	0
SEL1L	NC_006092.4	40983624	41014345	-	2	142	0.6743	0	2	12	130	0.681718	1898	>200	0
CBLN2	NC_006089.4	92943104	92948715	+	1	69	0.6774	0	1	6	63	0.682901	1899	1	5.84648
KCNB2	NC_006089.4	117850572	118044414	+	1	69	0.6774	0	1	21	48	0.682901	1900	4	4.89262
ST3GAL1	NC_006089.4	142194524	142267911	-	1	69	0.6774	0	1	4	65	0.682901	1901	>200	0
MRPL33	NC_006090.4	27703214	27721536	-	1	69	0.6774	0	1	4	65	0.682901	1902	>200	0
KCNT2	NC_006095.4	2704796	2822005	+	1	69	0.6774	0	1	17	52	0.682901	1903	1	6.54375
RBM26	NC_006088.4	153111225	153159639	+	2	143	0.6892	0	2	14	129	0.68542	1904	>200	0
ABCE1	NC_006091.4	31263928	31277759	+	1	70	0.6857	0	1	9	61	0.688136	1905	>200	0
GRIK3	NC_006110.4	3867561	3940445	+	1	70	0.6857	0	1	3	67	0.688136	1906	6	5.60344
LOC107050476	NC_006088.4	141441887	141445903	-	2	144	0.6894	0	2	0	144	0.689087	1907	>200	0
DCT	NC_006088.4	146485483	146506241	+	2	144	0.6894	0	2	2	142	0.689087	1908	>200	0
RNF219	NC_006088.4	153499615	153526485	+	2	145	0.6942	0	2	7	138	0.692719	1909	>200	0
NRCAM	NC_006088.4	28579134	28721527	+	1	71	0.6963	0	1	35	36	0.693285	1910	5	5.32273
TNRC6B	NC_006088.4	50141099	50282098	-	1	71	0.6963	1	0	46	25	0.693285	1911	151	2.13088
ASAP1	NC_006089.4	140679136	140838476	-	1	71	0.6963	0	1	25	46	0.693285	1912	>200	0
ZIC3	NC_006091.4	4573967	4589223	+	1	71	0.6963	0	1	7	64	0.693285	1913	>200	0
VAV3	NC_006095.4	992063	1140083	-	1	71	0.6963	0	1	14	57	0.693285	1914	>200	0
BHLHE22	NC_006089.4	114781680	114783740	+	3	216	0.6902	0	3	2	214	0.693509	1915	5	5.75333
NRSN1	NC_006089.4	58140099	58147140	-	2	146	0.6926	0	2	5	141	0.696316	1916	6	5.68972
PROSER1	NC_006088.4	171237409	171258173	+	1	72	0.6987	0	1	12	60	0.698349	1917	>200	0
C5ORF22	NC_006089.4	69421442	69434436	-	1	72	0.6987	0	1	5	67	0.698349	1918	>200	0
CDH19	NC_006089.4	95537611	95554141	+	1	72	0.6987	0	1	3	69	0.698349	1919	>200	0
SNTB1	NC_006089.4	137075113	137183112	-	1	72	0.6987	0	1	4	68	0.698349	1920	>200	0
DKK2	NC_006091.4	38399615	38533901	+	1	72	0.6987	0	1	3	69	0.698349	1921	>200	0
RP11-505K9.4	NC_006098.4	16757889	16791497	-	1	72	0.6987	0	1	1	71	0.698349	1922	>200	0
ACPL2	NC_006096.4	6836838	6894412	+	4	287	0.6997	0	4	2	285	0.69852	1923	>200	0
DNAJC15	NC_006088.4	166719751	166744203	+	2	147	0.7031	0	2	0	147	0.699878	1924	>200	0
EXOC2	NC_006089.4	66749867	66962950	-	2	147	0.7031	0	2	15	132	0.699878	1925	>200	0
PRL	NC_006089.4	58772953	58779107	+	3	219	0.7042	0	3	4	215	0.70234	1926	57	4.69986
KDM4A	NC_006095.4	20225188	20249048	+	3	219	0.7042	0	3	14	205	0.70234	1927	>200	0
RFC3	NC_006088.4	173883997	173899963	-	1	73	0.695	0	1	6	67	0.70333	1928	>200	0
MBOAT1	NC_006089.4	59766693	59827400	+	1	73	0.695	0	1	9	64	0.70333	1929	>200	0
ERCC4	NC_006101.4	668674	681545	+	1	73	0.695	0	1	6	67	0.70333	1930	>200	0
SDK1	NC_006101.4	3529579	3889916	+	2	148	0.7025	0	2	12	136	0.703404	1931	148	2.18126
MMS22L	NC_006090.4	72689090	72777286	+	6	426	0.7032	0	6	3	423	0.70565	1932	>200	0
BCOR	NC_006088.4	112378844	112422324	+	2	149	0.7068	0	2	10	139	0.706897	1933	>200	0
PTN	NC_006088.4	57724423	57794404	+	1	74	0.7017	0	1	6	68	0.708228	1934	55	3.0834
CMC1	NC_006089.4	38923901	38967870	+	1	74	0.7017	0	1	0	74	0.708228	1935	>200	0
RPL34	NC_006091.4	37989118	37992417	-	1	74	0.7017	0	1	3	71	0.708228	1936	>200	0
COL11A1	NC_006095.4	11151567	11318749	+	1	74	0.7017	0	1	25	49	0.708228	1937	>200	0
LMX1B	NC_006104.4	10543138	10636808	+	1	74	0.7017	0	1	1	73	0.708228	1938	>200	0
LOC424300	NC_006094.4	31723864	31887843	-	2	150	0.7067	1	1	3	147	0.710355	1939	>200	0
PDGFA	NC_006101.4	1992390	2013345	-	2	150	0.7067	0	2	3	147	0.710355	1940	>200	0
METTL22	NC_006101.4	10160754	10192916	-	4	292	0.7002	0	4	3	289	0.711181	1941	>200	0
GADL1	NC_006089.4	40020796	40105339	-	1	75	0.7101	0	1	4	71	0.713045	1942	>200	0
LOC107050459	NC_006088.4	141041791	141048495	-	2	151	0.7015	0	2	4	147	0.713778	1943	>200	0
BMP4	NC_006092.4	58698093	58700930	-	2	151	0.7015	0	2	2	149	0.713778	1944	>200	0
AGBL1	NC_006097.4	13623118	13914436	-	3	223	0.7121	0	3	4	219	0.713811	1945	>200	0
SHH	NC_006089.4	8112415	8122027	-	3	224	0.709	0	3	2	222	0.716625	1946	>200	0
VWC2L	NC_006094.4	4151943	4191324	+	1	76	0.7226	0	1	5	71	0.717783	1947	2	5.49207
GP1BB	NC_006102.4	783758	784354	+	1	76	0.7226	0	1	0	76	0.717783	1948	10	5.01475
ZNF516	NC_006089.4	91084619	91186992	+	6	434	0.72	0	6	16	418	0.722106	1949	>200	0
GPC6	NC_006088.4	146513833	147264247	-	3	226	0.7219	0	3	19	207	0.722187	1950	>200	0
MAPK11	NC_006088.4	20405282	20435685	-	1	77	0.7126	0	1	3	74	0.722443	1951	9	4.76353
LOC107049103	NC_006099.4	1719262	1722354	-	1	77	0.7126	0	1	0	77	0.722443	1952	>200	0
METRNL	NC_006105.4	3124746	3145914	-	1	77	0.7126	0	1	4	73	0.722443	1953	>200	0
IL1RAPL1	NC_006088.4	116050200	116756487	-	1	78	0.7304	0	1	14	64	0.727026	1954	8	5.1985
MLL3	NC_006089.4	6576658	6764177	-	1	78	0.7304	1	0	36	42	0.727026	1955	>200	0
LOC428971	NC_006093.4	22817698	22825718	-	1	78	0.7304	0	1	2	76	0.727026	1956	>200	0
FHOD3	NC_006089.4	83341043	83710204	+	2	155	0.7265	0	2	18	137	0.727134	1957	>200	0
NSMAF	NC_006089.4	112422537	112461747	-	2	155	0.7265	0	2	7	148	0.727134	1958	>200	0
TSNARE1	NC_006089.4	147040839	147522127	-	2	155	0.7265	0	2	3	152	0.727134	1959	>200	0
NCKAP5	NC_006094.4	29936250	30299719	-	2	155	0.7265	1	1	15	140	0.727134	1960	145	2.3516
HHIP	NC_006091.4	31100900	31178103	+	2	156	0.7303	0	2	15	141	0.730389	1961	>200	0
BEND2	NC_006088.4	120911511	120937767	-	1	79	0.7266	0	1	1	78	0.731533	1962	>200	0
TBX20	NC_006089.4	47403388	47435573	+	1	79	0.7266	0	1	6	73	0.731533	1963	>200	0
BCKDHB	NC_006090.4	79329297	79439703	-	1	79	0.7266	0	1	6	73	0.731533	1964	>200	0
MAST2	NC_006095.4	21331467	21493742	+	1	79	0.7266	0	1	22	57	0.731533	1965	109	2.4629
ZMIZ1	NC_006093.4	12262236	12588127	-	3	230	0.7292	0	3	14	216	0.733057	1966	>200	0
TFAP2B	NC_006090.4	108683092	108715937	-	3	231	0.7351	0	3	13	218	0.735721	1967	>200	0
THOC2	NC_006091.4	15747428	15800442	+	1	80	0.7347	0	1	23	57	0.735966	1968	>200	0
FSHR	NC_006090.4	7457073	7534567	+	2	158	0.7292	0	2	1	157	0.7368	1969	>200	0
COLEC11	NC_006090.4	94108351	94145564	+	2	158	0.7292	0	2	3	155	0.7368	1970	>200	0
WDR37	NC_006089.4	10432035	10470433	+	2	159	0.7366	0	2	11	148	0.739957	1971	12	4.19621
PKIA	NC_006089.4	120755020	120759929	+	2	159	0.7366	0	2	1	158	0.739957	1972	8	5.02552
SLC26A7	NC_006089.4	125364238	125425542	+	2	159	0.7366	0	2	4	155	0.739957	1973	>200	0
PTP4A3	NC_006089.4	146359900	146404813	-	2	159	0.7366	0	2	3	156	0.739957	1974	>200	0
FRMPD4	NC_006088.4	123531145	123835572	-	1	81	0.7389	0	1	24	57	0.740325	1975	2	5.88128
ST6GAL2	NC_006088.4	135737783	135911966	-	1	81	0.7389	0	1	10	71	0.740325	1976	3	5.78052
GABBR2	NC_006089.4	88215743	88675541	+	1	81	0.7389	0	1	14	67	0.740325	1977	3	5.68683
ELP2	NC_006089.4	88712155	88744410	-	1	81	0.7389	0	1	6	75	0.740325	1978	>200	0
LOC107051807	NC_006091.4	30929206	30938186	-	1	81	0.7389	0	1	0	81	0.740325	1979	>200	0
DMXL2	NC_006097.4	9257966	9308197	-	1	81	0.7389	0	1	30	51	0.740325	1980	14	4.84981
LYSMD4	NC_006097.4	17092856	17108845	-	1	81	0.7389	0	1	1	80	0.740325	1981	8	4.46756
ARL4A	NC_006089.4	26855397	26858311	+	2	160	0.7444	0	2	6	154	0.743081	1982	>200	0
LMO1	NC_006092.4	10093183	10140880	+	3	234	0.7412	0	3	6	228	0.743587	1983	>200	0
PRMT9	NC_006091.4	32220882	32236517	-	1	82	0.7411	0	1	5	77	0.744613	1984	>200	0
SUCLG1	NC_006091.4	86749500	86764995	+	1	82	0.7411	0	1	2	80	0.744613	1985	>200	0
PPP1R3D	NC_006107.4	7055801	7061084	-	1	82	0.7411	0	1	1	81	0.744613	1986	>200	0
RASEF	NC_006127.4	39715756	39756520	-	1	82	0.7411	0	1	3	79	0.744613	1987	>200	0
SULT1E1	NC_006091.4	52140103	52142019	-	2	161	0.7468	0	2	0	161	0.746172	1988	>200	0
NTRK3	NC_006097.4	13227881	13408049	+	3	236	0.7455	0	3	9	227	0.748727	1989	1	5.59362
PTPRZ1	NC_006088.4	22901212	23034899	-	1	83	0.7473	0	1	34	49	0.748829	1990	21	4.1129
TIMP3	NC_006088.4	53145367	53177831	-	1	83	0.7473	0	1	2	81	0.748829	1991	>200	0
HIPK2	NC_006088.4	56075421	56198643	+	1	83	0.7473	0	1	8	75	0.748829	1992	27	3.32045
MMP2	NC_006098.4	3807839	3842546	-	1	83	0.7473	0	1	7	76	0.748829	1993	>200	0
ADAMTS2	NC_006100.4	13662874	13829650	+	1	83	0.7473	0	1	6	77	0.748829	1994	>200	0
TSHZ3	NC_006098.4	9353383	9415544	-	11	787	0.7514	0	11	4	783	0.750028	1995	11	4.08884
NRP2	NC_006094.4	12716002	12797161	-	3	237	0.7606	0	3	13	224	0.751265	1996	>200	0
ENOX1	NC_006088.4	166777051	167143017	-	2	163	0.7469	0	2	12	151	0.75226	1997	18	3.89092
ST18	NC_006089.4	109910068	109977941	-	2	163	0.7469	0	2	18	145	0.75226	1998	97	2.7512
CNKSR2	NC_006088.4	119170815	119377138	-	1	84	0.7469	0	1	21	63	0.752977	1999	1	5.69505
[truncated: 13,543 more rows]

## Sheet: Parrot Clade
Gene	Chromosome	Start	End	Strand	AR	CE	Q-score	Exonic AR	Noncoding AR	Exonic CE	Noncoding CE	Hypergeometric	Rank	ARCHS Vocalization Behavior Rank	ARCHS Vocalization Behavior Z-Score
GTDC1	NC_006094.4	33270007	33450697	-	65	599	0	0	65	17	582	0	1	54	2.97553
ARHGAP15	NC_006094.4	32874820	33193631	+	63	482	0	0	63	10	472	0	2	>200	0
ARRDC3	NC_006127.4	59332514	59346072	+	58	428	0	0	58	6	422	0	3	172	2.59514
NR2F1	NC_006127.4	58374141	58383484	-	57	410	0	0	57	2	408	0	4	1	5.831
SALL1	NC_006098.4	6046344	6061077	+	53	550	0	1	52	10	540	0	5	150	2.39515
TOX3	NC_006098.4	5324989	5446431	+	48	455	0	4	44	10	445	0	6	83	2.67928
MAT2B	NC_006100.4	6704768	6715540	-	47	248	0	0	47	4	244	0	7	>200	0
C12H3ORF67	NC_006099.4	11911136	11974663	-	41	398	0	0	41	4	394	0	8	>200	0
FHIT	NC_006099.4	12184099	12695580	-	40	414	0	0	40	1	413	0	9	>200	0
HAAO	NC_006090.4	24178252	24209583	-	36	247	0	0	36	1	246	0	10	>200	0
ZFP36L2	NC_006090.4	25044638	25048982	-	36	251	0	0	36	1	250	0	11	>200	0
NDST3	NC_006091.4	55377747	55489121	-	27	130	0	0	27	15	115	0	12	3	5.4356
NDST4	NC_006091.4	56456769	56569952	+	27	133	0	0	27	6	127	0	13	8	4.54283
ZEB2	NC_006094.4	33479454	33588073	-	44	802	0	0	44	12	790	1.9984e-14	14	>200	0
TDRD15	NC_006090.4	102733739	102742985	+	29	388	0	0	29	1	387	3.0187e-13	15	>200	0
SP4	NC_006089.4	30491092	30516966	+	17	121	0	1	16	12	109	1.09834e-12	16	30	3.40795
ACVR2A	NC_006094.4	34687035	34744468	+	35	595	0	0	35	4	591	1.24067e-12	17	13	4.12108
SOX2	NC_006096.4	16918090	16919272	-	27	356	0	0	27	2	354	1.38389e-12	18	128	2.89559
TENM2	NC_006100.4	4819802	5442558	-	32	504	0	0	32	33	471	1.51479e-12	19	3	5.55523
TSHZ3	NC_006098.4	9353383	9415544	-	42	868	0	1	41	6	862	4.45832e-12	20	11	4.08884
DACH1	NC_006088.4	156675373	157044066	+	32	536	0	0	32	16	520	7.58649e-12	21	>200	0
KLHL29	NC_006090.4	104033595	104436710	+	35	639	0	0	35	14	625	9.07552e-12	22	5	5.36146
TBL1XR1	NC_006096.4	17990380	18081131	+	24	306	0	0	24	20	286	1.17187e-11	23	>200	0
LOC107053591	NC_006092.4	47007100	47010020	+	44	975	0	0	44	0	975	1.36138e-11	24	>200	0
ZNF536	NC_006098.4	8766731	9093256	+	36	694	0	3	33	25	669	2.1301e-11	25	7	4.27701
KLHL1	NC_006088.4	157717622	157948054	+	26	372	0	0	26	9	363	2.20125e-11	26	13	5.58204
RAG2	NC_006092.4	19519715	19524759	-	11	47	0	0	11	2	45	3.33772e-11	27	>200	0
BCL11B	NC_006092.4	47863249	47955061	-	39	830	0	0	39	7	823	5.95562e-11	28	10	4.89336
FGF3	NC_006092.4	17620088	17625226	-	10	44	0	0	10	1	43	3.59569e-10	29	>200	0
NAALADL2	NC_006096.4	18399365	18686028	-	24	369	0	0	24	3	366	5.42578e-10	30	>200	0
LRP1B	NC_006094.4	32013509	32594568	-	20	263	0	2	18	56	207	1.00005e-09	31	7	4.93621
CDH8	NC_006098.4	12984407	13145886	+	32	653	0	0	32	15	638	1.07766e-09	32	2	5.23047
TPCN2	NC_006092.4	17116917	17139354	+	17	195	0	0	17	3	192	2.24737e-09	33	>200	0
MOCS1	NC_006090.4	28773084	28803915	+	14	126	0	0	14	6	120	2.50712e-09	34	>200	0
LOC101750420	NC_006089.4	30614227	30623656	+	8	28	0	0	8	0	28	2.90785e-09	35	>200	0
OSR1	NC_006090.4	101471165	101479312	-	24	415	0	0	24	5	410	5.45749e-09	36	>200	0
CCND1	NC_006092.4	17526264	17539488	+	17	212	0	0	17	4	208	7.94196e-09	37	>200	0
EN1	NC_006094.4	28670390	28673643	+	17	213	0	0	17	2	211	8.52102e-09	38	38	3.53116
INSIG2	NC_006094.4	28984337	28997158	-	17	233	0	0	17	7	226	3.21365e-08	39	>200	0
PCDH9	NC_006088.4	159096586	159805221	+	22	396	0	0	22	18	378	4.69098e-08	40	165	2.49727
LOC107051909	NC_006127.4	2278972	2562641	-	15	184	0	0	15	2	182	4.74719e-08	41	>200	0
HACE1	NC_006090.4	69217077	69261301	+	13	136	0	0	13	13	123	5.67872e-08	42	26	3.15343
SP8	NC_006089.4	30247258	30251331	-	12	116	0	0	12	3	113	7.60581e-08	43	90	3.07393
NT5C1B	NC_006090.4	101000666	101006629	-	17	248	0	0	17	1	247	7.95092e-08	44	>200	0
LRFN2	NC_006090.4	28302607	28452666	+	11	104	0	0	11	11	93	2.09913e-07	45	22	6.00724
ANO1	NC_006092.4	17726981	17803019	+	9	65	0	0	9	16	49	2.61024e-07	46	>200	0
SOX6	NC_006092.4	11108996	11253711	-	20	373	0.0001	0	20	26	347	3.28314e-07	47	34	3.00654
INSC	NC_006092.4	10595933	10678529	+	19	347	0	0	19	7	340	4.66506e-07	48	>200	0
DNAJC19	NC_006096.4	17135426	17139380	+	11	114	0	0	11	1	113	5.34773e-07	49	>200	0
CDYL2	NC_006098.4	15486814	15543551	+	11	118	0	1	10	17	101	7.56651e-07	50	>200	0
CDH11	NC_006098.4	12274830	12354154	+	20	410	0	0	20	20	390	1.41924e-06	51	>200	0
AP5M1	NC_006092.4	55699098	55709323	-	11	126	0	0	11	0	126	1.45468e-06	52	>200	0
PCDH17	NC_006088.4	163442841	163529605	-	18	344	0	0	18	21	323	1.75795e-06	53	9	3.96164
LOC107053286	NC_006091.4	72382562	72384222	-	11	131	0	0	11	0	131	2.13494e-06	54	>200	0
SLC14A2	NC_006127.4	2248955	2266538	-	9	83	0.0001	0	9	2	81	2.15392e-06	55	>200	0
KYNU	NC_006094.4	32805980	32863556	+	10	112	0	0	10	7	105	3.53979e-06	56	>200	0
GRAMD3	NC_006127.4	78952356	78994120	-	11	138	0	0	11	3	135	3.5492e-06	57	>200	0
HNF4G	NC_006089.4	119106351	119164146	+	17	327	0	0	17	8	319	3.66784e-06	58	>200	0
CDH6	NC_006089.4	69532903	69629567	-	15	260	0	0	15	12	248	3.8577e-06	59	78	2.91864
THADA	NC_006090.4	25050568	25202829	-	4	10	0.0003	4	0	6	4	6.80819e-06	60	>200	0
CDH7	NC_006089.4	95819538	95897002	-	12	180	0.0001	0	12	15	165	8.2532e-06	61	2	5.57383
ZFHX4	NC_006089.4	119722610	119876959	+	20	469	0	0	20	33	436	1.0412e-05	62	80	3.11883
USH2A	NC_006090.4	20386252	20756743	+	16	318	0	3	13	54	264	1.05088e-05	63	>200	0
ATP11B	NC_006096.4	16480427	16580464	-	15	286	0	0	15	25	261	1.20542e-05	64	>200	0
ZNF608	NC_006127.4	79623730	79721327	+	15	293	0	0	15	22	271	1.60049e-05	65	31	2.78245
LOC424300	NC_006094.4	31723864	31887843	-	12	196	0	0	12	9	187	1.93864e-05	66	>200	0
SHCBP1	NC_006098.4	7987710	8002774	+	5	25	0	0	5	3	22	1.99676e-05	67	>200	0
UQCRFS1	NC_006098.4	8237376	8240729	-	6	42	0.0001	0	6	0	42	2.21436e-05	68	>200	0
IRX3	NC_006098.4	4647768	4649896	+	20	507	0.0003	0	20	0	507	3.13879e-05	69	>200	0
C14ORF180	NC_006092.4	51453576	51473699	+	15	312	0	0	15	3	309	3.30639e-05	70	>200	0
ZNF507	NC_006098.4	9887897	9907804	+	15	319	0	0	15	9	310	4.25527e-05	71	>200	0
OTX2	NC_006092.4	55922271	55929736	+	12	221	0	0	12	9	212	6.24397e-05	72	>200	0
MC2R	NC_006089.4	96729117	96746773	+	9	130	0.0003	0	9	3	127	8.14492e-05	73	>200	0
SNX20	NC_006098.4	6298048	6308951	+	9	130	0.0003	0	9	3	127	8.14492e-05	74	>200	0
LOC107054266	NC_006098.4	4278280	4280481	-	10	172	0	0	10	2	170	0.000143384	75	>200	0
URI1	NC_006098.4	8625512	8665926	+	9	140	0	0	9	5	135	0.000143522	76	>200	0
IRX6	NC_006098.4	3977097	3980535	-	12	245	0.0001	0	12	2	243	0.000164726	77	135	2.85217
ZNF800	NC_006088.4	20866983	20887718	+	5	39	0.0002	1	4	12	27	0.000184674	78	>200	0
RP11-505K9.4	NC_006098.4	16757889	16791497	-	11	215	0.0001	0	11	2	213	0.000209037	79	>200	0
LOC101748762	NC_006096.4	12132300	12179011	-	14	330	0.0003	0	14	0	330	0.000219727	80	>200	0
TFAP2D	NC_006090.4	108731921	108786566	-	10	183	0.0002	0	10	9	174	0.000236879	81	31	4.41259
ANKRD32	NC_006127.4	57807565	57848705	-	7	92	0.0002	1	6	5	87	0.000279419	82	>200	0
FAM19A1	NC_006099.4	14957751	15163978	+	10	193	0.0004	0	10	8	185	0.000361748	83	3	5.64345
CDH13	NC_006098.4	16185562	16630514	+	13	307	0.0005	0	13	17	290	0.000369347	84	5	4.15144
ADAMTS18	NC_006098.4	13993420	14063412	-	18	521	0.001	0	18	19	502	0.000380836	85	157	2.43238
CRISP2	NC_006090.4	109168806	109180628	+	9	161	0.0004	0	9	0	161	0.000405655	86	>200	0
KIF26A	NC_006092.4	50785006	50885066	+	14	352	0.0005	1	13	20	332	0.000419569	87	>200	0
CELF4	NC_006127.4	6157343	6890503	+	23	761	0.0008	1	22	12	749	0.000433744	88	1	5.82968
DAAM2	NC_006090.4	28814228	29011772	-	7	99	0.0008	0	7	22	77	0.000437274	89	61	2.77833
FAM172A	NC_006127.4	58092017	58355900	+	10	199	0.0005	0	10	5	194	0.000460056	90	116	2.5927
NKD1	NC_006098.4	6358177	6468506	-	9	164	0.0003	2	7	17	147	0.000463927	91	>200	0
ESRRG	NC_006090.4	20241793	20358377	+	14	357	0.0004	0	14	7	350	0.000482087	92	17	4.18984
BRINP1	NC_006104.4	4502517	4580970	-	20	626	0.0003	0	20	8	618	0.000503114	93	4	5.89618
GYPC	NC_006094.4	24152194	24178854	-	11	241	0.0007	0	11	4	237	0.000548842	94	>200	0
PCDH7	NC_006091.4	72046260	72304647	-	8	137	0.0008	0	8	21	116	0.000630257	95	2	4.10095
LOC100857777	NC_006098.4	19944361	19949539	+	13	326	0.001	0	13	0	326	0.000646832	96	>200	0
PSMD7	NC_006098.4	19316519	19321831	-	13	327	0.0005	0	13	1	326	0.000665322	97	>200	0
ZIC4	NC_006096.4	11914803	11933671	-	10	210	0.0004	0	10	10	200	0.000697787	98	19	3.98821
ADRA2C	NC_006091.4	82141157	82154008	-	4	31	0.0008	1	3	8	23	0.00081169	99	5	5.31872
LOC101747537	NC_006091.4	71002392	71011893	+	8	144	0.0013	0	8	0	144	0.000872877	100	>200	0
SNRK	NC_006089.4	41157926	41197278	-	4	32	0.0007	0	4	6	26	0.000917659	101	60	3.03287
FAM19A4	NC_006099.4	15216977	15289827	-	8	146	0.0011	0	8	6	140	0.000954439	102	>200	0
DIAPH3	NC_006088.4	162382456	162621744	+	11	260	0.0021	0	11	14	246	0.00101976	103	>200	0
ABI3BP	NC_006088.4	84984069	85117219	-	4	33	0.001	0	4	15	18	0.001033	104	>200	0
SEL1L	NC_006092.4	40983624	41014345	-	8	148	0.0008	0	8	13	135	0.00104199	105	>200	0
IRX5	NC_006098.4	4281687	4284792	-	12	309	0.0021	0	12	1	308	0.00128402	106	>200	0
POMGNT2	NC_006089.4	41252577	41284661	+	3	17	0.0015	0	3	3	14	0.00149623	107	33	3.22833
RP11-385J1.3	NC_006096.4	17664973	17782230	-	8	157	0.0011	0	8	13	144	0.00151859	108	>200	0
XRCC4	NC_006127.4	62788277	62969049	-	5	63	0.0013	0	5	1	62	0.00172138	109	>200	0
NLGN1	NC_006096.4	18809663	19157393	-	10	237	0.0016	1	9	12	225	0.00172913	110	4	5.17867
LRRC4C	NC_006092.4	20503908	20955628	-	7	126	0.0027	0	7	8	118	0.00180717	111	8	5.8944
TRDN	NC_006090.4	60991949	61132154	+	8	162	0.0015	0	8	5	157	0.00184966	112	>200	0
MAMLD1	NC_006091.4	17863213	17942344	-	8	163	0.0026	0	8	10	153	0.00192223	113	4	4.70939
HMX1	NC_006091.4	81985614	81988279	-	3	19	0.0036	0	3	0	19	0.00208918	114	>200	0
OLFM4	NC_006088.4	165561980	165586181	-	12	328	0.0021	0	12	2	326	0.00210791	115	>200	0
CNTNAP5	NC_006094.4	24536859	24815016	-	12	329	0.0018	0	12	14	315	0.00216107	116	15	4.09888
C3ORF30	NC_006088.4	80801074	80804289	-	16	513	0.0032	0	16	0	513	0.0022061	117	>200	0
FLRT2	NC_006092.4	42172881	42235676	+	10	248	0.0023	0	10	10	238	0.00240379	118	17	3.06971
RRP15	NC_006090.4	19442917	19477011	-	8	170	0.0019	0	8	5	165	0.00249507	119	>200	0
NARS2	NC_006088.4	192670661	192723417	+	5	70	0.0032	0	5	3	67	0.002741	120	>200	0
PROX1	NC_006090.4	21309365	21357222	-	12	342	0.002	1	11	11	331	0.00295747	121	>200	0
CYP3A7	NC_006101.4	3928052	3937393	-	3	22	0.0034	0	3	0	22	0.00322062	122	>200	0
NFATC3	NC_006098.4	3418509	3479459	-	4	45	0.003	0	4	21	24	0.00330471	123	>200	0
CDH19	NC_006089.4	95537611	95554141	+	5	74	0.0041	0	5	3	71	0.00348902	124	>200	0
STIM2	NC_006091.4	73554049	73619282	-	8	180	0.0044	0	8	17	163	0.00353554	125	27	3.51865
OTOL1	NC_006096.4	22024777	22030356	-	5	75	0.0039	0	5	0	75	0.00369681	126	>200	0
CBLN1	NC_006098.4	7161477	7163944	+	11	307	0.0043	1	10	5	302	0.00370022	127	14	5.4986
TNMD	NC_006091.4	5224420	5232215	-	2	7	0.0043	0	2	2	5	0.00373558	128	>200	0
FAM19A5	NC_006088.4	17084225	17504584	+	11	308	0.0038	0	11	10	298	0.00379099	129	4	5.25211
ISX	NC_006088.4	52290223	52317487	-	7	146	0.005	0	7	1	145	0.00411052	130	>200	0
LOC101749307	NC_006107.4	3778182	3779980	+	6	110	0.0038	0	6	0	110	0.00412815	131	>200	0
COL11A1	NC_006095.4	11151567	11318749	+	5	77	0.0032	1	4	29	48	0.00413875	132	>200	0
GRIP2	NC_006099.4	11044109	11256598	-	4	48	0.0043	0	4	9	39	0.00417891	133	>200	0
BORA	NC_006088.4	156259756	156279329	-	8	186	0.0034	0	8	1	185	0.00430417	134	>200	0
DBX1	NC_006092.4	2002977	2007671	-	5	78	0.0046	0	5	5	73	0.00437328	135	>200	0
SI	NC_006096.4	21250754	21295745	+	5	78	0.0046	0	5	0	78	0.00437328	136	>200	0
RPS23	NC_006127.4	63358843	63360872	+	5	78	0.0046	0	5	0	78	0.00437328	137	>200	0
RBMS3	NC_006089.4	39050906	39749690	+	13	406	0.0056	0	13	24	382	0.00439008	138	30	3.04451
BIN1	NC_006094.4	23809924	23896240	+	6	112	0.0039	0	6	15	97	0.00450705	139	61	3.12055
FGF13	NC_006091.4	4774239	5001908	-	7	150	0.005	0	7	7	143	0.00475992	140	6	4.6765
TFG	NC_006088.4	84962533	84981084	+	2	8	0.0058	0	2	3	5	0.00493575	141	>200	0
PIP5K1C	NC_006115.4	991887	1025358	+	2	8	0.0058	2	0	8	0	0.00493575	142	8	5.16424
FZD8	NC_006089.4	12831346	12834071	+	11	321	0.0052	0	11	2	319	0.00514088	143	>200	0
SLC4A1AP	NC_006090.4	27857468	27873684	-	4	51	0.0048	0	4	3	48	0.00519704	144	>200	0
KCTD3	NC_006090.4	20757154	20783006	-	8	196	0.0063	0	8	6	190	0.00586319	145	>200	0
LOC100859897	NC_006088.4	163983202	163983832	+	6	120	0.0072	0	6	0	120	0.00628204	146	>200	0
CDK5RAP2	NC_006104.4	5032684	5106426	-	11	335	0.0062	0	11	13	322	0.00699223	147	>200	0
RPGRIP1L	NC_006098.4	4974841	5038554	+	8	203	0.007	0	8	4	199	0.0071867	148	11	3.78512
METTL22	NC_006101.4	10160754	10192916	-	13	433	0.0065	0	13	3	430	0.0073733	149	>200	0
MCTP1	NC_006127.4	57530563	57796560	+	4	57	0.0086	0	4	8	49	0.00770395	150	25	4.04133
CHGA	NC_006092.4	44953298	44963496	+	2	10	0.0107	0	2	4	6	0.00778992	151	>200	0
GPATCH2	NC_006090.4	19766194	19870621	+	7	167	0.0097	0	7	11	156	0.0084102	152	>200	0
LOC107054428	NC_006099.4	11027821	11038776	-	4	60	0.0096	0	4	6	54	0.00921068	153	>200	0
ESRP2	NC_006098.4	3355521	3399135	+	3	32	0.0111	0	3	13	19	0.00937568	154	>200	0
C8ORF22	NC_006089.4	108833027	108836397	+	2	11	0.0093	0	2	0	11	0.00943524	155	>200	0
METTL14	NC_006091.4	55332947	55377694	-	2	11	0.0093	0	2	5	6	0.00943524	156	>200	0
SPATA17	NC_006090.4	19676487	19766954	-	9	258	0.0115	0	9	4	254	0.00966546	157	>200	0
LOC772269	NC_006091.4	18095520	18115047	-	5	95	0.0107	0	5	1	94	0.00994053	158	>200	0
LOC101748913	NC_006088.4	153734147	153735735	-	5	96	0.0116	0	5	0	96	0.0103715	159	>200	0
LINC00954	NC_006090.4	101789576	101807606	+	7	174	0.0103	0	7	5	169	0.010394	160	>200	0
ABCB5	NC_006089.4	30151560	30189828	+	3	34	0.0113	2	1	11	23	0.0110859	161	>200	0
TBC1D22A	NC_006088.4	16200255	16355410	+	6	137	0.012	0	6	9	128	0.0116551	162	>200	0
SUCLG2	NC_006099.4	14765178	14867143	-	6	138	0.0134	0	6	9	129	0.0120479	163	>200	0
LOC107053385	NC_006092.4	11270939	11273267	-	7	180	0.0143	0	7	2	178	0.0123482	164	>200	0
TGFBR2	NC_006089.4	39945498	40009681	+	12	413	0.0135	0	12	10	403	0.0124019	165	>200	0
CNTN3	NC_006099.4	16925254	17017528	-	6	139	0.013	0	6	8	131	0.0124498	166	10	4.28264
PSAT1	NC_006127.4	37963261	37978946	+	6	140	0.0135	0	6	5	135	0.0128611	167	>200	0
SEC61G	NC_006089.4	52289914	52293717	+	3	36	0.0149	0	3	0	36	0.0129644	168	>200	0
LRRC16A	NC_006089.4	90220685	90394880	-	3	36	0.0149	1	2	24	12	0.0129644	169	>200	0
SPATA6	NC_006095.4	22703807	22754316	-	15	570	0.0132	0	15	9	561	0.0131104	170	117	2.55869
MYRIP	NC_006089.4	44153559	44359153	-	2	13	0.0148	1	1	6	7	0.0131413	171	8	5.36054
PXK	NC_006099.4	11817540	11849746	+	2	13	0.0148	2	0	10	3	0.0131413	172	>200	0
LOC419333	NC_006107.4	12281063	12311010	+	2	13	0.0148	1	1	9	4	0.0131413	173	>200	0
ST8SIA4	NC_006127.4	50646216	50699691	+	2	13	0.0148	1	1	4	9	0.0131413	174	>200	0
PTPLB	NC_006094.4	27302564	27322244	-	4	67	0.014	0	4	8	59	0.0134379	175	>200	0
GATA3	NC_006088.4	4393443	4420572	+	13	469	0.0157	0	13	6	463	0.0136136	176	>200	0
HIST1H2A3	NC_006088.4	48091382	48091843	+	1	1	0.0132	1	0	1	0	0.0136467	177	>200	0
HIST1H2B8	NC_006088.4	48111336	48111716	+	1	1	0.0132	1	0	1	0	0.0136467	178	>200	0
HIST1H2B7L4	NC_006088.4	48198952	48199564	-	1	1	0.0132	1	0	1	0	0.0136467	179	>200	0
FAM20CL	NC_006088.4	50833630	50841967	+	1	1	0.0132	1	0	1	0	0.0136467	180	>200	0
INSM1	NC_006090.4	3828506	3830388	-	1	1	0.0132	0	1	0	1	0.0136467	181	>200	0
EGR4	NC_006091.4	90249880	90252929	+	1	1	0.0132	0	1	0	1	0.0136467	182	5	5.65786
ORC6	NC_006098.4	7944056	7949255	-	1	1	0.0132	0	1	0	1	0.0136467	183	>200	0
TLCD1	NC_006106.4	5807306	5808996	-	1	1	0.0132	0	1	0	1	0.0136467	184	>200	0
ZNF414	NC_006115.4	1734238	1740036	-	1	1	0.0132	0	1	0	1	0.0136467	185	>200	0
CA9	NC_006127.4	9226406	9236696	-	1	1	0.0132	0	1	0	1	0.0136467	186	>200	0
TLE4	NC_006127.4	38471655	38569978	+	9	274	0.0156	0	9	14	260	0.0138627	187	>200	0
TMEM179	NC_006092.4	51484528	51491786	-	3	37	0.0147	0	3	5	32	0.0139674	188	2	5.42965
IGSF9B	NC_006111.4	2423692	2468316	-	3	37	0.0147	0	3	13	24	0.0139674	189	6	4.86953
MMP16	NC_006089.4	124196143	124391614	-	5	104	0.0146	0	5	18	86	0.0142865	190	3	4.9472
2019-09-09	NC_006105.4	3777824	3873088	+	5	104	0.0146	0	5	8	96	0.0142865	191	NA	NA
LOC107051640	NC_006088.4	163980536	163981752	+	4	69	0.0178	0	4	0	69	0.0148378	192	>200	0
POMP	NC_006088.4	175798273	175806119	-	2	14	0.0162	0	2	1	13	0.0151939	193	>200	0
SVIP	NC_006092.4	3016779	3020197	-	2	14	0.0162	0	2	0	14	0.0151939	194	82	2.75865
EPB41L4A	NC_006127.4	46187192	46314708	+	2	14	0.0162	0	2	4	10	0.0151939	195	>200	0
GRIK2	NC_006090.4	70379455	70752554	-	5	106	0.014	0	5	21	85	0.0154007	196	1	5.72582
LOC768391	NC_006095.4	37519	44695	-	4	70	0.0186	0	4	0	70	0.0155709	197	>200	0
KLF6	NC_006089.4	11799038	11807999	-	10	328	0.0172	0	10	9	319	0.0157847	198	>200	0
LOC101751936	NC_006090.4	61149287	61200823	+	3	39	0.0166	0	3	0	39	0.0161022	199	>200	0
KIAA0825	NC_006127.4	57848729	58078152	+	4	72	0.0174	0	4	21	51	0.0171046	200	>200	0
DYNLRB2	NC_006098.4	15331197	15335929	+	11	382	0.019	0	11	0	382	0.0171832	201	>200	0
OPN5	NC_006090.4	110567075	110594205	+	2	15	0.0179	0	2	3	12	0.0173742	202	>200	0
ADCY7	NC_006098.4	6646145	6705033	-	2	15	0.0179	0	2	7	8	0.0173742	203	>200	0
GNB1	NC_006108.4	1923153	1956964	+	2	15	0.0179	2	0	8	7	0.0173742	204	39	3.65356
AMY2A	NC_006095.4	46119	407031	-	6	150	0.0175	0	6	2	148	0.0175083	205	>200	0
ZBED4	NC_006088.4	18815682	18840096	+	5	110	0.0181	1	4	11	99	0.0177998	206	>200	0
MRAS	NC_006094.4	25369611	25403948	+	7	194	0.0187	0	7	4	190	0.0179129	207	6	5.43922
PCDH19	NC_006091.4	5247641	5300179	+	10	335	0.0162	0	10	12	323	0.017991	208	1	4.97223
LOC107051888	NC_006127.4	5427773	5429797	-	13	488	0.0188	0	13	0	488	0.0182295	209	>200	0
POU4F1	NC_006088.4	153534234	153538704	+	5	111	0.018	0	5	4	107	0.0184359	210	154	2.71442
PPP1R3D	NC_006107.4	7055801	7061084	-	6	152	0.02	0	6	1	151	0.0185594	211	>200	0
CENPW	NC_006090.4	59770150	59777194	-	6	153	0.0212	0	6	1	152	0.0191008	212	>200	0
TMEM178B	NC_006088.4	57091544	57302451	+	4	75	0.0201	0	4	5	70	0.0195761	213	2	5.336
GOLGA5	NC_006092.4	44888444	44904588	+	2	16	0.024	0	2	11	5	0.0196784	214	>200	0
CETN3	NC_006127.4	59736140	59752762	+	8	244	0.0197	0	8	2	242	0.0198588	215	>200	0
ANGEL2	NC_006090.4	21756490	21768768	+	8	246	0.0224	0	8	1	245	0.0207317	216	>200	0
RIPK2	NC_006089.4	124817881	124836836	+	3	43	0.0185	0	3	5	38	0.0208911	217	>200	0
AGK	NC_006088.4	57332260	57365118	+	4	77	0.0213	0	4	4	73	0.0213398	218	110	2.70101
TNS1	NC_006094.4	22732771	22773379	+	10	345	0.023	0	10	3	342	0.0215254	219	>200	0
LSAMP	NC_006088.4	82082453	82236106	+	19	829	0.0241	0	19	3	826	0.0217077	220	2	5.24973
SMYD2	NC_006090.4	21199122	21226151	-	5	116	0.0234	0	5	3	113	0.0218406	221	>200	0
TIMD4	NC_006100.4	11469602	11484197	+	5	116	0.0234	0	5	0	116	0.0218406	222	>200	0
NREP	NC_006127.4	46440158	46459626	+	2	17	0.0215	0	2	4	13	0.0221027	223	21	3.85013
ZC3H15	NC_006094.4	1372453	1384586	-	3	44	0.0237	0	3	7	37	0.0221971	224	>200	0
SETBP1	NC_006127.4	2626279	2897599	-	7	204	0.0249	0	7	20	184	0.0228337	225	36	3.14159
OLFM3	NC_006095.4	11447650	11502318	+	3	45	0.0271	0	3	8	37	0.0235465	226	1	5.77505
MAPK9	NC_006100.4	13942115	13962239	+	3	45	0.0271	0	3	8	37	0.0235465	227	14	5.08083
TLR4	NC_006104.4	4083114	4088567	+	9	301	0.0245	0	9	3	298	0.0237898	228	>200	0
RALYL	NC_006089.4	122750127	123128753	+	6	161	0.0274	1	5	10	151	0.0238228	229	3	5.55666
PTPRT	NC_006107.4	2969806	3397732	+	6	161	0.0274	0	6	14	147	0.0238228	230	9	5.39447
LOC416086	NC_006099.4	14658225	14682233	+	4	80	0.0286	0	4	2	78	0.0241623	231	>200	0
LOC420491	NC_006089.4	16120013	16146687	+	2	18	0.0262	2	0	5	13	0.0246434	232	>200	0
WDR75	NC_006094.4	393787	410607	-	2	18	0.0262	0	2	5	13	0.0246434	233	>200	0
PAPD5	NC_006098.4	6713821	6749377	-	2	18	0.0262	0	2	11	7	0.0246434	234	>200	0
AGBL4	NC_006095.4	22771834	23612118	-	14	563	0.0285	0	14	17	546	0.0246808	235	15	4.47007
SLC5A9	NC_006095.4	22686498	22709436	+	5	120	0.0252	0	5	4	116	0.02484	236	>200	0
RSPO3	NC_006090.4	59437846	59497439	-	5	121	0.026	0	5	6	115	0.025629	237	>200	0
ZIC3	NC_006091.4	4573967	4589223	+	6	164	0.0297	0	6	9	155	0.025778	238	>200	0
ALX1	NC_006088.4	41850128	41873707	+	4	82	0.0237	0	4	7	75	0.0261634	239	>200	0
FIGN	NC_006094.4	20583699	20684258	+	7	210	0.0273	1	6	20	190	0.0261957	240	>200	0
SGCD	NC_006100.4	11476928	11831875	-	7	210	0.0273	1	6	13	197	0.0261957	241	>200	0
TPK1	NC_006089.4	52858574	53196804	-	3	47	0.0296	0	3	3	44	0.0263759	242	>200	0
LARGE	NC_006088.4	52727461	53014555	+	7	211	0.0265	0	7	20	191	0.0267871	243	>200	0
KIAA1551	NC_006088.4	59379433	59429385	-	1	2	0.0267	0	1	0	2	0.0271072	244	>200	0
LOC107054378	NC_006088.4	76262382	76274156	-	1	2	0.0267	0	1	1	1	0.0271072	245	>200	0
SFRP4	NC_006089.4	46310775	46320332	+	1	2	0.0267	0	1	0	2	0.0271072	246	>200	0
NPBWR1	NC_006089.4	110434814	110437640	+	1	2	0.0267	1	0	2	0	0.0271072	247	109	2.81471
RPL7L1	NC_006091.4	54895202	54898868	-	1	2	0.0267	0	1	0	2	0.0271072	248	>200	0
HRG	NC_006096.4	16205205	16216610	+	1	2	0.0267	0	1	0	2	0.0271072	249	>200	0
BCL2A1	NC_006097.4	12637320	12639335	+	1	2	0.0267	0	1	1	1	0.0271072	250	>200	0
APH1A	NC_006127.4	9221531	9226026	+	1	2	0.0267	0	1	0	2	0.0271072	251	>200	0
CCDC82	NC_006088.4	184977031	184990275	+	5	123	0.032	0	5	0	123	0.0272546	252	>200	0
BAMBI	NC_006089.4	15317843	15321681	-	5	123	0.032	0	5	2	121	0.0272546	253	>200	0
FILIP1L	NC_006088.4	84621650	84818261	+	2	19	0.0291	2	0	11	8	0.0272968	254	>200	0
IL17REL	NC_006088.4	20028245	20070797	-	6	167	0.0309	0	6	5	162	0.027837	255	>200	0
MTPAP	NC_006089.4	14992906	15014991	-	5	124	0.0289	0	5	5	119	0.0280915	256	>200	0
HMGCLL1	NC_006090.4	87805618	87878838	+	4	85	0.0294	0	4	4	81	0.029346	257	4	4.639
PTCHD4	NC_006090.4	110634004	110721058	-	4	85	0.0294	0	4	7	78	0.029346	258	6	5.25417
GABRA3	NC_006091.4	10795874	10857959	+	3	49	0.0277	1	2	9	40	0.0293788	259	10	5.58598
DTHD1	NC_006091.4	70625209	70638449	-	3	49	0.0277	0	3	4	45	0.0293788	260	>200	0
LOC100858320	NC_006090.4	85139324	85914286	+	5	126	0.03	0	5	16	110	0.0298135	261	>200	0
MALSU1	NC_006089.4	31202450	31208491	+	2	20	0.034	0	2	0	20	0.0300595	262	>200	0
GAS2	NC_006092.4	2923400	3016229	+	2	20	0.034	0	2	7	13	0.0300595	263	>200	0
AGA	NC_006091.4	42504432	42516362	+	7	217	0.0343	0	7	1	216	0.0305263	264	>200	0
ZBBX	NC_006096.4	20760642	20775007	+	3	50	0.03	0	3	0	50	0.030945	265	>200	0
LYPD1	NC_006094.4	29920902	29935804	-	6	172	0.0325	0	6	0	172	0.0315041	266	3	5.40984
TFEC	NC_006088.4	25289184	25351175	+	9	317	0.033	0	9	5	312	0.03163	267	>200	0
HDAC9	NC_006089.4	29160126	29608767	+	7	220	0.03	0	7	34	186	0.032521	268	2	4.5924
CDCA7L	NC_006089.4	30643562	30682258	-	3	51	0.0321	0	3	1	50	0.0325542	269	>200	0
TOPAZ1	NC_006089.4	40797691	40842195	-	3	51	0.0321	0	3	4	47	0.0325542	270	>200	0
ANK2	NC_006091.4	57097883	57277907	-	3	51	0.0321	1	2	23	28	0.0325542	271	2	5.16502
MEF2C	NC_006127.4	60303678	60440726	+	9	319	0.0313	0	9	19	300	0.0327223	272	5	6.254
BCHE	NC_006096.4	21043977	21090156	+	4	89	0.0338	0	4	1	88	0.0339309	273	135	2.75171
IGFBP5	NC_006094.4	23358477	23376394	+	10	376	0.0388	0	10	3	373	0.0356597	274	>200	0
IMPG2	NC_006088.4	85204682	85257589	-	2	22	0.0337	0	2	10	12	0.0358986	275	>200	0
LOC107057518	NC_006088.4	116840769	116843133	-	2	22	0.0337	0	2	0	22	0.0358986	276	>200	0
LOC100857292	NC_006088.4	117435547	117444793	-	2	22	0.0337	0	2	0	22	0.0358986	277	>200	0
SPERT	NC_006088.4	167849314	167853764	+	2	22	0.0337	0	2	0	22	0.0358986	278	>200	0
DEGS2	NC_006092.4	48555653	48574205	-	2	22	0.0337	0	2	2	20	0.0358986	279	>200	0
MYLK	NC_006094.4	27324149	27507722	-	4	91	0.0369	0	4	26	65	0.0363706	280	>200	0
ABHD5	NC_006089.4	40990423	41020031	-	3	54	0.0382	0	3	6	48	0.0376383	281	>200	0
FBXO6	NC_006108.4	5659995	5667607	-	3	54	0.0382	0	3	1	53	0.0376383	282	>200	0
KHDRBS2	NC_006090.4	86406227	86748750	+	4	93	0.0374	0	4	7	86	0.0389088	283	9	4.11799
FBXO5	NC_006090.4	49757053	49762742	-	2	23	0.0416	0	2	0	23	0.0389683	284	>200	0
FANCF	NC_006092.4	2902160	2904877	-	2	23	0.0416	0	2	0	23	0.0389683	285	>200	0
PPM1K	NC_006091.4	47314981	47333127	-	3	55	0.0402	0	3	4	51	0.0394177	286	58	2.97914
ECHDC3	NC_006088.4	6163731	6168480	+	1	3	0.0459	0	1	0	3	0.040384	287	>200	0
TMBIM4	NC_006088.4	34370162	34377467	-	1	3	0.0459	0	1	0	3	0.040384	288	>200	0
HIST1H2B7L2	NC_006088.4	48177942	48178694	+	1	3	0.0459	1	0	1	2	0.040384	289	>200	0
HENMT1	NC_006095.4	1239574	1248711	-	1	3	0.0459	0	1	1	2	0.040384	290	>200	0
LOC427545	NC_006098.4	7970813	7976704	-	1	3	0.0459	0	1	2	1	0.040384	291	>200	0
R3HDML	NC_006107.4	5593858	5597915	-	1	3	0.0459	0	1	0	3	0.040384	292	>200	0
KIAA2013	NC_006108.4	5534029	5538881	+	1	3	0.0459	1	0	3	0	0.040384	293	>200	0
CAPSL	NC_006127.4	10904842	10925919	-	1	3	0.0459	0	1	2	1	0.040384	294	>200	0
HABP4	NC_006127.4	42179846	42201841	+	1	3	0.0459	1	0	1	2	0.040384	295	11	4.12441
TNRC6C	NC_006105.4	4012576	4101605	+	5	138	0.044	0	5	23	115	0.0415288	296	16	3.24376
LOC427595	NC_006099.4	15614625	15638918	+	4	95	0.0408	0	4	6	89	0.0415456	297	>200	0
TWIST1	NC_006089.4	29649392	29651300	-	6	185	0.0438	0	6	2	183	0.0424629	298	>200	0
SLIT2	NC_006091.4	75487239	75767455	-	7	234	0.0472	0	7	27	207	0.0429732	299	>200	0
NEK10	NC_006089.4	38501592	38575922	-	3	57	0.0425	0	3	8	49	0.0431021	300	>200	0
EGFLAM	NC_006127.4	11920388	11993974	+	3	57	0.0425	0	3	6	51	0.0431021	301	>200	0
RNF217	NC_006090.4	60313595	60376646	-	5	140	0.0441	0	5	6	134	0.0437158	302	>200	0
LOC100857117	NC_006091.4	28172128	28173788	-	10	391	0.0471	0	10	0	391	0.0444042	303	>200	0
LOC101748831	NC_006088.4	192448590	192602478	+	7	236	0.0441	1	6	23	213	0.0446239	304	>200	0
OGT	NC_006091.4	2213587	2231512	-	2	25	0.0464	2	0	17	8	0.0453919	305	26	3.85411
UGT8	NC_006091.4	56620972	56680966	-	2	25	0.0464	0	2	4	21	0.0453919	306	24	3.4076
CRISPLD2	NC_006098.4	17137626	17166688	+	2	25	0.0464	0	2	5	20	0.0453919	307	>200	0
DHRS3	NC_006108.4	5302593	5342428	+	2	25	0.0464	0	2	11	14	0.0453919	308	>200	0
TNFSF11	NC_006088.4	166505163	166527844	+	3	59	0.0469	0	3	3	56	0.0469521	309	>200	0
RASGEF1C	NC_006100.4	14051231	14121153	+	3	59	0.0469	0	3	8	51	0.0469521	310	3	5.76464
MAD2L1	NC_006091.4	54891159	54894593	+	3	60	0.0483	0	3	3	57	0.0489385	311	>200	0
SPATA16	NC_006096.4	19213109	19298883	+	4	101	0.0539	0	4	2	99	0.0500471	312	>200	0
LOC100859258	NC_006091.4	76243278	76245220	+	5	146	0.0519	0	5	0	146	0.050684	313	>200	0
NTNG1	NC_006095.4	821327	967216	+	5	146	0.0519	0	5	14	132	0.050684	314	3	5.46806
PNPLA4	NC_006088.4	126180348	126200187	+	3	61	0.054	0	3	2	59	0.0509654	315	>200	0
LOC107053388	NC_006092.4	11278336	11510509	-	6	194	0.057	0	6	9	185	0.0512941	316	>200	0
FGF4	NC_006092.4	17590651	17593587	-	2	27	0.0514	0	2	2	25	0.0521734	317	>200	0
BRD7	NC_006098.4	6630401	6644729	+	3	62	0.051	0	3	3	59	0.0530324	318	>200	0
RPS19BP1	NC_006088.4	50625401	50627548	+	1	4	0.0498	0	1	0	4	0.0534797	319	>200	0
TAGLN3	NC_006088.4	88573292	88584475	+	1	4	0.0498	0	1	1	3	0.0534797	320	4	5.08826
RALGAPA2	NC_006090.4	3709697	3825890	+	1	4	0.0498	0	1	0	4	0.0534797	321	>200	0
TMEM156	NC_006091.4	69885284	69913694	+	1	4	0.0498	0	1	0	4	0.0534797	322	>200	0
CDHR2	NC_006100.4	10368262	10376440	-	1	4	0.0498	0	1	0	4	0.0534797	323	>200	0
CARTPT	NC_006127.4	73143788	73145013	+	1	4	0.0498	0	1	0	4	0.0534797	324	52	3.70145
NAA30	NC_006092.4	55648383	55668690	-	2	28	0.0583	0	2	10	18	0.0556907	325	>200	0
IL1RAP	NC_006096.4	13898666	13940246	-	2	28	0.0583	1	1	7	21	0.0556907	326	>200	0
CYLD	NC_006098.4	6271943	6299396	-	4	106	0.0591	0	4	14	92	0.0578049	327	44	3.59059
MYOZ2	NC_006091.4	55132527	55149751	-	2	29	0.0629	0	2	6	23	0.0592886	328	>200	0
SCYL3	NC_006095.4	5073324	5086436	+	2	29	0.0629	0	2	2	27	0.0592886	329	>200	0
HCN4	NC_006097.4	1953384	2050669	-	2	29	0.0629	0	2	14	15	0.0592886	330	>200	0
ZNF804A	NC_006094.4	1797879	1934614	-	3	65	0.0579	0	3	4	61	0.0594705	331	38	3.43848
PITX1	NC_006100.4	15693571	15707183	+	4	108	0.0619	0	4	1	107	0.0610776	332	>200	0
RASSF9	NC_006088.4	42126305	42156030	-	3	66	0.0605	0	3	8	58	0.0616943	333	>200	0
MTM1	NC_006091.4	17808968	17851690	-	3	66	0.0605	0	3	8	58	0.0616943	334	>200	0
LOC424998	NC_006096.4	20358799	20564223	-	8	308	0.0629	0	8	12	296	0.0627235	335	>200	0
FAM84A	NC_006090.4	99002437	99011816	+	4	109	0.0655	0	4	6	103	0.06275	336	3	5.28575
MPHOSPH6	NC_006098.4	16021209	16028384	-	4	109	0.0655	1	3	4	105	0.06275	337	>200	0
LOC101751321	NC_006088.4	114247621	114259443	-	2	30	0.0632	0	2	0	30	0.0629642	338	>200	0
LOC415758	NC_006098.4	8540156	8569818	-	2	30	0.0632	0	2	3	27	0.0629642	339	>200	0
ACPL2	NC_006096.4	6836838	6894412	+	9	363	0.0614	0	9	4	359	0.0636489	340	>200	0
C3ORF58	NC_006096.4	10928446	10942757	+	3	67	0.0678	0	3	3	64	0.0639563	341	>200	0
ZNF423	NC_006098.4	6817502	7014908	+	7	258	0.0734	0	7	15	243	0.0654744	342	10	3.57142
SLC30A10	NC_006090.4	18887090	18908918	+	4	111	0.0638	0	4	3	108	0.0661662	343	>200	0
ABRA	NC_006089.4	131613633	131620700	-	3	68	0.066	0	3	0	68	0.0662561	344	>200	0
A2ML3	NC_006088.4	76289025	76327246	-	1	5	0.0694	0	1	4	1	0.0663968	345	>200	0
CHD1L	NC_006088.4	80530557	80553409	-	1	5	0.0694	1	0	2	3	0.0663968	346	>200	0
LOC101747311	NC_006088.4	115837181	115846178	-	1	5	0.0694	0	1	0	5	0.0663968	347	>200	0
LOC420562	NC_006089.4	23340820	23434932	+	1	5	0.0694	1	0	3	2	0.0663968	348	>200	0
ACTA1	NC_006090.4	40139160	40141549	-	1	5	0.0694	0	1	2	3	0.0663968	349	>200	0
GJB1	NC_006091.4	2330647	2333324	-	1	5	0.0694	0	1	1	4	0.0663968	350	>200	0
COX18	NC_006091.4	51052752	51060857	-	1	5	0.0694	0	1	0	5	0.0663968	351	>200	0
PAK6	NC_006092.4	590655	617605	+	1	5	0.0694	0	1	1	4	0.0663968	352	4	5.73598
PLCB2	NC_006092.4	617467	659468	-	1	5	0.0694	0	1	1	4	0.0663968	353	>200	0
DEPDC7	NC_006092.4	7058582	7066885	-	1	5	0.0694	0	1	2	3	0.0663968	354	>200	0
STXBP3	NC_006095.4	1269923	1295452	+	1	5	0.0694	0	1	3	2	0.0663968	355	>200	0
ABCF3	NC_006096.4	15889765	15897463	+	1	5	0.0694	0	1	3	2	0.0663968	356	>200	0
RFC4	NC_006096.4	16254610	16265469	-	1	5	0.0694	0	1	4	1	0.0663968	357	>200	0
ERLIN2	NC_006109.4	2202459	2214190	+	1	5	0.0694	0	1	1	4	0.0663968	358	>200	0
ANP32B	NC_006115.4	1724060	1732847	+	1	5	0.0694	0	1	4	1	0.0663968	359	>200	0
SLC17A6	NC_006092.4	2768719	2800390	+	2	31	0.0667	0	2	8	23	0.0667147	360	9	4.72157
METTL11B	NC_006095.4	4951112	5007558	-	2	31	0.0667	0	2	7	24	0.0667147	361	>200	0
LOC107052757	NC_006089.4	120244001	120340694	+	4	112	0.0661	0	4	0	112	0.0679099	362	>200	0
TPGS2	NC_006127.4	7103001	7126998	+	12	537	0.0669	0	12	3	534	0.0680238	363	17	3.582
SLC35B3	NC_006089.4	64338393	64365868	+	10	424	0.0733	0	10	7	417	0.0684674	364	>200	0
EPHA4	NC_006096.4	7626766	7841515	-	10	425	0.0686	0	10	22	403	0.0693042	365	2	5.44377
ARL4A	NC_006089.4	26855397	26858311	+	5	160	0.0657	0	5	6	154	0.0693248	366	>200	0
PAX6	NC_006092.4	5201934	5218828	-	5	160	0.0657	0	5	6	154	0.0693248	367	>200	0
KIF26B	NC_006090.4	34435061	34728229	-	4	113	0.0672	0	4	27	86	0.0696771	368	>200	0
LOC107052356	NC_006127.4	58370199	58373194	-	4	113	0.0672	0	4	0	113	0.0696771	369	>200	0
CNOT10	NC_006089.4	40640429	40669625	+	2	32	0.0735	0	2	10	22	0.0705373	370	>200	0
VIP	NC_006090.4	49646763	49653487	+	2	32	0.0735	0	2	5	27	0.0705373	371	10	6.47608
GFRAL	NC_006090.4	87878749	87911416	-	2	32	0.0735	0	2	5	27	0.0705373	372	12	4.87491
COL3A1	NC_006094.4	583968	647380	-	2	32	0.0735	0	2	11	21	0.0705373	373	>200	0
NEO1	NC_006097.4	1760794	1941468	+	2	32	0.0735	0	2	6	26	0.0705373	374	61	2.41928
CCNG1	NC_006100.4	6735692	6741310	-	2	32	0.0735	0	2	2	30	0.0705373	375	>200	0
PCDH10	NC_006091.4	27094884	27133196	+	12	542	0.073	1	11	12	530	0.0717353	376	3	5.28389
HSPBAP1	NC_006094.4	26599873	26632929	-	5	162	0.0766	0	5	5	157	0.0722584	377	>200	0
GDNF	NC_006127.4	11724470	11745751	-	3	71	0.0756	0	3	8	63	0.0733781	378	>200	0
LGI2	NC_006091.4	74060555	74080775	+	2	33	0.0742	0	2	8	25	0.0744293	379	5	5.54328
KCNH5	NC_006092.4	53576767	53733233	+	2	33	0.0742	0	2	14	19	0.0744293	380	4	5.63282
ATP2B2	NC_006099.4	3612830	4010440	+	2	33	0.0742	0	2	22	11	0.0744293	381	3	5.87896
CDH5	NC_006098.4	11674058	11703456	-	6	214	0.0785	0	6	9	205	0.0746553	382	>200	0
PLXNB2	NC_006088.4	20488409	20739387	-	4	116	0.0809	0	4	22	94	0.075119	383	>200	0
TSHZ1	NC_006089.4	91646031	91652837	-	10	432	0.0758	0	10	9	423	0.0753433	384	>200	0
NAV2	NC_006092.4	1693630	1999631	+	3	72	0.0746	0	3	28	44	0.0758248	385	165	2.03469
VAV3	NC_006095.4	992063	1140083	-	3	72	0.0746	0	3	14	58	0.0758248	386	>200	0
LOC107054090	NC_006096.4	16087902	16103254	-	3	72	0.0746	0	3	15	57	0.0758248	387	>200	0
LEF1	NC_006091.4	38153312	38207660	+	4	117	0.0842	0	4	12	105	0.0769792	388	>200	0
LMO3	NC_006088.4	63380640	63450118	-	8	323	0.0771	0	8	5	318	0.0776704	389	1	5.53028
TRAIL-LIKE	NC_006091.4	9628199	9634772	-	2	34	0.0792	0	2	0	34	0.0783883	390	>200	0
NTNG2	NC_006104.4	6918681	6958260	+	2	34	0.0792	0	2	4	30	0.0783883	391	90	3.09016
OLFM1	NC_006104.4	8076212	8103664	+	2	34	0.0792	0	2	4	30	0.0783883	392	8	5.52465
LOC101752020	NC_006088.4	87353993	87368039	-	1	6	0.0837	1	0	2	4	0.0791376	393	>200	0
ERCC5	NC_006088.4	142756269	142772067	-	1	6	0.0837	1	0	6	0	0.0791376	394	>200	0
LOC776146	NC_006089.4	41930217	41935593	-	1	6	0.0837	0	1	0	6	0.0791376	395	>200	0
LOC770405	NC_006089.4	79811771	79817525	+	1	6	0.0837	0	1	0	6	0.0791376	396	>200	0
ZC3H12D	NC_006090.4	48251240	48264728	-	1	6	0.0837	0	1	1	5	0.0791376	397	>200	0
C4H4ORF21	NC_006091.4	57469928	57493979	+	1	6	0.0837	0	1	0	6	0.0791376	398	>200	0
DLST	NC_006092.4	38134317	38149415	+	1	6	0.0837	1	0	5	1	0.0791376	399	>200	0
CTXN2	NC_006097.4	10068516	10076068	+	1	6	0.0837	0	1	0	6	0.0791376	400	7	4.62128
DET1	NC_006097.4	13149476	13171850	+	1	6	0.0837	0	1	2	4	0.0791376	401	>200	0
HSD11B2L	NC_006098.4	1422735	1431969	+	1	6	0.0837	0	1	2	4	0.0791376	402	>200	0
ATP6V0D1	NC_006098.4	1432057	1456454	-	1	6	0.0837	0	1	3	3	0.0791376	403	10	4.18233
CAPNS2	NC_006098.4	3763967	3765334	-	1	6	0.0837	0	1	0	6	0.0791376	404	>200	0
PABPN1	NC_006098.4	18762170	18765810	-	1	6	0.0837	1	0	1	5	0.0791376	405	>200	0
PUM1	NC_006110.4	461709	531721	-	1	6	0.0837	0	1	4	2	0.0791376	406	>200	0
CITED4	NC_006110.4	1422978	1425194	+	1	6	0.0837	0	1	1	5	0.0791376	407	>200	0
ELAVL1	NC_006115.4	915260	942586	-	1	6	0.0837	1	0	6	0	0.0791376	408	>200	0
HTR1A	NC_006127.4	19994197	19995531	-	1	6	0.0837	0	1	0	6	0.0791376	409	2	5.65682
MAFB	NC_006107.4	4836734	4839401	-	10	437	0.0808	0	10	0	437	0.0798515	410	>200	0
LOC418668	NC_006088.4	129326851	129343482	+	6	218	0.0766	0	6	1	217	0.0799471	411	>200	0
MBIP	NC_006092.4	36563357	36576650	-	4	119	0.0862	0	4	3	116	0.0807683	412	>200	0
LOC107052685	NC_006089.4	95232185	95233363	-	2	35	0.0808	0	2	0	35	0.0824116	413	>200	0
LGSN	NC_006090.4	86054377	86071183	+	2	35	0.0808	0	2	5	30	0.0824116	414	>200	0
PRIMA1	NC_006092.4	45350875	45393800	-	2	35	0.0808	0	2	2	33	0.0824116	415	64	3.23706
C6H10ORF71	NC_006093.4	18661432	18680188	+	2	35	0.0808	1	1	8	27	0.0824116	416	>200	0
FUBP3	NC_006104.4	6376557	6414009	+	2	35	0.0808	1	1	10	25	0.0824116	417	>200	0
SIM1	NC_006090.4	71184135	71231201	+	5	169	0.0824	0	5	13	156	0.0830501	418	>200	0
BRMS1L	NC_006092.4	36396648	36415543	+	3	75	0.0841	0	3	9	66	0.0833764	419	5	4.82359
PRDM5	NC_006091.4	54584174	54669141	+	3	76	0.0847	0	3	15	61	0.0859626	420	>200	0
EPHB3	NC_006096.4	16011685	16033878	-	3	76	0.0847	0	3	12	64	0.0859626	421	>200	0
AGBL1	NC_006097.4	13623118	13914436	-	7	276	0.0898	0	7	8	268	0.0862644	422	>200	0
SIAH3	NC_006088.4	167882239	167919952	-	2	36	0.0881	0	2	2	34	0.0864967	423	4	6.30561
LOC107052661	NC_006089.4	82247957	82250877	+	2	36	0.0881	0	2	0	36	0.0864967	424	>200	0
SYNPO2	NC_006091.4	55168867	55260630	-	2	36	0.0881	0	2	16	20	0.0864967	425	>200	0
COX7C	NC_006127.4	61236202	61238740	-	2	36	0.0881	0	2	0	36	0.0864967	426	>200	0
RNF152	NC_006089.4	68733456	68775609	+	4	122	0.0906	0	4	4	118	0.0866213	427	4	4.55134
PLOD2	NC_006096.4	11508277	11558488	-	3	77	0.0885	0	3	13	64	0.0885824	428	>200	0
VTG1	NC_006095.4	18694448	18737086	+	4	123	0.094	0	4	14	109	0.0886168	429	>200	0
PIM3	NC_006088.4	19164431	19168891	-	6	225	0.0952	0	6	4	221	0.0896985	430	>200	0
CDH20	NC_006089.4	68848681	69192758	-	4	124	0.098	0	4	13	111	0.0906343	431	10	4.06408
TRIM71	NC_006089.4	40677658	40726319	-	2	37	0.0929	0	2	8	29	0.0906413	432	>200	0
CHM	NC_006091.4	8597704	8657052	+	2	37	0.0929	0	2	2	35	0.0906413	433	5	4.44505
MARK3	NC_006092.4	50325693	50386896	+	2	37	0.0929	2	0	21	16	0.0906413	434	>200	0
FGF9	NC_006088.4	178382192	178412065	-	6	226	0.0913	0	6	1	225	0.0911421	435	4	4.88078
CXORF21	NC_006088.4	115787423	115796478	+	1	7	0.0937	0	1	1	6	0.0917046	436	>200	0
LOC772218	NC_006088.4	118161203	118172056	-	1	7	0.0937	0	1	0	7	0.0917046	437	>200	0
LOC107050867	NC_006088.4	150161149	150164069	-	1	7	0.0937	0	1	0	7	0.0917046	438	>200	0
LIMD1	NC_006089.4	43016257	43039396	-	1	7	0.0937	0	1	3	4	0.0917046	439	>200	0
STARD3NL	NC_006089.4	46197403	46216344	-	1	7	0.0937	0	1	5	2	0.0917046	440	>200	0
LOC100859371	NC_006095.4	10076736	10095837	-	1	7	0.0937	0	1	0	7	0.0917046	441	>200	0
PDPR	NC_006098.4	1840161	1860861	-	1	7	0.0937	0	1	2	5	0.0917046	442	>200	0
CLEC3A	NC_006098.4	14241342	14248273	+	1	7	0.0937	0	1	2	5	0.0917046	443	>200	0
SREBF1	NC_006101.4	4936161	4946834	-	1	7	0.0937	0	1	0	7	0.0917046	444	>200	0
LRRC48	NC_006101.4	4999604	5015022	+	1	7	0.0937	0	1	1	6	0.0917046	445	>200	0
LSM14B	NC_006107.4	7913107	7925970	+	1	7	0.0937	0	1	5	2	0.0917046	446	41	2.99486
PRPF6	NC_006107.4	9612040	9635964	-	1	7	0.0937	0	1	1	6	0.0917046	447	>200	0
PEX14	NC_006108.4	3735965	3808325	+	1	7	0.0937	1	0	7	0	0.0917046	448	>200	0
CZH18ORF25	NC_006127.4	2087422	2131172	-	1	7	0.0937	1	0	4	3	0.0917046	449	>200	0
PJA2	NC_006127.4	47364104	47402263	+	1	7	0.0937	0	1	0	7	0.0917046	450	3	5.17898
TAL2	NC_006127.4	55084765	55085879	+	1	7	0.0937	0	1	1	6	0.0917046	451	>200	0
LOC107052258	NC_006127.4	28083066	28094318	-	4	125	0.0926	0	4	0	125	0.0926737	452	>200	0
CELF2	NC_006088.4	5778492	5974445	+	12	568	0.0965	0	12	12	556	0.0931105	453	5	5.47438
BEGAIN	NC_006092.4	48743349	48892284	-	3	79	0.1037	0	3	15	64	0.0939211	454	6	5.58526
PTCHD2	NC_006108.4	5718515	5812765	-	3	79	0.1037	0	3	21	58	0.0939211	455	>200	0
C12H3ORF14	NC_006099.4	13145583	13155471	+	7	282	0.0925	0	7	1	281	0.0939388	456	>200	0
RAB28	NC_006091.4	78013069	78074270	+	6	228	0.0936	0	6	4	224	0.0940668	457	34	3.4316
ICOSLG	NC_006088.4	110383415	110393891	-	2	38	0.0914	0	2	0	38	0.0948428	458	>200	0
IGF2BP3	NC_006089.4	31211306	31318684	-	2	38	0.0914	0	2	12	26	0.0948428	459	>200	0
LOC107053122	NC_006090.4	81697458	81699579	+	2	38	0.0914	0	2	0	38	0.0948428	460	>200	0
RPL34	NC_006091.4	37989118	37992417	-	3	80	0.102	0	3	3	77	0.096639	461	>200	0
SPRY1	NC_006091.4	53712801	53718389	-	6	231	0.1019	0	6	2	229	0.0985472	462	>200	0
ZMAT3	NC_006096.4	17628231	17641709	+	2	39	0.0962	0	2	7	32	0.0990991	463	10	3.60489
CDH4	NC_006107.4	7427589	7842217	+	10	457	0.104	0	10	14	443	0.09951	464	4	4.78461
TRHDE	NC_006088.4	36640178	36861001	+	5	179	0.1024	0	5	18	161	0.0998499	465	1	5.86822
VSTM2A	NC_006089.4	82526076	82581354	+	3	82	0.101	0	3	8	74	0.102169	466	1	6.60283
ZIC1	NC_006096.4	11935072	11938591	+	6	234	0.1075	0	6	3	231	0.103139	467	16	4.9999
TES	NC_006088.4	25175209	25201316	-	2	40	0.1055	0	2	5	35	0.103408	468	>200	0
LOC107051645	NC_006088.4	153735225	153739267	-	2	40	0.1055	0	2	0	40	0.103408	469	>200	0
CHUNK-1	NC_006088.4	61050761	61052686	+	1	8	0.1047	0	1	1	7	0.1041	470	>200	0
CSTB	NC_006088.4	76767118	76771461	+	1	8	0.1047	0	1	0	8	0.1041	471	>200	0
ABHD10	NC_006088.4	88559253	88567396	+	1	8	0.1047	0	1	2	6	0.1041	472	>200	0
LOC107057286	NC_006088.4	115846154	115850175	-	1	8	0.1047	0	1	0	8	0.1041	473	>200	0
LOC101750792	NC_006088.4	171966248	171967929	+	1	8	0.1047	0	1	0	8	0.1041	474	>200	0
LOC420992	NC_006089.4	89400201	89427369	+	1	8	0.1047	0	1	4	4	0.1041	475	>200	0
C8ORF59	NC_006089.4	123236569	123250118	-	1	8	0.1047	0	1	2	6	0.1041	476	>200	0
NEK2	NC_006090.4	22192768	22199444	+	1	8	0.1047	0	1	3	5	0.1041	477	>200	0
NLGN3	NC_006091.4	2337313	2353029	-	1	8	0.1047	0	1	1	7	0.1041	478	4	5.13643
VMA21	NC_006091.4	17574423	17579296	-	1	8	0.1047	0	1	1	7	0.1041	479	59	3.01094
MSMO1	NC_006091.4	24031424	24037675	+	1	8	0.1047	0	1	2	6	0.1041	480	110	2.48344
DDX28	NC_006098.4	3524392	3526627	+	1	8	0.1047	0	1	0	8	0.1041	481	>200	0
LSM14A	NC_006098.4	11011309	11029611	+	1	8	0.1047	1	0	7	1	0.1041	482	>200	0
PRELID1	NC_006100.4	10196747	10198547	-	1	8	0.1047	0	1	0	8	0.1041	483	>200	0
POMT1	NC_006104.4	6695504	6709255	+	1	8	0.1047	0	1	3	5	0.1041	484	105	3.03402
WDR45B	NC_006105.4	3429406	3443842	+	1	8	0.1047	0	1	1	7	0.1041	485	>200	0
SLC6A4	NC_006106.4	6198997	6220310	-	1	8	0.1047	1	0	4	4	0.1041	486	47	3.85169
SS18L1	NC_006107.4	7933322	7948386	+	1	8	0.1047	0	1	7	1	0.1041	487	2	5.52764
SOX18	NC_006107.4	9580870	9584407	+	1	8	0.1047	0	1	1	7	0.1041	488	>200	0
ADAM28	NC_006109.4	1049689	1067966	-	1	8	0.1047	0	1	0	8	0.1041	489	>200	0
LYSMD3	NC_006127.4	59688140	59692119	+	1	8	0.1047	0	1	1	7	0.1041	490	>200	0
KCNN2	NC_006127.4	73269214	73338838	-	1	8	0.1047	0	1	4	4	0.1041	491	3	4.40841
IRX1	NC_006089.4	87403988	87412000	+	3	83	0.1067	0	3	6	77	0.104981	492	>200	0
MCHR2	NC_006101.4	14406783	14415076	-	4	131	0.108	0	4	1	130	0.105358	493	40	3.15908
SMARCA1	NC_006091.4	14366386	14394833	+	7	291	0.1086	0	7	21	270	0.106136	494	3	4.39652
TENM1	NC_006091.4	15264602	15591324	+	9	405	0.1072	0	9	33	372	0.106306	495	1	5.78231
C10ORF11	NC_006093.4	14520047	14551551	-	10	464	0.1091	0	10	4	460	0.107002	496	>200	0
EMP1	NC_006088.4	48351489	48365693	+	4	132	0.1057	0	4	3	129	0.107545	497	>200	0
TPH2	NC_006088.4	36509695	36563986	+	2	41	0.1086	0	2	6	35	0.107767	498	28	4.97945
PTPN14	NC_006090.4	21088458	21198115	+	2	41	0.1086	0	2	10	31	0.107767	499	>200	0
EVL	NC_006092.4	48426928	48555746	+	2	41	0.1086	0	2	7	34	0.107767	500	42	3.45454
EXOC3L4	NC_006092.4	50182783	50209061	+	2	41	0.1086	0	2	1	40	0.107767	501	>200	0
TXNRD3	NC_006099.4	10389896	10409621	+	5	184	0.1098	0	5	6	178	0.10884	502	>200	0
SGCG	NC_006088.4	177672798	177788672	-	6	238	0.1132	0	6	4	234	0.109431	503	>200	0
SMYD3	NC_006090.4	34348843	34422597	+	4	133	0.1111	0	4	3	130	0.109753	504	111	2.54035
RCN1	NC_006092.4	5325542	5334837	+	4	134	0.1164	0	4	4	130	0.11198	505	>200	0
PLSCR5	NC_006096.4	11589502	11611360	-	6	242	0.1211	0	6	8	234	0.115915	506	>200	0
VRK1	NC_006092.4	46691972	46725680	+	7	298	0.1199	0	7	6	292	0.116181	507	>200	0
TMC2	NC_006089.4	44470537	44496992	+	1	9	0.1081	0	1	4	5	0.116327	508	>200	0
RD3	NC_006090.4	22259539	22281927	+	1	9	0.1081	0	1	4	5	0.116327	509	>200	0
CGA	NC_006090.4	76866827	76876263	+	1	9	0.1081	0	1	2	7	0.116327	510	>200	0
ENPP4	NC_006090.4	110170098	110175527	+	1	9	0.1081	0	1	0	9	0.116327	511	>200	0
TNIP3	NC_006091.4	54465643	54529673	+	1	9	0.1081	0	1	2	7	0.116327	512	>200	0
SEC24D	NC_006091.4	55275150	55328165	+	1	9	0.1081	0	1	5	4	0.116327	513	>200	0
MNAT1	NC_006092.4	54348838	54464257	-	1	9	0.1081	1	0	5	4	0.116327	514	>200	0
PPAPDC1A	NC_006093.4	30549425	30597810	+	1	9	0.1081	0	1	4	5	0.116327	515	>200	0
PPP2R2B	NC_006100.4	17986685	18056275	-	1	9	0.1081	0	1	3	6	0.116327	516	2	5.59903
LOC417131	NC_006104.4	8469016	8504082	+	1	9	0.1081	1	0	3	6	0.116327	517	>200	0
CTPS1	NC_006110.4	1283295	1296880	-	1	9	0.1081	0	1	4	5	0.116327	518	>200	0
KCNH6	NC_006114.4	2854843	2882929	+	1	9	0.1081	0	1	4	5	0.116327	519	>200	0
AGTR1	NC_006096.4	12398391	12431229	+	4	136	0.1163	0	4	2	134	0.116495	520	>200	0
BMP5	NC_006090.4	87684480	87740094	+	3	87	0.1163	1	2	8	79	0.116522	521	>200	0
N4BP1	NC_006098.4	7410707	7427406	+	3	87	0.1163	0	3	8	79	0.116522	522	>200	0
CPNE8	NC_006088.4	15507104	15601794	+	2	43	0.1141	0	2	8	35	0.116626	523	22	3.58329
AGR3	NC_006089.4	28653716	28664156	-	2	43	0.1141	0	2	1	42	0.116626	524	>200	0
PARK2	NC_006090.4	44611000	45290198	+	2	43	0.1141	0	2	4	39	0.116626	525	>200	0
LOC771474	NC_006089.4	87189722	87190507	-	5	189	0.1189	0	5	0	189	0.118208	526	>200	0
H2AFY	NC_006100.4	15502533	15547817	+	4	137	0.1212	0	4	7	130	0.118782	527	>200	0
LOC107052829	NC_006089.4	143801970	143804221	-	3	88	0.1236	0	3	0	88	0.119479	528	>200	0
KCNMA1	NC_006093.4	13362771	13804378	+	9	416	0.127	1	8	35	381	0.119623	529	5	5.04289
LOC101749375	NC_006088.4	98317089	98387949	-	5	190	0.1162	1	4	17	173	0.120126	530	>200	0
SLC4A7	NC_006089.4	38581179	38714035	-	2	44	0.1213	0	2	22	22	0.121123	531	>200	0
SNTG2	NC_006090.4	92952262	93110733	+	2	44	0.1213	1	1	11	33	0.121123	532	>200	0
ARL14EP	NC_006092.4	4538529	4546321	+	2	44	0.1213	0	2	2	42	0.121123	533	>200	0
EIF3M	NC_006092.4	5522478	5536785	+	2	44	0.1213	0	2	6	38	0.121123	534	>200	0
TTYH3	NC_006101.4	3245727	3315963	-	2	44	0.1213	0	2	15	29	0.121123	535	7	4.11246
DGKE	NC_006105.4	6336864	6365356	+	2	44	0.1213	0	2	4	40	0.121123	536	10	4.47441
INHBB	NC_006094.4	25710325	25720800	+	5	191	0.1193	0	5	7	184	0.122059	537	>200	0
LYPLAL1	NC_006090.4	19144886	19169903	-	6	246	0.1253	0	6	2	244	0.122587	538	>200	0
CDH2	NC_006089.4	105084273	105197912	-	8	361	0.1266	0	8	13	348	0.124203	539	39	2.84885
PTGFR	NC_006095.4	18793780	18815566	-	2	45	0.1245	0	2	3	42	0.125661	540	>200	0
HS3ST1	NC_006091.4	78613856	78624957	+	6	248	0.122	0	6	5	243	0.125992	541	>200	0
DIAPH1	NC_006091.4	5835394	5995140	-	12	602	0.1299	1	11	15	587	0.126332	542	>200	0
DMD	NC_006088.4	114486908	115483008	+	5	194	0.1342	0	5	55	139	0.127943	543	65	3.08535
MARCKS	NC_006090.4	65048005	65051496	-	4	141	0.123	0	4	2	139	0.128119	544	153	2.27149
RNF212	NC_006091.4	85493256	85509580	+	4	141	0.123	0	4	1	140	0.128119	545	184	2.25984
MPPED2	NC_006092.4	4579313	4682284	-	4	141	0.123	0	4	6	135	0.128119	546	3	4.36781
KIAA1715	NC_006094.4	16432141	16469780	+	4	141	0.123	0	4	7	134	0.128119	547	>200	0
CSF2RB	NC_006088.4	51594705	51607495	-	1	10	0.1326	0	1	1	9	0.128386	548	>200	0
PTK2	NC_006089.4	145815729	145935965	-	1	10	0.1326	0	1	5	5	0.128386	549	24	2.91117
OPN3	NC_006090.4	35923067	35941688	+	1	10	0.1326	0	1	2	8	0.128386	550	180	2.23988
PIGM	NC_006090.4	35981093	35983021	-	1	10	0.1326	0	1	1	9	0.128386	551	>200	0
FGF5	NC_006091.4	45638960	45644828	+	1	10	0.1326	0	1	1	9	0.128386	552	>200	0
FGF19	NC_006092.4	17561215	17566152	-	1	10	0.1326	0	1	1	9	0.128386	553	>200	0
CHST1	NC_006092.4	23991276	23995307	+	1	10	0.1326	0	1	3	7	0.128386	554	5	5.55715
DAW1	NC_006096.4	9550882	9568074	+	1	10	0.1326	1	0	1	9	0.128386	555	>200	0
UTS2B	NC_006096.4	13751036	13757813	+	1	10	0.1326	0	1	2	8	0.128386	556	>200	0
EIF4A2	NC_006096.4	16247458	16254388	+	1	10	0.1326	0	1	4	6	0.128386	557	5	5.03965
KCNIP1	NC_006100.4	3517626	3815112	-	1	10	0.1326	1	0	8	2	0.128386	558	3	4.87551
GOLPH3	NC_006127.4	9664934	9697216	-	1	10	0.1326	0	1	4	6	0.128386	559	>200	0
SLCO4C1	NC_006127.4	50256470	50283287	+	1	10	0.1326	0	1	4	6	0.128386	560	>200	0
FKTN	NC_006127.4	55042064	55061223	+	1	10	0.1326	0	1	6	4	0.128386	561	10	3.66964
LOC101748912	NC_006127.4	67262424	67270739	-	1	10	0.1326	0	1	0	10	0.128386	562	>200	0
SEMA5B	NC_006094.4	26697046	26949365	-	5	195	0.1302	0	5	27	168	0.129932	563	52	3.10544
PLXNA1	NC_006099.4	9901704	9999497	+	5	195	0.1302	0	5	11	184	0.129932	564	>200	0
TAF3	NC_006088.4	4257756	4371456	+	2	46	0.1299	0	2	8	38	0.13024	565	>200	0
ERNI	NC_006092.4	53685990	53689626	-	2	46	0.1299	0	2	0	46	0.13024	566	>200	0
ABCC4	NC_006088.4	146127039	146275424	+	4	142	0.1385	1	3	21	121	0.130501	567	>200	0
MECOM	NC_006096.4	20062888	20364546	+	7	308	0.1348	0	7	17	291	0.131354	568	>200	0
MGST1	NC_006088.4	63308935	63315673	+	3	92	0.1306	0	3	0	92	0.131575	569	>200	0
LOC101752263	NC_006089.4	93562283	93563781	+	3	92	0.1306	0	3	0	92	0.131575	570	>200	0
RBFOX1	NC_006101.4	10917592	11663646	-	8	368	0.1383	0	8	15	353	0.134086	571	3	5.36294
POT1	NC_006088.4	21741937	21804751	+	3	93	0.1338	0	3	3	90	0.134664	572	>200	0
TCF20	NC_006088.4	49300361	49425838	+	3	93	0.1338	1	2	19	74	0.134664	573	>200	0
AKIRIN2	NC_006090.4	76633230	76649721	+	2	47	0.1336	0	2	3	44	0.134856	574	>200	0
LOC107053954	NC_006095.4	9009983	9012165	+	2	47	0.1336	0	2	0	47	0.134856	575	>200	0
MAN2A1	NC_006127.4	47152077	47271357	-	2	47	0.1336	0	2	20	27	0.134856	576	>200	0
JMJD4	NC_006089.4	3250059	3259197	+	4	144	0.1351	0	4	3	141	0.135317	577	142	2.46463
DSEL	NC_006089.4	94974755	94981794	+	2	48	0.1371	0	2	14	34	0.139508	578	>200	0
PDE5A	NC_006091.4	54931896	55064894	+	2	48	0.1371	0	2	21	27	0.139508	579	>200	0
LFNG	NC_006101.4	3231456	3241840	+	2	48	0.1371	0	2	1	47	0.139508	580	>200	0
VPS13D	NC_006108.4	5362250	5451040	-	2	48	0.1371	0	2	34	14	0.139508	581	>200	0
BAI3	NC_006090.4	83539402	83990322	-	5	200	0.1384	0	5	27	173	0.140087	582	>200	0
WNT9A	NC_006089.4	2612416	2663357	+	4	146	0.1428	0	4	3	143	0.140205	583	37	3.30796
LOC418109	NC_006088.4	56691591	56709810	-	1	11	0.1406	0	1	3	8	0.140281	584	>200	0
CECR1	NC_006088.4	61725290	61744375	-	1	11	0.1406	0	1	5	6	0.140281	585	>200	0
CA3	NC_006089.4	123303858	123317308	+	1	11	0.1406	0	1	3	8	0.140281	586	>200	0
LIN9	NC_006090.4	17065164	17104451	+	1	11	0.1406	1	0	9	2	0.140281	587	>200	0
PIGF	NC_006090.4	26798936	26828323	-	1	11	0.1406	0	1	5	6	0.140281	588	>200	0
EPHX1L	NC_006090.4	30929913	30940613	+	1	11	0.1406	0	1	3	8	0.140281	589	>200	0
TBPL1	NC_006090.4	56429531	56443249	-	1	11	0.1406	0	1	7	4	0.140281	590	178	2.16626
CDC40	NC_006090.4	66787972	66824444	-	1	11	0.1406	1	0	8	3	0.140281	591	>200	0
NDUFA10	NC_006094.4	6535126	6575698	-	1	11	0.1406	0	1	1	10	0.140281	592	>200	0
NRG4	NC_006097.4	3406292	3428224	+	1	11	0.1406	0	1	1	10	0.140281	593	>200	0
LOC107054339	NC_006099.4	1081577	1082917	+	1	11	0.1406	0	1	0	11	0.140281	594	>200	0
TCERG1	NC_006100.4	17953256	17985873	+	1	11	0.1406	0	1	5	6	0.140281	595	>200	0
EMP2	NC_006101.4	9241242	9263232	+	1	11	0.1406	0	1	3	8	0.140281	596	>200	0
FZD10	NC_006102.4	3432876	3435118	-	1	11	0.1406	0	1	0	11	0.140281	597	>200	0
PLOD1	NC_006108.4	5514105	5531231	-	1	11	0.1406	1	0	11	0	0.140281	598	>200	0
DCAF7	NC_006114.4	2884255	2899988	+	1	11	0.1406	0	1	9	2	0.140281	599	21	4.05277
GNA14	NC_006127.4	37706418	37770612	-	1	11	0.1406	1	0	4	7	0.140281	600	>200	0
PPP1R3A	NC_006088.4	26361962	26388835	+	3	95	0.1397	0	3	5	90	0.140916	601	>200	0
SNX16	NC_006089.4	122059414	122083430	-	3	96	0.1431	0	3	7	89	0.144078	602	10	4.21905
ICA1	NC_006089.4	24980604	25053133	-	2	49	0.1395	0	2	6	43	0.144194	603	44	3.09933
ANKRD50	NC_006091.4	53218464	53260011	+	5	203	0.1497	0	5	16	187	0.146341	604	>200	0
EPHA7	NC_006090.4	74171502	74348598	+	8	377	0.1521	0	8	29	348	0.147359	605	6	5.09623
DHX35	NC_006107.4	3979295	4104289	+	8	378	0.1513	0	8	7	371	0.148872	606	>200	0
TMEM26	NC_006093.4	8546518	8560950	+	2	50	0.1501	0	2	5	45	0.148913	607	>200	0
GMNC	NC_006096.4	13851356	13860920	+	2	50	0.1501	0	2	3	47	0.148913	608	77	3.1346
FOXB1	NC_006097.4	5185868	5188172	-	3	98	0.1521	0	3	0	98	0.15047	609	111	2.87107
GBA3	NC_006091.4	74859830	74890792	-	10	501	0.149	0	10	3	498	0.151715	610	>200	0
LOC417800	NC_006088.4	30529790	30533660	+	1	12	0.1497	0	1	2	10	0.152014	611	>200	0
SCGN	NC_006089.4	90193004	90216126	-	1	12	0.1497	0	1	0	12	0.152014	612	>200	0
SPAST	NC_006090.4	33707199	33743398	-	1	12	0.1497	1	0	12	0	0.152014	613	54	2.96509
NUP133	NC_006090.4	40145916	40176069	-	1	12	0.1497	0	1	11	1	0.152014	614	>200	0
RTN4IP1	NC_006090.4	68272545	68292638	+	1	12	0.1497	0	1	1	11	0.152014	615	>200	0
GPR50	NC_006091.4	17675462	17701567	-	1	12	0.1497	0	1	0	12	0.152014	616	>200	0
GCH1	NC_006092.4	56470558	56487366	+	1	12	0.1497	0	1	3	9	0.152014	617	>200	0
FAM196A	NC_006093.4	33024168	33069138	-	1	12	0.1497	0	1	0	12	0.152014	618	6	5.07617
PLA2G15	NC_006098.4	117681	139029	+	1	12	0.1497	0	1	4	8	0.152014	619	>200	0
GLG1	NC_006098.4	1864836	1920181	-	1	12	0.1497	1	0	10	2	0.152014	620	27	2.87339
STC1	NC_006109.4	1150113	1158948	+	1	12	0.1497	0	1	1	11	0.152014	621	>200	0
ZPLD1	NC_006088.4	85462740	85586538	+	5	206	0.1517	2	3	8	198	0.152712	622	>200	0
SNTG1	NC_006089.4	109104501	109438731	+	2	51	0.1558	0	2	16	35	0.153662	623	2	5.89928
DHX32	NC_006093.4	32577534	32595710	-	2	51	0.1558	0	2	3	48	0.153662	624	>200	0
BNIP2	NC_006097.4	5311373	5330634	+	2	51	0.1558	0	2	7	44	0.153662	625	>200	0
GRB14	NC_006094.4	20231657	20300305	+	5	207	0.1547	0	5	8	199	0.154861	626	>200	0
ZNF516	NC_006089.4	91084619	91186992	+	9	443	0.163	0	9	19	424	0.155898	627	>200	0
LOC107052718	NC_006088.4	32606383	32609430	+	2	52	0.1692	0	2	0	52	0.158441	628	>200	0
LOC418836	NC_006088.4	166583641	166591417	-	2	52	0.1692	0	2	1	51	0.158441	629	>200	0
CNGB3	NC_006089.4	123704852	123731705	-	2	52	0.1692	0	2	3	49	0.158441	630	>200	0
PKDCCa	NC_006090.4	23381879	23416028	+	2	52	0.1692	0	2	0	52	0.158441	631	>200	0
TAB2	NC_006090.4	48165216	48238627	+	2	52	0.1692	0	2	12	40	0.158441	632	>200	0
SIX4	NC_006092.4	54464652	54475794	+	2	52	0.1692	1	1	13	39	0.158441	633	>200	0
KNDC1	NC_006093.4	21520428	21579366	-	3	101	0.1611	0	3	16	85	0.160224	634	59	3.45703
LAMA4	NC_006090.4	65863938	65961015	+	4	154	0.1668	0	4	18	136	0.160429	635	>200	0
CHL1	NC_006099.4	17238006	17346873	+	4	154	0.1668	0	4	8	146	0.160429	636	2	6.00191
CNTN5	NC_006088.4	183529156	184134946	-	5	210	0.1667	0	5	19	191	0.161383	637	3	5.29486
DPH6	NC_006092.4	31989703	32173952	+	6	268	0.1608	0	6	6	262	0.162452	638	>200	0
EDNRB	NC_006088.4	153918344	153932319	+	2	53	0.1678	0	2	3	50	0.163246	639	70	3.08527
WARS	NC_006092.4	48647751	48664190	-	2	53	0.1678	0	2	8	45	0.163246	640	>200	0
PTBP2	NC_006095.4	12953592	13000054	-	2	53	0.1678	1	1	5	48	0.163246	641	12	3.77563
IFRD1	NC_006088.4	26917108	26927701	-	1	13	0.1627	0	1	7	6	0.163587	642	>200	0
PVALB	NC_006088.4	51642252	51655238	+	1	13	0.1627	0	1	3	10	0.163587	643	>200	0
CAPRIN2	NC_006088.4	59650918	59682833	+	1	13	0.1627	0	1	11	2	0.163587	644	105	2.69502
SERTAD4	NC_006090.4	22746891	22753312	-	1	13	0.1627	0	1	0	13	0.163587	645	106	2.50034
CD24	NC_006090.4	68172467	68176409	+	1	13	0.1627	0	1	2	11	0.163587	646	49	2.74099
NXT2	NC_006091.4	13857377	13869512	-	1	13	0.1627	0	1	2	11	0.163587	647	193	2.3889
BMP3	NC_006091.4	45768799	45793318	+	1	13	0.1627	0	1	2	11	0.163587	648	16	3.7476
ADAMTS3	NC_006091.4	50805360	50937372	-	1	13	0.1627	0	1	7	6	0.163587	649	12	4.50952
PRSS12	NC_006091.4	55370328	55412064	+	1	13	0.1627	0	1	10	3	0.163587	650	40	3.54162
PAQR9	NC_006096.4	10620336	10621514	-	1	13	0.1627	1	0	1	12	0.163587	651	>200	0
CNEP1R1	NC_006098.4	6773488	6779391	-	1	13	0.1627	1	0	3	10	0.163587	652	>200	0
BEAN1	NC_006098.4	11617304	11657401	-	1	13	0.1627	1	0	5	8	0.163587	653	>200	0
LOC101750188	NC_006098.4	19255421	19262314	-	1	13	0.1627	0	1	0	13	0.163587	654	>200	0
ATOX1	NC_006100.4	12905941	12910078	+	1	13	0.1627	0	1	0	13	0.163587	655	>200	0
SCAI	NC_006104.4	10012225	10048661	+	1	13	0.1627	1	0	13	0	0.163587	656	3	5.14435
MYH13	NC_006105.4	346675	384341	-	1	13	0.1627	1	0	11	2	0.163587	657	>200	0
PSMD12	NC_006105.4	7207473	7215520	+	1	13	0.1627	1	0	8	5	0.163587	658	>200	0
ANKRD13B	NC_006106.4	6071556	6078737	+	1	13	0.1627	0	1	0	13	0.163587	659	7	4.91126
DDX27	NC_006107.4	10955978	10961936	-	1	13	0.1627	0	1	8	5	0.163587	660	>200	0
EDN3	NC_006107.4	11001554	11018975	-	1	13	0.1627	0	1	2	11	0.163587	661	>200	0
PPARGC1A	NC_006091.4	74250323	74596901	+	10	511	0.1686	0	10	21	490	0.165205	662	32	3.67254
LOC101748457	NC_006088.4	115502585	115510376	-	3	103	0.1653	0	3	0	103	0.166831	663	>200	0
ARL6	NC_006088.4	91211031	91229743	+	2	54	0.1687	0	2	2	52	0.168077	664	47	3.11903
LOC107054382	NC_006099.4	3612229	3639291	-	2	54	0.1687	0	2	0	54	0.168077	665	>200	0
CCDC50	NC_006096.4	13702087	13741863	-	3	104	0.1634	0	3	5	99	0.170163	666	>200	0
DSC2	NC_006089.4	106277435	106298893	-	5	214	0.1737	0	5	4	210	0.170246	667	>200	0
GAP43	NC_006088.4	82260395	82313641	-	4	158	0.1776	0	4	4	154	0.170918	668	2	5.50378
PCDH18	NC_006091.4	28880214	28890093	-	5	215	0.1729	0	5	9	206	0.172491	669	>200	0
LOC107055472	NC_006088.4	110571442	110575294	+	2	55	0.1694	0	2	2	53	0.172932	670	>200	0
LOC770574	NC_006089.4	6955946	6959357	-	2	55	0.1694	0	2	0	55	0.172932	671	>200	0
LOC422654	NC_006091.4	51307792	51309260	+	2	55	0.1694	0	2	0	55	0.172932	672	>200	0
GABRG2	NC_006100.4	7057299	7128648	-	2	55	0.1694	0	2	14	41	0.172932	673	1	5.93861
DIS3L2	NC_006096.4	15447935	15611897	+	3	105	0.1656	1	2	13	92	0.173515	674	>200	0
GNAT3	NC_006088.4	11261662	11291903	+	1	14	0.1766	0	1	3	11	0.175002	675	>200	0
ILDR1	NC_006088.4	83212371	83226469	-	1	14	0.1766	0	1	0	14	0.175002	676	>200	0
DENND3	NC_006089.4	146101409	146139806	+	1	14	0.1766	0	1	6	8	0.175002	677	>200	0
ARFIP1	NC_006091.4	34140471	34181242	+	1	14	0.1766	1	0	10	4	0.175002	678	>200	0
LOC107051746	NC_006091.4	44372907	44375590	+	1	14	0.1766	0	1	0	14	0.175002	679	>200	0
YIPF7	NC_006091.4	68062286	68075787	+	1	14	0.1766	0	1	2	12	0.175002	680	>200	0
PHC3	NC_006096.4	19917464	19958755	+	1	14	0.1766	1	0	14	0	0.175002	681	143	1.79594
GNB5	NC_006097.4	8866333	8887402	+	1	14	0.1766	0	1	8	6	0.175002	682	11	4.77426
IARS	NC_006099.4	3503069	3593631	+	1	14	0.1766	0	1	8	6	0.175002	683	>200	0
LOC396531	NC_006101.4	1041008	1045896	-	1	14	0.1766	0	1	2	12	0.175002	684	>200	0
ZFAND2A	NC_006101.4	2374081	2377152	-	1	14	0.1766	0	1	0	14	0.175002	685	>200	0
PEX12	NC_006106.4	4430034	4432960	+	1	14	0.1766	0	1	1	13	0.175002	686	>200	0
TRAF4	NC_006106.4	5822064	5827700	+	1	14	0.1766	0	1	3	11	0.175002	687	>200	0
ALDH1A1	NC_006127.4	35893994	35947479	-	1	14	0.1766	1	0	8	6	0.175002	688	>200	0
TRPA1	NC_006089.4	117713613	117748514	-	2	56	0.1749	0	2	18	38	0.17781	689	>200	0
PI15	NC_006089.4	118812721	118835083	+	2	56	0.1749	0	2	4	52	0.17781	690	>200	0
SLITRK3	NC_006096.4	21207328	21215320	+	2	56	0.1749	1	1	11	45	0.17781	691	2	5.6579
TFAP2B	NC_006090.4	108683092	108715937	-	6	276	0.1852	0	6	12	264	0.178173	692	>200	0
PTPRG	NC_006099.4	12750103	13127787	+	7	336	0.1816	0	7	23	313	0.178616	693	26	2.77558
ANGPT1	NC_006089.4	131784819	131949415	-	3	107	0.1871	0	3	7	100	0.180274	694	>200	0
GSC	NC_006092.4	45795959	45797259	-	3	107	0.1871	0	3	1	106	0.180274	695	>200	0
CTBP2	NC_006093.4	32279326	32389071	-	3	107	0.1871	0	3	0	107	0.180274	696	>200	0
PFKP	NC_006089.4	11416995	11458619	+	4	162	0.1844	0	4	9	153	0.181638	697	14	4.62697
GABRE	NC_006091.4	10879034	10910791	+	2	57	0.1798	0	2	6	51	0.182708	698	>200	0
LOC100857299	NC_006127.4	49468851	49470760	-	2	57	0.1798	0	2	0	57	0.182708	699	>200	0
TMEM60	NC_006088.4	12504419	12508814	+	3	108	0.1846	0	3	0	108	0.183679	700	>200	0
FAM135B	NC_006089.4	144347702	144539581	-	3	108	0.1846	0	3	15	93	0.183679	701	5	5.09495
SHOX	NC_006088.4	129773258	129781085	-	7	339	0.1857	0	7	2	337	0.184063	702	>200	0
LPHN3	NC_006091.4	48214776	48706609	+	6	280	0.1864	0	6	17	263	0.186256	703	>200	0
TXNRD1	NC_006088.4	54632771	54658954	-	1	15	0.1885	0	1	4	11	0.186261	704	>200	0
SPIC	NC_006088.4	55755823	55766132	-	1	15	0.1885	0	1	1	14	0.186261	705	>200	0
PDK3	NC_006088.4	118085667	118139548	-	1	15	0.1885	0	1	7	8	0.186261	706	>200	0
LOC100859304	NC_006088.4	149936787	149939202	-	1	15	0.1885	0	1	0	15	0.186261	707	>200	0
PI4K2B	NC_006091.4	74000079	74017970	-	1	15	0.1885	0	1	7	8	0.186261	708	>200	0
HOXD13	NC_006094.4	16389450	16391995	-	1	15	0.1885	0	1	2	13	0.186261	709	>200	0
DYNC1LI2	NC_006098.4	11508086	11536540	+	1	15	0.1885	1	0	12	3	0.186261	710	7	4.34475
LOC101749540	NC_006100.4	15157727	15160237	+	1	15	0.1885	0	1	1	14	0.186261	711	>200	0
RAI1	NC_006101.4	4873534	4934410	+	1	15	0.1885	0	1	4	11	0.186261	712	163	2.21872
ARL6IP4	NC_006102.4	5235350	5242282	-	1	15	0.1885	0	1	0	15	0.186261	713	>200	0
PRDM12	NC_006104.4	6421453	6428509	+	1	15	0.1885	0	1	2	13	0.186261	714	>200	0
RASL10B	NC_006106.4	4357515	4363388	-	1	15	0.1885	0	1	2	13	0.186261	715	6	5.45146
DERA	NC_006088.4	63141076	63194884	+	2	58	0.1865	0	2	7	51	0.187626	716	>200	0
API5	NC_006092.4	21406791	21420777	+	2	58	0.1865	0	2	5	53	0.187626	717	>200	0
ADGRD1	NC_006102.4	3062231	3191688	-	2	58	0.1865	0	2	12	46	0.187626	718	>200	0
GLI2	NC_006094.4	25930783	26109391	+	7	341	0.187	0	7	12	329	0.187732	719	>200	0
PARP12	NC_006088.4	55786703	55801602	+	3	110	0.1891	0	3	1	109	0.190541	720	>200	0
GPR39	NC_006094.4	29857599	29921978	+	2	59	0.1981	0	2	2	57	0.192562	721	74	2.84843
NOX3	NC_006090.4	50770754	50828753	-	7	346	0.2059	1	6	16	330	0.197033	722	10	4.31848
LRRIQ1	NC_006088.4	41739769	41825966	+	1	16	0.1967	0	1	9	7	0.197366	723	>200	0
CALCA	NC_006092.4	10532056	10544141	+	1	16	0.1967	0	1	6	10	0.197366	724	>200	0
C5H14ORF105	NC_006092.4	55629261	55635288	+	1	16	0.1967	0	1	0	16	0.197366	725	>200	0
FNBP1L	NC_006095.4	13889279	13941919	-	1	16	0.1967	1	0	8	8	0.197366	726	6	4.71937
NMNAT3	NC_006096.4	5959867	5981452	-	1	16	0.1967	0	1	2	14	0.197366	727	>200	0
ETFA	NC_006097.4	3297740	3327747	+	1	16	0.1967	0	1	1	15	0.197366	728	>200	0
NR13	NC_006097.4	8889124	8891224	+	1	16	0.1967	0	1	0	16	0.197366	729	>200	0
ZFAND6	NC_006097.4	12580889	12630294	-	1	16	0.1967	0	1	4	12	0.197366	730	>200	0
C11H16ORF70	NC_006098.4	2452598	2486130	+	1	16	0.1967	1	0	9	7	0.197366	731	>200	0
C11H19ORF12	NC_006098.4	8519429	8525959	-	1	16	0.1967	0	1	0	16	0.197366	732	>200	0
NR2C2	NC_006099.4	19775501	19813178	-	1	16	0.1967	1	0	12	4	0.197366	733	25	3.23832
PPP1R26	NC_006104.4	8192058	8203220	+	1	16	0.1967	0	1	0	16	0.197366	734	67	3.13575
FOXK2	NC_006105.4	3503677	3508609	-	1	16	0.1967	0	1	8	8	0.197366	735	48	2.83924
F2RL3	NC_006115.4	4269510	4277288	-	1	16	0.1967	0	1	2	14	0.197366	736	>200	0
MRPL17	NC_006127.4	9297775	9298798	-	1	16	0.1967	0	1	0	16	0.197366	737	>200	0
BACE2	NC_006088.4	108844348	108901450	+	2	60	0.1903	0	2	7	53	0.197515	738	>200	0
CYP3A4	NC_006101.4	3893076	3904532	+	4	169	0.1996	0	4	2	167	0.200905	739	>200	0
PXDN	NC_006090.4	93286544	93362530	-	3	113	0.1988	0	3	21	92	0.200951	740	>200	0
SPACA1	NC_006090.4	76487492	76506858	-	2	61	0.2078	0	2	0	61	0.202482	741	>200	0
FAM19A2	NC_006088.4	32704275	32884563	-	2	62	0.2054	0	2	9	53	0.207464	742	2	6.09658
DGKI	NC_006088.4	57491601	57699350	+	2	62	0.2054	0	2	13	49	0.207464	743	13	4.64717
SLITRK1	NC_006088.4	151209848	151217902	+	2	62	0.2054	0	2	8	54	0.207464	744	8	5.63365
SLC7A13	NC_006089.4	123199214	123205624	-	2	62	0.2054	0	2	3	59	0.207464	745	>200	0
C10ORF10	NC_006100.4	13836306	13843506	+	2	62	0.2054	0	2	1	61	0.207464	746	>200	0
EDIL3	NC_006127.4	62158947	62435276	+	2	62	0.2054	0	2	10	52	0.207464	747	19	3.74516
PRKAR2B	NC_006088.4	14466480	14549861	+	1	17	0.2095	0	1	10	7	0.20832	748	55	3.52621
LOC417691	NC_006088.4	15448324	15488300	+	1	17	0.2095	0	1	2	15	0.20832	749	>200	0
CBX3	NC_006089.4	32251937	32265781	+	1	17	0.2095	0	1	8	9	0.20832	750	>200	0
CCDC102B	NC_006089.4	94296054	94527124	-	1	17	0.2095	0	1	1	16	0.20832	751	>200	0
SLC45A4	NC_006089.4	146143258	146229200	-	1	17	0.2095	0	1	4	13	0.20832	752	>200	0
MTA3	NC_006090.4	24008161	24125091	+	1	17	0.2095	0	1	7	10	0.20832	753	>200	0
RAB32	NC_006090.4	47006788	47025936	+	1	17	0.2095	0	1	2	15	0.20832	754	>200	0
SYNJ2BP	NC_006092.4	27442866	27533164	+	1	17	0.2095	0	1	7	10	0.20832	755	>200	0
COX16	NC_006092.4	27534217	27573025	+	1	17	0.2095	0	1	2	15	0.20832	756	>200	0
ZNF839	NC_006092.4	49655625	49668446	+	1	17	0.2095	1	0	10	7	0.20832	757	>200	0
ARMC9	NC_006096.4	15251958	15308917	+	1	17	0.2095	1	0	8	9	0.20832	758	68	2.96065
MPHOSPH10	NC_006097.4	5726264	5770333	-	1	17	0.2095	0	1	2	15	0.20832	759	>200	0
APBA2	NC_006097.4	5745429	5834011	+	1	17	0.2095	0	1	12	5	0.20832	760	3	5.63314
LOC693265	NC_006099.4	855456	857341	-	1	17	0.2095	0	1	1	16	0.20832	761	>200	0
TNFSF8	NC_006104.4	3107319	3120945	-	1	17	0.2095	0	1	1	16	0.20832	762	>200	0
EPHA10	NC_006110.4	3601727	3635643	+	1	17	0.2095	0	1	1	16	0.20832	763	2	5.4376
AFF2	NC_006091.4	18250798	18433604	-	7	352	0.2082	0	7	22	330	0.208427	764	6	4.03622
NTRK3	NC_006097.4	13227881	13408049	+	6	291	0.2152	0	6	16	275	0.209184	765	1	5.59362
DIO3	NC_006092.4	49376881	49378265	+	5	231	0.2166	1	4	5	226	0.209857	766	173	2.65422
OPCML	NC_006111.4	2108704	2367528	-	5	232	0.2194	0	5	3	229	0.212275	767	1	5.67459
PRIM2	NC_006090.4	86965138	87048991	-	2	63	0.2121	0	2	1	62	0.212458	768	>200	0
LOC100857751	NC_006089.4	32178960	32180627	+	4	174	0.2116	0	4	0	174	0.215023	769	>200	0
ARRDC4	NC_006097.4	16471445	16480873	+	11	610	0.2303	0	11	5	605	0.216116	770	>200	0
PEX2	NC_006089.4	119927998	119951130	-	5	234	0.217	0	5	4	230	0.217138	771	>200	0
FAM110B	NC_006089.4	112159721	112263187	+	2	64	0.2189	1	1	6	58	0.217464	772	2	5.2613
FSTL5	NC_006091.4	22953577	23219161	-	2	64	0.2189	0	2	12	52	0.217464	773	60	3.40916
RIT2	NC_006127.4	3471900	3658110	+	2	64	0.2189	0	2	4	60	0.217464	774	2	5.27232
ETV1	NC_006089.4	27321167	27392291	-	6	295	0.2162	0	6	17	278	0.217759	775	40	3.29979
GPR123	NC_006093.4	21624320	21878962	-	3	118	0.2226	0	3	26	92	0.218583	776	>200	0
TSPAN19	NC_006088.4	41732048	41738987	-	1	18	0.2098	0	1	0	18	0.219125	777	>200	0
ANO10	NC_006089.4	41035880	41154076	+	1	18	0.2098	0	1	5	13	0.219125	778	>200	0
FAM8A1	NC_006089.4	62229684	62237414	+	1	18	0.2098	0	1	1	17	0.219125	779	105	2.73466
DROSHA	NC_006089.4	69434358	69503394	+	1	18	0.2098	1	0	17	1	0.219125	780	>200	0
F9	NC_006091.4	5049675	5062480	+	1	18	0.2098	0	1	0	18	0.219125	781	>200	0
F11	NC_006091.4	61774102	61783297	+	1	18	0.2098	0	1	3	15	0.219125	782	>200	0
LOC100859067	NC_006092.4	8292206	8307816	-	1	18	0.2098	0	1	1	17	0.219125	783	>200	0
RPS6KA5	NC_006092.4	44172722	44234823	-	1	18	0.2098	1	0	15	3	0.219125	784	>200	0
CKB	NC_006092.4	50400219	50407952	-	1	18	0.2098	1	0	7	11	0.219125	785	9	4.48742
AP2M1	NC_006096.4	15866340	15889113	+	1	18	0.2098	0	1	11	7	0.219125	786	11	5.33318
MFN1	NC_006096.4	17559904	17580666	-	1	18	0.2098	0	1	4	14	0.219125	787	>200	0
SETX	NC_006104.4	6964127	6992826	-	1	18	0.2098	0	1	4	14	0.219125	788	>200	0
MTMR12	NC_006127.4	9709263	9742498	-	1	18	0.2098	0	1	9	9	0.219125	789	>200	0
FGF12	NC_006096.4	13369310	13558599	+	3	119	0.2304	0	3	6	113	0.222147	790	8	5.2494
TNC	NC_006104.4	3145480	3212199	-	3	119	0.2304	0	3	16	103	0.222147	791	>200	0
STX2	NC_006102.4	2926591	3223484	+	2	65	0.2174	0	2	6	59	0.22248	792	>200	0
SPRY2	NC_006088.4	152670005	152675345	+	5	237	0.2229	0	5	2	235	0.224497	793	82	2.81352
CYP2D6	NC_006088.4	49442475	49451655	+	2	66	0.2353	0	2	0	66	0.227504	794	>200	0
GPC4	NC_006091.4	3789430	3853066	-	2	66	0.2353	0	2	5	61	0.227504	795	>200	0
KCNK4	NC_006092.4	55080310	55090830	+	2	66	0.2353	0	2	2	64	0.227504	796	8	5.94122
ADAM12	NC_006093.4	32619952	32801865	-	2	66	0.2353	0	2	7	59	0.227504	797	>200	0
GRM7	NC_006099.4	18900289	19125317	+	2	66	0.2353	0	2	7	59	0.227504	798	2	5.53295
LOC101750125	NC_006090.4	30485465	30513553	+	3	121	0.2392	0	3	0	121	0.229309	799	>200	0
SH2D1A	NC_006091.4	15595313	15609127	-	3	121	0.2392	0	3	0	121	0.229309	800	53	3.7039
FGFRL1	NC_006091.4	85648812	85814057	-	4	179	0.2316	0	4	8	171	0.229401	801	>200	0
ING3	NC_006088.4	23427323	23445724	-	1	19	0.2309	1	0	11	8	0.229782	802	>200	0
HOXA3	NC_006089.4	32646345	32661345	-	1	19	0.2309	0	1	5	14	0.229782	803	>200	0
LARS2	NC_006089.4	43049854	43136863	-	1	19	0.2309	0	1	8	11	0.229782	804	>200	0
GPR20	NC_006089.4	146276699	146294508	-	1	19	0.2309	0	1	5	14	0.229782	805	>200	0
GLTSCR1L	NC_006090.4	23117202	23151506	+	1	19	0.2309	0	1	0	19	0.229782	806	18	4.25365
HTR1E	NC_006090.4	76900902	76931626	-	1	19	0.2309	0	1	4	15	0.229782	807	15	4.68817
KLHL2	NC_006091.4	23969939	24030835	+	1	19	0.2309	0	1	14	5	0.229782	808	58	3.29541
DOCK1	NC_006093.4	32938346	33213551	+	1	19	0.2309	0	1	10	9	0.229782	809	>200	0
LOC101751771	NC_006094.4	22244460	22245331	-	1	19	0.2309	0	1	0	19	0.229782	810	>200	0
LOC100859862	NC_006095.4	2271506	2273547	+	1	19	0.2309	0	1	0	19	0.229782	811	>200	0
ACTL6A	NC_006096.4	17486959	17496486	-	1	19	0.2309	0	1	5	14	0.229782	812	>200	0
FAH	NC_006097.4	12567084	12577908	-	1	19	0.2309	0	1	3	16	0.229782	813	>200	0
CCNE1	NC_006098.4	8570365	8582718	+	1	19	0.2309	0	1	3	16	0.229782	814	>200	0
MMP17	NC_006102.4	2722077	2765544	-	1	19	0.2309	0	1	1	18	0.229782	815	8	5.94201
ZC3H11A	NC_006113.4	471163	486103	+	1	19	0.2309	0	1	1	18	0.229782	816	>200	0
FST	NC_006127.4	16072452	16078209	+	1	19	0.2309	0	1	5	14	0.229782	817	>200	0
PIK3C2G	NC_006088.4	63952670	64233247	+	5	240	0.2276	0	5	11	229	0.231928	818	>200	0
NCKAP5	NC_006094.4	29936250	30299719	-	4	180	0.2385	0	4	27	153	0.232305	819	145	2.3516
GPR85	NC_006088.4	26676407	26682294	+	3	122	0.237	0	3	7	115	0.232906	820	5	5.17004
ATP5G3	NC_006094.4	16713222	16716391	+	3	122	0.237	0	3	3	119	0.232906	821	>200	0
TSNARE1	NC_006089.4	147040839	147522127	-	4	181	0.2339	0	4	3	178	0.235218	822	>200	0
TBXAS1	NC_006088.4	55804334	56053922	-	3	123	0.2403	0	3	7	116	0.236513	823	>200	0
SLC15A5	NC_006088.4	63246522	63275501	-	2	68	0.2405	0	2	7	61	0.237575	824	>200	0
FLT1	NC_006088.4	175837246	175938674	+	2	68	0.2405	0	2	15	53	0.237575	825	>200	0
AGMO	NC_006089.4	27888734	28076267	-	3	124	0.2386	0	3	4	120	0.24013	826	>200	0
DICER1	NC_006092.4	45907275	45943106	-	3	124	0.2386	0	3	27	97	0.24013	827	>200	0
MBP	NC_006089.4	90781838	90887290	+	1	20	0.2449	0	1	8	12	0.240294	828	58	3.30165
RIN2	NC_006090.4	4123526	4184031	+	1	20	0.2449	0	1	9	11	0.240294	829	>200	0
ZDHHC14	NC_006090.4	51720542	51830498	+	1	20	0.2449	0	1	10	10	0.240294	830	22	3.54842
SLC2A12	NC_006090.4	56395777	56426270	+	1	20	0.2449	0	1	5	15	0.240294	831	41	2.82324
GPC3	NC_006091.4	3913355	3985843	-	1	20	0.2449	0	1	3	17	0.240294	832	>200	0
LRPAP1	NC_006091.4	82422282	82431345	+	1	20	0.2449	0	1	4	16	0.240294	833	>200	0
IPO7	NC_006092.4	9363808	9396789	-	1	20	0.2449	1	0	19	1	0.240294	834	>200	0
LOC107053950	NC_006095.4	8809526	8813767	-	1	20	0.2449	0	1	0	20	0.240294	835	>200	0
FUBP1	NC_006095.4	18948064	18993219	+	1	20	0.2449	1	0	18	2	0.240294	836	>200	0
PRKX	NC_006088.4	128155837	128211093	+	2	69	0.2356	1	1	8	61	0.242619	837	>200	0
C18ORF21	NC_006089.4	83841411	83847071	-	2	69	0.2356	0	2	1	68	0.242619	838	>200	0
TJP1	NC_006097.4	5961927	6117250	-	2	69	0.2356	1	1	27	42	0.242619	839	>200	0
TOP1	NC_006107.4	4981367	5043775	+	2	69	0.2356	0	2	3	66	0.242619	840	>200	0
FOXG1	NC_006092.4	33552043	33553929	+	3	126	0.2549	0	3	2	124	0.247391	841	2	5.48688
CBLN2	NC_006089.4	92943104	92948715	+	2	70	0.2457	0	2	7	63	0.247668	842	1	5.84648
EVA1A	NC_006090.4	111040805	111235782	-	2	70	0.2457	0	2	5	65	0.247668	843	>200	0
SOHO-1	NC_006091.4	81976917	81979176	-	2	70	0.2457	0	2	0	70	0.247668	844	>200	0
LOC101749816	NC_006088.4	1630944	1636101	+	1	21	0.2507	0	1	0	21	0.250662	845	>200	0
ADSL	NC_006088.4	50125300	50140892	-	1	21	0.2507	0	1	6	15	0.250662	846	>200	0
LOC107051465	NC_006088.4	148838314	148839811	-	1	21	0.2507	0	1	0	21	0.250662	847	>200	0
TYR	NC_006088.4	187920666	187970514	-	1	21	0.2507	0	1	4	17	0.250662	848	>200	0
LRRC32	NC_006088.4	193645829	193664980	+	1	21	0.2507	0	1	7	14	0.250662	849	>200	0
AZI2	NC_006089.4	38972066	38994447	-	1	21	0.2507	0	1	2	19	0.250662	850	>200	0
CTNNAL1	NC_006089.4	88796623	88855593	+	1	21	0.2507	0	1	9	12	0.250662	851	>200	0
KIAA1919	NC_006090.4	66360890	66371123	-	1	21	0.2507	0	1	0	21	0.250662	852	>200	0
RCAN2	NC_006090.4	110183072	110259917	-	1	21	0.2507	0	1	5	16	0.250662	853	6	4.26457
GEMIN2	NC_006092.4	37633619	37642338	+	1	21	0.2507	0	1	4	17	0.250662	854	>200	0
TDP1	NC_006092.4	43714906	43750520	+	1	21	0.2507	0	1	1	20	0.250662	855	>200	0
SAMD4A	NC_006092.4	56495199	56564807	-	1	21	0.2507	0	1	11	10	0.250662	856	>200	0
RNPC3	NC_006095.4	11044209	11059015	-	1	21	0.2507	0	1	5	16	0.250662	857	112	2.57006
PHKB	NC_006098.4	7630537	7701495	-	1	21	0.2507	0	1	12	9	0.250662	858	>200	0
FAM3D	NC_006099.4	11897271	11902097	-	1	21	0.2507	0	1	0	21	0.250662	859	>200	0
GXYLT2	NC_006099.4	16533544	16553698	+	1	21	0.2507	0	1	3	18	0.250662	860	>200	0
LRRC70	NC_006127.4	19544839	19550102	+	1	21	0.2507	0	1	15	6	0.250662	861	>200	0
LOC427259	NC_006127.4	37329741	37335981	-	1	21	0.2507	0	1	1	20	0.250662	862	>200	0
EEF1E1	NC_006089.4	64503692	64520604	+	2	71	0.2527	0	2	2	69	0.25272	863	>200	0
MDFIC	NC_006088.4	25764792	25813425	-	9	506	0.2619	0	9	7	499	0.25752	864	>200	0
KMT2E	NC_006088.4	13764678	13817455	+	2	72	0.2563	0	2	21	51	0.257774	865	50	2.44061
TNRC6B	NC_006088.4	50141099	50282098	-	2	72	0.2563	0	2	47	25	0.257774	866	151	2.13088
DPP10	NC_006094.4	29320543	29687965	-	3	129	0.263	0	3	13	116	0.258343	867	3	5.19023
BICD1	NC_006088.4	59138414	59339666	-	1	22	0.2595	0	1	18	4	0.260889	868	12	3.89096
LOC107056915	NC_006088.4	113813162	113817341	-	1	22	0.2595	0	1	0	22	0.260889	869	>200	0
NR0B1	NC_006088.4	115909222	115911511	+	1	22	0.2595	0	1	2	20	0.260889	870	>200	0
CDK13	NC_006089.4	50061935	50124188	+	1	22	0.2595	1	0	21	1	0.260889	871	>200	0
MACROD2	NC_006090.4	4595775	5391567	+	1	22	0.2595	0	1	3	19	0.260889	872	4	4.9751
SNX9	NC_006090.4	51867663	51920877	+	1	22	0.2595	0	1	10	12	0.260889	873	>200	0
DOK7	NC_006091.4	82442153	82502055	-	1	22	0.2595	0	1	8	14	0.260889	874	104	3.00247
PRRG4	NC_006092.4	5600407	5607387	+	1	22	0.2595	0	1	0	22	0.260889	875	>200	0
TMEM86A	NC_006092.4	12629042	12652885	+	1	22	0.2595	0	1	4	18	0.260889	876	>200	0
NETO2	NC_006098.4	7779800	7807752	+	1	22	0.2595	0	1	7	15	0.260889	877	1	5.63192
EDEM1	NC_006099.4	18660231	18670248	+	1	22	0.2595	0	1	1	21	0.260889	878	>200	0
GABRA6	NC_006100.4	7282000	7303586	-	1	22	0.2595	0	1	6	16	0.260889	879	35	4.67284
SAP30L	NC_006100.4	12143164	12153071	-	1	22	0.2595	0	1	2	20	0.260889	880	>200	0
LMTK2	NC_006101.4	1070583	1104180	+	1	22	0.2595	0	1	12	10	0.260889	881	5	5.38507
OFCC1	NC_006089.4	63662562	63836899	+	8	444	0.2709	0	8	8	436	0.263177	882	>200	0
GRIN2B	NC_006088.4	48480816	48697082	-	4	191	0.2639	1	3	36	155	0.264787	883	1	6.01979
LOC107053116	NC_006090.4	71974116	71975316	-	7	381	0.2653	0	7	0	381	0.26658	884	>200	0
KIF15	NC_006089.4	43342971	43379056	-	2	74	0.2733	0	2	13	61	0.267885	885	>200	0
RAPGEF2	NC_006091.4	22206766	22380496	+	2	74	0.2733	0	2	25	49	0.267885	886	5	4.03065
FOXN3	NC_006092.4	43428311	43613450	-	3	132	0.2678	0	3	22	110	0.269357	887	>200	0
GAS6	NC_006088.4	137167887	137205253	+	1	23	0.2678	0	1	7	16	0.270976	888	>200	0
SLC24A3	NC_006090.4	3972174	4108245	+	1	23	0.2678	0	1	12	11	0.270976	889	2	5.62068
IRS4	NC_006091.4	13928276	13949922	+	1	23	0.2678	0	1	3	20	0.270976	890	>200	0
GPM6A	NC_006091.4	44449547	44593482	-	1	23	0.2678	0	1	9	14	0.270976	891	1	5.81405
WDR19	NC_006091.4	69795773	69835511	-	1	23	0.2678	0	1	19	4	0.270976	892	34	2.97834
ASIC4	NC_006094.4	22205617	22226310	-	1	23	0.2678	0	1	1	22	0.270976	893	20	5.00801
SNX4	NC_006094.4	28237571	28268085	-	1	23	0.2678	0	1	12	11	0.270976	894	>200	0
LOC101751621	NC_006098.4	8446945	8463263	+	1	23	0.2678	0	1	1	22	0.270976	895	>200	0
LOC101750260	NC_006101.4	4906012	4921354	+	1	23	0.2678	0	1	11	12	0.270976	896	>200	0
POU3F3	NC_006088.4	135051171	135054413	+	10	580	0.2751	0	10	1	579	0.271818	897	6	4.81139
WT1	NC_006092.4	5439691	5471659	-	2	75	0.2669	0	2	2	73	0.27294	898	>200	0
ASTN2	NC_006104.4	3724394	3998800	-	2	75	0.2669	0	2	7	68	0.27294	899	4	5.13825
RP11-411B6.6	NC_006093.4	17416263	17419148	+	3	133	0.2745	0	3	0	133	0.27304	900	>200	0
ANKS6	NC_006089.4	88113525	88155443	-	4	194	0.2745	0	4	12	182	0.273791	901	15	3.68776
TMEM182	NC_006088.4	134124644	134148901	+	10	582	0.2785	0	10	7	575	0.275195	902	>200	0
HS6ST1	NC_006096.4	1549897	1715952	-	3	134	0.28	0	3	5	129	0.276728	903	121	2.95131
PKHD1	NC_006090.4	108087010	108305107	+	5	258	0.2855	0	5	5	253	0.277818	904	>200	0
SEMA6D	NC_006097.4	9535589	9912577	+	6	322	0.2764	0	6	21	301	0.27834	905	34	2.89535
SULT6B1	NC_006090.4	33591454	33603221	-	3	135	0.2824	0	3	2	133	0.280421	906	>200	0
ADGRL4	NC_006095.4	18585545	18660941	+	11	652	0.2798	0	11	11	641	0.280879	907	>200	0
SRPK2	NC_006088.4	13819140	13957608	-	1	24	0.2793	0	1	10	14	0.280926	908	6	4.68783
PRKRIR	NC_006088.4	193795797	193809201	+	1	24	0.2793	0	1	4	20	0.280926	909	>200	0
GAB3	NC_006091.4	14303798	14358700	-	1	24	0.2793	0	1	7	17	0.280926	910	>200	0
PDE3B	NC_006092.4	10434605	10509847	+	1	24	0.2793	0	1	12	12	0.280926	911	>200	0
SSBP3	NC_006095.4	25250764	25301485	-	1	24	0.2793	1	0	4	20	0.280926	912	7	4.38336
PER2	NC_006096.4	5500202	5541395	-	1	24	0.2793	1	0	20	4	0.280926	913	>200	0
MESDC2	NC_006097.4	12236292	12242168	+	1	24	0.2793	0	1	2	22	0.280926	914	>200	0
PITPNM2	NC_006102.4	5126360	5235002	+	1	24	0.2793	0	1	9	15	0.280926	915	7	4.66011
LGR6	NC_006113.4	398351	473948	+	1	24	0.2793	0	1	5	19	0.280926	916	>200	0
RAB3C	NC_006127.4	18071418	18215991	+	1	24	0.2793	0	1	5	19	0.280926	917	2	6.08382
SLC25A46	NC_006127.4	46823255	46837245	-	1	24	0.2793	0	1	4	20	0.280926	918	24	3.35809
SLC39A10	NC_006094.4	9595563	9682845	+	4	197	0.2854	0	4	10	187	0.282845	919	7	4.66735
CBR4	NC_006091.4	25755958	25763029	+	5	260	0.2867	0	5	4	256	0.283032	920	>200	0
SLC24A5	NC_006097.4	10039455	10047425	+	5	260	0.2867	0	5	7	253	0.283032	921	>200	0
CPZ	NC_006091.4	81756785	81791318	+	2	77	0.2852	0	2	6	71	0.283045	922	>200	0
PAPOLA	NC_006092.4	46556823	46598133	+	2	77	0.2852	0	2	21	56	0.283045	923	>200	0
GORAB	NC_006095.4	4901367	4910343	-	2	77	0.2852	0	2	3	74	0.283045	924	>200	0
DRD1	NC_006100.4	10022903	10028170	-	2	77	0.2852	0	2	7	70	0.283045	925	14	4.85471
KCNC2	NC_006088.4	37629146	37726368	-	3	137	0.2876	1	2	17	120	0.287821	926	3	5.76466
SOX21	NC_006088.4	146418582	146420739	+	3	137	0.2876	0	3	3	134	0.287821	927	>200	0
CEP44	NC_006091.4	43989124	44002719	+	3	137	0.2876	0	3	3	134	0.287821	928	>200	0
TBC1D32	NC_006090.4	61983782	62071669	+	2	78	0.2866	0	2	9	69	0.288092	929	135	2.57612
C6H10ORF137	NC_006093.4	32534287	32556455	+	2	78	0.2866	0	2	11	67	0.288092	930	>200	0
GLT1D1	NC_006102.4	3736272	3784033	-	2	78	0.2866	0	2	4	74	0.288092	931	>200	0
LRGUK	NC_006088.4	1363097	1413282	-	1	25	0.2886	0	1	1	24	0.29074	932	>200	0
TPRKB	NC_006088.4	15698689	15702690	+	1	25	0.2886	0	1	1	24	0.29074	933	>200	0
IPO8	NC_006088.4	59686329	59733105	+	1	25	0.2886	0	1	17	8	0.29074	934	>200	0
ADIPOR2	NC_006088.4	60997447	61039866	+	1	25	0.2886	0	1	8	17	0.29074	935	>200	0
HSPA13	NC_006088.4	98081909	98089517	-	1	25	0.2886	0	1	1	24	0.29074	936	>200	0
ACTR3B	NC_006089.4	6817098	6860979	+	1	25	0.2886	0	1	8	17	0.29074	937	5	5.21957
FAM65B	NC_006089.4	90423304	90516749	+	1	25	0.2886	0	1	12	13	0.29074	938	>200	0
SMPDL3A	NC_006090.4	61367736	61380319	-	1	25	0.2886	0	1	6	19	0.29074	939	>200	0
LOC107053088	NC_006090.4	66038511	66047157	-	1	25	0.2886	0	1	0	25	0.29074	940	>200	0
C5H11ORF91	NC_006092.4	6790225	6791908	+	1	25	0.2886	0	1	0	25	0.29074	941	>200	0
SYT16	NC_006092.4	53918547	54044444	-	1	25	0.2886	1	0	13	12	0.29074	942	4	5.56018
LOC101748431	NC_006092.4	53930504	53936573	+	1	25	0.2886	1	0	3	22	0.29074	943	>200	0
MAP2K4	NC_006105.4	735685	824340	+	1	25	0.2886	0	1	4	21	0.29074	944	8	5.1423
LOC107054765	NC_006106.4	5983819	6020357	-	1	25	0.2886	0	1	2	23	0.29074	945	>200	0
LOC101747587	NC_006106.4	6582476	6587009	+	1	25	0.2886	0	1	1	24	0.29074	946	>200	0
SDC3	NC_006110.4	436061	458290	-	1	25	0.2886	0	1	2	23	0.29074	947	10	3.98749
LOC107053679	NC_006093.4	17187661	17190105	-	3	138	0.2967	0	3	1	137	0.291526	948	>200	0
IDS	NC_006091.4	18130776	18163868	+	4	200	0.2956	0	4	10	190	0.291943	949	9	4.95135
MSC	NC_006089.4	117631999	117634199	-	2	79	0.3038	0	2	2	77	0.293136	950	>200	0
LOC107052830	NC_006089.4	143796718	143797731	-	2	79	0.3038	0	2	0	79	0.293136	951	>200	0
ANOS1	NC_006088.4	125695775	125820104	+	3	139	0.2947	0	3	7	132	0.295234	952	18	3.53859
ARGLU1	NC_006088.4	141031865	141042350	+	3	139	0.2947	0	3	4	135	0.295234	953	>200	0
LRP12	NC_006089.4	130597099	130649719	-	3	139	0.2947	0	3	17	122	0.295234	954	89	2.63698
CDC5L	NC_006090.4	109327138	109358894	+	4	202	0.2873	0	4	12	190	0.29803	955	>200	0
KLHL14	NC_006089.4	106913656	106974273	-	3	140	0.3059	0	3	12	128	0.298945	956	76	3.33723
TAF5L	NC_006090.4	40213280	40231001	-	1	26	0.2951	0	1	10	16	0.30042	957	>200	0
GEN1	NC_006090.4	100629397	100649818	+	1	26	0.2951	0	1	3	23	0.30042	958	>200	0
FABP2	NC_006091.4	55073379	55075824	+	1	26	0.2951	0	1	0	26	0.30042	959	>200	0
NEUROG2	NC_006091.4	57497753	57499059	+	1	26	0.2951	0	1	1	25	0.30042	960	>200	0
INF2	NC_006092.4	51563064	51601491	+	1	26	0.2951	0	1	4	22	0.30042	961	38	3.3046
PLA2G1B	NC_006102.4	9414945	9416598	+	1	26	0.2951	0	1	0	26	0.30042	962	>200	0
MAP1B	NC_006127.4	25320938	25392615	-	1	26	0.2951	1	0	19	7	0.30042	963	6	4.97937
ZDHHC21	NC_006127.4	31656696	31700920	-	1	26	0.2951	0	1	5	21	0.30042	964	12	3.1945
PTN	NC_006088.4	57724423	57794404	+	2	81	0.2999	0	2	5	76	0.303206	965	55	3.0834
FRK	NC_006090.4	64213708	64260790	+	2	81	0.2999	0	2	1	80	0.303206	966	>200	0
IMMP1L	NC_006092.4	5030988	5061789	-	2	81	0.2999	0	2	2	79	0.303206	967	>200	0
ZNF326	NC_006095.4	15000121	15021409	-	3	142	0.3155	0	3	10	132	0.306375	968	>200	0
CCDC90B	NC_006088.4	189212812	189221045	-	2	82	0.3086	0	2	1	81	0.308232	969	>200	0
FERD3L	NC_006089.4	29666630	29667971	-	2	82	0.3086	1	1	2	80	0.308232	970	>200	0
C1HXORF59	NC_006088.4	113403041	113666278	+	1	27	0.3178	0	1	3	24	0.309968	971	>200	0
PGRMC2	NC_006091.4	34696918	34707582	-	1	27	0.3178	0	1	2	25	0.309968	972	>200	0
FAM13C	NC_006093.4	586410	634006	+	1	27	0.3178	1	0	8	19	0.309968	973	3	4.67701
LOC415478	NC_006097.4	12302556	12346133	-	1	27	0.3178	0	1	6	21	0.309968	974	>200	0
FOXK1	NC_006101.4	3958498	4002079	+	1	27	0.3178	0	1	11	16	0.309968	975	>200	0
COL5A1	NC_006104.4	7910023	8039020	+	1	27	0.3178	0	1	4	23	0.309968	976	>200	0
LOC107053196	NC_006091.4	18518077	18614360	-	4	206	0.3134	0	4	3	203	0.310246	977	>200	0
LOC107057525	NC_006088.4	117491598	117498921	-	2	83	0.3042	0	2	0	83	0.313251	978	>200	0
ELP2	NC_006089.4	88712155	88744410	-	2	83	0.3042	0	2	6	77	0.313251	979	>200	0
AEBP2	NC_006088.4	64589588	64639390	+	2	84	0.3214	0	2	13	71	0.318261	980	>200	0
CTNNB1	NC_006089.4	43601037	43622660	+	2	84	0.3214	0	2	6	78	0.318261	981	>200	0
COL12A1	NC_006090.4	81087946	81189358	+	2	84	0.3214	0	2	43	41	0.318261	982	>200	0
FAM107B	NC_006088.4	7291661	7413891	-	1	28	0.3186	0	1	6	22	0.319385	983	>200	0
ATXN7L1	NC_006088.4	14018564	14128854	-	1	28	0.3186	1	0	19	9	0.319385	984	>200	0
CASR	NC_006088.4	76686629	76763949	+	1	28	0.3186	0	1	15	13	0.319385	985	>200	0
EFHC2	NC_006088.4	111056475	111115975	+	1	28	0.3186	0	1	2	26	0.319385	986	>200	0
NOX4	NC_006088.4	187793206	187903168	+	1	28	0.3186	0	1	11	17	0.319385	987	>200	0
GRM1	NC_006090.4	46789612	46969824	+	1	28	0.3186	0	1	12	16	0.319385	988	2	5.5284
ADGB	NC_006090.4	47034995	47109204	+	1	28	0.3186	0	1	1	27	0.319385	989	>200	0
RP11-215A19.2	NC_006091.4	62021985	62071062	-	1	28	0.3186	0	1	1	27	0.319385	990	>200	0
SSTR1	NC_006092.4	37394623	37395903	+	1	28	0.3186	0	1	2	26	0.319385	991	4	5.77931
SLC2A2	NC_006096.4	19787751	19795457	+	1	28	0.3186	0	1	1	27	0.319385	992	>200	0
SLC6A2	NC_006098.4	3666352	3735387	-	1	28	0.3186	0	1	12	16	0.319385	993	>200	0
ADORA2A	NC_006102.4	8521692	8553410	-	1	28	0.3186	0	1	8	20	0.319385	994	55	3.84293
COX6A1	NC_006102.4	9341599	9342867	-	1	28	0.3186	0	1	0	28	0.319385	995	>200	0
NTMT1	NC_006104.4	6106677	6110663	+	1	28	0.3186	0	1	2	26	0.319385	996	>200	0
BPTF	NC_006105.4	7070790	7117463	-	1	28	0.3186	1	0	21	7	0.319385	997	>200	0
C1ORF109	NC_006110.4	3665136	3666779	+	1	28	0.3186	0	1	0	28	0.319385	998	>200	0
CCBE1	NC_006127.4	9299906	9388832	-	1	28	0.3186	0	1	7	21	0.319385	999	>200	0
C1H3ORF38	NC_006088.4	88820532	88827793	+	2	85	0.3241	0	2	0	85	0.323263	1000	>200	0
SLC25A26	NC_006099.4	14387853	14471616	+	2	85	0.3241	0	2	3	82	0.323263	1001	>200	0
DCT	NC_006088.4	146485483	146506241	+	3	147	0.3181	0	3	2	145	0.32497	1002	>200	0
PKN2	NC_006095.4	15217321	15269443	-	5	276	0.3287	0	5	10	266	0.325306	1003	>200	0
VPS41	NC_006089.4	49443501	49552643	-	2	86	0.3325	0	2	12	74	0.328255	1004	7	4.95233
IRF4	NC_006089.4	66711386	66724634	+	2	86	0.3325	0	2	5	81	0.328255	1005	>200	0
HS6ST2	NC_006091.4	3613775	3713496	-	2	86	0.3325	0	2	3	83	0.328255	1006	4	4.0781
LSM8	NC_006088.4	24348924	24354638	-	1	29	0.324	0	1	2	27	0.328675	1007	>200	0
NDP	NC_006088.4	111184533	111204535	+	1	29	0.324	0	1	2	27	0.328675	1008	32	3.23099
KCNK2	NC_006090.4	20863683	20990422	-	1	29	0.324	0	1	8	21	0.328675	1009	4	5.56205
HHAT	NC_006090.4	22556416	22703705	-	1	29	0.324	0	1	2	27	0.328675	1010	>200	0
MBNL3	NC_006091.4	3509587	3598754	-	1	29	0.324	0	1	2	27	0.328675	1011	>200	0
SYT9	NC_006092.4	7176515	7240590	+	1	29	0.324	0	1	11	18	0.328675	1012	47	3.42715
DAAM1	NC_006092.4	54903805	54984740	-	1	29	0.324	1	0	10	19	0.328675	1013	118	2.37262
SMPD3	NC_006098.4	191687	301574	+	1	29	0.324	0	1	10	19	0.328675	1014	1	5.51478
ZFHX3	NC_006098.4	19321916	19834198	+	1	29	0.324	1	0	21	8	0.328675	1015	>200	0
CYB5D2	NC_006106.4	3177601	3181560	-	1	29	0.324	0	1	0	29	0.328675	1016	>200	0
GALNT1	NC_006089.4	84076727	84151295	-	2	87	0.3297	0	2	15	72	0.333237	1017	>200	0
CDC42BPB	NC_006092.4	49990407	50076434	-	2	87	0.3297	0	2	31	56	0.333237	1018	103	2.19727
PLEKHB2	NC_006096.4	2215876	2230098	-	2	87	0.3297	0	2	3	84	0.333237	1019	9	4.59228
FAM83F	NC_006088.4	50292236	50313226	-	1	30	0.3387	0	1	6	24	0.337837	1020	>200	0
PMCH	NC_006088.4	55426369	55427759	+	1	30	0.3387	0	1	0	30	0.337837	1021	178	2.51989
NCAM2	NC_006088.4	100721627	100978559	+	1	30	0.3387	1	0	20	10	0.337837	1022	9	4.54039
REPS2	NC_006088.4	121281603	121375646	-	1	30	0.3387	0	1	4	26	0.337837	1023	4	5.33523
SLITRK5	NC_006088.4	149395768	149401706	-	1	30	0.3387	0	1	5	25	0.337837	1024	2	5.44127
GPALPP1	NC_006088.4	167616594	167631381	+	1	30	0.3387	0	1	1	29	0.337837	1025	>200	0
MRPL3	NC_006089.4	42030777	42059071	-	1	30	0.3387	0	1	1	29	0.337837	1026	>200	0
LOC421054	NC_006089.4	100221771	100227608	+	1	30	0.3387	0	1	2	28	0.337837	1027	>200	0
PHF20L1	NC_006089.4	141806556	141854869	+	1	30	0.3387	1	0	27	3	0.337837	1028	>200	0
NDRG1	NC_006089.4	142081000	142121250	-	1	30	0.3387	0	1	9	21	0.337837	1029	>200	0
VSNL1	NC_006090.4	100515714	100592236	+	1	30	0.3387	0	1	7	23	0.337837	1030	5	5.94605
LOC107053163	NC_006090.4	102191860	102197943	-	1	30	0.3387	0	1	0	30	0.337837	1031	>200	0
POF1B	NC_006091.4	8696314	8713283	+	1	30	0.3387	0	1	0	30	0.337837	1032	>200	0
LOC772071	NC_006091.4	14255478	14293353	-	1	30	0.3387	0	1	15	15	0.337837	1033	>200	0
H2AFY2	NC_006093.4	11993693	12008730	-	1	30	0.3387	0	1	7	23	0.337837	1034	109	2.49947
LOC107054345	NC_006099.4	1002712	1005895	-	1	30	0.3387	0	1	0	30	0.337837	1035	>200	0
PLXND1	NC_006099.4	19562314	19628819	-	1	30	0.3387	0	1	6	24	0.337837	1036	>200	0
HK3	NC_006100.4	10327381	10332415	+	1	30	0.3387	0	1	0	30	0.337837	1037	>200	0
ANKFN1L	NC_006101.4	14116345	14250519	-	1	30	0.3387	0	1	8	22	0.337837	1038	>200	0
ATXN2	NC_006102.4	6177526	6227643	-	1	30	0.3387	1	0	16	14	0.337837	1039	62	2.65765
FAM49B	NC_006089.4	140575887	140672742	-	4	215	0.3366	0	4	8	207	0.337879	1040	>200	0
PRKCQ	NC_006088.4	3663976	3718876	-	2	88	0.3461	0	2	10	78	0.338208	1041	>200	0
NDC80	NC_006089.4	101458371	101477124	-	2	88	0.3461	0	2	3	85	0.338208	1042	>200	0
SIX2	NC_006090.4	25957358	25960415	-	3	151	0.3396	0	3	1	150	0.339847	1043	>200	0
SLITRK4	NC_006091.4	9938287	9947785	+	3	151	0.3396	0	3	8	143	0.339847	1044	1	6.04281
IL1RAPL2	NC_006091.4	16915784	17258399	+	3	151	0.3396	1	2	17	134	0.339847	1045	83	3.18985
SFMBT2	NC_006088.4	3928641	4037992	-	2	89	0.3483	0	2	13	76	0.343168	1046	>200	0
LOC107052717	NC_006089.4	110357172	110358999	+	2	89	0.3483	0	2	0	89	0.343168	1047	>200	0
PACRGL	NC_006091.4	75452775	75468148	-	2	89	0.3483	0	2	1	88	0.343168	1048	>200	0
EXOG	NC_006089.4	5739588	5758838	-	3	152	0.3538	0	3	3	149	0.343563	1049	173	2.24721
RUNX2	NC_006090.4	109768999	109983601	+	4	217	0.3503	0	4	14	203	0.344036	1050	>200	0
XRCC2	NC_006089.4	6793894	6814080	-	1	31	0.3446	0	1	2	29	0.346874	1051	>200	0
MURC	NC_006089.4	89047324	89060431	+	1	31	0.3446	0	1	5	26	0.346874	1052	>200	0
YIPF4	NC_006090.4	31750562	31764070	-	1	31	0.3446	0	1	6	25	0.346874	1053	>200	0
HTR1B	NC_006090.4	80361095	80364161	+	1	31	0.3446	0	1	4	27	0.346874	1054	21	4.32453
IMPG1	NC_006090.4	80678617	80735783	+	1	31	0.3446	0	1	7	24	0.346874	1055	>200	0
JADE1	NC_006091.4	34805050	34855580	+	1	31	0.3446	0	1	7	24	0.346874	1056	>200	0
EXOC5	NC_006092.4	55709356	55735802	+	1	31	0.3446	0	1	17	14	0.346874	1057	>200	0
CYP26C1	NC_006093.4	20560272	20567872	-	1	31	0.3446	0	1	3	28	0.346874	1058	>200	0
ZNF148	NC_006094.4	28189792	28223918	-	1	31	0.3446	0	1	13	18	0.346874	1059	>200	0
FAM168B	NC_006096.4	2246077	2266258	+	1	31	0.3446	1	0	10	21	0.346874	1060	11	3.89021
HSBP1	NC_006098.4	16857454	16859283	-	1	31	0.3446	0	1	1	30	0.346874	1061	19	4.22182
ZNF346	NC_006100.4	10272901	10281879	-	1	31	0.3446	0	1	6	25	0.346874	1062	>200	0
NOG2	NC_006101.4	14084509	14085132	-	1	31	0.3446	0	1	0	31	0.346874	1063	>200	0
IER5L	NC_006104.4	6003114	6004832	-	1	31	0.3446	0	1	0	31	0.346874	1064	>200	0
NXPH1	NC_006089.4	25115672	25278218	+	4	218	0.3438	0	4	7	211	0.347115	1065	2	5.81276
TGFB2	NC_006090.4	19369482	19432348	-	3	153	0.3479	0	3	9	144	0.347277	1066	>200	0
BARHL2	NC_006095.4	14758796	14761805	+	3	153	0.3479	0	3	2	151	0.347277	1067	10	4.50595
TTC8	NC_006092.4	43302292	43338860	+	2	90	0.3488	0	2	4	86	0.348116	1068	39	2.99413
ARC	NC_006089.4	148121849	148128197	-	2	91	0.356	0	2	6	85	0.35305	1069	13	4.48768
UBE2E2	NC_006089.4	36995808	37208587	+	3	155	0.3661	0	3	6	149	0.354699	1070	7	4.60507
C2CD5	NC_006088.4	66555293	66624177	+	1	32	0.3628	1	0	23	9	0.355788	1071	47	2.74003
TRPC4	NC_006088.4	171798633	171936312	+	1	32	0.3628	0	1	14	18	0.355788	1072	2	5.7187
C11ORF30	NC_006088.4	193747151	193786712	-	1	32	0.3628	0	1	20	12	0.355788	1073	>200	0
LOC101749664	NC_006089.4	94599012	94614571	+	1	32	0.3628	0	1	10	22	0.355788	1074	>200	0
UBXN2B	NC_006089.4	112345277	112362321	+	1	32	0.3628	0	1	4	28	0.355788	1075	5	4.68469
ARAP2	NC_006091.4	70638973	70772169	+	1	32	0.3628	0	1	17	15	0.355788	1076	>200	0
EMX2	NC_006093.4	29303384	29310042	+	1	32	0.3628	0	1	3	29	0.355788	1077	184	2.35873
CDC7	NC_006095.4	14544143	14561175	-	1	32	0.3628	0	1	2	30	0.355788	1078	>200	0
KIAA0355	NC_006098.4	11031907	11085494	-	1	32	0.3628	1	0	19	13	0.355788	1079	62	2.26105
TRPC7	NC_006100.4	15053808	15120185	+	1	32	0.3628	0	1	10	22	0.355788	1080	20	4.55439
LOC107054845	NC_006107.4	11183654	11247655	-	1	32	0.3628	0	1	2	30	0.355788	1081	>200	0
TREM-B2	NC_006113.4	4755477	4761898	-	1	32	0.3628	0	1	0	32	0.355788	1082	>200	0
CPAMD8	NC_006115.4	4229276	4268190	+	1	32	0.3628	0	1	16	16	0.355788	1083	>200	0
ZNF770	NC_006092.4	32201669	32210703	+	2	92	0.3554	0	2	3	89	0.357972	1084	>200	0
ALPI	NC_006096.4	15612001	15615923	+	2	92	0.3554	0	2	0	92	0.357972	1085	>200	0
PANK3	NC_006100.4	4682776	4705165	+	2	92	0.3554	0	2	3	89	0.357972	1086	>200	0
LOC107052670	NC_006089.4	87678793	87680282	-	5	290	0.3633	0	5	0	290	0.362801	1087	>200	0
THAP5	NC_006088.4	28446232	28452655	+	2	93	0.3573	0	2	1	92	0.36288	1088	>200	0
CXXC4	NC_006091.4	39260371	39263054	+	2	93	0.3573	0	2	1	92	0.36288	1089	14	3.93996
DNAJC24	NC_006092.4	4997990	5029807	+	2	93	0.3573	0	2	0	93	0.36288	1090	>200	0
SYT4	NC_006127.4	3410683	3422038	+	2	93	0.3573	0	2	6	87	0.36288	1091	4	5.13032
KDM7A	NC_006088.4	56728354	56787603	-	1	33	0.3495	0	1	24	9	0.364581	1092	>200	0
VIPR2	NC_006089.4	9667074	9717822	-	1	33	0.3495	0	1	7	26	0.364581	1093	183	2.35146
HADH	NC_006091.4	38219461	38236386	-	1	33	0.3495	0	1	4	29	0.364581	1094	>200	0
FBLN5	NC_006092.4	44523932	44565644	-	1	33	0.3495	0	1	11	22	0.364581	1095	>200	0
MB21D2	NC_006096.4	13300089	13350795	+	1	33	0.3495	0	1	9	24	0.364581	1096	12	4.27901
FTO	NC_006098.4	4752494	4974736	-	1	33	0.3495	0	1	5	28	0.364581	1097	7	4.60974
GPI	NC_006098.4	11103504	11124331	+	1	33	0.3495	0	1	4	29	0.364581	1098	>200	0
KDM4A	NC_006095.4	20225188	20249048	+	4	224	0.3754	0	4	16	208	0.365592	1099	>200	0
C5H15ORF41	NC_006092.4	31454000	31569431	-	7	427	0.3688	0	7	9	418	0.365734	1100	>200	0
VEGFA	NC_006090.4	30739147	30759022	-	3	158	0.3677	0	3	6	152	0.365811	1101	>200	0
ASCL1	NC_006088.4	55116730	55118741	-	2	94	0.3696	0	2	2	92	0.367773	1102	39	3.47767
ADCYAP1	NC_006089.4	102121743	102124573	-	2	94	0.3696	0	2	1	93	0.367773	1103	17	4.80052
SULT1E1	NC_006091.4	52140103	52142019	-	4	225	0.3707	0	4	0	225	0.36867	1104	>200	0
USP6NL	NC_006088.4	6033346	6143958	-	3	159	0.3651	1	2	11	148	0.369508	1105	>200	0
PACRG	NC_006090.4	44418810	44610987	-	3	159	0.3651	0	3	4	155	0.369508	1106	>200	0
SPRED1	NC_006092.4	30750697	30805932	-	4	226	0.3778	0	4	10	216	0.371747	1107	12	3.47411
DLK1	NC_006092.4	49020993	49030608	+	4	226	0.3778	0	4	3	223	0.371747	1108	>200	0
MAN1A1	NC_006090.4	62648660	62793519	+	2	95	0.3695	0	2	9	86	0.372652	1109	>200	0
DMXL2	NC_006097.4	9257966	9308197	-	2	95	0.3695	0	2	41	54	0.372652	1110	14	4.84981
HELB	NC_006088.4	34415721	34429813	+	1	34	0.3808	0	1	1	33	0.373253	1111	>200	0
SIVA1	NC_006092.4	51660596	51662558	+	1	34	0.3808	0	1	0	34	0.373253	1112	>200	0
ACTR3	NC_006094.4	29764242	29789793	-	1	34	0.3808	0	1	10	24	0.373253	1113	>200	0
TMEM163	NC_006094.4	30492170	30574102	-	1	34	0.3808	0	1	8	26	0.373253	1114	116	2.7923
DARS	NC_006094.4	30835170	30871179	-	1	34	0.3808	0	1	8	26	0.373253	1115	>200	0
WTIP	NC_006098.4	11176240	11257528	-	1	34	0.3808	0	1	7	27	0.373253	1116	>200	0
NFAT5	NC_006098.4	19212134	19277188	+	1	34	0.3808	0	1	19	15	0.373253	1117	>200	0
SREK1IP1	NC_006127.4	20201161	20211718	-	1	34	0.3808	0	1	3	31	0.373253	1118	>200	0
TPPP2	NC_006127.4	44121753	44122743	-	1	34	0.3808	0	1	0	34	0.373253	1119	>200	0
COL8A1	NC_006088.4	84257313	84344104	-	2	96	0.3792	0	2	3	93	0.377515	1120	>200	0
HSF2	NC_006090.4	61487545	61508793	-	2	96	0.3792	0	2	5	91	0.377515	1121	>200	0
LOC107051474	NC_006088.4	148554069	148554828	-	1	35	0.3807	0	1	0	35	0.381808	1122	>200	0
BIRC2	NC_006088.4	182634266	182644438	-	1	35	0.3807	0	1	5	30	0.381808	1123	>200	0
CAP2	NC_006089.4	62160463	62227249	+	1	35	0.3807	0	1	11	24	0.381808	1124	12	4.50165
PLEKHH2	NC_006090.4	25206248	25258978	+	1	35	0.3807	0	1	22	13	0.381808	1125	>200	0
TNFAIP3	NC_006090.4	54748675	54763971	-	1	35	0.3807	0	1	6	29	0.381808	1126	>200	0
HS1BP3	NC_006090.4	102319461	102366308	-	1	35	0.3807	0	1	5	30	0.381808	1127	>200	0
GDF7	NC_006090.4	102375914	102382443	+	1	35	0.3807	0	1	1	34	0.381808	1128	>200	0
TBC1D8B	NC_006091.4	17438737	17472632	+	1	35	0.3807	0	1	11	24	0.381808	1129	>200	0
EIF4G2	NC_006092.4	8752708	8763946	+	1	35	0.3807	0	1	17	18	0.381808	1130	>200	0
BARD1	NC_006094.4	4211637	4254722	-	1	35	0.3807	0	1	3	32	0.381808	1131	>200	0
ATP6V1G3	NC_006095.4	2118620	2129673	+	1	35	0.3807	0	1	0	35	0.381808	1132	>200	0
HMCN1	NC_006095.4	10118544	10310697	-	1	35	0.3807	0	1	27	8	0.381808	1133	>200	0
CNOT6	NC_006100.4	13848781	13878449	-	1	35	0.3807	0	1	17	18	0.381808	1134	>200	0
ATP2A3	NC_006106.4	3247289	3283999	+	1	35	0.3807	0	1	6	29	0.381808	1135	>200	0
ELAVL2	NC_006127.4	67419195	67504218	-	1	35	0.3807	0	1	9	26	0.381808	1136	2	5.15482
TET2	NC_006091.4	39082614	39153103	-	2	97	0.3783	0	2	29	68	0.382363	1137	>200	0
DACT1	NC_006092.4	55224942	55241595	-	2	97	0.3783	0	2	11	86	0.382363	1138	83	2.65595
EPHA5	NC_006091.4	51395111	51596984	-	3	163	0.3864	0	3	16	147	0.384252	1139	2	5.69476
QKI	NC_006090.4	44231755	44374728	-	5	299	0.39	0	5	17	282	0.386971	1140	29	3.20671
STAB2	NC_006088.4	54819376	54895220	-	2	98	0.389	0	2	8	90	0.387194	1141	>200	0
SAMSN1	NC_006088.4	98116749	98151387	-	2	98	0.389	0	2	2	96	0.387194	1142	>200	0
LOC107052691	NC_006089.4	97950069	98126597	+	2	98	0.389	0	2	5	93	0.387194	1143	>200	0
MMS22L	NC_006090.4	72689090	72777286	+	7	437	0.3827	0	7	7	430	0.3878	1144	>200	0
FAM49A	NC_006090.4	100023059	100077108	-	3	164	0.3841	0	3	7	157	0.387926	1145	1	5.82181
HAND2	NC_006091.4	43676569	43677709	-	3	164	0.3841	0	3	1	163	0.387926	1146	>200	0
BTBD6	NC_006092.4	52830351	52833789	+	4	232	0.4018	0	4	3	229	0.390178	1147	10	4.64198
TRIM32	NC_006104.4	3815719	3822748	+	4	232	0.4018	0	4	8	224	0.390178	1148	4	5.61366
CD247	NC_006088.4	91603992	91650630	+	1	36	0.3812	0	1	0	36	0.390245	1149	>200	0
GDAP1	NC_006089.4	118637159	118644509	+	1	36	0.3812	0	1	3	33	0.390245	1150	5	4.8208
SOCS5	NC_006090.4	26883700	26915833	+	1	36	0.3812	0	1	11	25	0.390245	1151	7	4.88913
PASD1	NC_006091.4	17473676	17562886	-	1	36	0.3812	0	1	9	27	0.390245	1152	>200	0
TMEM144	NC_006091.4	21936057	21952314	+	1	36	0.3812	0	1	3	33	0.390245	1153	89	3.22754
ENPP6	NC_006091.4	39855557	39885178	+	1	36	0.3812	1	0	4	32	0.390245	1154	>200	0
PRRX1	NC_006095.4	4846506	4880976	-	1	36	0.3812	0	1	5	31	0.390245	1155	>200	0
OSTN	NC_006096.4	13760518	13772571	-	1	36	0.3812	0	1	1	35	0.390245	1156	>200	0
CHSY1	NC_006097.4	17568446	17630250	-	1	36	0.3812	0	1	0	36	0.390245	1157	>200	0
AKTIP	NC_006098.4	5077169	5100538	+	1	36	0.3812	0	1	5	31	0.390245	1158	15	3.70298
GFRA2	NC_006109.4	1423301	1444213	+	1	36	0.3812	0	1	0	36	0.390245	1159	13	4.67612
ST18	NC_006089.4	109910068	109977941	-	3	165	0.3899	0	3	19	146	0.391595	1160	97	2.7512
COLEC11	NC_006090.4	94108351	94145564	+	3	165	0.3899	0	3	4	161	0.391595	1161	>200	0
CDH12	NC_006089.4	73398953	73617480	+	2	99	0.3994	0	2	15	84	0.392008	1162	5	5.71446
LOC771456	NC_006094.4	31367045	31388345	+	2	99	0.3994	0	2	1	98	0.392008	1163	>200	0
GPC6	NC_006088.4	146513833	147264247	-	4	233	0.3851	0	4	22	211	0.393243	1164	>200	0
GPC5	NC_006088.4	147386374	148025614	-	2	100	0.3943	0	2	6	94	0.396805	1165	20	4.09899
YAP1	NC_006088.4	182684536	182765071	-	1	37	0.3918	0	1	5	32	0.398567	1166	>200	0
NPVF	NC_006089.4	31857592	31861159	-	3	167	0.407	0	3	1	166	0.398915	1167	31	3.25402
FAM38B	NC_006089.4	98155485	98254400	+	2	102	0.4058	0	2	36	66	0.406346	1168	>200	0
NOG	NC_006105.4	6262764	6263435	+	2	102	0.4058	0	2	0	102	0.406346	1169	49	3.2462
EP300	NC_006088.4	49812831	49870597	-	1	38	0.4055	1	0	30	8	0.406776	1170	>200	0
DPT	NC_006088.4	83908125	83937704	+	1	38	0.4055	0	1	2	36	0.406776	1171	>200	0
MMAA	NC_006091.4	31433896	31496556	+	1	38	0.4055	0	1	6	32	0.406776	1172	>200	0
CCDC149	NC_006091.4	74104391	74154994	+	1	38	0.4055	0	1	5	33	0.406776	1173	6	5.05949
GALNT10	NC_006100.4	12155886	12237685	-	1	38	0.4055	0	1	13	25	0.406776	1174	>200	0
CANT1	NC_006105.4	9843831	9852251	+	1	38	0.4055	0	1	2	36	0.406776	1175	>200	0
LOC422264	NC_006091.4	6600434	7056119	-	9	588	0.4217	0	9	21	567	0.410859	1176	>200	0
EPAS1	NC_006090.4	26625940	26703017	+	2	103	0.4024	1	1	12	91	0.411089	1177	>200	0
GJA1	NC_006090.4	61930611	61938109	-	2	103	0.4024	0	2	7	96	0.411089	1178	>200	0
GPR65	NC_006092.4	42937157	42951756	+	2	103	0.4024	0	2	3	100	0.411089	1179	>200	0
GLI3	NC_006089.4	50871503	51083128	-	4	239	0.413	1	3	21	218	0.411577	1180	>200	0
DSCAM	NC_006088.4	108235671	108689330	-	3	171	0.413	0	3	19	152	0.413479	1181	4	5.65721
LOC100858205	NC_006089.4	135959221	136122774	-	3	171	0.413	0	3	6	165	0.413479	1182	>200	0
LOC100859265	NC_006088.4	82479069	82955894	+	6	379	0.4192	0	6	40	339	0.414432	1183	>200	0
ATP1B1	NC_006088.4	83773420	83787119	-	1	39	0.4145	0	1	2	37	0.414873	1184	2	5.49347
RASA3	NC_006088.4	137003372	137134236	+	1	39	0.4145	0	1	19	20	0.414873	1185	>200	0
ADCY2	NC_006089.4	79497671	79702706	-	1	39	0.4145	0	1	21	18	0.414873	1186	7	5.43476
ASPH	NC_006089.4	113644946	113776438	-	1	39	0.4145	0	1	12	27	0.414873	1187	>200	0
EML4	NC_006090.4	23652832	23806438	+	1	39	0.4145	0	1	1	38	0.414873	1188	>200	0
AKAP12	NC_006090.4	48963805	48995118	+	1	39	0.4145	0	1	10	29	0.414873	1189	>200	0
DDX1	NC_006090.4	99391118	99412379	+	1	39	0.4145	0	1	8	31	0.414873	1190	>200	0
AADAT	NC_006091.4	25423872	25438959	+	1	39	0.4145	0	1	1	38	0.414873	1191	181	1.9179
PPP2R5C	NC_006092.4	49433706	49510107	+	1	39	0.4145	0	1	17	22	0.414873	1192	>200	0
ENPP7	NC_006105.4	9729982	9734966	-	1	39	0.4145	0	1	0	39	0.414873	1193	>200	0
LZTS1	NC_006109.4	1588003	1600640	+	1	39	0.4145	0	1	3	36	0.414873	1194	12	4.97349
MAGI2	NC_006088.4	11695397	12420711	+	3	172	0.4171	0	3	28	144	0.417102	1195	4	5.08417
EFTUD1	NC_006097.4	11665567	11721618	+	2	105	0.4212	0	2	14	91	0.420518	1196	>200	0
AGPAT4	NC_006090.4	45311361	45382160	+	3	173	0.4131	0	3	6	167	0.420719	1197	17	4.0976
ANO6	NC_006088.4	30599431	30669824	+	1	40	0.4203	0	1	14	26	0.422859	1198	>200	0
STS	NC_006088.4	126395736	126513898	-	1	40	0.4203	1	0	6	34	0.422859	1199	>200	0
CLVS2	NC_006090.4	61249610	61307554	-	1	40	0.4203	0	1	9	31	0.422859	1200	2	5.67511
HDAC4	NC_006094.4	6185003	6415782	-	1	40	0.4203	0	1	13	27	0.422859	1201	>200	0
AHSG	NC_006096.4	16183716	16190209	+	1	40	0.4203	0	1	1	39	0.422859	1202	>200	0
LMCD1	NC_006099.4	19267452	19291085	+	1	40	0.4203	0	1	0	40	0.422859	1203	>200	0
NPY6R	NC_006100.4	14477823	14491129	-	1	40	0.4203	0	1	1	39	0.422859	1204	>200	0
HCN1	NC_006127.4	14408384	14603945	-	1	40	0.4203	0	1	8	32	0.422859	1205	4	5.13184
AHR	NC_006089.4	28818151	28878615	+	2	106	0.4177	0	2	14	92	0.425203	1206	>200	0
DDX18	NC_006094.4	29074821	29083241	-	2	106	0.4177	0	2	6	100	0.425203	1207	>200	0
SLIT3	NC_006100.4	4204218	4678762	+	2	106	0.4177	0	2	14	92	0.425203	1208	>200	0
AHRR	NC_006089.4	89273920	89363848	-	1	41	0.4292	0	1	7	34	0.430737	1209	>200	0
SMAD1	NC_006091.4	31369144	31416949	+	1	41	0.4292	0	1	10	31	0.430737	1210	>200	0
CAMK2D	NC_006091.4	56906958	57067977	+	1	41	0.4292	0	1	12	29	0.430737	1211	24	3.41262
PRMT3	NC_006092.4	2086345	2142391	+	1	41	0.4292	0	1	3	38	0.430737	1212	>200	0
C14ORF1	NC_006092.4	38371233	38372899	-	1	41	0.4292	0	1	1	40	0.430737	1213	>200	0
SETD3	NC_006092.4	48029936	48083014	-	1	41	0.4292	0	1	7	34	0.430737	1214	>200	0
RHOBTB1	NC_006093.4	8661416	8711843	+	1	41	0.4292	0	1	6	35	0.430737	1215	>200	0
CLSTN2	NC_006096.4	6087167	6387796	+	1	41	0.4292	0	1	9	32	0.430737	1216	8	5.27465
GNA12	NC_006101.4	3378378	3417506	-	1	41	0.4292	0	1	9	32	0.430737	1217	>200	0
SFSWAP	NC_006102.4	2792492	2832182	-	1	41	0.4292	0	1	15	26	0.430737	1218	95	2.61341
LOC769242	NC_006105.4	2211997	2219761	+	1	41	0.4292	0	1	1	40	0.430737	1219	>200	0
ADAMTSL1	NC_006127.4	33118061	33550669	+	1	41	0.4292	0	1	16	25	0.430737	1220	>200	0
MEIS2	NC_006092.4	31240705	31409368	+	7	457	0.4317	0	7	12	445	0.431923	1221	9	3.92238
ONECUT1	NC_006115.4	2300807	2322036	-	4	246	0.4272	1	3	8	238	0.432812	1222	>200	0
LOC419035	NC_006088.4	6869305	7226605	-	2	108	0.4377	0	2	18	90	0.434513	1223	>200	0
GRM8	NC_006088.4	20922609	21247223	+	2	108	0.4377	0	2	16	92	0.434513	1224	3	5.30287
LINGO1	NC_006097.4	2667332	2767939	+	2	108	0.4377	0	2	5	103	0.434513	1225	6	5.90614
ADAMTSL3	NC_006097.4	11478738	11657198	+	2	108	0.4377	0	2	17	91	0.434513	1226	>200	0
FAM155A	NC_006088.4	140328268	140782962	+	3	177	0.435	0	3	18	159	0.435106	1227	2	5.44027
CRIM1	NC_006090.4	32364400	32528074	-	3	177	0.435	0	3	14	163	0.435106	1228	105	2.32917
NELL2	NC_006088.4	30341808	30485232	-	1	42	0.4352	0	1	10	32	0.438506	1229	6	5.76675
MYBPC1	NC_006088.4	55651369	55723422	-	1	42	0.4352	0	1	17	25	0.438506	1230	>200	0
LOC418414	NC_006088.4	87811110	87820729	+	1	42	0.4352	0	1	1	41	0.438506	1231	>200	0
RAB38	NC_006088.4	188343179	188387658	+	1	42	0.4352	0	1	3	39	0.438506	1232	>200	0
TPO	NC_006090.4	93141650	93174882	+	1	42	0.4352	0	1	7	35	0.438506	1233	>200	0
IFT43	NC_006092.4	38519045	38563646	+	1	42	0.4352	0	1	1	41	0.438506	1234	>200	0
SLC38A6	NC_006092.4	54301649	54341042	-	1	42	0.4352	0	1	4	38	0.438506	1235	>200	0
TGFBR3	NC_006095.4	14391877	14498728	+	1	42	0.4352	0	1	11	31	0.438506	1236	>200	0
NTN1	NC_006105.4	2084169	2131749	+	1	42	0.4352	0	1	2	40	0.438506	1237	>200	0
PDE4D	NC_006127.4	18249855	18787778	-	1	42	0.4352	0	1	19	23	0.438506	1238	14	4.17506
PTP4A3	NC_006089.4	146359900	146404813	-	3	178	0.4466	0	3	3	175	0.438682	1239	>200	0
[truncated: 14,303 more rows]

## Sheet: Hummingbird
Gene	Chromosome	Start	End	Strand	AR	CE	Q-score	Exonic AR	Noncoding AR	Exonic CE	Noncoding CE	Hypergeometric	Rank	ARCHS Vocalization Behavior Rank	ARCHS Vocalization Behavior Z-Score
[truncated: 15,542 more rows]

[truncated: 4 more sheets: Mallard, Core Waterbirds, Killdeer, American Flamingo]
