# Supplementary material for: Positive selection in noncoding genomic regions of vocal learning birds is associated with genes implicated in vocal learning and speech functions in humans
Source: HighWire-hosted journal article supplement (doi:10.1101/gr.275989.121), 2021-10-19
Supplement: Supplemental_Table_S5.xlsx [file Supplemental_Table_S5.xlsx]

## Sheet: Sheet1
Supplemental Table S5: Uncorrected p-values for each oscine songbird tested individually for acceleration using phyloP -CONACC (Pollard et al. 2006; Hubisz et al. 2011). Support for conservation is indicated as negative p-values.
Chromosome	Start	End	White Throated Sparrow	Medium Ground Finch	Zebra Finch	Collared Flycatcher	Tibetan Ground Tit	American Crow	Satin Bowerbird
1	364404	364631	0.99999	0	0	0	0	0	-0.07029
1	992401	992563	0	-0.44552	-0.17189	0.38972	-0.08774	0.24871	-0.70531
1	1198373	1198512	0.99999	-0.01242	-0.37519	0.99999	-0.24944	0.28745	-0.07904
1	1812651	1812758	-0.00066	-0.07317	-0.00236	0	-0.00905	1	-0.00143
1	3920147	3920273	-0.00212	-0.0021	-0.00111	-0.05537	-0.51763	-0.06307	-0.40801
1	4589358	4589458	-0.025	-0.0016	-0.22471	-0.0004	-0.0615	-0.34186	-0.05218
1	5009180	5009282	-5e-05	-8e-05	-0.00379	-0.02199	0	-0.19027	-0.15645
1	5058480	5058797	-0.01962	-0.00015	-0.01625	-2e-05	-0.00069	-0.00344	-0.04872
1	5115920	5116123	-0.68324	0.66542	-0.46713	-0.01733	-0.00627	-0.01975	0.85683
1	5188938	5189064	-0.08401	-0.00235	-0.00098	-0.41448	-0.29842	-0.97354	-0.05034
1	5420896	5421082	-0.86436	-0.846	-0.00085	-0.03087	-0.17804	0.43147	0.45559
1	5704312	5704597	0.77787	0.05116	-0.0564	-0.20737	-0.10724	-0.06846	-0.30226
1	5706840	5707135	-0.00035	-0.06459	-0.18962	-0.01078	-0.08479	-0.01756	-0.02807
1	6759088	6759219	-0.10345	-0.00187	-0.06746	-0.2114	-0.00298	0.78105	-0.00666
1	7319062	7319245	-0.01193	-0.00979	-0.04462	-0.00116	-3e-05	-0.36678	-0.2511
1	7645945	7646126	-0.00367	-0.00123	-1e-05	-0.01956	-0.00781	-0.1889	-0.00637
1	8615831	8616070	-0.00555	-0.0316	-0.05907	-0.00154	-0.00051	-0.03962	-0.03106
1	8629272	8629443	0.06591	-0.54253	-0.039	0.98118	-0.34568	-0.02831	-0.33843
1	9351659	9351789	-0.09617	-0.00368	-0.00187	-0.01733	0	-0.01808	-0.00128
1	9507276	9507464	-0.01681	-0.08516	-0.05602	-0.34084	-0.008	0.37136	-0.78492
1	10134055	10134156	-0.00137	-0.02169	-0.00515	-0.19493	-0.16202	-0.11654	-0.75904
1	10666407	10666524	-0.11763	0.84626	-0.00936	-0.17779	-0.04334	0.44003	-0.02808
1	10678881	10679029	-0.11135	-0.11533	-0.0184	-0.23517	-0.07712	-3e-05	-0.04742
1	10898770	10898970	-0.00047	-0.00012	-0.00025	-1e-05	-0.00028	-0.02047	-0.22393
1	11132022	11132193	-0.0749	-0.03073	-0.00183	-0.00287	-0.00172	-0.00944	-0.18432
1	11452031	11452168	-0.00083	-0.00366	-0.01037	-0.02479	-7e-05	-0.05221	-0.00086
1	11837040	11837171	-9e-05	-0.20277	-0.0003	-0.03255	-0.05249	-0.6797	-0.21454
1	11994544	11994732	-7e-05	0	-0.00239	-0.05553	-0.00379	-0.0024	-0.96614
1	12249029	12249177	-0.08235	-0.09794	-7e-05	-0.26114	-0.10242	-0.00403	-0.02196
1	13436867	13437025	0	-2e-05	0	0	-1e-05	-4e-05	-0.00972
1	13505350	13505521	-0.05746	-0.11709	0	-0.16679	-0.04086	-0.04837	-0.00271
1	13801905	13802122	-0.05621	-0.12629	-0.17144	-0.29627	-0.12259	-0.0138	-0.2557
1	14479911	14480012	-0.00578	-0.05957	-0.45181	-0.0061	-0.00863	-0.16977	-0.09044
1	14808357	14808490	-0.14372	-0.15203	-0.0201	-0.00154	-0.04819	0.68969	0.76656
1	15454085	15454190	-0.16013	-0.18452	-0.01153	-0.05231	-0.03521	0.4357	-0.05468
1	15492634	15492737	-0.28569	-0.78056	-0.06443	-0.01157	-0.0009	-0.03654	-0.68939
1	15649273	15649431	-0.00333	0	-2e-05	-0.00191	-0.00345	-0.01129	-0.01872
1	16099141	16099368	-0.00797	-0.00516	-2e-05	-0.05496	-0.00025	-0.40693	-0.93089
1	16504234	16504418	-0.00561	-7e-05	-0.00179	-0.04994	-0.15893	-0.02319	-0.59914
1	17055453	17055643	-0.00614	-0.00064	-6e-05	-7e-05	-0.00064	-0.15093	-0.10214
1	17130032	17130196	-0.10013	-0.28796	-0.01274	-0.00674	-0.00246	-0.05933	-0.00013
1	17341841	17341945	-0.01432	-1e-05	-0.06377	0.3117	-0.01131	-0.23235	-0.00179
1	17364887	17365028	-0.80119	-0.27779	-2e-05	-0.23365	-0.16031	-0.5232	-0.06389
1	17373697	17373921	-0.70972	-0.4716	-2e-05	-0.02464	-0.34963	-0.13413	-0.00354
1	17557087	17557273	-0.00318	-0.0005	-1e-05	-0.00239	-0.00091	-0.57934	0.94423
1	18363069	18363446	-0.06044	-0.03412	-0.00342	-0.0039	-0.3543	-0.99416	0.85641
1	18545767	18546095	-0.0057	-0.00292	-6e-05	-0.00344	-0.00488	-0.20133	0.60975
1	18613950	18614066	-4e-05	-0.00028	0	-0.00014	-0.00059	-0.03893	0.99999
1	18620548	18620663	-4e-05	-0.00027	0	-0.00014	-0.00058	-0.03889	1
1	19067298	19067596	-0.00072	-0.00056	1	-0.01887	-0.00706	-0.14277	-0.32305
1	19212488	19212695	-0.00079	-4e-05	-0.00047	-0.00563	-0.00292	-0.29204	-0.02159
1	19372027	19372216	-0.00918	-0.00593	-0.00404	-0.03638	-0.07868	-0.01187	-0.00131
1	19449432	19449694	-0.00138	-0.00304	-1e-05	-0.04121	-4e-05	-0.00114	-0.01423
1	19483797	19484074	-0.33033	-0.0064	-0.02183	-0.00268	-0.00017	-0.04284	-0.05229
1	19676985	19677143	-0.05576	-0.34959	-0.02276	-0.0264	-0.00052	-0.26878	-0.00052
1	19858753	19858934	-0.28227	-0.16517	-0.00034	-0.12349	-0.39102	-0.78133	-0.00012
1	19913054	19913179	-0.64226	0.35902	-0.21502	-0.00403	-0.00098	-0.01451	-0.07941
1	19915557	19915946	-0.69229	-0.09997	-0.19539	-0.03831	-0.00369	-0.47342	-0.04037
1	19931033	19931168	-0.21062	-0.03246	1	-0.19696	-0.00011	0.97094	-0.59955
1	19968841	19969088	-0.02548	-0.04577	-0.09011	-0.04186	-0.38511	-0.00509	0.40261
1	20592645	20592796	-0.00328	-0.00103	-7e-05	-0.19873	-0.00076	-0.04123	-8e-05
1	20750757	20750937	-0.00374	-0.00455	-0.00116	-0.00018	-0.099	-0.20539	-0.01881
1	20931911	20932106	-0.4267	-0.16237	-0.03234	-0.01276	-0.0019	-0.01101	-0.00011
1	20935869	20935969	-0.0001	-0.04152	-0.02169	-0.00122	-0.00033	-0.9477	0.84945
1	20973436	20973581	-0.00843	-0.01754	-0.00015	-0.60243	-0.02968	-0.06556	-0.00025
1	21001872	21001980	-0.14071	-0.85889	-0.59532	-0.02383	-0.00771	-0.00125	-0.10677
1	21135855	21135960	-0.12826	-0.00122	-0.00014	-0.17102	-0.10166	-0.00036	-0.03748
1	21878176	21878365	-0.00259	-0.00137	-0.05228	-0.19322	-0.36901	0.03721	-0.2622
1	22294539	22294646	-0.00312	-0.00011	0	-0.05999	-0.01488	-0.03392	-0.40542
1	22295231	22295431	-0.00016	-0.00052	0	-1e-05	-0.00013	-1e-05	0
1	22295435	22295581	-0.00073	-0.03071	-0.019	-0.01911	-0.02361	-0.00616	-0.00123
1	22295678	22295797	-0.00201	-0.00237	-0.00214	-5e-05	-0.01126	-0.00178	-0.00052
1	22296134	22296259	0	-0.00235	-0.0616	-0.23854	-0.0027	-0.57745	0.9279
1	22296909	22297083	-0.00291	-0.06705	-4e-05	0.79295	0	-5e-05	1
1	22300374	22300501	-0.03308	-9e-05	-0.00466	-0.05388	0	-0.15104	-0.09282
1	22858391	22858521	-0.02549	-0.012	-0.0136	-0.03698	-0.01335	-0.03968	-0.00071
1	22863051	22863186	-0.0036	-0.16373	-0.06975	-0.20341	-0.00346	-0.0598	-0.68237
1	23061406	23061713	-0.24378	-0.12131	-0.36594	-0.02912	-0.03466	0.62778	-0.73507
1	23301539	23301705	-0.0015	-0.03456	-0.00852	-0.51303	-0.00075	-0.04268	-0.12661
1	23336309	23336502	-0.00089	-0.0006	-1e-05	-0.01076	-0.0012	-0.02231	-0.11387
1	23486788	23486902	-8e-05	-0.003	-0.09735	-0.34978	-0.09123	-0.85589	-0.04829
1	23508279	23508386	-0.04514	-0.08301	-0.01892	-0.16238	-0.11075	-0.837	-0.68212
1	23533938	23534083	0	0	0	0	0	-0.04579	0.16442
1	23763654	23763896	-0.72683	-0.3296	-0.00036	-0.1056	-0.0053	-0.71722	-0.14566
1	24016516	24016699	0.71628	0.65466	-8e-05	-0.07106	-0.05846	-0.40054	-0.05628
1	24258855	24259022	-0.04893	-0.08565	-0.00017	-0.03349	-0.38165	-0.00724	-0.2322
1	24268367	24268567	-0.63829	-0.10084	-0.04567	-0.55321	-0.00025	-0.22763	-0.51818
1	24647943	24648093	-0.02149	-0.00262	-0.01918	-0.07651	-0.00102	-0.03588	-0.00361
1	25017557	25017738	-0.00667	-0.00112	-0.00029	-0.00305	-0.00125	-0.04616	-0.00128
1	25242352	25242523	-1e-05	0	0	0	0	-0.00193	-0.00955
1	25269217	25269331	-0.34198	-0.34959	-0.15648	-0.00092	-0.32578	-0.19888	-0.00088
1	25269751	25269943	-0.01867	-0.18078	-0.13169	-0.00239	-0.00335	-0.00142	-0.00022
1	25386850	25387022	-0.0326	-0.07157	-4e-05	-0.00135	0	-0.07182	-0.1068
1	25390522	25390868	-0.47569	-0.40533	-0.0839	-0.51138	-0.00088	-0.69569	-0.14426
1	25406545	25406715	-0.00442	-0.00064	-0.00488	0	-0.00365	-0.00062	-0.16477
1	25420223	25420326	-0.10862	-0.01102	-0.10835	-0.24894	-0.08477	-0.00915	-0.58552
1	25454548	25454851	-0.45161	-0.43023	-0.10917	-0.01687	-0.00889	-0.88052	-0.12002
1	25463718	25463840	-0.07753	-0.00278	-7e-05	-0.00216	-0.00226	-0.21222	-0.11358
1	25464215	25464367	-0.00126	-5e-05	-2e-05	-0.0001	0	-0.02422	-0.00124
1	25487066	25487201	-0.10941	-0.03071	-0.5944	-0.00767	-0.02031	0.61429	-0.22326
1	25491072	25491174	-0.00964	-0.10998	-0.0144	-0.01906	-0.22354	-0.03658	-0.00223
1	25505266	25505541	-0.2565	-0.08206	-0.00687	-0.00014	-0.00393	-0.16958	-0.1271
1	25514131	25514236	-0.10987	-0.00096	-0.00012	-0.13462	-0.08182	-0.08642	0.42666
1	25528899	25529006	-1e-05	-1e-05	0	0	-0.00197	-0.16496	-0.10927
1	25547496	25547890	-0.04722	-0.0069	-0.00077	-0.00879	-0.05959	-0.26361	-0.00208
1	25601641	25601781	-0.09409	-0.05327	-0.01334	-0.00013	-6e-05	0	-0.31856
1	25602654	25602872	-0.00298	-0.0041	-0.00079	-0.00164	-0.00074	-0.00842	0.22131
1	25603967	25604718	0.36263	0.8899	-0.00978	-0.3052	-0.12192	-0.40802	-0.70595
1	25606025	25607122	-0.16725	-0.15742	-0.06542	-0.00514	-0.01299	-0.03359	-0.02581
1	25630751	25630974	-0.08381	-0.37235	-0.00453	-0.05884	-0.28685	-0.28147	-0.00098
1	25672298	25672425	-0.0002	-0.001	-0.00216	-0.0306	-0.14838	-0.52653	-0.00921
1	25725130	25725264	-0.00537	-0.00709	-0.00021	-0.00186	-0.00463	-0.48345	-0.19018
1	25732220	25732328	-0.00329	-0.0008	-0.10135	-0.0211	-0.00561	-0.24814	-0.00028
1	25817817	25817997	-0.46304	-0.16055	-0.00423	-0.40516	-0.00985	-0.25246	-0.27595
1	25835694	25835808	-0.01155	-0.03631	-0.12705	-0.0113	-0.00019	-0.30075	-0.09465
1	25839502	25839620	-0.02452	-0.02857	-0.42356	-0.15167	-0.07736	0.78778	0.83275
1	25840081	25840201	-0.03658	-0.01781	-0.00367	-0.03298	-0.00537	0.96419	0.91534
1	25842654	25843250	-0.00743	-0.00963	0	-0.02414	-0.00119	-0.0359	-0.00446
1	25845202	25845360	-0.08886	-0.00929	0	-0.14126	-0.00214	-0.00637	-0.0073
1	25845689	25845907	-0.38889	-0.02735	-0.03101	-4e-05	-0.12979	0.19448	0.26627
1	26030114	26030214	-0.17907	-0.05319	-0.01224	-0.00255	-0.01572	0	-0.00123
1	26038489	26038782	-0.0014	-0.0038	-0.00068	-0.00173	-6e-05	-0.01025	-0.00952
1	26164612	26164805	-0.00075	-0.00391	0	-0.0024	-0.00391	-0.09443	-0.2263
1	26193550	26193795	-0.02744	-0.01638	-0.00067	-0.00057	-0.00016	-0.03533	-0.04812
1	26200229	26200373	-0.14232	-0.02239	-0.07071	-0.86735	-0.00399	-0.34896	-0.11588
1	26329605	26329777	-0.17703	-0.04982	-0.00028	-0.00074	-0.00466	-0.04228	-0.00016
1	26418795	26418901	-0.0001	-0.0067	-0.02682	-0.00022	-0.00014	-0.29894	-0.00712
1	26444205	26444308	-0.01102	-0.01408	-0.02715	-3e-05	-0.00014	-0.82843	-0.22186
1	26648291	26648419	-0.03024	-0.05383	-0.00254	0.99999	-0.00069	-0.13374	0.81107
1	26648422	26648673	-0.05292	-0.02344	-0.00439	1	-0.00046	-0.20408	0.87652
1	26706071	26706228	-0.06562	-0.07368	-0.04833	-0.12439	-0.22125	-0.0651	-0.00034
1	26721103	26721205	-0.00015	-0.0004	-0.00841	-0.02926	-0.00033	-0.00171	-0.21172
1	26749834	26750034	-0.52008	-0.01655	-0.00236	-0.15812	-0.22584	-0.44589	-0.38423
1	27332493	27332670	-0.07245	-0.00049	-0.01164	-0.00172	-0.00734	-0.0234	-0.00104
1	27581718	27581878	-0.0018	0	-0.00164	-2e-05	-0.00012	-0.00152	-0.06173
1	27601679	27601810	-0.0059	-0.00633	-0.00022	-0.00013	0	-0.01116	-0.00039
1	28649121	28649295	-0.24978	-0.13374	-0.00114	-0.00513	-0.0362	-0.24323	0.54035
1	29025643	29025756	-0.08371	-0.0637	-0.00242	-0.02118	-0.00701	-0.20184	-0.07113
1	29163304	29163710	-0.12093	-0.01464	-1e-05	-1e-05	-0.0195	-0.60855	-0.05185
1	29180212	29180367	-0.42252	-0.10372	-0.00952	-0.01261	-0.00846	-0.52168	-0.08602
1	29181914	29182097	-0.03069	-0.00686	-0.00058	-0.10954	-0.03271	-0.02148	-0.46752
1	29348616	29348940	-0.06813	-0.00783	-0.00032	-0.05571	-0.01361	-0.00473	-0.03579
1	29363740	29364075	-1e-05	-0.00013	-0.00146	-0.07648	-0.0003	-0.69056	-0.55555
1	29840876	29841054	-0.32093	-0.22693	-0.0041	-0.01712	0	0.82623	-0.07844
1	29871908	29872025	-0.00138	-0.00375	-0.00624	-0.00074	-0.06979	-0.00133	-0.21452
1	29881389	29881561	-0.00968	-0.0002	-0.01045	-0.05577	-0.29249	-0.68586	-0.28871
1	30048005	30048205	-0.00136	-0.00057	-0.00014	-0.00285	-0.11335	-0.31875	-0.04035
1	30408700	30408880	-0.02723	-0.02082	-0.03633	-0.0332	-0.08508	-0.3745	-0.00082
1	30706584	30706694	-0.00239	-0.11855	-0.00358	-0.30615	-0.08104	-0.06033	-0.1153
1	31607856	31608084	-0.03759	-0.02021	-0.00369	-0.02486	-3e-05	-0.69427	0.42358
1	31694090	31694204	-0.01396	-0.01283	-1e-05	-0.00049	-0.00033	-0.08618	-0.01724
1	32052424	32052543	-0.24266	-0.05444	-0.01914	-0.00833	-0.00036	-0.002	-0.82417
1	32175807	32175951	-0.47502	0.90655	-0.25184	-0.30257	-0.06771	-0.66572	-0.00047
1	32574615	32574739	-0.03691	-0.03209	-0.16805	-0.00187	-0.0009	-0.02656	-0.00121
1	32710713	32710824	-0.00254	-0.02636	-0.00337	-0.19499	-0.00736	-0.04887	-0.00226
1	32830650	32830766	-0.00866	-0.07749	-0.17745	-0.40692	-0.01247	-0.07481	-0.03817
1	32846760	32847041	-0.1471	-0.00592	-0.00499	0.89831	-0.34798	-0.04684	-0.00035
1	33099534	33099813	-0.11435	-0.47352	-0.01673	-0.02112	-2e-05	-0.88318	-0.05507
1	33120341	33120677	-0.18534	-0.00805	-0.04777	-0.18901	-0.00845	-0.1047	-0.21743
1	33463494	33463619	-0.0009	-2e-05	-0.00078	-0.02181	-0.0001	-0.00337	-0.00032
1	33701676	33701883	-0.4416	-0.7861	-0.58034	-0.11449	-0.08472	-0.0619	-0.38638
1	34054388	34054598	-0.1225	-2e-05	-0.00065	-0.00013	-0.00015	-0.14265	0.90019
1	34094582	34094682	-0.00314	-0.00157	-0.00741	-0.33767	-0.01626	0.94762	-0.04306
1	34114211	34114319	-0.05337	-0.08103	0	-0.00324	-0.01183	-0.0037	-0.02471
1	34135473	34135659	-0.10225	-0.08975	-0.02006	-0.00113	-0.0285	-0.00917	-0.00545
1	34160832	34161071	-0.00801	-0.05781	-0.00431	-0.15789	-0.00422	-0.03895	-0.00147
1	34173755	34173963	-0.00415	-0.00049	-0.00204	-0.00014	-0.00215	-0.01553	-3e-05
1	34239096	34239360	-0.00206	-0.02889	-0.47726	-5e-05	-0.00193	-0.03926	1
1	34313899	34314058	-0.24634	-0.02448	-0.05618	-0.02731	1	-0.0211	-0.00044
1	35014263	35014421	-0.02197	-0.53504	-0.1537	-0.00647	-0.00415	-0.02911	-0.00493
1	35191300	35191499	-0.00031	-0.11817	-0.0003	-0.00533	-0.01565	-0.0005	0.33674
1	35755955	35756083	-0.00045	-0.00034	-0.00023	-0.00052	-0.01172	-0.00611	0.93288
1	35971348	35971567	-0.01603	-0.00039	-0.00043	-0.4136	-0.01155	-0.00235	0.82013
1	37000467	37000718	-0.09181	1	-6e-05	-0.00127	-1e-05	-4e-05	-0.00887
1	37059469	37059709	-0.01952	-0.01132	-0.07597	-0.13845	-0.00348	-0.17973	0.42297
1	37127153	37127362	-0.0007	-0.01171	-0.00852	-0.00673	-0.00045	-0.84727	-0.06181
1	37311358	37311524	-2e-05	-6e-05	-2e-05	-0.00219	-4e-05	-0.0767	-0.40046
1	37406888	37407002	-0.10364	-0.01564	-0.01376	-0.10263	-0.01741	-0.00715	-0.32625
1	38517771	38517942	-0.34713	-0.23982	-0.03997	-0.196	-0.00823	-0.32506	-0.00676
1	38658436	38658620	-0.09737	-0.10279	-0.0004	-0.00294	-0.05697	-0.00644	-0.11261
1	38703457	38703566	-0.00062	-0.00115	-0.00022	-0.29422	-0.12738	-0.04103	-0.18238
1	38704072	38704214	-2e-05	0	-1e-05	-2e-05	-4e-05	0	0
1	38854098	38854316	-0.37485	0.93787	-0.01629	-0.03186	-0.04388	0.06653	-0.30698
1	38862171	38862281	-0.02887	-0.0005	-0.00112	-0.07022	-0.00632	-0.04741	-0.30464
1	38872182	38872373	-0.00033	-0.00372	-2e-05	-0.32842	-0.22004	-0.39839	-1e-05
1	39014048	39014174	-0.07843	-0.06701	-0.10422	-0.08977	-0.33389	-0.36211	-0.00249
1	39039927	39040032	-0.0347	-0.22849	-0.0134	-0.03995	-0.08747	-0.06761	-0.00575
1	39329629	39329867	-0.23318	-0.6021	-0.06586	-0.18855	-0.01884	-0.09913	-0.00117
1	39401261	39401403	-0.44448	-0.07685	-0.08778	-0.31498	-0.03889	-0.00233	-0.68075
1	39724699	39724935	-0.00915	-0.01277	-0.00052	-0.00118	-0.04323	-0.20565	-0.00119
1	39974637	39974805	-0.0774	-0.09393	-0.02697	-0.03092	-0.27116	-0.50192	-0.00065
1	40385984	40386110	-0.14432	-0.0159	-0.29859	-0.17394	-0.0002	-0.11686	-0.11088
1	40594580	40594685	-0.16938	-0.21355	-0.34347	-0.00023	-0.41374	0.31426	-0.08339
1	40726835	40726999	-0.00023	-2e-05	0	0	-0.00583	-0.0001	-0.1041
1	40796073	40796313	-0.35711	-0.17402	-0.00336	-3e-05	-0.27194	-0.5884	-0.18308
1	40809737	40810132	-0.12051	-0.21978	-0.0003	-0.03195	-0.00507	-0.32856	-0.02492
1	40948030	40948138	-0.00224	-0.00032	-1e-05	-0.01518	-0.01789	-0.05973	0.90636
1	40993815	40994129	-0.03812	-0.00013	-0.01314	-0.00052	-0.81348	-0.17175	-0.00089
1	41179643	41179800	-0.00734	-0.00101	-1e-05	-0.03493	-0.00103	0.58843	-0.96173
1	41180664	41180774	-0.01424	-1e-05	-0.0001	-0.00151	-0.00299	-0.08746	-0.02257
1	41720749	41720860	-0.06464	0.41407	-0.00327	0.74751	-0.16623	-0.04318	0.47094
1	41720880	41721026	-0.12936	-0.05572	-0.00375	-0.00714	-0.00175	-0.00136	-0.02844
1	41780340	41780830	-0.23142	-0.0028	-0.54322	0.98444	-0.07533	-0.79681	-0.34591
1	42206177	42206328	-0.00933	-0.00047	-3e-05	0	0	-0.00264	0.35963
1	43466045	43466191	-0.19696	-0.00151	-0.01645	-0.0009	-0.00244	-0.00102	-0.0107
1	43549114	43549232	-0.01682	-0.02056	-0.11527	-0.00013	-0.27369	-0.16825	-0.10537
1	43567271	43567502	-0.39858	-0.14496	-0.0248	-0.06345	-0.01794	-0.40518	-0.19799
1	43605749	43605862	-0.00372	-0.00259	-0.00036	-0.00994	0	-0.00141	-0.00016
1	44404331	44404527	-0.3845	-0.42911	-0.00173	-0.00294	-0.00753	-0.32867	-0.62672
1	44438041	44438238	-0.56397	-0.04743	-1e-05	-0.38074	-0.00048	0.83256	-0.39125
1	44443773	44443894	-0.04918	-0.70961	-0.00673	-0.00607	-0.20967	-0.23654	0.78046
1	44448669	44448810	-0.06373	-0.00526	-0.04131	0.99999	-0.0122	-0.14639	-0.00676
1	44668981	44669091	-0.5348	-0.38091	-0.0783	-0.00779	-0.01517	-0.49515	-0.58587
1	44736859	44737012	-0.00051	-0.00046	-0.00906	-0.01534	-0.41586	-0.46718	-0.01285
1	44901206	44901415	-0.02814	-0.04551	-0.03143	-5e-05	-1e-05	-0.71505	-0.00089
1	44909392	44909510	-0.012	-0.01999	-0.00416	-0.01289	-0.00193	-0.4657	-0.11045
1	45623186	45623306	-0.27693	-0.79848	-0.02037	-0.27149	-0.12459	-0.00041	-0.27988
1	46301121	46301390	-0.15974	-0.39649	-4e-05	-0.66875	-0.5103	-0.1009	-0.07784
1	46423288	46423484	-0.00148	-0.04818	-0.01041	-0.00214	-0.00144	-0.04515	-0.00259
1	46439348	46439620	-0.3105	-0.00363	-0.0707	-0.09755	-0.03024	-0.33276	-0.02077
1	46484397	46484567	-0.00357	-0.0285	-0.00316	-0.01016	-0.03422	-0.62923	0.73356
1	46502489	46502829	-5e-05	-0.00153	0	-1e-05	0	-0.00119	-5e-05
1	46504359	46504557	-0.00698	-0.00784	-0.0726	-0.01608	-0.14603	-0.99166	0.2284
1	46508353	46508645	-0.06412	-0.02133	-0.11065	-0.07876	-0.28384	-0.00078	-0.35338
1	46523202	46523355	-0.03456	-0.10605	-0.25575	-0.00116	-0.01238	-0.01437	-0.16384
1	46579010	46579204	-0.28914	-0.50602	-0.0016	-5e-05	-0.01396	0.71121	-0.00737
1	46650356	46650507	-0.00503	-0.0019	0	1	0	-0.00083	-0.03871
1	46925531	46925699	-0.03287	-0.02494	-0.00695	-0.08836	-1e-05	-0.27413	-0.88149
1	46963334	46963561	-0.2398	-0.60743	-0.04219	-0.00677	-0.00336	-0.01524	-0.07876
1	47109664	47109934	-0.00461	-0.0043	-0.00047	-6e-05	0	-0.57161	-0.00791
1	48526934	48527202	-0.22097	-0.12957	-0.13564	-0.02293	-0.00159	0.15446	-0.17743
1	48534824	48534947	-0.20409	-0.88866	-0.50262	-0.08383	-0.33691	-0.81037	-0.10626
1	49113156	49113302	-2e-05	-0.00486	-0.02311	-0.00069	-0.07764	-0.44637	-0.0115
1	50158128	50158332	-0.01785	-0.29161	0	-0.02819	-0.02841	-0.03392	-4e-05
1	52340596	52340871	-0.00335	-0.02795	0	-0.0286	-0.00016	-0.04264	-0.18954
1	52556331	52556528	-0.00108	-0.01192	-0.00252	-0.49652	-0.009	-0.00283	-0.1688
1	52614277	52614437	-0.40814	-0.08211	-0.17122	-0.0317	-0.01953	-0.33264	-0.02438
1	52838202	52838369	-0.028	-0.06039	-1e-05	-0.08938	-0.00535	-0.04865	-0.28713
1	52855589	52855718	-0.04415	-0.00064	-0.00098	-0.0073	-0.03473	-0.00404	-0.29117
1	52940017	52940313	-0.43826	-0.03162	-0.0129	-0.01241	-0.1076	-0.00578	-0.01031
1	53252565	53252744	-0.02925	-0.00188	-0.00244	-0.27743	-0.03218	-0.61987	-0.00096
1	53887911	53888043	-0.01128	-0.00175	-0.00542	-0.01833	-0.0497	-0.02326	-0.00527
1	54013951	54014199	0	-6e-05	0	0	-0.00047	-1e-05	0.91623
1	54036838	54037070	-0.00222	-0.13816	-0.07969	-0.16576	-0.08763	-0.00243	-0.0019
1	54135083	54135212	-0.00016	-0.00026	-0.0006	-0.00044	-0.00387	-0.00433	-0.00334
1	54151351	54151819	-0.05305	-0.57321	-0.02132	-0.39181	-0.01412	-0.00455	-0.03347
1	54167336	54167518	-0.00509	-0.0002	-0.0001	-0.01003	-0.0211	-0.00073	-3e-05
1	54551486	54551600	-0.00071	-0.32661	-0.06161	-0.00079	-0.00542	-0.3926	-0.02204
1	54996016	54996128	-0.03148	-0.01735	-0.00083	-0.03502	-9e-05	-0.46412	-0.26046
1	55032191	55032451	-0.2382	-0.1957	-0.10085	-0.02895	-0.00086	-0.02004	-0.00017
1	55374044	55374298	0	0	-1e-05	-5e-05	-0.0053	-0.34722	-0.00513
1	55388756	55388876	-0.00026	-0.0004	-0.01318	-1e-05	-6e-05	-0.0007	-0.01439
1	55459958	55460084	-0.16249	-0.2437	-0.00465	-0.06333	-0.09536	-0.79489	-0.12728
1	55742378	55742620	-0.32389	-0.07123	-0.09849	-0.2983	-0.02126	-0.39805	-0.67929
1	56064284	56064397	-0.01479	-0.00081	-0.02783	-0.13896	-0.02581	-0.15512	-0.06035
1	56229564	56229766	-0.28054	-0.14793	-0.0125	-0.00038	-0.02942	-0.74196	-0.0017
1	56315546	56315769	-4e-05	-0.01009	-0.00068	0.64059	-0.05948	-0.53715	-0.08915
1	57153875	57153982	0	0	0	0	0	-7e-05	0
1	57220530	57220685	-0.00933	-0.00036	-1e-05	-0.009	-7e-05	-0.00029	-0.00182
1	57616412	57616566	-0.01518	-0.00353	-0.01514	-0.00665	-0.02188	-0.05259	-0.02622
1	57811290	57811417	-0.05021	-0.0098	-0.26053	-0.0038	-0.03375	-0.00597	-0.10526
1	57998867	57998980	-3e-05	0	-4e-05	1	-4e-05	-0.04247	-0.00065
1	58713483	58713857	0.21182	0.73914	-0.22384	-0.00068	-0.05502	-0.44303	-0.03458
1	58897183	58897321	-0.0197	-0.03457	-0.00121	-1e-05	-0.08203	-0.01768	-0.92205
1	60005650	60005759	-0.01451	-1e-05	-0.00134	-0.0297	-0.08424	-0.19992	-0.10724
1	60577188	60577316	-0.02307	-0.1617	-0.22943	-0.29487	-0.00875	-0.14282	-0.00036
1	61195025	61195208	-0.15095	-0.02379	-0.10302	-0.11323	-0.14845	-0.64454	-0.00547
1	61394772	61394956	-0.01983	-0.0145	-0.00944	-0.00025	-0.00066	-0.09152	-0.02415
1	61613537	61613769	0.97618	-0.79301	-0.08942	-0.02285	-0.00207	0	-0.07173
1	62274775	62274942	-0.91783	0.96068	0.54652	-0.29429	-0.22695	0	-0.48163
1	62791403	62791583	-0.27532	-0.28398	-0.13537	-0.71848	-0.07734	-0.66044	-0.44865
1	62906079	62906265	-0.00602	-0.22367	-0.10783	-0.05003	-0.00356	-0.51076	-0.00804
1	63354892	63355178	-0.19188	-0.94552	-0.03588	-0.15371	-0.00079	0.00595	-0.63076
1	63366820	63367030	-0.28694	-0.02086	-0.0007	-0.00578	-0.01086	-0.00142	-0.00093
1	63558018	63558207	-0.02618	-0.02482	-0.06238	-0.00058	-0.23272	-0.43062	-0.01376
1	63658859	63659294	-0.09426	-0.10434	-0.08533	-0.01635	-0.00425	0.76475	-0.52073
1	63660983	63661094	-0.00353	-0.00125	-0.00073	-0.00075	-0.04804	-0.00113	-0.00102
1	63780128	63780407	-0.00207	-0.07106	-0.30366	-0.13355	-0.0205	-0.71204	-0.16914
1	63817921	63818066	-0.00855	-0.01059	-0.07177	-0.00172	-0.00063	-0.07944	-0.01204
1	64261296	64261415	-0.35964	-0.21649	-0.00688	-0.13701	-0.03677	-0.18427	-0.76557
1	64307581	64307690	-0.00287	-3e-05	-0.01052	0	-0.00015	-0.00017	0
1	66202338	66202986	-0.34238	-0.35181	0	-4e-05	-0.27414	-0.09254	-0.61126
1	66255249	66255457	-3e-05	-0.00023	0	-0.00367	-0.00033	-0.03803	-0.01866
1	66869307	66869489	-0.00016	0	-0.00057	-1e-05	-1e-05	-0.00831	0.99999
1	68787904	68788127	-0.00015	-0.01152	-6e-05	-0.09864	0	-0.17517	1
1	68823618	68823768	-0.00323	-0.00126	-0.00019	-0.00488	-0.00982	-0.00518	-0.6912
1	68914794	68915021	-0.03776	-0.29113	-0.03144	-0.00016	-0.00766	-0.02618	-0.27652
1	68915028	68915262	-0.04335	-0.08045	-0.03373	-0.02145	-0.03411	-0.05042	-0.00364
1	69430817	69430937	-0.00042	-0.00179	0	-0.00014	0	-1e-05	-4e-05
1	69897236	69897510	-0.02896	0.99998	1	-6e-05	-0.00032	-0.00012	-0.01347
1	69916639	69916785	-0.02086	-0.00211	0.99999	-0.04287	-0.14008	-0.40396	-0.00064
1	69944598	69944729	-5e-05	0.99998	0.99998	-0.76535	-0.00088	-0.32303	0.33017
1	69946726	69946967	-0.00445	-0.01213	-0.00048	-0.00325	-0.05748	-0.25077	-0.42915
1	69953577	69953946	-0.03449	-0.00311	-5e-05	0	-0.00389	-0.00073	-4e-05
1	69961023	69961199	-0.00405	1	-0.07881	-0.16943	-0.3796	-0.29222	-0.01738
1	69993073	69993352	-0.00528	-0.0003	-0.00296	-8e-05	-0.02197	-0.23652	-0.01326
1	69994077	69994344	-0.05406	-0.00211	-4e-05	-6e-05	-0.0054	-0.00093	-6e-05
1	70026003	70026298	-0.23706	-0.65707	-0.50059	-0.09428	-0.00113	-0.20574	-0.45623
1	70038444	70038746	0	0	0	0	0	0	0
1	70040755	70041129	-0.05781	-0.0024	-0.00159	-0.07223	-0.00056	-0.01625	0
1	70047303	70047493	-0.09529	-0.14303	-0.01257	-0.0895	-0.00016	-0.00074	-0.03025
1	70048572	70048744	-0.29332	-0.18076	-0.02802	-0.035	-0.00158	-0.06992	-0.11995
1	70052572	70052703	-0.08187	-0.08254	-0.00298	-0.17046	-0.03925	-0.02075	-0.04816
1	70052705	70052828	-0.05236	-0.06103	-3e-05	-0.018	-3e-05	-0.04714	-6e-05
1	70067294	70067527	-0.01995	-0.00347	-0.02245	-0.09656	-0.00136	-0.69035	-0.46774
1	70084009	70084228	-0.00024	-0.00016	0.99999	-0.10013	0	-0.37199	0.75426
1	70084230	70084335	-0.00171	-0.01907	1	-3e-05	-0.00438	-0.01346	-0.12431
1	70085891	70086002	-0.00019	-0.00036	-0.00013	-0.08188	-0.00455	-0.20545	-0.01182
1	70090514	70090667	-0.00013	-0.00763	-0.00017	-0.00289	0	-0.15843	-0.18565
1	70098505	70098637	0.99998	1	-1e-05	-0.04326	-0.01779	-0.06394	-0.31187
1	70122549	70122790	-0.02559	-0.04873	-0.00043	-0.00054	-4e-05	-0.06853	-0.96178
1	70125639	70125773	-0.00496	-0.00248	-0.06568	-0.00739	-0.04815	-0.00395	-0.01771
1	70125780	70125893	-0.00549	-0.20205	-0.02629	-0.07344	-0.00049	-1e-05	-0.06806
1	70126712	70126873	-0.02033	-0.04459	-0.02802	-9e-05	-0.11585	-0.01478	-0.01299
1	70144158	70144356	-0.08816	-0.02841	-0.03061	-0.06518	-0.00023	-0.01769	-0.1525
1	70146987	70147184	-0.01751	-0.02546	-0.10701	-0.00019	-0.00242	-0.00298	-0.05395
1	70147602	70147768	0	0	0	0	0	0	0.46479
1	70170465	70170596	-9e-05	-0.01554	-0.00434	-0.99281	-0.26904	-0.50227	-0.80425
1	70172667	70172784	1	-0.0008	0.99999	-5e-05	-0.00605	-0.2731	-0.00054
1	70173215	70173550	-0.17809	-0.15172	1	-0.00972	-0.03771	-0.09962	-0.12072
1	70540890	70541162	-0.00643	-0.05584	-0.00073	0	-0.00052	-0.03547	-0.0156
1	70543129	70543307	-0.01883	-0.04775	-0.00017	-0.03681	-0.03977	-6e-05	-0.00852
1	70575692	70575914	-0.00682	-0.01026	0.98134	-0.01868	-0.08082	-0.11605	-0.87338
1	70613353	70613820	-0.00097	-0.00214	-0.00012	-0.00178	-2e-05	-0.00113	-0.00137
1	70634047	70634191	0	0.99999	0	-0.00022	-0.00542	-0.0001	-0.00423
1	70698615	70698814	-0.00121	-0.02603	0	-0.00048	-0.00266	-0.49126	-0.00366
1	70752767	70753120	-0.00039	-0.00022	-0.00435	-0.00035	-0.00377	-0.00058	-0.00286
1	71053294	71053469	-0.29534	-0.26018	-0.0358	-0.1388	-0.00112	-0.33136	-0.00245
1	71053473	71053590	-0.14717	-0.0009	-1e-05	-0.11321	-0.12735	-0.23247	0.43384
1	71069321	71069576	0	-0.00078	0	-9e-05	-0.00016	-0.01353	-5e-05
1	71135998	71136124	-0.00121	-0.00056	-0.10192	-0.00013	-0.09118	-0.24296	-0.33451
1	71306753	71306894	-0.01862	-0.01728	-0.05856	-0.2383	-0.07024	-0.00756	0.73127
1	71306899	71307011	-6e-05	0	-0.00029	-0.07528	-0.09403	-0.22346	-0.22794
1	71697634	71698023	-0.00031	-0.01338	0	-0.03271	-0.00026	-0.85005	-0.0581
1	71876670	71876783	-0.08103	-0.01529	-0.25286	-0.01529	-0.00052	-0.08635	-0.00299
1	71880180	71880321	-0.24135	-0.14002	-0.00968	-0.06072	0	-0.1114	-0.18683
1	72042520	72042876	-0.43173	-0.10757	-0.03548	0.58271	-0.00594	-0.92172	-0.03843
1	72117999	72118129	-0.01603	-0.0215	-0.00104	-0.02918	-0.01213	-0.00206	0.7503
1	72568481	72568612	-0.12107	-0.02694	-0.08307	-0.32583	-0.04154	-0.05295	-0.28365
1	72819194	72819351	-0.05519	-0.02979	-0.16401	-0.31694	-0.00538	-0.20878	-0.05228
1	74568346	74568512	-2e-05	-5e-05	-0.00759	-0.00028	-0.00014	-0.10366	-0.10887
1	80216007	80216142	-0.60461	0	-0.07788	-0.00967	-0.3103	-0.32653	0.53992
1	80404903	80405075	-0.01974	-0.02169	-0.3672	-5e-05	-0.0007	-0.52012	-0.2447
1	81016419	81016526	-0.20552	-0.13353	-0.00051	-0.33175	-0.13049	-0.00983	-0.04502
1	81041254	81041377	-0.01512	-0.00051	-0.00219	-0.0001	-0.00274	-0.00013	0
1	81176227	81176380	-0.05248	-0.05535	-0.00888	-0.00063	-0.00129	-0.02001	-0.33357
1	81202194	81202347	-0.00015	-0.00013	0	-0.00704	-1e-05	-7e-05	0
1	81303706	81303883	-0.01321	-0.09112	-0.00064	-3e-05	-0.00529	-0.01413	-0.6493
1	81362681	81362861	-0.03243	-0.05045	-0.05183	-0.00127	-0.00192	0.67381	0.43007
1	81625178	81625288	-0.00022	-5e-05	-0.00022	-0.00071	-0.0008	-0.00328	-0.34012
1	81807392	81807562	-0.16519	-0.0878	-0.00481	-0.01907	-0.00793	-0.1046	-0.6172
1	81860481	81860790	-0.34274	-0.00682	-0.09627	-0.00236	-0.03201	-0.22014	-0.28627
1	81922650	81923007	-0.00253	-0.02944	-0.00025	-0.01707	-0.30887	-0.3288	-0.11912
1	81965251	81965405	-0.00448	-3e-05	-0.02352	-0.00243	-0.12934	-0.8563	-0.00126
1	82043441	82043644	-0.10676	-0.00239	-0.00274	-1e-05	-0.00012	-0.45933	0.4475
1	82188905	82189043	-0.00046	-0.01074	-0.03397	-0.00065	-0.00824	-0.06233	-0.00854
1	82643885	82644116	-0.03111	-0.049	-0.00242	-8e-05	0	-0.01203	-0.00321
1	82666575	82666717	-0.07447	-0.07136	-0.00558	-0.19089	-0.1965	0.98668	-0.03054
1	82693899	82694149	-0.00217	-0.01103	-4e-05	-0.00254	-0.01796	-0.02982	-0.00208
1	82711078	82711279	-0.02675	-0.00461	-0.00525	-0.09052	-0.03412	0.95892	-0.00922
1	82753401	82753548	-0.51453	-0.35559	-0.03382	-0.16882	-0.09746	-0.43785	-0.5486
1	82880684	82880804	-0.00024	-0.00015	-0.00084	0	-2e-05	-0.20689	-0.80174
1	82885787	82885972	-0.03102	-1e-05	-0.00356	-0.02781	-0.02757	-0.03533	-0.90463
1	82897315	82897433	-0.18804	-0.59429	-0.00507	-0.00083	-0.01544	-0.00764	-0.06366
1	82915055	82915283	-0.00106	-0.00022	-0.01944	-0.00912	-0.00676	-0.47124	-0.47676
1	83671363	83671581	-0.06	-0.02668	-0.0224	-8e-05	-0.0001	-0.05499	-0.19943
1	83671732	83671833	-0.01552	-0.05806	-1e-05	-1e-05	-0.61141	-0.35532	-0.71738
1	83674629	83674785	-2e-05	-0.00017	-0.00083	-2e-05	-6e-05	-0.04783	-0.07523
1	83829800	83829961	-0.00533	-0.03606	-0.0551	-0.14819	-0.00292	-0.37997	-0.17853
1	83848231	83848362	-0.00533	-0.00546	-0.003	0.69205	-9e-05	-0.26114	-0.19842
1	84012251	84012371	-0.1724	-0.04955	-0.00324	-0.00051	-0.01246	-0.08581	-0.27486
1	84339463	84339675	0	-0.00023	0	0	-0.00041	-0.04411	-0.46819
1	84393278	84393548	-4e-05	-2e-05	0	-0.0001	-0.01697	-0.04258	-0.08674
1	84509939	84510096	-0.14734	-0.1482	-0.81382	-0.00093	-0.00669	-0.03843	-0.11501
1	84529490	84529644	-0.00364	-0.00013	-0.89274	-0.00011	-0.01786	-0.52509	-0.61426
1	84703095	84703213	-0.05159	-0.03056	-0.00622	-0.01766	-0.00294	-0.00025	-0.0022
1	84733912	84734037	-0.00412	-0.03298	1	-0.46182	-0.05659	-0.41436	-0.12009
1	84771865	84772005	-0.1664	-0.42448	-0.00268	-0.01287	-0.00158	-0.98825	-0.79463
1	85119802	85119904	-0.00246	-0.00097	-2e-05	-0.00013	-0.00017	-0.04383	-0.00017
1	85217546	85217646	-0.27511	-0.89569	-0.05566	-0.01494	-0.00103	-0.00123	-0.02218
1	85217665	85217809	-0.00134	-0.00169	-2e-05	-0.00672	-0.00077	-0.01865	0
1	85225813	85225948	-0.00079	-0.00091	-0.00043	-1e-05	0	-0.02003	-0.00028
1	85790207	85790334	-0.00257	-0.07493	-0.03929	-0.25918	-0.01238	-0.36717	-0.00025
1	85993136	85993295	-0.1086	-0.02677	-8e-05	-0.00801	-0.00086	-0.0515	-0.09213
1	86135809	86135948	-0.49928	-0.30465	-0.08428	-0.0011	-0.23161	0.84787	-0.62587
1	86454742	86455013	-0.70103	-0.46475	-0.00057	-0.00497	-0.00053	-0.79898	0.596
1	87025610	87025727	-0.01255	-0.0301	-7e-05	-0.00356	-0.00027	-0.12052	-0.36228
1	87214471	87214607	-0.00373	-0.02047	-0.12305	-0.01469	-0.00797	-0.58927	-0.01956
1	87848970	87849114	-0.28189	-0.0225	-0.05549	-4e-05	-0.02016	-0.00184	-0.02303
1	87957743	87958008	-0.00031	-0.0052	-0.02398	-0.0081	-0.00028	-0.09739	-0.00373
1	88276766	88277190	-0.00013	0	0	0	0	-0.0008	-0.00111
1	88922438	88922631	-0.18687	-0.292	-0.00147	-0.11991	-0.19221	0.40951	1
1	88927441	88927551	0.9472	-0.34362	-0.3072	-0.02096	-0.40909	-0.02518	-0.06682
1	89908446	89908590	-0.50429	-0.33136	-0.02528	-0.00079	-0.13224	0.79156	-0.08633
1	90950738	90950959	-0.06094	-0.01008	-0.00108	-0.01023	-0.0003	-0.00033	-0.00052
1	90959273	90959375	-0.06241	-0.15223	-0.00291	-0.00194	-0.05543	-0.21538	-0.00512
1	91173159	91173502	-0.1426	-0.48819	-0.05725	-0.96108	-0.06245	-0.31037	-0.0564
1	93021624	93021753	1	-0.00034	-0.00072	-0.01609	-2e-05	-0.51551	0.57268
1	93184405	93184567	-0.06057	-0.10016	-0.033	-5e-05	-0.01963	-0.08218	-0.01526
1	94016895	94017039	-0.02015	-8e-05	-0.00126	-0.00398	-7e-05	-0.00132	-0.00021
1	94026945	94027069	-0.03006	-0.02447	-0.00063	-0.21453	-0.00018	-0.12923	-0.33172
1	94091956	94092072	-0.00225	-0.0002	-0.00053	-1e-05	-0.00039	-0.08275	-0.14027
1	94228755	94229008	-0.05306	-0.37608	-0.00433	-0.26695	-0.00029	-9e-05	-0.23694
1	94597930	94598064	-3e-05	0	-5e-05	-1e-05	-0.00072	-1e-05	-0.00151
1	95074855	95074994	-0.00374	-0.05022	-0.00072	-0.00735	-0.01517	-0.17924	-0.0218
1	95762759	95763077	-0.74567	-0.32711	-0.0287	-0.45397	-0.30929	-0.01055	0.61745
1	95882789	95882953	-0.09647	-0.01595	-0.08643	-0.0006	-0.00012	-0.02322	-0.45242
1	97077286	97077446	-0.31797	-0.02107	-0.05725	-0.28987	-0.00541	-0.08154	-0.18221
1	97222908	97223081	-0.06553	-0.14675	-0.00052	-9e-05	-2e-05	-0.01919	0.68851
1	97384727	97384988	-6e-05	-5e-05	-1e-05	-2e-05	-0.00116	-0.00084	-0.06527
1	97406448	97406585	-0.00943	-0.0826	-0.38679	-0.24644	-0.00985	-0.54131	-0.10042
1	97579086	97579256	-0.00271	-0.00942	-0.00172	-0.02875	-0.01884	-0.25179	-0.00052
1	97884908	97885107	-4e-05	-6e-05	-0.00131	-9e-05	-5e-05	-0.00644	0
1	98720654	98720856	-0.3722	-0.08516	-0.00186	-0.1766	-0.00158	-0.00051	-0.0869
1	98778054	98778195	-5e-05	-0.00017	-0.02099	-0.00254	-0.00397	-0.00018	-0.42119
1	98909553	98909722	-0.02244	-0.06053	-0.00244	-0.17027	-0.00856	-0.44634	-0.45273
1	99022752	99022875	-0.01519	-0.08161	-0.02103	-0.00405	-1e-05	-0.71218	0.61112
1	99071819	99071930	-1e-05	-0.01875	-0.00128	-0.01691	0	-0.79212	-0.46485
1	99098022	99098142	-0.0006	-0.00185	-0.00058	0.64949	-0.0033	-0.05883	-7e-05
1	99179585	99179697	-0.00085	-0.03892	-0.06677	-0.00277	-0.25031	-0.01673	-0.0874
1	101285985	101286105	-0.0012	-0.00129	0	-5e-05	0	-0.06789	-0.01085
1	102325250	102325488	-0.02693	-0.00496	1	-0.03764	-0.0012	1	0.96709
1	102423422	102423542	-0.05433	-0.01966	-0.01511	0.76375	-0.00528	-0.23738	-0.01062
1	102441829	102442012	0.99999	-0.08004	0	-0.65007	-0.27355	-0.89586	0.71814
1	102823252	102823365	-0.00629	-0.05797	0.99999	-0.05391	1	-0.01036	-0.08557
1	103710077	103710270	0	0	0	0	0	0	0
1	104047637	104047768	-0.0176	-0.12979	-0.00178	-0.01514	-0.00223	-0.00012	0.03139
1	105945981	105946096	1	0	1	-0.31634	-0.00626	-0.34349	-0.00139
1	106318818	106319005	-1e-05	-0.00066	0	-0.00232	-2e-05	0	-0.00022
1	106341632	106341739	0	0	-0.00029	-4e-05	0	-0.00016	0.99999
1	106388126	106388313	-0.01218	-0.02978	-0.0064	1	0.99999	-7e-05	-4e-05
1	106879985	106880399	-0.29878	-0.0314	-0.05473	-0.29241	-0.00525	-0.05495	-0.02332
1	106928549	106928680	0.99999	-0.00011	0	0	0	0	-2e-05
1	107093909	107094035	-0.00041	-0.00118	-0.00327	-3e-05	-0.00639	-0.25544	1
1	107139333	107139480	0.99999	-0.00376	-0.00097	-9e-05	-0.00211	-0.02429	-0.79698
1	108034661	108034783	-0.01489	-0.01029	0	-0.00099	-0.00085	-0.16488	-0.71614
1	108122769	108122874	-2e-05	-4e-05	-1e-05	-0.00024	-0.0001	-0.08462	-0.00508
1	108547613	108547996	-0.1124	-0.02839	-0.02506	-0.4242	-0.01113	-0.03528	0.7544
1	111064763	111064893	-0.04284	-0.0028	-0.01576	-0.0001	-0.00011	-0.10666	-0.0126
1	111147793	111148234	-0.18972	-0.50875	-0.00262	-0.00972	-0.14337	-0.85579	-0.35267
1	112219913	112220055	0.48349	-0.71453	-0.90662	-0.13423	-0.00411	-0.00306	-0.09616
1	112478155	112478257	-0.01952	-0.02176	0.73008	-0.13753	-1e-05	-0.09955	-0.31861
1	112497904	112498078	-0.20004	-0.11431	-0.00479	-0.00105	-0.29799	-0.4234	-0.79177
1	113940580	113940694	-0.03519	-0.05789	-6e-05	-0.07852	-0.00036	-0.00929	-0.05298
1	114068011	114068280	-0.83899	-0.1632	-0.10542	-0.33279	-0.04743	-0.71742	-0.04115
1	114984351	114984604	-0.80827	-0.33873	-0.02481	-0.01576	-0.01558	-0.05258	0
1	115340172	115340276	-0.00086	-0.00029	-1e-05	-0.01065	-0.00105	-0.01498	-0.01329
1	115737791	115738022	-0.01569	-0.00258	-7e-05	-2e-05	-5e-05	-0.07732	-0.0031
1	116733426	116733595	0	-2e-05	0	-1e-05	-0.00158	-0.00015	-0.00078
1	117171645	117171782	-0.28829	-0.13337	-0.00073	-1e-05	-5e-05	-0.0248	-0.40369
1	117789938	117790095	-0.00138	-0.01064	0	-0.0001	0	-0.00044	-0.03054
1	117796324	117796446	-0.00016	-0.0007	-0.00283	-0.00983	-0.04592	-0.03177	0.92036
1	117796456	117796615	-0.03121	-0.07564	-0.01342	-0.23915	-0.05265	-0.03188	-0.00276
1	117826792	117827023	-0.03841	-0.32185	-0.00844	-0.25293	-0.0585	-0.06018	0.74938
1	118703641	118703758	-0.03634	-0.00104	-0.03213	-0.0233	-4e-05	-0.25955	-0.17113
1	119102455	119102612	-0.35812	-0.1099	-0.27572	-0.00125	-0.30885	-0.04541	-0.00089
1	119605634	119605774	-0.0384	-0.00349	-0.01197	-0.00157	-0.02764	-0.28669	-0.08611
1	120355561	120355739	-0.03783	-0.01842	-0.74246	-0.00473	-0.01447	-0.98352	-0.00224
1	121114302	121114434	-0.00036	-0.01039	-0.00086	-0.03479	-0.00065	-0.00523	-0.0027
1	122280881	122281157	-0.00053	-0.12957	-0.0966	-0.10153	-0.01811	-0.02135	0.80821
1	122574067	122574223	-0.12217	-0.00435	-0.01444	-0.45545	-0.00185	-0.17066	-0.38368
1	123843594	123843735	-0.00373	-0.02187	-0.00023	-0.00703	-0.01557	-0.09944	-0.27601
1	125453077	125453288	-0.19066	-0.05516	-0.0077	-0.00809	-8e-05	-0.00382	-0.04761
1	125464008	125464147	0.90783	-0.30711	-0.00465	-0.06104	-0.03886	-0.1037	-0.00015
1	125517724	125517952	-0.0012	-0.0001	-0.00027	-0.00116	0	-0.00023	-0.07302
1	125544256	125544440	-0.00016	-0.0178	-0.00779	-0.00464	-0.02394	-0.01205	-0.17283
1	125608650	125608768	-0.01455	-0.01426	-0.00565	-0.0167	-0.02768	-0.01232	0.72731
1	126247855	126248187	-0.91404	-0.01802	-0.05407	-0.00023	-0.00293	-0.78226	-0.00931
1	126429405	126429599	-0.04168	-0.06171	-0.00075	-0.00135	-0.01157	-0.11013	-0.26988
1	126537457	126537558	-0.01086	-0.07444	-0.00293	-3e-05	-0.00328	-0.01133	-0.00158
1	126545215	126545380	-0.00142	0	-0.00048	-0.00075	-0.00095	-0.33302	-0.69049
1	126697642	126697750	-0.00035	-0.02328	-0.00177	-0.01313	-6e-05	-6e-05	-8e-05
1	127055360	127055559	-0.5912	-0.42649	-0.00072	-0.71999	-0.02059	-0.27939	-0.0151
1	128125592	128125708	-0.06166	-0.03118	-0.0033	-5e-05	-0.00834	-0.11946	-0.01116
1	129335915	129336080	-0.00057	-0.00186	-0.00112	-0.0181	-0.02768	-0.02333	-0.9598
1	129408579	129409111	-0.00766	-0.08655	-0.0238	-0.03065	-0.00417	-0.16829	-0.00339
1	129409160	129409299	-0.15125	0.66688	-0.1991	-0.23575	-0.0749	-0.45985	-0.03036
1	129529643	129530028	-0.06377	-0.14085	-0.03962	0.1677	-0.00522	-0.59568	-0.11088
1	129607339	129608377	-0.07226	-0.07667	-0.02943	-0.06705	-0.12764	-0.18341	-0.00036
1	129694143	129694302	0.91784	0.53614	-0.01137	-0.01613	-0.5789	-0.94741	0.71988
1	129729150	129729254	-0.02322	-0.03525	-0.05316	-0.02815	-0.00013	-0.03439	-0.19654
1	129832568	129832728	-0.02713	0.90904	-0.00268	-0.10747	-8e-05	-0.14537	-0.00632
1	129836344	129836447	-0.04964	-0.05487	0.99999	-1e-05	-0.00484	-0.81498	-0.62149
1	129836453	129836610	-4e-05	-1e-05	-0.31125	-7e-05	-0.01887	-0.14808	-0.35579
1	129880095	129880313	-0.02914	-0.0818	-0.23387	-0.62716	0	-0.16828	0.95024
1	129936561	129936661	-0.0078	-0.00386	-0.0013	-4e-05	-0.00529	-0.79414	-0.04184
1	129941806	129942109	-0.00072	-0.00037	-2e-05	-0.00202	-1e-05	-0.02664	-0.30193
1	129948370	129948583	-0.00895	-0.00076	-0.00208	-0.11744	-0.00167	-0.23517	-0.26318
1	130775196	130775531	-0.01741	-0.09807	-0.19258	-0.44634	-0.00468	0.83065	-0.20031
1	131680750	131680947	-0.03315	-0.28266	-0.03174	-0.00933	-0.0029	-0.03165	-0.07889
1	131713081	131713198	-0.00856	-0.10322	-0.21407	1	-0.00208	-0.00088	-1e-05
1	132744327	132744443	-0.00163	-0.03685	-0.02402	-0.0165	-0.00045	-0.49999	-0.0405
1	132759071	132759228	-0.07029	-0.1128	-0.00022	-0.33184	-0.05355	-0.39065	-0.09464
1	132800910	132801204	-0.30004	-0.57912	-0.31391	-0.14463	-0.15192	0.96485	-0.1036
1	132987592	132988132	-0.05294	-0.00128	-0.00717	-0.01753	-0.00032	-0.00247	-0.0427
1	133006607	133006717	-0.00109	-0.06058	-0.00033	-0.00241	-0.00032	-0.18332	-0.00172
1	133260334	133260446	-0.01638	-0.04486	-0.00117	0.91594	0	-0.00624	-0.74016
1	134189625	134189863	-0.01813	-0.02627	-0.00529	-0.00041	-0.00018	-0.00525	-0.0209
1	134240536	134240817	-0.21535	-0.77522	-0.03404	-0.12602	-0.00052	-0.43733	-0.34954
1	134358544	134358668	-0.08613	-0.00646	-0.03418	-0.0001	-0.00013	-0.33253	-0.14484
1	134364188	134364293	-0.02813	-0.18546	-0.1839	-0.01708	-0.00182	-0.45953	-0.00441
1	134379390	134379514	-0.06732	-0.0044	-0.00012	-0.0959	-0.18659	-0.38789	-0.29916
1	134395413	134395663	-0.00326	-0.00385	0	-0.01406	0	-0.00501	-0.02197
1	134397594	134397974	-0.00336	-0.57725	-0.02722	-5e-05	-0.00038	0.08195	0.09288
1	134418291	134418545	-0.29238	-0.51226	-0.02816	-0.00093	-0.06769	0.68776	0.20053
1	134446618	134446943	-0.00274	-0.00933	-0.00797	-0.00503	-0.00095	-0.00116	-0.09498
1	134451870	134452164	-0.03506	-0.08247	0.63962	-0.34193	-0.52191	-0.6522	-0.4482
1	134530801	134530940	-0.26254	-0.08108	-0.02517	-0.0056	-0.01105	-0.14836	-0.01173
1	134613421	134613603	-0.14522	-0.34955	0.50217	-0.01084	-0.05318	-0.02907	-0.00044
1	134641235	134641380	-0.00171	-0.00072	-0.28941	-0.02363	-0.00224	0.85032	-0.01234
1	134674817	134674924	-0.74553	-0.31743	-0.11222	-0.17196	-6e-05	-0.04641	-0.02972
1	134721207	134721430	-0.18703	-0.09074	-3e-05	-0.00919	0.98216	0.28272	-0.00456
1	134895102	134895302	-7e-05	0	0	-2e-05	0	-0.0006	-0.00031
1	134968692	134968844	-0.09697	-0.00644	-0.00077	-0.00037	-0.14457	0.59613	-0.0168
1	134987733	134987862	-6e-05	-0.00016	-0.00025	-0.0008	-2e-05	-0.00121	-2e-05
1	135010765	135010935	-0.2703	-0.01086	-0.00461	0.33053	-0.00632	-0.49451	-0.08118
1	135034399	135034611	0	0	-5e-05	-2e-05	0	-0.00591	-0.00556
1	135083083	135083728	-0.07963	-0.02927	-0.00192	-0.03568	-0.00075	-0.00194	-5e-05
1	135285102	135285209	-0.10333	-0.03571	-0.01659	-0.01772	-0.00276	-0.00353	-0.41862
1	135896200	135896310	-0.00073	-0.02456	-6e-05	-0.00094	-0.0009	-0.00158	-0.06868
1	136463834	136464037	-0.0331	-0.00226	-0.00812	-0.01074	-0.0315	-0.01178	-0.09443
1	137786676	137786777	-0.42347	-0.28358	-0.02404	-0.00691	-0.02812	0	-0.19229
1	138143623	138143891	-0.0966	-0.02954	-0.03356	-0.07301	-0.13569	0.18519	-0.00169
1	138317121	138317272	-0.08911	-0.17385	-0.00245	-0.13472	-0.0257	0.6239	-0.0025
1	138717595	138717709	-0.12184	-0.0514	-0.43179	-0.08332	-0.07745	-0.62082	-0.03228
1	138773636	138773746	-0.38009	-0.79933	-0.9721	-0.23029	-0.00683	-0.24219	0.4504
1	139516033	139516214	-0.0083	-2e-05	-0.01946	-0.00062	-0.19899	-0.4477	-0.08789
1	139567239	139567447	-0.47908	-0.01695	-0.01575	-0.26417	-0.06123	-0.01576	-0.50103
1	139595486	139595899	0.83702	-0.48257	-0.20852	-0.10471	-0.04818	-0.193	-0.03415
1	139638073	139638299	-0.30307	-0.055	-0.01804	-0.0654	-0.00025	-0.9355	-0.17149
1	139711395	139711583	-0.23455	-0.55732	0	0.75006	-0.00805	0.68143	-0.17727
1	139723810	139724087	-0.23242	-0.28859	-0.03134	-0.00104	-0.06588	-0.00339	-0.00112
1	139766295	139766753	-0.49092	-0.31163	-2e-05	-0.00051	-4e-05	-0.59177	-0.01338
1	139783483	139783668	-0.16731	-0.00021	-0.01309	-0.00075	-0.00493	-0.07252	-0.01459
1	139928289	139928515	-0.0087	-0.0001	-0.17715	-0.18977	-0.00031	-0.04714	-0.04562
1	140038117	140038343	-0.01154	-0.00016	-0.20181	-0.21594	-0.00044	-0.05564	-0.05233
1	140436444	140436767	-0.31815	-0.07319	-0.01393	-0.0154	-0.00423	0.78482	0.74427
1	141191302	141191498	-0.02653	-0.00699	0	-0.0001	-1e-05	-0.2217	-0.03723
1	141211089	141211238	-0.02647	-0.00291	-2e-05	-0.14226	-0.01748	0.16306	-0.04661
1	141737441	141737541	-0.00447	-0.0006	-0.00102	-0.0001	-3e-05	-0.00363	-0.14153
1	141738224	141738361	-0.00841	-0.30072	-0.06235	-0.00079	-0.25225	-0.02289	-0.63543
1	142392906	142393055	-0.02901	-0.08923	-0.06375	-0.00195	0	-0.01313	-0.12241
1	142439451	142439616	-0.00415	-0.0385	-0.00409	-0.10584	0	0.8453	-0.00282
1	142458064	142458176	0	0	0	0	0	0	-0.01137
1	143329290	143329491	-0.00077	-0.00016	-0.00093	-0.00101	-0.00021	-0.23017	-0.50248
1	143391336	143391595	-0.53222	-0.54237	-0.00452	-0.90612	-0.24692	0.91417	-0.58871
1	144135089	144135621	-0.18256	-0.09301	-0.27842	-0.84097	-0.00041	-0.45146	-0.0588
1	144199818	144199965	-0.09181	-0.37352	-0.00093	-0.44888	-0.0024	0.70137	-0.55362
1	144199999	144200110	-0.35983	-0.04569	-0.03526	-0.04822	-0.00715	-0.15867	-0.00201
1	144348959	144349217	-0.08685	-0.05009	-0.00096	-0.03498	0	-0.00033	-0.00262
1	144372732	144372854	-0.03226	-0.04161	-0.0002	-0.01184	-0.00165	-0.04439	-0.0276
1	144372876	144373115	-0.02712	-0.03356	-6e-05	-0.00675	-0.00452	-0.69672	0.83286
1	145205925	145206030	-0.00075	-2e-05	-0.00014	-0.01704	-0.13671	-0.00921	0.6033
1	145400782	145400944	-0.00018	-0.04137	-0.00117	-0.00065	-0.09722	-0.38491	-0.06025
1	145743510	145743641	-0.26707	-0.50041	-0.00174	-0.00424	-0.00052	0.8772	-0.19236
1	146283395	146283503	-0.00072	-0.08757	-0.00378	-0.01029	-0.00121	-0.18871	-0.00601
1	146312264	146312412	-0.00306	-0.58233	-0.02898	-0.0122	-0.00397	-0.92329	-0.0603
1	146707164	146707297	-0.00169	-0.05249	0	-0.00032	-0.15974	-0.06191	-0.544
1	146911627	146911762	-0.00029	-0.05168	-0.02895	-0.03898	-0.1154	0.53724	-0.42006
1	147734577	147734960	-0.04944	-0.00091	-0.01276	-0.11394	-3e-05	-0.07443	-0.76672
1	149167308	149167449	-0.03145	-0.24066	-4e-05	-0.00727	-0.00026	-0.01607	-0.01506
1	151260227	151260362	-0.00061	-0.00068	-0.00019	-2e-05	-0.00439	-0.02641	-0.00822
1	152711810	152711988	-0.00867	-0.00051	-0.00136	-0.00795	-0.00461	-0.59618	-0.18885
1	152749044	152749168	-0.25293	-0.38453	-0.00115	-0.07862	-0.00034	-0.01255	-0.49044
1	152759938	152760090	-0.04597	-0.00378	-0.00028	-0.01744	-1e-05	-0.94238	-0.95515
1	152848623	152849192	-0.37553	-0.54727	-0.04326	-0.08399	-0.00616	-0.49742	-0.07027
1	152873974	152874074	-0.01881	-0.88175	-0.5152	-0.11348	-0.035	-0.51922	-0.524
1	152940212	152940459	-0.13736	-0.10844	-0.00026	-0.07119	-0.00108	-0.10232	-0.13651
1	152942072	152942523	-0.07662	-0.00509	-0.01469	0.65106	-0.03493	0.9875	-0.0611
1	152975930	152976168	-0.9992	-0.79942	-0.01853	-0.00912	-0.00322	-0.29329	-0.884
1	153006495	153006847	-0.19424	-0.00642	-0.72204	-0.54102	-0.32957	-0.05226	-0.45077
1	153147952	153148054	1	1	0	-0.00226	0	-0.00335	-0.0408
1	153340039	153340139	-0.00861	-0.00505	0	-0.00026	-0.01842	-0.00614	-0.00123
1	153602550	153602708	-0.01502	-2e-05	-8e-05	-0.0004	-0.01616	-0.013	-0.00036
1	153628570	153628734	-0.04069	-0.0024	-0.0386	-0.00177	-0.02556	-0.00886	-9e-05
1	153672568	153672689	-0.19031	-0.08614	-0.09856	-0.45362	-0.04524	-0.62008	-0.73013
1	153701146	153701357	-0.00986	-0.01741	-0.0016	-0.40397	-0.11559	-0.24258	0.08381
1	154688649	154688844	-0.07489	-0.00869	-0.3113	-0.01859	-0.02278	0.14759	-0.22938
1	155290408	155290518	-0.30744	-0.04569	-0.00147	-0.00253	-0.00014	-0.00048	-0.07334
1	155320630	155320827	-0.008	-0.0966	-0.12834	-0.00149	-0.00105	-0.12419	-0.09032
1	156298370	156298545	-0.01832	-0.00739	-0.00939	-0.00613	-0.00689	-0.39855	-0.04896
1	156309026	156309206	-0.00464	-0.00282	-0.00795	-0.00207	-0.02403	-0.01798	-0.01259
1	156363644	156363790	-0.00335	-0.03563	-0.00127	-0.09109	-0.04007	-0.00178	-0.27534
1	156405532	156406102	-0.00182	-0.00115	-4e-05	-0.00784	-2e-05	-0.00584	-0.6911
1	156517843	156517953	-0.09491	-0.02311	-0.00019	-0.00701	-5e-05	-0.0163	0
1	156527638	156527958	-0.18103	-0.06779	-0.00317	-0.00913	-0.00211	-0.07281	-0.00066
1	156743428	156743738	-0.08726	-0.35922	-0.27773	-0.03392	-0.03548	-0.3843	-0.63404
1	156806416	156806517	-0.06898	-0.14577	-0.00903	-0.11655	0	-0.2685	-0.01593
1	156856617	156856762	-0.03023	-0.00528	-0.00092	-0.00017	0	-0.01028	-0.0004
1	159074328	159074442	-0.00172	-0.0002	-0.00297	-0.02482	-3e-05	-0.00594	-0.00071
1	159222094	159222451	-0.01414	-5e-05	0	-0.00206	-1e-05	-0.00941	-0.00694
1	159239227	159239347	-0.0226	-0.00926	-0.02784	-0.15716	-0.01827	0.39277	0.51321
1	159245292	159245507	-0.33449	-0.21739	-0.18661	-0.00054	-0.00855	-0.31766	-0.37526
1	159259077	159259284	-0.00444	-0.00147	-0.00084	-0.08693	-0.01552	-0.05479	-0.11976
1	159268324	159268533	-0.42139	-0.04183	-2e-05	-0.11256	-0.35872	-0.00476	0.78539
1	159408066	159408201	-0.07135	-0.00296	-0.02355	-0.08277	-0.00054	0.43368	-0.16156
1	161631245	161631506	-0.65877	-0.0765	-0.16041	-0.74073	-0.00538	-0.51736	-0.01168
1	162655697	162655809	-0.10649	-0.00925	-0.03135	-3e-05	-0.002	0.61325	-0.34401
1	163004985	163005101	0	0	0	-0.00027	-0.00431	-0.03037	-0.01027
1	163082740	163082955	0.78131	-0.47464	-0.00813	-0.00013	-0.14067	0.53994	0.43269
1	163103604	163103835	0	-8e-05	-0.00062	-0.00014	-6e-05	-0.02945	-0.0004
1	163178765	163178935	-0.00019	0	-3e-05	-1e-05	0	-0.01273	-0.96602
1	163376215	163376345	-0.0006	-0.00096	0	-0.00014	0	-0.01387	-0.06009
1	163426704	163426841	-0.15191	-0.35127	-0.00969	-0.01823	-0.01314	-0.11092	-0.06219
1	163515534	163515907	-4e-05	-1e-05	-4e-05	-1e-05	-0.00159	-0.00672	-0.32546
1	163720754	163720896	-0.02362	-0.00152	-0.00552	-0.00198	-0.25141	0.26369	-0.95109
1	163860137	163860299	-0.26799	-0.66384	-0.00255	-0.9798	-0.19895	0.19462	0.46667
1	163964962	163965089	-0.02368	-0.30791	-0.06383	-0.02935	-0.01401	-0.10214	-0.01484
1	163965147	163965253	-0.17748	-0.10772	-0.06864	-0.22806	-0.00358	0.5201	-0.09774
1	164936201	164936467	-1e-05	-0.00036	-2e-05	-0.00238	-0.00022	-0.71458	-0.03659
1	164968628	164969032	-0.09798	-0.11371	-0.00112	-0.04832	-0.28738	0.55841	0.99273
1	165003676	165003937	-0.00741	-0.00422	-0.00131	-0.03466	-0.00035	-0.00131	-0.42339
1	165174071	165174287	-0.09762	-0.00951	-0.03587	-0.02021	-0.00107	-0.00095	-0.09338
1	165199652	165199830	-0.2491	-0.52694	-0.74108	-0.55062	0	-0.35806	-0.26295
1	165209711	165209821	-0.13807	-0.03801	-0.00802	-0.00211	-0.00781	-0.00397	-0.03406
1	165386897	165387133	-0.08237	-0.00745	-0.00103	-0.0587	-0.64654	-0.09558	-0.05598
1	165407450	165407658	-0.44829	-0.40275	-0.05258	-0.00121	-0.02375	-0.13171	0.73936
1	165454850	165455128	-0.01016	-0.34825	-6e-05	-0.03521	-0.84044	0.38558	-0.63665
1	167033568	167033804	-0.09232	-0.0024	0	-0.00053	-0.00065	-0.00328	-0.13599
1	167034099	167034322	-0.00314	-0.0028	-0.0005	-8e-05	0	-0.23785	-0.08136
1	167197266	167197398	-0.00808	-0.11184	-0.31351	-0.0145	-0.00128	-0.00263	-0.03085
1	167266441	167266912	-0.87977	-0.11963	-0.0003	-0.00584	-0.00719	-0.13084	-0.1502
1	167301923	167302075	-0.00022	-2e-05	-0.00035	-5e-05	-3e-05	1	-1e-05
1	167500687	167500822	-0.63463	-0.45304	-0.10592	-0.0572	-0.00052	-0.38584	-0.15745
1	169544654	169544815	-0.00392	-0.01043	-0.0004	-0.07485	-0.02047	-0.19616	-0.19176
1	169598740	169599048	0.90544	-0.04199	-0.11688	-0.37358	-0.07317	-0.41707	-0.9458
1	169661173	169661280	-0.00795	-0.01217	-0.1552	-0.02512	-0.09611	-0.92554	-0.0006
1	169824136	169824337	-0.39671	-0.08109	-0.01102	-0.00646	-0.09573	-0.19667	0.01721
1	169929418	169929541	-0.01441	-0.1024	-0.00377	-0.00439	-0.23507	-0.76115	-0.01355
1	169944235	169944523	-0.01026	-0.00136	-0.01161	-0.05823	-0.00034	-0.39787	-0.10639
1	170487790	170487909	-0.50467	-0.36621	-0.03685	-0.30406	-0.01745	-0.01869	-0.04361
1	170823597	170823765	-2e-05	0	-0.00036	-0.00808	-1e-05	-1e-05	-0.1296
1	171040678	171040909	-0.08618	-0.14739	-0.19348	-0.04916	-0.00536	-0.09636	-0.18635
1	172360975	172361100	-0.28547	-0.10092	-0.00258	-0.00264	-1e-05	-0.61513	-0.35476
1	172398905	172399051	-0.00142	-0.00023	-0.00556	-0.05308	-0.01082	-0.15111	-0.34268
1	172644623	172644756	-0.24326	-0.01005	-0.00406	-0.03434	-0.00029	-0.58216	-0.58192
1	172856251	172856565	-0.00244	-0.02821	-0.00349	-9e-05	-0.00772	-0.24949	-0.00018
1	172937790	172937924	-3e-05	-0.0008	0	-0.00072	-0.11834	-0.10137	-0.06317
1	172940595	172940788	-0.01823	-0.24501	-0.01622	-0.00436	-0.00728	-0.36865	-0.14468
1	173192282	173192728	0.98559	-0.0682	-0.02022	-0.51783	-0.00835	-0.18645	-0.21442
1	173243846	173244054	-0.03719	-0.05844	-0.00136	-0.00474	-0.00026	-0.0129	-0.00034
1	173284452	173284605	-0.00648	-0.00271	-0.00045	-0.0023	-0.00237	-0.30833	-0.61778
1	173361576	173361805	-0.00074	-0.00104	0	0	0	-2e-05	-0.42973
1	173605278	173605427	-0.00208	-0.00392	-0.00089	-0.00105	-0.00071	-0.0193	-0.48399
1	175877421	175877571	-0.44296	-0.07721	-0.47001	-0.00037	-0.01054	-0.20516	0.44855
1	176014674	176014906	-0.0114	-0.00036	-1e-05	0	-1e-05	-0.01172	-0.013
1	177571208	177571308	-0.03015	-0.00514	-7e-05	-0.00044	-0.08464	-0.11664	-0.08669
1	177708857	177709140	-0.13799	-0.0626	-0.17463	-0.0826	-8e-05	-0.07166	-0.20619
1	178085236	178085373	-0.67137	-0.92257	0.99999	-0.00425	-0.29572	-0.30068	0.64991
1	178110010	178110160	-0.0423	-0.00892	-0.0828	-0.00023	-0.00767	-0.04595	-0.02476
1	178111690	178112154	-0.15113	-0.6029	-0.00273	-0.16033	-0.23838	0.81146	-0.57941
1	178115366	178115472	-0.00423	-0.01025	-5e-05	-0.00208	-0.00425	-0.1042	0.97052
1	178130521	178130736	-0.00297	-0.0015	-0.02221	-0.18447	-0.00514	-0.18583	-0.00078
1	178132602	178132715	-0.00024	-3e-05	0	-0.00068	-4e-05	0	-0.00073
1	178137910	178138023	-0.02997	-0.04257	-0.00079	-0.00658	-0.03745	-0.04113	-0.25563
1	178197561	178197756	-0.15676	-0.08212	-3e-05	-0.00615	-0.07333	-0.06983	-0.40265
1	178220113	178220254	-0.0259	-0.01288	-0.00343	-0.00325	-0.00439	-0.00087	-0.39788
1	178300530	178300652	-0.19585	-0.00049	-0.01638	-0.21966	-0.88892	-0.37543	-0.0728
1	178363450	178363662	-0.85955	-0.27073	-0.19361	-0.00035	-0.85843	-0.77565	-0.33463
1	178446593	178446732	-0.00411	-0.00033	-0.00017	-0.00174	-0.00129	-0.05463	0.5458
1	178452355	178452484	-0.00757	0.84351	-0.72877	-0.15214	-0.03084	0.76287	-0.18437
1	179105371	179105596	-0.41111	-0.08276	-0.0006	0	-0.00053	-0.01335	0.54361
1	179254140	179254358	-0.59269	-0.84801	-0.00531	0.32087	-0.1874	-0.87966	-0.51617
1	179813023	179813216	-0.02431	-0.00176	-0.00204	-0.00205	-0.00687	-0.17181	-0.01001
1	179823959	179824146	-0.06805	-0.06235	-0.62534	-0.09034	-0.02921	-0.13504	-0.04565
1	179852222	179852338	-0.3526	-0.00564	-0.00079	-0.39246	-0.00309	-0.21274	-0.17424
1	179949227	179949335	-0.0093	-0.0547	-1e-05	-0.00804	-0.01647	-0.20784	0.62808
1	181886103	181886292	0.83728	0.25394	-0.26787	-0.32781	-0.13701	-0.96853	-0.03636
1	182791329	182791537	-0.03042	-0.4236	-0.0116	-0.02933	-0.17396	-0.00754	-0.05704
1	182867949	182868070	-0.06506	-0.02533	-0.00875	-0.00646	-0.03635	-0.07082	-0.85907
1	183107575	183107683	-0.01536	-0.01507	-0.00315	-0.81154	-0.00018	-0.04379	-0.0233
1	183848216	183848337	-0.00048	-0.00497	-0.01982	-0.00371	-0.06753	-0.00013	-0.70767
1	184078364	184078617	-0.07413	-0.02989	-0.00019	-0.04331	-0.00564	-0.68703	-0.00331
1	184641366	184641511	-0.17733	-0.03889	-0.06365	-0.00025	-0.16927	-0.37589	-0.27498
1	184732499	184732800	-0.02579	-0.22425	-0.02399	-0.54583	-8e-05	-0.95708	-0.58773
1	184879092	184879335	-0.42126	-0.21145	-0.08578	-0.91921	-0.1193	-0.96119	0.97504
1	185100406	185100630	-0.04077	-0.0003	0	-2e-05	-4e-05	-0.03307	-0.33694
1	186519998	186520535	-0.00112	-1e-05	0	-0.00031	-5e-05	-0.01399	-0.00097
1	186725225	186725484	-0.32774	-0.02917	-0.089	-0.00418	0	-0.09972	-0.73623
1	186735152	186735411	-0.32774	-0.02917	-0.089	-0.00418	0	-0.09972	-0.73623
1	186785839	186786019	-0.0075	-5e-05	-0.00291	-0.08398	-0.09608	-0.01527	-0.00399
1	186899369	186899551	-0.00385	-0.00057	-1e-05	-1e-05	-0.00041	-0.10588	-0.03026
1	187427788	187427913	-0.01839	-0.01566	-0.00076	-0.25714	-0.0023	-0.04086	-0.0021
1	187530417	187530521	-0.06643	-0.08099	-0.06713	-0.42386	-0.01218	-0.0004	-0.0004
1	187558895	187559049	-0.44449	-0.10001	-0.00113	-0.10827	-0.01549	-0.1678	-0.88789
1	187591777	187591907	-0.0012	-0.00243	0.99999	-0.0003	0	-0.00057	-0.05391
1	188831941	188832078	-0.08352	-0.01184	-0.0003	-0.00915	-0.00333	-0.35817	0.98869
1	189207067	189207181	-0.02632	-0.00174	-0.00742	-0.05495	-0.30549	-0.17147	-0.1313
1	190185019	190185120	-5e-05	-5e-05	-0.0001	-4e-05	-0.00045	-0.00016	-0.06699
1	190205792	190205955	-0.16434	-0.4109	-0.00133	-0.00957	-0.00799	-0.01614	-0.1034
1	190606547	190606721	-0.63081	-0.58293	-0.03021	-0.02601	-0.00423	-0.29256	-0.00096
1	190742847	190742969	-0.00078	-0.03976	-0.00056	-0.00056	-0.00211	-0.1619	-0.48915
1	190919320	190919423	-0.07775	-0.02216	-0.00269	-0.17342	-0.00688	-0.24341	-0.01138
1	190983316	190983451	-0.04621	-0.00426	-0.00041	-0.0043	-0.00106	-0.0015	-0.04301
1	190998300	190998434	-0.07562	-0.0961	-0.00077	-0.33662	-0.0022	-0.4623	-0.0693
1	191200376	191200575	-0.00157	-0.00091	-0.00447	-0.00345	-0.10684	-0.03373	-0.04038
1	191538511	191538685	-0.0072	-0.28099	0	-0.03197	-0.00121	0.29333	0.07467
1	192021590	192021710	-0.06097	-0.36718	-0.056	-0.06702	-0.01181	-0.4423	-0.0795
1	192047203	192047442	-0.18295	-0.42994	-0.00497	-0.19105	-0.46414	-0.11896	-1e-05
1	192073962	192074076	-0.0078	-0.0092	-0.00164	-0.28341	-0.00508	-0.04053	-0.049
1	192196267	192196527	-0.02642	-0.00444	-0.00337	-0.0014	-8e-05	-0.01688	-0.00042
1	192216191	192216427	-0.00037	-0.0326	-0.00306	-0.04528	0	0.66046	-0.2962
1	192346919	192347078	-0.02442	-0.00012	0	-0.01732	-0.01534	-0.20887	-0.03688
1	192508055	192508556	-0.00238	-0.00022	-0.00061	-0.00024	-0.01504	-0.23844	-0.01526
1	192537736	192537967	-0.00479	-0.02397	-0.00262	-0.62109	-0.046	-0.26381	-0.08218
1	192578278	192578380	0	0	0	0	0	-0.27251	-0.1563
1	192615733	192616119	-0.02126	-0.00079	-5e-05	-0.00163	-4e-05	-0.10734	-0.00073
1	193741420	193741559	-0.30395	-0.00222	-0.00113	-0.00157	-0.0001	-0.05424	-0.01407
1	193748057	193748204	-0.0066	-0.00025	0	-0.01027	0	-0.00775	-4e-05
1	193838885	193839207	-0.07365	-0.38687	-0.00381	-6e-05	-0.0001	-0.28238	0.27595
1	193840254	193840383	-0.02604	-0.03375	-0.00086	-0.01069	-0.01354	-0.00435	-0.00305
1	193875502	193875682	1	-2e-05	0.99999	-0.00011	-5e-05	-8e-05	0
1	193945384	193945493	-0.00293	-0.00025	-6e-05	-0.00088	0	-0.00733	-0.02703
1	193947894	193948191	-0.0001	-0.00011	-0.00023	-0.00472	-0.00193	-0.0958	-0.00307
1	193979492	193979736	-0.45323	-0.40626	-0.00855	-0.33928	-0.0228	0.24488	-0.0262
1	193984452	193984553	-0.0929	-0.12449	0	-0.00577	-0.0006	-0.12034	-5e-05
1	194019893	194020093	-0.00011	-0.0001	0	-0.08995	-5e-05	0.53857	-0.00328
1	194035957	194036173	-0.00085	-0.00021	-2e-05	-0.01568	-0.00014	-0.00598	-0.19269
1	194052848	194053228	-0.00042	-0.00247	0.99997	-0.02026	0.99997	-0.00143	0
1	194092310	194092468	-0.29359	-0.34079	-0.00141	-0.14637	-0.00112	-0.00446	-0.02515
1	194105866	194106031	-2e-05	-4e-05	-5e-05	-0.00021	-1e-05	-0.00019	-0.00099
1	194114555	194114679	-0.02867	-0.01419	-0.00083	-0.07168	-0.00147	-0.01482	-0.03229
1	194124818	194125045	-0.00119	-0.00952	0	-0.18838	-0.00124	-0.26336	-0.00087
2	229344	229444	-0.00015	-0.00017	-0.00283	0	-4e-05	-0.0364	-0.00707
2	2211514	2211805	0	0	0	0	0	0	1
2	2218892	2219180	0	0	0	0	0	0	1
2	2475831	2476041	0	0	0	0	-0.00187	-0.08087	0.2546
2	2869934	2870052	-0.03417	-0.02105	-0.01153	-0.01098	-0.07928	0	-2e-05
2	3341582	3341773	0	0	0	0	0	0	1
2	5390630	5390777	-0.04959	-0.32209	-0.0294	-0.00423	-0.07525	-0.07083	-0.67596
2	5557499	5557622	-0.03203	-0.01732	-0.02305	-0.00483	-0.13376	-8e-05	-0.00983
2	6008272	6008388	-0.01282	-0.01288	-1e-05	-7e-05	0	-0.00236	-0.00036
2	6019896	6020042	-0.04095	-0.01724	-0.00218	-0.00484	-0.0452	-0.00178	-0.20236
2	6253944	6254078	-0.0002	-2e-05	-5e-05	-0.00025	-1e-05	-0.00552	-0.00707
2	6645888	6646020	-0.00065	-0.00066	-0.00171	-0.0037	-0.0039	-0.45971	-0.09414
2	6816586	6816692	-0.43338	-0.01729	-0.45586	-0.04397	-0.00027	-0.62314	-0.00277
2	7337935	7338089	-0.0005	-0.00016	-0.00026	-0.00883	-0.33687	-0.31554	-0.59751
2	7734403	7734511	-0.01133	-0.01222	-0.04254	-0.00013	-1e-05	-0.03296	-0.41097
2	8172661	8172955	-0.64697	-0.80901	-0.09166	-0.14203	-0.05743	-0.11349	-0.23593
2	8269553	8269981	-0.00051	-0.00023	-0.0203	-0.00058	-0.00018	-0.02913	-0.45728
2	8294537	8294683	-0.01254	-0.00011	-0.00031	-0.00025	-0.00025	-0.00744	-0.24062
2	8453183	8453465	-4e-05	-0.0002	0	-0.00123	-0.00071	-0.14711	-0.045
2	9007707	9007818	-5e-05	-1e-05	0	-4e-05	-1e-05	-0.05507	-0.08738
2	9019686	9019866	-2e-05	-0.00023	-9e-05	-0.00031	-2e-05	-0.00028	-1e-05
2	9086711	9087240	-0.2181	-0.51168	-0.10058	-0.25786	-0.06651	-0.01387	-0.19407
2	9164571	9164749	0	0	0	-0.04683	-9e-05	-0.12492	-0.61633
2	9193824	9194144	-0.00178	-0.0002	0	0	0	0	-2e-05
2	9260588	9260789	-0.00175	-0.09139	-0.00185	-0.00126	-0.12242	-0.2277	-0.05806
2	9539441	9539704	-0.08358	-0.00017	-3e-05	-9e-05	-0.00019	-0.14252	-0.79461
2	9779592	9779693	-0.0373	-0.63255	-0.15358	-0.10241	-0.0002	-0.4724	-0.03234
2	9992156	9992297	-0.00037	-0.00145	-0.00028	-0.00254	-0.00066	-0.01292	-0.00039
2	10736362	10736504	-0.00022	-0.00165	-0.00231	-0.00254	-0.00197	-0.00322	-0.00214
2	10736643	10737102	-7e-05	-0.00012	-0.00924	-0.0051	-0.00211	-0.23583	-0.68968
2	12546324	12546435	-0.31857	-0.11812	-0.11596	-0.01638	-0.03441	-0.28915	-0.07099
2	12701383	12701491	-0.00192	-0.00639	-0.00794	0	-0.00593	-0.11486	-0.18021
2	12701596	12701711	-0.7018	-0.64704	-0.0919	-0.49848	-0.15503	-0.62912	-0.00193
2	12746156	12746275	-0.01426	-0.00274	-0.07524	-0.15392	-1e-05	0.44486	-0.1265
2	12824922	12825129	-0.00138	-0.0012	-0.00045	-0.01716	-0.03391	-0.35044	-0.09078
2	13064886	13064995	-4e-05	-8e-05	-6e-05	0	-0.02988	0.51331	0.66861
2	13350225	13350397	-0.19159	-0.02858	-0.00042	-0.00317	-0.00052	-0.06456	-0.60196
2	13385748	13386037	-0.44823	-0.09844	-0.01725	-0.09299	-0.00022	-0.00896	-0.00118
2	13441134	13441277	-0.11199	-0.00703	-0.0092	-0.09651	-0.00267	-0.02268	0.98456
2	13501276	13501382	-0.15732	-0.01483	-0.00396	-0.11262	-0.00302	-0.29621	0.98798
2	13520252	13520572	-0.11437	-0.08478	-1e-05	-0.00018	-0.00488	-0.02513	-0.00279
2	13534429	13534602	-0.01053	-0.00164	-0.00025	-0.01366	-0.00185	-0.01534	-0.00986
2	13556803	13557215	-0.08505	-0.02219	-0.03282	-0.07286	-0.00295	-0.31831	-0.10572
2	13663888	13664065	-0.50055	-0.11967	-0.03571	-0.10211	-0.30251	-0.24733	-0.74231
2	13690294	13690641	-0.00467	-0.00827	-0.00094	-5e-05	-0.00375	-0.04931	-0.04218
2	13789182	13789302	-0.31431	-0.02331	-3e-05	-0.00363	-0.01647	-0.00329	-0.00077
2	13844638	13845034	0.65959	-0.62111	-0.11566	-0.51285	-0.00019	-0.00314	-0.1034
2	13884454	13884584	-0.21944	-0.11235	-0.06018	-0.00724	-0.01612	-0.00395	-0.02226
2	13948223	13948401	-0.04454	-0.15026	-0.02929	-0.01191	-0.0005	-0.0195	-0.01443
2	14502964	14503129	-0.1001	-0.30196	-0.21556	-0.02485	-0.06986	-0.15088	-0.24628
2	14554913	14555164	-0.01189	-0.00199	-4e-05	0	-4e-05	-0.18872	-0.0009
2	14660761	14660880	-0.02895	-0.00528	-0.03695	-0.11572	-0.00158	-0.07951	-0.01151
2	14693091	14693336	-0.00556	-0.00685	-0.01181	-0.00054	-4e-05	-0.00018	-0.03091
2	14890094	14890298	-0.01392	-0.07933	-0.00012	-0.0031	-0.00278	-0.06792	-0.02674
2	15081436	15081572	-0.48723	-0.18757	-0.06822	-0.00486	-0.00144	-0.11489	-0.10988
2	15273202	15273318	-0.03706	-0.00593	-0.00012	-0.00362	-0.01082	-0.32077	0.37979
2	15648133	15648239	-0.01726	-0.17442	-0.08063	-2e-05	-0.04552	0.98367	-0.98991
2	15648328	15648508	-0.01092	-0.02314	-0.00229	-0.01772	-0.29183	-0.42978	-0.00139
2	15707486	15707649	-0.01206	-0.00157	-0.03678	-0.40806	-0.00674	-0.81564	-0.42894
2	15812680	15812914	-0.04838	-0.00441	-0.06888	-0.01594	-0.0147	-0.89693	-0.01522
2	15833979	15834107	-0.19931	-0.12815	-0.00011	-0.00031	-0.00011	-0.12861	-0.01829
2	16331014	16331322	-0.02431	-0.03247	-0.00182	-0.00032	-0.004	-0.17797	0.54858
2	16738277	16738408	-0.02509	-0.00174	0	-0.04823	-0.00244	-0.09724	-0.47888
2	17006962	17007151	-0.11833	-0.12238	-0.00746	-0.00141	-0.01868	-0.0222	-0.02455
2	17055112	17055213	-0.00103	-0.00036	-0.00055	-0.92336	-0.10961	-0.00686	-0.00095
2	17121191	17121358	-0.04993	-0.02169	-0.04766	-0.6655	-0.036	-0.02371	-0.02957
2	17255750	17255938	-0.00117	-0.02171	-0.04533	-0.00099	-0.394	-0.02613	-0.03991
2	17449874	17449996	-0.07196	-0.36697	-0.28875	-0.53052	-0.57041	-0.91416	-0.34649
2	17465571	17465769	-0.22627	-0.11221	-0.00826	-0.0002	-0.00051	-0.95342	-0.26855
2	17481621	17481916	-1e-05	0	0	0	-1e-05	-0.004	-0.44745
2	17730703	17730865	-0.10845	-0.04186	-0.086	-0.02042	-0.11769	0.96058	-0.00018
2	17732685	17732813	-0.00344	-0.01136	-6e-05	-1e-05	-0.00045	-0.17928	-3e-05
2	17783230	17783683	-0.01649	-0.03372	-0.00871	-0.00551	-0.21726	-0.76182	-0.61057
2	18965259	18965365	-0.00683	-0.02427	-7e-05	-2e-05	-0.00596	-0.02158	-0.51254
2	19944031	19944142	-0.12961	-0.04248	-0.02056	-0.14083	-0.07897	-0.02478	-0.8015
2	20121231	20121351	-0.35051	-0.11946	-0.71478	-2e-05	-0.00779	-0.02498	-0.12587
2	20194982	20195104	-0.12902	-0.91834	-0.06085	-0.89932	-0.00231	-0.04461	0.31517
2	20388868	20388985	-0.08563	-0.05026	-0.04063	-0.11306	-0.00185	-0.18068	0.05246
2	21578568	21578786	-0.0632	-0.00149	-0.00202	-0.00036	-0.00499	-0.00023	-0.00158
2	22195746	22195999	-0.00064	-0.1413	-0.00994	-0.18237	-0.15622	-0.02087	-0.15211
2	22196086	22196232	-1e-05	-5e-05	-5e-05	-0.00045	-8e-05	-0.11735	0.23344
2	22309183	22309306	-0.75068	-0.50647	-0.02235	0.71056	0.70065	-0.1584	-0.93647
2	22332532	22332785	-0.64314	-0.07779	-0.03664	-0.4912	-0.00675	-0.00204	-0.04451
2	22365380	22365502	-0.08555	-0.09828	-0.05792	-0.04482	-0.00207	-0.0448	-0.00773
2	22765551	22765712	-0.00728	-0.01629	-0.02449	-0.00494	-0.08551	-0.91109	0.48867
2	22771631	22771754	-0.01296	-0.5105	-0.00128	-0.00191	-4e-05	-0.06972	-0.08477
2	22775080	22775303	-0.04095	-0.03127	-0.00072	-6e-05	-0.00115	-0.00212	-0.55022
2	22802743	22802936	-0.01261	-0.0009	-0.04093	-0.00142	-0.03055	-0.53054	-0.24892
2	23590640	23590753	-0.07819	-0.04961	-0.03433	-0.03711	-0.00045	-0.68286	-0.353
2	24065994	24066128	-0.00095	-0.00259	0	-1e-05	0	-0.61939	-0.33846
2	24091795	24091959	-0.00032	-0.18847	-0.49401	-0.01709	-0.00861	-0.00727	-0.21867
2	24117051	24117413	-8e-05	0	-0.00025	-0.00114	-0.00016	-5e-05	-0.0755
2	24490913	24491119	-0.42521	-0.00937	-0.1043	-0.03417	-0.02613	0.17982	-0.071
2	24572837	24572984	-0.00863	-0.02159	-0.00173	-0.013	-0.01276	-0.00151	-0.07986
2	24964445	24964632	-0.34486	-0.07257	-0.00031	-0.00614	-0.00017	-0.03177	-0.00035
2	25214017	25214228	-0.11455	-0.55824	-0.02401	-0.2427	-0.01682	0.2983	0.56452
2	25249138	25249269	-4e-05	-0.03005	-0.06192	-0.00865	-0.10776	-0.08745	-0.3259
2	25550024	25550221	-0.12338	-0.432	-0.0002	-0.04296	-0.00347	-0.82913	0.81654
2	25586157	25586268	-0.26273	-0.06802	-0.10945	-0.09391	-0.28142	-0.13943	-0.23213
2	25733835	25734046	-1e-05	-0.00073	-0.00291	-0.09248	-0.00058	0.64246	0.75546
2	25758363	25758574	-0.0421	-0.11688	-0.26609	-0.29337	-0.15096	-0.00803	-0.5596
2	25795407	25795516	-0.01982	-0.01155	-0.00794	-0.00014	-0.00417	-0.06313	-0.08274
2	25982447	25982553	0	-9e-05	-1e-05	-0.00372	0	-0.11141	0
2	25993980	25994203	-0.015	-0.00223	-0.0032	-2e-05	-0.01221	-0.60391	-0.06829
2	26038856	26039079	-0.31793	-0.32853	0	-0.00831	0	0.67678	-0.20624
2	26045437	26045591	-0.19932	-0.04291	-0.05137	-0.00119	-0.0196	-0.46217	0.73535
2	26261364	26261516	-0.82731	-0.5527	-0.0488	-0.29152	-0.97645	-0.06038	-0.33803
2	26376689	26376805	-2e-05	-0.00056	-0.01062	-0.01207	-0.01572	-0.47969	-0.03888
2	27274151	27274279	-0.00024	-0.00026	-3e-05	-0.00977	-0.00095	-0.09869	-0.01153
2	27279217	27279345	-0.87443	-0.67671	-0.03973	-0.0005	-0.00011	-0.00486	-0.00027
2	27401168	27401338	-0.00011	-0.00073	-0.00194	-0.00011	0	-0.00085	-0.00394
2	27401500	27401692	0	0	0	0	0	-0.01001	-0.01121
2	27423485	27423594	-0.39132	-0.27944	-0.00018	-0.20343	-0.30642	-0.31319	-0.13164
2	27457583	27457744	-0.00126	-0.00047	-2e-05	-0.01304	-5e-05	-0.18465	-0.0488
2	27551992	27552465	-0.18105	-0.03997	-0.21082	-0.00357	-0.02589	-0.01994	-0.61229
2	27559797	27559909	-0.00589	-0.00022	-0.00121	-0.00039	-2e-05	-0.00086	-0.00323
2	27579405	27579754	-7e-05	-0.00089	-0.00067	-0.00571	-0.00126	-0.03887	-0.00234
2	27644249	27644376	-0.00027	-0.00548	0	-0.0006	-0.01029	-0.49318	-0.03405
2	27679625	27679742	-0.00012	-0.03798	-0.00023	-0.38216	-0.00334	-0.0016	-0.00244
2	27902252	27902361	-0.00145	-0.00336	-0.02723	-0.00548	-0.16797	-0.03853	-0.08203
2	27981915	27982029	-0.64794	-0.47565	-0.49122	-3e-05	-0.00011	-0.06724	-0.01325
2	28091292	28091419	-0.00845	0.99999	-0.77388	-0.09197	-0.01354	-0.5226	-0.00932
2	28130396	28130812	-0.13237	-0.36672	-0.02088	-0.10367	-0.21288	-0.66732	-0.00075
2	28132940	28133241	-0.00201	-0.06018	-0.00039	-0.00407	-0.00894	-0.01378	-0.00653
2	28138724	28138857	-2e-05	-1e-05	-0.0385	-0.00613	-0.00011	-0.07893	-0.01177
2	28219639	28219980	-0.01619	-0.14288	-6e-05	-0.01152	-0.00944	-0.06242	-0.07132
2	28250293	28250439	-0.16458	-0.00986	-0.08121	-0.3098	-0.03804	-0.00689	-0.00085
2	28275705	28275938	-0.9223	0.83833	-0.00024	-0.00017	-0.01413	-0.05695	-0.1684
2	28303324	28303508	-0.00019	-0.00718	-0.00026	-0.03885	-0.00215	-0.03463	0.79833
2	28318612	28318783	-0.14087	-0.08661	-0.18229	-0.00091	-0.18059	-0.54976	-0.27691
2	28339498	28339870	-0.00071	-0.09898	-0.00028	-0.06272	-0.00011	-0.37589	-0.19221
2	28476479	28476630	-0.00104	-0.03247	-0.00019	-0.01041	-0.00095	0.97643	-0.23349
2	28715958	28716081	-0.04846	-0.01769	-0.0408	-0.03174	-0.0498	-0.14305	-0.01902
2	28763888	28764313	0	-1e-05	0	0	0	-0.04043	-0.30441
2	29288216	29288325	-0.07809	-0.39959	-0.30064	-0.04766	-0.03816	-0.42505	-0.08782
2	29288372	29288522	-0.08969	-0.03033	-0.0955	-0.02441	-0.02578	-0.1403	-0.09173
2	29288539	29288657	-0.03544	-0.01596	-0.00069	-0.00419	-0.10837	-0.30752	0.86188
2	29578295	29578425	-0.00137	-0.07332	-0.02636	-0.04823	-0.01033	-0.59961	-0.02479
2	29627184	29627296	-0.0013	-0.01602	-0.00113	-0.03887	-0.02921	-0.8814	-0.24729
2	29639329	29639506	-0.00071	-0.02121	0	-0.00054	-0.0009	-0.00263	-0.02343
2	29660927	29661278	-0.21906	-0.0667	-0.00984	-0.02382	-0.02439	0.71234	-0.0891
2	29679608	29679763	-9e-05	-0.00654	-0.00652	-0.0015	-0.00595	-0.01229	-0.60075
2	29734605	29734887	-0.01041	-0.00067	-5e-05	-0.0318	-0.0011	-0.15904	-0.16098
2	29746456	29746575	-0.17643	-0.53059	-0.01006	-0.44784	0.84949	-0.0729	-0.09253
2	29774504	29774634	-0.00505	-0.02014	-0.05603	-0.12228	-0.01027	-0.13661	-0.0277
2	29783097	29783374	0.99998	-0.15431	-0.0029	-0.00019	-0.00011	-8e-05	-0.07006
2	29798602	29798775	-0.00469	-0.00469	-0.00422	-0.00049	-0.00307	-0.04168	-0.00109
2	29881887	29882064	-0.02292	-0.0166	-0.00346	-0.00181	-0.00055	-0.16599	-0.19498
2	30083283	30083416	-0.03082	-0.00339	0	-8e-05	-1e-05	-0.00069	-0.00096
2	30114095	30114585	-0.08394	-0.59257	-0.00019	-0.18582	-0.04358	-0.47892	-0.00022
2	30278696	30278955	-0.05379	-0.00838	-6e-05	-0.00127	-0.00013	-0.00062	-0.00038
2	30304684	30305665	-0.00334	-0.20504	-0.00275	-0.01115	-0.0001	-0.17747	-0.52783
2	30323527	30323689	0	0	0	-0.00021	0	-0.00201	-0.00023
2	30422667	30422819	-0.01031	-0.00059	-0.0008	-0.03477	-0.01802	-0.15907	0.24058
2	31355296	31355505	-0.0287	-0.05399	-0.07396	-0.38593	-0.73066	-0.72408	-0.57802
2	32318056	32318484	-0.00026	-0.00188	-5e-05	-0.07796	-0.00042	-0.20797	-0.00773
2	32452427	32452813	-0.00132	-4e-05	0	-0.00078	-1e-05	-0.00036	-0.05319
2	32476613	32476757	-5e-05	-0.00295	-0.00022	-0.52326	-1e-05	-0.58557	-0.1346
2	32567612	32568175	-0.07238	-0.33584	-0.0097	-0.06875	-0.00403	-0.4084	-0.07462
2	32675581	32675712	-0.02411	-0.00139	-0.00233	-0.01018	-0.11075	-0.12262	-0.307
2	32675931	32676042	-3e-05	-0.00015	-0.00036	-8e-05	-1e-05	-0.02554	-0.45869
2	32885059	32885233	-0.00024	-0.00046	0	-0.00489	-3e-05	-0.00475	-0.19151
2	32892696	32892983	-0.00988	-0.1324	-0.00052	-0.00013	-0.00038	-0.42	-0.14228
2	32980822	32980953	-0.01472	-0.00294	-0.0047	-0.06257	-0.00015	1	-0.7925
2	33032095	33032218	-0.22681	-0.24095	-0.79192	-0.20121	-0.00282	-0.04747	-0.16635
2	33297274	33297396	-0.00018	-0.00215	0	-0.03556	-0.01563	-0.04398	-0.23938
2	33351169	33351320	-0.01233	-0.01797	-0.00372	-0.00374	-0.00563	-0.17047	-0.0053
2	33382484	33382585	-0.00186	-0.00345	1	-0.00293	-0.09585	-0.24493	0.60151
2	33412479	33412635	-0.01517	-3e-05	1	0	-4e-05	-0.05537	-0.00106
2	33443668	33443839	-0.02942	-0.00932	-0.04536	-0.08757	-0.123	-0.22967	-0.0689
2	33468260	33468469	-0.28231	-0.0243	-0.02834	-0.4908	-0.00069	-0.10521	-0.22939
2	33511395	33511595	0.89923	-0.88516	-0.02266	-0.09698	-0.0212	0.08329	-0.43442
2	34722039	34722145	-0.00183	-2e-05	-1e-05	0	-0.00319	-0.54175	-0.94949
2	34988110	34988450	-0.24001	-0.29422	-0.0581	-0.27858	-0.87571	-0.00735	-0.05804
2	35064347	35064493	-0.02246	-0.09908	-0.00118	-0.00088	-0.00399	-0.01867	-0.00199
2	35131349	35131457	-0.22809	-0.06166	-0.0134	-0.00696	-0.00025	-0.02594	-0.03415
2	35131635	35131968	-0.00015	-0.00013	0	-0.1373	-0.00543	-0.00059	-0.09958
2	35134930	35135046	-0.00342	-0.35091	-0.34997	-0.01532	-0.00155	-0.02092	-0.11951
2	35206354	35206825	-0.0974	-0.25287	-0.01585	-0.00281	-0.00609	-0.24219	-0.3116
2	35416952	35417350	-0.00059	-0.01451	-0.02506	-0.45827	-0.18348	-0.25777	-0.00354
2	35463607	35463753	-0.00644	-0.00842	-0.00153	-0.00144	-0.52415	-0.15185	-0.11641
2	35466479	35466705	-0.03319	-0.0423	-0.03384	-0.0008	-0.00413	-0.25068	0.85107
2	35497969	35498123	-0.21346	-0.01425	-0.03743	-0.00066	-0.27249	-0.16475	-0.42239
2	36127703	36127916	0	-9e-05	-0.00057	-0.00051	-0.00019	-0.00112	-0.02445
2	36384381	36384582	-0.44305	-0.26558	-0.00576	-0.02716	-0.02721	-0.16313	-0.25462
2	36400757	36401066	0.84123	-0.017	-0.0517	-0.0262	-0.01899	-0.87501	-0.02239
2	36418902	36419094	-0.03162	-0.05082	-0.00134	-0.00427	-0.11617	-0.36482	-0.36856
2	37425078	37425179	-0.00037	-0.00096	-0.00052	-4e-05	-0.00063	-0.00328	-0.0269
2	37897306	37897866	-0.00068	-0.00037	0	-0.0012	-0.00022	-0.03325	-0.00137
2	38014530	38014896	0	0	0	0	0	0	0
2	38527895	38528070	-0.04735	-0.30117	-0.5475	-0.27065	-0.0945	-0.14069	0.19708
2	38529975	38530082	-0.00211	-7e-05	-0.05032	-0.1328	-0.07074	0.67843	-0.23549
2	38564424	38564599	-0.15193	0.65709	-0.07709	-0.18348	-0.08537	-0.031	0.52567
2	38691364	38691468	-0.00644	-0.07318	-0.16057	-0.07201	-0.0125	-0.00493	-0.01361
2	38740316	38740429	-0.02106	-0.0087	-0.00477	-0.00076	-0.00243	-0.00119	-0.12803
2	38865656	38865759	-0.00391	-0.16029	-0.00049	-0.00134	-0.06611	-0.02442	-0.24233
2	39058834	39059095	0.54573	-0.72096	-0.42896	-0.17977	-0.01977	-0.85182	0.08479
2	39127862	39128032	-0.0004	-0.00083	-0.00019	-0.00087	0	-0.18568	0.4167
2	39270603	39270785	-0.075	-0.00486	-0.00298	-0.00434	-0.09438	0.06257	0.73206
2	39435895	39436029	-0.0025	-0.00044	-0.00013	-0.32715	-0.0007	-0.02194	-0.00694
2	39477361	39477478	-0.00367	-0.00042	-0.03574	-0.04363	-0.1803	-0.72925	-0.91151
2	40245499	40245639	-0.46081	-0.41347	-0.00876	-0.00017	0.6831	0.64418	0.92957
2	42007347	42007463	-0.00375	-0.0806	-0.01298	-0.01185	-0.00418	-0.033	-0.00783
2	42650848	42650961	-0.05813	-0.02806	-0.23326	-0.00297	-7e-05	-0.51912	-0.15378
2	43667530	43667725	-0.13604	-0.4231	-0.08384	-0.20215	-0.2471	-4e-05	-0.5221
2	44100548	44100777	-0.01415	-0.0091	-0.00538	0	-0.00367	-0.06331	-0.13305
2	44100782	44100918	-0.18977	-0.02182	-0.01415	-0.00048	-0.12827	-0.00942	-0.02578
2	44679055	44679165	-0.02753	-0.02155	-0.04384	-0.00023	-0.02356	-0.13409	-0.01857
2	45150480	45150749	-0.02148	-0.00783	-0.00546	-0.00098	-0.00052	1	-0.00514
2	45278760	45278883	0.96746	-0.16746	-0.02079	-0.05812	-0.02515	-0.6341	-0.21829
2	45387962	45388169	-0.70151	-0.30306	-0.10576	-0.00188	-0.01515	0.64445	-0.22607
2	45744178	45744292	-0.01063	-0.00395	-0.00208	-0.00026	-1e-05	-0.00081	-0.00139
2	45852889	45853021	-3e-05	-0.00624	-0.03082	-0.01482	-0.00043	-0.1903	-0.31588
2	47420107	47420243	-0.14313	-0.0023	-0.00275	-0.15911	-0.13486	-0.01176	-0.0044
2	47721987	47722197	-0.80475	-0.86795	-0.01145	-0.00079	-5e-05	-0.05952	-0.71278
2	47730057	47730179	-0.00045	-0.00842	-0.00186	-0.19587	-0.01396	-0.00069	-0.00287
2	47748294	47748632	-0.71658	-0.63078	-0.07897	-0.00101	-0.04363	-0.40815	-0.47487
2	48332606	48332751	-0.00183	-0.00024	0.99999	-0.06124	-0.00014	-0.013	-0.04647
2	48356118	48356270	-0.03068	-0.03778	0.99999	-0.00041	-0.00063	-0.00202	-4e-05
2	48422963	48423146	-0.00245	0.99999	-8e-05	-0.00172	0.99999	-0.33222	-0.03389
2	48461837	48461989	-0.00021	-0.01585	-0.005	-0.00131	-0.00025	-5e-05	-0.00103
2	48467058	48467172	-5e-05	-0.00803	-0.00024	-8e-05	-3e-05	-0.18309	-0.00824
2	48469041	48469202	-0.01047	-0.10896	-0.04445	-0.00309	-0.00413	-0.01762	-0.00026
2	48509187	48509289	-3e-05	-0.00205	-3e-05	-0.4648	-0.13882	-0.07185	-0.14782
2	48621653	48621777	-0.00262	-1e-05	0.99999	-0.00239	-0.00158	-0.02052	-0.01002
2	48633700	48633933	-0.01344	-0.02137	1	-0.00903	-5e-05	-0.11302	-0.00052
2	48634431	48634566	-0.0059	-0.0332	1	-0.00739	-0.08605	-0.0002	-0.29645
2	48634816	48635002	-0.06663	-0.31216	0.99999	-3e-05	-0.00488	-5e-05	-0.00019
2	48657055	48657158	-0.01336	-0.0003	-0.0004	-6e-05	-3e-05	-0.24213	-0.08602
2	48683412	48683627	-0.07463	-0.03073	-0.00288	-1e-05	0	-0.00623	-0.00064
2	48686666	48686842	-0.00037	-0.00616	0	1	0	0	-0.0094
2	48711390	48711543	-0.00016	0	-3e-05	0	0	0	0
2	48713849	48714055	-0.00885	-0.00687	-0.00014	-0.0199	-2e-05	-0.00673	-0.01768
2	48714568	48715501	0	0	0	0	0	-2e-05	-0.00639
2	48725719	48725821	-0.32784	-0.01514	-0.00015	-0.03123	-0.41243	-0.01334	-0.05277
2	48730653	48730916	0	0	0	0	0	-0.00043	-5e-05
2	48748503	48748603	-0.00035	-0.00034	-0.15534	0	0	-3e-05	-0.00057
2	48748605	48748829	-0.00737	-0.01312	-0.00219	0.98887	-0.00384	-0.00058	-0.09949
2	48749785	48749903	-0.04747	-0.00174	-0.00318	-0.00174	-0.00699	0.99999	-0.66566
2	48755381	48755544	0	0	0	0	0	0	-0.00041
2	48764827	48765193	-0.06345	-0.02408	-0.00053	-0.0528	-0.00066	-0.00025	-0.00258
2	48767269	48767636	0	0	0	-0.00851	-0.01273	-0.00021	-0.00621
2	48767656	48767942	-1e-05	-4e-05	0	0	-0.00023	-0.00768	-0.00375
2	48773129	48773655	0	0	0	0	0	-0.00138	-4e-05
2	48773660	48773760	-0.09665	-0.08809	-0.07734	-0.00162	-0.5072	-0.00783	-8e-05
2	48781403	48781606	-0.08011	-0.03441	-0.00012	-0.00023	-3e-05	-0.03755	-0.19624
2	48791763	48792005	0	-1e-05	-1e-05	-0.00025	-6e-05	-0.00021	-0.00096
2	48798704	48798906	-4e-05	0	-0.00017	-0.0049	-0.00172	-0.00708	-0.00253
2	48799085	48799303	-0.00356	-6e-05	-0.0021	-2e-05	-2e-05	-0.0004	-0.00011
2	48817683	48818301	0	0	-2e-05	-0.00042	-2e-05	-9e-05	-0.0178
2	48818581	48818760	-0.01013	-0.00065	-6e-05	-0.52893	-0.52567	-0.10816	-0.02002
2	48822201	48822312	-0.17695	-0.01688	-0.00156	-0.22291	0.2717	-0.12681	0.83489
2	48828657	48828954	-0.03395	-0.2241	-0.01395	-0.1984	-0.02577	-0.41241	-0.00086
2	48836436	48836539	-0.16604	-0.14764	-0.24638	-0.02167	-0.04024	-0.01593	-0.02582
2	48836544	48836681	-7e-05	-0.00101	0	-7e-05	0	-0.01267	-3e-05
2	48850957	48851148	-0.00518	-0.01422	-0.00043	-0.00169	-0.09771	-0.00022	-0.00057
2	48851559	48851733	-2e-05	-0.00278	-1e-05	-5e-05	-0.0001	-0.00041	-0.16612
2	48859031	48859213	-0.09068	-0.00308	-0.03409	-0.01264	-0.00693	-0.00023	-0.01612
2	48861407	48861544	1	0.99998	-2e-05	-1e-05	0	-0.01201	0
2	48861650	48861760	1	0.99999	-0.12793	-0.02485	-0.001	-0.00409	-0.00154
2	48869506	48869716	-0.00233	-0.00145	-0.00083	-2e-05	-0.00039	-0.0947	-0.81626
2	48881333	48881629	1	-0.00907	1	-0.07201	-0.01722	-0.22914	-0.28786
2	49007333	49007509	-0.00762	-0.09895	-4e-05	-0.00016	-1e-05	-0.00156	-0.86209
2	49019155	49019397	-0.0004	-0.00065	-0.00011	-0.01351	-1e-05	-0.17536	-0.14283
2	49023587	49023794	1	-0.3958	-0.02022	-0.00128	-0.01584	-0.97408	-0.00282
2	49510157	49510764	-9e-05	-1e-05	0	-0.00137	-0.00025	-0.0019	-0.00033
2	49515424	49515585	-0.22797	-0.07044	-0.11177	0.73805	-0.00381	-0.07731	-0.01758
2	49523185	49523391	-0.00099	-0.00303	-0.0005	-1e-05	-1e-05	-0.06434	-0.00027
2	49563860	49564342	-0.00022	0	0	-0.05192	-0.0018	-0.09105	0
2	49667148	49667294	-0.00378	-0.00037	-1e-05	-0.12848	-0.04524	-0.1968	-0.67453
2	49676676	49676983	-0.00017	-0.00036	-0.00044	-0.69095	-0.03551	-0.49717	-0.1664
2	49680158	49680314	-7e-05	-2e-05	-1e-05	0	-0.00024	-8e-05	-1e-05
2	49703735	49704122	-0.10515	-0.02415	-0.07615	-0.03023	-0.35573	-0.01857	-0.00554
2	49705288	49705433	-0.95643	0.84573	-0.08128	-0.00021	-0.0131	0.36936	0.64723
2	49706210	49706650	-0.00111	-0.03368	-0.00376	-0.45172	-0.00923	-0.74686	-0.03631
2	49723487	49724173	-0.00553	-0.00013	-1e-05	-0.00517	-1e-05	-0.0412	-0.00081
2	49761201	49761378	-0.87712	-0.40091	-0.00398	-0.02804	-0.00592	-0.67969	-0.7996
2	49776460	49776613	-0.00622	-2e-05	-0.00375	-2e-05	-0.00122	-0.0006	-0.82948
2	49776670	49776898	-0.48858	-0.1416	-0.06065	-0.01556	-0.00658	0.79172	0.31314
2	49781381	49781694	-0.00756	-4e-05	-0.00047	-0.00031	-0.00015	1	-1e-05
2	49790397	49790689	-0.13952	-0.03835	-0.02097	-0.17634	-0.00415	-0.42553	-0.39803
2	49790768	49790994	-0.19129	-0.02977	-0.05881	-0.34542	-0.00197	-0.52761	-0.27428
2	49814137	49814780	-0.21221	-0.39928	-0.25101	-0.11191	-0.07077	-0.0442	-0.27637
2	49818963	49819174	-0.00337	-0.04534	-0.00023	-0.1	-0.00326	-0.15635	-0.00201
2	49827025	49827436	-0.35271	-0.0548	-0.03039	0.55321	-0.75246	-0.01092	-0.46308
2	49829549	49829743	-0.05106	-0.04268	-0.00513	-0.01783	-0.00183	-0.06888	-0.41126
2	50247590	50247774	-0.06658	-0.12503	-0.04094	-0.33671	-0.3194	-0.06405	0.33695
2	50344545	50344700	-0.00225	-0.00069	-0.06868	-6e-05	-0.33052	-0.68623	-0.68261
2	50359365	50359467	-0.01049	-0.56168	-0.14715	-0.00409	-0.01156	-0.03846	-0.19587
2	50360996	50361280	-0.13805	-0.05994	-0.00029	-0.0434	-0.0006	-0.03898	-0.0587
2	50365005	50365128	-0.01758	-0.01935	-0.06511	-0.00466	-0.00091	-0.42053	-0.54076
2	50365247	50365353	-0.01708	-0.00762	-0.00172	-0.00018	-0.01708	-0.01814	0.41025
2	50405774	50405940	-0.01934	-0.01836	-0.03311	-0.05399	0	-0.0043	-0.42221
2	50425782	50425924	-0.03328	-0.10512	-0.20262	-0.02667	-0.17694	-0.14497	-0.29157
2	50430397	50430664	-0.01217	-0.0013	0	-3e-05	-0.00319	-0.00214	-0.02278
2	50431572	50431818	-0.09366	-0.02187	-0.0126	-0.44792	-0.03966	-0.44877	-0.24407
2	50449915	50450262	-0.22086	-0.15071	-2e-05	-9e-05	-0.88464	0.28391	-0.03625
2	50455406	50455715	-0.25391	-0.07678	-0.08609	-0.03164	-0.00908	0.58592	0.68068
2	50521079	50521275	-0.00267	-0.00089	-4e-05	-0.00071	-0.05091	-0.53158	-0.0422
2	50569519	50569648	-0.00062	-0.00053	-2e-05	-0.001	-0.00713	-0.09364	-0.9293
2	50575363	50575588	-0.00522	-0.00071	-0.00027	-4e-05	-0.00025	-0.00012	-0.00014
2	50670647	50670837	-0.45485	-0.0797	-0.12619	-0.00135	-0.09921	-0.38743	-0.00218
2	50699876	50700165	-0.00571	-9e-05	-0.00315	-0.76327	-0.17076	-0.36401	0.25354
2	50729064	50729465	-0.00239	-0.01794	-0.10711	-0.00677	-0.02198	-0.21102	-0.09867
2	50736084	50736325	-1e-05	-3e-05	-0.00019	-0.00017	-2e-05	-0.66302	-0.006
2	50977318	50977522	-0.2744	-0.09537	-0.02618	-0.3067	-0.80438	-0.11167	-0.01286
2	51169243	51169378	0.69412	-0.30512	-0.00105	-0.21572	-0.00368	-0.01021	0
2	53217501	53217740	-0.05878	-0.00599	-0.04197	-0.09998	-5e-05	-0.3282	-0.57444
2	55099596	55099864	-0.2005	-0.10573	0	-0.1005	-7e-05	-0.01324	-0.34007
2	56774642	56774790	-0.06062	-0.00281	0.92384	-0.07516	-0.00111	-0.22332	-0.16186
2	56816860	56816982	-0.22982	-0.01447	-0.36788	-0.23477	-0.18848	0.85677	-0.00105
2	57154286	57154405	-0.17575	-0.56529	-0.00019	-0.01407	-0.00971	-0.18289	-0.21791
2	58642166	58642452	-0.389	-0.08159	-0.00515	-0.05949	-0.00032	-0.17599	-0.00083
2	58670392	58670580	-0.18917	-0.09806	-0.00013	-0.0921	-0.03483	0.89452	0.7831
2	58993343	58993501	-0.71022	-0.30133	-0.22568	-0.14492	-0.0013	-0.83536	-0.22741
2	59907849	59907958	-0.00486	-0.18472	-0.14026	-0.15099	-0.00376	0.98105	-0.1051
2	60555038	60555186	-0.00149	-0.00052	-7e-05	-0.00094	0	-0.02315	-5e-05
2	60562915	60563352	-0.34473	-0.19551	-0.14996	-0.03857	-0.00086	-0.17196	-0.16619
2	60736260	60736553	-0.00293	-0.00202	-0.00014	-3e-05	-2e-05	-2e-05	-0.47655
2	61262452	61262603	-0.00026	-4e-05	-0.02009	-0.05296	-0.46108	-0.02626	-0.21112
2	61273052	61273160	-0.06051	-0.13282	-0.14893	-2e-05	-0.05375	-0.1736	-0.00568
2	61393851	61394014	-0.7324	0.94976	-0.02465	-0.02249	-0.08474	-0.21461	0.60015
2	62104586	62104726	-0.28985	-0.17517	-0.12166	-0.00104	0	-0.00196	-0.83094
2	63560196	63560300	-0.00012	-5e-05	0	-0.00021	-8e-05	-0.29979	-0.0013
2	63818842	63818973	-0.10607	-0.0274	-0.01826	-1e-05	-0.00642	-0.06113	-0.01456
2	64080648	64081040	0.10191	0.93102	-0.58324	-0.01629	-0.08733	-0.02081	-0.41174
2	64096506	64096688	-0.00264	0	-6e-05	-1e-05	-3e-05	-0.01071	-0.31455
2	64137292	64137808	-0.0638	-0.34209	-0.01215	-0.01302	-0.05406	-0.16391	0.76775
2	64148091	64148400	-0.01897	-0.07625	-0.19361	-0.48412	-0.54391	0.83746	-0.64859
2	64184286	64184398	-0.03343	-0.06112	-1e-05	0	-0.00019	-0.00289	-0.17749
2	64203969	64204132	-0.58229	-0.15385	-0.09037	-0.08837	-0.3982	-0.00957	-0.00029
2	64432266	64432535	-0.00259	-0.30145	-0.23031	-0.18353	-4e-05	-0.41399	-0.56534
2	64445720	64446093	-0.00663	-0.02038	-0.02137	-0.00559	-0.00132	-0.00412	-2e-05
2	64997080	64997263	-9e-05	-0.00323	-0.03227	-0.02239	-0.00618	-0.03858	-0.00165
2	65065072	65065207	-0.45138	-0.33771	-0.05208	-0.00051	-0.02013	-0.03211	-0.20612
2	65389460	65389678	-0.19103	-0.05264	-0.00055	-0.00014	-0.00094	-0.03915	-0.00181
2	65524003	65524104	-0.03485	-0.00228	-0.00036	-0.04401	-0.00057	-0.00035	-0.00048
2	65972669	65972806	-0.00551	-0.00383	-0.00019	-0.04973	-0.00035	-0.01613	-0.00561
2	65989087	65989224	-0.33616	-0.02084	-0.00516	-0.00022	-0.00058	-0.03936	-9e-05
2	66039534	66039656	-5e-05	-0.00019	-0.00029	-0.00011	-0.0011	-0.00487	-0.02087
2	66870142	66870293	-0.02295	-0.00409	-0.00533	-0.00672	-2e-05	-2e-05	-1e-05
2	66938690	66938801	-0.01284	-0.00022	-0.00055	-0.0022	-0.00194	-6e-05	-0.00195
2	67315620	67315763	-0.01565	-0.03207	-0.01027	-0.00847	-0.00394	-0.2459	-0.14485
2	67362192	67362422	-0.0039	-0.02927	-0.0032	-4e-05	-0.00033	-0.11343	-0.31375
2	67721469	67721749	-0.00148	-0.00203	-0.00016	-0.00353	-0.05452	-0.09294	-0.00349
2	68352290	68352408	-0.12586	-0.27905	-0.05931	-0.17758	-0.04957	-0.0004	-0.73624
2	68820937	68821087	-0.07031	-0.1674	-0.11334	-0.0015	-0.0103	-0.99144	-0.04023
2	68821091	68821193	-0.00204	-0.0004	-0.00066	-0.002	-1e-05	-0.06886	-0.02068
2	68841419	68841608	-0.00187	-0.01221	-2e-05	-0.00877	-1e-05	-0.10223	-0.12921
2	69617599	69617703	-0.02575	-0.06635	-0.17175	-0.02688	-2e-05	-0.0166	-0.86521
2	69740428	69740577	-0.10552	-0.02461	-0.01614	-0.04595	-0.35075	-0.02227	-0.00026
2	69740580	69740817	-0.09475	-0.00177	-0.00176	-0.12568	-0.07505	-0.81347	-0.31594
2	69747661	69747799	-0.02882	-0.02707	-0.03639	-0.0069	-3e-05	-0.00041	-0.00485
2	69803641	69803856	-0.05976	-0.00588	-0.00292	-0.00038	-3e-05	-0.00019	-2e-05
2	69878382	69878542	-0.47823	-0.0194	-0.00183	-0.00028	-0.00106	0.94021	-0.00278
2	70038222	70038471	-0.00229	-0.0006	-1e-05	-0.0003	-0.0015	-0.00153	-0.06713
2	72768698	72768839	-0.03356	-0.13385	-0.07127	-0.00459	-0.02425	-0.20231	-0.16902
2	73142393	73142523	-0.00576	-1e-05	-7e-05	-3e-05	0	0	-0.19807
2	75505030	75505169	-0.04485	-0.00439	-0.002	-0.72263	-0.47386	-0.51652	-0.38096
2	75616277	75616416	-0.03648	-0.19137	-0.05463	-0.01206	-3e-05	-0.18384	-0.00058
2	76185577	76185870	0.80893	-0.48843	-6e-05	-0.24601	-0.1899	0.38297	-0.73702
2	76242298	76242458	-0.49512	-0.48218	-0.38099	-0.27316	-0.00173	-0.54008	-0.00045
2	77156959	77157068	-0.81564	-0.00422	-0.00074	-0.00022	-0.19278	-0.18408	-0.56778
2	77298307	77298495	-9e-05	-0.00378	-0.00055	0	-0.00099	-0.00012	-0.28834
2	77435882	77435996	-0.59352	-0.0001	-0.11262	-0.22557	-0.10075	-0.27066	-0.36738
2	78168661	78168770	-0.01018	-0.17598	-0.00204	-0.00106	-0.08544	-0.48376	-0.80372
2	78177993	78178155	-4e-05	-0.00226	-0.00048	-0.00457	-0.00976	-0.03081	-0.15308
2	79520695	79520850	-0.03189	-0.00029	-0.02908	-0.06778	-0.19381	-9e-05	-0.09285
2	79533330	79533599	-0.27144	-0.08604	-0.05661	-0.01085	-0.0047	-0.13325	0.69804
2	79950732	79951011	-0.0333	-0.00632	0	-0.00467	0	-0.0318	-0.04659
2	79977429	79977679	0.9431	-0.10013	-0.0003	-0.00864	-0.01568	-0.35768	-2e-05
2	80358090	80358254	-0.01243	-0.0006	-0.00069	-1e-05	-0.05384	-0.0352	-0.14938
2	80579130	80579672	-0.06853	-0.02254	-0.00017	-0.33805	-0.05495	-0.03731	-0.86555
2	81266806	81266915	-0.00051	0	-6e-05	-0.027	-8e-05	-0.0012	-0.00828
2	81643049	81643236	-0.00059	-9e-05	-0.0027	-0.00868	-0.004	-0.66617	0.71202
2	82260315	82260455	0	-0.00079	-4e-05	-0.00193	0	-0.00043	-0.01846
2	83183841	83183957	-0.08069	-0.00068	-0.00755	-0.00056	-2e-05	-0.00639	-0.00027
2	83747328	83747522	-0.00759	-0.00639	-0.00026	1	-0.01132	-7e-05	-0.01028
2	85309308	85309462	-0.10341	-0.00274	-0.00588	-0.02155	0	-0.24644	-0.06977
2	85369788	85369944	-1e-05	-6e-05	-8e-05	-0.00282	0	-0.01514	-0.00126
2	86700568	86700908	-0.0408	-0.06112	-0.54379	-0.00084	-0.05415	-0.21504	-0.10614
2	86848038	86848256	-0.00135	-0.00374	-0.00014	-5e-05	-0.00071	-0.00403	-0.28939
2	86868757	86868910	0	-1e-05	0	-0.00068	0	-7e-05	-4e-05
2	87162955	87163163	-0.05962	0	-3e-05	-1e-05	-0.0027	-0.29324	-0.36626
2	87699524	87699629	-0.01104	-0.03162	-0.00106	-0.00417	-0.00356	-0.02068	-0.014
2	87742896	87743016	-0.01478	-0.00425	-0.00039	-1e-05	-4e-05	-0.00569	-0.13973
2	87924218	87924637	-0.08147	-0.0384	-5e-05	-0.00083	0	-0.47766	-0.0225
2	87924641	87924764	-0.00374	-0.1856	-0.0334	-0.15423	-6e-05	0.48069	0.50577
2	88592793	88592973	-0.16637	-0.01036	-0.00041	-0.00051	-0.09187	-0.06985	-0.02699
2	88953583	88953742	-1e-05	-0.0001	-5e-05	0	-1e-05	-0.00066	-6e-05
2	89746978	89747098	-0.6195	-0.06161	-0.08446	-0.69512	-0.12315	-0.05451	-0.04034
2	89830291	89830467	-0.17929	-0.03168	-0.00966	1	-0.01224	-0.01819	-0.33691
2	89894705	89895070	-0.04358	-0.66561	-0.37004	-0.0535	-0.06628	-0.07064	-0.09969
2	90930152	90930280	-0.02713	-0.06029	-0.00539	-0.01548	-0.198	-0.00279	-0.03113
2	91047941	91048116	1	1	0	-0.00034	-1e-05	-0.00057	-0.00328
2	91241566	91241693	0.85475	-0.65913	-0.08945	-0.03973	-1e-05	-0.98876	-0.15826
2	91262966	91263349	-0.07915	-0.00739	-0.00963	-0.00357	-2e-05	-0.10706	-0.00342
2	91388169	91388284	-0.07402	-0.03338	-0.12682	0.99999	-0.00568	-0.03661	-0.03702
2	91482994	91483100	-9e-05	0	-0.00016	-0.00063	-1e-05	0	-0.05691
2	91605694	91605812	-0.171	-0.00398	-0.0219	-0.11234	-0.10459	-0.01515	-0.0573
2	91790041	91790151	-0.41727	-0.11585	-0.23381	-0.01055	-0.00644	-0.75958	-0.07668
2	91811315	91811431	-0.34148	-0.05039	-0.17929	-0.03599	-0.09743	-0.13492	-0.29499
2	93035626	93035784	-0.48773	-0.20082	-0.00842	-0.01727	-2e-05	-0.3015	-0.03382
2	94782354	94782530	-0.43829	-0.09956	-0.01424	-0.03469	-0.12914	-0.01244	0.74321
2	95769829	95769935	-0.23537	-0.43411	-0.00591	-0.02002	-0.11385	0.66018	-0.05791
2	96023767	96023915	-0.29862	-0.56909	-0.00247	-0.00786	-0.01456	0.24835	0.23152
2	96591031	96591150	-0.25448	-0.01958	-0.02555	-0.00023	-0.00913	-0.00011	-0.29368
2	96767635	96767797	-0.05364	-0.14948	-0.2045	-0.21147	-0.09608	-0.80119	-0.47353
2	96901936	96902041	-0.00048	-0.00586	-0.05469	-0.00443	-0.00321	-0.01335	-0.07494
2	96945866	96946132	-0.64635	-0.00796	-1e-05	-0.0613	-0.00469	-0.02481	-0.59092
2	97670524	97670694	-0.26012	-0.08992	-0.15078	-0.00415	-0.01678	-0.37292	-0.02734
2	97705117	97705238	-0.06114	-0.61747	0.8861	-0.01174	-0.03393	-0.00623	-0.55333
2	97892825	97893070	-0.00954	-0.08572	-0.00081	-0.01926	-0.02277	-0.038	-0.24646
2	97978815	97978936	-0.51154	-0.02274	-0.01919	-0.00267	-0.03067	-0.00471	-0.0743
2	98079551	98079657	-0.00492	-0.09669	-0.0022	-0.05971	-0.00065	-0.24011	-0.37937
2	98189233	98189345	-0.00092	-2e-05	-8e-05	-0.0004	-8e-05	-0.01857	-0.71772
2	98245353	98245547	-0.00014	-3e-05	-0.00028	-6e-05	-0.00022	-0.0071	-0.05317
2	99009795	99009926	-0.15111	-0.03016	-0.02634	-0.20092	-0.00882	-0.02706	-0.29609
2	99197179	99197324	-0.1856	-0.13225	-0.01863	-0.01897	-0.10063	-0.36855	-0.19905
2	99328811	99329058	-0.00762	-0.00113	-0.01162	-0.00613	-0.10575	-0.01222	-0.22307
2	99666027	99666145	-0.01974	-0.15016	-0.02196	-0.02869	-0.11163	-0.55277	-0.65594
2	102560400	102560502	-0.01089	-0.13868	-0.02301	-0.24591	-0.00113	-0.02979	-0.02553
2	102996430	102996969	-0.09964	-0.00223	-0.00092	-0.00146	0	-0.02618	-0.39181
2	103770013	103770114	-0.00022	-7e-05	0	-2e-05	-0.00012	-0.03722	-0.0631
2	103827447	103827688	-0.00033	-0.00039	0	-0.00247	0	-0.07344	-0.37297
2	103942126	103942449	-0.92139	0.69462	-0.00199	-0.02222	-0.13548	0.76848	-0.4203
2	104006514	104006713	-0.06842	-0.01485	-0.31225	-0.00139	-0.02573	-0.66969	-0.15146
2	104012813	104013229	0.55268	-0.47801	-0.00304	-0.6102	-0.06456	-0.84761	-0.70165
2	104143517	104143634	-0.93076	-0.4502	-0.0911	-0.16428	-0.15589	-0.01164	-0.11494
2	104160776	104161048	-0.08482	-0.07198	-0.00012	-0.01227	-0.01896	-0.01089	-0.74332
2	105025691	105025808	-0.04377	-0.00144	-0.00065	-0.01558	0	-0.22944	-0.00231
2	105279161	105279383	-0.0081	-0.0001	0	-0.00557	-8e-05	-0.26157	0.59292
2	105334604	105334795	0.51883	-0.47211	-0.3134	-0.00455	-0.34084	-0.26694	0.58639
2	105477362	105477481	-0.0003	-0.00014	0	-0.00956	0	0	0
2	105497706	105497865	-0.2656	-0.15766	-0.0527	-0.20166	-4e-05	0.96479	-0.16871
2	106071657	106071779	-0.897	-0.32445	-0.01689	-0.07566	-0.0001	0.04871	-0.03448
2	106228713	106228819	-0.56291	-0.22329	-0.03977	-0.00864	-0.221	-0.13173	-0.0001
2	106897035	106897165	-0.00119	-0.18882	-0.01366	-0.00083	-2e-05	-4e-05	1
2	106897768	106897879	-0.06449	-0.4706	-0.927	-0.01713	-0.00041	-0.77053	-0.01086
2	107000531	107000648	-0.72148	-0.39104	-0.43471	-0.01502	-0.0071	-0.81554	-0.05782
2	107290680	107290860	-0.86781	-0.28218	-0.1627	-0.03191	-0.00572	0.85403	-0.3602
2	107370515	107370628	-0.04008	-0.03019	-0.00361	-0.0218	-0.0025	-0.13145	0.48145
2	107477521	107478046	-0.07462	-0.02499	-3e-05	-0.00095	-0.00078	-0.79393	-0.46763
2	107658897	107659022	0.57175	-0.6403	-0.09848	-0.83724	-0.21669	-0.10468	-0.00035
2	108485154	108485423	-1e-05	-0.00015	0	0	-0.00107	-0.00015	-0.00545
2	108595326	108595561	-0.05739	-0.02618	-0.00581	-0.00978	-0.06516	-0.15283	-0.1851
2	108636242	108636361	-0.01579	-0.09119	-0.00241	-0.00916	-0.03345	-0.08512	-0.4301
2	108686642	108686775	-0.00015	-0.00092	-1e-05	-0.00014	-3e-05	-1e-05	-0.08336
2	109909894	109910030	-0.55892	-0.67708	-0.00049	-0.03787	-0.01645	-0.21824	0.90138
2	110037771	110037944	-0.15004	-0.21305	-0.00025	-0.02076	-0.00334	0.3959	0.86293
2	110767240	110767465	-0.14568	-0.4496	-0.19078	-0.00971	-0.00681	-0.31387	-0.00366
2	112084919	112085057	-0.16672	-0.31664	-0.00065	-0.00088	-0.05894	-0.50731	0.27727
2	112367116	112367239	-0.00419	-0.00504	-0.00326	-0.06775	-0.00604	-0.09218	-4e-05
2	112496779	112497033	-0.00023	-0.03606	-0.03828	-0.27784	-0.01111	-0.01275	0.45688
2	112591471	112591690	-3e-05	-5e-05	-0.18201	-0.33514	-6e-05	-0.30072	-0.92055
2	112745247	112745441	-0.58219	-0.08032	-0.29624	-0.46173	-0.00716	0.32189	0.61508
2	112808505	112808622	-0.14785	-0.03097	-0.0033	-1e-05	-0.0008	-0.00169	-1e-05
2	112958592	112958922	-0.0225	-0.01958	-0.06305	0	0	-0.01231	-0.26898
2	113022853	113023063	-0.00021	0	-1e-05	-2e-05	-1e-05	-0.0085	-0.05816
2	114441327	114441580	-3e-05	-0.00119	-0.23911	-0.51349	-0.01825	-0.10448	-0.18862
2	114519412	114519531	-0.06398	-0.84147	-0.24502	-0.92753	-0.01136	-0.07447	-0.44611
2	114683137	114683296	-0.15873	-0.02345	-0.18584	-0.0428	-0.02759	-0.27019	-0.48512
2	115155944	115156053	-0.31162	-0.03677	-0.16672	-0.0054	-0.00046	-0.44182	-0.04533
2	115162620	115162756	-0.05488	-0.08212	-0.04751	-0.02277	-0.00616	-0.35668	-0.09476
2	115162778	115162956	-0.33394	-0.31569	-0.00826	-0.08587	-0.00652	-0.06235	-0.12568
2	115827161	115827390	-0.00596	-0.02127	-0.20446	-0.00057	-0.01952	-0.01164	-0.0045
2	116748197	116748308	-0.07491	-0.63595	-0.0492	-0.09676	-0.02104	-0.00053	-0.43535
2	117358882	117359015	-0.60462	-0.69377	-0.56787	-0.00152	-0.02262	-0.85809	-0.14423
2	117390228	117390415	-0.0001	-8e-05	-0.00038	-0.13819	-0.29821	-0.09357	-0.19745
2	117402327	117402644	-0.00512	-0.00577	-0.00164	-0.03418	-0.01219	-0.00768	-0.00105
2	117529350	117529515	-0.23114	-0.37994	-0.00059	-0.52442	-0.09098	-0.09688	-0.34807
2	117538710	117538874	-0.00134	-0.09279	-0.1955	-0.03071	-0.64815	0.63906	-0.16469
2	117690057	117690441	0.56516	-0.13276	-0.00539	-0.44001	-0.00074	-0.12149	0.2842
2	117921983	117922098	-0.07593	-0.00702	-0.01673	-3e-05	-4e-05	-0.0807	-0.01978
2	118111314	118111507	-0.50811	-0.04207	-0.07292	-0.04985	-0.08511	-0.13081	-0.0073
2	118684402	118684584	-0.04428	-0.10261	-0.02065	-0.17259	-0.01231	-0.88883	0.82167
2	119153259	119153425	0	0	0	0	0	-0.00012	-0.00019
2	119204251	119204476	-2e-05	-0.00299	-0.00038	-0.02427	-0.00533	-0.01613	-0.15159
2	119543399	119543529	-0.01258	-0.13389	-0.00472	-0.01108	-0.00106	-0.53269	-0.14765
2	119543531	119543645	-0.00041	-6e-05	-0.00021	-0.00017	-0.00014	-0.20757	-0.31416
2	119615016	119615212	0	-0.00032	0	-0.00103	-1e-05	-0.16233	-0.00165
2	119672726	119672945	-0.02281	-0.01833	-0.00208	-0.00634	-0.00408	-0.34994	0.35412
2	119684945	119685112	-0.0004	-2e-05	-0.01479	-0.0039	-0.0003	-0.6913	-0.06891
2	119707121	119707236	-0.01958	-0.48177	-0.03979	-0.01742	-0.46118	-0.87292	0.61343
2	119881330	119881453	-0.00719	-0.13704	-0.31113	-0.05103	-0.00693	-0.0227	-0.14705
2	120540952	120541122	-0.00115	-0.00085	-6e-05	-0.01881	-0.0069	-0.95236	-0.7961
2	120570976	120571086	-0.20393	-0.01157	-0.0002	-0.02029	-0.0186	-0.04923	-0.02185
2	121157000	121157100	-0.00936	-0.11317	-0.06003	-0.00369	-0.06127	-0.79646	-0.17775
2	121184106	121184228	-0.37704	-0.06134	-0.04493	-0.00051	-3e-05	-0.34008	-0.11052
2	121218154	121218300	-6e-05	-0.00146	-0.00455	-0.03277	-0.02422	-0.04922	0.89355
2	121496506	121496663	-0.00052	-0.13654	-0.00104	-0.00142	-0.92799	-0.56499	-0.70066
2	122170233	122170533	-0.27514	-0.26243	-0.02221	-0.00788	-0.14067	-0.10384	0.66369
2	122281867	122281974	-0.00182	-0.25939	-0.00014	-0.01962	-0.06389	-0.94974	0.94081
2	122768213	122768337	-3e-05	-2e-05	-0.0001	-0.00845	-0.01507	-0.8831	-0.00101
2	122837992	122838094	-0.08671	-0.00726	-0.01033	-0.00684	-0.14817	-0.17853	-0.2575
2	122939225	122939534	-0.00624	-0.00257	-0.00037	-2e-05	-0.00113	-0.00998	-0.65536
2	122951701	122951924	-0.03335	-0.00552	-0.12418	-0.00839	-0.05606	-0.2625	-0.35464
2	123627839	123628097	-0.01003	-0.0588	-0.08213	-0.00726	-0.00203	-0.10522	-0.51129
2	124086482	124086609	-0.00399	0	-0.00023	-9e-05	-7e-05	-0.0003	-0.01431
2	124103225	124103396	-0.01572	0	0	-0.00208	-0.10094	-0.00962	-0.16489
2	124380316	124380577	-0.0072	-0.00175	0	-0.09305	-0.00434	-0.00933	-0.01081
2	124556683	124556796	-0.00117	-0.04301	-0.00075	-0.00032	-0.0001	-0.0007	-0.00752
2	124677439	124677790	-0.0098	-0.0325	-0.06219	0.71397	-0.01415	-0.08546	-0.00881
2	125293011	125293151	-0.04386	-0.29698	-0.01085	-5e-05	-0.01634	-0.0018	-0.86317
2	125497715	125497976	-0.0003	0	0	-0.0001	-0.00203	-0.11803	-0.40644
2	125671502	125671659	-0.094	-0.06475	-0.00389	-0.01611	-0.00039	-0.11714	-0.17746
2	125780799	125781336	0.50471	-0.61034	-7e-05	-0.00638	-0.80881	-0.11365	0.56989
2	125805059	125805260	-0.04841	-0.15324	-0.16864	-0.00287	-0.00403	-0.11106	-0.01544
2	125997692	125997866	-0.00807	-0.00325	-0.09036	-0.02541	-0.00054	-0.01579	-0.45379
2	126125573	126126060	-0.02314	-0.01783	-0.0008	-0.25142	-0.79922	0.85548	0.78786
2	126175213	126175487	-0.0003	-0.00016	-6e-05	-0.00015	-0.00133	-0.01834	-0.86841
2	126235539	126235736	-0.57143	-0.14529	-0.00987	-0.00024	-0.00023	-0.0354	-0.68015
2	126266751	126266947	-0.29943	-0.41936	-0.03826	-0.02817	-0.03091	-0.61668	-0.25074
2	126654015	126654156	-0.06821	-0.07114	0.99999	-0.0006	-0.00445	-0.10894	0.46189
2	127065870	127066184	-0.26862	0.94278	-0.53617	-0.52768	-0.02846	-0.19325	-0.02815
2	127072784	127072925	-0.18597	-0.01881	-0.01263	-0.00016	-0.0078	-0.09329	-0.17186
2	127074008	127074460	-0.04139	-0.34603	-0.0022	-0.01604	-0.0083	-0.80442	0
2	127095483	127095746	-0.06195	-0.03063	-0.00032	-0.07841	-0.00101	-0.00751	-0.20454
2	127104677	127104804	-0.95526	-0.46557	-0.13134	-0.02706	-0.00016	-0.00359	-0.03803
2	127106072	127106186	-0.01342	-0.00353	-0.00473	-1e-05	-0.01646	-0.0446	-6e-05
2	127381898	127382003	0.88443	0.74028	-0.38913	-0.19704	-0.1115	-7e-05	-0.68422
2	127388957	127389296	-0.00108	-0.08307	-1e-05	-0.00248	0	-0.00335	-0.01248
2	127813988	127814109	-0.14099	-0.14982	-0.00126	-0.02677	-0.02453	-0.46225	-0.17958
2	127826792	127826975	-0.00214	-0.06153	-0.36238	-0.08189	-0.01198	-0.01626	-0.09319
2	128251883	128252088	-0.04777	-0.00498	-0.02191	-0.04272	0	0	-0.00072
2	128252143	128252418	-0.01478	-0.21103	-0.00198	-0.18881	-0.01836	-0.48931	-0.0379
2	128311352	128311473	-0.29671	-0.0905	-0.00408	-0.0014	-1e-05	-0.19306	-0.05787
2	128448714	128449082	-0.036	-0.00794	-0.00178	-0.02398	-0.00017	-0.00379	-0.05297
2	128844295	128844541	-0.05471	-0.02546	-0.00753	-0.00131	-0.00593	-0.00317	-0.00109
2	128844807	128844949	-0.00609	-0.04895	-0.01297	-0.0357	-0.44909	-0.01773	-0.10602
2	128878929	128879207	-0.09596	-0.14759	-0.01272	-0.01872	-0.0001	-0.06085	-0.02564
2	128920116	128920245	-0.03988	-0.10403	-0.01033	-0.00515	-2e-05	-0.04445	-0.09194
2	129082146	129082260	-0.01153	-0.00632	-0.00797	-0.0013	-0.00042	-0.04207	-0.21463
2	129273667	129274143	-0.00072	-0.0001	-0.06267	0	-7e-05	-0.04106	-0.55069
2	129758692	129759025	-0.00108	-0.00069	-0.00029	-0.00325	-0.28328	0.63979	-0.13883
2	130066154	130066298	-0.05717	-0.00591	-0.01756	-0.00133	0	-0.00371	-0.04741
2	130093908	130094076	-0.00014	-0.00065	-0.00523	-0.00087	-0.00062	-0.01785	0.58314
2	130163583	130163795	-0.00484	-0.00023	-0.00227	-5e-05	-0.0128	-0.00162	-0.02797
2	130657615	130657866	-0.00082	-0.00038	-0.03362	-0.22696	-0.00036	-0.16293	-0.08133
2	130718323	130718507	-1e-05	-1e-05	-0.00108	-0.00058	0	-0.05078	-0.04022
2	130827645	130827996	-0.00861	-0.02249	-0.028	-0.17094	-0.12209	0.79757	-0.16116
2	130875196	130875382	-0.02569	-0.10625	-0.02092	-0.00109	-0.01291	-0.21126	-0.07372
2	130987205	130987687	-0.02934	-0.00506	0	-0.18714	-1e-05	-0.00407	-0.60372
2	131042626	131042791	-0.00946	-0.02401	-0.94188	-0.02759	-0.00023	0.71123	-0.00019
2	131064374	131064519	-0.59007	-0.25576	-0.21691	-0.63663	-0.01341	0.22255	-0.15346
2	131103808	131103948	-0.02542	-0.00511	-0.01423	-0.00096	-0.00028	-0.39596	-0.00344
2	131130553	131130658	-0.14658	-0.02497	-0.00129	-0.0319	-0.01889	-0.04837	-0.93598
2	131156643	131157003	-0.00088	-0.00389	-0.00804	-0.0032	-7e-05	-0.00128	-0.06285
2	131507541	131507653	-0.00133	-0.00344	-0.08303	-0.00013	-7e-05	-0.00863	-0.0011
2	131752729	131752856	-0.20642	-0.083	-4e-05	0	-0.00695	-0.28186	0.51182
2	131860421	131860610	-0.20673	-0.5798	-0.00954	-0.08787	-0.00102	-0.15969	-0.02017
2	132032385	132032604	-0.00036	-0.0001	-4e-05	-0.00064	0	-0.0036	-0.0247
2	132167475	132167646	-0.8975	-0.43292	-0.1269	-0.00181	-0.00043	-0.02282	-0.32287
2	132187808	132187971	-0.00042	-5e-05	-0.00172	-0.00024	-0.00015	-0.00668	-0.62807
2	132408143	132408713	-0.69602	-0.57898	-0.84954	-0.3668	-0.08716	-0.25464	-0.02785
2	134851135	134851505	-0.1139	-0.02263	-0.03029	0.66671	-0.05704	0.85372	0.80701
2	134905793	134905957	-0.00365	-0.001	-7e-05	-0.00091	0	-0.1245	-0.2981
2	134945431	134945538	-0.00531	-0.0002	-0.01952	-0.26753	-0.0035	-0.32173	-0.38914
2	134945552	134945691	-0.00031	-9e-05	-0.00794	-0.00798	-0.00014	-0.19067	-0.03859
2	134997450	134997717	-0.17831	-0.09844	-0.00012	-0.05238	-0.00145	-0.00173	-0.00865
2	135014165	135014413	-0.00113	-0.0017	-0.00013	-0.00304	-0.19111	-0.12312	-0.00877
2	135016365	135016680	-0.0063	-0.00019	0	-4e-05	-1e-05	-0.437	-0.47057
2	135083866	135084664	-0.00453	0	-1e-05	-0.30015	-5e-05	-0.1869	-0.08788
2	135098140	135098405	-0.05417	-0.38714	-0.01533	-0.29021	-0.00024	-0.09386	-0.12295
2	135164594	135164824	-0.00275	-0.00527	0	-0.00031	0	-0.01551	-0.04258
2	135349327	135349496	-0.71583	-0.41192	-0.19482	-0.01325	-0.00459	-0.28938	0.9977
2	135354967	135355069	-0.00412	-0.03676	-0.00265	-0.06667	-0.08116	-0.08287	-0.00163
2	135435760	135435956	-0.00106	-0.00579	0	-0.00133	-0.00556	-0.0036	-0.71261
2	135625951	135626097	-0.03133	-0.00287	-0.00325	-0.00946	-0.00023	-0.02833	-0.00706
2	135845886	135846015	-0.34258	-0.4118	-0.06802	-0.18585	-0.09896	-0.00271	-0.9277
2	135918022	135918206	-0.01694	-0.00101	-4e-05	-0.00283	-0.00052	-0.15608	-0.00238
2	136072539	136072856	-1e-05	-1e-05	-0.00399	-3e-05	-6e-05	-0.00108	-0.01706
2	136170506	136170779	-0.49601	-0.20097	-0.00086	-0.17052	-0.03142	-0.28466	-0.00707
2	136220727	136220827	-0.00033	-0.00488	-0.01715	-0.00174	-0.00027	-0.00018	-0.0001
2	136244357	136244567	-0.00014	-0.0157	-0.0003	-0.00247	-6e-05	-0.06905	-0.05044
2	136245699	136245804	-0.34965	-0.04828	-0.0015	-0.00663	-0.4178	-0.43955	-0.026
2	136463385	136463485	-0.35804	-0.04419	-0.07961	-0.06508	-0.3022	-0.92689	-0.13749
2	136595640	136595763	-0.00102	-0.00695	-0.00372	-0.09475	-0.06366	-0.00021	-0.82856
2	136792348	136792509	-0.01626	-0.0069	-0.00721	-0.00583	-0.00384	-0.015	-0.03955
2	137141762	137141877	-0.05639	-0.08581	-0.12616	-0.07583	-0.00329	-0.03706	-0.00227
2	137639280	137639404	-0.00578	-0.0495	-0.08314	-0.11986	-0.0081	-0.37954	-0.41259
2	137762476	137762712	-0.09729	-0.39759	0.99999	-0.0008	-0.00533	-0.00359	-0.00203
2	137861972	137862116	-0.35886	-0.11795	-0.30762	-0.12003	-0.20466	0.68685	-0.0658
2	137968650	137968783	-0.03351	-0.0163	-0.00666	-3e-05	-0.10847	-0.00016	-0.19874
2	138610086	138610193	-0.14653	-0.00637	-4e-05	-0.00017	-0.00511	-0.00629	-0.75815
2	138961848	138961967	-0.02024	-0.00851	-0.00048	-0.00248	-0.00669	-0.00103	-0.00391
2	139153179	139153334	-0.35421	-0.03556	-0.01938	-0.00054	-0.00028	-0.71316	-0.4231
2	139588144	139588333	-0.07485	-0.0725	-0.00719	-0.01084	-0.15697	-0.70748	-0.04227
2	140248931	140249132	-0.05137	-0.02044	-0.01915	-0.63483	-0.01383	-0.14954	-0.82975
2	140547514	140547716	-0.03272	-0.07981	-0.00173	-0.00478	-0.0028	-0.01774	-0.10106
2	140642479	140642608	-0.05863	-0.03143	-0.00886	-0.06356	-0.00172	-0.03342	-0.0009
2	140839586	140839830	-0.0288	-0.00522	-0.00721	-0.09653	0	-0.00133	-0.02461
2	141522754	141522864	-0.00095	-0.00044	-0.0003	-0.00595	-0.00062	-0.00066	-0.01649
2	142244243	142244399	-3e-05	-3e-05	0	-0.04371	-0.00166	-0.10505	-0.07329
2	142757674	142757834	-0.00325	-0.02172	-0.03626	-0.01741	-0.00061	-0.00243	-0.37167
2	142787154	142787368	-0.07222	-0.10613	-0.48382	-0.00052	-0.0015	-0.99228	-0.81669
2	142912130	142912409	-0.01835	-0.03682	-0.01165	-0.01463	-0.03164	-0.00041	-0.00926
2	142965262	142965424	-0.00608	-9e-05	-0.00416	-0.07764	-0.00111	-0.06062	-0.21158
2	143022282	143022584	-0.04443	-0.02377	-0.00159	-0.00071	-0.00148	-0.01642	-0.28981
2	143061618	143061738	-0.0124	-6e-05	-0.00239	-0.08752	-0.45909	-0.6691	-0.06692
2	143240164	143240415	0	-1e-05	-0.00121	-0.00139	0	-0.16712	-0.76348
2	143297217	143297472	-0.01535	-0.01033	-2e-05	-0.14705	-0.00029	-0.32705	-0.19778
2	143586302	143586445	-0.0025	-0.00027	-0.1782	-0.12178	-0.00018	-0.00477	-0.07987
2	144991640	144991756	-0.41603	-0.00182	-0.00135	-0.2681	-0.34698	-0.03894	-0.74186
2	145109207	145109539	-0.79471	-0.15171	-0.26514	-0.00919	-0.03989	-0.01337	-0.09359
2	145195429	145195562	-0.00354	-0.00051	-0.00328	0.99894	-0.81772	-0.22655	-0.3241
2	145266010	145266206	-0.2303	-0.94253	-0.04987	-0.00933	-0.00869	-0.04004	-0.01521
2	145460183	145460308	-0.25538	-0.16741	-0.13069	-0.00428	-0.06247	-0.07506	-0.0556
2	146694484	146694603	-0.32732	-0.01003	-7e-05	-0.17162	-0.02595	-0.04502	-0.00213
2	147298571	147298671	-0.01987	-0.02589	-0.00051	-0.00511	-0.01697	-0.22132	-0.06074
2	148112026	148112164	0	0	-4e-05	-0.03194	-0.02897	-0.00577	-0.04146
2	148638833	148638972	-0.00035	-0.00047	0	-8e-05	-5e-05	-0.00145	0
3	819907	820110	-0.00489	-0.25047	-5e-05	-0.47312	-0.00584	-0.04003	-0.00067
3	827253	827368	-0.05931	-0.03607	-0.02054	0.99999	-0.04196	0	-0.06821
3	847460	847572	-0.00531	-0.01586	-0.00039	-0.09905	-0.00013	-0.00647	-0.07263
3	913868	913974	-0.01722	-0.18195	-0.00123	-0.00517	-0.00836	-0.00592	-0.00888
3	1027137	1027353	-0.00637	-0.00969	-0.00159	-0.0009	-0.01088	-0.00344	-0.09056
3	1288228	1288362	-0.00011	-0.00166	-0.00091	-0.00141	-0.00379	-0.03652	-0.02722
3	1440146	1440542	-0.01846	-0.00067	-0.00292	0	-0.00053	-0.0143	-0.03882
3	1475087	1475193	-0.01211	-0.01988	-0.10926	-0.00358	0	-0.53876	-0.34133
3	1579387	1579598	-0.11781	-0.03362	-0.02019	-0.02175	0	-0.51007	-0.00211
3	4587536	4587669	-0.00284	-0.00281	0	-0.00542	0	-0.00354	0.40994
3	4951795	4951998	-0.00137	-0.03061	-4e-05	-0.31008	-0.73931	-0.88849	-0.38121
3	4996167	4996269	-0.00077	-7e-05	-4e-05	-6e-05	0	-0.90852	-0.00084
3	5152201	5152301	-0.02788	-0.34526	-0.09778	-0.31024	-0.0013	-0.0003	-0.9508
3	5205849	5205996	-0.08127	-0.0079	0.99999	-0.00012	-0.08111	-0.1792	-0.48752
3	5254069	5254304	-0.20837	-0.01141	-0.06836	-0.01285	-0.01457	-0.0196	0.21962
3	5291784	5292015	0.86213	-0.19247	-0.00867	-3e-05	-0.01357	-0.0017	-0.17104
3	5306999	5307216	-0.00039	-0.00034	-2e-05	-0.01287	-0.00748	-0.02569	-0.07724
3	5322953	5323197	-0.00707	-0.01727	-0.00176	-0.01299	-0.00552	-0.45	-0.03333
3	5325986	5326143	-0.0447	-0.10457	-0.00074	-0.00392	-0.03807	-0.01043	-0.28244
3	5346122	5346232	0	-0.00035	-0.00141	-0.00204	0	-0.00103	-0.00308
3	5364967	5365157	0	0	-0.00015	-0.01935	-0.00236	-0.00901	-0.36695
3	5385475	5385865	-0.00812	-0.00137	-0.00027	0	-0.0021	-0.00383	-0.20304
3	5392633	5392762	-0.00018	-0.00935	-0.00225	-3e-05	-0.00018	-0.01241	-0.01568
3	5454703	5454881	0.43565	-0.09136	-0.01171	-0.0956	-0.00238	-0.0174	-0.13618
3	5494882	5495069	-0.10657	-0.1253	-0.4609	-0.21864	-0.00522	-0.76675	-0.00131
3	5501076	5501179	0	-0.00092	-0.00473	-9e-05	-1e-05	-0.06732	-0.60635
3	5553559	5553703	-0.00064	-0.17387	-0.00188	-0.06863	-0.02526	-0.03681	-0.01608
3	5594475	5594648	-0.20183	-0.01283	-0.00676	-0.00915	-0.01465	-0.00137	-0.10333
3	5833647	5833906	-0.00143	-0.00036	-0.00396	0	-0.00217	-0.15241	-0.02536
3	5875160	5875291	-0.00025	-0.00015	-0.01923	-0.00189	-0.00022	-0.00867	-0.01737
3	5893326	5893590	-0.03729	-0.04896	-0.02454	0	-0.1818	-0.01042	-0.00302
3	6195867	6196069	-0.02952	-0.01272	-0.01221	-0.00335	-0.0001	-0.00015	-0.0049
3	6273307	6273450	-4e-05	-0.00177	-0.01464	-0.4667	0.17907	-0.61658	-0.12455
3	6944467	6944615	-0.14276	-0.00941	-0.01095	-0.00144	-0.00618	-0.18485	-0.00679
3	7305129	7305372	-0.93137	-0.07955	-0.00471	-0.11897	-0.20645	-0.37357	0.09205
3	10267096	10267221	-0.0162	-0.03628	-0.00957	0	0	-0.02797	-3e-05
3	10502479	10502584	-0.00601	-0.00025	-0.00165	-5e-05	0	-0.00102	-0.00243
3	10525034	10525167	-0.11289	-0.79586	-0.0698	-0.02679	-0.17585	-0.22091	-0.11638
3	10621153	10621297	-0.00281	-0.00769	-0.00424	-1e-05	-0.00048	-0.0017	-0.00048
3	10728380	10728509	-0.00258	-5e-05	1	-0.02704	-0.00038	-0.03122	-0.23317
3	10729565	10729895	-0.01675	-0.0018	-0.01557	-0.01319	-0.09247	-0.05599	-0.33505
3	10762831	10762954	-0.30282	-0.36472	-0.02214	-0.02326	-0.09215	-0.91453	-0.77929
3	10799299	10799546	-0.05881	-0.779	0.45928	-0.01206	-0.08396	0.74413	0.2444
3	10918294	10918518	-0.0124	-0.02179	-1e-05	-1e-05	-0.00021	-0.006	-0.09314
3	10925564	10925744	-0.41637	-0.10686	-0.05404	-0.11874	-0.56766	0.74697	-0.34086
3	10933053	10933194	-0.00109	-0.00035	-0.18875	-0.09379	-0.47205	0.89286	-0.37563
3	10977084	10977381	-0.07801	-0.00577	-0.01113	0	-1e-05	-0.01385	-0.22841
3	10994771	10995056	-0.08678	-0.03285	-0.02177	-0.02478	-0.00165	-0.97994	-0.14617
3	11004966	11005455	-0.01817	-0.34132	-0.95887	-0.0009	-0.54664	-0.54825	0.67649
3	11013007	11013111	-0.00836	-0.00033	-0.12228	0	-0.01263	-0.04197	-0.00901
3	11026167	11026520	-0.0091	-0.09679	-0.02375	-0.00066	-0.00835	-0.14333	0.66662
3	11039580	11039801	-0.52449	-0.14744	-0.02296	-0.16318	-0.00851	-0.26809	-0.00763
3	11053125	11053607	-0.03438	-0.35548	-0.00042	-0.00025	-0.07007	-0.11624	-0.00818
3	11060495	11060734	-0.00325	-0.00265	-0.00301	-0.23184	-0.06096	-0.43069	-0.43748
3	11060872	11061027	-0.5843	-0.00053	-0.93037	-0.003	-0.73021	0.49241	-0.19846
3	11083420	11083620	-0.08013	-0.00031	-0.19787	-0.00011	-0.13085	-0.0069	-0.34759
3	11103520	11103680	-0.01359	-0.00693	-0.6954	-0.00681	-0.0015	0.4195	-0.06257
3	11109288	11109456	-0.26156	-0.1554	-0.05125	-0.53752	-0.00012	-0.05584	-0.06066
3	11119461	11119597	-0.27288	-0.00975	-0.0614	-0.0089	-0.27366	-0.11418	-0.01192
3	11152824	11153027	-4e-05	-1e-05	-0.0057	-0.00622	-0.18417	-0.00977	-0.2189
3	11161677	11162117	-0.26677	-0.0021	-0.00093	-0.0005	-0.08748	-0.02511	0.54295
3	11175688	11176286	-0.00011	-0.00083	-0.00317	-0.00031	0	-0.00087	-0.03133
3	11178075	11178276	-0.04993	-0.00483	-0.01299	-0.00068	-0.06029	-0.20501	-0.49574
3	11181321	11181541	0	0	0	0	-0.00022	-0.0001	-0.16551
3	11201512	11201741	-0.00162	-0.01848	-0.01413	-0.00351	-0.00096	-0.09026	-0.02258
3	11209339	11209608	-0.0003	-0.00345	-0.00027	-6e-05	-0.00092	-0.00125	-0.00011
3	11577394	11577568	-0.00848	-0.00053	-0.02334	-9e-05	-0.07338	-0.00255	-0.00551
3	11585268	11585466	-0.00264	-0.06768	-0.02542	-0.00012	-0.2425	-0.18417	-0.43147
3	11586559	11586715	-0.03584	-0.00665	-0.00016	-0.02218	-0.00786	-0.35042	-0.20503
3	11593055	11593276	-0.00024	-0.00554	-0.00532	-0.00018	-0.33026	-0.62	0.44877
3	12646499	12646659	-0.19218	-0.39032	-0.00226	-0.02918	-0.08478	0.08716	0.04391
3	12986864	12986997	-5e-05	-9e-05	-9e-05	-0.00266	-3e-05	-0.12459	-0.26464
3	13222673	13222784	1	-0.68954	-6e-05	-0.0009	-0.0085	-0.00027	-0.04664
3	14862452	14862564	-0.02165	-0.01179	-0.00103	-0.0003	-0.00271	-0.02326	0.99999
3	16674366	16674480	-0.01415	-0.09203	-0.02616	-0.14087	-0.00104	-0.97435	-0.54068
3	17080200	17080370	-0.01743	-0.05683	-0.15976	-0.60125	-0.01665	-0.00633	-6e-05
3	17553386	17553572	-0.00455	-0.00026	-0.08517	-0.00213	-0.00087	-0.01925	-0.26382
3	18504959	18505124	-0.01126	-0.00168	-0.00013	-0.00376	-0.00106	-5e-05	-0.21006
3	18784853	18785126	-0.01612	-0.19348	-0.00854	-0.00386	-0.00335	0.17709	0.12289
3	19100457	19100558	-2e-05	-0.00195	-0.00032	-0.10848	-0.00107	-0.00896	-0.2175
3	19744496	19744731	-0.04029	-0.47673	-0.14909	-0.8088	-0.34913	0.84001	0.33256
3	19901986	19902142	-0.43813	-0.29494	-0.05412	-0.02124	-0.23655	-0.25595	-0.6136
3	19945655	19945841	-0.00141	-0.00039	-9e-05	-0.00641	-0.02114	-0.02211	-0.00182
3	20166641	20166946	-0.05796	-0.25516	-0.00228	-0.2567	-0.20667	0.55094	-0.30359
3	20273610	20273737	-0.00015	-0.1809	-0.00234	-0.00607	-0.17312	-0.15913	-0.08429
3	20315340	20315488	-0.20388	-0.32784	-0.14254	-0.08403	-0.00072	-0.45222	0.56526
3	20321520	20321676	-0.00777	-0.02711	-0.04512	-0.00033	-0.00673	-0.07467	-0.02413
3	20652852	20653150	-0.01155	-0.06178	-0.00442	-8e-05	-1e-05	-0.0355	-0.00639
3	20665798	20666071	-0.00019	-0.00076	0	-0.0001	-2e-05	-0.01259	-0.0429
3	20700701	20700805	-0.00044	-0.00014	-0.00031	-2e-05	-0.00392	-0.00011	-0.01593
3	20867579	20867903	-0.00704	-0.00549	0	-0.00621	-0.00232	-0.06748	-0.00275
3	21217285	21217512	-0.08085	-0.37545	-0.22267	-0.18142	-0.01062	-0.42841	-0.05299
3	21246840	21246962	-0.33964	-0.37393	-0.0825	0	-0.01576	-0.3393	-0.74382
3	21292338	21292499	-0.12072	-0.02997	-0.00033	-0.41533	-0.00101	0.84989	-0.4191
3	21545880	21546638	-0.29618	-0.24378	-0.08459	-0.0173	-0.04761	-0.05545	-0.00144
3	21564329	21564622	-0.02919	-0.54958	-0.02516	-0.8059	-0.08852	-0.27439	-0.24066
3	21569963	21570275	-3e-05	-1e-05	0	-5e-05	0	-0.00019	-8e-05
3	21685985	21686145	-0.00233	-0.0093	-0.55187	-0.67416	-0.00116	-0.65766	-0.00513
3	21746501	21746655	-0.02319	-0.54336	-0.00566	-0.32094	0.9428	-0.17182	-0.09668
3	22367369	22367541	-0.14879	-0.4179	-0.0044	-0.00046	-0.00053	-0.02729	-0.45342
3	23195774	23195901	-0.01969	-0.00224	-0.73843	-0.00444	-0.00033	-0.36848	-0.73116
3	23207034	23207163	-0.01969	-0.00224	-0.73843	-0.00444	-0.00033	-0.36848	-0.73116
3	23392427	23392549	-0.27878	-0.27529	-0.10147	-0.02518	-0.02214	-0.00671	-0.00051
3	23484737	23484917	0.70374	0.69243	-0.41463	-0.06986	-0.22799	0.27127	-0.04736
3	23962501	23962661	-0.00192	-0.0018	0	-1e-05	-2e-05	-4e-05	-1e-05
3	23963487	23963671	0	0	-0.00076	-0.00037	-0.00016	-0.00919	-0.02812
3	24518757	24518882	-0.17985	-0.1045	-0.06346	-0.55686	-0.00571	-0.05793	-0.01973
3	24687136	24687270	-0.00022	-1e-05	-3e-05	0	0	-0.12684	-0.11047
3	25437258	25437548	-3e-05	-0.00205	-0.00044	-0.0001	-4e-05	-0.0001	-0.29063
3	25446759	25446941	-0.1958	-0.82525	-0.14374	-0.01665	-0.01675	-0.54187	0.5443
3	25460552	25460683	-7e-05	-0.09012	-0.0178	-0.02198	-0.00072	-0.10989	-0.18834
3	25495392	25495622	-0.02931	-0.01074	-0.01035	-0.00511	-0.0032	0.92275	-0.35503
3	25629089	25629241	-0.01559	-0.00352	-0.01521	-0.00027	-0.0004	-0.34836	-0.0435
3	25712380	25712590	-0.06816	-0.00243	-0.07521	-0.00953	-0.1372	-0.30424	-0.34125
3	25737625	25737769	-0.45445	-0.01895	-0.00258	-0.10488	-3e-05	0.33235	-0.56881
3	25813309	25813418	-0.00745	-0.22986	-0.00781	-0.1917	0.88023	-0.00114	-0.15542
3	25814836	25814993	-0.0964	-0.11346	-0.0009	-0.04504	-0.00187	-0.03482	0.42608
3	25826005	25826185	-0.00015	-0.00378	-0.00278	-0.0001	-0.00014	-0.70937	-0.1376
3	25841233	25841412	-0.00252	-4e-05	-0.00209	-0.0041	-0.00656	-0.46501	-0.60108
3	25905667	25905812	-0.13358	-0.07445	-0.00823	-0.00047	-0.00041	-0.13512	-0.00068
3	25988332	25988565	0.71423	-0.11742	-0.14863	-0.05566	-0.48402	-0.18487	-0.07639
3	26243671	26243831	-0.04151	-0.32878	-0.0053	-0.00471	0	0.58374	-0.17953
3	26586553	26586704	-0.61625	0.81305	-0.18196	-0.84685	-0.00092	0.71919	-0.13644
3	26588562	26588793	-0.1686	-0.00724	-0.04038	-0.35595	-0.00034	-0.00241	-0.2268
3	27068149	27068263	-0.11729	-0.00046	-0.04152	-0.00163	-3e-05	-2e-05	-0.07623
3	27083050	27083187	0.56542	-0.61005	-0.03529	-0.00097	-0.03185	-0.0395	-0.05834
3	27483387	27483579	-0.91936	0.70711	-0.22856	-0.00769	-0.00029	-0.13892	-0.5067
3	27698411	27698612	-0.38965	-0.8139	-0.00225	-0.00233	-0.00013	-0.01003	-0.03873
3	27913513	27913704	-0.00343	-0.00279	-0.00143	-0.1499	-0.00621	0.99595	-0.47456
3	28507537	28507685	-0.03654	-0.03022	-1e-05	-0.00027	0	-0.23265	-0.02604
3	28881137	28881529	-0.67214	0.96616	-0.69002	-0.38764	-1e-05	0.56864	0.07481
3	29133851	29133982	-0.00075	-0.09512	-0.14924	-0.00025	-0.53282	-0.15785	-0.0036
3	29824797	29824911	-0.00233	0	0	-2e-05	-4e-05	-0.00334	-0.10447
3	29849110	29849558	-0.04451	-0.29095	-0.11156	-0.00795	-0.20813	-0.0421	-0.42476
3	29900662	29900853	-7e-05	-0.00073	1	-0.0062	0	-0.14572	-0.38167
3	29922112	29922512	-0.44044	-0.16104	-0.01644	-0.04072	-0.00011	-0.02284	-0.22613
3	30005325	30005481	-0.47914	-0.38495	-0.00184	-0.13957	-0.00195	-0.00625	-0.09632
3	30007655	30007854	-0.01835	-0.05409	-0.00517	-0.21756	-9e-05	-0.12672	-0.01276
3	30162378	30162510	-0.00115	-0.00107	0	-0.00064	0	-0.06861	-0.01327
3	30516843	30516952	0.86646	0.07287	-0.01448	-0.05875	-0.00893	0.56717	0.99999
3	30530723	30531064	-0.99379	-0.24521	-0.06787	-0.85789	-0.0074	-0.90873	-0.20084
3	30577032	30577187	-0.37074	-0.1353	-0.0337	-0.0797	-0.00489	-0.03379	-0.02298
3	30605721	30605894	-0.06608	-0.16178	-0.02935	-0.05979	-0.00182	-0.46991	-0.35905
3	30634701	30634829	-0.00605	-0.00476	-3e-05	-0.00677	-0.00584	-0.00023	-0.59537
3	30771352	30771502	-0.13869	-0.03794	-0.00146	-0.01171	-0.00102	-0.17293	0.99999
3	30780995	30781178	-0.00246	-0.00067	-6e-05	-0.00047	0	-0.03955	-0.03617
3	30980466	30980645	-0.00057	-0.0028	0	-0.00178	-0.00013	-0.26869	-0.03005
3	31323626	31323957	0.63909	0.94068	-0.64546	-0.25976	-0.00029	0.00343	-0.58231
3	31398775	31398892	-0.10143	-0.0256	-4e-05	-0.08024	-0.0008	-0.04847	-0.41225
3	31854223	31854377	-0.62815	-0.01429	-0.00317	-0.02413	-0.02292	0.1033	0.16833
3	31927428	31927557	-0.04269	-1e-05	-0.0025	-0.00024	-0.03391	-3e-05	-0.02143
3	32034016	32034126	-0.00515	-0.00254	0	-0.3688	-0.00017	-0.00341	-0.13387
3	32818517	32818665	0	-0.0001	-2e-05	0	0	-0.00066	-6e-05
3	32922938	32923058	-0.10482	-0.0051	0	1	-0.01194	-0.04289	0.97758
3	33041374	33041519	-0.0084	-0.04497	-0.00279	-0.0071	-0.00012	-0.00349	-0.2702
3	33593330	33593433	0.99999	1	-0.03275	-0.00047	-0.00026	-0.00349	-0.28158
3	33596562	33596688	-0.00495	-0.00022	-0.0002	-0.00107	-1e-05	-0.00296	-0.01098
3	33640139	33640470	0	-3e-05	-4e-05	-0.00061	-0.00185	-0.44739	-0.0011
3	33768677	33768818	-0.01352	-0.02614	-0.0006	-0.02813	-0.0117	-0.86845	-0.00418
3	34228791	34229047	-0.08277	-0.26515	-0.01092	-0.05656	-0.10777	-0.63267	0.84217
3	36365158	36365270	-0.00364	-0.0012	-9e-05	-0.06178	-0.17968	0.63478	-0.89104
3	36750903	36751104	-0.19478	-0.05223	-0.25805	-0.66224	-0.00665	-0.0412	-0.05485
3	37675904	37676064	-0.08236	-0.15154	-0.0011	-0.03277	-0.01306	-0.17369	1
3	39236186	39236344	-0.06582	-0.00238	-0.00045	-0.12288	-0.00093	-0.12076	-0.07468
3	40484806	40484977	-0.00669	-0.03391	-0.09106	-0.00928	-0.00121	-0.04421	-0.90612
3	41376875	41377042	-0.00471	-0.0946	-8e-05	-0.12536	-0.00507	-0.04249	-0.37185
3	41713836	41713987	-0.00267	-0.00037	-0.00032	-0.07962	-0.03526	-0.01452	-0.05273
3	41743556	41743739	-0.01229	-0.01107	-6e-05	-0.00251	-0.02233	-0.00313	-0.00083
3	41883914	41884182	-0.18369	-0.02233	-0.02283	-0.00055	-0.02548	-0.00298	-0.02993
3	42437062	42437189	-0.68622	-0.296	-0.41221	-0.31609	-0.03255	-0.85936	-0.00194
3	42450270	42450504	-0.2453	-0.10308	-0.15607	-0.00499	-0.00769	-0.42842	0.80303
3	43116410	43116595	-0.03275	-0.06925	-0.29935	-0.36607	-0.05677	-0.03096	-0.0269
3	43237040	43237424	-0.09225	0.71987	-0.00087	-0.73633	0.6167	0.8174	-0.07935
3	43245632	43245991	-0.00389	-0.00194	-0.00171	-1e-05	-0.06406	-0.3666	-0.01715
3	43577944	43578059	-0.01275	-0.01158	-0.00088	-1e-05	-0.00069	-0.41047	-0.00077
3	43632075	43632198	-0.13685	-0.0335	-0.00477	-0.07906	-0.02496	-0.12769	-0.14424
3	43738086	43738222	-0.00261	-0.14115	-0.04112	-0.07417	-0.08226	0.39199	-0.21245
3	43782308	43782421	-0.79897	-0.46286	-0.05893	-0.63185	-0.01641	-0.07111	-0.02511
3	43974321	43974678	-0.36206	0.83759	-0.24788	-0.19613	-0.71525	0.92674	-0.89561
3	44009967	44010200	0.7223	0.9382	-0.01941	-0.44884	0.5614	-0.0122	-0.07246
3	44132913	44133014	-0.03043	-0.21259	-0.02208	-0.0008	-0.09933	-0.00633	-0.60457
3	44504929	44505089	0.0083	0.01248	-0.02157	-0.01668	-0.04645	-0.04536	-0.00207
3	46696584	46696725	-0.37235	0.57534	-0.0074	-0.01023	-0.00142	-0.10922	-0.02091
3	47408892	47408993	0	-1e-05	0	-4e-05	-6e-05	-6e-05	-0.06946
3	48098607	48098815	-0.12711	-0.07621	-0.15722	-0.01363	-0.00062	-0.30896	-0.34962
3	48103774	48103976	-0.02651	-0.00661	-0.02578	-0.00935	-0.03801	-0.72657	-0.00142
3	49260230	49260386	-0.36171	-0.15552	-0.03741	-0.00807	-0.00676	-0.00336	-0.00032
3	49705610	49705729	-0.02045	-0.02296	-0.00589	-0.00032	-0.00024	-0.21596	-0.14377
3	50899009	50899187	-0.43262	-0.06085	-0.00013	-0.31495	-0.002	-0.09528	-0.20235
3	50990509	50990728	-0.04333	-0.00281	-0.00112	-0.01923	-0.26643	-0.19242	-0.94969
3	51031217	51031528	-0.04093	-0.06588	-0.07986	-0.24811	-0.21785	0.22467	-0.1141
3	51156000	51156199	-0.01781	-0.00809	-3e-05	-0.00191	0	-0.61758	-0.96201
3	51156214	51156369	-0.03649	-0.04734	-0.00213	-0.03642	-0.21442	-0.95903	-0.09803
3	51208782	51209145	-0.02518	-0.04689	-0.5626	-0.03093	-0.02626	-0.23177	-0.01388
3	51268031	51268297	-0.31638	-0.00055	-0.00376	-0.13743	-0.00648	-0.62076	-0.681
3	51543873	51544001	-0.00074	-0.00369	-0.0103	-0.06766	-0.00217	-0.00831	-0.24337
3	51563419	51563533	-0.18992	-0.57891	-0.0264	-0.50931	-0.01491	-0.18721	-0.10999
3	51613663	51613926	-5e-05	-5e-05	-0.0003	-0.00152	-0.02847	0.58086	-0.35866
3	52780269	52780376	-0.00205	-0.00367	-0.00203	-0.03877	-0.0109	-0.86639	-0.04061
3	52794656	52794767	-0.03754	-0.04382	-0.00435	-0.03423	-0.0958	-0.02053	-0.07253
3	52868340	52868489	-0.0262	-0.00207	-0.00108	-0.00995	-0.03622	-0.14221	-0.0138
3	52917053	52917320	-0.33747	-0.04974	-0.0013	-0.0188	-0.03782	-0.04527	-0.03197
3	52920349	52920501	-0.00526	-0.02976	-5e-05	-0.16282	-0.14149	-0.15595	-0.07078
3	53637622	53637775	-0.00754	-0.1426	-0.38786	-0.05291	-0.00365	-0.12643	-0.38587
3	53755840	53756010	-0.39544	-0.61979	-0.00254	-0.03536	-0.10114	0.46117	-0.08082
3	53851725	53851994	-0.00779	-0.00215	-0.01665	-0.00395	-0.00076	-0.00119	-0.00352
3	54104075	54104221	-0.00332	-0.00122	-0.00434	-0.00021	-0.00043	-0.00212	-7e-05
3	54111326	54111532	-0.18601	-0.04288	-0.07258	-0.00866	-0.01522	-0.03566	0.99999
3	54128890	54129098	-0.17764	-0.04032	-0.06877	-0.00804	-0.01425	-0.03363	1
3	54183320	54183423	-0.02465	-0.00226	-0.23772	-0.00393	-0.00418	-0.03636	-0.04129
3	54303440	54303605	0	0	0	0	0	0.99999	-0.00356
3	54307612	54307843	-2e-05	-0.00026	-0.00957	-0.32072	-0.40307	-0.75251	-0.79959
3	54532610	54532710	-0.31373	-0.03982	-0.34366	-0.01349	-0.00165	-0.17312	-0.00335
3	56470908	56471011	-0.01152	-0.00506	-0.05818	-0.00286	-0.0004	0.93053	-0.15226
3	56552276	56552791	-0.04392	-0.00387	-0.19624	-0.70653	-0.47969	0.94509	0.55863
3	56591963	56592290	-0.22633	-0.11841	-0.09175	-0.00031	-0.01935	-0.03169	-0.83655
3	56807211	56807329	-0.00171	-1e-05	-5e-05	-0.00262	-0.00156	-0.03237	-0.01589
3	56888714	56888959	-0.08791	-0.01335	-0.15935	-0.09594	-0.0004	-0.11083	-0.00062
3	56934667	56934784	-0.00035	-0.00495	-0.12205	-0.09189	-0.04974	-0.72243	-0.00168
3	57811676	57811799	0	-1e-05	0	-3e-05	0	-0.00013	-1e-05
3	57902974	57903121	-0.0036	-0.06431	-0.03219	-0.00024	-4e-05	-0.01971	-0.01914
3	57922427	57922573	-0.11661	-0.42825	-0.62461	-0.28586	-0.25709	-0.01294	-0.87711
3	58946037	58946304	-0.27652	-0.04668	-0.01339	-0.02944	-9e-05	-0.00091	-0.04141
3	58952028	58952159	-0.00112	-0.00351	-0.01185	-0.00553	0	-0.00022	-0.04609
3	59478802	59479067	-0.00171	-0.00553	-0.0029	0	0	-0.01132	-0.14267
3	59519972	59520264	-0.00112	-0.00096	-0.00565	-0.00042	-0.00011	-0.34991	-0.10097
3	59656284	59656402	-0.25006	-0.14045	-0.00123	-0.00406	-0.00228	-0.02307	-0.00564
3	59784949	59785079	0.89348	-0.02632	-0.01653	-0.10986	-0.00585	-0.07556	-0.00051
3	59790869	59791026	0.82704	-0.04551	-0.00793	-0.14647	-0.01055	-0.19875	-0.00032
3	60302716	60302820	-0.06959	0	-0.31705	-0.31194	0.41527	-0.8004	0.67658
3	60589587	60589720	-0.03733	-0.01799	-0.20915	-0.10491	-0.00037	-0.00717	-0.02742
3	60639722	60639834	-0.4294	-0.81636	-0.00954	-0.82038	-0.17625	-0.4219	-0.00626
3	60861257	60861425	-0.02468	-0.01055	-0.0776	-0.00102	-0.00186	-0.57507	-0.67269
3	60876862	60877030	-0.02468	-0.01055	-0.0776	-0.00102	-0.00186	-0.57507	-0.67269
3	60901780	60901916	-0.8707	-0.40325	-0.04722	-0.31942	-0.33305	0	-0.50738
3	60968154	60968335	-0.09095	-0.00465	-0.00021	-0.00033	-0.0107	-0.01116	-2e-05
3	61100572	61100798	-0.15911	-0.03731	-2e-05	-0.00101	-1e-05	-0.68859	-0.00035
3	61610186	61610308	-0.00712	-0.00165	-0.0003	-9e-05	-0.01656	-0.5248	0.72504
3	61819280	61819384	-0.00101	-0.06589	-0.1016	-0.04554	-0.06234	-0.00302	-0.57423
3	61955223	61955413	-0.14007	-0.12973	-0.0105	-0.01849	-0.0507	-0.09484	-0.31771
3	62436986	62437135	-0.01561	0.94842	-0.26788	-0.01174	-0.00036	-0.14775	-0.07839
3	63161024	63161147	-0.00563	-0.02736	-0.11609	-0.02119	-0.00077	-0.00055	0
3	63519114	63519217	-0.14754	-0.4558	-0.0205	-0.21344	-0.47555	-0.0342	-0.00012
3	63591114	63591285	-0.23493	-0.03652	-0.05551	-0.00181	-0.00059	-0.00025	-0.19445
3	64850360	64850647	-0.05415	-0.04823	-0.01426	-0.00134	-0.00445	-0.01042	-0.0001
3	64877255	64877358	-0.01145	-0.00173	-0.0088	-0.00106	-2e-05	-0.0001	-0.03985
3	64936235	64936378	-0.00928	-0.01514	-0.00849	-0.0991	-0.00052	-0.07243	-0.71996
3	64958153	64958451	-0.02056	-0.06269	-0.11622	-0.00647	-0.01262	-0.96998	0.57025
3	65237153	65237337	-7e-05	-0.00123	-0.00022	-1e-05	-0.00023	-0.00141	-0.55706
3	65241718	65241856	-0.01148	-0.04278	-0.00068	-0.00076	0	-0.1768	-0.14055
3	65528182	65528419	-0.00385	-0.04784	-0.00384	-0.0345	-0.00031	-0.29154	-0.0571
3	65649093	65649218	-0.08438	-0.0201	-0.03829	-0.00225	-4e-05	-0.07847	-0.66683
3	65959271	65959533	-0.43085	-0.01745	-0.00387	-0.03219	-0.00032	-0.00254	-0.00483
3	66339883	66340226	-0.35112	-0.01653	-0.00072	-0.00317	-0.0004	-0.30015	-0.77939
3	69121672	69121869	-0.08149	-0.0241	-0.00197	-0.47185	-0.00643	-0.00095	-0.63327
3	69576735	69576853	-0.10818	-0.00074	-0.00125	-0.16398	-0.00294	0.55152	-0.74631
3	69614767	69614983	-0.0105	-0.04547	-0.00024	-0.17819	-0.29898	-0.56354	-0.61909
3	70383772	70383915	-0.00286	-0.00175	-1e-05	-0.00107	-0.00015	-0.20152	-0.71704
3	71227609	71227750	-0.32455	-0.02764	-0.08595	-0.00277	-0.05461	-0.12825	-0.21874
3	71252277	71252404	-0.00042	-0.00097	-0.00165	-0.02076	-0.40087	-0.02405	-0.138
3	71282398	71282569	-3e-05	-0.00197	-0.00023	-0.13584	-0.03279	-0.81614	-0.0749
3	71806315	71806594	0.64342	-0.35737	-0.00276	0.7834	-0.00083	-0.01379	0.54224
3	71895904	71896017	-0.02034	-0.55151	-0.10804	-0.05137	-0.06383	-0.17054	-0.09003
3	72045947	72046141	-0.08308	-0.11924	-0.00464	-0.0035	-0.01627	-0.02914	-0.01014
3	72108950	72109107	-0.10701	-0.2127	-0.0369	-0.00012	-0.00224	-0.03871	-0.00769
3	72255591	72255736	-0.06388	-0.16113	-0.33945	-0.10823	-3e-05	-0.45967	0.62121
3	72507091	72507202	-0.18536	-0.06208	-0.01879	-0.02077	-0.2976	-0.01367	-0.56495
3	72600282	72600463	-0.00177	-7e-05	-0.53631	-0.00713	-0.04903	0.67011	0.24383
3	72637857	72638014	-0.02566	-0.01088	1	-0.07654	-8e-05	-0.00536	-0.00266
3	73187643	73187796	-0.06614	-0.00105	-0.0032	-0.00928	-0.0074	-0.61377	-0.12628
3	73238160	73238269	-0.02937	-0.00593	-0.00039	-0.00091	-0.01019	-0.14471	-0.27572
3	73565695	73565807	-0.00082	-0.06432	-0.00365	-0.00236	-0.00033	-0.00084	-0.03831
3	73666795	73666961	-0.06548	-0.00286	0	-0.09731	-4e-05	-0.02498	-0.06973
3	73832752	73832854	-0.01548	-0.09402	-0.00412	-0.00139	-0.35758	-0.38435	-0.62817
3	73866243	73866416	-0.16172	-0.17349	-0.00075	-0.03128	-0.01248	-0.02763	-0.14917
3	73994164	73994271	-0.27672	-0.07564	-0.00879	-0.00174	-0.06675	0.93579	0.7939
3	74976731	74976941	-0.43855	-0.05738	-0.36726	-0.00189	-0.00032	-0.22795	-0.2829
3	75045303	75045505	-0.21387	-0.00693	-0.00702	-0.00145	-0.00043	-0.36072	-0.79499
3	75301153	75301338	-0.02833	-0.15087	-0.00096	-0.0265	-0.01843	-0.15258	-0.0318
3	75313122	75313234	-0.0204	-0.00121	-0.00133	-0.00836	-0.00069	-0.00231	-0.02221
3	76219888	76220021	0	-0.00048	-0.00488	-0.00087	-0.00022	-0.04085	-0.00015
3	76439654	76439838	-0.21978	-0.07809	-0.20437	-0.01495	-3e-05	-0.002	-0.12609
3	77368652	77368789	-0.00052	0	-0.0003	-0.00035	-9e-05	-0.01751	-0.06043
3	77396706	77396978	-0.00135	-0.01335	-0.00502	-0.07026	-0.54897	-0.11298	-0.00955
3	77505081	77505194	-0.00222	-0.01923	-0.04137	-0.01634	-0.1762	-0.00012	-0.98235
3	77507240	77507477	-0.01727	0.81264	-0.15834	-0.01437	-0.28232	-0.02677	-0.39162
3	77553361	77553520	-0.10035	-0.07966	-0.16848	-0.08385	-0.02943	-0.12533	-0.0076
3	77583122	77583241	-0.00506	-0.05108	-0.09437	-0.232	-0.58294	-0.00208	0.80394
3	77702515	77702650	-0.21854	-0.26528	-1e-05	-0.0148	-0.00031	-0.49575	-0.00449
3	77718675	77718796	-0.02755	-0.07229	-0.03765	-0.02425	-0.00087	0.44379	-0.47673
3	77737329	77737572	-0.00344	-0.0011	-9e-05	-0.083	-0.04597	-0.32898	-0.00296
3	77944032	77944252	-0.00109	-0.00547	-0.00653	-0.12595	-1e-05	-0.00097	-0.04364
3	78480595	78480775	-0.4149	-0.2469	-0.05294	-0.00482	-0.12313	-0.00231	-0.19296
3	78982310	78982682	-0.2482	-0.01462	-0.08283	-0.00967	-0.00054	-0.36272	-0.80883
3	79735890	79736019	-0.20767	-0.40822	-0.00021	-0.07862	-0.44923	-0.27067	-0.30871
3	79825531	79825696	-0.18676	-0.41399	-0.19036	-0.07192	-0.02471	-0.11464	-0.00177
3	80259428	80259574	0.98326	-0.54167	-0.00073	-0.01625	-0.00017	-0.14285	-0.31346
3	81106974	81107211	-3e-05	0	-1e-05	-6e-05	0	-0.00233	-0.00904
3	82632338	82632457	-0.17017	-0.21299	-0.00903	-0.0056	-0.00086	-0.00028	0.62987
3	83952007	83952171	-0.70903	-0.48643	-0.21085	-0.01717	-0.00641	-0.13986	-0.26237
3	84009111	84009213	-0.004	-0.00302	-0.00439	-0.00011	-0.0037	-0.00184	-0.01505
3	85203047	85203217	-0.00164	-0.00535	0	-0.00801	-0.03652	-0.81667	0.13513
3	85382179	85382512	-0.02147	-0.04904	-0.04671	-0.01588	-0.036	-0.62288	-0.03479
3	85831593	85831789	-0.0245	-0.02125	-0.00071	-0.01563	-0.02548	0.80757	-0.72463
3	86210993	86211123	-0.00704	-0.00109	-0.02794	-0.02634	-0.0849	-0.34247	-1e-05
3	86580855	86581145	-0.00039	0	0	-0.01713	-0.04805	-0.00982	-0.02392
3	86850876	86851157	-0.12537	-0.07849	-0.18401	-0.00344	-0.00573	-0.21119	-0.02306
3	86882712	86882966	-0.33012	-0.18262	-0.00077	-0.00341	-0.27956	-0.00309	-0.00093
3	86916209	86916321	-0.10778	-0.43745	-0.04054	-0.04993	-0.02282	-0.01109	-6e-05
3	86926722	86926893	-0.473	-0.74946	-0.0056	-0.47602	-0.08417	-0.11562	-0.04721
3	87711028	87711128	-0.00763	-0.00152	-0.00248	-0.00019	-3e-05	-0.04849	-0.11382
3	87736733	87737164	-8e-05	-0.07105	-0.00604	-0.19426	-0.03063	0.96986	0.47841
3	87794684	87794881	-1e-05	0	0	-6e-05	-0.00031	-0.01835	-0.14801
3	87871485	87871612	-0.19089	-0.05549	-0.01317	-0.26823	-0.13047	-0.00873	-0.00232
3	88432749	88432981	-0.05773	-0.00507	-0.00454	-0.0043	-0.02606	-0.8525	-0.02248
3	88803231	88803548	-0.00777	-0.01991	-0.00413	-0.44716	-0.00022	-0.13969	-0.20695
3	89434773	89434938	-0.00178	-0.1359	-0.39282	-0.09008	-0.06935	-0.43089	-0.11624
3	89451670	89451974	-0.03158	-0.00244	-0.00093	-0.00145	-0.03588	-0.7485	-0.06876
3	89713713	89713892	-0.02975	-0.03681	-0.02532	-0.01609	-0.27303	0.87674	-4e-05
3	89728963	89729117	-0.00722	-0.0049	-0.00329	-0.00966	-0.02243	-0.00749	-0.67717
3	89869445	89869645	-0.01626	-0.00548	-2e-05	0	0	-0.05946	-0.00526
3	90022915	90023150	-0.42781	-0.53676	-0.00821	-0.01213	-0.01495	-0.0789	-9e-05
3	90098216	90098404	-0.00779	-0.01977	-0.02814	-0.29208	-0.00278	-0.0831	-0.05958
3	91117750	91117858	-0.00711	-0.15307	-0.00102	-0.0008	-0.00053	-0.07709	-1e-05
3	91492990	91493231	-1e-05	-0.01724	-0.0099	-0.18623	-0.02995	0.48666	-0.44047
3	91608818	91608958	-0.00583	-0.04817	-0.10318	-0.02408	-0.00866	-0.03406	-0.10446
3	92677496	92677684	-0.00014	-9e-05	0	0	-1e-05	-0.01169	-0.00031
3	93397824	93398191	0	-1e-05	-0.0001	0	-0.00328	-6e-05	-0.09358
3	93601467	93601583	-0.36397	-0.25087	-0.00727	-6e-05	-0.06631	-0.19383	-0.25098
3	93691349	93691539	-0.02111	-0.00772	-9e-05	-0.48331	-0.15378	-0.00415	-0.09163
3	93737693	93738030	-0.14903	-0.04599	-0.01126	-0.70448	-0.02379	-0.18718	-0.06081
3	93825268	93825380	-0.15375	-0.08467	-0.00318	-0.00599	-0.011	-0.23855	-0.96742
3	93831831	93832046	-0.29918	-0.13201	-0.02587	-0.20892	-0.04808	-0.18743	-0.12423
3	93966866	93967209	-0.07691	-0.01337	-0.00044	-0.02561	-0.00703	-0.0893	-0.03197
3	93986041	93986176	-0.11565	-0.00136	-0.38431	-0.26179	-0.09868	-0.04617	0.61645
3	94546832	94547006	-0.00092	-0.01443	-0.00035	-0.35933	-0.70521	-0.65447	-0.45385
3	94660324	94660449	-0.08353	-0.05198	-0.00969	-5e-05	-0.05584	-0.27196	-0.0063
3	95014152	95014323	-1e-05	-1e-05	-0.00034	-0.00066	-0.00014	-0.0042	-0.47124
3	95016964	95017081	-0.00737	-0.02372	-0.02225	-0.0028	0	-0.02621	-0.03301
3	95075454	95075565	-0.03151	-0.00224	-0.00145	-0.00057	-0.02849	0	-0.00352
3	95114775	95115000	-0.24613	-0.31968	-0.00083	-4e-05	-0.00186	-0.05529	-0.24743
3	95129933	95130064	-0.00878	-0.00755	-0.17438	-0.61092	-0.13171	-0.73093	-0.31829
3	95757660	95757777	-0.00063	-0.00023	-0.00733	-0.65799	-0.00109	-0.02965	-0.01344
3	95827208	95827339	-0.64349	-0.00946	-0.03695	-0.01855	-0.12491	-0.70045	-0.2097
3	95879847	95879959	-0.05183	-0.00155	-0.00773	-0.00122	-0.008	-0.00232	0
3	95973229	95973366	-0.0074	-0.00092	-0.00816	-0.00034	-0.01124	-0.03092	-0.39641
3	95975162	95975742	-0.15564	-0.79242	-0.14232	-0.08361	-0.00013	-0.01867	-0.40825
3	96053601	96053772	-7e-05	0	-1e-05	-0.00018	0	-0.0391	-2e-05
3	96247682	96247814	-0.07329	-0.00697	-0.13181	-0.263	-0.00158	-0.15871	-0.00063
3	98031160	98031360	-0.02728	-0.04398	-0.05733	-0.58045	-0.00026	-0.12286	-0.11271
3	98305138	98305239	-0.12126	-0.1389	-0.05486	-0.0489	-0.01147	-0.00475	-0.11622
3	98328041	98328537	-0.50191	-0.01986	-0.07105	-0.10581	-0.00144	-0.02082	-0.00508
3	98749790	98749930	-0.02517	-0.07467	-7e-05	-0.05724	-0.2313	0.6904	-0.00327
3	98749936	98750113	-0.14442	-0.00526	-0.19008	-0.00032	-0.00309	-0.63255	-0.10109
3	99223106	99223229	-0.7529	-0.10018	-0.09723	-0.07798	-0.00518	-0.17595	-0.01982
3	99461546	99461900	-0.00044	-0.00048	0	-0.00064	-0.00259	-0.00774	-0.10353
3	99619002	99619187	-0.00036	-0.00796	-0.00029	-8e-05	-0.0065	-0.00714	-0.0611
3	99659481	99659645	-0.06207	-0.00307	-0.00485	-0.00836	-0.00717	-0.00832	-0.59847
3	99804298	99804400	-0.1445	-0.00177	-0.00048	-0.0007	-0.00101	-0.03138	-0.00975
3	100579487	100579647	-0.00608	-0.00541	-0.0002	-0.08854	-0.00058	-5e-05	-0.0239
3	100583627	100583770	-0.00114	-8e-05	0	-0.00102	-0.00075	-0.08051	-0.00028
3	100766180	100766289	-0.07887	-0.02004	-0.00498	-0.0371	-0.0137	-0.26151	-0.02159
3	100913095	100913207	-0.18825	-0.05947	-0.3185	-0.00713	-0.00154	-0.58473	-0.00781
3	101102084	101102379	-0.03465	-0.01329	-0.0066	-0.10177	-0.00021	-0.53824	-0.44342
3	101195351	101195578	-0.06135	-0.12161	-2e-05	-0.00056	-0.00739	-0.00885	-1e-05
3	101198972	101199078	0.77701	-0.11053	-0.22889	-0.10612	-0.0193	-0.19905	-0.02904
3	101210236	101210340	-0.01481	-0.23944	-0.04043	-0.6573	-0.11595	-0.0146	-0.10531
3	101340803	101341275	-0.00216	-0.03497	-0.00422	-0.00128	-0.00087	-0.02873	-0.00474
3	101441988	101442266	-0.67841	0.79014	-0.07893	0.90287	-0.00553	-0.0796	-0.1206
3	102460487	102460627	-0.0199	-0.02063	-0.00032	-0.00037	-2e-05	-0.00358	-6e-05
3	102561640	102561841	-3e-05	0	-1e-05	-0.0003	0	-0.02829	-0.00403
3	102570173	102570315	1	0.99998	-5e-05	-0.20009	-0.00069	-0.1417	0.79621
3	102570317	102570421	1	1	-0.17395	-0.3502	-0.00039	-0.04486	-0.02593
3	102602609	102602753	-0.00017	-0.00014	-0.00477	-0.00195	-0.07575	-0.77849	-0.0936
3	102714891	102715122	-0.00011	-3e-05	-0.00102	-0.00016	-0.00069	-0.11169	-0.15964
3	102793289	102793620	-0.10378	-0.00023	-0.01298	-0.0009	-0.00125	-0.05943	-0.02478
3	102841769	102842097	-0.0341	-0.028	-0.20872	-0.00823	-0.00517	-0.00016	-0.07482
3	102900000	102900128	-0.04296	-0.00032	-0.08418	-0.00162	-0.00078	-0.1271	-0.09392
3	103245384	103245621	-0.52878	-0.07779	-0.21967	-0.00222	-4e-05	-0.0575	-0.02175
3	103490091	103490342	-0.48791	-0.04391	-0.01841	-0.25462	-0.00593	0.08116	0.18127
3	103520673	103520902	-0.0301	-0.3292	-0.13275	-0.26479	-4e-05	-0.27343	-0.2211
3	103601953	103602314	-0.08348	-0.0008	-0.02081	-0.12365	-0.01434	-0.48353	-0.21846
3	103637878	103638069	-0.14114	-0.15635	-0.01864	-0.165	-0.04632	-0.16914	-0.72485
3	103779139	103779358	-7e-05	0	-0.00117	-9e-05	-1e-05	-0.06789	-0.02371
3	103779515	103779640	0	-3e-05	-3e-05	0	-1e-05	-0.00012	-4e-05
3	103950966	103951145	-0.00127	-0.02267	-0.00034	-0.41714	-0.00194	-0.62244	-0.08919
3	104048467	104048804	-0.0226	-0.00081	-0.00047	-0.01653	-0.01132	-0.00468	-0.06597
3	104066582	104066789	0	0	-0.00028	-2e-05	0	-7e-05	-0.00092
3	104146304	104146491	-0.00117	-2e-05	-0.18506	-0.21258	-0.04555	-0.20539	-0.25185
3	104196385	104196514	0.77135	-0.46907	-0.89773	-1e-05	-0.00923	0.56961	0.63334
3	104287507	104287756	-0.001	-0.00157	-0.05052	-0.06501	-0.00011	-0.67834	-8e-05
3	104356345	104356608	-0.00998	-0.03481	-0.00271	-0.02588	-0.02527	-0.00605	-0.34001
3	104689810	104689946	-6e-05	-0.00014	-0.00012	-0.0008	-0.00016	-3e-05	-0.05023
3	106657428	106657548	-0.00329	-0.00047	-7e-05	-0.00489	-0.00037	-0.00121	-0.04591
3	106853658	106853782	-0.0009	-2e-05	0	-0.11002	-2e-05	-0.00248	-0.00725
3	108188860	108189058	-0.06774	-0.03872	-0.06792	-0.01263	-0.21086	-0.23038	-0.82606
3	108457416	108457520	-0.39899	-0.13993	-0.25598	-0.01856	-0.00223	-0.0686	-0.01666
3	108666141	108666270	-0.06033	-0.06353	-4e-05	-0.0065	-0.00011	-0.00043	-0.00317
3	109410731	109410881	-0.00062	-0.01712	-0.00737	-0.00164	-0.0641	-4e-05	0.92751
3	109424690	109424862	-0.09428	-0.21263	-0.00022	-0.00686	-0.00502	-0.1777	0.14982
3	109513076	109513457	-0.04516	-0.07	-0.01971	-0.00104	-0.0215	-0.1591	-0.12498
4	1929127	1929354	-0.02943	-0.00236	-0.00038	-0.80678	-0.0284	-0.01725	-0.03195
4	4416339	4416518	-0.04373	-0.06136	-0.0942	-0.00656	-0.15855	-0.32996	-0.1417
4	4437117	4437464	-0.08136	-0.00355	-0.01227	-0.00013	-0.07082	-0.0412	-0.49435
4	4554379	4554621	-0.29729	-0.51663	-0.00222	-0.00167	-0.06681	-0.00093	-0.09196
4	5390459	5390880	-0.01827	-0.26452	-0.26778	-0.266	0.5423	-0.0137	-0.52904
4	5397519	5397637	-0.00126	-0.02013	-0.0129	-0.0052	-0.00689	-0.00068	-0.006
4	6274203	6274389	-0.00415	-0.00259	-0.29675	-0.04468	-0.00026	-0.00719	-0.06384
4	6796669	6796810	-0.00398	-0.00013	-0.00063	-0.05449	-0.02103	-0.00483	-0.09338
4	7312621	7312751	-0.00567	-0.29881	-0.00516	-0.00217	-0.00023	-0.92169	-0.05709
4	7428934	7429088	-0.00051	-0.0029	-0.00046	-0.00229	-0.00801	-0.00452	-0.01379
4	7898361	7898481	-0.61646	-0.06067	0	-0.05865	-0.01666	-0.12032	-0.27435
4	8022103	8022298	-0.09784	-0.00033	-0.00088	-0.03126	0	-0.01134	-0.01063
4	8046495	8046641	-0.0993	-0.13558	-0.00262	-0.41851	-0.16815	-0.14446	-0.03909
4	8233031	8233193	-0.00012	0	-1e-05	0	-3e-05	-0.00021	0.69778
4	8270473	8270845	-0.01348	-0.01411	-0.00257	-0.01788	-0.00223	0.86263	-0.46597
4	8300466	8300604	-0.00162	-0.00234	-0.00285	-0.005	-0.00433	-0.0001	-0.00551
4	8422721	8422934	-0.00058	-0.00043	-2e-05	-0.00411	-0.00102	-0.04535	-0.00215
4	8679029	8679137	-0.00035	-0.00245	-6e-05	-0.00982	-9e-05	-0.04037	-0.01138
4	9647783	9647940	0.23306	-0.13878	-0.02705	0.97114	-0.0036	0.18012	-0.01708
4	13537381	13537500	-0.01233	-0.13236	-0.01348	-0.00041	-0.00014	-0.77319	-0.48488
4	13574825	13574933	-0.03665	-0.36936	-0.03042	-0.00019	-0.01506	-0.72803	-0.23431
4	13597255	13597537	-0.25244	-0.39849	-0.00482	-0.02638	-0.00134	-0.06248	-0.87037
4	13602226	13602793	0.7424	0.85993	-0.72582	-0.02008	0	0.7317	0.30729
4	13617652	13618119	-0.03823	-0.00013	-0.00173	0	-1e-05	-0.30561	0.53985
4	13621290	13621453	-0.0144	-0.00876	-0.00599	-1e-05	-0.00052	-0.38101	-0.56718
4	13621773	13621929	0.81699	0.44175	-0.00398	-0.00217	-0.44179	-0.43593	-0.84111
4	13622667	13622838	-0.00015	-4e-05	-0.05041	-0.05616	0	0.3115	-0.16679
4	13630291	13630493	-3e-05	-0.00223	-0.00658	-0.06558	-2e-05	-0.27462	-3e-05
4	13643827	13644369	-0.92323	-0.47227	-0.35981	-7e-05	-0.0001	0.02235	0.91644
4	13670039	13670151	0.873	-0.95885	-0.1318	-0.00135	-0.008	-0.09639	-0.57495
4	13873281	13873499	1	-0.66653	0.44501	-0.12254	0	-0.71264	-0.06643
4	13886036	13886251	-0.04355	-0.20911	-0.03417	-0.00081	0	-0.6976	-0.64696
4	13890666	13890795	-0.01853	-0.02179	-0.01223	-0.12527	-4e-05	-0.09033	-0.47984
4	14350491	14350703	0.61843	0.80174	-0.80304	-0.01056	0	-0.89206	0.50496
4	14434793	14434974	1	0.99999	-0.00325	-0.02573	-4e-05	-0.5164	-0.48457
4	14479983	14480091	-0.00157	-0.02366	-0.00207	-0.02005	-6e-05	-0.22673	-0.94007
4	14506616	14506787	-0.95215	-0.7232	-0.04243	-0.00013	-0.31006	0.19929	0.12961
4	14508847	14509009	-0.31327	-0.28811	-0.02831	-0.10039	-0.10095	0.20189	-0.17093
4	14525229	14525449	-0.00012	0	-2e-05	-0.00061	-0.00046	-0.02681	-0.06254
4	14577164	14577305	-0.00065	-0.00107	-1e-05	-0.26559	-2e-05	-0.40464	-0.24671
4	14616053	14616433	-0.01444	-0.00446	-0.0002	-0.00012	-0.00017	-0.02763	-0.18081
4	14670439	14670586	-0.00298	-0.00099	-0.05669	-0.60882	0.25367	-0.26857	-0.03182
4	14807219	14807424	-0.42969	-0.12533	-0.25111	-0.00142	-0.01767	0.94212	-0.07828
4	14818015	14818245	-0.00014	-0.00502	-1e-05	-0.00362	-0.01922	-0.01314	-0.01148
4	14896361	14896461	-0.01032	-0.00056	-0.00032	0	-4e-05	-0.00606	-7e-05
4	14968074	14968293	0	-0.00031	-2e-05	-0.01855	0	-0.0032	-0.0554
4	15027095	15027268	-0.00248	-0.00076	-0.00011	-0.00048	-0.00191	-0.00537	-0.00262
4	15095714	15095867	-0.66169	-0.49687	-0.02189	-0.03672	-0.02335	-0.28974	0.73982
4	15466849	15466975	-0.00806	-0.0497	-0.07786	-0.18272	-0.01884	-0.00267	-0.44422
4	15587957	15588097	-0.02661	-0.47535	-0.00825	-0.00314	-0.05762	-0.02677	0.71691
4	15891764	15892125	-0.50739	-0.01395	-0.028	0	0	-0.00858	-0.1758
4	16020650	16020850	-0.13048	-0.02664	-0.00523	-0.00426	-3e-05	-0.02783	-0.17007
4	16032849	16032955	-0.26778	-0.46276	-0.02953	-0.05607	-0.02017	-0.13041	-0.00035
4	16146089	16146322	-0.00025	-1e-05	-0.00796	0.37768	-0.1496	0.49438	0.15765
4	16247524	16247703	1	1	-0.01628	-0.00077	-1e-05	-0.00017	0
4	16259390	16259736	-0.00929	-0.02612	-8e-05	-0.00119	-4e-05	-0.10239	-0.0755
4	16293747	16293893	-0.301	-0.05193	-0.00488	-0.01689	-0.03565	-0.00077	-0.45864
4	16877260	16877499	-0.02907	-0.21293	-0.00514	-0.00046	-0.00164	-0.01899	0.43885
4	17183330	17183588	-0.13842	-0.08878	0.99999	-0.00472	-0.00102	-0.61698	-0.0717
4	17201772	17202043	-0.02024	-0.03085	-0.0041	-0.14232	-0.00018	-0.0365	0.1083
4	17857661	17857922	-0.26966	-0.34258	-0.01059	-1e-05	-0.00134	0.99786	0.01476
4	17870930	17871405	-0.54693	-0.80269	-0.1472	-0.00167	-0.00024	-0.23309	0.18074
4	17986003	17986132	-0.06323	-0.00069	-0.00038	-0.0356	-1e-05	-0.01135	0.4065
4	17986706	17986923	0.07628	0.05937	-0.09136	-0.00102	-0.0149	-0.37161	-0.2497
4	18052244	18052362	-0.07894	-0.04695	-0.02442	-0.00467	-0.02157	-0.03015	-0.40851
4	18093779	18094053	-3e-05	-0.00049	0	0	-0.0012	-0.00219	-0.05115
4	18186396	18186927	-0.23302	-0.03789	-0.00492	-7e-05	0	-0.34203	-0.16873
4	18289374	18289532	-0.05377	-0.62328	-0.01983	-0.00421	-0.00022	-0.19795	0.50293
4	18354864	18355078	-0.9443	-0.19425	-0.2227	-0.00361	-0.00519	-0.03874	0.93665
4	18410707	18410977	-0.24235	-0.07264	-0.01943	-0.00503	-0.0004	-0.50939	0.82777
4	18426815	18427079	-0.00366	-0.12375	-0.0318	-0.14898	-0.45108	-0.00916	-0.09039
4	18548947	18549148	-0.05706	-0.49009	-0.01526	-6e-05	-0.06595	-0.22555	-0.03555
4	18644533	18644960	-0.77562	-0.10455	-0.85803	-0.01412	-0.01552	-0.8185	-0.80204
4	20048129	20048425	-0.31096	-0.51662	-0.00652	-0.00315	-0.0008	-0.71491	0.86767
4	20260658	20260833	-0.00174	0	-0.00244	-0.00038	-0.90445	-0.95431	-0.00448
4	20891997	20892109	-0.08186	-0.00397	-0.01607	-0.05156	-0.19439	-0.14281	0.78234
4	21418149	21418315	-0.02687	-0.04928	-0.02937	-0.00116	-0.10974	-0.02966	-0.57288
4	21525102	21525236	-0.20977	-0.20696	-0.0074	-6e-05	-0.00165	-0.09839	-0.08114
4	24311455	24311589	-0.06034	-0.3779	-0.0075	-0.04663	-0.02416	-0.27489	-0.23353
4	24441256	24441380	0	-0.01714	-0.81575	0.5101	-0.33854	0.24402	-0.35921
4	24660592	24660697	-0.22565	-0.00929	-0.00188	-0.12535	-1e-05	-0.16744	-0.37487
4	25808848	25809034	-0.05149	-0.06902	-0.00479	-0.00316	-0.00013	-0.0647	-0.68974
4	25831908	25832128	0	0	0	0	0	0	0
4	25834824	25834958	-0.0507	-0.00507	-0.00211	-0.00237	-0.00231	-0.01066	-0.10776
4	25834967	25835094	-0.00209	-0.00201	-0.00012	-0.07616	-0.00035	-0.08745	-0.00579
4	25845618	25845730	0	-2e-05	0	-1e-05	0	0	0
4	25887150	25887301	-0.00377	-0.00052	-7e-05	0	0	-0.03761	-0.01296
4	25907237	25907642	-0.00112	-0.00582	-0.00958	-0.00332	-0.04023	-0.00159	-0.00022
4	25947661	25948076	-0.16761	-0.16219	-0.14093	0.90195	-0.00322	-0.00725	-0.00247
4	25950544	25950664	-2e-05	-9e-05	0.99999	-6e-05	-0.00024	-0.02207	-6e-05
4	26103612	26103802	0	0	0	1	-2e-05	-0.00069	-0.0193
4	26148875	26149079	-0.00382	-0.00029	-0.00088	-0.00018	-0.00586	-0.19234	-0.22104
4	26234361	26234528	-0.3943	-0.07746	-0.06242	-0.00048	-0.06726	-0.01036	-0.04027
4	26410929	26411103	-0.20589	-0.05756	-0.00102	-0.02326	-0.03626	-0.00011	-0.04943
4	26425608	26425737	-0.00235	-0.00079	-0.00097	-0.00346	-0.00127	-0.41058	-0.01009
4	26479963	26480345	-0.0021	-2e-05	-0.00013	-0.00015	-9e-05	-0.00155	-0.00048
4	26493717	26493910	-0.00076	-0.0032	0	-0.02185	-0.00774	-0.10906	-0.00916
4	26513633	26513755	-0.71049	-0.26934	-0.16407	-0.16279	-0.00016	-0.0005	-0.1523
4	26516985	26517087	-9e-05	-1e-05	-0.0002	-0.0086	-0.07976	-0.00356	0
4	26533156	26533360	-0.01443	-7e-05	-1e-05	0	0	-0.00013	-4e-05
4	26550405	26550562	-0.0001	-1e-05	-2e-05	-2e-05	-0.00043	-0.00013	-1e-05
4	26553759	26553977	-0.00398	-0.00655	-0.0012	-0.00168	-0.02316	-0.00015	-4e-05
4	26569633	26569913	-0.00598	-0.00076	-5e-05	-6e-05	-1e-05	-0.00182	-0.00012
4	26595266	26595530	0	-0.013	-0.00855	-0.00745	-0.00028	-0.00818	-0.00222
4	26601744	26601964	-0.24013	-0.11552	-0.20468	-0.02274	-5e-05	-0.06751	-0.05821
4	26607321	26607468	-0.00036	-0.00017	0	0	0	0	-0.00064
4	26697767	26697881	-0.00142	-0.00329	-0.00121	-1e-05	-0.01188	-0.00068	-0.01684
4	26742490	26742590	-0.38622	-0.92612	-0.04706	-0.00709	-0.3614	-0.16544	0
4	26742600	26742759	-0.02687	-0.01189	-0.00046	-2e-05	-0.04811	-0.00462	-0.00053
4	26748089	26748280	-0.00336	-0.00876	-0.00011	0.99999	0	-0.00511	-0.04883
4	26751684	26751836	-0.00184	-0.00092	-0.01479	-0.00035	-0.00251	-0.1733	-0.79629
4	26771043	26771334	-0.00032	-0.00014	-0.00013	-0.00041	-1e-05	-0.06007	-0.0291
4	26774783	26775004	0	0	0	-0.00443	-0.00957	-0.0156	-0.47694
4	26828910	26829014	-0.00375	-0.00057	-1e-05	-0.03945	-0.00071	-0.0001	-0.01067
4	26854831	26855079	-0.00244	-6e-05	0	-0.00013	-0.00067	0	-0.00588
4	26913929	26914036	-0.02834	-0.00022	-0.05453	-0.00119	-6e-05	-0.01822	-0.00465
4	26976142	26976266	-0.00126	-0.00044	-6e-05	-0.00205	-0.00061	-0.26345	-0.44642
4	27140632	27141077	-0.11245	-0.01422	-0.05978	-0.00444	-0.02526	-0.05079	-0.01425
4	27179629	27179762	-0.00011	-3e-05	-6e-05	-0.00018	0	-0.00535	-0.00406
4	27190248	27190481	-0.00238	-0.00778	-0.00042	-4e-05	-0.00307	-0.25594	-0.71612
4	27274310	27274448	-0.00262	-0.00269	-0.0023	-0.01969	-0.0047	-6e-05	-0.00023
4	27274455	27274636	-0.0003	-0.00962	-0.0001	-0.00076	-0.02665	0	-0.00052
4	27277014	27277231	-0.14868	-0.49365	-0.00123	-0.01285	-0.07698	-0.07595	0.47802
4	27290754	27290885	-0.00168	-2e-05	-3e-05	-0.00891	-0.0012	-0.06572	-0.09666
4	27346965	27347164	-0.00176	-0.00294	-0.02831	-0.12672	-0.00194	-0.02865	-0.04108
4	27359281	27359515	-0.15885	-0.13001	-0.02753	-0.00335	-0.16061	0.6383	-3e-05
4	27440115	27440252	-0.14526	-0.16562	-0.0079	-0.00034	-0.03937	-0.56817	-0.0211
4	27514474	27514674	-0.03158	-0.01133	-0.00038	-0.85986	-0.05495	-0.00451	-0.98324
4	27553574	27553744	-0.00012	0.99999	-0.00041	-0.08094	-0.00477	-0.23066	-0.34015
4	27734243	27734455	-0.00693	-1e-05	-0.00041	-3e-05	-0.00284	-0.02089	-0.00152
4	27742985	27743135	-0.0013	-0.05523	-0.00013	-3e-05	-0.01107	-0.01694	-0.1199
4	27821205	27821349	-3e-05	-0.00083	-0.00136	-0.02117	-0.00586	-0.02264	0.39307
4	28255169	28255280	-0.15951	-0.36297	-0.03389	-0.07726	-0.01196	-0.6564	-0.14025
4	28379693	28379868	-0.23628	-0.02244	-4e-05	-0.16717	-0.01768	-0.04692	0.19735
4	28458697	28458811	-0.00934	-0.00385	-1e-05	-0.04702	-0.00248	-0.01113	-0.00052
4	28896233	28896418	-0.00011	-0.00012	-5e-05	-0.00499	-3e-05	-0.01708	-0.46896
4	28928734	28928980	-0.0003	-0.00041	0	-0.00417	-0.00016	-0.04361	0.40601
4	28950709	28950962	-0.01201	-0.0037	1	-0.00275	-0.15137	-0.1609	-0.33698
4	28956370	28956478	-0.10726	-0.16554	-0.74193	-0.0947	-3e-05	-0.02513	-0.47634
4	28983084	28983246	-0.14287	-0.24655	-0.49769	-0.02796	-3e-05	0.95376	-0.94599
4	29032605	29032766	-0.37889	-0.14315	-0.00497	-0.02527	-0.00044	-3e-05	-0.36597
4	29032786	29032941	-0.10371	-0.058	-0.07099	-0.01638	0	-0.20083	-0.13537
4	29036102	29036309	-0.02459	-0.00168	0	1	0	0	-0.00639
4	29129387	29129515	-0.14395	-0.26252	-0.01137	-0.03285	-0.00116	-0.13126	-0.00401
4	29170852	29171130	-0.00046	-0.00363	-0.00498	-0.00113	-0.00018	0	-0.06991
4	29178563	29178698	-0.03661	-0.01422	-0.07322	-0.0109	-0.0337	-0.00205	-0.09278
4	29275254	29275511	-0.00521	-0.05916	-0.0038	-0.00139	-0.00048	-0.00093	-0.17561
4	29284969	29285110	-0.13363	-0.036	-0.28258	-0.00967	-0.00029	-0.00034	-0.20627
4	29313339	29313511	-0.00021	-6e-05	1	-0.00027	0	1	-0.00268
4	29325901	29326020	-0.00024	-0.00275	-0.00189	-0.00208	0.99999	-0.24135	-0.007
4	29330257	29330473	-0.90797	-0.62824	-0.04458	-0.21133	-9e-05	-0.7056	-0.60449
4	29332591	29332733	-0.00109	-0.00961	-0.45454	-0.14375	-0.00016	-0.00126	-0.13588
4	29334740	29335032	-0.0117	-0.00034	-0.00016	-0.00368	0	-0.00171	0
4	29335041	29335232	-0.07275	-0.19591	-0.14577	-0.32024	-0.00035	-0.01357	0.26067
4	29358110	29358211	-0.00102	-0.01765	-0.0003	-0.05115	0.99999	-0.02678	-0.06274
4	29402618	29402821	0.99998	0	1	0	0	0	0
4	29407223	29407585	1	0	1	-1e-05	0	-0.00031	-3e-05
4	29632785	29632953	-0.10887	-0.06176	-2e-05	-0.00035	-1e-05	-0.00914	-0.08089
4	29827061	29827314	-0.0001	-0.00263	-7e-05	-0.01701	-0.00042	-0.00069	-0.06137
4	30100221	30100351	-0.00159	-0.17977	-0.15923	-0.03557	-0.00116	-0.08917	-0.19724
4	30613664	30613818	1	-0.03812	-0.01214	-0.00166	-0.01264	-0.59679	-0.03665
4	30768076	30768190	-0.08204	-0.05304	-0.00099	-0.00527	-0.01389	-0.00013	-0.33
4	30992647	30992884	-0.01864	-0.00555	-0.00976	-0.0279	-7e-05	-0.0007	-0.10021
4	31242280	31242446	-0.13592	-0.03904	-0.26698	-0.05341	-0.11166	-0.28983	-0.22222
4	31608519	31608775	-0.10417	-0.4028	-0.00114	-0.05803	-0.00015	-0.76714	0.83385
4	31609429	31609548	-0.01211	-0.0042	-0.0001	-6e-05	-0.00018	-0.00195	-0.05147
4	31888830	31888970	0.0982	0.89845	-0.69651	-0.29751	-0.27358	-0.20392	-0.00504
4	31989795	31989908	0.695	0.70982	0.71945	-0.01788	-4e-05	-4e-05	-0.0156
4	32489558	32489673	-0.00518	-0.01856	-2e-05	1	-0.00011	-0.03553	-0.00364
4	32785602	32785811	-0.02945	-0.01004	-0.03627	-0.00078	-0.00249	-0.05112	-0.19312
4	33148260	33148557	-0.19337	-0.10093	-0.34431	-0.11812	-9e-05	0.91603	-0.86581
4	33150957	33151170	-0.04948	-0.12807	-0.0163	-0.00738	0	-0.08972	-0.04699
4	33230999	33231176	-0.15282	-7e-05	-2e-05	-0.00061	-0.00087	-0.17529	-0.11064
4	33883018	33883401	-0.00334	-0.0009	-6e-05	0	-2e-05	-0.00024	-0.00054
4	34166600	34166830	-0.0008	-0.0352	-0.01264	-7e-05	-0.14856	-0.46191	-0.07566
4	34524306	34524512	-0.01715	-0.01412	-0.0001	-0.00055	-0.00014	-0.00886	0
4	35954741	35954890	-0.01011	-0.009	-0.00103	-0.07726	-0.00112	-0.01804	-0.03478
4	36116765	36116950	-0.64998	-0.41733	-0.08155	-0.1372	-0.04011	-0.43348	-0.0683
4	37443466	37443750	-0.09329	-0.33825	-0.00072	-0.20422	-0.01704	-0.25025	-0.48709
4	38110347	38110639	-0.18889	-0.08644	-0.00694	-0.05386	-0.015	-0.71056	-0.07447
4	38520427	38520558	-0.10524	-0.00029	-0.16919	-0.03755	-0.00213	-0.33158	-0.07574
4	39255753	39255989	-0.00863	-0.00193	-0.0685	-0.02162	0	-0.00345	-0.00089
4	40142918	40143164	-0.6747	-0.28437	-0.07293	-0.00242	-0.02736	-0.17193	-0.00609
4	40234631	40234738	-0.0001	-0.01241	-0.00105	-0.00036	-0.01286	-0.0511	-3e-05
4	40282059	40282173	-0.142	-0.15269	-0.13277	-0.83708	-0.00548	0.37938	-0.68401
4	40339444	40339640	-0.00076	-5e-05	-1e-05	-0.00033	0	0	-0.00157
4	40540699	40540828	-0.43937	-0.22127	-0.09152	-0.06979	-0.0044	-0.03178	-0.38597
4	40798439	40798599	-0.09895	-0.00138	-0.0002	-0.00075	-0.01513	-0.11876	0.45908
4	40831115	40831275	-0.01129	-0.00994	-0.00084	-0.00222	-0.00014	-0.02637	-0.30146
4	40836044	40836166	-0.00133	-0.00686	-0.0015	-0.0018	-0.00459	-0.00315	-0.08896
4	40852600	40852800	-0.0489	-0.00987	-0.00241	-0.00037	-0.00256	-0.06103	-0.21317
4	40992577	40992746	-0.16524	-0.85324	-0.72395	-0.00326	-5e-05	0.77627	-0.45746
4	41230429	41230537	-0.00329	-0.3799	-0.15339	-0.00628	-0.08962	-0.08195	-8e-05
4	41411023	41411220	-0.05983	-0.00647	-0.03483	-0.03435	-0.14772	-0.109	-0.32803
4	41411229	41411335	-0.02972	-0.04459	-0.00027	-0.00513	-0.01981	-0.00058	-0.0011
4	41665036	41665224	-0.33115	-0.15732	-0.03747	-0.0356	-0.00022	-0.72089	-0.21969
4	41676776	41676897	-0.29561	-0.09742	-0.01758	-0.47397	-0.01173	-0.30311	-0.00082
4	41692644	41692765	-0.0589	-0.13813	-0.01538	-0.00129	-0.17158	-0.63526	-0.1607
4	41695073	41695195	-0.07811	-0.01826	-0.24743	-6e-05	-0.00813	-0.80065	-0.17061
4	41833540	41833672	-0.22729	-0.0034	-0.00368	-0.13563	-0.12872	-0.28493	-4e-05
4	42242655	42242793	-0.11184	-0.19765	-0.62748	-0.3043	-0.00256	-0.08899	-0.07582
4	42273062	42273204	-0.08499	-0.16718	-0.01843	-8e-05	-0.55983	-0.5233	-0.13237
4	42285140	42285247	-0.01129	-0.03311	-0.00106	-0.00121	-0.00038	-3e-05	-0.01838
4	42399943	42400054	-0.03396	-0.00538	0	-3e-05	-0.0004	-0.19319	-0.11756
4	42831643	42831931	-0.25876	-0.09097	-0.03877	-0.08804	-0.01469	-0.41994	-0.04018
4	42970215	42970525	-0.00839	-0.00093	-3e-05	0	0	-0.00083	0
4	43397351	43397630	-0.0004	-0.02294	-0.00049	-0.04515	-0.00412	-0.01004	-0.40213
4	43689384	43689796	-0.4979	0.83711	-0.00515	-0.15957	-0.28698	-0.09813	-0.00932
4	43877265	43877418	-0.00105	-0.00843	-0.00188	-0.0231	-0.04115	-3e-05	-0.00108
4	43968410	43968564	-0.12207	-0.02969	-0.01756	-0.01819	-0.2446	-0.12601	-0.02371
4	44460322	44460430	-0.00283	-0.00103	-0.00016	-0.06972	-0.20311	0.66854	-0.0686
4	44665439	44665574	-0.00331	-0.02152	-0.01535	-0.01622	-0.00859	-0.32178	-0.0011
4	44802563	44802700	-0.44852	-0.08142	-0.56381	-0.25759	-0.01886	-0.45242	-0.03264
4	47858643	47859029	-0.46649	-0.42318	-0.0348	-0.353	-0.00763	-0.05532	-0.46895
4	49238998	49239115	-0.04611	-0.04989	-0.00635	-3e-05	-0.24302	0.78504	-0.75475
4	51740874	51741147	-0.2547	-0.23442	-0.00044	0	-0.00069	-0.02665	-0.03382
4	51752006	51752113	-0.02159	-0.19497	-2e-05	-0.00293	-0.01625	-0.04379	-0.2345
4	51811341	51811467	-0.0803	-0.00159	-0.03422	-0.00037	-0.01793	-0.12784	-0.00109
4	52195699	52195893	-0.01622	-0.00085	-0.00483	-0.0523	-0.00117	-0.6262	0.42577
4	52298079	52298331	0	-3e-05	0	-0.01419	-0.00162	-0.02255	-0.06688
4	53451617	53451791	-0.00138	-0.00803	-0.05128	-0.00676	-0.00171	-0.01419	-0.65848
4	54823728	54823916	-0.00287	-0.00032	-0.01548	-0.01752	0	-0.44939	-0.00232
4	54840711	54841042	-0.02963	-0.01888	-0.00015	-0.01815	0	-0.48575	0.54031
4	54903685	54903800	-0.00026	-0.00667	-0.00013	-0.23056	-0.00147	-0.25259	-0.03365
4	54969135	54969375	-0.01723	-0.00037	-0.00266	-0.02139	-9e-05	-0.46809	-0.03252
4	55006625	55006728	-0.00012	-1e-05	-0.00183	-0.05269	-0.01785	-0.0899	-0.00052
4	55039435	55039584	-0.00063	-0.02275	-0.00525	-0.00723	-0.01307	-8e-05	-0.20154
4	55653821	55653991	-0.00193	-0.00127	-0.0054	-0.54589	-0.21893	0.83557	0.33488
4	55707893	55708037	-0.00019	0	-0.00308	-0.62735	-0.12929	0.96053	-0.01446
4	55730565	55730712	0.99999	1	-6e-05	-0.0019	0	-0.00702	-0.22178
4	55923160	55923445	-0.02309	-0.01758	-0.0125	-0.10099	-0.30103	-0.30545	-0.03416
4	57680296	57680451	-0.42868	-0.06033	-0.33213	-0.29691	-0.01112	-0.86984	-0.01055
4	58107012	58107129	0	0	0	0	0	-0.00314	-0.00011
4	58131999	58132243	-0.0019	-0.03938	-0.34314	-0.03171	0.91494	-0.00866	-0.94455
4	59296650	59296758	-0.04044	-0.04317	-0.76467	-0.13878	-0.09888	-0.74787	-0.05218
4	59307463	59307607	-0.00222	-0.0338	-0.09805	1	-0.01222	-0.21642	-0.00052
4	59313632	59313776	-0.00222	-0.0338	-0.09805	1	-0.01222	-0.21642	-0.00052
4	59349317	59349718	-0.37343	-0.10495	-0.0076	-0.02647	-0.04174	-0.40443	-0.00065
4	59415264	59415368	-0.19259	-0.00924	-0.00055	-0.00244	-0.09695	-0.22491	-0.09775
4	61271957	61272176	-0.14319	-0.90054	-0.04497	-1e-05	-0.00408	-0.47374	-0.57015
4	62231785	62231895	-0.09635	-0.1073	-8e-05	-0.00227	-3e-05	-0.09297	-0.12687
4	62297167	62297319	-0.12354	-0.18381	-0.6213	-0.03421	0	-0.08736	-0.12188
4	63054807	63055147	-0.00457	-0.00342	-0.01566	-0.10953	-0.01021	-0.17174	-0.00125
4	63669844	63669945	-0.81282	-0.23392	-0.03146	-0.09068	-0.00023	-0.21117	-0.18145
4	63791092	63791207	-0.0035	-0.00149	-0.01409	-0.07016	-0.00101	-0.09368	0
4	64481578	64481707	-0.00779	-0.00261	-0.00181	-0.00353	-0.02766	0.16129	-0.74983
4	64795214	64795381	-0.04722	-0.01013	-0.0002	-0.28093	-0.01713	-0.04517	-0.0002
4	65098919	65099032	-0.00595	-0.00677	-0.00012	-0.03324	-0.00539	-0.32079	-0.53006
4	65510514	65510705	-0.00407	-0.00055	-0.00026	-0.00046	0	-2e-05	-0.00078
4	66045496	66045648	-0.03291	-0.07307	-2e-05	-0.05016	-0.00736	-0.00915	-0.62107
4	66258282	66258423	-0.00183	-0.00022	-0.00032	-0.01022	-0.38556	-0.31012	-0.12559
4	66574290	66574417	-0.00026	-2e-05	-1e-05	-0.00048	0	-0.01466	-0.00709
4	67105038	67105226	-0.00066	-0.01032	-0.13295	-0.28286	-0.31689	-0.03458	-0.05146
4	67527180	67527284	-0.00468	-0.00091	0	-0.24431	-0.00093	-0.12417	-0.20649
4	67572419	67572564	-0.00038	-0.00388	-0.00513	-0.01808	-0.00098	-0.27269	-1e-05
4	67955621	67955747	-0.08636	-0.00968	-0.01321	-0.07756	-2e-05	-0.09077	-0.74396
4	68104119	68104275	-0.15429	-0.23022	-0.22064	-0.47086	-0.07819	-0.04445	-0.42585
4	68104919	68105079	-0.40597	-0.72215	-0.00317	-0.62906	-0.23155	-0.03014	-0.43486
4	68221904	68222004	-0.02287	-0.05806	0.85192	-0.04531	-0.00275	-0.64379	-0.29846
4	68599337	68599498	0.52273	-0.07509	-0.01959	-0.02297	-0.02771	0.44336	0.02799
4	68696563	68696730	-0.04099	-0.37896	-0.02377	-0.0579	-0.01883	-0.00026	-5e-05
4	68857102	68857244	-0.30673	-0.00128	0.43058	-0.00572	-0.06388	-0.84379	-0.00292
[truncated: 1,610 more rows]
