# Supplementary material for: Positive selection in noncoding genomic regions of vocal learning birds is associated with genes implicated in vocal learning and speech functions in humans
Source: HighWire-hosted journal article supplement (doi:10.1101/gr.275989.121), 2021-10-19
Supplement: Supplemental_Table_S7.xlsx [file Supplemental_Table_S7.xlsx]

## Sheet: Sheet1
Supplemental Table S7: Genes enriched for AR association across more than one vocal learning lineage. Hypergeometric test p-values for each vocal learning lineage.
Gene	Chromosome	Start	End	Strand	Oscines	Parrots	Hummingbird
NDST3	4	55377747	55489121	-	0.0106979	<1.00E-16	0.0147064
MAT2B	13	6704768	6715540	-	0.0773069	<1.00E-16	<1.00E-16
NR2F1	Z	58374141	58383484	-	<1.00E-16	<1.00E-16	0.953666
ARRDC3	Z	59332514	59346072	+	<1.00E-16	<1.00E-16	0.958753
TENM2	13	4819802	5442558	-	0.215544	1.51479e-12	1.44329e-15
TPCN2	5	17116917	17139354	+	6.55228e-06	2.24737e-09	0.441687
CCND1	5	17526264	17539488	+	1.91175e-05	7.94196e-09	0.491388
PCDH10	4	27094884	27133196	+	<1.00E-16	0.0717353	7.98546e-05
ANKRD32	Z	57807565	57848705	-	<1.00E-16	0.000279419	1
FAM172A	Z	58092017	58355900	+	<1.00E-16	0.000460056	1
CBR4	4	25755958	25763029	+	<1.00E-16	0.283032	0.00095188
ABI3BP	1	84984069	85117219	-	0.000710321	0.001033	1
BRINP1	17	4502517	4580970	-	0.00186653	0.000503114	0.855368
DNAH7	7	9682846	9797359	-	0.0039088	1	0.00142101
NDST4	4	56456769	56569952	+	0.00594918	<1.00E-16	0.0701154
CDK5RAP2	17	5032684	5106426	-	0.000377609	0.00699223	0.928859
METTL22	14	10160754	10192916	-	0.711181	0.0073733	9.05387e-13
FLRT2	5	42172881	42235676	+	0.00748515	0.00240379	1
MCTP1	Z	57530563	57796560	+	<1.00E-16	0.00770395	1
SYT1	1	39108395	39454261	+	0.0100199	0.781318	5.47441e-09
LOC107054266	11	4278280	4280481	-	0.780838	0.000143384	0.0103588
AP5M1	5	55699098	55709323	-	0.677578	1.45468e-06	0.0109033
LOC101747537	4	71002392	71011893	+	0.0110832	0.000872877	1
PCDH17	1	163442841	163529605	-	0.01295	1.75795e-06	0.920667
NAV3	1	38395636	38924294	+	0.0135349	0.962582	0.00025004
SPATA17	3	19676487	19766954	-	0.810272	0.00966546	0.0151972
LOC768391	8	37519	44695	-	1	0.0155709	7.67521e-09
ACYP1	5	38195151	38196110	-	0.0165052	1	0.00722965
KIF23	10	19360358	19378167	+	0.0165052	1	0.0162662
KIAA0825	Z	57848729	58078152	+	<1.00E-16	0.0171046	1
KIF2A	Z	19421116	19478368	+	0.00547897	1	0.0174344
AMY2A	8	46119	407031	-	0.662667	0.0175083	7.23352e-06
LPHN2	8	17456472	17605244	-	0.0101724	0.500285	0.0183927
TRDN	3	60991949	61132154	+	0.0192046	0.00184966	1
CETN3	Z	59736140	59752762	+	<1.00E-16	0.0198588	1
SALL1	11	6046344	6061077	+	0.2406	<1.00E-16	0.020533
PSAT1	Z	37963261	37978946	+	0.411913	0.0128611	0.0206308
TDRD15	3	102733739	102742985	+	0.176585	3.0187e-13	0.0207113
ZNF608	Z	79623730	79721327	+	0.0207958	1.60049e-05	0.871855
ADGRL4	8	18585545	18660941	+	0.00644491	0.280879	0.0215942
SVIP	5	3016779	3020197	-	0.0217259	0.0151939	1
TIMD4	13	11469602	11484197	+	0.780152	0.0218406	0.00912741
ACVR2A	7	34687035	34744468	+	0.77553	1.24067e-12	0.0224857
EFNA5	Z	48046710	48253798	+	0.0241872	0.685129	<1.00E-16
ZSWIM6	Z	19094888	19206550	+	0.00127437	1	0.025149
SGCD	13	11476928	11831875	-	0.931471	0.0261957	2.20182e-05
FIGN	7	20583699	20684258	+	0.0225506	0.0261957	0.19708
RPL7L1	4	54895202	54898868	-	0.0165052	0.0271072	1
LOC107051640	1	163980536	163981752	+	0.0274673	0.0148378	1
IL17REL	1	20028245	20070797	-	0.000377609	0.027837	1
DTHD1	4	70625209	70638449	-	0.00933854	0.0293788	1
TMEM161B	Z	60592899	60637640	+	0.000104251	1	0.0294355
GAS2	5	2923400	3016229	+	0.00357187	0.0300595	1
MMP16	2	124196143	124391614	-	0.0304786	0.0142865	1
AGA	4	42504432	42516362	+	0.00947217	0.0305263	1
TFEC	1	25289184	25351175	+	6.75228e-10	0.03163	0.901345
TLE3	10	19499967	19520754	-	0.032738	1	0.00542593
MEF2C	Z	60303678	60440726	+	<1.00E-16	0.0327223	1
PRKACB	8	16708780	16776230	-	0.0338818	0.959955	0.00151843
BCHE	9	21043977	21090156	+	1	0.0339309	0.0192092
SH3GL3	10	11407257	11450991	+	0.0213938	1	0.0355644
IMPG2	1	85204682	85257589	-	0.000350285	0.0358986	1
DRGX	6	18690666	18707361	-	0.0264093	0.44617	0.0371671
FBXO6	21	5659995	5667607	-	0.0213938	0.0376383	0.31928
NARS2	1	192670661	192723417	+	0.0388367	0.002741	0.423934
KHDRBS2	3	86406227	86748750	+	0.00452877	0.0389088	0.494488
FANCF	5	2902160	2904877	-	0.00415093	0.0389683	1
HABP4	Z	42179846	42201841	+	0.00159836	0.040384	1
CAPSL	Z	10904842	10925919	-	0.032738	0.040384	1
IRX6	11	3977097	3980535	-	0.907509	0.000164726	0.0406227
LOC107053385	5	11270939	11273267	-	0.772583	0.0123482	0.0411277
TWIST1	2	29649392	29651300	-	0.0307776	0.0424629	1
SLIT2	4	75487239	75767455	-	0.00442108	0.0429732	1
NEK10	2	38501592	38575922	-	0.0137847	0.0431021	1
RNF217	3	60313595	60376646	-	0.00797394	0.0437158	1
LOC100857117	4	28172128	28173788	-	1.83396e-05	0.0444042	0.0591798
LOC101748831	1	192448590	192602478	+	0.015217	0.0446239	0.867115
ZIC4	9	11914803	11933671	-	0.0462945	0.000697787	1
WNT16	1	23245771	23256298	-	0.0464784	1	0.01195
C8ORF88	2	125261733	125269199	-	0.048703	1	0.0215326
NOL7	2	60720088	60723535	+	0.048703	1	0.0215326
TOX3	11	5324989	5446431	+	0.179376	<1.00E-16	0.0494669
