# Supplementary material for: Positive selection in noncoding genomic regions of vocal learning birds is associated with genes implicated in vocal learning and speech functions in humans
Source: HighWire-hosted journal article supplement (doi:10.1101/gr.275989.121), 2021-10-19
Supplement: Supplemental_Table_S8.xlsx [file Supplemental_Table_S8.xlsx]

## Sheet: Sheet2
Supplemental Table S8: Tests for AR convergence between non-vocal learners. We provide the number of convergent and per species ARs, the number of shared CEs after filtering, and hypergeometric tests for enrichment of convergence.
Species 1	Species 2	Convergent ARs	Species 1 ARs	Species 2 ARs	Shared ECE	hypergeometric p	Log hypergeometric p (max = 10)
AmericanFlamingo	RedLeggedSerima	5	856	374	253351	0.00187143	2.72783
AmericanFlamingo	Killdeer	3	818	376	252975	0.0347821	1.45864
AmericanFlamingo	ChuckWillsWidow	5	1670	375	255156	0.038392	1.41576
AmericanFlamingo	GoldenEagle	1	345	375	255053	0.0921967	1.03528
AmericanFlamingo	CommonCuckoo	8	3886	371	252846	0.121751	0.914527
AmericanFlamingo	GoldenCollaredManakin	2	824	383	254948	0.128424	0.891353
AmericanFlamingo	BlueCrownedManakin	1	524	379	255753	0.18265	0.738381
AmericanFlamingo	RockDove	3	1724	376	248766	0.264885	0.576942
AmericanFlamingo	Mallard	4	2443	356	241319	0.293876	0.531836
AmericanFlamingo	CrestedIbis	1	758	371	250635	0.309125	0.509866
AmericanFlamingo	ChimneySwift	5	3248	376	251493	0.358601	0.445389
AmericanFlamingo	Ostrich	6	4310	379	253795	0.464054	0.333431
AmericanFlamingo	Rifleman	5	4639	369	248636	0.686854	0.163135
AmericanFlamingo	GreaterPrairieChicken	3	3309	381	252670	0.735574	0.133374
AmericanFlamingo	EmperorPenguin	0	991	376	254519	0.769601	0.113734
AmericanFlamingo	PeregrineFalcon	0	1191	374	253859	0.827968	0.0819863
AmericanFlamingo	DownyWoodpecker	5	6175	356	228431	0.920275	0.0360825
AmericanFlamingo	WhiteThroatedTinamous	4	6068	345	226666	0.954675	0.0201446
AmericanFlamingo	Chicken	0	2723	364	242437	0.983668	0.00715166
BlueCrownedManakin	GoldenCollaredManakin	105	778	512	271829	0	10
BlueCrownedManakin	Rifleman	74	4934	516	264856	0	10
BlueCrownedManakin	EmperorPenguin	8	1042	543	270528	0.000308654	3.51053
BlueCrownedManakin	RedLeggedSerima	5	891	543	269376	0.0100562	1.99756
BlueCrownedManakin	GoldenEagle	2	358	534	271353	0.0344317	1.46304
BlueCrownedManakin	RockDove	7	1854	530	264726	0.0350986	1.45471
BlueCrownedManakin	Chicken	9	2824	521	257945	0.0637904	1.19524
BlueCrownedManakin	PeregrineFalcon	4	1245	534	270008	0.103174	0.986431
BlueCrownedManakin	DownyWoodpecker	17	6498	495	242945	0.119955	0.920982
BlueCrownedManakin	ChimneySwift	9	3470	517	267201	0.140131	0.853466
BlueCrownedManakin	AmericanFlamingo	1	379	524	255753	0.18265	0.738381
BlueCrownedManakin	GreaterPrairieChicken	7	3441	531	269123	0.369696	0.432156
BlueCrownedManakin	Ostrich	9	4584	547	270201	0.44977	0.34701
BlueCrownedManakin	CrestedIbis	1	795	534	265986	0.474278	0.323967
BlueCrownedManakin	Killdeer	0	865	544	268719	0.827218	0.08238
BlueCrownedManakin	WhiteThroatedTinamous	9	6506	501	239935	0.873137	0.0589177
BlueCrownedManakin	ChuckWillsWidow	1	1800	543	271536	0.875368	0.0578094
BlueCrownedManakin	CommonCuckoo	4	4093	535	269290	0.909562	0.0411677
BlueCrownedManakin	Mallard	0	2567	518	256520	0.994566	0.00236651
Chicken	GreaterPrairieChicken	381	3166	2722	255221	0	10
Chicken	Mallard	52	2452	2720	244185	6.61557e-06	5.17943
Chicken	BlueCrownedManakin	9	521	2824	257945	0.0637904	1.19524
Chicken	EmperorPenguin	13	997	2810	256445	0.21036	0.677036
Chicken	CrestedIbis	9	749	2780	252644	0.3131	0.504317
Chicken	GoldenEagle	4	341	2820	257276	0.319751	0.495188
Chicken	ChuckWillsWidow	19	1734	2807	257291	0.431817	0.364701
Chicken	Rifleman	53	4807	2789	250937	0.487235	0.312261
Chicken	ChimneySwift	34	3351	2809	253403	0.66202	0.179129
Chicken	CommonCuckoo	35	3953	2796	255353	0.887165	0.0519955
Chicken	GoldenCollaredManakin	4	833	2817	257142	0.950268	0.0221537
Chicken	Killdeer	3	817	2802	254683	0.97924	0.00911076
Chicken	AmericanFlamingo	0	364	2723	242437	0.983668	0.00715166
Chicken	RedLeggedSerima	3	859	2803	255368	0.984872	0.00662021
Chicken	RockDove	10	1777	2766	250914	0.987149	0.00561747
Chicken	DownyWoodpecker	52	6249	2662	230553	0.992985	0.00305729
Chicken	WhiteThroatedTinamous	50	6187	2586	228714	0.993282	0.00292753
Chicken	PeregrineFalcon	3	1208	2814	256084	0.999207	0.000344484
Chicken	Ostrich	22	4392	2811	255977	0.999984	6.83768e-06
ChimneySwift	EmperorPenguin	23	1031	3455	265395	0.00538719	2.26864
ChimneySwift	DownyWoodpecker	104	6442	3162	239230	0.0185084	1.73263
ChimneySwift	ChuckWillsWidow	31	1774	3467	266475	0.0436531	1.35999
ChimneySwift	BlueCrownedManakin	9	517	3470	267201	0.140131	0.853466
ChimneySwift	Rifleman	72	4845	3441	260121	0.143379	0.843514
ChimneySwift	RockDove	28	1840	3415	259908	0.185066	0.732674
ChimneySwift	RedLeggedSerima	14	888	3450	264331	0.19054	0.720015
ChimneySwift	Killdeer	13	850	3452	263818	0.22867	0.640791
ChimneySwift	AmericanFlamingo	5	376	3248	251493	0.358601	0.445389
ChimneySwift	GoldenCollaredManakin	11	843	3474	266440	0.419709	0.377052
ChimneySwift	CommonCuckoo	53	4064	3451	264313	0.466965	0.330715
ChimneySwift	GoldenEagle	4	356	3471	266310	0.495107	0.305301
ChimneySwift	Chicken	34	2809	3351	253403	0.66202	0.179129
ChimneySwift	GreaterPrairieChicken	39	3422	3457	264141	0.785796	0.10469
ChimneySwift	CrestedIbis	7	787	3445	261251	0.814103	0.0893207
ChimneySwift	PeregrineFalcon	12	1245	3465	265070	0.826772	0.0826142
ChimneySwift	Mallard	23	2534	3353	252070	0.967871	0.0141825
ChimneySwift	Ostrich	33	4518	3467	265036	0.99987	5.64153e-05
ChimneySwift	WhiteThroatedTinamous	49	6430	3207	236052	0.999996	1.6782e-06
ChuckWillsWidow	RockDove	21	1851	1782	263931	0.00892426	2.04943
ChuckWillsWidow	EmperorPenguin	12	1040	1782	269736	0.0231075	1.63625
ChuckWillsWidow	AmericanFlamingo	5	375	1670	255156	0.038392	1.41576
ChuckWillsWidow	PeregrineFalcon	13	1249	1783	269389	0.0418319	1.37849
ChuckWillsWidow	ChimneySwift	31	3467	1774	266475	0.0436531	1.35999
ChuckWillsWidow	GoldenCollaredManakin	9	870	1794	270682	0.0677937	1.16881
ChuckWillsWidow	CommonCuckoo	32	4092	1782	268527	0.150041	0.823791
ChuckWillsWidow	Killdeer	7	859	1778	268016	0.214827	0.667912
ChuckWillsWidow	GreaterPrairieChicken	24	3432	1786	268352	0.35197	0.453494
ChuckWillsWidow	Chicken	19	2807	1734	257291	0.431817	0.364701
ChuckWillsWidow	CrestedIbis	4	797	1773	265520	0.615119	0.211041
ChuckWillsWidow	DownyWoodpecker	42	6503	1664	242365	0.620024	0.207592
ChuckWillsWidow	GoldenEagle	1	361	1794	270639	0.691243	0.160369
ChuckWillsWidow	Rifleman	28	4972	1781	264138	0.80876	0.0921806
ChuckWillsWidow	Mallard	13	2560	1736	256029	0.82393	0.0841098
ChuckWillsWidow	BlueCrownedManakin	1	543	1800	271536	0.875368	0.0578094
ChuckWillsWidow	RedLeggedSerima	2	893	1779	268700	0.934923	0.0292243
ChuckWillsWidow	Ostrich	21	4570	1794	269350	0.955281	0.0198689
ChuckWillsWidow	WhiteThroatedTinamous	21	6508	1670	239735	0.999965	1.51531e-05
CommonCuckoo	RockDove	41	1842	3987	262063	0.00748165	2.126
CommonCuckoo	AmericanFlamingo	8	371	3886	252846	0.121751	0.914527
CommonCuckoo	ChuckWillsWidow	32	1782	4092	268527	0.150041	0.823791
CommonCuckoo	GoldenEagle	6	359	4082	268330	0.307188	0.512595
CommonCuckoo	GreaterPrairieChicken	54	3412	4058	266258	0.355434	0.44924
CommonCuckoo	RedLeggedSerima	14	888	4065	266270	0.382237	0.417667
CommonCuckoo	Killdeer	13	859	4041	265875	0.433145	0.363366
CommonCuckoo	ChimneySwift	53	3451	4064	264313	0.466965	0.330715
CommonCuckoo	EmperorPenguin	13	1034	4071	267501	0.705726	0.151364
CommonCuckoo	GoldenCollaredManakin	9	849	4094	268512	0.832955	0.0793787
CommonCuckoo	DownyWoodpecker	92	6474	3817	240562	0.848987	0.0710989
CommonCuckoo	Chicken	35	2796	3953	255353	0.887165	0.0519955
CommonCuckoo	BlueCrownedManakin	4	535	4093	269290	0.909562	0.0411677
CommonCuckoo	PeregrineFalcon	12	1239	4068	267104	0.937842	0.0278705
CommonCuckoo	Mallard	29	2536	3983	253721	0.956098	0.0194975
CommonCuckoo	CrestedIbis	6	791	4013	263436	0.956791	0.0191828
CommonCuckoo	Ostrich	55	4544	4080	267093	0.958849	0.0182499
CommonCuckoo	Rifleman	50	4929	4044	262131	0.999183	0.000354971
CommonCuckoo	WhiteThroatedTinamous	58	6485	3820	237730	1	1.53955e-07
CrestedIbis	Killdeer	34	841	785	262705	0	10
CrestedIbis	Rifleman	41	4926	784	258901	4.10025e-09	8.38719
CrestedIbis	GoldenEagle	4	355	789	265363	0.00447036	2.34966
CrestedIbis	Mallard	15	2540	777	251255	0.00663309	2.17828
CrestedIbis	RedLeggedSerima	6	881	790	263396	0.0182009	1.73991
CrestedIbis	WhiteThroatedTinamous	25	6415	741	235415	0.117495	0.929982
CrestedIbis	EmperorPenguin	4	1018	783	264584	0.186294	0.729802
CrestedIbis	Ostrich	15	4524	789	263815	0.283629	0.54725
CrestedIbis	AmericanFlamingo	1	371	758	250635	0.309125	0.509866
CrestedIbis	Chicken	9	2780	749	252644	0.3131	0.504317
CrestedIbis	DownyWoodpecker	21	6426	777	237545	0.443994	0.352623
CrestedIbis	GoldenCollaredManakin	2	843	792	265178	0.461144	0.336164
CrestedIbis	BlueCrownedManakin	1	534	795	265986	0.474278	0.323967
CrestedIbis	GreaterPrairieChicken	9	3395	783	263047	0.55632	0.254675
CrestedIbis	ChuckWillsWidow	4	1773	797	265520	0.615119	0.211041
CrestedIbis	RockDove	4	1811	781	259093	0.637212	0.195716
CrestedIbis	PeregrineFalcon	2	1234	791	264212	0.714714	0.145868
CrestedIbis	ChimneySwift	7	3445	787	261251	0.814103	0.0893207
CrestedIbis	CommonCuckoo	6	4013	791	263436	0.956791	0.0191828
DownyWoodpecker	Rifleman	226	4559	6397	236825	0	10
DownyWoodpecker	ChimneySwift	104	3162	6442	239230	0.0185084	1.73263
DownyWoodpecker	BlueCrownedManakin	17	495	6498	242945	0.119955	0.920982
DownyWoodpecker	GoldenCollaredManakin	23	792	6483	242340	0.296111	0.528545
DownyWoodpecker	CrestedIbis	21	777	6426	237545	0.443994	0.352623
DownyWoodpecker	Killdeer	22	830	6466	239998	0.474713	0.323569
DownyWoodpecker	ChuckWillsWidow	42	1664	6503	242365	0.620024	0.207592
DownyWoodpecker	GoldenEagle	6	332	6492	241746	0.789334	0.102739
DownyWoodpecker	CommonCuckoo	92	3817	6474	240562	0.848987	0.0710989
DownyWoodpecker	RedLeggedSerima	17	851	6434	240210	0.872414	0.0592772
DownyWoodpecker	AmericanFlamingo	5	356	6175	228431	0.920275	0.0360825
DownyWoodpecker	EmperorPenguin	18	968	6469	241156	0.937499	0.0280291
DownyWoodpecker	PeregrineFalcon	21	1173	6484	240667	0.971649	0.0124904
DownyWoodpecker	Chicken	52	2662	6249	230553	0.992985	0.00305729
DownyWoodpecker	RockDove	29	1715	6422	236645	0.996486	0.00152884
DownyWoodpecker	Mallard	44	2429	6312	228816	0.99846	0.00066954
DownyWoodpecker	GreaterPrairieChicken	55	3232	6450	240490	0.999861	6.05878e-05
DownyWoodpecker	Ostrich	58	4279	6459	240718	1	7.86937e-10
DownyWoodpecker	WhiteThroatedTinamous	89	6118	6045	214663	1	2.58874e-13
EmperorPenguin	BlueCrownedManakin	8	543	1042	270528	0.000308654	3.51053
EmperorPenguin	ChimneySwift	23	3455	1031	265395	0.00538719	2.26864
EmperorPenguin	Ostrich	26	4551	1035	268361	0.0204396	1.68953
EmperorPenguin	ChuckWillsWidow	12	1782	1040	269736	0.0231075	1.63625
EmperorPenguin	RedLeggedSerima	5	879	1032	267705	0.127287	0.895214
EmperorPenguin	GoldenEagle	2	358	1033	269637	0.159275	0.797853
EmperorPenguin	CrestedIbis	4	783	1018	264584	0.186294	0.729802
EmperorPenguin	Chicken	13	2810	997	256445	0.21036	0.677036
EmperorPenguin	GoldenCollaredManakin	4	865	1040	269656	0.243581	0.613357
EmperorPenguin	Mallard	10	2552	1000	254931	0.418286	0.378527
EmperorPenguin	PeregrineFalcon	4	1233	1036	268331	0.517116	0.286412
EmperorPenguin	CommonCuckoo	13	4071	1034	267501	0.705726	0.151364
EmperorPenguin	Rifleman	16	4958	1030	262933	0.742304	0.129418
EmperorPenguin	AmericanFlamingo	0	376	991	254519	0.769601	0.113734
EmperorPenguin	DownyWoodpecker	18	6469	968	241156	0.937499	0.0280291
EmperorPenguin	Killdeer	0	853	1034	266927	0.963702	0.0160571
EmperorPenguin	RockDove	2	1844	1009	262837	0.972657	0.0120402
EmperorPenguin	WhiteThroatedTinamous	13	6485	952	238473	0.99635	0.00158808
EmperorPenguin	GreaterPrairieChicken	3	3416	1029	267268	0.999129	0.00037842
GoldenCollaredManakin	BlueCrownedManakin	105	512	778	271829	0	10
GoldenCollaredManakin	Rifleman	97	4926	827	264196	0	10
GoldenCollaredManakin	ChuckWillsWidow	9	1794	870	270682	0.0677937	1.16881
GoldenCollaredManakin	RockDove	9	1854	852	264013	0.0817055	1.08775
GoldenCollaredManakin	PeregrineFalcon	6	1244	862	269153	0.108204	0.965755
GoldenCollaredManakin	AmericanFlamingo	2	383	824	254948	0.128424	0.891353
GoldenCollaredManakin	RedLeggedSerima	4	898	868	268509	0.168111	0.774405
GoldenCollaredManakin	EmperorPenguin	4	1040	865	269656	0.243581	0.613357
GoldenCollaredManakin	DownyWoodpecker	23	6483	792	242340	0.296111	0.528545
GoldenCollaredManakin	GoldenEagle	1	362	858	270464	0.318763	0.496532
GoldenCollaredManakin	ChimneySwift	11	3474	843	266440	0.419709	0.377052
GoldenCollaredManakin	CrestedIbis	2	792	843	265178	0.461144	0.336164
GoldenCollaredManakin	WhiteThroatedTinamous	20	6512	754	239358	0.48711	0.312373
GoldenCollaredManakin	Killdeer	1	864	864	267878	0.767638	0.114843
GoldenCollaredManakin	CommonCuckoo	9	4094	849	268512	0.832955	0.0793787
GoldenCollaredManakin	Mallard	4	2563	820	255687	0.913701	0.0391957
GoldenCollaredManakin	Chicken	4	2817	833	257142	0.950268	0.0221537
GoldenCollaredManakin	GreaterPrairieChicken	5	3439	857	268317	0.963201	0.016283
GoldenCollaredManakin	Ostrich	7	4575	877	269333	0.981768	0.00799107
GoldenEagle	PeregrineFalcon	9	1243	357	269439	8.157e-06	5.08847
GoldenEagle	CrestedIbis	4	789	355	265363	0.00447036	2.34966
GoldenEagle	RedLeggedSerima	4	889	358	268611	0.00719503	2.14297
GoldenEagle	BlueCrownedManakin	2	534	358	271353	0.0344317	1.46304
GoldenEagle	AmericanFlamingo	1	375	345	255053	0.0921967	1.03528
GoldenEagle	Rifleman	9	4986	358	263803	0.144462	0.840248
GoldenEagle	EmperorPenguin	2	1033	358	269637	0.159275	0.797853
GoldenEagle	WhiteThroatedTinamous	11	6477	334	239424	0.197661	0.70408
GoldenEagle	Ostrich	7	4561	358	269203	0.263872	0.578607
GoldenEagle	CommonCuckoo	6	4082	359	268330	0.307188	0.512595
GoldenEagle	Killdeer	1	852	358	267794	0.315335	0.501229
GoldenEagle	GoldenCollaredManakin	1	858	362	270464	0.318763	0.496532
GoldenEagle	Chicken	4	2820	341	257276	0.319751	0.495188
GoldenEagle	RockDove	2	1857	349	263566	0.446109	0.350559
GoldenEagle	ChimneySwift	4	3471	356	266310	0.495107	0.305301
GoldenEagle	GreaterPrairieChicken	3	3427	355	268083	0.665908	0.176586
GoldenEagle	ChuckWillsWidow	1	1794	361	270639	0.691243	0.160369
GoldenEagle	DownyWoodpecker	6	6492	332	241746	0.789334	0.102739
GoldenEagle	Mallard	0	2555	351	255909	0.970531	0.0129905
GreaterPrairieChicken	Chicken	381	2722	3166	255221	0	10
GreaterPrairieChicken	Mallard	66	2541	3317	253575	1.15826e-07	6.9362
GreaterPrairieChicken	Rifleman	74	4912	3383	262043	0.0812594	1.09013
GreaterPrairieChicken	ChuckWillsWidow	24	1786	3432	268352	0.35197	0.453494
GreaterPrairieChicken	CommonCuckoo	54	4058	3412	266258	0.355434	0.44924
GreaterPrairieChicken	BlueCrownedManakin	7	531	3441	269123	0.369696	0.432156
GreaterPrairieChicken	CrestedIbis	9	783	3395	263047	0.55632	0.254675
GreaterPrairieChicken	GoldenEagle	3	355	3427	268083	0.665908	0.176586
GreaterPrairieChicken	AmericanFlamingo	3	381	3309	252670	0.735574	0.133374
GreaterPrairieChicken	ChimneySwift	39	3457	3422	264141	0.785796	0.10469
GreaterPrairieChicken	PeregrineFalcon	12	1239	3426	266819	0.803111	0.0952242
GreaterPrairieChicken	RockDove	17	1845	3375	261823	0.908176	0.0418301
GreaterPrairieChicken	WhiteThroatedTinamous	70	6489	3161	237360	0.96296	0.0163919
GreaterPrairieChicken	GoldenCollaredManakin	5	857	3439	268317	0.963201	0.016283
GreaterPrairieChicken	RedLeggedSerima	5	884	3409	266142	0.970067	0.0131981
GreaterPrairieChicken	Killdeer	4	854	3408	265532	0.985069	0.0065333
GreaterPrairieChicken	Ostrich	36	4563	3418	266927	0.999039	0.000417618
GreaterPrairieChicken	EmperorPenguin	3	1029	3416	267268	0.999129	0.00037842
GreaterPrairieChicken	DownyWoodpecker	55	6450	3232	240490	0.999861	6.05878e-05
Killdeer	CrestedIbis	34	785	841	262705	0	10
Killdeer	Rifleman	25	4918	849	261400	0.0119839	1.9214
Killdeer	AmericanFlamingo	3	376	818	252975	0.0347821	1.45864
Killdeer	Mallard	13	2550	817	253251	0.0402955	1.39474
Killdeer	PeregrineFalcon	6	1243	857	266551	0.109478	0.960672
Killdeer	ChuckWillsWidow	7	1778	859	268016	0.214827	0.667912
Killdeer	ChimneySwift	13	3452	850	263818	0.22867	0.640791
Killdeer	Ostrich	16	4505	849	266628	0.273106	0.563669
Killdeer	GoldenEagle	1	358	852	267794	0.315335	0.501229
Killdeer	CommonCuckoo	13	4041	859	265875	0.433145	0.363366
Killdeer	DownyWoodpecker	22	6466	830	239998	0.474713	0.323569
Killdeer	RockDove	5	1820	846	261506	0.536891	0.270114
Killdeer	GoldenCollaredManakin	1	864	864	267878	0.767638	0.114843
Killdeer	RedLeggedSerima	1	882	858	265895	0.77765	0.109216
Killdeer	WhiteThroatedTinamous	17	6427	787	237515	0.795431	0.0993976
Killdeer	BlueCrownedManakin	0	544	865	268719	0.827218	0.08238
Killdeer	EmperorPenguin	0	1034	853	266927	0.963702	0.0160571
Killdeer	Chicken	3	2802	817	254683	0.97924	0.00911076
Killdeer	GreaterPrairieChicken	4	3408	854	265532	0.985069	0.0065333
Mallard	GreaterPrairieChicken	66	3317	2541	253575	1.15826e-07	6.9362
Mallard	Chicken	52	2720	2452	244185	6.61557e-06	5.17943
Mallard	CrestedIbis	15	777	2540	251255	0.00663309	2.17828
Mallard	Killdeer	13	817	2550	253251	0.0402955	1.39474
Mallard	AmericanFlamingo	4	356	2443	241319	0.293876	0.531836
Mallard	EmperorPenguin	10	1000	2552	254931	0.418286	0.378527
Mallard	RedLeggedSerima	7	864	2551	254010	0.638373	0.194926
Mallard	RockDove	16	1792	2543	249413	0.650244	0.186924
Mallard	PeregrineFalcon	9	1217	2547	254645	0.774332	0.111073
Mallard	Ostrich	37	4335	2543	254565	0.813218	0.0897929
Mallard	ChuckWillsWidow	13	1736	2560	256029	0.82393	0.0841098
Mallard	GoldenCollaredManakin	4	820	2563	255687	0.913701	0.0391957
Mallard	CommonCuckoo	29	3983	2536	253721	0.956098	0.0194975
Mallard	Rifleman	37	4828	2541	249457	0.958968	0.0181958
Mallard	ChimneySwift	23	3353	2534	252070	0.967871	0.0141825
Mallard	GoldenEagle	0	351	2555	255909	0.970531	0.0129905
Mallard	BlueCrownedManakin	0	518	2567	256520	0.994566	0.00236651
Mallard	WhiteThroatedTinamous	43	6131	2398	229149	0.997158	0.00123612
Mallard	DownyWoodpecker	44	6312	2429	228816	0.99846	0.00066954
Ostrich	WhiteThroatedTinamous	415	6209	3911	238710	0	10
Ostrich	EmperorPenguin	26	1035	4551	268361	0.0204396	1.68953
Ostrich	GoldenEagle	7	358	4561	269203	0.263872	0.578607
Ostrich	Killdeer	16	849	4505	266628	0.273106	0.563669
Ostrich	CrestedIbis	15	789	4524	263815	0.283629	0.54725
Ostrich	BlueCrownedManakin	9	547	4584	270201	0.44977	0.34701
Ostrich	AmericanFlamingo	6	379	4310	253795	0.464054	0.333431
Ostrich	Mallard	37	2543	4335	254565	0.813218	0.0897929
Ostrich	RedLeggedSerima	11	885	4545	267224	0.821395	0.0854478
Ostrich	ChuckWillsWidow	21	1794	4570	269350	0.955281	0.0198689
Ostrich	CommonCuckoo	55	4080	4544	267093	0.958849	0.0182499
Ostrich	PeregrineFalcon	13	1243	4546	267858	0.959989	0.0177336
Ostrich	RockDove	21	1844	4476	262531	0.969306	0.0135389
Ostrich	GoldenCollaredManakin	7	877	4575	269333	0.981768	0.00799107
Ostrich	GreaterPrairieChicken	36	3418	4563	266927	0.999039	0.000417618
Ostrich	ChimneySwift	33	3467	4518	265036	0.99987	5.64153e-05
Ostrich	Chicken	22	2811	4392	255977	0.999984	6.83768e-06
Ostrich	Rifleman	39	4974	4502	262603	1	4.46249e-09
Ostrich	DownyWoodpecker	58	6459	4279	240718	1	7.86937e-10
PeregrineFalcon	GoldenEagle	9	357	1243	269439	8.157e-06	5.08847
PeregrineFalcon	ChuckWillsWidow	13	1783	1249	269389	0.0418319	1.37849
PeregrineFalcon	RedLeggedSerima	7	881	1241	267251	0.0560016	1.2518
PeregrineFalcon	BlueCrownedManakin	4	534	1245	270008	0.103174	0.986431
PeregrineFalcon	GoldenCollaredManakin	6	862	1244	269153	0.108204	0.965755
PeregrineFalcon	Killdeer	6	857	1243	266551	0.109478	0.960672
PeregrineFalcon	RockDove	10	1841	1225	262409	0.246205	0.608702
PeregrineFalcon	EmperorPenguin	4	1036	1233	268331	0.517116	0.286412
PeregrineFalcon	CrestedIbis	2	791	1234	264212	0.714714	0.145868
PeregrineFalcon	Mallard	9	2547	1217	254645	0.774332	0.111073
PeregrineFalcon	GreaterPrairieChicken	12	3426	1239	266819	0.803111	0.0952242
PeregrineFalcon	ChimneySwift	12	3465	1245	265070	0.826772	0.0826142
PeregrineFalcon	AmericanFlamingo	0	374	1191	253859	0.827968	0.0819863
PeregrineFalcon	Rifleman	18	4946	1231	262545	0.837991	0.0767607
PeregrineFalcon	CommonCuckoo	12	4068	1239	267104	0.937842	0.0278705
PeregrineFalcon	Ostrich	13	4546	1243	267858	0.959989	0.0177336
PeregrineFalcon	DownyWoodpecker	21	6484	1173	240667	0.971649	0.0124904
PeregrineFalcon	Chicken	3	2814	1208	256084	0.999207	0.000344484
PeregrineFalcon	WhiteThroatedTinamous	14	6470	1176	238361	0.999741	0.000112694
RedLeggedSerima	AmericanFlamingo	5	374	856	253351	0.00187143	2.72783
RedLeggedSerima	GoldenEagle	4	358	889	268611	0.00719503	2.14297
RedLeggedSerima	BlueCrownedManakin	5	543	891	269376	0.0100562	1.99756
RedLeggedSerima	CrestedIbis	6	790	881	263396	0.0182009	1.73991
RedLeggedSerima	PeregrineFalcon	7	1241	881	267251	0.0560016	1.2518
RedLeggedSerima	EmperorPenguin	5	1032	879	267705	0.127287	0.895214
RedLeggedSerima	GoldenCollaredManakin	4	868	898	268509	0.168111	0.774405
RedLeggedSerima	RockDove	8	1843	881	261692	0.173553	0.760568
RedLeggedSerima	ChimneySwift	14	3450	888	264331	0.19054	0.720015
RedLeggedSerima	CommonCuckoo	14	4065	888	266270	0.382237	0.417667
RedLeggedSerima	Mallard	7	2551	864	254010	0.638373	0.194926
RedLeggedSerima	Killdeer	1	858	882	265895	0.77765	0.109216
RedLeggedSerima	Ostrich	11	4545	885	267224	0.821395	0.0854478
RedLeggedSerima	DownyWoodpecker	17	6434	851	240210	0.872414	0.0592772
RedLeggedSerima	Rifleman	11	4946	880	261824	0.903578	0.0440342
RedLeggedSerima	ChuckWillsWidow	2	1779	893	268700	0.934923	0.0292243
RedLeggedSerima	GreaterPrairieChicken	5	3409	884	266142	0.970067	0.0131981
RedLeggedSerima	Chicken	3	2803	859	255368	0.984872	0.00662021
RedLeggedSerima	WhiteThroatedTinamous	10	6460	830	237761	0.997704	0.000998076
Rifleman	BlueCrownedManakin	74	516	4934	264856	0	10
Rifleman	DownyWoodpecker	226	6397	4559	236825	0	10
Rifleman	GoldenCollaredManakin	97	827	4926	264196	0	10
Rifleman	CrestedIbis	41	784	4926	258901	4.10025e-09	8.38719
Rifleman	Killdeer	25	849	4918	261400	0.0119839	1.9214
Rifleman	GreaterPrairieChicken	74	3383	4912	262043	0.0812594	1.09013
Rifleman	ChimneySwift	72	3441	4845	260121	0.143379	0.843514
Rifleman	GoldenEagle	9	358	4986	263803	0.144462	0.840248
Rifleman	Chicken	53	2789	4807	250937	0.487235	0.312261
Rifleman	AmericanFlamingo	5	369	4639	248636	0.686854	0.163135
Rifleman	EmperorPenguin	16	1030	4958	262933	0.742304	0.129418
Rifleman	ChuckWillsWidow	28	1781	4972	264138	0.80876	0.0921806
Rifleman	PeregrineFalcon	18	1231	4946	262545	0.837991	0.0767607
Rifleman	RedLeggedSerima	11	880	4946	261824	0.903578	0.0440342
Rifleman	Mallard	37	2541	4828	249457	0.958968	0.0181958
Rifleman	RockDove	19	1828	4837	258015	0.997	0.00130503
Rifleman	CommonCuckoo	50	4044	4929	262131	0.999183	0.000354971
Rifleman	WhiteThroatedTinamous	87	6446	4566	233661	0.999889	4.83954e-05
Rifleman	Ostrich	39	4502	4974	262603	1	4.46249e-09
RockDove	CommonCuckoo	41	3987	1842	262063	0.00748165	2.126
RockDove	ChuckWillsWidow	21	1782	1851	263931	0.00892426	2.04943
RockDove	BlueCrownedManakin	7	530	1854	264726	0.0350986	1.45471
RockDove	GoldenCollaredManakin	9	852	1854	264013	0.0817055	1.08775
RockDove	RedLeggedSerima	8	881	1843	261692	0.173553	0.760568
RockDove	ChimneySwift	28	3415	1840	259908	0.185066	0.732674
RockDove	PeregrineFalcon	10	1225	1841	262409	0.246205	0.608702
RockDove	AmericanFlamingo	3	376	1724	248766	0.264885	0.576942
RockDove	GoldenEagle	2	349	1857	263566	0.446109	0.350559
RockDove	Killdeer	5	846	1820	261506	0.536891	0.270114
RockDove	CrestedIbis	4	781	1811	259093	0.637212	0.195716
RockDove	Mallard	16	2543	1792	249413	0.650244	0.186924
RockDove	GreaterPrairieChicken	17	3375	1845	261823	0.908176	0.0418301
RockDove	Ostrich	21	4476	1844	262531	0.969306	0.0135389
RockDove	EmperorPenguin	2	1009	1844	262837	0.972657	0.0120402
RockDove	Chicken	10	2766	1777	250914	0.987149	0.00561747
RockDove	DownyWoodpecker	29	6422	1715	236645	0.996486	0.00152884
RockDove	Rifleman	19	4837	1828	258015	0.997	0.00130503
RockDove	WhiteThroatedTinamous	17	6388	1705	234768	1	2.05808e-07
WhiteThroatedTinamous	Ostrich	415	3911	6209	238710	0	10
WhiteThroatedTinamous	CrestedIbis	25	741	6415	235415	0.117495	0.929982
WhiteThroatedTinamous	GoldenEagle	11	334	6477	239424	0.197661	0.70408
WhiteThroatedTinamous	GoldenCollaredManakin	20	754	6512	239358	0.48711	0.312373
WhiteThroatedTinamous	Killdeer	17	787	6427	237515	0.795431	0.0993976
WhiteThroatedTinamous	BlueCrownedManakin	9	501	6506	239935	0.873137	0.0589177
WhiteThroatedTinamous	AmericanFlamingo	4	345	6068	226666	0.954675	0.0201446
WhiteThroatedTinamous	GreaterPrairieChicken	70	3161	6489	237360	0.96296	0.0163919
WhiteThroatedTinamous	Chicken	50	2586	6187	228714	0.993282	0.00292753
WhiteThroatedTinamous	EmperorPenguin	13	952	6485	238473	0.99635	0.00158808
WhiteThroatedTinamous	Mallard	43	2398	6131	229149	0.997158	0.00123612
WhiteThroatedTinamous	RedLeggedSerima	10	830	6460	237761	0.997704	0.000998076
WhiteThroatedTinamous	PeregrineFalcon	14	1176	6470	238361	0.999741	0.000112694
WhiteThroatedTinamous	Rifleman	87	4566	6446	233661	0.999889	4.83954e-05
WhiteThroatedTinamous	ChuckWillsWidow	21	1670	6508	239735	0.999965	1.51531e-05
WhiteThroatedTinamous	ChimneySwift	49	3207	6430	236052	0.999996	1.6782e-06
WhiteThroatedTinamous	RockDove	17	1705	6388	234768	1	2.05808e-07
WhiteThroatedTinamous	CommonCuckoo	58	3820	6485	237730	1	1.53955e-07
WhiteThroatedTinamous	DownyWoodpecker	89	6045	6118	214663	1	2.58874e-13
