# Supplementary material for: Positive selection in noncoding genomic regions of vocal learning birds is associated with genes implicated in vocal learning and speech functions in humans
Source: HighWire-hosted journal article supplement (doi:10.1101/gr.275989.121), 2021-10-19
Supplement: Supplemental_Table_S9.xlsx [file Supplemental_Table_S9.xlsx]

## Sheet: ARs
Supplemental Table S9: Numbers of regions retained for comparisons between human and bird after converting from chicken to human genome coordinates with liftover. GREAT ontology analysis required converting our accelerated region (Shown Here) and conserved element coordinates into a supported genome (HG37). To achieve this we tranfered our alignments using Liftover. First we transferred corrdinat…
Genome	Humminbird	Oscine Songbird	Parrot	Mallard	Core Waterbirds	American Flamingo	Killdeer
Chicken (GALGA 5.0)	1795	3608	3400	858	147	105	133
Human HG38	766	1354	1519	280	80	49	68
Human HG37	764	1352	1519	280	80	49	68
% Retained GALGA to HG38	0.426741	0.375277	0.446765	0.32634	0.544218	0.466667	0.511278
% Retained GALGA to HG37	0.425627	0.374723	0.446765	0.32634	0.544218	0.466667	0.511278

## Sheet: CE
Table Legend: GREAT ontology analysis required converting our Accelerated region and conserved element (Shown Here) coordinates into a supported genome (HG37). To achieve this we tranfered our alignments using Liftover. First we transferred corrdinates from the chicken reference, GALGA 5.0 to the human referenece HG38. Then from HG38 to the GREAT supported human genome version HG37.
	Hummingbird	Oscine Songbird	Parrot	Mallard	Core Waterbirds	American Flamingo	Killdeer
Chicken (GALGA 5.0)	248283	218598	249145	213531	214212	215056	223975
Human HG38	127582	110731	126518	114176	112044	114148	118457
Human HG37	127500	110657	126444	114114	111979	114087	118391
% Retained GALGA to HG38	0.513857	0.506551	0.507809	0.534705	0.523052	0.530783	0.528885
% Retained GALGA to HG37	0.513527	0.506212	0.507512	0.534414	0.522748	0.530499	0.52859
