# Supplementary material for: Positive selection in noncoding genomic regions of vocal learning birds is associated with genes implicated in vocal learning and speech functions in humans
Source: HighWire-hosted journal article supplement (doi:10.1101/gr.275989.121), 2021-10-19
Supplement: Supplemental_Table_S10.xlsx [file Supplemental_Table_S10.xlsx]

## Sheet: (A) Enrichment
Supplemental Table S10: Convergent ARs with humans. (A) The number of bird ARs convergent with human ARs and tests for enrichment using a hypergeometric test. (B) Locations in the human genome (hg19) of these convergent ARs.
Test	Convergent ARs	Expected Convergent ARs	Fold Excess	Hypergenometric p
Vocal Learner Convergent	6	0.792058	7.57521	1.64024e-05
Oscine Songbird	19	10.1531	1.87135	0.000310246
Parrot	22	11.3285	1.94201	0.00134495
Hummingbird	16	5.52477	2.89605	1.67478e-05
Mallard	4	2.1985	1.81942	0.071328
Ibis/Penguin	1	0.617259	1.62007	0.461987
Killdeer	1	0.520952	1.91956	0.407323
AmericanFlamingo	1	0.373662	2.67621	0.31283

## Sheet: (B) Assoc. Genes
Gene	Distance from AR to TSS
ABCE1	(-447605)
ADAMTS16	(-650161)
AMY1C	(+527758)
ARFGAP2	(+155266)
ARRDC3	(-107267), (-107267)
ARX	(-367407)
ATP10B	(+301010)
ATP5G3	(-386677)
BNC2	(+674980)
C10orf11	(-59091)
C11orf49	(+85038)
C11orf87	(+5125)
CADM1	(-188286)
CDCA7L	(+118915)
CDH6	(-211261), (-211261), (-211149)
CNTN4	(-142752)
CYLD	(+325023), (+325023)
DACH1	(+67691), (+907778)
DACH2	(+914725)
DEFB112	(-285244)
DNAH11	(+283954)
EFNA5	(-93202), (+10768), (+10768), (+293720), (+349067)
ETNK1	(+361196)
FER	(-983725)
FTO	(+424897)
HHIP	(+4306)
ID2	(-806905)
INSC	(+389281)
IRX1	(+894114)
IRX3	(-427638), (+157903)
IRX5	(-216461)
KLF12	(-971680)
KLHL1	(-850961)
KLHL4	(-454467)
LY86	(+173198)
MAF	(+795982)
MAGEB18	(-754988)
MAT2B	(+514466)
MDFIC	(+779111)
MEF2C	(-245556)
MEIS2	(+191572)
NR2F1	(-782752)
NXPH1	(+118495), (+118495)
POU3F1	(-175543)
PSIP1	(-684707)
PTTG1	(+129292)
RBFOX1	(+89799)
RNF144A	(+954547)
RRAGC	(+637502)
RREB1	(-346502)
SALL1	(+83492), (+83492)
SLC4A3	(+853281)
SOX1	(-82518)
SOX5	(+963432)
SOX6	(+974684)
TBC1D4	(+515384)
TENM3	(-892594)
TEX29	(+666380)
TFAP2D	(-379933)
TFEC	(+329475)
TPH2	(+295407)
TRHDE	(-38430)
VRK1	(+290099), (+290099)
WWOX	(+705319)
ZC3H12C	(-666116)
ZNF503	(-321764)
