# Supplementary material for: Positive selection in noncoding genomic regions of vocal learning birds is associated with genes implicated in vocal learning and speech functions in humans
Source: HighWire-hosted journal article supplement (doi:10.1101/gr.275989.121), 2021-10-19
Supplement: SupplementalFigS9.pdf [file SupplementalFigS9.pdf]

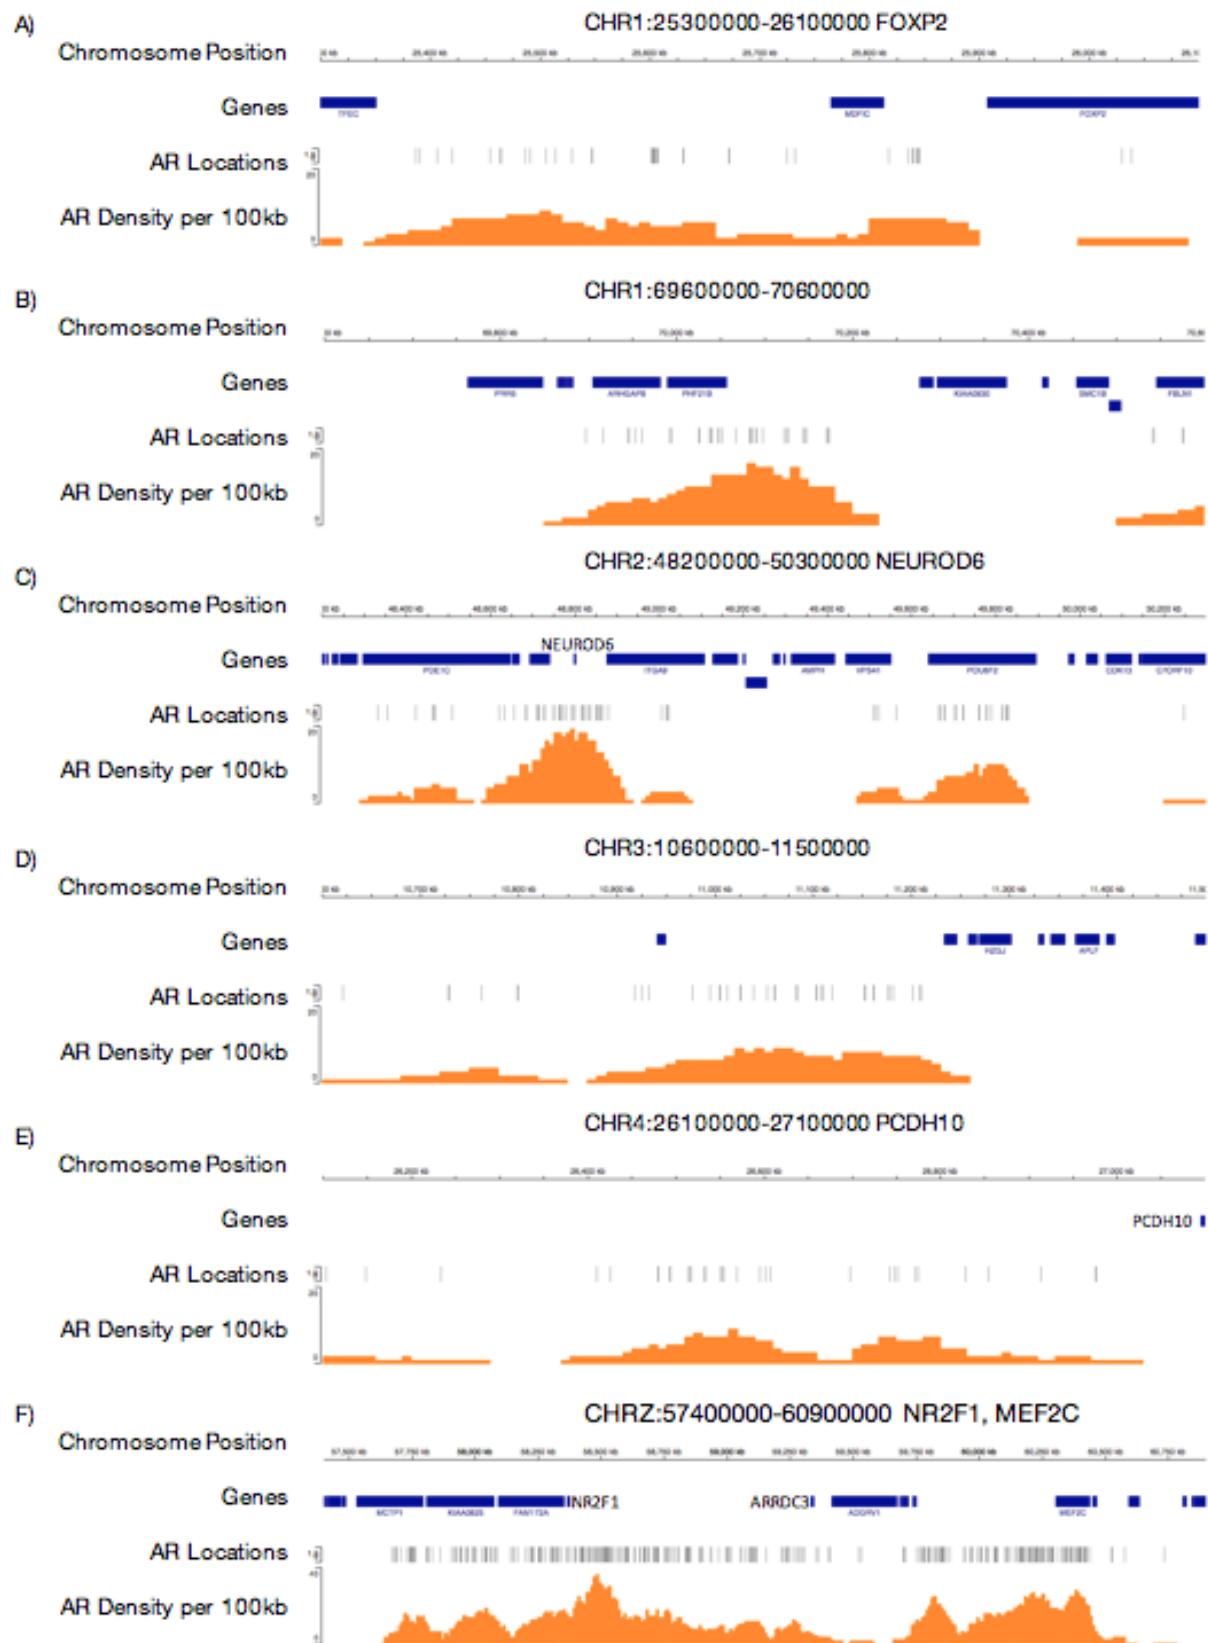

**Supplemental Figure S9. Local distribution of genes overlapping or near oscine AR hotspots.** (A-F) Expanded view of the six hotspots shown in Figure 4A. Each region follows the

following format: Blue, chromosomal position and annotated protein coding genes; Grey, exact nucleotide locations of oscine songbird ARs; Orange, density of ARs per 100kb measured every 10kb. Vocal learning candidate genes discussed in the text located within a hotspot are indicated in the subfigure name after the chromosome position (i.e. Chr 1:25300000-26100000 FOXP2).
