# Supplementary material for: Positive selection in noncoding genomic regions of vocal learning birds is associated with genes implicated in vocal learning and speech functions in humans
Source: HighWire-hosted journal article supplement (doi:10.1101/gr.275989.121), 2021-10-19
Supplement: SupplementalFigS11.pdf [file SupplementalFigS11.pdf]

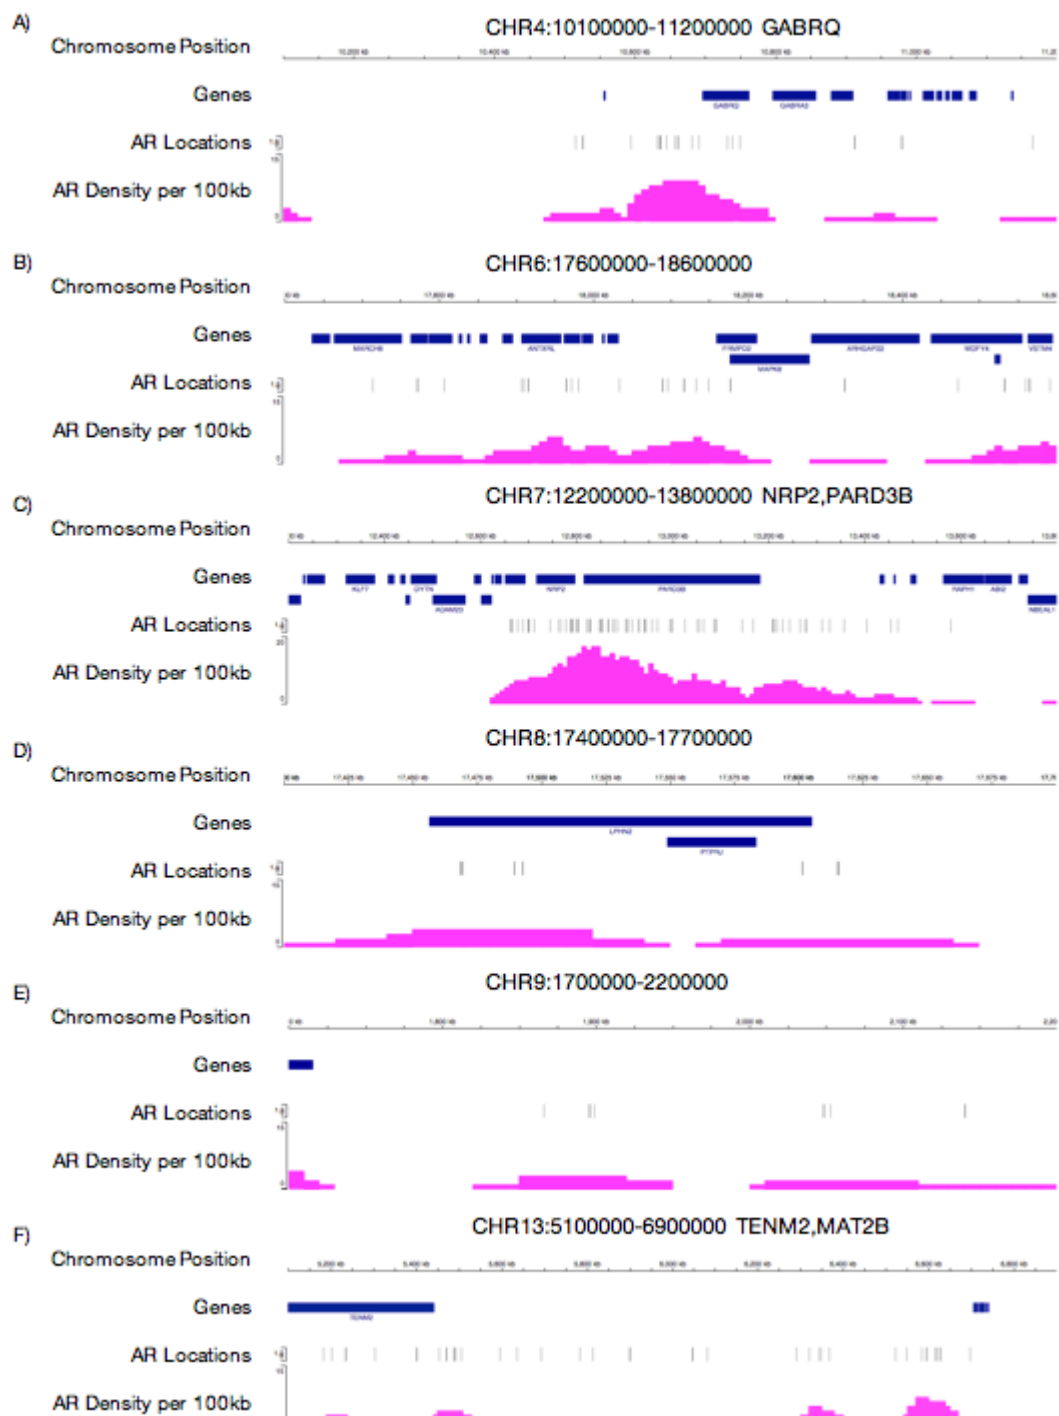

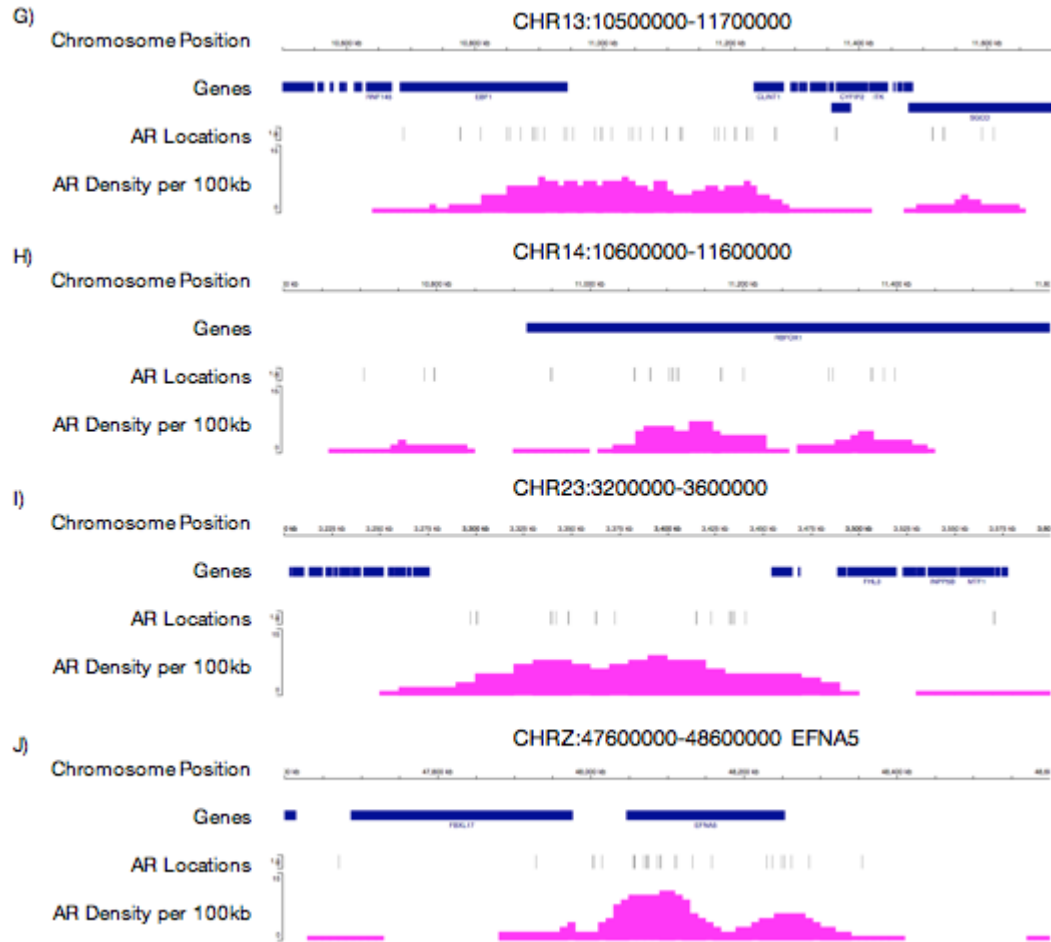

**Supplemental Figure S11. Local distributions of ARs for each hummingbird AR hotspot in Fig. 4C.** Each region follows the following format: chromosomal position, annotated protein coding genes (blue), exact locations of hummingbird ARs (grey), density of hummingbird ARs per 100kb measured every 10kb (pink). Vocal learning candidate genes discussed in the text located within a hotspot are indicated in the subfigure name after the chromosome position (ie Chr Z:47600000-48600000 *EFNA5*).
