# Supplementary material for: Positive selection in noncoding genomic regions of vocal learning birds is associated with genes implicated in vocal learning and speech functions in humans
Source: HighWire-hosted journal article supplement (doi:10.1101/gr.275989.121), 2021-10-19
Supplement: SupplementalFigS14.pdf [file SupplementalFigS14.pdf]

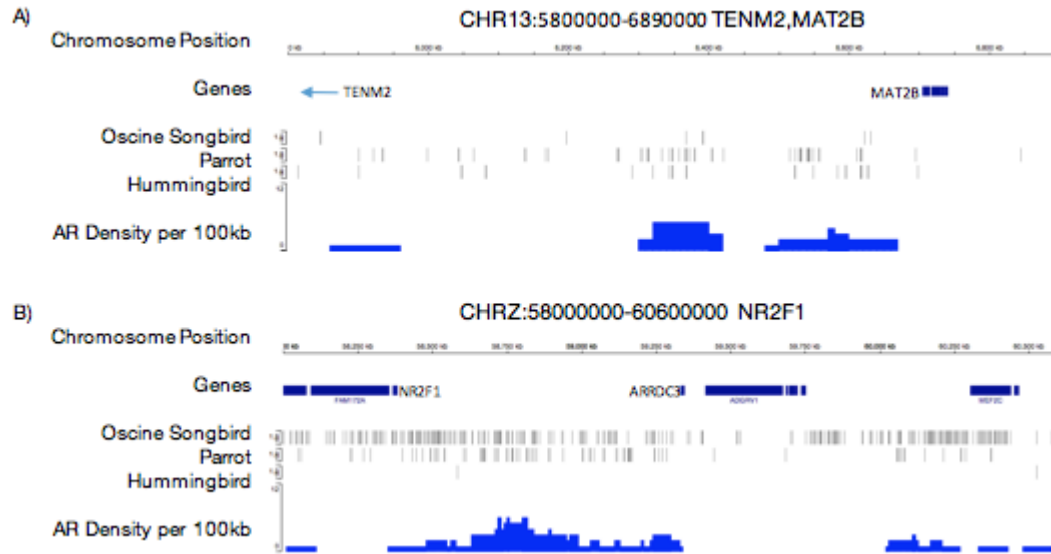

**Supplemental Figure S14. Local distributions of ARs for each vocal learning convergent AR hotspot in Fig. 5B.** Each region follows the following format: chromosomal position, annotated protein coding genes (dark blue), exact locations of oscine songbird ARs, parrot ARs, and hummingbird ARs (grey), density of parrot ARs per 100kb measured every 10kb (light blue). Vocal learning candidate genes discussed in the text located within a hotspot are indicated in the subfigure name after the chromosome position (ie Chr Z:58000000-60600000 *NR2F1*).
